# Supplementary material for: Long-distance electron transport in multicellular freshwater cable bacteria
Source: eLife. 2024 Aug 29;12:RP91097. doi: 10.7554/eLife.91097 (PMC11361709; doi:10.7554/eLife.91097)
Supplement: Figure 5—source data 1. [file elife-91097-fig5-data1.xlsx]

## Sheet: Sheet1
In N2/H2 Time (s)	In N2/H2 Potential (V)	In N2/H2 Current (A)	In N2/H2 R (Ohm)		In air Time (s)	In air Potential (V)	In air Current (A)	In air R (Ohm)		Back in N2/H2 Time (s)	Back in N2/H2 Potential (V)	Back in N2/H2 Current (A)	Back in N2/H2 R (Ohm)
0.0756555	-0.20016	-2.39905e-06	83432.7		0.0756555	-0.199847	-2.48195e-06	80519.9		0.0756555	-0.200003	-1.5195e-06	131625
5.06766	-0.195155	-2.35384e-06	82909.5		5.06766	-0.194921	-2.43705e-06	79982.3		5.06766	-0.194999	-1.48338e-06	131456
10.0597	-0.190151	-2.29826e-06	82737.2		10.0597	-0.189917	-2.37205e-06	80064.4		10.0597	-0.189995	-1.44445e-06	131535
15.0517	-0.185225	-2.23074e-06	83033		15.0517	-0.184913	-2.30862e-06	80096.6		15.0517	-0.185069	-1.41399e-06	130884
20.0437	-0.180221	-2.19494e-06	82107.3		20.0437	-0.179986	-2.24393e-06	80210.3		20.0437	-0.180065	-1.37442e-06	131011
25.0357	-0.175139	-2.1312e-06	82178.5		25.0357	-0.174982	-2.167e-06	80748.8		25.0357	-0.17506	-1.33046e-06	131579
30.0277	-0.170134	-2.07091e-06	82154.5		30.0277	-0.169978	-2.11267e-06	80456.4		30.0277	-0.170056	-1.29686e-06	131129
35.0197	-0.16513	-2.00214e-06	82477		35.0197	-0.164974	-2.02883e-06	81314.8		35.0197	-0.164974	-1.2529e-06	131674
40.0117	-0.160204	-1.9296e-06	83024.6		40.0117	-0.15997	-1.98267e-06	80684		40.0117	-0.160048	-1.21867e-06	131330
45.0037	-0.1552	-1.8847e-06	82347.5		45.0037	-0.154966	-1.91484e-06	80928.6		45.0037	-0.155044	-1.17942e-06	131458
49.9957	-0.150196	-1.80776e-06	83083.9		49.9957	-0.149961	-1.83257e-06	81831.2		49.9957	-0.15004	-1.13859e-06	131776
54.9877	-0.145192	-1.7459e-06	83161.5		54.9877	-0.144957	-1.77856e-06	81502.6		54.9877	-0.145114	-1.09809e-06	132151
59.9797	-0.140266	-1.69597e-06	82705.2		59.9797	-0.139953	-1.72612e-06	81079.6		59.9797	-0.140031	-1.06229e-06	131820
64.9717	-0.135183	-1.63505e-06	82678.2		64.9717	-0.135027	-1.65923e-06	81379.1		64.9717	-0.135027	-1.0221e-06	132108
69.9637	-0.130179	-1.59046e-06	81849.8		69.9637	-0.129945	-1.58952e-06	81750.7		69.9637	-0.130023	-9.89123e-07	131453
74.9557	-0.125175	-1.51667e-06	82532.8		74.9557	-0.12494	-1.52829e-06	81751.8		74.9557	-0.125097	-9.50813e-07	131568
79.9477	-0.120171	-1.45261e-06	82727.4		79.9477	-0.119936	-1.46768e-06	81718		79.9477	-0.120014	-9.12504e-07	131522
84.9397	-0.115167	-1.39766e-06	82399.7		84.9397	-0.11501	-1.40614e-06	81791.6		84.9397	-0.11501	-8.72938e-07	131751
89.9317	-0.110241	-1.33297e-06	82702.9		89.9317	-0.110006	-1.338e-06	82217.1		89.9317	-0.110006	-8.31801e-07	132250
94.9237	-0.105158	-1.2664e-06	83037.2		94.9237	-0.105002	-1.28179e-06	81918.4		94.9237	-0.10508	-7.95376e-07	132114
99.9157	-0.100154	-1.20611e-06	83039		99.9157	-0.0999976	-1.21553e-06	82266.8		99.9157	-0.0999976	-7.60206e-07	131540
104.908	-0.0951498	-1.14174e-06	83337.9		104.908	-0.0949934	-1.14707e-06	82813.8		104.908	-0.0949934	-7.21582e-07	131646
109.9	-0.0902238	-1.08364e-06	83259.8		109.9	-0.0899893	-1.0827e-06	83115.6		109.9	-0.0900675	-6.82644e-07	131939
114.892	-0.0851415	-1.02932e-06	82716.4		114.892	-0.0849851	-1.02586e-06	82842.5		114.892	-0.0850633	-6.45904e-07	131696
119.884	-0.0801373	-9.662e-07	82940.6		119.884	-0.0799809	-9.68398e-07	82590.9		119.884	-0.0800591	-6.06966e-07	131900
124.876	-0.0751331	-9.04653e-07	83051.8		124.876	-0.0749767	-9.08107e-07	82563.7		124.876	-0.0750549	-5.66772e-07	132425
129.868	-0.0702071	-8.40908e-07	83489.6		129.868	-0.0699725	-8.41536e-07	83148.6		129.868	-0.0700507	-5.2909e-07	132398
134.86	-0.0651247	-7.84071e-07	83059.7		134.86	-0.0650465	-7.88153e-07	82530.3		134.86	-0.0651247	-4.9235e-07	132273
139.852	-0.0601205	-7.2378e-07	83064.6		139.852	-0.0599641	-7.21896e-07	83064.8		139.852	-0.0601205	-4.52156e-07	132964
144.844	-0.0551163	-6.62547e-07	83188.5		144.844	-0.0549599	-6.59407e-07	83347.5		144.844	-0.0550381	-4.15102e-07	132589
149.836	-0.0501903	-6.02256e-07	83337.2		149.836	-0.0499557	-6.01314e-07	83077.7		149.836	-0.0500339	-3.78048e-07	132348
154.828	-0.0451079	-5.38825e-07	83715.4		154.828	-0.0450297	-5.39453e-07	83473		154.828	-0.0451079	-3.40681e-07	132405
159.82	-0.0401819	-4.845e-07	82934.9		159.82	-0.0400255	-4.80732e-07	83259.6		159.82	-0.0401037	-3.02371e-07	132631
164.812	-0.0351777	-4.22639e-07	83233.6		164.812	-0.0350214	-4.18243e-07	83734.6		164.812	-0.0350995	-2.64375e-07	132764
169.804	-0.0301735	-3.62662e-07	83200.3		169.804	-0.0300172	-3.58579e-07	83711.3		169.804	-0.0300954	-2.26693e-07	132758
174.796	-0.0250912	-3.01429e-07	83240.8		174.796	-0.025013	-2.9766e-07	84031.9		174.796	-0.025013	-1.88383e-07	132777
179.788	-0.0201652	-2.40824e-07	83734.2		179.788	-0.0200088	-2.37997e-07	84071.5		179.788	-0.020087	-1.51015e-07	133013
184.78	-0.015161	-1.7959e-07	84419.7		184.78	-0.0150046	-1.77078e-07	84734.2		184.78	-0.015161	-1.12705e-07	134519
189.772	-0.0101568	-1.18671e-07	85587.5		189.772	-0.0100786	-1.17101e-07	86067.4		189.772	-0.0100786	-7.37643e-08	136632
194.764	-0.00507441	-5.77213e-08	87912.2		194.764	-0.00507441	-5.62457e-08	90218.5		194.764	-0.00507441	-3.52422e-08	143987
199.756	-0.000148406	2.53423e-09	-58560.7		199.756	-7.02155e-05	2.9605e-09	-23717.5		199.756	-7.02155e-05	1.69724e-09	-41370.4
204.748	0.00485578	6.2847e-08	77263.6		204.748	0.00501217	6.30959e-08	79437.2		204.748	0.00493397	3.91687e-08	125967
209.74	0.00985997	1.22833e-07	80271.1		209.74	0.0100164	1.21797e-07	82237.8		209.74	0.00993817	7.67491e-08	129489
214.732	0.014786	1.82516e-07	81011.9		214.732	0.0149424	1.8148e-07	82336.1		214.732	0.0149424	1.13572e-07	131567
219.724	0.0198684	2.41194e-07	82375		219.724	0.0199465	2.3975e-07	83197.3		219.724	0.0199465	1.51215e-07	131909
224.716	0.0248725	3.01504e-07	82494.8		224.716	0.0250289	2.98647e-07	83807.6		224.716	0.0248725	1.88481e-07	131963
229.708	0.0298767	3.60182e-07	82948.9		229.708	0.0299549	3.58016e-07	83669.2		229.708	0.0299549	2.25559e-07	132803
234.7	0.0348809	4.21246e-07	82804.1		234.7	0.0349591	4.17259e-07	83782.7		234.7	0.0348809	2.64018e-07	132116
239.692	0.0398069	4.80741e-07	82803.3		239.692	0.0399633	4.76502e-07	83868		239.692	0.0398851	3.01002e-07	132508
244.684	0.0448111	5.3832e-07	83242.6		244.684	0.0449675	5.3697e-07	83743.1		244.684	0.0448893	3.39493e-07	132225
249.676	0.0498935	5.97657e-07	83481.8		249.676	0.0499717	5.96119e-07	83828.4		249.676	0.0499717	3.77701e-07	132305
254.668	0.0548977	6.59914e-07	83189.2		254.668	0.0550541	6.5712e-07	83780.9		254.668	0.0548977	4.13743e-07	132686
259.66	0.0599019	7.22328e-07	82928.9		259.66	0.0600583	7.15327e-07	83959.2		259.66	0.0599019	4.49785e-07	133179
264.652	0.0648279	7.73785e-07	83780.2		264.652	0.0649843	7.75104e-07	83839.5		264.652	0.0649061	4.85764e-07	133617
269.644	0.0698321	8.39276e-07	83205.2		269.644	0.0699885	8.32588e-07	84061.3		269.644	0.0699103	5.27645e-07	132495
274.636	0.0748363	8.96635e-07	83463.5		274.636	0.0749144	8.88755e-07	84291.5		274.636	0.0749926	5.61615e-07	133530
279.628	0.0797623	9.51828e-07	83799		279.628	0.0799186	9.49819e-07	84140.9		279.628	0.0799186	6.01456e-07	132875
284.62	0.0849228	1.01597e-06	83588		284.62	0.085001	1.009e-06	84242.9		284.62	0.0849228	6.38534e-07	132997
289.612	0.0898488	1.07961e-06	83223.2		289.612	0.089927	1.07365e-06	83758.5		289.612	0.089927	6.73288e-07	133564
294.604	0.094853	1.1465e-06	82732.8		294.604	0.0950094	1.13362e-06	83810.3		294.604	0.0949312	7.11088e-07	133501
299.596	0.0998572	1.20899e-06	82595.7		299.596	0.100014	1.19203e-06	83901.8		299.596	0.0999354	7.41605e-07	134756
304.588	0.104861	1.27619e-06	82167.7		304.588	0.10494	1.25358e-06	83712		304.588	0.10494	7.80504e-07	134451
309.58	0.109787	1.32769e-06	82690.8		309.58	0.109944	1.30696e-06	84121.7		309.58	0.109944	8.26247e-07	133064
314.572	0.11487	1.39803e-06	82165.7		314.572	0.114948	1.37228e-06	83764.5		314.572	0.11487	8.6323e-07	133070
319.564	0.119952	1.45675e-06	82342.5		319.564	0.119952	1.43037e-06	83861		319.564	0.119874	9.00811e-07	133073
324.556	0.124878	1.52206e-06	82045.4		324.556	0.124956	1.48658e-06	84056.4		324.556	0.124878	9.36319e-07	133371
329.548	0.129804	1.56665e-06	82854.5		329.548	0.129961	1.53933e-06	84426.5		329.548	0.129882	9.70226e-07	133868
334.54	0.134808	1.62443e-06	82988		334.54	0.134965	1.60308e-06	84191		334.54	0.134887	1.01135e-06	133372
339.532	0.139891	1.68912e-06	82818.8		339.532	0.139969	1.66086e-06	84275.1		339.532	0.139969	1.05449e-06	132736
344.524	0.144817	1.75475e-06	82528.5		344.524	0.144973	1.73245e-06	83680.9		344.524	0.144973	1.09312e-06	132624
349.516	0.149899	1.81347e-06	82658.8		349.516	0.149977	1.79117e-06	83731.3		349.516	0.149899	1.13174e-06	132450
354.508	0.154825	1.87093e-06	82752.9		354.508	0.154903	1.84927e-06	83764.7		354.508	0.154981	1.16565e-06	132957
359.5	0.159829	1.94033e-06	82372.2		359.5	0.159986	1.90296e-06	84071.9		359.5	0.159986	1.20114e-06	133195
364.492	0.164834	2.00094e-06	82378.2		364.492	0.164912	1.97205e-06	83624.6		364.492	0.164912	1.2407e-06	132918
369.484	0.169838	2.07379e-06	81897.3		369.484	0.169916	2.02983e-06	83709.6		369.484	0.169916	1.28027e-06	132719
374.476	0.17492	2.11995e-06	82511.5		374.476	0.17492	2.09012e-06	83689.2		374.476	0.17492	1.32737e-06	131779
379.468	0.179846	2.19939e-06	81770.7		379.468	0.179924	2.14821e-06	83755.5		379.468	0.180002	1.36254e-06	132108
384.46	0.184928	2.2534e-06	82066.2		384.46	0.184928	2.21007e-06	83675.4		384.46	0.184928	1.3996e-06	132130
389.452	0.189854	2.31715e-06	81934.5		389.452	0.189933	2.2644e-06	83877.9		389.452	0.189854	1.43728e-06	132093
394.444	0.194859	2.36143e-06	82517.4		394.444	0.194937	2.32657e-06	83787.2		394.444	0.194937	1.47684e-06	131996
399.436	0.199863	2.43679e-06	82018.9		399.436	0.199941	2.38152e-06	83955.1		399.436	0.199941	1.51264e-06	132180
400.078	0.200254	2.44558e-06	81883.9		400.078	0.200332	2.3878e-06	83898		400.078	0.200332	1.51735e-06	132027
405.07	0.194859	2.3787e-06	81918.2		405.07	0.195015	2.3228e-06	83956.8		405.07	0.195015	1.46522e-06	133096
410.062	0.189933	2.31746e-06	81957.1		410.062	0.190011	2.26314e-06	83959		410.062	0.190011	1.42472e-06	133367
415.054	0.184928	2.25686e-06	81940.6		415.054	0.185007	2.19845e-06	84153.1		415.054	0.184928	1.3817e-06	133842
420.046	0.179924	2.1815e-06	82477.5		420.046	0.180002	2.14099e-06	84074.5		420.046	0.180002	1.34558e-06	133773
425.038	0.17492	2.13314e-06	82001.3		425.038	0.175076	2.07693e-06	84295.9		425.038	0.174998	1.30445e-06	134155
430.03	0.169916	2.05683e-06	82610.5		430.03	0.169994	2.02574e-06	83916.9		430.03	0.169994	1.27085e-06	133764
435.022	0.16499	1.99403e-06	82742		435.022	0.165068	1.9485e-06	84715.7		435.022	0.165068	1.22532e-06	134715
440.014	0.159907	1.93405e-06	82680.1		440.014	0.160064	1.89448e-06	84489.4		440.014	0.159986	1.19172e-06	134248
445.006	0.15506	1.87407e-06	82739.4		445.006	0.15506	1.82446e-06	84989.4		445.006	0.154981	1.15309e-06	134405
449.998	0.149977	1.82195e-06	82317.1		449.998	0.150055	1.77798e-06	84396.4		449.998	0.149977	1.11133e-06	134953
454.99	0.144973	1.75695e-06	82514.3		454.99	0.145051	1.71644e-06	84507.2		454.99	0.144973	1.07522e-06	134831
459.982	0.139969	1.70042e-06	82314.2		459.982	0.140047	1.65834e-06	84449.9		459.982	0.140047	1.03754e-06	134981
464.974	0.134965	1.626e-06	83004.1		464.974	0.135043	1.60182e-06	84305.8		464.974	0.134965	9.98283e-07	135197
469.966	0.129961	1.57921e-06	82294.5		469.966	0.129961	1.53399e-06	84720.3		469.966	0.129961	9.60287e-07	135335
474.958	0.124878	1.51829e-06	82249		474.958	0.125113	1.47025e-06	85096.3		474.958	0.125035	9.25117e-07	135155
479.95	0.119952	1.47433e-06	81360.4		479.95	0.120109	1.41781e-06	84714.2		479.95	0.119952	8.88692e-07	134976
484.942	0.115026	1.40054e-06	82130		484.942	0.115026	1.34653e-06	85424.3		484.942	0.114948	8.52894e-07	134774
489.934	0.109944	1.33993e-06	82051.7		489.934	0.1101	1.28938e-06	85390.3		489.934	0.109944	8.1741e-07	134503
494.926	0.10494	1.27242e-06	82472.5		494.926	0.105018	1.23003e-06	85378.4		494.926	0.105018	7.7439e-07	135614
499.918	0.0999354	1.2115e-06	82489		499.918	0.100014	1.17664e-06	84999		499.918	0.0999354	7.41104e-07	134847
504.91	0.0949312	1.14995e-06	82552.3		504.91	0.0950094	1.11541e-06	85178.8		504.91	0.0950094	7.0405e-07	134947
509.902	0.0900052	1.09751e-06	82008.4		509.902	0.0900052	1.057e-06	85151.2		509.902	0.089927	6.70137e-07	134192
514.894	0.085001	1.03408e-06	82199.6		514.894	0.085001	9.97655e-07	85200.8		514.894	0.085001	6.31513e-07	134599
519.886	0.0799968	9.73162e-07	82203		519.886	0.0801532	9.3391e-07	85825.4		519.886	0.0799968	6.00425e-07	133234
524.878	0.0749144	9.15069e-07	81867.5		524.878	0.0750708	8.76131e-07	85684.5		524.878	0.0749926	5.57405e-07	134539
529.87	0.0699103	8.45043e-07	82729.8		529.87	0.0700666	8.16782e-07	85783.8		529.87	0.0699885	5.22235e-07	134017
534.862	0.0649061	7.89777e-07	82182.8		534.862	0.0650624	7.59003e-07	85720.9		534.862	0.0649843	4.83611e-07	134373
539.854	0.0599019	7.25717e-07	82541.6		539.854	0.0600583	7.00596e-07	85724.5		539.854	0.0599019	4.45301e-07	134520
544.846	0.0549759	6.71393e-07	81883.4		544.846	0.0550541	6.44073e-07	85478		544.846	0.0549759	4.10445e-07	133942
549.838	0.0499717	6.01053e-07	83140.2		549.838	0.0500499	5.86294e-07	85366.5		549.838	0.0499717	3.74962e-07	133271
554.83	0.0449675	5.48612e-07	81965.9		554.83	0.0450457	5.27887e-07	85332		554.83	0.0449675	3.3728e-07	133324
559.822	0.0399633	4.84867e-07	82421.1		559.822	0.0400415	4.66026e-07	85921.1		559.822	0.0399633	2.9897e-07	133670
564.814	0.0348809	4.25832e-07	81912.4		564.814	0.0350373	4.07619e-07	85956		564.814	0.0350373	2.63486e-07	132976
569.806	0.0298767	3.64599e-07	81944.1		569.806	0.0301113	3.50154e-07	85994.4		569.806	0.0300331	2.2549e-07	133190
574.798	0.0249507	3.03994e-07	82076.4		574.798	0.0250289	2.93632e-07	85239.2		574.798	0.0249507	1.8718e-07	133298
579.79	0.0199465	2.43389e-07	81953.4		579.79	0.0201029	2.34283e-07	85806.3		579.79	0.0200247	1.5044e-07	133108
584.782	0.0149424	1.83726e-07	81329.6		584.782	0.0150205	1.76818e-07	84949.4		584.782	0.0149424	1.12758e-07	132517
589.774	0.00993817	1.22807e-07	80925.2		589.774	0.0100164	1.19667e-07	83702.1		589.774	0.00993817	7.63325e-08	130196
594.766	0.00501217	6.33078e-08	79171.3		594.766	0.00509036	6.19578e-08	82158.4		594.766	0.00493397	3.92904e-08	125577
599.758	-7.02155e-05	3.58279e-09	-19598		599.758	8.61654e-05	3.7757e-09	22821		599.758	7.97493e-06	2.28842e-09	3484.91
604.75	-0.00507441	-5.60735e-08	90495.6		604.75	-0.00491802	-5.33012e-08	92268.6		604.75	-0.00499622	-3.54755e-08	140836
609.742	-0.0100786	-1.15081e-07	87578.6		609.742	-0.00992222	-1.11376e-07	89087.6		609.742	-0.0100004	-7.31741e-08	136666
614.734	-0.0150828	-1.74543e-07	86412.8		614.734	-0.0150046	-1.67574e-07	89540.3		614.734	-0.0150046	-1.10717e-07	135522
619.726	-0.020087	-2.3567e-07	85233.4		619.726	-0.0199306	-2.26095e-07	88151.6		619.726	-0.020087	-1.48454e-07	135308
624.718	-0.0250912	-2.96923e-07	84504.1		624.718	-0.0249348	-2.83548e-07	87938.5		624.718	-0.025013	-1.85846e-07	134590
629.71	-0.0300172	-3.55255e-07	84494.7		629.71	-0.0298608	-3.40123e-07	87794.2		629.71	-0.0300172	-2.22359e-07	134994
634.702	-0.0350214	-4.14467e-07	84497.4		634.702	-0.0350214	-3.98455e-07	87892.8		634.702	-0.0350214	-2.60064e-07	134664
639.694	-0.0399474	-4.75342e-07	84039.1		639.694	-0.0399474	-4.56851e-07	87440.7		639.694	-0.0399474	-2.97927e-07	134084
644.686	-0.0451079	-5.35684e-07	84206.2		644.686	-0.0449515	-5.13676e-07	87509.5		644.686	-0.0451079	-3.34942e-07	134674
649.678	-0.0500339	-5.97125e-07	83791.4		649.678	-0.0499557	-5.68053e-07	87942		649.678	-0.0500339	-3.72837e-07	134198
654.67	-0.0550381	-6.57593e-07	83696.4		654.67	-0.0549599	-6.29933e-07	87247.2		654.67	-0.0551163	-4.10197e-07	134365
659.662	-0.0600423	-7.1514e-07	83958.8		659.662	-0.0598859	-6.87795e-07	87069.5		659.662	-0.0600423	-4.49912e-07	133453
664.654	-0.0650465	-7.75451e-07	83882.2		664.654	-0.0649683	-7.45123e-07	87191.4		664.654	-0.0650465	-4.86582e-07	133680
669.646	-0.0701289	-8.3529e-07	83957.5		669.646	-0.0698943	-8.05684e-07	86751.5		669.646	-0.0700507	-5.26266e-07	133109
674.638	-0.0750549	-8.98678e-07	83517		674.638	-0.0749767	-8.64268e-07	86751.6		674.638	-0.0750549	-5.64474e-07	132964
679.63	-0.0800591	-9.65267e-07	82939.8		679.63	-0.0799027	-9.21565e-07	86703.3		679.63	-0.0800591	-6.01112e-07	133185
684.622	-0.0850633	-1.03026e-06	82564.9		684.622	-0.0849851	-9.78296e-07	86870.5		684.622	-0.0849851	-6.38316e-07	133140
689.614	-0.0899893	-1.08301e-06	83091.5		689.614	-0.0899111	-1.04251e-06	86245.1		689.614	-0.0900675	-6.79726e-07	132505
694.606	-0.0950716	-1.15367e-06	82408.2		694.606	-0.0949934	-1.09997e-06	86360		694.606	-0.0949934	-7.1492e-07	132873
699.598	-0.100076	-1.2215e-06	81929		699.598	-0.0999195	-1.16403e-06	85839.2		699.598	-0.100076	-7.56048e-07	132367
704.59	-0.105002	-1.28587e-06	81658.3		704.59	-0.105002	-1.22495e-06	85719.3		704.59	-0.10508	-7.95167e-07	132148
709.582	-0.110006	-1.34553e-06	81756.6		709.582	-0.110006	-1.28367e-06	85696.5		709.582	-0.110084	-8.32496e-07	132234
714.574	-0.11501	-1.40111e-06	82084.9		714.574	-0.114932	-1.33768e-06	85918.9		714.574	-0.11501	-8.69072e-07	132337
719.566	-0.120093	-1.47334e-06	81510.7		719.566	-0.120014	-1.39577e-06	85984.1		719.566	-0.120014	-9.11016e-07	131737
724.558	-0.125019	-1.54211e-06	81070.1		724.558	-0.12494	-1.46297e-06	85401.7		724.558	-0.125019	-9.47278e-07	131977
729.55	-0.130101	-1.61182e-06	80717		729.55	-0.129866	-1.51353e-06	85803.7		729.55	-0.130023	-9.87401e-07	131682
734.542	-0.135105	-1.663e-06	81241.8		734.542	-0.134949	-1.5779e-06	85524.1		734.542	-0.134949	-1.03591e-06	130271
739.534	-0.140109	-1.72141e-06	81392.3		739.534	-0.140031	-1.62595e-06	86122.8		739.534	-0.140031	-1.07705e-06	130014
744.526	-0.145035	-1.77856e-06	81546.5		744.526	-0.144957	-1.69283e-06	85629.9		744.526	-0.145114	-1.11347e-06	130325
749.518	-0.15004	-1.85267e-06	80985.7		749.518	-0.149961	-1.74904e-06	85739.1		749.518	-0.150118	-1.1543e-06	130051
754.51	-0.155044	-1.91045e-06	81155.8		754.51	-0.154966	-1.80902e-06	85662.8		754.51	-0.155044	-1.19166e-06	130107
759.502	-0.160048	-1.98487e-06	80634.1		759.502	-0.15997	-1.87779e-06	85190.5		759.502	-0.160048	-1.23374e-06	129726
764.494	-0.16513	-2.03856e-06	81003.2		764.494	-0.164896	-1.9362e-06	85164.8		764.494	-0.165052	-1.27362e-06	129593
769.486	-0.170056	-2.10137e-06	80926.5		769.486	-0.1699	-1.99397e-06	85206.7		769.486	-0.170056	-1.31068e-06	129747
774.478	-0.175139	-2.15915e-06	81114.8		774.478	-0.174904	-2.05835e-06	84973.1		774.478	-0.17506	-1.34993e-06	129681
779.47	-0.180065	-2.23168e-06	80685.6		779.47	-0.179908	-2.1155e-06	85043		779.47	-0.180065	-1.39075e-06	129473
784.462	-0.185069	-2.2926e-06	80724.3		784.462	-0.184913	-2.17548e-06	84998.7		784.462	-0.185069	-1.43e-06	129419
789.454	-0.190073	-2.36765e-06	80279.1		789.454	-0.189917	-2.22917e-06	85196.1		789.454	-0.190073	-1.47459e-06	128899
794.446	-0.195077	-2.43674e-06	80056.8		794.446	-0.194999	-2.29041e-06	85137.4		794.446	-0.195077	-1.52169e-06	128197
799.438	-0.200081	-2.48604e-06	80482.1		799.438	-0.200003	-2.35038e-06	85093.9		799.438	-0.200003	-1.5666e-06	127667
800.077	-0.200472	-2.48824e-06	80568.1		800.077	-0.200316	-2.35698e-06	84988.5		800.077	-0.200394	-1.56346e-06	128174
805.069	-0.195234	-2.42889e-06	80379.9		805.069	-0.195077	-2.28255e-06	85464.4		805.069	-0.195155	-1.52044e-06	128355
810.061	-0.190229	-2.36922e-06	80291.9		810.061	-0.190073	-2.23011e-06	85230.2		810.061	-0.190073	-1.48276e-06	128189
815.053	-0.185147	-2.29103e-06	80813.8		815.053	-0.185069	-2.17171e-06	85218.1		815.053	-0.185069	-1.44507e-06	128069
820.045	-0.180143	-2.23043e-06	80766.1		820.045	-0.180065	-2.10671e-06	85472.2		820.045	-0.180143	-1.4099e-06	127770
825.037	-0.17506	-2.1783e-06	80365.6		825.037	-0.17506	-2.04767e-06	85492.5		825.037	-0.175217	-1.3628e-06	128571
830.029	-0.170134	-2.11236e-06	80542.4		830.029	-0.170056	-1.98958e-06	85473.6		830.029	-0.170134	-1.32104e-06	128788
835.021	-0.16513	-2.05081e-06	80519.5		835.021	-0.165052	-1.93023e-06	85509.1		835.021	-0.16513	-1.28273e-06	128734
840.013	-0.160126	-1.98989e-06	80469.8		840.013	-0.160126	-1.86586e-06	85819.1		840.013	-0.160204	-1.24473e-06	128706
845.005	-0.155122	-1.9252e-06	80574.2		845.005	-0.154966	-1.80525e-06	85841.6		845.005	-0.155122	-1.19983e-06	129287
849.997	-0.150118	-1.86052e-06	80686		849.997	-0.15004	-1.75689e-06	85400.5		849.997	-0.150118	-1.16905e-06	128410
854.989	-0.145114	-1.7996e-06	80636.6		854.989	-0.145035	-1.68749e-06	85947.1		854.989	-0.145114	-1.13483e-06	127873
859.981	-0.140031	-1.73711e-06	80611.6		859.981	-0.140109	-1.61935e-06	86521.8		859.981	-0.140109	-1.09526e-06	127923
864.973	-0.135105	-1.67964e-06	80436.8		864.973	-0.135027	-1.56691e-06	86173.9		864.973	-0.135105	-1.05098e-06	128551
869.965	-0.130101	-1.61213e-06	80701.2		869.965	-0.130101	-1.50442e-06	86479		869.965	-0.130101	-1.01205e-06	128552
874.957	-0.125019	-1.54525e-06	80905.3		874.957	-0.125019	-1.43942e-06	86853.3		874.957	-0.125097	-9.76877e-07	128058
879.949	-0.120093	-1.47177e-06	81597.6		879.949	-0.120014	-1.38384e-06	86725.5		879.949	-0.120093	-9.35113e-07	128426
884.941	-0.115088	-1.4121e-06	81501.4		884.941	-0.115088	-1.32889e-06	86605		884.941	-0.115167	-8.96489e-07	128464
889.933	-0.110084	-1.35056e-06	81510.3		889.933	-0.110006	-1.2708e-06	86564.7		889.933	-0.110084	-8.55667e-07	128653
894.925	-0.105158	-1.29592e-06	81145.8		894.925	-0.10508	-1.20831e-06	86964.7		894.925	-0.105158	-8.12646e-07	129402
899.917	-0.100154	-1.23343e-06	81199.7		899.917	-0.0999976	-1.14393e-06	87415.6		899.917	-0.100154	-7.71196e-07	129868
904.909	-0.0950716	-1.17659e-06	80802.6		904.909	-0.0949934	-1.09024e-06	87131		904.909	-0.0951498	-7.31002e-07	130164
909.901	-0.0901456	-1.1141e-06	80913.3		909.901	-0.0900675	-1.02806e-06	87609		909.901	-0.0901456	-6.94262e-07	129844
914.893	-0.0850633	-1.05193e-06	80864.3		914.893	-0.0851415	-9.68398e-07	87919.9		914.893	-0.0851415	-6.56895e-07	129612
919.885	-0.0800591	-9.9509e-07	80454.1		919.885	-0.0800591	-9.07479e-07	88221.4		919.885	-0.0801373	-6.16701e-07	129945
924.877	-0.0750549	-9.30402e-07	80669.3		924.877	-0.0750549	-8.4813e-07	88494.5		924.877	-0.0751331	-5.80275e-07	129478
929.869	-0.0700507	-8.67285e-07	80770.1		929.869	-0.0699725	-7.96318e-07	87870.1		929.869	-0.0700507	-5.39453e-07	129855
934.861	-0.0651247	-8.03226e-07	81078.9		934.861	-0.0650465	-7.37283e-07	88224.6		934.861	-0.0651247	-5.03341e-07	129385
939.853	-0.0600423	-7.43877e-07	80715.4		939.853	-0.0601205	-6.8076e-07	88313.8		939.853	-0.0601205	-4.64717e-07	129370
944.845	-0.0550381	-6.75422e-07	81487.1		944.845	-0.0551163	-6.21097e-07	88740.3		944.845	-0.0551945	-4.25151e-07	129823
949.837	-0.0501121	-6.14502e-07	81549.1		949.837	-0.0500339	-5.66144e-07	88376.7		949.837	-0.0501121	-3.86527e-07	129647
954.829	-0.0451079	-5.55781e-07	81161.3		954.829	-0.0451079	-5.05853e-07	89172		954.829	-0.0451861	-3.47275e-07	130116
959.821	-0.0400255	-4.9549e-07	80779.7		959.821	-0.0401037	-4.5247e-07	88632.9		959.821	-0.0401037	-3.08965e-07	129800
964.813	-0.0350214	-4.30803e-07	81293.2		964.813	-0.0350995	-3.96575e-07	88506.6		964.813	-0.0350995	-2.69399e-07	130288
969.805	-0.0300954	-3.6957e-07	81433.4		969.805	-0.0300172	-3.38168e-07	88763.9		969.805	-0.0301735	-2.31089e-07	130571
974.797	-0.0250912	-3.05511e-07	82128.6		974.797	-0.0250912	-2.80076e-07	89587.2		974.797	-0.0250912	-1.91837e-07	130794
979.789	-0.0200088	-2.4365e-07	82121.1		979.789	-0.020087	-2.24809e-07	89351.4		979.789	-0.0201652	-1.54155e-07	130811
984.781	-0.0150828	-1.83045e-07	82399.5		984.781	-0.0150828	-1.66716e-07	90470.1		984.781	-0.015161	-1.14903e-07	131946
989.773	-0.0100786	-1.20869e-07	83384.1		989.773	-0.0100004	-1.11135e-07	89984.3		989.773	-0.0101568	-7.53969e-08	134711
994.765	-0.00507441	-5.82864e-08	87059.8		994.765	-0.00507441	-5.34201e-08	94990.5		994.765	-0.0051526	-3.67806e-08	140090
999.757	-7.02155e-05	3.41166e-09	-20581		999.757	7.97493e-06	2.83293e-09	2815.08		999.757	-7.02155e-05	1.67546e-09	-41908.2
1004.75	0.00493397	6.54513e-08	75383.9		1004.75	0.00485578	5.88955e-08	82447.5		1004.75	0.00493397	4.01239e-08	122968
1009.74	0.00993817	1.27354e-07	78035.5		1009.74	0.00993817	1.15581e-07	85984.3		1009.74	0.00985997	7.8896e-08	124974
1014.73	0.0148642	1.88921e-07	78679.4		1014.73	0.0148642	1.70429e-07	87216.3		1014.73	0.0148642	1.17999e-07	125969
1019.72	0.0198684	2.49796e-07	79538.2		1019.72	0.0199465	2.28447e-07	87313.5		1019.72	0.0198684	1.55516e-07	127758
1024.72	0.0247944	3.12304e-07	79391.6		1024.72	0.0249507	2.85618e-07	87356.9		1024.72	0.0248725	1.93944e-07	128246
1029.71	0.0298767	3.73086e-07	80080		1029.71	0.0298767	3.41942e-07	87373.8		1029.71	0.0298767	2.32874e-07	128296
1034.7	0.0348809	4.3528e-07	80134.4		1034.7	0.0350373	3.95282e-07	88638.7		1034.7	0.0348809	2.70831e-07	128792
1039.69	0.0399633	4.95842e-07	80596.9		1039.69	0.0399633	4.56284e-07	87584.4		1039.69	0.0398851	3.09918e-07	128696
1044.68	0.0448893	5.59951e-07	80166.5		1044.68	0.0449675	5.0997e-07	88176.8		1044.68	0.0448893	3.491e-07	128586
1049.68	0.0498935	6.19979e-07	80476.1		1049.68	0.0498935	5.69433e-07	87619.7		1049.68	0.0498153	3.86492e-07	128891
1054.67	0.0548977	6.83209e-07	80352.7		1054.67	0.0548977	6.2045e-07	88480.4		1054.67	0.0548977	4.26113e-07	128834
1059.66	0.0599019	7.45843e-07	80314.3		1059.66	0.0599019	6.81294e-07	87923.7		1059.66	0.0599019	4.65137e-07	128783
1064.65	0.0649061	8.08979e-07	80232.1		1064.65	0.0649061	7.34729e-07	88340.1		1064.65	0.0648279	5.03628e-07	128722
1069.64	0.0699103	8.75914e-07	79814.1		1069.64	0.0698321	7.92842e-07	88078.2		1069.64	0.0699103	5.40455e-07	129355
1074.64	0.0748363	9.33713e-07	80149.1		1074.64	0.0749144	8.49385e-07	88198.5		1074.64	0.0749144	5.79919e-07	129181
1079.63	0.0799186	9.95342e-07	80292.6		1079.63	0.0799186	9.00622e-07	88737.1		1079.63	0.0799186	6.18503e-07	129213
1084.62	0.0849228	1.06485e-06	79750.6		1084.62	0.0849228	9.64009e-07	88093.4		1084.62	0.0849228	6.57873e-07	129087
1089.61	0.089927	1.12609e-06	79857.9		1089.61	0.0898488	1.01415e-06	88595.4		1089.61	0.0898488	6.98499e-07	128631
1094.6	0.094853	1.18198e-06	80249.1		1094.6	0.0949312	1.07585e-06	88238.7		1094.6	0.094853	7.33724e-07	129276
1099.6	0.0999354	1.24824e-06	80061.1		1099.6	0.0999354	1.13582e-06	87985.1		1099.6	0.0998572	7.69672e-07	129740
1104.59	0.10494	1.31732e-06	79661.2		1104.59	0.104861	1.18167e-06	88740.1		1104.59	0.104861	8.13249e-07	128941
1109.58	0.109944	1.37259e-06	80099.5		1109.58	0.109944	1.2407e-06	88614.1		1109.58	0.109944	8.56543e-07	128358
1114.57	0.11487	1.43916e-06	79817.2		1114.57	0.114948	1.29597e-06	88696.5		1114.57	0.114948	8.97734e-07	128042
1119.56	0.119952	1.49945e-06	79997.3		1119.56	0.119952	1.35909e-06	88259.3		1119.56	0.119796	9.33996e-07	128262
1124.56	0.124956	1.56226e-06	79984.6		1124.56	0.124878	1.42001e-06	87942		1124.56	0.1248	9.72015e-07	128393
1129.55	0.129882	1.62946e-06	79709.1		1129.55	0.129961	1.46617e-06	88639.7		1129.55	0.129961	1.01025e-06	128641
1134.54	0.134887	1.69194e-06	79722.8		1134.54	0.134887	1.53054e-06	88130		1134.54	0.134887	1.05072e-06	128375
1139.53	0.139813	1.76228e-06	79336		1139.53	0.139891	1.59491e-06	87710.5		1139.53	0.139891	1.0972e-06	127498
1144.52	0.144973	1.82697e-06	79351.6		1144.52	0.144973	1.6395e-06	88425		1144.52	0.144895	1.13896e-06	127217
1149.52	0.149977	1.88695e-06	79481.4		1149.52	0.149977	1.70011e-06	88216.3		1149.52	0.149821	1.17664e-06	127329
1154.51	0.154903	1.95132e-06	79383.8		1154.51	0.154903	1.75883e-06	88071.8		1154.51	0.154903	1.2137e-06	127629
1159.5	0.159907	2.02135e-06	79109.4		1159.5	0.159907	1.82226e-06	87752.2		1159.5	0.159829	1.25389e-06	127467
1164.49	0.164912	2.08792e-06	78983.8		1164.49	0.16499	1.8769e-06	87905.5		1164.49	0.164834	1.29503e-06	127282
1169.48	0.169838	2.14413e-06	79210.6		1169.48	0.169916	1.9306e-06	88012.1		1169.48	0.169916	1.33679e-06	127107
1174.48	0.17492	2.21572e-06	78944.9		1174.48	0.17492	1.99591e-06	87639.2		1174.48	0.174842	1.37165e-06	127468
1179.47	0.179924	2.27162e-06	79205.3		1179.47	0.180002	2.05181e-06	87728.8		1179.47	0.179924	1.41844e-06	126847
1184.46	0.184928	2.33379e-06	79239.4		1184.46	0.184928	2.09671e-06	88199.3		1184.46	0.184928	1.45832e-06	126810
1189.45	0.189933	2.40382e-06	79012.9		1189.45	0.189933	2.15323e-06	88208.1		1189.45	0.189854	1.49192e-06	127255
1194.44	0.194859	2.47541e-06	78717.6		1194.44	0.194859	2.2107e-06	88143.5		1194.44	0.194859	1.53305e-06	127105
1199.44	0.199941	2.54104e-06	78684.6		1199.44	0.199863	2.26722e-06	88153.2		1199.44	0.199941	1.5767e-06	126810
1200.08	0.200254	2.55612e-06	78343		1200.08	0.200254	2.26314e-06	88485		1200.08	0.200254	1.57827e-06	126882
1205.07	0.195015	2.47227e-06	78880.8		1205.07	0.195015	2.20316e-06	88516		1205.07	0.195015	1.5409e-06	126559
1210.06	0.189933	2.40602e-06	78940.7		1210.06	0.190011	2.1479e-06	88463.7		1210.06	0.190011	1.49506e-06	127093
1215.05	0.185007	2.36174e-06	78334.9		1215.05	0.184928	2.09263e-06	88371.4		1215.05	0.185007	1.45769e-06	126918
1220.04	0.180002	2.29894e-06	78298.1		1220.04	0.180081	2.03548e-06	88470.9		1220.04	0.179924	1.41341e-06	127298
1225.04	0.17492	2.21729e-06	78889		1225.04	0.174998	1.97801e-06	88471.8		1225.04	0.17492	1.37385e-06	127321
1230.03	0.169994	2.15889e-06	78741.6		1230.03	0.169994	1.91427e-06	88803.7		1230.03	0.169994	1.34119e-06	126749
1235.02	0.16499	2.10519e-06	78372.9		1235.02	0.16499	1.85963e-06	88721.9		1235.02	0.16499	1.2966e-06	127248
1240.01	0.159986	2.0405e-06	78405.1		1240.01	0.159986	1.80782e-06	88496.7		1240.01	0.159986	1.25012e-06	127976
1245	0.154903	1.97173e-06	78562		1245	0.15506	1.75475e-06	88365.8		1245	0.154981	1.20993e-06	128091
1250	0.149977	1.8926e-06	79244		1250	0.149977	1.7045e-06	87988.8		1250	0.149899	1.17256e-06	127839
1254.99	0.144973	1.8232e-06	79515.6		1254.99	0.144973	1.63605e-06	88611.7		1254.99	0.144973	1.13833e-06	127355
1259.98	0.139969	1.76856e-06	79142.7		1259.98	0.140047	1.57701e-06	88805.2		1259.98	0.139969	1.09626e-06	127679
1264.97	0.134965	1.70827e-06	79006.5		1264.97	0.135043	1.5252e-06	88541		1264.97	0.134965	1.05732e-06	127648
1269.96	0.129961	1.64516e-06	78995.9		1269.96	0.130039	1.46774e-06	88598.1		1269.96	0.129961	1.01869e-06	127576
1274.96	0.124956	1.58078e-06	79047.1		1274.96	0.124956	1.40682e-06	88822		1274.96	0.124956	9.7536e-07	128113
1279.95	0.12003	1.52112e-06	78909.2		1279.95	0.12003	1.35061e-06	88871.3		1279.95	0.12003	9.36736e-07	128137
1284.94	0.114948	1.45204e-06	79163.3		1284.94	0.115026	1.27996e-06	89867.3		1284.94	0.114948	9.01252e-07	127543
1289.93	0.110022	1.39269e-06	78999.8		1289.93	0.110022	1.22814e-06	89584		1289.93	0.109944	8.62314e-07	127499
1294.92	0.105018	1.33302e-06	78781.6		1294.92	0.105096	1.17539e-06	89413.8		1294.92	0.105018	8.22748e-07	127643
1299.92	0.100014	1.26206e-06	79246.5		1299.92	0.100014	1.11101e-06	90020		1299.92	0.0999354	7.84124e-07	127448
1304.91	0.0949312	1.20679e-06	78664.2		1304.91	0.0950094	1.05418e-06	90126.5		1304.91	0.0949312	7.45814e-07	127285
1309.9	0.0900052	1.15278e-06	78076.7		1309.9	0.0900052	9.95457e-07	90416		1309.9	0.089927	7.06562e-07	127274
1314.89	0.0849228	1.08684e-06	78137.7		1314.89	0.085001	9.47413e-07	89719.1		1314.89	0.0849228	6.65426e-07	127622
1319.88	0.0799968	1.01932e-06	78480.4		1319.88	0.0799968	8.90576e-07	89826		1319.88	0.0799186	6.24918e-07	127887
1324.88	0.0749144	9.58403e-07	78165.9		1324.88	0.0749926	8.40333e-07	89241.6		1324.88	0.0749144	5.86294e-07	127776
1329.87	0.0699885	8.90576e-07	78587.9		1329.87	0.0700666	7.79414e-07	89896.5		1329.87	0.0699103	5.461e-07	128017
1334.86	0.0649061	8.26202e-07	78559.5		1334.86	0.0650624	7.22263e-07	90081.4		1334.86	0.0649061	5.08418e-07	127663
1339.85	0.0599801	7.64969e-07	78408.5		1339.85	0.0599801	6.72335e-07	89211.6		1339.85	0.0599801	4.67596e-07	128273
1344.84	0.0549759	7.00282e-07	78505.3		1344.84	0.0550541	6.10474e-07	90182.6		1344.84	0.0549759	4.296e-07	127970
1349.84	0.0499717	6.38421e-07	78273.9		1349.84	0.0499717	5.58661e-07	89449		1349.84	0.0499717	3.92861e-07	127200
1354.83	0.0449675	5.73106e-07	78462.8		1354.83	0.0450457	5.03708e-07	89428.1		1354.83	0.0449675	3.53295e-07	127280
1359.82	0.0399633	5.12815e-07	77929.3		1359.82	0.0400415	4.47499e-07	89478.3		1359.82	0.0399633	3.14043e-07	127254
1364.81	0.0348809	4.51268e-07	77295.4		1364.81	0.0349591	3.90976e-07	89414.9		1364.81	0.0350373	2.74477e-07	127651
1369.8	0.0299549	3.85952e-07	77613		1369.8	0.0300331	3.36652e-07	89211.2		1369.8	0.0299549	2.35539e-07	127176
1374.8	0.0249507	3.25975e-07	76541.8		1374.8	0.0250289	2.82955e-07	88455.5		1374.8	0.0249507	1.96601e-07	126911
1379.79	0.0199465	2.58148e-07	77267.9		1379.79	0.0201029	2.2549e-07	89152.2		1379.79	0.0199465	1.57977e-07	126263
1384.78	0.0149424	1.95973e-07	76247.2		1384.78	0.0149424	1.70537e-07	87619.3		1384.78	0.0149424	1.19039e-07	125525
1389.77	0.0100164	1.30971e-07	76477.5		1389.77	0.0100164	1.14642e-07	87370.4		1389.77	0.00993817	7.97867e-08	124559
1394.76	0.00493397	6.73892e-08	73216.1		1394.76	0.00501217	5.9509e-08	84225.3		1394.76	0.00493397	4.14567e-08	119015
1399.76	-7.02155e-05	3.90016e-09	-18003.2		1399.76	7.97493e-06	3.50812e-09	2273.28		1399.76	7.97493e-06	2.42844e-09	3283.98
1404.75	-0.00499622	-6.00095e-08	83257.1		1404.75	-0.00507441	-5.1649e-08	98248		1404.75	-0.00499622	-3.63903e-08	137295
1409.74	-0.0100004	-1.23652e-07	80875.7		1409.74	-0.00984402	-1.07295e-07	91747.6		1409.74	-0.0100004	-7.52713e-08	132858
1414.73	-0.0150828	-1.86442e-07	80897.9		1414.73	-0.0150828	-1.62613e-07	92752.5		1414.73	-0.0150828	-1.14202e-07	132072
1419.72	-0.0200088	-2.50269e-07	79949.1		1419.72	-0.0200088	-2.20318e-07	90817.8		1419.72	-0.0200088	-1.52504e-07	131202
1424.72	-0.0250912	-3.13123e-07	80132.1		1424.72	-0.0249348	-2.73816e-07	91064.2		1424.72	-0.025013	-1.9178e-07	130426
1429.71	-0.0300954	-3.76698e-07	79892.5		1429.71	-0.0298608	-3.31301e-07	90132		1429.71	-0.0300954	-2.30207e-07	130731
1434.7	-0.0350995	-4.42942e-07	79241.8		1434.7	-0.0350214	-3.85206e-07	90915.8		1434.7	-0.0350995	-2.70111e-07	129945
1439.69	-0.0400255	-5.08904e-07	78650.5		1439.69	-0.0399474	-4.40023e-07	90784.8		1439.69	-0.0401037	-3.08759e-07	129887
1444.68	-0.0450297	-5.74018e-07	78446.5		1444.68	-0.0450297	-4.97099e-07	90585		1444.68	-0.0451079	-3.47595e-07	129772
1449.68	-0.0500339	-6.44532e-07	77628.3		1449.68	-0.0499557	-5.52858e-07	90359.1		1449.68	-0.0500339	-3.87467e-07	129131
1454.67	-0.0550381	-7.03116e-07	78277.5		1454.67	-0.0550381	-6.0849e-07	90450.3		1454.67	-0.0550381	-4.25989e-07	129201
1459.66	-0.0599641	-7.66786e-07	78201.9		1459.66	-0.0598859	-6.645e-07	90121.9		1459.66	-0.0599641	-4.67148e-07	128362
1464.65	-0.0650465	-8.30424e-07	78329.3		1464.65	-0.0649683	-7.1492e-07	90874.9		1464.65	-0.0651247	-5.05168e-07	128917
1469.64	-0.0700507	-8.98458e-07	77967.7		1469.64	-0.0699725	-7.68136e-07	91093.9		1469.64	-0.0701289	-5.43847e-07	128950
1474.64	-0.0751331	-9.59616e-07	78294.9		1474.64	-0.0750549	-8.26814e-07	90776.1		1474.64	-0.0750549	-5.8576e-07	128132
1479.63	-0.0800591	-1.03654e-06	77236.9		1479.63	-0.0799809	-8.82791e-07	90600		1479.63	-0.0800591	-6.24062e-07	128287
1484.62	-0.0851415	-1.09871e-06	77491.8		1484.62	-0.0849851	-9.44201e-07	90007.4		1484.62	-0.0851415	-6.64405e-07	128147
1489.61	-0.0900675	-1.16403e-06	77375.5		1489.61	-0.0900675	-9.9751e-07	90292.3		1489.61	-0.0899893	-7.02802e-07	128044
1494.6	-0.0950716	-1.23186e-06	77177.5		1494.6	-0.0950716	-1.0692e-06	88918.7		1494.6	-0.0950716	-7.39911e-07	128491
1499.6	-0.100076	-1.30094e-06	76925.7		1499.6	-0.0999976	-1.1207e-06	89228.2		1499.6	-0.0999976	-7.82452e-07	127800
1504.59	-0.10508	-1.36751e-06	76840.3		1504.59	-0.105002	-1.17753e-06	89171		1504.59	-0.10508	-8.20597e-07	128053
1509.58	-0.110084	-1.43597e-06	76662		1509.58	-0.110006	-1.23531e-06	89051.2		1509.58	-0.110006	-8.60124e-07	127896
1514.57	-0.115167	-1.5038e-06	76583.9		1514.57	-0.11501	-1.28461e-06	89529.1		1514.57	-0.11501	-9.02822e-07	127390
1519.56	-0.120014	-1.56283e-06	76793		1519.56	-0.120014	-1.34522e-06	89215.6		1519.56	-0.120014	-9.38079e-07	127936
1524.56	-0.125097	-1.63223e-06	76641.7		1524.56	-0.125019	-1.40896e-06	88730.9		1524.56	-0.125097	-9.76098e-07	128160
1529.55	-0.130101	-1.70759e-06	76189.7		1529.55	-0.129945	-1.46266e-06	88841.3		1529.55	-0.130023	-1.02065e-06	127392
1534.54	-0.135027	-1.77134e-06	76228.8		1534.54	-0.134949	-1.51479e-06	89087.7		1534.54	-0.135027	-1.06198e-06	127147
1539.53	-0.140031	-1.8445e-06	75918.1		1539.53	-0.139953	-1.57571e-06	88819.3		1539.53	-0.140031	-1.1006e-06	127232
1544.52	-0.145035	-1.9117e-06	75867.1		1544.52	-0.145035	-1.63097e-06	88925.7		1544.52	-0.145035	-1.14331e-06	126856
1549.52	-0.15004	-1.97513e-06	75964.3		1549.52	-0.15004	-1.69189e-06	88681.6		1549.52	-0.150118	-1.1857e-06	126607
1554.51	-0.155044	-2.05175e-06	75566.5		1554.51	-0.155044	-1.75689e-06	88248.9		1554.51	-0.155122	-1.22652e-06	126473
1559.5	-0.160048	-2.11675e-06	75610.1		1559.5	-0.15997	-1.80368e-06	88690.7		1559.5	-0.160048	-1.26138e-06	126884
1564.49	-0.165052	-2.1849e-06	75542.3		1564.49	-0.165052	-1.87308e-06	88118.1		1564.49	-0.164974	-1.30754e-06	126172
1569.48	-0.170134	-2.25555e-06	75429.3		1569.48	-0.170056	-1.93902e-06	87702.1		1569.48	-0.169978	-1.34836e-06	126063
1574.48	-0.17506	-2.31207e-06	75715.8		1574.48	-0.174982	-2.00088e-06	87452.6		1574.48	-0.17506	-1.38824e-06	126103
1579.47	-0.180065	-2.38116e-06	75620.7		1579.47	-0.179986	-2.04673e-06	87938.6		1579.47	-0.180065	-1.43063e-06	125864
1584.46	-0.185069	-2.46311e-06	75136.1		1584.46	-0.184991	-2.11801e-06	87341.7		1584.46	-0.185147	-1.47177e-06	125799
1589.45	-0.190073	-2.53157e-06	75081.1		1589.45	-0.189995	-2.17642e-06	87297.1		1589.45	-0.190073	-1.51604e-06	125375
1594.44	-0.195077	-2.60945e-06	74758.1		1594.44	-0.194999	-2.23482e-06	87254.8		1594.44	-0.195077	-1.54996e-06	125860
1599.44	-0.200081	-2.6801e-06	74654.5		1599.44	-0.200003	-2.30611e-06	86727.7		1599.44	-0.200081	-1.58827e-06	125975
1600.08	-0.200394	-2.67664e-06	74867.7		1600.08	-0.200394	-2.31647e-06	86508.5		1600.08	-0.200394	-1.59392e-06	125724
1605.07	-0.195077	-2.60317e-06	74938.5		1605.07	-0.195077	-2.22949e-06	87498.7		1605.07	-0.195155	-1.55686e-06	125352
1610.06	-0.190151	-2.54193e-06	74805.8		1610.06	-0.190073	-2.17548e-06	87370.8		1610.06	-0.190229	-1.51636e-06	125452
1615.05	-0.185147	-2.46311e-06	75167.9		1615.05	-0.185069	-2.11142e-06	87651.5		1615.05	-0.185225	-1.46988e-06	126014
1620.05	-0.180221	-2.40502e-06	74935.3		1620.05	-0.180065	-2.05081e-06	87801.7		1620.05	-0.180143	-1.43251e-06	125753
1625.04	-0.175139	-2.32903e-06	75198.1		1625.04	-0.175139	-1.99554e-06	87764.9		1625.04	-0.175217	-1.38887e-06	126158
1630.03	-0.170134	-2.26152e-06	75230.3		1630.03	-0.170056	-1.93023e-06	88101.6		1630.03	-0.170134	-1.35307e-06	125740
1635.02	-0.165209	-2.19683e-06	75203.2		1635.02	-0.165052	-1.87653e-06	87955.9		1635.02	-0.165209	-1.31287e-06	125837
1640.01	-0.160126	-2.13057e-06	75156.4		1640.01	-0.160048	-1.82158e-06	87862.2		1640.01	-0.160126	-1.27519e-06	125570
1645.01	-0.1552	-2.06871e-06	75022.7		1645.01	-0.155122	-1.75721e-06	88277.6		1645.01	-0.1552	-1.23845e-06	125318
1650	-0.150196	-1.97765e-06	75946.8		1650	-0.150118	-1.69849e-06	88383.3		1650	-0.150118	-1.19512e-06	125609
1654.99	-0.145192	-1.9095e-06	76036.4		1654.99	-0.145192	-1.64102e-06	88476.5		1654.99	-0.145192	-1.15461e-06	125750
1659.98	-0.140109	-1.85173e-06	75664.2		1659.98	-0.140109	-1.58607e-06	88337.6		1659.98	-0.140109	-1.11285e-06	125902
1664.97	-0.135105	-1.78201e-06	75816		1664.97	-0.135183	-1.52609e-06	88581.5		1664.97	-0.135183	-1.07673e-06	125549
1669.97	-0.130179	-1.71544e-06	75886.7		1669.97	-0.130101	-1.4614e-06	89024.7		1669.97	-0.130101	-1.0356e-06	125629
1674.96	-0.125097	-1.64856e-06	75882.6		1674.96	-0.125097	-1.403e-06	89164		1674.96	-0.125175	-9.94462e-07	125872
1679.95	-0.120171	-1.57445e-06	76325.6		1679.95	-0.120093	-1.34647e-06	89190.5		1679.95	-0.120093	-9.56466e-07	125559
1684.94	-0.115167	-1.51102e-06	76217.9		1684.94	-0.115088	-1.29089e-06	89154.1		1684.94	-0.115088	-9.17214e-07	125476
1689.93	-0.110084	-1.44382e-06	76245.2		1689.93	-0.110084	-1.23751e-06	88956.2		1689.93	-0.110162	-8.71367e-07	126425
1694.93	-0.105236	-1.38321e-06	76081.1		1694.93	-0.10508	-1.17848e-06	89166.1		1694.93	-0.105236	-8.32429e-07	126421
1699.92	-0.100154	-1.3179e-06	75995.3		1699.92	-0.100154	-1.12352e-06	89142.9		1699.92	-0.100076	-7.93491e-07	126121
1704.91	-0.0951498	-1.23688e-06	76927.2		1704.91	-0.0951498	-1.06103e-06	89676.6		1704.91	-0.0951498	-7.55496e-07	125944
1709.9	-0.0901456	-1.17596e-06	76656.9		1709.9	-0.0901456	-1.01048e-06	89211		1709.9	-0.0901456	-7.14359e-07	126191
1714.89	-0.0852196	-1.1141e-06	76491.8		1714.89	-0.0851415	-9.54896e-07	89163.1		1714.89	-0.0850633	-6.74794e-07	126058
1719.89	-0.0801373	-1.04533e-06	76662		1719.89	-0.0801373	-8.92721e-07	89767.5		1719.89	-0.0800591	-6.33029e-07	126470
1724.88	-0.0751331	-9.74051e-07	77134.7		1724.88	-0.0750549	-8.4185e-07	89154.7		1724.88	-0.0752113	-5.93463e-07	126733
1729.87	-0.0701289	-9.12818e-07	76826.8		1729.87	-0.0701289	-7.82815e-07	89585.5		1729.87	-0.0701289	-5.55467e-07	126252
1734.86	-0.0652029	-8.49386e-07	76764.7		1734.86	-0.0651247	-7.24408e-07	89900.6		1734.86	-0.0651247	-5.11505e-07	127320
1739.85	-0.0601987	-7.79675e-07	77210		1739.85	-0.0600423	-6.69455e-07	89688.3		1739.85	-0.0600423	-4.72881e-07	126971
1744.85	-0.0551945	-7.16872e-07	76993.6		1744.85	-0.0551163	-6.1199e-07	90060.8		1744.85	-0.0551163	-4.33315e-07	127197
1749.84	-0.0501121	-6.48416e-07	77283.9		1749.84	-0.0501121	-5.57666e-07	89860.5		1749.84	-0.0501903	-3.94377e-07	127265
1754.83	-0.0451861	-5.82473e-07	77576.4		1754.83	-0.0451861	-5.01457e-07	90109.7		1754.83	-0.0451079	-3.53869e-07	127471
1759.82	-0.0401037	-5.16215e-07	77688		1759.82	-0.0401037	-4.43364e-07	90453.3		1759.82	-0.0401037	-3.14303e-07	127596
1764.81	-0.0350995	-4.52156e-07	77627		1764.81	-0.0350995	-3.84643e-07	91252.3		1764.81	-0.0350995	-2.74423e-07	127903
1769.81	-0.0301735	-3.87469e-07	77873.5		1769.81	-0.0300954	-3.33458e-07	90252.3		1769.81	-0.0302517	-2.35799e-07	128294
1774.8	-0.0250912	-3.23724e-07	77508		1774.8	-0.0250912	-2.75365e-07	91119.6		1774.8	-0.0251694	-1.95919e-07	128468
1779.79	-0.0201652	-2.58094e-07	78131		1779.79	-0.020087	-2.20727e-07	91003.9		1779.79	-0.020087	-1.56667e-07	128214
1784.78	-0.0150828	-1.92779e-07	78238.7		1784.78	-0.0150046	-1.63576e-07	91728.8		1784.78	-0.015161	-1.17415e-07	129123
1789.77	-0.0100786	-1.26836e-07	79461.8		1789.77	-0.0100786	-1.09251e-07	92251.9		1789.77	-0.0101568	-7.66527e-08	132504
1794.77	-0.00507441	-6.1426e-08	82610.1		1794.77	-0.00499622	-5.21329e-08	95836.1		1794.77	-0.0051526	-3.73771e-08	137854
1799.76	-0.000148406	2.88271e-09	-51481.4		1799.76	-0.000148406	2.40666e-09	-61664.8		1799.76	-0.000148406	1.74391e-09	-85099.5
1804.75	0.00485578	6.77196e-08	71704.3		1804.75	0.00501217	5.77816e-08	86743.3		1804.75	0.00485578	4.12503e-08	117715
1809.74	0.00985997	1.31813e-07	74803		1809.74	0.00985997	1.11751e-07	88231.7		1809.74	0.00985997	8.03988e-08	122638
1814.73	0.0148642	1.96801e-07	75528.9		1814.73	0.0149424	1.66693e-07	89640.1		1814.73	0.0148642	1.19349e-07	124544
1819.73	0.0199465	2.61601e-07	76248		1819.73	0.0198684	2.21132e-07	89848.3		1819.73	0.0199465	1.58875e-07	125548
1824.72	0.0248725	3.25867e-07	76327.2		1824.72	0.0249507	2.7507e-07	90707		1824.72	0.0248725	1.9881e-07	125107
1829.71	0.0298767	3.93462e-07	75933.1		1829.71	0.0299549	3.30608e-07	90605.6		1829.71	0.0298767	2.38463e-07	125289
1834.7	0.0348027	4.57225e-07	76117.2		1834.7	0.0348809	3.86303e-07	90294.1		1834.7	0.0348027	2.76357e-07	125934
1839.69	0.0398851	5.15307e-07	77400.7		1839.69	0.0398851	4.40209e-07	90604.9		1839.69	0.0398851	3.15758e-07	126315
1844.69	0.0448111	5.78412e-07	77472.7		1844.69	0.0448893	4.9355e-07	90951.9		1844.69	0.0448111	3.55693e-07	125983
1849.68	0.0498153	6.4475e-07	77263		1849.68	0.0499717	5.47487e-07	91274.6		1849.68	0.0498153	3.97103e-07	125447
1854.67	0.0548977	7.13066e-07	76988.2		1854.67	0.0548977	6.04124e-07	90871.5		1854.67	0.0548977	4.36818e-07	125676
1859.66	0.0599019	7.76736e-07	77120		1859.66	0.0599801	6.5869e-07	91059.7		1859.66	0.0599019	4.74242e-07	126311
1864.65	0.0648279	8.46936e-07	76544		1864.65	0.0648279	7.11779e-07	91078.7		1864.65	0.0648279	5.16186e-07	125590
1869.65	0.0698321	9.12333e-07	76542.3		1869.65	0.0699103	7.65999e-07	91266.8		1869.65	0.0699103	5.52448e-07	126546
1874.64	0.0748363	9.77918e-07	76526.1		1874.64	0.0749144	8.22479e-07	91083.7		1874.64	0.0747581	5.92257e-07	126226
1879.63	0.0798405	1.0501e-06	76031.6		1879.63	0.0798405	8.73779e-07	91373.7		1879.63	0.0798405	6.33762e-07	125979
1884.62	0.0848446	1.12452e-06	75449.8		1884.62	0.0850792	9.27371e-07	91742.4		1884.62	0.0849228	6.73948e-07	126008
1889.61	0.089927	1.18669e-06	75779.5		1889.61	0.089927	9.7977e-07	91783.8		1889.61	0.089927	7.11905e-07	126319
1894.61	0.094853	1.24855e-06	75970.3		1894.61	0.0949312	1.03188e-06	91998		1894.61	0.094853	7.50992e-07	126304
1899.6	0.0998572	1.31199e-06	76111.5		1899.6	0.0998572	1.09469e-06	91219.9		1899.6	0.0998572	7.92465e-07	126008
1904.59	0.104861	1.37573e-06	76222.4		1904.59	0.105018	1.14367e-06	91825		1904.59	0.104861	8.30297e-07	126294
1909.58	0.109866	1.44795e-06	75876.4		1909.58	0.109944	1.20396e-06	91318.2		1909.58	0.109787	8.68097e-07	126469
1914.57	0.11487	1.51641e-06	75751.2		1914.57	0.11487	1.25923e-06	91222.2		1914.57	0.11487	9.06776e-07	126679
1919.57	0.119874	1.57764e-06	75983		1919.57	0.119952	1.3123e-06	91406.1		1919.57	0.119874	9.45675e-07	126760
1924.56	0.124878	1.63479e-06	76387.7		1924.56	0.124878	1.37416e-06	90876		1924.56	0.124956	9.91637e-07	126010
1929.55	0.129882	1.70482e-06	76185.4		1929.55	0.129882	1.43477e-06	90525.2		1929.55	0.129961	1.03408e-06	125677
1934.54	0.134887	1.76825e-06	76282.5		1934.54	0.134887	1.48783e-06	90659.7		1934.54	0.134887	1.0749e-06	125487
1939.53	0.139891	1.83702e-06	76150.9		1939.53	0.139813	1.54718e-06	90365.9		1939.53	0.139813	1.11635e-06	125240
1944.53	0.144895	1.91427e-06	75692.1		1944.53	0.144895	1.59743e-06	90705.3		1944.53	0.144817	1.15655e-06	125215
1949.52	0.149821	1.9777e-06	75755.2		1949.52	0.149821	1.65615e-06	90463.6		1949.52	0.149899	1.20082e-06	124830
1954.51	0.154903	2.04458e-06	75762.7		1954.51	0.154903	1.70576e-06	90811.8		1954.51	0.154825	1.2338e-06	125487
1959.5	0.159829	2.1099e-06	75752.1		1959.5	0.159907	1.76668e-06	90513		1959.5	0.159907	1.27933e-06	124993
1964.49	0.164912	2.16988e-06	76000.5		1964.49	0.164912	1.80625e-06	91300.8		1964.49	0.164834	1.32486e-06	124416
1969.49	0.169916	2.24116e-06	75816.1		1969.49	0.169916	1.86214e-06	91247.6		1969.49	0.169916	1.36914e-06	124104
1974.48	0.17492	2.3071e-06	75818.1		1974.48	0.17492	1.9262e-06	90810.9		1974.48	0.17492	1.41121e-06	123950
1979.47	0.179924	2.36676e-06	76021.2		1979.47	0.179924	1.98775e-06	90516.7		1979.47	0.179924	1.45486e-06	123671
1984.46	0.18485	2.43239e-06	75995.2		1984.46	0.184928	2.04082e-06	90615		1984.46	0.18485	1.49129e-06	123953
1989.45	0.189854	2.49645e-06	76049.7		1989.45	0.189933	2.10331e-06	90302		1989.45	0.189933	1.53525e-06	123714
1994.45	0.194937	2.57056e-06	75834.4		1994.45	0.194859	2.15449e-06	90443.1		1994.45	0.194937	1.58518e-06	122975
1999.44	0.199863	2.63117e-06	75959.8		1999.44	0.199941	2.21384e-06	90314.2		1999.44	0.199941	1.60465e-06	124601
2000.08	0.200176	2.64121e-06	75789.2		2000.08	0.200254	2.22075e-06	90174.1		2000.08	0.200176	1.61438e-06	123995
2005.07	0.195015	2.58124e-06	75551		2005.07	0.194937	2.15637e-06	90400.3		2005.07	0.194937	1.57607e-06	123685
2010.06	0.190011	2.50807e-06	75759.7		2010.06	0.189933	2.10111e-06	90396.5		2010.06	0.190011	1.53368e-06	123892
2015.05	0.184928	2.42831e-06	76155.2		2015.05	0.185007	2.03359e-06	90975.2		2015.05	0.185007	1.48658e-06	124451
2020.04	0.179924	2.363e-06	76142.4		2020.04	0.180002	1.98084e-06	90871.8		2020.04	0.180002	1.45329e-06	123858
2025.04	0.174998	2.28952e-06	76434.6		2025.04	0.174998	1.92589e-06	90866.4		2025.04	0.174998	1.40117e-06	124895
2030.03	0.169916	2.23488e-06	76029.2		2030.03	0.169994	1.87125e-06	90845.3		2030.03	0.169994	1.36003e-06	124993
2035.02	0.164912	2.17396e-06	75857.8		2035.02	0.16499	1.81943e-06	90681.9		2035.02	0.16499	1.32266e-06	124741
2040.01	0.159907	2.10142e-06	76094.9		2040.01	0.159986	1.75789e-06	91010.2		2040.01	0.159986	1.28467e-06	124535
2045	0.154981	2.03485e-06	76163.6		2045	0.154903	1.70325e-06	90945.8		2045	0.154903	1.24353e-06	124567
2050	0.149977	1.9777e-06	75834.3		2050	0.150055	1.65395e-06	90725.6		2050	0.149899	1.20396e-06	124505
2054.99	0.144973	1.9149e-06	75708.1		2054.99	0.144973	1.58958e-06	91202.4		2054.99	0.144973	1.16189e-06	124774
2059.98	0.139969	1.83105e-06	76441.8		2059.98	0.140047	1.53745e-06	91090.6		2059.98	0.139891	1.12326e-06	124540
2064.97	0.134965	1.77233e-06	76150.9		2064.97	0.135043	1.47873e-06	91323.7		2064.97	0.134965	1.08244e-06	124686
2069.96	0.129882	1.70388e-06	76227.5		2069.96	0.129961	1.42001e-06	91521.1		2069.96	0.130039	1.03628e-06	125486
2074.96	0.124956	1.63825e-06	76274.4		2074.96	0.124956	1.3638e-06	91623.8		2074.96	0.124956	9.99225e-07	125053
2079.95	0.119952	1.56634e-06	76581.3		2079.95	0.12003	1.31356e-06	91378.2		2079.95	0.119874	9.56833e-07	125282
2084.94	0.11487	1.50102e-06	76527.7		2084.94	0.115026	1.25421e-06	91712.3		2084.94	0.114948	9.18523e-07	125144
2089.93	0.109944	1.43257e-06	76746		2089.93	0.109944	1.20365e-06	91342		2089.93	0.109944	8.78329e-07	125174
2094.92	0.10494	1.37196e-06	76488.7		2094.92	0.10494	1.1487e-06	91355.3		2094.92	0.104861	8.36565e-07	125348
2099.92	0.0999354	1.30413e-06	76629.7		2099.92	0.100092	1.0928e-06	91591.9		2099.92	0.0999354	7.95429e-07	125637
2104.91	0.0949312	1.23442e-06	76903.3		2104.91	0.0950094	1.0344e-06	91850.2		2104.91	0.0949312	7.55863e-07	125593
2109.9	0.089927	1.17099e-06	76795.6		2109.9	0.089927	9.82582e-07	91521.1		2109.9	0.089927	7.18181e-07	125215
2114.89	0.085001	1.10693e-06	76789.7		2114.89	0.085001	9.31398e-07	91261.8		2114.89	0.0849228	6.77045e-07	125432
2119.88	0.0799968	1.0413e-06	76823.8		2119.88	0.0799968	8.71421e-07	91800.5		2119.88	0.0799186	6.36851e-07	125490
2124.88	0.0749144	9.77872e-07	76609.6		2124.88	0.0749926	8.19608e-07	91498.2		2124.88	0.0749144	5.96971e-07	125491
2129.87	0.0699103	9.13813e-07	76503.9		2129.87	0.0699885	7.65911e-07	91379.3		2129.87	0.0699885	5.55835e-07	125916
2134.86	0.0649061	8.4944e-07	76410.4		2134.86	0.0649843	7.07819e-07	91809.2		2134.86	0.0649061	5.16583e-07	125645
2139.85	0.0599019	7.8224e-07	76577.3		2139.85	0.0599801	6.5161e-07	92049.1		2139.85	0.0599801	4.77331e-07	125657
2144.84	0.0549759	7.19437e-07	76415.1		2144.84	0.0549759	6.01681e-07	91370.5		2144.84	0.0548977	4.39963e-07	124778
2149.84	0.0498935	6.56948e-07	75947.4		2149.84	0.0500499	5.45786e-07	91702.3		2149.84	0.0498935	3.97885e-07	125397
2154.83	0.0449675	5.91005e-07	76086.5		2154.83	0.0449675	4.89263e-07	91908.6		2154.83	0.0448893	3.58319e-07	125278
2159.82	0.0398851	5.29772e-07	75287.4		2159.82	0.0399633	4.35567e-07	91750.1		2159.82	0.0399633	3.19695e-07	125005
2164.81	0.0349591	4.60688e-07	75884.6		2164.81	0.0349591	3.81556e-07	91622.5		2164.81	0.0348809	2.78559e-07	125219
2169.8	0.0299549	3.93803e-07	76065.8		2169.8	0.0299549	3.30371e-07	90670.5		2169.8	0.0299549	2.40249e-07	124683
2174.8	0.0249507	3.30685e-07	75451.6		2174.8	0.0250289	2.72906e-07	91712.5		2174.8	0.0250289	1.99741e-07	125307
2179.79	0.0199465	2.65056e-07	75254.1		2179.79	0.0199465	2.21094e-07	90217.5		2179.79	0.0199465	1.60489e-07	124286
2184.78	0.0150205	1.99427e-07	75318.6		2184.78	0.0149424	1.66455e-07	89768.1		2184.78	0.0150205	1.20609e-07	124539
2189.77	0.00993817	1.33483e-07	74452.4		2189.77	0.0100164	1.11188e-07	90084.6		2189.77	0.0100164	8.13568e-08	123116
2194.76	0.00509036	6.94242e-08	73322.5		2194.76	0.00493397	5.73741e-08	85996.5		2194.76	0.00493397	4.20218e-08	117415
2199.76	-7.02155e-05	3.88772e-09	-18060.9		2199.76	7.97493e-06	3.14719e-09	2533.99		2199.76	-7.02155e-05	2.32887e-09	-30150.1
2204.75	-0.00507441	-6.1279e-08	82808.3		2204.75	-0.00499622	-5.0644e-08	98653.7		2204.75	-0.00507441	-3.73393e-08	135900
2209.74	-0.0100786	-1.26006e-07	79984.9		2209.74	-0.0100004	-1.04532e-07	95668.6		2209.74	-0.0100004	-7.69204e-08	130010
2214.73	-0.0150828	-1.91403e-07	78801.3		2214.73	-0.0150046	-1.58877e-07	94441.5		2214.73	-0.0150828	-1.16556e-07	129404
2219.72	-0.020087	-2.56014e-07	78460.3		2219.72	-0.0200088	-2.13474e-07	93729.5		2219.72	-0.020087	-1.55675e-07	129032
2224.72	-0.025013	-3.23546e-07	77308.9		2224.72	-0.0250912	-2.67474e-07	93808		2224.72	-0.0251694	-1.95704e-07	128609
2229.71	-0.0300172	-3.8596e-07	77772.8		2229.71	-0.0300172	-3.20971e-07	93519.7		2229.71	-0.0300172	-2.35293e-07	127573
2234.7	-0.0350995	-4.54339e-07	77254.1		2234.7	-0.0350214	-3.73308e-07	93813.7		2234.7	-0.0350995	-2.75762e-07	127282
2239.69	-0.0400255	-5.18856e-07	77141.9		2239.69	-0.0400255	-4.29945e-07	93094.6		2239.69	-0.0401037	-3.14755e-07	127412
2244.68	-0.0450297	-5.87204e-07	76685		2244.68	-0.0450297	-4.82249e-07	93374.4		2244.68	-0.0450297	-3.55946e-07	126507
2249.68	-0.0500339	-6.51376e-07	76812.6		2249.68	-0.0499557	-5.36752e-07	93070.5		2249.68	-0.0499557	-3.97325e-07	125730
2254.67	-0.0551163	-7.14261e-07	77165.5		2254.67	-0.0550381	-5.88962e-07	93449.3		2254.67	-0.0550381	-4.37323e-07	125852
2259.66	-0.0600423	-7.84493e-07	76536.5		2259.66	-0.0599641	-6.4764e-07	92588.6		2259.66	-0.0600423	-4.77258e-07	125807
2264.65	-0.0651247	-8.49136e-07	76695.3		2264.65	-0.0648901	-6.98846e-07	92853.2		2264.65	-0.0650465	-5.17538e-07	125685
2269.64	-0.0700507	-9.12303e-07	76784.4		2269.64	-0.0700507	-7.52658e-07	93071.1		2269.64	-0.0701289	-5.58446e-07	125579
2274.64	-0.0751331	-9.84826e-07	76290.7		2274.64	-0.0749767	-8.08918e-07	92687.6		2274.64	-0.0750549	-5.98789e-07	125344
2279.63	-0.0801373	-1.05507e-06	75954.7		2279.63	-0.0800591	-8.6003e-07	93088.7		2279.63	-0.0800591	-6.37374e-07	125608
2284.62	-0.0850633	-1.11473e-06	76308.4		2284.62	-0.0849851	-9.17483e-07	92628.5		2284.62	-0.0850633	-6.84153e-07	124334
2289.61	-0.0900675	-1.18036e-06	76305.1		2289.61	-0.0900675	-9.68689e-07	92978.7		2289.61	-0.0901456	-7.23491e-07	124598
2294.6	-0.0950716	-1.24976e-06	76072.1		2294.6	-0.0950716	-1.03905e-06	91498.5		2294.6	-0.0951498	-7.61888e-07	124887
2299.6	-0.100076	-1.32072e-06	75773.5		2299.6	-0.100076	-1.09118e-06	91713.5		2299.6	-0.100076	-8.04177e-07	124445
2304.59	-0.105002	-1.38227e-06	75963.3		2304.59	-0.10508	-1.14645e-06	91657.2		2304.59	-0.10508	-8.40376e-07	125039
2309.58	-0.110006	-1.45104e-06	75811.8		2309.58	-0.110006	-1.20799e-06	91065.2		2309.58	-0.110084	-8.86308e-07	124205
2314.57	-0.115088	-1.52358e-06	75538.2		2314.57	-0.11501	-1.26106e-06	91201.1		2314.57	-0.115088	-9.20529e-07	125024
2319.56	-0.120093	-1.59298e-06	75388.8		2319.56	-0.120014	-1.31287e-06	91413.5		2319.56	-0.120014	-9.62316e-07	124714
2324.56	-0.125097	-1.66363e-06	75195.1		2324.56	-0.125019	-1.36845e-06	91357.5		2324.56	-0.125097	-1.00495e-06	124481
2329.55	-0.130101	-1.72769e-06	75303.5		2329.55	-0.129945	-1.41901e-06	91574		2329.55	-0.130179	-1.05318e-06	123605
2334.54	-0.135105	-1.80839e-06	74710.2		2334.54	-0.135027	-1.47773e-06	91374.5		2334.54	-0.135105	-1.09306e-06	123602
2339.53	-0.140031	-1.86743e-06	74986.2		2339.53	-0.140031	-1.5374e-06	91083.4		2339.53	-0.140031	-1.13231e-06	123668
2344.52	-0.145035	-1.94813e-06	74448.6		2344.52	-0.145035	-1.59015e-06	91208.6		2344.52	-0.145114	-1.18005e-06	122973
2349.52	-0.15004	-2.00748e-06	74740.4		2349.52	-0.15004	-1.65013e-06	90926.1		2349.52	-0.15004	-1.21804e-06	123181
2354.51	-0.155122	-2.08221e-06	74498.6		2354.51	-0.155044	-1.69346e-06	91554.4		2354.51	-0.155122	-1.26106e-06	123009
2359.5	-0.160126	-2.14721e-06	74573.9		2359.5	-0.160048	-1.77134e-06	90354.3		2359.5	-0.160126	-1.30471e-06	122729
2364.49	-0.165052	-2.2097e-06	74694.3		2364.49	-0.164974	-1.81718e-06	90785.5		2364.49	-0.165052	-1.34585e-06	122638
2369.48	-0.170056	-2.28821e-06	74318.6		2369.48	-0.170056	-1.8781e-06	90546.9		2369.48	-0.170056	-1.39106e-06	122249
2374.48	-0.175139	-2.35949e-06	74227.4		2374.48	-0.17506	-1.92332e-06	91019.9		2374.48	-0.17506	-1.43032e-06	122393
2379.47	-0.180065	-2.42543e-06	74240.3		2379.47	-0.179986	-1.98801e-06	90536.1		2379.47	-0.180143	-1.47302e-06	122295
2384.46	-0.185147	-2.5077e-06	73831.3		2384.46	-0.184913	-2.03071e-06	91057.9		2384.46	-0.185069	-1.51322e-06	122302
2389.45	-0.190073	-2.57208e-06	73898.7		2389.45	-0.189995	-2.10953e-06	90064.9		2389.45	-0.190073	-1.55906e-06	121915
2394.44	-0.194999	-2.6509e-06	73559.7		2394.44	-0.194999	-2.17328e-06	89725.8		2394.44	-0.195155	-1.59894e-06	122053
2399.44	-0.20016	-2.71747e-06	73656.7		2399.44	-0.200003	-2.22164e-06	90025.2		2399.44	-0.20016	-1.64322e-06	121810
2400.08	-0.200472	-2.73066e-06	73415.5		2400.08	-0.200316	-2.22666e-06	89962.6		2400.08	-0.200394	-1.64667e-06	121696
2405.07	-0.195234	-2.65718e-06	73474.1		2405.07	-0.195077	-2.17296e-06	89774.8		2405.07	-0.195234	-1.60585e-06	121576
2410.06	-0.190229	-2.57773e-06	73797.3		2410.06	-0.190073	-2.10514e-06	90290.2		2410.06	-0.190229	-1.55938e-06	121991
2415.05	-0.185147	-2.50268e-06	73979.5		2415.05	-0.185147	-2.06023e-06	89867.1		2415.05	-0.185225	-1.52326e-06	121598
2420.04	-0.180143	-2.45275e-06	73445.2		2420.04	-0.180143	-1.99115e-06	90471.9		2420.04	-0.180221	-1.47459e-06	122218
2425.04	-0.175139	-2.37079e-06	73873.5		2425.04	-0.175139	-1.93965e-06	90294		2425.04	-0.175139	-1.44099e-06	121540
2430.03	-0.170213	-2.29323e-06	74223.9		2430.03	-0.170056	-1.88187e-06	90365.6		2430.03	-0.170213	-1.39452e-06	122058
2435.02	-0.16513	-2.2433e-06	73610.3		2435.02	-0.165052	-1.82378e-06	90500.1		2435.02	-0.165209	-1.35589e-06	121845
2440.01	-0.160126	-2.17234e-06	73711.5		2440.01	-0.160048	-1.7682e-06	90514.8		2440.01	-0.160204	-1.31413e-06	121909
2445	-0.1552	-2.09791e-06	73978.3		2445	-0.155044	-1.70728e-06	90813.4		2445	-0.155122	-1.26985e-06	122157
2450	-0.150118	-2.01878e-06	74360.6		2450	-0.150118	-1.65923e-06	90474.2		2450	-0.150196	-1.22966e-06	122144
2454.99	-0.145114	-1.95535e-06	74213.6		2454.99	-0.145114	-1.60805e-06	90242		2454.99	-0.145192	-1.17973e-06	123072
2459.98	-0.140109	-1.88501e-06	74328.1		2459.98	-0.140109	-1.55058e-06	90359.1		2459.98	-0.140109	-1.14142e-06	122750
2464.97	-0.135262	-1.82127e-06	74267.9		2464.97	-0.135105	-1.48684e-06	90867.4		2464.97	-0.135183	-1.10123e-06	122757
2469.96	-0.130179	-1.75312e-06	74255.5		2469.96	-0.130101	-1.42686e-06	91179.8		2469.96	-0.130101	-1.05978e-06	122763
2474.96	-0.125097	-1.68404e-06	74283.7		2474.96	-0.125097	-1.36626e-06	91561.7		2474.96	-0.125097	-1.02084e-06	122543
2479.95	-0.120171	-1.60742e-06	74760		2479.95	-0.120093	-1.30911e-06	91736.4		2479.95	-0.120171	-9.81273e-07	122464
2484.94	-0.115245	-1.54022e-06	74823.5		2484.94	-0.115088	-1.25227e-06	91903.9		2484.94	-0.115167	-9.36997e-07	122910
2489.93	-0.110084	-1.48307e-06	74227.2		2489.93	-0.110084	-1.20234e-06	91558.3		2489.93	-0.110162	-9.01827e-07	122155
2494.92	-0.105158	-1.42121e-06	73992.1		2494.92	-0.10508	-1.14174e-06	92035.4		2494.92	-0.105158	-8.62889e-07	121868
2499.92	-0.100232	-1.3537e-06	74043.4		2499.92	-0.100076	-1.09024e-06	91792.8		2499.92	-0.100154	-8.14531e-07	122959
2504.91	-0.0951498	-1.28116e-06	74268.6		2504.91	-0.0950716	-1.03057e-06	92251.2		2504.91	-0.095228	-7.78419e-07	122335
2509.9	-0.0901456	-1.21396e-06	74257.6		2509.9	-0.0901456	-9.79075e-07	92072.3		2509.9	-0.0901456	-7.35085e-07	122633
2514.89	-0.0851415	-1.14268e-06	74510.5		2514.89	-0.0850633	-9.23808e-07	92078.9		2514.89	-0.0851415	-6.99601e-07	121700
2519.88	-0.0802155	-1.07893e-06	74347.1		2519.88	-0.0801373	-8.67599e-07	92366.7		2519.88	-0.0802155	-6.56267e-07	122230
2524.88	-0.0751331	-1.00702e-06	74609.1		2524.88	-0.0750549	-8.0825e-07	92860.9		2524.88	-0.0752113	-6.1199e-07	122896
2529.87	-0.0701289	-9.41707e-07	74470		2529.87	-0.0701289	-7.54868e-07	92902.2		2529.87	-0.0701289	-5.72424e-07	122512
2534.86	-0.0651247	-8.74508e-07	74470.1		2534.86	-0.0650465	-6.99287e-07	93018.4		2534.86	-0.0651247	-5.30974e-07	122651
2539.85	-0.0601205	-8.08878e-07	74325.8		2539.85	-0.0600423	-6.44334e-07	93185.1		2539.85	-0.0600423	-4.89524e-07	122654
2544.84	-0.0551163	-7.39795e-07	74502.2		2544.84	-0.0551163	-5.93463e-07	92872.3		2544.84	-0.0551163	-4.51528e-07	122066
2549.84	-0.0501121	-6.71025e-07	74679.9		2549.84	-0.0501121	-5.3537e-07	93602.7		2549.84	-0.0501903	-4.06624e-07	123432
2554.83	-0.0451861	-6.0257e-07	74989		2554.83	-0.0451079	-4.85756e-07	92861.3		2554.83	-0.0451861	-3.66116e-07	123420
2559.82	-0.0401819	-5.37255e-07	74791.2		2559.82	-0.0401037	-4.29861e-07	93294.6		2559.82	-0.0401037	-3.25294e-07	123285
2564.81	-0.0351777	-4.70683e-07	74737.6		2564.81	-0.0350995	-3.72396e-07	94253.2		2564.81	-0.0351777	-2.84786e-07	123524
2569.8	-0.0300954	-4.01286e-07	74997.3		2569.8	-0.0300954	-3.19956e-07	94061.1		2569.8	-0.0300954	-2.4365e-07	123519
2574.8	-0.0250912	-3.3597e-07	74682.7		2574.8	-0.0250912	-2.67515e-07	93793.5		2574.8	-0.0250912	-2.03142e-07	123516
2579.79	-0.0201652	-2.67829e-07	75291.2		2579.79	-0.0201652	-2.11934e-07	95148.3		2579.79	-0.0201652	-1.6232e-07	124231
2584.78	-0.015161	-2.00001e-07	75804.3		2584.78	-0.015161	-1.60121e-07	94684.2		2584.78	-0.015161	-1.21497e-07	124784
2589.77	-0.0101568	-1.33116e-07	76300.2		2589.77	-0.0100786	-1.04855e-07	96119.7		2589.77	-0.0101568	-7.95097e-08	127743
2594.76	-0.0051526	-6.3969e-08	80548.4		2594.76	-0.00507441	-5.06887e-08	100109		2594.76	-0.0051526	-3.86329e-08	133373
2599.76	-0.000148406	2.88271e-09	-51481.4		2599.76	-7.02155e-05	2.30398e-09	-30475.8		2599.76	-0.000148406	1.75325e-09	-84646.4
2604.75	0.00485578	6.99132e-08	69454.5		2604.75	0.00485578	5.6036e-08	86654.7		2604.75	0.00493397	4.26598e-08	115659
2609.74	0.00985997	1.3693e-07	72007.4		2609.74	0.00985997	1.1015e-07	89514.3		2609.74	0.00985997	8.29067e-08	118929
2614.73	0.014786	2.0421e-07	72405.6		2614.73	0.0149424	1.63176e-07	91571.7		2614.73	0.014786	1.23304e-07	119914
2619.72	0.0198684	2.708e-07	73369.2		2619.72	0.0198684	2.17271e-07	91445.2		2619.72	0.0197902	1.63365e-07	121141
2624.72	0.0248725	3.38802e-07	73413.2		2624.72	0.0248725	2.69104e-07	92427.1		2624.72	0.0248725	2.04179e-07	121817
2629.71	0.0298767	4.02974e-07	74140.6		2629.71	0.0299549	3.21849e-07	93071.5		2629.71	0.0297985	2.46468e-07	120902
2634.7	0.0348809	4.70443e-07	74144.9		2634.7	0.0348027	3.74059e-07	93040.7		2634.7	0.0348809	2.85242e-07	122286
2639.69	0.0398851	5.37503e-07	74204.4		2639.69	0.0399633	4.27337e-07	93517.1		2639.69	0.0398851	3.2593e-07	122373
2644.68	0.0448893	6.07484e-07	73893.9		2644.68	0.0449675	4.82907e-07	93118.4		2644.68	0.0448111	3.66085e-07	122406
2649.68	0.0498935	6.75549e-07	73856.2		2649.68	0.0498935	5.35055e-07	93249.4		2649.68	0.0498153	4.09567e-07	121629
2654.67	0.0548977	7.41008e-07	74085.1		2654.67	0.0548977	5.86669e-07	93575.3		2654.67	0.0548195	4.46865e-07	122676
2659.66	0.0598237	8.04301e-07	74379.7		2659.66	0.0599019	6.38534e-07	93811.6		2659.66	0.0598237	4.90002e-07	122089
2664.65	0.0649061	8.69572e-07	74641.4		2664.65	0.0649061	6.94512e-07	93455.7		2664.65	0.0649061	5.30471e-07	122356
2669.64	0.0698321	9.36978e-07	74529		2669.64	0.0699103	7.48669e-07	93379.4		2669.64	0.0698321	5.74487e-07	121555
2674.64	0.0747581	1.0003e-06	74735.5		2674.64	0.0749144	7.9887e-07	93775.5		2674.64	0.0749144	6.12444e-07	122320
2679.63	0.0798405	1.06862e-06	74713.4		2679.63	0.0797623	8.52682e-07	93542.8		2679.63	0.0798405	6.49208e-07	122981
2684.62	0.0848446	1.1465e-06	74003.3		2684.62	0.0849228	9.04735e-07	93864.9		2684.62	0.0848446	6.91874e-07	122630
2689.61	0.0898488	1.21213e-06	74124.9		2689.61	0.089927	9.59049e-07	93766.9		2689.61	0.0898488	7.27163e-07	123561
2694.6	0.094853	1.27242e-06	74545.4		2694.6	0.0949312	1.01148e-06	93853.8		2694.6	0.0947748	7.73031e-07	122602
2699.6	0.0998572	1.34056e-06	74489.1		2699.6	0.0999354	1.06548e-06	93793.6		2699.6	0.0998572	8.11522e-07	123049
2704.59	0.104783	1.41341e-06	74134.9		2704.59	0.10494	1.11573e-06	94055.1		2704.59	0.104861	8.5017e-07	123342
2709.58	0.109866	1.47402e-06	74534.8		2709.58	0.109866	1.17193e-06	93747.3		2709.58	0.109866	8.99115e-07	122193
2714.57	0.114792	1.53933e-06	74572.3		2714.57	0.114948	1.22689e-06	93690.8		2714.57	0.11487	9.34969e-07	122859
2719.56	0.119874	1.61595e-06	74181.6		2719.56	0.119874	1.28247e-06	93471.3		2719.56	0.119874	9.71293e-07	123417
2724.56	0.124878	1.68535e-06	74096.3		2724.56	0.124878	1.33177e-06	93768.7		2724.56	0.1248	1.01694e-06	122721
2729.55	0.129882	1.75695e-06	73925.1		2729.55	0.129882	1.38232e-06	93959.4		2729.55	0.129804	1.05889e-06	122585
2734.54	0.134808	1.8119e-06	74401.7		2734.54	0.134887	1.43006e-06	94322.6		2734.54	0.134808	1.09783e-06	122796
2739.53	0.139813	1.87659e-06	74503.7		2739.53	0.139969	1.49568e-06	93581.9		2739.53	0.139813	1.14304e-06	122316
2744.52	0.144895	1.9485e-06	74362.5		2744.52	0.144895	1.55723e-06	93046.5		2744.52	0.144895	1.17978e-06	122815
2749.52	0.149821	2.00879e-06	74582.8		2749.52	0.149977	1.60936e-06	93190.8		2749.52	0.149821	1.21998e-06	122806
2754.51	0.154825	2.08635e-06	74208.7		2754.51	0.154903	1.65991e-06	93320		2754.51	0.154825	1.26363e-06	122524
2759.5	0.159829	2.15072e-06	74314.3		2759.5	0.159907	1.71707e-06	93128.4		2759.5	0.159829	1.31136e-06	121881
2764.49	0.164834	2.22766e-06	73994.2		2764.49	0.164912	1.76699e-06	93328.9		2764.49	0.164912	1.34872e-06	122272
2769.48	0.169916	2.29737e-06	73961.1		2769.48	0.169916	1.82854e-06	92924.3		2769.48	0.169916	1.3886e-06	122364
2774.48	0.174764	2.36111e-06	74017.5		2774.48	0.17492	1.87062e-06	93509.2		2774.48	0.174842	1.43759e-06	121621
2779.47	0.179768	2.42454e-06	74145		2779.47	0.179924	1.9262e-06	93408.9		2779.47	0.179924	1.47308e-06	122142
2784.46	0.18485	2.49834e-06	73989.3		2784.46	0.184928	1.98304e-06	93255.2		2784.46	0.18485	1.51484e-06	122026
2789.45	0.189854	2.55266e-06	74375.1		2789.45	0.189854	2.0449e-06	92843		2789.45	0.189854	1.54938e-06	122536
2794.44	0.194859	2.6139e-06	74547.2		2794.44	0.194859	2.0964e-06	92949.3		2794.44	0.194859	1.58895e-06	122634
2799.44	0.199863	2.70025e-06	74016.4		2799.44	0.199941	2.15606e-06	92734.5		2799.44	0.199863	1.62977e-06	122633
2800.08	0.200176	2.69931e-06	74158.1		2800.08	0.200254	2.15135e-06	93082.9		2800.08	0.200176	1.6304e-06	122777
2805.07	0.194937	2.64435e-06	73718.1		2805.07	0.194937	2.09012e-06	93266		2805.07	0.194859	1.58298e-06	123096
2810.06	0.190011	2.56271e-06	74144.5		2810.06	0.189933	2.02731e-06	93686.9		2810.06	0.189933	1.54027e-06	123311
2815.05	0.184928	2.48954e-06	74282		2815.05	0.185007	1.98429e-06	93235.5		2815.05	0.184928	1.50228e-06	123099
2820.05	0.180002	2.40978e-06	74696.5		2820.05	0.180002	1.9284e-06	93343		2820.05	0.180002	1.45612e-06	123618
2825.04	0.17492	2.35389e-06	74311.1		2825.04	0.17492	1.86968e-06	93556.3		2825.04	0.17492	1.42943e-06	122371
2830.03	0.169916	2.29014e-06	74194.4		2830.03	0.169994	1.82289e-06	93255.3		2830.03	0.169994	1.38232e-06	122977
2835.02	0.164912	2.20693e-06	74724.5		2835.02	0.16499	1.76637e-06	93406.4		2835.02	0.16499	1.33711e-06	123393
2840.01	0.159986	2.14319e-06	74648.6		2840.01	0.159986	1.71173e-06	93464.5		2840.01	0.159907	1.29785e-06	123209
2845.01	0.154903	2.08227e-06	74391.7		2845.01	0.154981	1.65866e-06	93437.8		2845.01	0.154903	1.2564e-06	123291
2850	0.150055	2.00722e-06	74758		2850	0.150055	1.59052e-06	94343.8		2850	0.149977	1.21307e-06	123635
2854.99	0.144895	1.94002e-06	74687.5		2854.99	0.144973	1.54498e-06	93834.6		2854.99	0.144973	1.17539e-06	123341
2859.98	0.139891	1.88852e-06	74074.3		2859.98	0.139969	1.48218e-06	94434.4		2859.98	0.139969	1.13614e-06	123197
2864.97	0.134965	1.82446e-06	73975.2		2864.97	0.134965	1.42817e-06	94501.8		2864.97	0.134965	1.09469e-06	123291
2869.97	0.130039	1.73685e-06	74870.5		2869.97	0.129961	1.37228e-06	94704.4		2869.97	0.129882	1.06203e-06	122296
2874.96	0.124956	1.6731e-06	74685.4		2874.96	0.125035	1.32046e-06	94689.9		2874.96	0.124956	1.02026e-06	122474
2879.95	0.12003	1.60433e-06	74816.3		2879.95	0.119952	1.26896e-06	94527.6		2879.95	0.119952	9.7222e-07	123380
2884.94	0.114948	1.55221e-06	74054.5		2884.94	0.114948	1.21056e-06	94954.5		2884.94	0.11487	9.3077e-07	123414
2889.93	0.1101	1.49035e-06	73875.6		2889.93	0.110022	1.16157e-06	94718.2		2889.93	0.109866	9.0031e-07	122031
2894.93	0.105018	1.42409e-06	73743.8		2894.93	0.105096	1.10819e-06	94835.8		2894.93	0.10494	8.51324e-07	123266
2899.92	0.100014	1.3572e-06	73690.9		2899.92	0.100014	1.05512e-06	94788.8		2899.92	0.0999354	8.08304e-07	123636
2904.91	0.0950094	1.28058e-06	74192.3		2904.91	0.0950094	9.97969e-07	95202.7		2904.91	0.0949312	7.7282e-07	122837
2909.9	0.0900052	1.2294e-06	73210.7		2909.9	0.0900052	9.42074e-07	95539.4		2909.9	0.089927	7.32626e-07	122746
2914.89	0.085001	1.15655e-06	73495.5		2914.89	0.085001	8.92774e-07	95210		2914.89	0.085001	6.88664e-07	123429
2919.89	0.0799968	1.08589e-06	73669.1		2919.89	0.0799186	8.42531e-07	94855.4		2919.89	0.0799968	6.48783e-07	123303
2924.88	0.0749926	1.02026e-06	73503.1		2924.88	0.0749926	7.90405e-07	94878.8		2924.88	0.0748363	6.09532e-07	122777
2929.87	0.0700666	9.51809e-07	73614.2		2929.87	0.0699103	7.35766e-07	95017		2929.87	0.0699103	5.68709e-07	122928
2934.86	0.0650624	8.78957e-07	74022.3		2934.86	0.0650624	6.83011e-07	95258.2		2934.86	0.0649843	5.29143e-07	122810
2939.85	0.0599801	8.19294e-07	73209.4		2939.85	0.0599801	6.32141e-07	94884.1		2939.85	0.0599019	4.85495e-07	123383
2944.85	0.0549759	7.49897e-07	73311.3		2944.85	0.0549759	5.77816e-07	95144.3		2944.85	0.0548977	4.50325e-07	121907
2949.84	0.0500499	6.80499e-07	73548.8		2949.84	0.0499717	5.26317e-07	94945.9		2949.84	0.0499717	4.08875e-07	122217
2954.83	0.0449675	6.14556e-07	73170.7		2954.83	0.0449675	4.71993e-07	95271.6		2954.83	0.0448893	3.67111e-07	122277
2959.82	0.0400415	5.44216e-07	73576.5		2959.82	0.0399633	4.2018e-07	95110		2959.82	0.0399633	3.25347e-07	122833
2964.81	0.0350373	4.73563e-07	73986.6		2964.81	0.0349591	3.65227e-07	95718.8		2964.81	0.0349591	2.84525e-07	122868
2969.81	0.0299549	4.06677e-07	73657.7		2969.81	0.0300331	3.15927e-07	95063.6		2969.81	0.0298767	2.47157e-07	120882
2974.8	0.0250289	3.4042e-07	73523.7		2974.8	0.0249507	2.6223e-07	95148.3		2974.8	0.0248725	2.05707e-07	120912
2979.79	0.0199465	2.73849e-07	72837.9		2979.79	0.0199465	2.11987e-07	94093.1		2979.79	0.0198684	1.64885e-07	120498
2984.78	0.0149424	2.06963e-07	72198.1		2984.78	0.0149424	1.59233e-07	93839.7		2984.78	0.0149424	1.24377e-07	120138
2989.77	0.0100164	1.39136e-07	71989.8		2989.77	0.00993817	1.07734e-07	92247.2		2989.77	0.00993817	8.35549e-08	118942
2994.77	0.00501217	7.22503e-08	69372.2		2994.77	0.00501217	5.53334e-08	90581.2		2994.77	0.00493397	4.31834e-08	114256
2999.76	8.61654e-05	4.79938e-09	17953.4		2999.76	-7.02155e-05	3.31521e-09	-21179.8		2999.76	-7.02155e-05	2.43155e-09	-28876.9
3004.75	-0.00507441	-6.26511e-08	80994.6		3004.75	-0.00499622	-4.85188e-08	102975		3004.75	-0.00507441	-3.78278e-08	134145
3009.74	-0.0100004	-1.30088e-07	76874.4		3009.74	-0.0100786	-1.00882e-07	99905		3009.74	-0.0100786	-7.83516e-08	128633
3014.73	-0.0150046	-1.96457e-07	76375.8		3014.73	-0.0150046	-1.51656e-07	98938.2		3014.73	-0.0150828	-1.18346e-07	127447
3019.73	-0.0200088	-2.63392e-07	75965.7		3019.73	-0.020087	-2.03584e-07	98666.7		3019.73	-0.020087	-1.59097e-07	126256
3024.72	-0.025013	-3.31803e-07	75385.1		3024.72	-0.0249348	-2.55481e-07	97599.5		3024.72	-0.0250912	-1.99691e-07	125650
3029.71	-0.0300172	-4.00527e-07	74944.1		3029.71	-0.029939	-3.06341e-07	97730.8		3029.71	-0.0300954	-2.40505e-07	125134
3034.7	-0.0349432	-4.6809e-07	74650.5		3034.7	-0.0350214	-3.59745e-07	97350.6		3034.7	-0.0350214	-2.83328e-07	123607
3039.69	-0.0400255	-5.35151e-07	74793.1		3039.69	-0.0400255	-4.12928e-07	96930.9		3039.69	-0.0401037	-3.22667e-07	124288
3044.69	-0.0450297	-6.01929e-07	74809.1		3044.69	-0.0451079	-4.63852e-07	97246.4		3044.69	-0.0451079	-3.61848e-07	124660
3049.68	-0.0500339	-6.71783e-07	74479.3		3049.68	-0.0499557	-5.16062e-07	96801.8		3049.68	-0.0501121	-4.00873e-07	125008
3054.67	-0.0550381	-7.37902e-07	74587.3		3054.67	-0.0550381	-5.68806e-07	96760.7		3054.67	-0.0551163	-4.42942e-07	124432
3059.66	-0.0600423	-8.04931e-07	74593.1		3059.66	-0.0599641	-6.20483e-07	96641		3059.66	-0.0601205	-4.84259e-07	124150
3064.65	-0.0650465	-8.81096e-07	73824.5		3064.65	-0.0650465	-6.70182e-07	97057.9		3064.65	-0.0650465	-5.25669e-07	123740
3069.65	-0.0700507	-9.46901e-07	73978.9		3069.65	-0.0700507	-7.23491e-07	96823.1		3069.65	-0.0700507	-5.65039e-07	123975
3074.64	-0.0749767	-1.01519e-06	73855.1		3074.64	-0.0749767	-7.78371e-07	96325.2		3074.64	-0.0750549	-6.03247e-07	124418
3079.63	-0.0799809	-1.08929e-06	73424.5		3079.63	-0.0799809	-8.31617e-07	96175.1		3079.63	-0.0800591	-6.43527e-07	124407
3084.62	-0.0850633	-1.15367e-06	73732.9		3084.62	-0.0851415	-8.81661e-07	96569.3		3084.62	-0.0850633	-6.88548e-07	123540
3089.61	-0.0900675	-1.22055e-06	73792.3		3089.61	-0.0899893	-9.34939e-07	96251.5		3089.61	-0.0900675	-7.2729e-07	123840
3094.61	-0.0950716	-1.29026e-06	73683.8		3094.61	-0.0950716	-9.92644e-07	95776.2		3094.61	-0.0950716	-7.69611e-07	123532
3099.6	-0.0999976	-1.36594e-06	73207.8		3099.6	-0.0999976	-1.05475e-06	94806.7		3099.6	-0.100076	-8.03864e-07	124494
3104.59	-0.10508	-1.43597e-06	73177.1		3104.59	-0.105002	-1.10971e-06	94621.3		3104.59	-0.105158	-8.49701e-07	123759
3109.58	-0.110084	-1.48998e-06	73883.1		3109.58	-0.110006	-1.16058e-06	94785.7		3109.58	-0.110006	-8.94847e-07	122933
3114.57	-0.11501	-1.56785e-06	73355.1		3114.57	-0.11501	-1.21364e-06	94764.3		3114.57	-0.115088	-9.36823e-07	122850
3119.57	-0.120093	-1.64071e-06	73195.7		3119.57	-0.120014	-1.26671e-06	94744.7		3119.57	-0.120093	-9.7726e-07	122887
3124.56	-0.125097	-1.71073e-06	73124.7		3124.56	-0.125019	-1.31821e-06	94839.5		3124.56	-0.125019	-1.02175e-06	122358
3129.55	-0.130023	-1.78139e-06	72989.7		3129.55	-0.130023	-1.37316e-06	94688.4		3129.55	-0.130179	-1.07297e-06	121326
3134.54	-0.135105	-1.84293e-06	73309.9		3134.54	-0.135027	-1.4278e-06	94569.7		3134.54	-0.135183	-1.11128e-06	121647
3139.53	-0.140031	-1.92332e-06	72807		3139.53	-0.140031	-1.48213e-06	94479.8		3139.53	-0.140031	-1.1543e-06	121313
3144.53	-0.145114	-1.99994e-06	72558.9		3144.53	-0.145035	-1.53991e-06	94184.5		3144.53	-0.145035	-1.20579e-06	120282
3149.52	-0.150118	-2.05866e-06	72920.1		3149.52	-0.15004	-1.59141e-06	94281.1		3149.52	-0.150118	-1.2441e-06	120663
3154.51	-0.155044	-2.13685e-06	72557.1		3154.51	-0.155044	-1.64385e-06	94317.6		3154.51	-0.155122	-1.27645e-06	121526
3159.5	-0.15997	-2.20468e-06	72559.2		3159.5	-0.160048	-1.70571e-06	93830.8		3159.5	-0.160048	-1.3179e-06	121442
3164.49	-0.165052	-2.28444e-06	72250.6		3164.49	-0.165052	-1.75595e-06	93995.9		3164.49	-0.165052	-1.35903e-06	121448
3169.49	-0.170056	-2.35792e-06	72121.4		3169.49	-0.170056	-1.8197e-06	93453.2		3169.49	-0.170134	-1.39672e-06	121810
3174.48	-0.17506	-2.41695e-06	72430.2		3174.48	-0.174982	-1.87433e-06	93357		3174.48	-0.175139	-1.44853e-06	120908
3179.47	-0.179986	-2.49766e-06	72062.2		3179.47	-0.179986	-1.92992e-06	93261.4		3179.47	-0.180065	-1.48966e-06	120876
3184.46	-0.185069	-2.56862e-06	72049.8		3184.46	-0.184991	-1.98581e-06	93156.3		3184.46	-0.185069	-1.533e-06	120723
3189.45	-0.190073	-2.64305e-06	71914.4		3189.45	-0.190073	-2.03856e-06	93238.7		3189.45	-0.190073	-1.57099e-06	120989
3194.45	-0.195077	-2.7115e-06	71944.4		3194.45	-0.194999	-2.10357e-06	92699.3		3194.45	-0.195077	-1.6137e-06	120888
3199.44	-0.200003	-2.76488e-06	72337		3199.44	-0.200003	-2.15946e-06	92617.2		3199.44	-0.200081	-1.66018e-06	120518
3200.08	-0.200316	-2.77525e-06	72179.6		3200.08	-0.200316	-2.17108e-06	92265.6		3200.08	-0.200394	-1.65829e-06	120844
3205.07	-0.195155	-2.71213e-06	71956.6		3205.07	-0.195077	-2.10262e-06	92778		3205.07	-0.195155	-1.61464e-06	120866
3210.06	-0.190073	-2.62295e-06	72465.4		3210.06	-0.190073	-2.05113e-06	92667.7		3210.06	-0.190151	-1.5823e-06	120174
3215.05	-0.185147	-2.56234e-06	72256.9		3215.05	-0.185147	-1.99052e-06	93014.4		3215.05	-0.185225	-1.54242e-06	120087
3220.04	-0.180065	-2.50833e-06	71786.6		3220.04	-0.180143	-1.93023e-06	93327.2		3220.04	-0.180221	-1.50223e-06	119969
3225.04	-0.17506	-2.41067e-06	72618.9		3225.04	-0.175139	-1.87967e-06	93175.1		3225.04	-0.175139	-1.46266e-06	119740
3230.03	-0.170056	-2.3419e-06	72614.6		3230.03	-0.170056	-1.82974e-06	92940		3230.03	-0.170134	-1.41807e-06	119976
3235.02	-0.16513	-2.26999e-06	72744.8		3235.02	-0.16513	-1.766e-06	93505.3		3235.02	-0.165209	-1.37411e-06	120230
3240.01	-0.160126	-2.20405e-06	72650.8		3240.01	-0.160048	-1.71073e-06	93555.2		3240.01	-0.160204	-1.32889e-06	120555
3245	-0.155122	-2.13622e-06	72615		3245	-0.155122	-1.65766e-06	93578.7		3245	-0.1552	-1.28461e-06	120815
3250	-0.150118	-2.06055e-06	72853.4		3250	-0.15004	-1.60177e-06	93671.2		3250	-0.150118	-1.24819e-06	120269
3254.99	-0.145114	-1.98895e-06	72959.9		3254.99	-0.145114	-1.54525e-06	93909.7		3254.99	-0.145114	-1.20422e-06	120504
3259.98	-0.140109	-1.91987e-06	72978.7		3259.98	-0.140031	-1.49532e-06	93646.5		3259.98	-0.140109	-1.16372e-06	120398
3264.97	-0.135105	-1.85518e-06	72825.9		3264.97	-0.135105	-1.43754e-06	93983.7		3264.97	-0.135183	-1.12101e-06	120591
3269.96	-0.130101	-1.78484e-06	72892.2		3269.96	-0.130023	-1.38353e-06	93979.2		3269.96	-0.130179	-1.07297e-06	121326
3274.96	-0.125175	-1.72329e-06	72637.1		3274.96	-0.125097	-1.33077e-06	94003.1		3274.96	-0.125175	-1.03371e-06	121092
3279.95	-0.120093	-1.65295e-06	72653.4		3279.95	-0.120014	-1.27488e-06	94138		3279.95	-0.120171	-9.94776e-07	120802
3284.94	-0.115088	-1.58418e-06	72648.4		3284.94	-0.115167	-1.21647e-06	94672.7		3284.94	-0.115167	-9.54268e-07	120686
3289.93	-0.110162	-1.52075e-06	72439.4		3289.93	-0.110084	-1.16968e-06	94114.6		3289.93	-0.110162	-9.16272e-07	120229
3294.92	-0.10508	-1.44288e-06	72826.8		3294.92	-0.105158	-1.11033e-06	94708.7		3294.92	-0.10508	-8.7388e-07	120245
3299.92	-0.100154	-1.37693e-06	72737		3299.92	-0.100076	-1.05852e-06	94543.1		3299.92	-0.100154	-8.30231e-07	120634
3304.91	-0.0951498	-1.31036e-06	72613.4		3304.91	-0.0951498	-1.00168e-06	94989.9		3304.91	-0.0951498	-7.89409e-07	120533
3309.9	-0.0900675	-1.23877e-06	72707.4		3309.9	-0.0901456	-9.51756e-07	94715.1		3309.9	-0.0901456	-7.43877e-07	121184
3314.89	-0.0851415	-1.16654e-06	72986.2		3314.89	-0.0851415	-8.95861e-07	95038.7		3314.89	-0.0851415	-7.00543e-07	121536
3319.88	-0.0801373	-1.10311e-06	72646.6		3319.88	-0.0801373	-8.47816e-07	94522		3319.88	-0.0801373	-6.59093e-07	121587
3324.88	-0.0751331	-1.02335e-06	73418.7		3324.88	-0.0750549	-7.89409e-07	95077.3		3324.88	-0.0751331	-6.20155e-07	121152
3329.87	-0.0701289	-9.64002e-07	72747.6		3329.87	-0.0700507	-7.34142e-07	95418.4		3329.87	-0.0701289	-5.79647e-07	120986
3334.86	-0.0651247	-8.83614e-07	73702.6		3334.86	-0.0650465	-6.81388e-07	95461.8		3334.86	-0.0651247	-5.3537e-07	121644
3339.85	-0.0601205	-8.23009e-07	73049.6		3339.85	-0.0600423	-6.28947e-07	95464.8		3339.85	-0.0601205	-4.92978e-07	121954
3344.84	-0.0551163	-7.53297e-07	73166.7		3344.84	-0.0551945	-5.74936e-07	96001		3344.84	-0.0551163	-4.52784e-07	121728
3349.84	-0.0501903	-6.82958e-07	73489.6		3349.84	-0.0501903	-5.19042e-07	96698		3349.84	-0.0501903	-4.10392e-07	122298
3354.83	-0.0451079	-6.15444e-07	73293.3		3354.83	-0.0451079	-4.68485e-07	96284.7		3354.83	-0.0451079	-3.70826e-07	121642
3359.82	-0.0401037	-5.45733e-07	73486		3359.82	-0.0400255	-4.173e-07	95915.4		3359.82	-0.0401819	-3.32202e-07	120956
3364.81	-0.0350995	-4.74451e-07	73979.2		3364.81	-0.0350995	-3.6486e-07	96200.1		3364.81	-0.0351777	-2.91066e-07	120858
3369.8	-0.0301735	-4.05682e-07	74377.4		3369.8	-0.0300954	-3.11791e-07	96524.1		3369.8	-0.0301735	-2.49616e-07	120880
3374.8	-0.0251694	-3.40681e-07	73879.6		3374.8	-0.0250912	-2.59664e-07	96629.2		3374.8	-0.0251694	-2.05968e-07	122200
3379.79	-0.0201652	-2.72225e-07	74075.3		3379.79	-0.020087	-2.0691e-07	97080.8		3379.79	-0.0201652	-1.66402e-07	121184
3384.78	-0.015161	-2.0377e-07	74402.5		3384.78	-0.015161	-1.53841e-07	98549.6		3384.78	-0.0152392	-1.2401e-07	122887
3389.77	-0.0101568	-1.3343e-07	76120.7		3389.77	-0.0100004	-1.02657e-07	97416.2		3389.77	-0.0101568	-8.06085e-08	126001
3394.76	-0.0051526	-6.44713e-08	79920.8		3394.76	-0.0051526	-4.8805e-08	105575		3394.76	-0.00523079	-3.92294e-08	133338
3399.76	-0.000148406	3.01028e-09	-49299.7		3399.76	7.97493e-06	2.2013e-09	3622.83		3399.76	-0.000148406	1.8217e-09	-81465.7
3404.75	0.00485578	7.11516e-08	68245.7		3404.75	0.00493397	5.46701e-08	90250		3404.75	0.00485578	4.32603e-08	112246
3409.74	0.00985997	1.39128e-07	70870		3409.74	0.00985997	1.05943e-07	93068.9		3409.74	0.00985997	8.445e-08	116755
3414.73	0.014786	2.06942e-07	71450		3414.73	0.0149424	1.57274e-07	95008.3		3414.73	0.014786	1.25816e-07	117521
3419.72	0.0198684	2.74818e-07	72296.3		3419.72	0.0198684	2.08888e-07	95114.8		3419.72	0.0198684	1.67383e-07	118700
3424.72	0.0248725	3.42789e-07	72559.3		3424.72	0.0248725	2.61287e-07	95192.4		3424.72	0.0247944	2.07067e-07	119741
3429.71	0.0298767	4.07841e-07	73255.9		3429.71	0.0298767	3.13278e-07	95368.2		3429.71	0.0297985	2.49796e-07	119291
3434.7	0.0348809	4.74242e-07	73550.9		3434.7	0.0348809	3.64138e-07	95790.3		3434.7	0.0348027	2.90234e-07	119913
3439.69	0.0398851	5.46796e-07	72943.3		3439.69	0.0399633	4.1616e-07	96028.6		3439.69	0.0398851	3.31707e-07	120242
3444.68	0.0448893	6.10372e-07	73544.2		3444.68	0.0448893	4.70349e-07	95438.4		3444.68	0.0448893	3.74059e-07	120006
3449.68	0.0498935	6.81891e-07	73169.3		3449.68	0.0499717	5.19796e-07	96137		3449.68	0.0498153	4.15313e-07	119947
3454.67	0.0547413	7.49422e-07	73044.7		3454.67	0.0548977	5.73231e-07	95768.8		3454.67	0.0548195	4.55938e-07	120234
3459.66	0.0598237	8.22511e-07	72733		3459.66	0.0599019	6.23056e-07	96142.1		3459.66	0.0599801	4.95873e-07	120958
3464.65	0.0649061	8.88315e-07	73066.5		3464.65	0.0649061	6.76899e-07	95887.4		3464.65	0.0648279	5.41334e-07	119756
3469.64	0.0698321	9.50855e-07	73441.4		3469.64	0.0698321	7.27194e-07	96029.5		3469.64	0.0698321	5.77909e-07	120836
3474.64	0.0749144	1.02529e-06	73066.7		3474.64	0.0749144	7.73722e-07	96823.5		3474.64	0.0748363	6.24783e-07	119780
3479.63	0.0799186	1.10002e-06	72651.7		3479.63	0.0798405	8.28507e-07	96366.6		3479.63	0.0798405	6.64623e-07	120129
3484.62	0.0848446	1.16251e-06	72983.8		3484.62	0.0848446	8.81785e-07	96219.2		3484.62	0.0849228	7.07792e-07	119983
3489.61	0.0898488	1.23348e-06	72841.7		3489.61	0.089927	9.32457e-07	96440.9		3489.61	0.089927	7.53504e-07	119345
3494.6	0.0949312	1.30225e-06	72897.8		3494.6	0.0949312	9.79142e-07	96953.5		3494.6	0.094853	7.91586e-07	119827
3499.6	0.0998572	1.36757e-06	73018.2		3499.6	0.0999354	1.03722e-06	96349.2		3499.6	0.0998572	8.33279e-07	119836
3504.59	0.104861	1.43948e-06	72846.9		3504.59	0.104861	1.09029e-06	96177.5		3504.59	0.104783	8.71801e-07	120192
3509.58	0.109866	1.49694e-06	73393.4		3509.58	0.109866	1.14147e-06	96248.8		3509.58	0.109866	9.17701e-07	119718
3514.57	0.114948	1.5767e-06	72904.1		3514.57	0.11487	1.19454e-06	96162.1		3514.57	0.114792	9.62534e-07	119260
3519.56	0.119874	1.6461e-06	72823.1		3519.56	0.119952	1.25264e-06	95759.8		3519.56	0.119796	9.91323e-07	120844
3524.56	0.124878	1.69571e-06	73643.5		3524.56	0.124878	1.2988e-06	96149.1		3524.56	0.124878	1.04193e-06	119853
3529.55	0.129882	1.77453e-06	73192.5		3529.55	0.129961	1.35281e-06	96067.3		3529.55	0.129804	1.08935e-06	119158
3534.54	0.134887	1.84204e-06	73226.6		3534.54	0.134965	1.40179e-06	96280		3534.54	0.134808	1.13331e-06	118951
3539.53	0.139891	1.91898e-06	72898.6		3539.53	0.139969	1.45455e-06	96228.5		3539.53	0.139891	1.17319e-06	119240
3544.52	0.144895	1.98869e-06	72859.5		3544.52	0.144895	1.51547e-06	95610.7		3544.52	0.144817	1.21966e-06	118735
3549.52	0.149821	2.05934e-06	72751.8		3549.52	0.149899	1.56665e-06	95681.2		3549.52	0.149977	1.25797e-06	119221
3554.51	0.154903	2.12529e-06	72885.9		3554.51	0.154903	1.62098e-06	95561.7		3554.51	0.154825	1.30099e-06	119005
3559.5	0.159907	2.19845e-06	72736.4		3559.5	0.159986	1.67499e-06	95514.6		3559.5	0.159907	1.33271e-06	119987
3564.49	0.164912	2.26816e-06	72707.1		3564.49	0.164912	1.72052e-06	95849.9		3564.49	0.164834	1.38452e-06	119054
3569.48	0.169916	2.33254e-06	72846		3569.48	0.169838	1.76071e-06	96459.6		3569.48	0.169838	1.43477e-06	118373
3574.48	0.174842	2.41135e-06	72507.7		3574.48	0.174842	1.82697e-06	95700.4		3574.48	0.17492	1.47841e-06	118316
3579.47	0.179846	2.4864e-06	72331.8		3579.47	0.179924	1.8813e-06	95638.5		3579.47	0.179846	1.52112e-06	118233
3584.46	0.18485	2.55455e-06	72361.3		3584.46	0.18485	1.92777e-06	95888.1		3584.46	0.18485	1.5588e-06	118585
3589.45	0.189933	2.61766e-06	72558.1		3589.45	0.189854	1.97016e-06	96364.9		3589.45	0.189854	1.60214e-06	118501
3594.44	0.194859	2.69208e-06	72382.1		3594.44	0.194859	2.02354e-06	96295.7		3594.44	0.19478	1.64013e-06	118759
3599.44	0.199863	2.73542e-06	73064.8		3599.44	0.199941	2.08509e-06	95890.7		3599.44	0.199941	1.67844e-06	119123
3600.08	0.200176	2.73196e-06	73271.7		3600.08	0.200254	2.08886e-06	95867.5		3600.08	0.200254	1.68315e-06	118975
3605.07	0.194937	2.66759e-06	73076		3605.07	0.195015	2.01412e-06	96823.7		3605.07	0.194937	1.63668e-06	119105
3610.06	0.190011	2.62049e-06	72509.7		3610.06	0.190011	1.9598e-06	96954.2		3610.06	0.189933	1.59209e-06	119298
3615.05	0.184928	2.54607e-06	72633		3615.05	0.184928	1.90736e-06	96955.2		3615.05	0.185007	1.55001e-06	119358
3620.04	0.179924	2.47384e-06	72730.6		3620.04	0.179924	1.8656e-06	96443.4		3620.04	0.179924	1.50793e-06	119319
3625.04	0.174998	2.39942e-06	72933.5		3625.04	0.17492	1.81692e-06	96272.7		3625.04	0.174998	1.46554e-06	119409
3630.03	0.169916	2.31558e-06	73379.4		3630.03	0.169916	1.75569e-06	96780.1		3630.03	0.169994	1.42158e-06	119581
3635.02	0.164912	2.2534e-06	73183.3		3635.02	0.164912	1.6954e-06	97270.2		3635.02	0.164912	1.38107e-06	119409
3640.01	0.159986	2.1884e-06	73106.1		3640.01	0.159986	1.64578e-06	97209.4		3640.01	0.159907	1.33334e-06	119930
3645	0.154981	2.11367e-06	73323.5		3645	0.154981	1.58863e-06	97556.5		3645	0.154981	1.29377e-06	119790
3650	0.149977	2.04678e-06	73274.7		3650	0.149977	1.54404e-06	97132.9		3650	0.149977	1.25138e-06	119850
3654.99	0.144895	1.98304e-06	73067.2		3654.99	0.144973	1.48155e-06	97852.1		3654.99	0.144895	1.21495e-06	119260
3659.98	0.139969	1.90705e-06	73395.7		3659.98	0.139969	1.4288e-06	97962.6		3659.98	0.139969	1.16817e-06	119819
3664.97	0.134965	1.83576e-06	73519.7		3664.97	0.134965	1.38389e-06	97525.3		3664.97	0.134965	1.12954e-06	119486
3669.96	0.129882	1.78144e-06	72908.7		3669.96	0.129961	1.3258e-06	98024.1		3669.96	0.129961	1.08872e-06	119370
3674.96	0.124956	1.70513e-06	73282.5		3674.96	0.124956	1.28058e-06	97577.7		3674.96	0.124956	1.04319e-06	119783
3679.95	0.119952	1.64735e-06	72815		3679.95	0.12003	1.22971e-06	97608.4		3679.95	0.119952	9.96399e-07	120386
3684.94	0.114948	1.57827e-06	72831.6		3684.94	0.114948	1.17005e-06	98241.9		3684.94	0.114948	9.57461e-07	120055
3689.93	0.110022	1.49506e-06	73590.5		3689.93	0.109944	1.12201e-06	97988.6		3689.93	0.110022	9.12557e-07	120565
3694.92	0.10494	1.42754e-06	73510.6		3694.92	0.10494	1.07961e-06	97201.1		3694.92	0.104861	8.68595e-07	120725
3699.92	0.0999354	1.36223e-06	73361.8		3699.92	0.100014	1.01587e-06	98451.4		3699.92	0.100014	8.30913e-07	120366
3704.91	0.0949312	1.30194e-06	72915.4		3704.91	0.0950094	9.63113e-07	98648.2		3704.91	0.094853	7.88521e-07	120292
3709.9	0.089927	1.24165e-06	72425.7		3709.9	0.0900052	9.12557e-07	98629.7		3709.9	0.0898488	7.46756e-07	120319
3714.89	0.0849228	1.17193e-06	72463.8		3714.89	0.0849228	8.63884e-07	98303.5		3714.89	0.0849228	7.0405e-07	120620
3719.88	0.0799968	1.09814e-06	72847.6		3719.88	0.0799968	8.2055e-07	97491.7		3719.88	0.0799968	6.626e-07	120732
3724.88	0.0749926	1.02372e-06	73255.1		3724.88	0.0749926	7.61829e-07	98437.6		3724.88	0.0749926	6.21778e-07	120610
3729.87	0.0699103	9.54635e-07	73232.5		3729.87	0.0699885	7.14099e-07	98009.5		3729.87	0.0699885	5.75618e-07	121588
3734.86	0.0649843	8.9246e-07	72814.8		3734.86	0.0649061	6.63542e-07	97817.5		3734.86	0.0649061	5.36052e-07	121082
3739.85	0.0599801	8.20864e-07	73069.4		3739.85	0.0599801	6.07333e-07	98759.7		3739.85	0.0599801	4.94602e-07	121269
3744.84	0.0549759	7.53037e-07	73005.6		3744.84	0.0549759	5.60545e-07	98075.8		3744.84	0.0548977	4.5378e-07	120979
3749.84	0.0499717	6.86151e-07	72829		3749.84	0.0498935	5.05278e-07	98744.6		3749.84	0.0499717	4.13586e-07	120826
3754.83	0.0449675	6.19894e-07	72540.6		3754.83	0.0449675	4.5692e-07	98414.4		3754.83	0.0449675	3.7402e-07	120228
3759.82	0.0400415	5.50183e-07	72778.6		3759.82	0.0399633	4.04793e-07	98725.3		3759.82	0.0399633	3.32255e-07	120279
3764.81	0.0349591	4.85495e-07	72007.1		3764.81	0.0348809	3.56435e-07	97860.6		3764.81	0.0349591	2.90805e-07	120215
3769.8	0.0299549	4.14528e-07	72262.8		3769.8	0.0299549	3.04936e-07	98233.5		3769.8	0.0298767	2.47785e-07	120575
3774.8	0.0249507	3.47642e-07	71771.3		3774.8	0.0248725	2.55636e-07	97296.9		3774.8	0.0249507	2.07277e-07	120374
3779.79	0.0199465	2.77931e-07	71768		3779.79	0.0200247	2.03509e-07	98397.3		3779.79	0.0199465	1.66455e-07	119831
3784.78	0.0149424	2.09789e-07	71225.5		3784.78	0.0149424	1.55151e-07	96308.8		3784.78	0.0149424	1.25633e-07	118937
3789.77	0.0100164	1.40392e-07	71345.7		3789.77	0.00993817	1.03024e-07	96464.7		3789.77	0.00985997	8.41829e-08	117126
3794.76	0.00485578	7.22503e-08	67207.8		3794.76	0.00509036	5.36695e-08	94846.4		3794.76	0.00485578	4.35601e-08	111473
3799.76	-7.02155e-05	4.13975e-09	-16961.3		3799.76	-7.02155e-05	3.01339e-09	-23301.2		3799.76	-7.02155e-05	2.38176e-09	-29480.5
3804.75	-0.0051526	-6.40886e-08	80398		3804.75	-0.00499622	-4.71809e-08	105895		3804.75	-0.0051526	-3.89542e-08	132273
3809.74	-0.0100004	-1.32034e-07	75741.1		3809.74	-0.0100004	-9.72476e-08	102834		3809.74	-0.0100786	-8.02559e-08	125581
3814.73	-0.0150046	-2.00162e-07	74962.2		3814.73	-0.0150828	-1.46633e-07	102861		3814.73	-0.0150828	-1.20669e-07	124993
3819.72	-0.020087	-2.68007e-07	74949.3		3819.72	-0.020087	-1.98686e-07	101099		3819.72	-0.020087	-1.62425e-07	123669
3824.72	-0.0250912	-3.3623e-07	74625.1		3824.72	-0.0250912	-2.46847e-07	101647		3824.72	-0.0250912	-2.02234e-07	124070
3829.71	-0.0300172	-4.04483e-07	74211.2		3829.71	-0.0300954	-2.96766e-07	101411		3829.71	-0.0300954	-2.44021e-07	123331
3834.7	-0.0350214	-4.71952e-07	74205.4		3834.7	-0.0350995	-3.48505e-07	100715		3834.7	-0.0350214	-2.84992e-07	122885
3839.69	-0.0401037	-5.43345e-07	73809		3839.69	-0.0400255	-3.96258e-07	101009		3839.69	-0.0401037	-3.26214e-07	122937
3844.68	-0.0451079	-6.12446e-07	73652.1		3844.68	-0.0451079	-4.47024e-07	100907		3844.68	-0.0450297	-3.67625e-07	122488
3849.68	-0.0500339	-6.78345e-07	73758.8		3849.68	-0.0499557	-4.9801e-07	100311		3849.68	-0.0501121	-4.09569e-07	122353
3854.67	-0.0550381	-7.47226e-07	73656.6		3854.67	-0.0551163	-5.51822e-07	99880.7		3854.67	-0.0551163	-4.52644e-07	121765
3859.66	-0.0600423	-8.13847e-07	73775.9		3859.66	-0.0600423	-5.9882e-07	100268		3859.66	-0.0600423	-4.93395e-07	121692
3864.65	-0.0651247	-8.79401e-07	74055.8		3864.65	-0.0649683	-6.51753e-07	99682.4		3864.65	-0.0650465	-5.34272e-07	121748
3869.64	-0.0700507	-9.47246e-07	73951.9		3869.64	-0.0699725	-7.03744e-07	99428.9		3869.64	-0.0699725	-5.75556e-07	121574
3874.64	-0.0751331	-1.01741e-06	73847		3874.64	-0.0750549	-7.58121e-07	99001.3		3874.64	-0.0751331	-6.17877e-07	121599
3879.63	-0.0800591	-1.09652e-06	73012.2		3879.63	-0.0800591	-8.06501e-07	99267.2		3879.63	-0.0801373	-6.58817e-07	121638
3884.62	-0.0850633	-1.16623e-06	72938.8		3884.62	-0.0850633	-8.52558e-07	99774.2		3884.62	-0.0850633	-7.00824e-07	121376
3889.61	-0.0899893	-1.23939e-06	72607.5		3889.61	-0.0900675	-9.11832e-07	98776.3		3889.61	-0.0900675	-7.42611e-07	121285
3894.6	-0.0950716	-1.31382e-06	72363		3894.6	-0.0949934	-9.65738e-07	98363.6		3894.6	-0.0950716	-7.86533e-07	120874
3899.6	-0.100076	-1.38604e-06	72202.7		3899.6	-0.0999976	-1.01208e-06	98804.3		3899.6	-0.100154	-8.25244e-07	121363
3904.59	-0.10508	-1.4523e-06	72354.4		3904.59	-0.105002	-1.07768e-06	97433.6		3904.59	-0.105158	-8.67659e-07	121198
3909.58	-0.110006	-1.52546e-06	72113.2		3909.58	-0.110084	-1.13545e-06	96951.6		3909.58	-0.110084	-9.05585e-07	121561
3914.57	-0.115167	-1.60365e-06	71815.2		3914.57	-0.115088	-1.17282e-06	98129.4		3914.57	-0.115088	-9.47435e-07	121474
3919.56	-0.120014	-1.67525e-06	71639.8		3919.56	-0.120014	-1.2306e-06	97525		3919.56	-0.120093	-9.90792e-07	121209
3924.56	-0.125175	-1.73742e-06	72046.3		3924.56	-0.125019	-1.28618e-06	97201.3		3924.56	-0.125175	-1.04219e-06	120107
3929.55	-0.130023	-1.8087e-06	71887.2		3929.55	-0.130023	-1.35118e-06	96228.8		3929.55	-0.130101	-1.08364e-06	120059
3934.54	-0.135027	-1.87308e-06	72088.3		3934.54	-0.135027	-1.40017e-06	96436.1		3934.54	-0.135105	-1.13043e-06	119517
3939.53	-0.140031	-1.93651e-06	72311.1		3939.53	-0.140031	-1.44476e-06	96923.4		3939.53	-0.140109	-1.17031e-06	119720
3944.52	-0.145035	-2.01062e-06	72134.7		3944.52	-0.145035	-1.50254e-06	96526.8		3944.52	-0.145114	-1.21239e-06	119692
3949.52	-0.15004	-2.07468e-06	72319.5		3949.52	-0.15004	-1.56252e-06	96024.3		3949.52	-0.150118	-1.25038e-06	120057
3954.51	-0.155044	-2.14627e-06	72238.6		3954.51	-0.155044	-1.60208e-06	96776.4		3954.51	-0.1552	-1.29121e-06	120198
3959.5	-0.15997	-2.20813e-06	72445.7		3959.5	-0.160048	-1.66112e-06	96349.6		3959.5	-0.160048	-1.34302e-06	119170
3964.49	-0.165052	-2.29323e-06	71973.6		3964.49	-0.165052	-1.71701e-06	96127.5		3964.49	-0.16513	-1.38196e-06	119490
3969.48	-0.170134	-2.37707e-06	71573.1		3969.48	-0.170134	-1.77102e-06	96065.7		3969.48	-0.170056	-1.43032e-06	118894
3974.48	-0.17506	-2.45055e-06	71437.1		3974.48	-0.174982	-1.81153e-06	96593.6		3974.48	-0.17506	-1.47114e-06	118997
3979.47	-0.180065	-2.51587e-06	71571.6		3979.47	-0.179986	-1.87433e-06	96026.9		3979.47	-0.180065	-1.51541e-06	118822
3984.46	-0.185069	-2.5815e-06	71690.5		3984.46	-0.184991	-1.91798e-06	96450.7		3984.46	-0.185069	-1.55121e-06	119306
3989.45	-0.190073	-2.66094e-06	71430.7		3989.45	-0.190073	-1.98644e-06	95685.4		3989.45	-0.190073	-1.59737e-06	118991
3994.44	-0.195077	-2.74447e-06	71080.1		3994.44	-0.194999	-2.04453e-06	95375.9		3994.44	-0.195155	-1.63788e-06	119151
3999.44	-0.200003	-2.79283e-06	71613.1		3999.44	-0.200003	-2.0819e-06	96067.7		3999.44	-0.20016	-1.69158e-06	118327
4000.08	-0.200394	-2.80162e-06	71527.9		4000.08	-0.200316	-2.09446e-06	95640.9		4000.08	-0.200394	-1.69189e-06	118444
4005.07	-0.195077	-2.7272e-06	71530.2		4005.07	-0.195155	-2.03511e-06	95894.3		4005.07	-0.195155	-1.64353e-06	118741
4010.06	-0.190229	-2.64776e-06	71845.6		4010.06	-0.190073	-1.97513e-06	96233		4010.06	-0.190073	-1.59392e-06	119249
4015.05	-0.185147	-2.5793e-06	71781.9		4015.05	-0.185069	-1.93054e-06	95863.6		4015.05	-0.185225	-1.55655e-06	118997
4020.05	-0.180065	-2.52278e-06	71375.6		4020.05	-0.180065	-1.87967e-06	95795.8		4020.05	-0.180221	-1.51447e-06	118999
4025.04	-0.175139	-2.45432e-06	71359.3		4025.04	-0.17506	-1.83069e-06	95625.6		4025.04	-0.175139	-1.46643e-06	119432
4030.03	-0.170134	-2.37205e-06	71724.7		4030.03	-0.170134	-1.77228e-06	95997.6		4030.03	-0.170134	-1.42749e-06	119184
4035.02	-0.165209	-2.30108e-06	71796		4035.02	-0.165052	-1.71827e-06	96057.2		4035.02	-0.16513	-1.38635e-06	119111
4040.01	-0.160126	-2.24267e-06	71399.6		4040.01	-0.160126	-1.6652e-06	96160.3		4040.01	-0.160126	-1.34333e-06	119201
4045.01	-0.155122	-2.17485e-06	71325.4		4045.01	-0.155044	-1.61464e-06	96023.5		4045.01	-0.1552	-1.29843e-06	119529
4050	-0.150118	-2.09226e-06	71749		4050	-0.150118	-1.54839e-06	96951.1		4050	-0.150196	-1.25635e-06	119549
4054.99	-0.145192	-2.02286e-06	71775.3		4054.99	-0.145192	-1.50411e-06	96530		4054.99	-0.145114	-1.21427e-06	119507
4059.98	-0.140109	-1.96006e-06	71482.2		4059.98	-0.140031	-1.44884e-06	96650.4		4059.98	-0.140109	-1.17408e-06	119336
4064.97	-0.135105	-1.87999e-06	71865		4064.97	-0.135105	-1.38887e-06	97277.3		4064.97	-0.135262	-1.13043e-06	119655
4069.97	-0.130179	-1.81122e-06	71873.9		4069.97	-0.130101	-1.34333e-06	96849.4		4069.97	-0.130101	-1.08584e-06	119816
4074.96	-0.125175	-1.74276e-06	71825.6		4074.96	-0.125097	-1.29183e-06	96836.5		4074.96	-0.125175	-1.04847e-06	119388
4079.95	-0.120171	-1.67274e-06	71840.9		4079.95	-0.120014	-1.23217e-06	97400.7		4079.95	-0.120171	-1.00388e-06	119706
4084.94	-0.115167	-1.59737e-06	72097.5		4084.94	-0.115167	-1.18695e-06	97027.1		4084.94	-0.115167	-9.58036e-07	120211
4089.93	-0.110241	-1.53834e-06	71662.2		4089.93	-0.110084	-1.1342e-06	97059		4089.93	-0.110084	-9.2004e-07	119652
4094.93	-0.105158	-1.46486e-06	71787.3		4094.93	-0.10508	-1.08333e-06	96997.4		4094.93	-0.105236	-8.7545e-07	120208
4099.92	-0.100154	-1.39797e-06	71642.4		4099.92	-0.100076	-1.02524e-06	97612.6		4099.92	-0.100154	-8.31801e-07	120406
4104.91	-0.0951498	-1.33454e-06	71297.8		4104.91	-0.0950716	-9.76563e-07	97353.3		4104.91	-0.0951498	-7.87525e-07	120821
4109.9	-0.0902238	-1.26012e-06	71599.4		4109.9	-0.0900675	-9.23494e-07	97529		4109.9	-0.0901456	-7.44819e-07	121030
4114.89	-0.0852196	-1.18664e-06	71816		4114.89	-0.0851415	-8.71681e-07	97675		4114.89	-0.0851415	-7.03683e-07	120994
4119.89	-0.0801373	-1.10719e-06	72378.7		4119.89	-0.0801373	-8.22381e-07	97445.4		4119.89	-0.0801373	-6.61291e-07	121183
4124.88	-0.0751331	-1.04784e-06	71702.5		4124.88	-0.0750549	-7.6994e-07	97481.4		4124.88	-0.0751331	-6.19841e-07	121214
4129.87	-0.0700507	-9.80017e-07	71479.1		4129.87	-0.0701289	-7.20954e-07	97272.4		4129.87	-0.0701289	-5.80589e-07	120789
4134.86	-0.0651247	-9.11561e-07	71443		4134.86	-0.0651247	-6.66943e-07	97646.5		4134.86	-0.0651247	-5.39139e-07	120794
4139.85	-0.0601205	-8.39338e-07	71628.5		4139.85	-0.0601205	-6.1356e-07	97986.3		4139.85	-0.0601205	-4.95176e-07	121412
4144.85	-0.0551163	-7.6366e-07	72173.9		4144.85	-0.0551163	-5.62376e-07	98006.2		4144.85	-0.0551163	-4.5404e-07	121391
4149.84	-0.0501121	-6.94576e-07	72147.7		4149.84	-0.0501121	-5.11505e-07	97969.9		4149.84	-0.0501903	-4.14788e-07	121002
4154.83	-0.0451861	-6.26749e-07	72096		4154.83	-0.0451079	-4.58123e-07	98462.6		4154.83	-0.0451861	-3.71768e-07	121544
4159.82	-0.0401819	-5.60806e-07	71650.3		4159.82	-0.0401037	-4.08194e-07	98246.8		4159.82	-0.0401037	-3.2969e-07	121641
4164.81	-0.0351777	-4.85128e-07	72512.3		4164.81	-0.0350995	-3.57009e-07	98315.5		4164.81	-0.0350995	-2.87926e-07	121905
4169.81	-0.0301735	-4.1573e-07	72579.6		4169.81	-0.0301735	-3.06139e-07	98561.6		4169.81	-0.0301735	-2.46162e-07	122576
4174.8	-0.0251694	-3.48217e-07	72280.7		4174.8	-0.0250912	-2.53698e-07	98901.6		4174.8	-0.0251694	-2.06282e-07	122014
4179.79	-0.020087	-2.76935e-07	72533.1		4179.79	-0.020087	-2.022e-07	99342.3		4179.79	-0.0201652	-1.64204e-07	122806
4184.78	-0.0150828	-2.07224e-07	72785		4184.78	-0.0150828	-1.52271e-07	99052.2		4184.78	-0.015161	-1.23068e-07	123192
4189.77	-0.0101568	-1.37198e-07	74030		4189.77	-0.0100786	-9.98304e-08	100957		4189.77	-0.0100786	-8.07969e-08	124740
4194.77	-0.00507441	-6.65434e-08	76257.1		4194.77	-0.00507441	-4.80201e-08	105672		4194.77	-0.00507441	-3.91666e-08	129559
4199.76	-0.000148406	2.95116e-09	-50287.3		4199.76	7.97493e-06	2.26353e-09	3523.23		4199.76	-7.02155e-05	1.88393e-09	-37270.8
4204.75	0.00477759	7.17894e-08	66550.1		4204.75	0.00485578	5.40104e-08	89904.5		4204.75	0.00485578	4.30705e-08	112740
4209.74	0.00985997	1.40289e-07	70283.2		4209.74	0.00985997	1.04279e-07	94554		4209.74	0.00993817	8.42291e-08	117990
4214.73	0.014786	2.09045e-07	70731		4214.73	0.0149424	1.52125e-07	98224		4214.73	0.0149424	1.25219e-07	119329
4219.73	0.0197902	2.79371e-07	70838.4		4219.73	0.0198684	2.01856e-07	98428.6		4219.73	0.0198684	1.6619e-07	119552
4224.72	0.0248725	3.46494e-07	71783.5		4224.72	0.0249507	2.49953e-07	99821.6		4224.72	0.0248725	2.07758e-07	119719
4229.71	0.0298767	4.139e-07	72183.5		4229.71	0.0299549	3.03325e-07	98755.1		4229.71	0.0299549	2.4942e-07	120099
4234.7	0.0348027	4.81588e-07	72266.6		4234.7	0.0348809	3.49696e-07	99746.3		4234.7	0.0349591	2.92996e-07	119316
4239.69	0.0398851	5.51631e-07	72303.9		4239.69	0.0398851	4.03477e-07	98853.6		4239.69	0.0399633	3.33496e-07	119831
4244.69	0.0448111	6.19069e-07	72384.7		4244.69	0.0448893	4.49942e-07	99766.9		4244.69	0.0448893	3.73525e-07	120177
4249.68	0.0497371	6.91121e-07	71965.9		4249.68	0.0499717	5.01462e-07	99652.1		4249.68	0.0498935	4.16725e-07	119727
4254.67	0.0548977	7.57679e-07	72455.1		4254.67	0.0548977	5.52039e-07	99445.2		4254.67	0.0549759	4.57194e-07	120246
4259.66	0.0597455	8.25116e-07	72408.6		4259.66	0.0599019	6.03277e-07	99294.2		4259.66	0.0599801	4.97255e-07	120622
4264.65	0.0648279	8.98425e-07	72157.3		4264.65	0.0649061	6.50244e-07	99818		4264.65	0.0649061	5.38634e-07	120501
4269.65	0.0699103	9.7032e-07	72048.7		4269.65	0.0699103	6.98719e-07	100055		4269.65	0.0699103	5.78286e-07	120892
4274.64	0.0748363	1.03973e-06	71976.4		4274.64	0.0749144	7.54916e-07	99235.4		4274.64	0.0749926	6.22051e-07	120557
4279.63	0.0798405	1.10882e-06	72005.1		4279.63	0.0799186	8.01821e-07	99671.4		4279.63	0.0799186	6.63964e-07	120366
4284.62	0.0849228	1.17916e-06	72020		4284.62	0.0849228	8.53215e-07	99532.7		4284.62	0.0849228	7.02455e-07	120894
4289.61	0.089927	1.25421e-06	71700.3		4289.61	0.0898488	9.01627e-07	99651.9		4289.61	0.089927	7.44901e-07	120723
4294.61	0.094853	1.31513e-06	72124.7		4294.61	0.0949312	9.47025e-07	100242		4294.61	0.0949312	7.87725e-07	120513
4299.6	0.0999354	1.38641e-06	72082.3		4299.6	0.0998572	1.00423e-06	99436.9		4299.6	0.0999354	8.28162e-07	120671
4304.59	0.104861	1.46083e-06	71782.1		4304.59	0.104861	1.04633e-06	100219		4304.59	0.105018	8.72398e-07	120378
4309.58	0.109944	1.52332e-06	72173.9		4309.58	0.109866	1.10693e-06	99252.3		4309.58	0.109944	9.11297e-07	120645
4314.57	0.11487	1.59177e-06	72164.7		4314.57	0.114948	1.16283e-06	98852.1		4314.57	0.114948	9.50823e-07	120893
4319.57	0.119796	1.65866e-06	72224.5		4319.57	0.119952	1.20616e-06	99449.5		4319.57	0.119952	9.95311e-07	120517
4324.56	0.124956	1.73559e-06	71996.4		4324.56	0.124878	1.26363e-06	98825.2		4324.56	0.124956	1.04193e-06	119928
4329.55	0.129882	1.80028e-06	72145.6		4329.55	0.129961	1.30445e-06	99628.7		4329.55	0.129961	1.08621e-06	119646
4334.54	0.134887	1.87753e-06	71842.6		4334.54	0.134887	1.35689e-06	99408.7		4334.54	0.134965	1.12138e-06	120356
4339.53	0.139813	1.93531e-06	72243.1		4339.53	0.139969	1.39991e-06	99984.3		4339.53	0.139969	1.16691e-06	119948
4344.53	0.144817	2.01758e-06	71777.5		4344.53	0.144973	1.45706e-06	99497		4344.53	0.144973	1.20648e-06	120162
4349.52	0.149821	2.08917e-06	71713		4349.52	0.149899	1.50636e-06	99510.8		4349.52	0.149977	1.24259e-06	120698
4354.51	0.154903	2.13157e-06	72671.1		4354.51	0.154903	1.55378e-06	99694.7		4354.51	0.154903	1.28843e-06	120226
4359.5	0.159907	2.20536e-06	72508.6		4359.5	0.159986	1.61878e-06	98831.1		4359.5	0.159907	1.33208e-06	120043
4364.49	0.164912	2.30271e-06	71616.5		4364.49	0.164912	1.66619e-06	98975		4364.49	0.164912	1.37918e-06	119572
4369.49	0.169916	2.37116e-06	71659.4		4369.49	0.169916	1.71016e-06	99356.9		4369.49	0.169916	1.41059e-06	120458
4374.48	0.17492	2.43177e-06	71931.3		4374.48	0.17492	1.76699e-06	98993		4374.48	0.174998	1.45361e-06	120389
4379.47	0.179846	2.49017e-06	72222.3		4379.47	0.179924	1.82477e-06	98600.9		4379.47	0.180002	1.50228e-06	119820
4384.46	0.18485	2.5693e-06	71945.6		4384.46	0.184928	1.87502e-06	98627.7		4384.46	0.184928	1.54655e-06	119574
4389.45	0.189854	2.63682e-06	72001.3		4389.45	0.189854	1.91521e-06	99129.9		4389.45	0.189933	1.58801e-06	119605
4394.45	0.194859	2.74296e-06	71039.7		4394.45	0.194859	1.96043e-06	99396		4394.45	0.194937	1.62977e-06	119610
4399.44	0.199863	2.78001e-06	71892.9		4399.44	0.199941	2.02637e-06	98669.5		4399.44	0.199941	1.67467e-06	119391
4400.08	0.200097	2.79697e-06	71540.9		4400.08	0.200176	2.0204e-06	99077		4400.08	0.200176	1.6753e-06	119486
4405.07	0.194859	2.74421e-06	71007.1		4405.07	0.194937	1.96577e-06	99165.8		4405.07	0.195015	1.62631e-06	119912
4410.06	0.189933	2.65817e-06	71452.4		4410.06	0.190089	1.91427e-06	99301.2		4410.06	0.190089	1.5811e-06	120226
4415.05	0.184928	2.56491e-06	72099.4		4415.05	0.184928	1.86497e-06	99159.1		4415.05	0.185085	1.54875e-06	119506
4420.04	0.179924	2.50179e-06	71918.2		4420.04	0.180002	1.81284e-06	99293		4420.04	0.180081	1.49977e-06	120072
4425.04	0.17492	2.42957e-06	71996.4		4425.04	0.175076	1.75852e-06	99559.2		4425.04	0.17492	1.45832e-06	119947
4430.03	0.169916	2.3451e-06	72455.8		4430.03	0.169994	1.70356e-06	99787.4		4430.03	0.169994	1.41592e-06	120059
4435.02	0.164912	2.27287e-06	72556.5		4435.02	0.16499	1.65834e-06	99490.7		4435.02	0.16499	1.36819e-06	120590
4440.01	0.159986	2.2085e-06	72440.9		4440.01	0.159986	1.61407e-06	99119.5		4440.01	0.159986	1.3393e-06	119454
4445	0.154981	2.13722e-06	72515.5		4445	0.154903	1.55409e-06	99674.5		4445	0.154903	1.29e-06	120080
4450	0.149899	2.06876e-06	72458.3		4450	0.149977	1.50479e-06	99666.6		4450	0.149977	1.24918e-06	120060
4454.99	0.144895	1.99246e-06	72721.7		4454.99	0.145051	1.45549e-06	99658		4454.99	0.144973	1.20899e-06	119913
4459.98	0.139891	1.91772e-06	72946.3		4459.98	0.140047	1.41341e-06	99084.4		4459.98	0.139969	1.16817e-06	119819
4464.97	0.134965	1.85743e-06	72662.1		4464.97	0.135043	1.34778e-06	100196		4464.97	0.134965	1.12138e-06	120356
4469.96	0.129961	1.78615e-06	72760.2		4469.96	0.129961	1.30256e-06	99772.8		4469.96	0.129961	1.08527e-06	119750
4474.96	0.124956	1.72931e-06	72257.8		4474.96	0.124956	1.24541e-06	100333		4474.96	0.124956	1.04099e-06	120036
4479.95	0.119874	1.65583e-06	72395		4479.95	0.12003	1.19643e-06	100324		4479.95	0.12003	9.98283e-07	120237
4484.94	0.114948	1.58738e-06	72413.8		4484.94	0.115026	1.14995e-06	100027		4484.94	0.115026	9.56205e-07	120294
4489.93	0.110022	1.51641e-06	72554.3		4489.93	0.109944	1.10159e-06	99804.2		4489.93	0.110022	9.19151e-07	119700
4494.92	0.10494	1.44167e-06	72790.1		4494.92	0.10494	1.0457e-06	100353		4494.92	0.105018	8.75189e-07	119994
4499.92	0.0998572	1.37102e-06	72834.2		4499.92	0.100014	1.0008e-06	99934.1		4499.92	0.0999354	8.36251e-07	119504
4504.91	0.094853	1.30319e-06	72785.1		4504.91	0.0950094	9.53065e-07	99688.3		4504.91	0.0949312	7.91033e-07	120009
4509.9	0.089927	1.23851e-06	72609.3		4509.9	0.089927	8.92146e-07	100799		4509.9	0.089927	7.48013e-07	120221
4514.89	0.0849228	1.16597e-06	72834.6		4514.89	0.085001	8.48498e-07	100178		4514.89	0.085001	7.04364e-07	120678
4519.88	0.0799186	1.10097e-06	72589.5		4519.88	0.0799968	7.89777e-07	101290		4519.88	0.0799968	6.6417e-07	120446
4524.88	0.0749144	1.03125e-06	72644		4524.88	0.0749926	7.41732e-07	101105		4524.88	0.0749926	6.2586e-07	119823
4529.87	0.0699103	9.61857e-07	72682.6		4529.87	0.0699885	6.98712e-07	100168		4529.87	0.0699103	5.80014e-07	120532
4534.86	0.0649061	8.94972e-07	72523		4534.86	0.0649843	6.47527e-07	100358		4534.86	0.0649843	5.40134e-07	120311
4539.85	0.0599019	8.26516e-07	72475.1		4539.85	0.0600583	5.96029e-07	100764		4539.85	0.0600583	4.98998e-07	120358
4544.84	0.0549759	7.61829e-07	72163		4544.84	0.0549759	5.4453e-07	100960		4544.84	0.0549759	4.56606e-07	120401
4549.84	0.0498935	6.9149e-07	72153.6		4549.84	0.0499717	4.93346e-07	101291		4549.84	0.0499717	4.16412e-07	120005
4554.83	0.0448893	6.23662e-07	71977		4554.83	0.0449675	4.46557e-07	100698		4554.83	0.0450457	3.76218e-07	119733
4559.82	0.0398851	5.56463e-07	71676.2		4559.82	0.0399633	3.94117e-07	101400		4559.82	0.0399633	3.3414e-07	119601
4564.81	0.0348809	4.83925e-07	72079.2		4564.81	0.0349591	3.47014e-07	100743		4564.81	0.0350373	2.91433e-07	120224
4569.8	0.0298767	4.19866e-07	71157.8		4569.8	0.0299549	2.974e-07	100723		4569.8	0.0300331	2.50925e-07	119689
4574.8	0.0249507	3.48898e-07	71512.9		4574.8	0.0248725	2.46843e-07	100763		4574.8	0.0250289	2.10103e-07	119127
4579.79	0.0198684	2.78873e-07	71245.2		4579.79	0.0200247	1.98171e-07	101048		4579.79	0.0200247	1.67397e-07	119624
4584.78	0.0149424	2.11673e-07	70591.6		4584.78	0.0149424	1.5044e-07	99324.2		4584.78	0.0149424	1.26889e-07	117759
4589.77	0.00993817	1.41648e-07	70161.1		4589.77	0.0100164	9.98837e-08	100280		4589.77	0.00993817	8.4811e-08	117180
4594.76	0.00485578	7.22503e-08	67207.8		4594.76	0.00501217	5.19113e-08	96552.5		4594.76	0.00501217	4.39997e-08	113914
4599.76	-7.02155e-05	4.07752e-09	-17220.2		4599.76	7.97493e-06	2.82359e-09	2824.39		4599.76	-7.02155e-05	2.75514e-09	-25485.3
4604.75	-0.00507441	-6.50159e-08	78048.7		4604.75	-0.00499622	-4.55349e-08	109723		4604.75	-0.00499622	-3.84159e-08	130056
4609.74	-0.0100786	-1.33886e-07	75277.2		4609.74	-0.0100004	-9.56016e-08	104605		4609.74	-0.00992222	-7.9926e-08	124142
4614.73	-0.0150828	-2.02203e-07	74592.4		4614.73	-0.0150828	-1.43179e-07	105342		4614.73	-0.0150046	-1.21266e-07	123733
4619.72	-0.0201652	-2.71838e-07	74180.9		4619.72	-0.0200088	-1.93318e-07	103502		4619.72	-0.0200088	-1.62802e-07	122903
4624.72	-0.0250912	-3.40656e-07	73655.4		4624.72	-0.025013	-2.42703e-07	103060		4624.72	-0.025013	-2.03427e-07	122958
4629.71	-0.0300172	-4.10762e-07	73076.8		4629.71	-0.0300172	-2.89827e-07	103569		4629.71	-0.0300172	-2.44461e-07	122789
4634.7	-0.0350995	-4.76284e-07	73694.5		4634.7	-0.0350995	-3.3962e-07	103349		4634.7	-0.0350214	-2.8493e-07	122912
4639.69	-0.0400255	-5.47395e-07	73120.1		4639.69	-0.0399474	-3.87749e-07	103024		4639.69	-0.0400255	-3.26528e-07	122579
4644.68	-0.0451079	-6.21927e-07	72529.2		4644.68	-0.0450297	-4.37166e-07	103004		4644.68	-0.0451079	-3.67813e-07	122638
4649.68	-0.0501121	-6.91908e-07	72426		4649.68	-0.0499557	-4.85577e-07	102879		4649.68	-0.0501121	-4.09475e-07	122381
4654.67	-0.0551945	-7.54133e-07	73189.3		4654.67	-0.0549599	-5.34272e-07	102869		4654.67	-0.0550381	-4.50728e-07	122109
4659.66	-0.0601205	-8.33061e-07	72168.2		4659.66	-0.0600423	-5.86105e-07	102443		4659.66	-0.0600423	-4.95435e-07	121191
4664.65	-0.0651247	-9.00624e-07	72310.6		4664.65	-0.0649683	-6.33795e-07	102507		4664.65	-0.0651247	-5.33267e-07	122124
4669.64	-0.0701289	-9.67685e-07	72470.8		4669.64	-0.0699725	-6.83054e-07	102441		4669.64	-0.0700507	-5.77001e-07	121405
4674.64	-0.0751331	-1.04188e-06	72113.1		4674.64	-0.0750549	-7.34103e-07	102240		4674.64	-0.0750549	-6.18537e-07	121343
4679.63	-0.0800591	-1.11661e-06	71698.1		4679.63	-0.0800591	-7.83457e-07	102187		4679.63	-0.0801373	-6.59068e-07	121592
4684.62	-0.0851415	-1.18193e-06	72036		4684.62	-0.0849851	-8.36578e-07	101587		4684.62	-0.0850633	-7.00416e-07	121447
4689.61	-0.0899893	-1.25258e-06	71843		4689.61	-0.0901456	-8.84361e-07	101933		4689.61	-0.0900675	-7.43051e-07	121213
4694.6	-0.0951498	-1.33109e-06	71482.8		4694.6	-0.0949934	-9.36226e-07	101464		4694.6	-0.0950716	-7.82986e-07	121422
4699.6	-0.100076	-1.40362e-06	71298.2		4699.6	-0.0999976	-9.91137e-07	100892		4699.6	-0.100076	-8.21665e-07	121796
4704.59	-0.10508	-1.46674e-06	71641.8		4704.59	-0.105002	-1.0513e-06	99878.2		4704.59	-0.105002	-8.67125e-07	121092
4709.58	-0.110162	-1.5374e-06	71655.2		4709.58	-0.110006	-1.10123e-06	99894		4709.58	-0.110084	-9.08065e-07	121229
4714.57	-0.115088	-1.61841e-06	71112		4714.57	-0.115088	-1.14864e-06	100195		4714.57	-0.115088	-9.53965e-07	120642
4719.56	-0.120093	-1.68906e-06	71100.1		4719.56	-0.120093	-1.20422e-06	99726.1		4719.56	-0.120014	-9.91671e-07	121022
4724.56	-0.125097	-1.75438e-06	71305.4		4724.56	-0.125097	-1.25509e-06	99671.2		4724.56	-0.125097	-1.04376e-06	119852
4729.55	-0.130023	-1.83194e-06	70975.4		4729.55	-0.130023	-1.30377e-06	99728.5		4729.55	-0.130101	-1.08867e-06	119505
4734.54	-0.135027	-1.88815e-06	71512.8		4734.54	-0.135027	-1.35181e-06	99885.9		4734.54	-0.135027	-1.13169e-06	119315
4739.53	-0.140109	-1.98675e-06	70521.8		4739.53	-0.140031	-1.40865e-06	99408.1		4739.53	-0.140109	-1.17062e-06	119688
4744.52	-0.145114	-2.064e-06	70307		4744.52	-0.145035	-1.46423e-06	99052.3		4744.52	-0.145035	-1.21521e-06	119350
4749.52	-0.15004	-2.13403e-06	70308.2		4749.52	-0.15004	-1.5129e-06	99173.3		4749.52	-0.15004	-1.25415e-06	119634
4754.51	-0.155122	-2.1984e-06	70561.3		4754.51	-0.154966	-1.55718e-06	99516.9		4754.51	-0.155122	-1.30659e-06	118722
4759.5	-0.160126	-2.27188e-06	70481.8		4759.5	-0.160048	-1.61025e-06	99393.4		4759.5	-0.160126	-1.34019e-06	119480
4764.49	-0.16513	-2.35164e-06	70219.3		4764.49	-0.165052	-1.6539e-06	99796		4764.49	-0.165052	-1.38007e-06	119597
4769.48	-0.170134	-2.42386e-06	70191.5		4769.48	-0.170056	-1.71952e-06	98897.3		4769.48	-0.169978	-1.42466e-06	119311
4774.48	-0.175139	-2.48698e-06	70422.3		4774.48	-0.17506	-1.77291e-06	98742.1		4774.48	-0.17506	-1.47553e-06	118642
4779.47	-0.180065	-2.55449e-06	70489.4		4779.47	-0.179986	-1.831e-06	98299.6		4779.47	-0.179986	-1.5195e-06	118451
4784.46	-0.185069	-2.64085e-06	70079.4		4784.46	-0.184991	-1.89066e-06	97844.3		4784.46	-0.184991	-1.56974e-06	117848
4789.45	-0.190073	-2.70082e-06	70376		4789.45	-0.190073	-1.93274e-06	98343.8		4789.45	-0.190073	-1.61276e-06	117856
4794.44	-0.195077	-2.78969e-06	69927.9		4794.44	-0.194921	-1.99178e-06	97862.8		4794.44	-0.195077	-1.65609e-06	117794
4799.44	-0.20016	-2.83868e-06	70511.6		4799.44	-0.200081	-2.05207e-06	97502.4		4799.44	-0.200081	-1.69409e-06	118106
4800.08	-0.200316	-2.8459e-06	70387.6		4800.08	-0.200394	-2.04453e-06	98014.8		4800.08	-0.200316	-1.70194e-06	117699
4805.07	-0.195234	-2.76583e-06	70587.8		4805.07	-0.195077	-2.00434e-06	97327.6		4805.07	-0.195155	-1.64604e-06	118560
4810.06	-0.190151	-2.71966e-06	69917.2		4810.06	-0.190073	-1.93965e-06	97993.5		4810.06	-0.190151	-1.59988e-06	118853
4815.05	-0.185147	-2.65184e-06	69818.4		4815.05	-0.185069	-1.88281e-06	98293.8		4815.05	-0.185147	-1.55875e-06	118779
4820.04	-0.180221	-2.56957e-06	70136.8		4820.04	-0.180065	-1.81342e-06	99295.9		4820.04	-0.180065	-1.51855e-06	118576
4825.04	-0.17506	-2.49671e-06	70116.4		4825.04	-0.17506	-1.76788e-06	99022.7		4825.04	-0.175139	-1.4793e-06	118393
4830.03	-0.170056	-2.42575e-06	70104.7		4830.03	-0.170056	-1.71764e-06	99005.8		4830.03	-0.170134	-1.4344e-06	118610
4835.02	-0.16513	-2.36263e-06	69892.6		4835.02	-0.16513	-1.66803e-06	98997.5		4835.02	-0.16513	-1.39577e-06	118307
4840.01	-0.160204	-2.28727e-06	70041.9		4840.01	-0.160126	-1.61401e-06	99209.8		4840.01	-0.160126	-1.34836e-06	118756
4845	-0.155122	-2.20279e-06	70420.5		4845	-0.155122	-1.55435e-06	99798.4		4845	-0.1552	-1.30283e-06	119126
4850	-0.150118	-2.13246e-06	70396.7		4850	-0.15004	-1.50694e-06	99566		4850	-0.150118	-1.26734e-06	118451
4854.99	-0.145192	-2.06149e-06	70430.6		4854.99	-0.145114	-1.45701e-06	99597		4854.99	-0.145114	-1.22652e-06	118313
4859.98	-0.140188	-1.98141e-06	70751.3		4859.98	-0.140109	-1.40676e-06	99596.9		4859.98	-0.140031	-1.17753e-06	118919
4864.97	-0.135105	-1.89663e-06	71234.4		4864.97	-0.135105	-1.35401e-06	99781.5		4864.97	-0.135027	-1.1342e-06	119051
4869.96	-0.130179	-1.83759e-06	70842.2		4869.96	-0.130101	-1.30377e-06	99788.5		4869.96	-0.130179	-1.09714e-06	118653
4874.96	-0.125097	-1.76035e-06	71063.7		4874.96	-0.125097	-1.25321e-06	99821		4874.96	-0.125175	-1.04753e-06	119495
4879.95	-0.120093	-1.7145e-06	70045.2		4879.95	-0.120093	-1.20768e-06	99440.9		4879.95	-0.120093	-1.00765e-06	119181
4884.94	-0.115088	-1.63411e-06	70428.7		4884.94	-0.115088	-1.15147e-06	99949.1		4884.94	-0.115088	-9.65258e-07	119231
4889.93	-0.110084	-1.55875e-06	70623.5		4889.93	-0.110084	-1.10311e-06	99794.3		4889.93	-0.110162	-9.2475e-07	119127
4894.92	-0.10508	-1.47648e-06	71169.5		4894.92	-0.105158	-1.05287e-06	99877.8		4894.92	-0.10508	-8.85812e-07	118626
4899.92	-0.100076	-1.41493e-06	70728.5		4899.92	-0.100076	-9.97916e-07	100285		4899.92	-0.100154	-8.42478e-07	118880
4904.91	-0.0949934	-1.34961e-06	70385.7		4904.91	-0.0950716	-9.46731e-07	100421		4904.91	-0.0951498	-7.99772e-07	118971
4909.9	-0.0901456	-1.27331e-06	70796.4		4909.9	-0.0900675	-8.95861e-07	100537		4909.9	-0.0901456	-7.56752e-07	119122
4914.89	-0.0850633	-1.19606e-06	71119.6		4914.89	-0.0851415	-8.4185e-07	101136		4914.89	-0.0851415	-7.17186e-07	118716
4919.88	-0.0800591	-1.12823e-06	70959.7		4919.88	-0.0800591	-7.91293e-07	101175		4919.88	-0.0801373	-6.73537e-07	118980
4924.88	-0.0751331	-1.06166e-06	70769.4		4924.88	-0.0750549	-7.42935e-07	101025		4924.88	-0.0752113	-6.28633e-07	119643
4929.87	-0.0700507	-9.82215e-07	71319.1		4929.87	-0.0700507	-6.99601e-07	100130		4929.87	-0.0701289	-5.88125e-07	119241
4934.86	-0.0650465	-9.1219e-07	71308.1		4934.86	-0.0651247	-6.45904e-07	100827		4934.86	-0.0651247	-5.44477e-07	119610
4939.85	-0.0600423	-8.45304e-07	71030.4		4939.85	-0.0601205	-5.96604e-07	100771		4939.85	-0.0601205	-5.02085e-07	119742
4944.84	-0.0550381	-7.70254e-07	71454.5		4944.84	-0.0551163	-5.43221e-07	101462		4944.84	-0.0551945	-4.61263e-07	119660
4949.84	-0.0501121	-7.03997e-07	71182.3		4949.84	-0.0501121	-4.95176e-07	101201		4949.84	-0.0501121	-4.20127e-07	119279
4954.83	-0.0451861	-6.35227e-07	71133.8		4954.83	-0.0451079	-4.40538e-07	102393		4954.83	-0.0451079	-3.7742e-07	119516
4959.82	-0.0401037	-5.58608e-07	71792.3		4959.82	-0.0401037	-3.91551e-07	102423		4959.82	-0.0401819	-3.36284e-07	119488
4964.81	-0.0350995	-4.90152e-07	71609.5		4964.81	-0.0350995	-3.44135e-07	101994		4964.81	-0.0350995	-2.9295e-07	119814
4969.8	-0.0300172	-4.19813e-07	71501.4		4969.8	-0.0301735	-2.91694e-07	103442		4969.8	-0.0300954	-2.51186e-07	119813
4974.8	-0.0250912	-3.50415e-07	71604.1		4974.8	-0.0250912	-2.45534e-07	102190		4974.8	-0.0251694	-2.09422e-07	120185
4979.79	-0.0200088	-2.79447e-07	71601.2		4979.79	-0.0201652	-1.96233e-07	102761		4979.79	-0.0201652	-1.66716e-07	120955
4984.78	-0.0150828	-2.09422e-07	72021		4984.78	-0.015161	-1.45677e-07	104073		4984.78	-0.015161	-1.25266e-07	121031
4989.77	-0.0100004	-1.37826e-07	72558		4989.77	-0.0100786	-9.70042e-08	103899		4989.77	-0.010235	-8.21155e-08	124641
4994.76	-0.00507441	-6.58213e-08	77093.7		4994.76	-0.0051526	-4.62306e-08	111454		4994.76	-0.0051526	-3.97945e-08	129480
4999.76	7.97493e-06	4.27665e-09	1864.76		4999.76	-7.02155e-05	1.99594e-09	-35179.2		4999.76	-7.02155e-05	1.88393e-09	-37270.8
5004.75	0.00493397	7.43781e-08	66336.3		5004.75	0.00485578	5.1235e-08	94774.7		5004.75	0.00485578	4.39915e-08	110380
5009.74	0.0100164	1.45407e-07	68885.1		5009.74	0.0100164	9.92513e-08	100919		5009.74	0.00978178	8.59279e-08	113837
5014.73	0.0149424	2.14633e-07	69618		5014.73	0.0148642	1.47761e-07	100596		5014.73	0.0148642	1.27449e-07	116629
5019.72	0.0199465	2.85556e-07	69851.7		5019.72	0.0198684	1.96173e-07	101280		5019.72	0.0199465	1.69236e-07	117862
5024.72	0.0249507	3.56635e-07	69961.6		5024.72	0.0247944	2.45495e-07	100997		5024.72	0.0248725	2.11525e-07	117587
5029.71	0.0300331	4.2448e-07	70752.7		5029.71	0.0299549	2.93844e-07	101942		5029.71	0.0299549	2.53784e-07	118033
5034.7	0.0349591	4.95057e-07	70616.4		5034.7	0.0348809	3.41722e-07	102074		5034.7	0.0348809	2.94346e-07	118503
5039.69	0.0399633	5.59888e-07	71377.3		5039.69	0.0399633	3.88972e-07	102741		5039.69	0.0398069	3.35223e-07	118748
5044.68	0.0449675	6.29586e-07	71423.9		5044.68	0.0448111	4.36724e-07	102607		5044.68	0.0448111	3.79365e-07	118121
5049.68	0.0499717	6.94104e-07	71994.6		5049.68	0.0498935	4.88652e-07	102104		5049.68	0.0498935	4.21435e-07	118390
5054.67	0.0549759	7.63425e-07	72012.2		5054.67	0.0548977	5.33171e-07	102965		5054.67	0.0548195	4.62939e-07	118416
5059.66	0.0599801	8.28633e-07	72384.4		5059.66	0.0598237	5.85067e-07	102251		5059.66	0.0599019	5.02937e-07	119104
5064.65	0.0649061	9.00277e-07	72095.7		5064.65	0.0649843	6.29272e-07	103269		5064.65	0.0648279	5.45195e-07	118908
5069.64	0.0699885	9.7054e-07	72112.9		5069.64	0.0698321	6.81012e-07	102542		5069.64	0.0699103	5.85507e-07	119401
5074.64	0.0749144	1.05386e-06	71085.5		5074.64	0.0749144	7.26723e-07	103085		5074.64	0.0748363	6.26917e-07	119372
5079.63	0.0799186	1.11887e-06	71428.3		5079.63	0.0798405	7.69798e-07	103716		5079.63	0.0799186	6.69835e-07	119311
5084.62	0.0849228	1.18544e-06	71638.4		5084.62	0.0849228	8.2317e-07	103166		5084.62	0.0848446	7.13443e-07	118923
5089.61	0.0898488	1.25578e-06	71548.4		5089.61	0.089927	8.72084e-07	103117		5089.61	0.0898488	7.53095e-07	119306
5094.6	0.0950094	1.31952e-06	72002.9		5094.6	0.0949312	9.21155e-07	103057		5094.6	0.094853	7.98085e-07	118851
5099.6	0.0999354	1.40085e-06	71339		5099.6	0.0998572	9.70289e-07	102915		5099.6	0.099779	8.38365e-07	119016
5104.59	0.10494	1.46805e-06	71482.3		5104.59	0.104861	1.02843e-06	101963		5104.59	0.104861	8.79336e-07	119251
5109.58	0.109866	1.55095e-06	70837.6		5109.58	0.109944	1.07176e-06	102582		5109.58	0.109866	9.23478e-07	118969
5114.57	0.114948	1.60779e-06	71494.5		5114.57	0.11487	1.12012e-06	102551		5114.57	0.11487	9.62346e-07	119364
5119.56	0.119952	1.69948e-06	70581.7		5119.56	0.119874	1.16754e-06	102672		5119.56	0.119874	1.00137e-06	119710
5124.56	0.124956	1.77516e-06	70391.7		5124.56	0.124878	1.21872e-06	102466		5124.56	0.124878	1.04476e-06	119528
5129.55	0.129882	1.83922e-06	70618.3		5129.55	0.129882	1.27305e-06	102025		5129.55	0.129882	1.08244e-06	119990
5134.54	0.134965	1.91395e-06	70516.2		5134.54	0.134887	1.31701e-06	102419		5134.54	0.134887	1.12546e-06	119850
5139.53	0.139891	1.98115e-06	70610.8		5139.53	0.139969	1.37071e-06	102114		5139.53	0.139813	1.17602e-06	118887
5144.52	0.144895	2.05306e-06	70575		5144.52	0.144973	1.41749e-06	102274		5144.52	0.144973	1.20522e-06	120288
5149.52	0.149977	2.1121e-06	71008.7		5149.52	0.149977	1.45706e-06	102931		5149.52	0.149899	1.25389e-06	119547
5154.51	0.154981	2.18652e-06	70880.5		5154.51	0.154981	1.51641e-06	102203		5154.51	0.154903	1.29848e-06	119296
5159.5	0.159907	2.26e-06	70755.6		5159.5	0.159907	1.56916e-06	101906		5159.5	0.159907	1.3415e-06	119200
5164.49	0.16499	2.34102e-06	70477.9		5164.49	0.16499	1.61941e-06	101883		5164.49	0.164834	1.38578e-06	118946
5169.48	0.169916	2.41889e-06	70245.4		5169.48	0.169916	1.66368e-06	102132		5169.48	0.169838	1.42817e-06	118920
5174.48	0.17492	2.48389e-06	70421.8		5174.48	0.174998	1.71769e-06	101880		5174.48	0.174764	1.47213e-06	118715
5179.47	0.179924	2.53696e-06	70921.2		5179.47	0.179846	1.76511e-06	101889		5179.47	0.179846	1.51986e-06	118330
5184.46	0.184928	2.6073e-06	70927.2		5184.46	0.184928	1.81253e-06	102028		5184.46	0.184928	1.56037e-06	118516
5189.45	0.189933	2.69051e-06	70593.4		5189.45	0.189933	1.87125e-06	101501		5189.45	0.189854	1.60214e-06	118501
5194.44	0.194859	2.77027e-06	70339.1		5194.44	0.194859	1.92651e-06	101146		5194.44	0.194859	1.6326e-06	119355
5199.44	0.199941	2.83151e-06	70612.9		5199.44	0.199863	1.96828e-06	101542		5199.44	0.199941	1.6932e-06	118085
5200.08	0.200176	2.84627e-06	70329.2		5200.08	0.200176	1.96388e-06	101929		5200.08	0.200097	1.69163e-06	118287
5205.07	0.194937	2.75646e-06	70720		5205.07	0.194937	1.90987e-06	102068		5205.07	0.194937	1.6596e-06	117460
5210.06	0.190011	2.69303e-06	70556.6		5210.06	0.190011	1.86277e-06	102005		5210.06	0.190011	1.60371e-06	118482
5215.05	0.184928	2.6117e-06	70807.8		5215.05	0.185007	1.80625e-06	102426		5215.05	0.184928	1.56728e-06	117993
5220.05	0.180002	2.53759e-06	70934.4		5220.05	0.180002	1.76888e-06	101761		5220.05	0.179924	1.52175e-06	118235
5225.04	0.174998	2.46285e-06	71055.1		5225.04	0.174998	1.71298e-06	102160		5225.04	0.174998	1.4803e-06	118218
5230.03	0.169994	2.37933e-06	71446.3		5230.03	0.169994	1.66557e-06	102064		5230.03	0.169994	1.43571e-06	118404
5235.02	0.16499	2.31621e-06	71232.8		5235.02	0.16499	1.6125e-06	102319		5235.02	0.16499	1.39583e-06	118202
5240.01	0.159986	2.26126e-06	70750.8		5240.01	0.159986	1.56697e-06	102099		5240.01	0.159907	1.34904e-06	118534
5245.01	0.154981	2.19217e-06	70697.7		5245.01	0.154981	1.51829e-06	102076		5245.01	0.154903	1.30696e-06	118522
5250	0.149977	2.11335e-06	70966.5		5250	0.150055	1.45863e-06	102874		5250	0.149977	1.26174e-06	118865
5254.99	0.144973	2.04615e-06	70851.5		5254.99	0.145051	1.40902e-06	102945		5254.99	0.144895	1.22061e-06	118707
5259.98	0.140047	1.98681e-06	70488.6		5259.98	0.139891	1.35689e-06	103097		5259.98	0.139969	1.18544e-06	118074
5264.97	0.134965	1.90108e-06	70993.8		5264.97	0.134965	1.31607e-06	102552		5264.97	0.134965	1.13959e-06	118433
5269.97	0.129882	1.83168e-06	70908.8		5269.97	0.129961	1.26865e-06	102440		5269.97	0.129961	1.09814e-06	118346
5274.96	0.124956	1.76417e-06	70830.2		5274.96	0.124956	1.20993e-06	103276		5274.96	0.124956	1.05229e-06	118747
5279.95	0.12003	1.69257e-06	70915.9		5279.95	0.12003	1.16691e-06	102862		5279.95	0.119952	1.01336e-06	118371
5284.94	0.114948	1.626e-06	70693.7		5284.94	0.114948	1.11258e-06	103316		5284.94	0.11487	9.73162e-07	118038
5289.93	0.109944	1.55189e-06	70844.9		5289.93	0.110022	1.06642e-06	103169		5289.93	0.109944	9.3077e-07	118121
5294.93	0.10494	1.47841e-06	70981.2		5294.93	0.10494	1.0165e-06	103237		5294.93	0.10494	8.83981e-07	118712
5299.92	0.100092	1.4109e-06	70941.8		5299.92	0.0999354	9.64684e-07	103594		5299.92	0.100014	8.45671e-07	118265
5304.91	0.0950094	1.33836e-06	70989.3		5304.91	0.0949312	9.22919e-07	102860		5304.91	0.0949312	8.02337e-07	118318
5309.9	0.089927	1.27179e-06	70709		5309.9	0.0900052	8.72677e-07	103137		5309.9	0.0900052	7.58689e-07	118633
5314.89	0.085001	1.20051e-06	70804.1		5314.89	0.085001	8.28401e-07	102609		5314.89	0.0849228	7.17239e-07	118402
5319.89	0.0799968	1.1286e-06	70881.5		5319.89	0.0799968	7.72506e-07	103555		5319.89	0.0799968	6.73277e-07	118817
5324.88	0.0749144	1.05983e-06	70685.3		5324.88	0.0749144	7.23205e-07	103587		5324.88	0.0749926	6.31513e-07	118751
5329.87	0.0700666	9.93259e-07	70542.2		5329.87	0.0699885	6.73591e-07	103904		5329.87	0.0699103	5.88178e-07	118859
5334.86	0.0649061	9.16325e-07	70833		5334.86	0.0649843	6.25232e-07	103936		5334.86	0.0649061	5.48612e-07	118310
5339.85	0.0599801	8.49126e-07	70637.4		5339.85	0.0599801	5.76246e-07	104088		5339.85	0.0599019	5.04964e-07	118626
5344.85	0.0549759	7.8067e-07	70421.4		5344.85	0.0549759	5.30086e-07	103711		5344.85	0.0549759	4.63828e-07	118526
5349.84	0.0498935	7.0719e-07	70551.7		5349.84	0.0499717	4.82355e-07	103599		5349.84	0.0500499	4.22692e-07	118407
5354.83	0.0449675	6.37793e-07	70504.9		5354.83	0.0448893	4.35567e-07	103060		5354.83	0.0450457	3.79044e-07	118840
5359.82	0.0400415	5.66825e-07	70641.7		5359.82	0.0400415	3.8815e-07	103160		5359.82	0.0399633	3.38536e-07	118048
5364.81	0.0349591	4.98056e-07	70191.2		5364.81	0.0349591	3.37908e-07	103458		5364.81	0.0349591	2.96144e-07	118048
5369.81	0.0299549	4.27716e-07	70034.6		5369.81	0.0299549	2.90491e-07	103118		5369.81	0.0299549	2.5438e-07	117757
5374.8	0.0249507	3.56435e-07	70000.9		5374.8	0.0250289	2.42133e-07	103369		5374.8	0.0249507	2.11359e-07	118049
5379.79	0.0199465	2.85467e-07	69873.4		5379.79	0.0199465	1.93774e-07	102937		5379.79	0.0199465	1.69595e-07	117613
5384.78	0.0149424	2.15756e-07	69255.9		5384.78	0.0149424	1.46044e-07	102314		5384.78	0.0149424	1.27203e-07	117468
5389.77	0.00993817	1.45102e-07	68490.9		5389.77	0.00993817	9.73716e-08	102064		5389.77	0.00993817	8.5753e-08	115893
5394.77	0.00501217	7.44484e-08	67324		5394.77	0.00493397	5.10322e-08	96683.5		5394.77	0.00493397	4.4345e-08	111263
5399.76	7.97493e-06	4.45089e-09	1791.76		5399.76	7.97493e-06	2.91694e-09	2734.01		5399.76	7.97493e-06	2.53734e-09	3143.03
5404.75	-0.00507441	-6.65156e-08	76289		5404.75	-0.0051526	-4.49935e-08	114519		5404.75	-0.00499622	-3.92809e-08	127192
5409.74	-0.0100004	-1.36712e-07	73149.4		5409.74	-0.0100004	-9.31996e-08	107301		5409.74	-0.0100786	-8.10524e-08	124347
5414.73	-0.0150828	-2.07571e-07	72663.1		5414.73	-0.0150046	-1.40982e-07	106429		5414.73	-0.0150828	-1.2227e-07	123356
5419.73	-0.020087	-2.79121e-07	71965		5419.73	-0.020087	-1.87259e-07	107269		5419.73	-0.020087	-1.63932e-07	122533
5424.72	-0.0250912	-3.48662e-07	71964.1		5424.72	-0.025013	-2.37711e-07	105224		5424.72	-0.025013	-2.06786e-07	120960
5429.71	-0.0300172	-4.19302e-07	71588.5		5429.71	-0.0300954	-2.83109e-07	106303		5429.71	-0.0300954	-2.48354e-07	121179
5434.7	-0.0351777	-4.91291e-07	71602.6		5434.7	-0.0350214	-3.31928e-07	105509		5434.7	-0.0350995	-2.90204e-07	120948
5439.69	-0.0400255	-5.66672e-07	70632.7		5439.69	-0.0400255	-3.82004e-07	104778		5439.69	-0.0399474	-3.28663e-07	121545
5444.69	-0.0451079	-6.32037e-07	71369.2		5444.69	-0.0451079	-4.26491e-07	105765		5444.69	-0.0450297	-3.70984e-07	121379
5449.68	-0.0500339	-7.01546e-07	71319.5		5449.68	-0.0499557	-4.78199e-07	104466		5449.68	-0.0501121	-4.1723e-07	120107
5454.67	-0.0550381	-7.74886e-07	71027.4		5454.67	-0.0551163	-5.24759e-07	105032		5454.67	-0.0550381	-4.61403e-07	119284
5459.66	-0.0601205	-8.43139e-07	71305.5		5459.66	-0.0599641	-5.7452e-07	104372		5459.66	-0.0600423	-5.01181e-07	119802
5464.65	-0.0651247	-9.12052e-07	71404.6		5464.65	-0.0650465	-6.21927e-07	104589		5464.65	-0.0650465	-5.42748e-07	119847
5469.65	-0.0700507	-9.84418e-07	71159.5		5469.65	-0.0699725	-6.71877e-07	104145		5469.65	-0.0700507	-5.87832e-07	119168
5474.64	-0.0750549	-1.05821e-06	70926.5		5474.64	-0.0749767	-7.20854e-07	104011		5474.64	-0.0749767	-6.30655e-07	118887
5479.63	-0.0800591	-1.13357e-06	70625.6		5479.63	-0.0800591	-7.69957e-07	103979		5479.63	-0.0800591	-6.72286e-07	119085
5484.62	-0.0850633	-1.18915e-06	71532.7		5484.62	-0.0849851	-8.14915e-07	104287		5484.62	-0.0850633	-7.12848e-07	119329
5489.61	-0.0900675	-1.27708e-06	70526.3		5489.61	-0.0900675	-8.70704e-07	103442		5489.61	-0.0901456	-7.56551e-07	119153
5494.61	-0.0950716	-1.35056e-06	70394.5		5494.61	-0.0949153	-9.17012e-07	103505		5494.61	-0.0950716	-7.98432e-07	119073
5499.6	-0.100076	-1.41933e-06	70509.4		5499.6	-0.0999976	-9.71264e-07	102956		5499.6	-0.100154	-8.34976e-07	119948
5504.59	-0.10508	-1.49406e-06	70331.8		5504.59	-0.104924	-1.01751e-06	103118		5504.59	-0.10508	-8.76544e-07	119880
5509.58	-0.110006	-1.56754e-06	70177.5		5509.58	-0.110006	-1.07673e-06	102166		5509.58	-0.110006	-9.18457e-07	119773
5514.57	-0.115088	-1.64259e-06	70065.2		5514.57	-0.11501	-1.12729e-06	102024		5514.57	-0.11501	-9.60621e-07	119725
5519.57	-0.120093	-1.7167e-06	69955.6		5519.57	-0.120093	-1.17408e-06	102287		5519.57	-0.120093	-1.01045e-06	118851
5524.56	-0.125097	-1.78829e-06	69953.1		5524.56	-0.125019	-1.22181e-06	102323		5524.56	-0.125019	-1.06135e-06	117792
5529.55	-0.130023	-1.86272e-06	69802.8		5529.55	-0.130023	-1.27142e-06	102266		5529.55	-0.130023	-1.105e-06	117668
5534.54	-0.135027	-1.93306e-06	69851.6		5534.54	-0.135027	-1.32386e-06	101995		5534.54	-0.135105	-1.14488e-06	118009
5539.53	-0.140109	-2.01344e-06	69586.9		5539.53	-0.140031	-1.36626e-06	102493		5539.53	-0.140109	-1.18413e-06	118323
5544.53	-0.145035	-2.08127e-06	69686		5544.53	-0.145035	-1.42247e-06	101961		5544.53	-0.145114	-1.22903e-06	118071
5549.52	-0.15004	-2.14564e-06	69927.5		5549.52	-0.15004	-1.4658e-06	102360		5549.52	-0.15004	-1.2708e-06	118067
5554.51	-0.155044	-2.22478e-06	69689.6		5554.51	-0.155044	-1.51541e-06	102311		5554.51	-0.155122	-1.31664e-06	117816
5559.5	-0.160048	-2.28098e-06	70166.2		5559.5	-0.160048	-1.57099e-06	101877		5559.5	-0.160048	-1.35684e-06	117957
5564.49	-0.165052	-2.36357e-06	69831.7		5564.49	-0.165052	-1.63757e-06	100791		5564.49	-0.16513	-1.39734e-06	118174
5569.49	-0.170056	-2.43768e-06	69761.6		5569.49	-0.170056	-1.67682e-06	101416		5569.49	-0.170056	-1.43942e-06	118142
5574.48	-0.17506	-2.51775e-06	69530.5		5574.48	-0.174982	-1.73868e-06	100641		5574.48	-0.17506	-1.48747e-06	117690
5579.47	-0.180065	-2.58998e-06	69523.7		5579.47	-0.179908	-1.78955e-06	100533		5579.47	-0.180143	-1.52735e-06	117945
5584.46	-0.185069	-2.6509e-06	69813.7		5584.46	-0.184991	-1.84639e-06	100191		5584.46	-0.185069	-1.57445e-06	117545
5589.45	-0.190073	-2.73851e-06	69407.6		5589.45	-0.189995	-1.87653e-06	101248		5589.45	-0.190073	-1.61747e-06	117513
5594.45	-0.194999	-2.80665e-06	69477.6		5594.45	-0.194999	-1.9453e-06	100241		5594.45	-0.195077	-1.65986e-06	117526
5599.44	-0.200081	-2.87322e-06	69636.7		5599.44	-0.200003	-1.98989e-06	100510		5599.44	-0.20016	-1.70382e-06	117477
5600.08	-0.200238	-2.88484e-06	69410.4		5600.08	-0.200316	-1.99586e-06	100366		5600.08	-0.200394	-1.71136e-06	117096
5605.07	-0.195077	-2.80665e-06	69505.4		5605.07	-0.195077	-1.94153e-06	100476		5605.07	-0.195155	-1.66928e-06	116910
5610.06	-0.190151	-2.73034e-06	69643.8		5610.06	-0.190073	-1.8938e-06	100366		5610.06	-0.190151	-1.62344e-06	117129
5615.05	-0.185147	-2.65937e-06	69620.5		5615.05	-0.185147	-1.84168e-06	100532		5615.05	-0.185147	-1.57508e-06	117548
5620.04	-0.180143	-2.58118e-06	69790.8		5620.04	-0.180065	-1.78453e-06	100903		5620.04	-0.180143	-1.53363e-06	117462
5625.04	-0.175139	-2.50865e-06	69814		5625.04	-0.17506	-1.7368e-06	100795		5625.04	-0.175217	-1.48966e-06	117622
5630.03	-0.170134	-2.45307e-06	69355.9		5630.03	-0.170056	-1.67807e-06	101340		5630.03	-0.170213	-1.45041e-06	117355
5635.02	-0.16513	-2.36106e-06	69939.1		5635.02	-0.165052	-1.6316e-06	101160		5635.02	-0.16513	-1.40519e-06	117514
5640.01	-0.160126	-2.29292e-06	69835.1		5640.01	-0.160126	-1.59078e-06	100659		5640.01	-0.160204	-1.36155e-06	117664
5645	-0.155122	-2.21504e-06	70031.2		5645	-0.155122	-1.5374e-06	100899		5645	-0.155122	-1.31853e-06	117648
5650	-0.150196	-2.16448e-06	69391.1		5650	-0.150118	-1.48904e-06	100815		5650	-0.150118	-1.28241e-06	117059
5654.99	-0.145192	-2.07248e-06	70057.1		5654.99	-0.145192	-1.43346e-06	101288		5654.99	-0.145192	-1.24253e-06	116851
5659.98	-0.140188	-2.01439e-06	69593.2		5659.98	-0.140109	-1.37725e-06	101731		5659.98	-0.140188	-1.19606e-06	117208
5664.97	-0.135105	-1.94436e-06	69485.7		5664.97	-0.135105	-1.32418e-06	102029		5664.97	-0.135105	-1.1521e-06	117269
5669.96	-0.130101	-1.87245e-06	69481.7		5669.96	-0.130179	-1.27676e-06	101960		5669.96	-0.130179	-1.11033e-06	117243
5674.96	-0.125097	-1.80085e-06	69465.2		5674.96	-0.125019	-1.22526e-06	102034		5674.96	-0.125175	-1.06637e-06	117384
5679.95	-0.120093	-1.71419e-06	70058.1		5679.95	-0.120093	-1.17125e-06	102533		5679.95	-0.120171	-1.02335e-06	117429
5684.94	-0.115167	-1.64761e-06	69899		5684.94	-0.11501	-1.12729e-06	102024		5684.94	-0.115167	-9.80645e-07	117440
5689.93	-0.110241	-1.57508e-06	69990.6		5689.93	-0.110006	-1.07265e-06	102555		5689.93	-0.110162	-9.39195e-07	117295
5694.92	-0.105158	-1.50882e-06	69695.7		5694.92	-0.10508	-1.02272e-06	102745		5694.92	-0.105236	-8.94919e-07	117593
5699.92	-0.100154	-1.42655e-06	70207.3		5699.92	-0.100154	-9.74993e-07	102723		5699.92	-0.100154	-8.50956e-07	117696
5704.91	-0.0951498	-1.35527e-06	70207.5		5704.91	-0.0949934	-9.29146e-07	102237		5704.91	-0.0951498	-8.09506e-07	117541
5709.9	-0.0901456	-1.28618e-06	70087.8		5709.9	-0.0900675	-8.8016e-07	102331		5709.9	-0.0901456	-7.66486e-07	117609
5714.89	-0.0851415	-1.21993e-06	69792.4		5714.89	-0.0850633	-8.28033e-07	102729		5714.89	-0.0851415	-7.24722e-07	117482
5719.88	-0.0800591	-1.1455e-06	69889.9		5719.88	-0.0800591	-7.80303e-07	102600		5719.88	-0.0801373	-6.7919e-07	117990
5724.88	-0.0751331	-1.06983e-06	70229.3		5724.88	-0.0750549	-7.36969e-07	101843		5724.88	-0.0751331	-6.3617e-07	118102
5729.87	-0.0701289	-9.95718e-07	70430.5		5729.87	-0.0700507	-6.87982e-07	101820		5729.87	-0.0701289	-5.95033e-07	117857
5734.86	-0.0652029	-9.32287e-07	69938.7		5734.86	-0.0650465	-6.33971e-07	102602		5734.86	-0.0651247	-5.51071e-07	118178
5739.85	-0.0601205	-8.59435e-07	69953.5		5739.85	-0.0601205	-5.85299e-07	102718		5739.85	-0.0601987	-5.06167e-07	118931
5744.84	-0.0551945	-7.85955e-07	70226		5744.84	-0.0550381	-5.34742e-07	102925		5744.84	-0.0551945	-4.67857e-07	117973
5749.84	-0.0501121	-7.09649e-07	70615.3		5749.84	-0.0501121	-4.845e-07	103431		5749.84	-0.0501121	-4.25151e-07	117869
5754.83	-0.0450297	-6.3931e-07	70434.9		5754.83	-0.0451079	-4.38654e-07	102833		5754.83	-0.0451861	-3.82445e-07	118151
5759.82	-0.0401037	-5.67714e-07	70640.7		5759.82	-0.0401037	-3.84643e-07	104262		5759.82	-0.0401037	-3.40053e-07	117934
5764.81	-0.0350995	-4.98003e-07	70480.7		5764.81	-0.0350995	-3.36912e-07	104180		5764.81	-0.0351777	-2.97346e-07	118306
5769.8	-0.0301735	-4.27035e-07	70658.3		5769.8	-0.0300954	-2.90438e-07	103621		5769.8	-0.0300954	-2.54954e-07	118042
5774.8	-0.0250912	-3.56067e-07	70467.5		5774.8	-0.0250912	-2.41138e-07	104053		5774.8	-0.0251694	-2.11934e-07	118760
5779.79	-0.020087	-2.84158e-07	70689.5		5779.79	-0.020087	-1.91209e-07	105052		5779.79	-0.020087	-1.69542e-07	118478
5784.78	-0.015161	-2.11934e-07	71536.3		5784.78	-0.0150828	-1.44421e-07	104437		5784.78	-0.015161	-1.26836e-07	119532
5789.77	-0.0100786	-1.3971e-07	72139.2		5789.77	-0.0100786	-9.54342e-08	105608		5789.77	-0.0100786	-8.29318e-08	121529
5794.76	-0.00523079	-6.76422e-08	77330.2		5794.76	-0.0051526	-4.59794e-08	112063		5794.76	-0.0051526	-4.03283e-08	127766
5799.76	-0.000148406	3.19386e-09	-46466.1		5799.76	-7.02155e-05	2.64002e-09	-26596.6		5799.76	-0.000148406	1.96172e-09	-75651.2
5804.75	0.00485578	7.46146e-08	65078.2		5804.75	0.00493397	5.05785e-08	97550.9		5804.75	0.00485578	4.44769e-08	109175
5809.74	0.00985997	1.45689e-07	67678.1		5809.74	0.00985997	9.91268e-08	99468.3		5809.74	0.00993817	8.6961e-08	114283
5814.73	0.014786	2.17647e-07	67935.4		5814.73	0.0148642	1.46506e-07	101458		5814.73	0.0148642	1.29113e-07	115126
5819.72	0.0198684	2.90296e-07	68441.6		5819.72	0.0199465	1.95985e-07	101776		5819.72	0.0198684	1.71528e-07	115832
5824.72	0.0248725	3.60496e-07	68995.3		5824.72	0.0248725	2.42607e-07	102522		5824.72	0.0248725	2.13221e-07	116652
5829.71	0.0297985	4.33302e-07	68770.8		5829.71	0.0299549	2.92243e-07	102500		5829.71	0.0298767	2.55918e-07	116743
5834.7	0.0348027	5.00896e-07	69480.9		5834.7	0.0348809	3.36228e-07	103742		5834.7	0.0348027	2.98522e-07	116584
5839.69	0.0398851	5.73137e-07	69590.9		5839.69	0.0399633	3.82724e-07	104418		5839.69	0.0398851	3.4122e-07	116890
5844.68	0.0449675	6.49585e-07	69225		5844.68	0.0448893	4.29974e-07	104400		5844.68	0.0448893	3.81406e-07	117694
5849.68	0.0498153	7.16802e-07	69496.6		5849.68	0.0499717	4.74744e-07	105260		5849.68	0.0498935	4.25736e-07	117194
5854.67	0.0548195	7.89514e-07	69434.5		5854.67	0.0548195	5.22371e-07	104944		5854.67	0.0548977	4.68308e-07	117226
5859.66	0.0599019	8.60907e-07	69580		5859.66	0.0599019	5.7433e-07	104299		5859.66	0.0599019	5.09876e-07	117483
5864.65	0.0649061	9.31766e-07	69659.2		5864.65	0.0649061	6.1888e-07	104877		5864.65	0.0649061	5.52259e-07	117528
5869.64	0.0699103	1.0015e-06	69805.9		5869.64	0.0699103	6.64906e-07	105143		5869.64	0.0698321	5.94643e-07	117435
5874.64	0.0749144	1.07647e-06	69592.5		5874.64	0.0749144	7.19722e-07	104088		5874.64	0.0748363	6.38471e-07	117212
5879.63	0.0798405	1.14744e-06	69581.3		5879.63	0.0799186	7.66501e-07	104264		5879.63	0.0798405	6.79787e-07	117449
5884.62	0.0849228	1.22061e-06	69574.3		5884.62	0.0849228	8.13657e-07	104372		5884.62	0.0849228	7.20287e-07	117901
5889.61	0.089927	1.29754e-06	69305.8		5889.61	0.0898488	8.62383e-07	104187		5889.61	0.0898488	7.65968e-07	117301
5894.6	0.094853	1.36757e-06	69359		5894.6	0.0949312	9.04264e-07	104982		5894.6	0.094853	8.06436e-07	117620
5899.6	0.0998572	1.43571e-06	69552.6		5899.6	0.0998572	9.60776e-07	103934		5899.6	0.0999354	8.51237e-07	117400
5904.59	0.104861	1.51327e-06	69294.6		5904.59	0.104861	1.01449e-06	103363		5904.59	0.104861	8.95128e-07	117147
5909.58	0.109866	1.58361e-06	69376.7		5909.58	0.109866	1.06768e-06	102901		5909.58	0.109866	9.35628e-07	117424
5914.57	0.114948	1.66525e-06	69027.3		5914.57	0.11487	1.10442e-06	104009		5914.57	0.11487	9.78985e-07	117336
5919.56	0.119874	1.74376e-06	68744.7		5919.56	0.119952	1.16408e-06	103044		5919.56	0.119874	1.02717e-06	116703
5924.56	0.124878	1.80468e-06	69197		5924.56	0.124878	1.20962e-06	103238		5924.56	0.124878	1.06737e-06	116996
5929.55	0.129882	1.86811e-06	69526.2		5929.55	0.129882	1.25515e-06	103480		5929.55	0.129882	1.11321e-06	116673
5934.54	0.134887	1.93625e-06	69663.9		5934.54	0.134887	1.30037e-06	103730		5934.54	0.134887	1.15623e-06	116660
5939.53	0.139891	2.01412e-06	69454.9		5939.53	0.139969	1.36191e-06	102774		5939.53	0.139813	1.2002e-06	116491
5944.52	0.144895	2.09891e-06	69033.5		5944.52	0.144895	1.39677e-06	103736		5944.52	0.144895	1.22783e-06	118009
5949.52	0.149821	2.1614e-06	69316.7		5949.52	0.149899	1.43853e-06	104203		5949.52	0.149899	1.28341e-06	116798
5954.51	0.154903	2.24116e-06	69117.5		5954.51	0.154903	1.49349e-06	103719		5954.51	0.154825	1.32957e-06	116448
5959.5	0.159907	2.31213e-06	69160.4		5959.5	0.159907	1.53776e-06	103987		5959.5	0.159907	1.37353e-06	116421
5964.49	0.164834	2.38592e-06	69085.9		5964.49	0.164912	1.59083e-06	103664		5964.49	0.164912	1.41498e-06	116547
5969.48	0.169838	2.455e-06	69180.2		5969.48	0.169994	1.64233e-06	103508		5969.48	0.169916	1.45832e-06	116515
5974.48	0.17492	2.51247e-06	69620.8		5974.48	0.17492	1.69257e-06	103346		5974.48	0.17492	1.50385e-06	116315
5979.47	0.179846	2.5894e-06	69454.7		5979.47	0.179924	1.75286e-06	102646		5979.47	0.179924	1.52614e-06	117895
5984.46	0.184928	2.66257e-06	69454.9		5984.46	0.184928	1.78646e-06	103517		5984.46	0.18485	1.56791e-06	117896
5989.45	0.189776	2.74076e-06	69242.3		5989.45	0.189854	1.83419e-06	103508		5989.45	0.189933	1.60779e-06	118133
5994.44	0.194859	2.83402e-06	68757		5994.44	0.194859	1.8882e-06	103198		5994.44	0.19478	1.6552e-06	117678
5999.44	0.199941	2.87987e-06	69427.2		5999.44	0.199863	1.94284e-06	102871		5999.44	0.199863	1.69791e-06	117711
6000.08	0.200097	2.89714e-06	69067.3		6000.08	0.200097	1.95101e-06	102561		6000.08	0.200176	1.69885e-06	117830
6005.07	0.194937	2.82805e-06	68929.7		6005.07	0.194937	1.89857e-06	102676		6005.07	0.195015	1.65175e-06	118066
6010.06	0.189933	2.73448e-06	69458.5		6010.06	0.190011	1.83357e-06	103629		6010.06	0.189933	1.60904e-06	118041
6015.05	0.184928	2.67136e-06	69226.3		6015.05	0.185007	1.79431e-06	103107		6015.05	0.184928	1.56885e-06	117875
6020.04	0.179924	2.59945e-06	69216.3		6020.04	0.179924	1.74344e-06	103201		6020.04	0.179924	1.52614e-06	117895
6025.04	0.174998	2.5244e-06	69322.7		6025.04	0.17492	1.68504e-06	103808		6025.04	0.17492	1.48281e-06	117965
6030.03	0.169994	2.45406e-06	69270.5		6030.03	0.169994	1.6417e-06	103547		6030.03	0.169916	1.43759e-06	118195
6035.02	0.164834	2.37995e-06	69259.1		6035.02	0.164912	1.58235e-06	104219		6035.02	0.16499	1.39269e-06	118469
6040.01	0.159986	2.30647e-06	69363.8		6040.01	0.159986	1.53242e-06	104400		6040.01	0.159986	1.34967e-06	118537
6045	0.154903	2.22766e-06	69536.5		6045	0.154981	1.46899e-06	105502		6045	0.154981	1.31041e-06	118269
6050	0.150055	2.15857e-06	69516.1		6050	0.149977	1.42943e-06	104921		6050	0.149977	1.26677e-06	118394
6054.99	0.144895	2.08384e-06	69532.8		6054.99	0.144973	1.38923e-06	104355		6054.99	0.144973	1.22594e-06	118254
6059.98	0.139891	2.02166e-06	69195.9		6059.98	0.139969	1.33868e-06	104558		6059.98	0.139969	1.18449e-06	118168
6064.97	0.134965	1.94347e-06	69445.2		6064.97	0.135043	1.30351e-06	103600		6064.97	0.134965	1.13802e-06	118596
6069.96	0.129961	1.87847e-06	69184.3		6069.96	0.129961	1.2407e-06	104747		6069.96	0.129961	1.09531e-06	118651
6074.96	0.124956	1.7984e-06	69482.1		6074.96	0.124956	1.19423e-06	104633		6074.96	0.124956	1.05104e-06	118889
6079.95	0.119952	1.72021e-06	69731.3		6079.95	0.12003	1.14367e-06	104952		6079.95	0.119952	1.00802e-06	118998
6084.94	0.114948	1.6552e-06	69446.4		6084.94	0.114948	1.10034e-06	104466		6084.94	0.114948	9.68452e-07	118693
6089.93	0.109944	1.56979e-06	70037.2		6089.93	0.110022	1.04884e-06	104899		6089.93	0.109944	9.23547e-07	119045
6094.92	0.10494	1.50699e-06	69635.3		6094.92	0.10494	9.98911e-07	105054		6094.92	0.105018	8.81469e-07	119139
6099.92	0.0999354	1.43414e-06	69683.3		6099.92	0.100014	9.49611e-07	105321		6099.92	0.0999354	8.42217e-07	118658
6104.91	0.0949312	1.36066e-06	69768.6		6104.91	0.0949312	9.01566e-07	105296		6104.91	0.0949312	8.02337e-07	118318
6109.9	0.0900052	1.28467e-06	70061.2		6109.9	0.0900052	8.56348e-07	105104		6109.9	0.089927	7.55863e-07	118973
6114.89	0.0849228	1.21904e-06	69663.9		6114.89	0.0849228	8.08304e-07	105063		6114.89	0.0849228	7.13471e-07	119028
6119.88	0.0799968	1.15027e-06	69546.3		6119.88	0.0799968	7.61201e-07	105093		6119.88	0.0799186	6.70451e-07	119201
6124.88	0.0749144	1.08056e-06	69329.6		6124.88	0.0749926	7.10959e-07	105481		6124.88	0.0749144	6.30571e-07	118804
6129.87	0.0699103	1.01273e-06	69031.6		6129.87	0.0700666	6.67938e-07	104900		6129.87	0.0698321	5.90063e-07	118347
6134.86	0.0649061	9.42074e-07	68897		6134.86	0.0649061	6.1958e-07	104758		6134.86	0.0649061	5.46414e-07	118785
6139.85	0.0599019	8.67025e-07	69089		6139.85	0.0599801	5.74048e-07	104486		6139.85	0.0599801	5.05278e-07	118707
6144.84	0.0548977	7.91033e-07	69400		6144.84	0.0549759	5.25689e-07	104579		6144.84	0.0548977	4.632e-07	118518
6149.84	0.0498935	7.21635e-07	69139.5		6149.84	0.0499717	4.74505e-07	105313		6149.84	0.0499717	4.21436e-07	118575
6154.83	0.0449675	6.5318e-07	68844		6154.83	0.0448893	4.25204e-07	105571		6154.83	0.0449675	3.78416e-07	118831
6159.82	0.0399633	5.79072e-07	69012.7		6159.82	0.0399633	3.81556e-07	104738		6159.82	0.0398851	3.37908e-07	118036
6164.81	0.0349591	5.04022e-07	69360.3		6164.81	0.0349591	3.33512e-07	104821		6164.81	0.0349591	2.95516e-07	118299
6169.8	0.0299549	4.32741e-07	69221.4		6169.8	0.0299549	2.85467e-07	104933		6169.8	0.0298767	2.53123e-07	118032
6174.8	0.0249507	3.58947e-07	69511		6174.8	0.0250289	2.38051e-07	105141		6174.8	0.0250289	2.11359e-07	118419
6179.79	0.0198684	2.87665e-07	69067.6		6179.79	0.0199465	1.91576e-07	104118		6179.79	0.0198684	1.69281e-07	117369
6184.78	0.0149424	2.17012e-07	68855.1		6184.78	0.0150205	1.43846e-07	104421		6184.78	0.0149424	1.27831e-07	116891
6189.77	0.00993817	1.46672e-07	67757.7		6189.77	0.00993817	9.67436e-08	102727		6189.77	0.00993817	8.5439e-08	116319
6194.76	0.00493397	7.47625e-08	65995.4		6194.76	0.00493397	4.99962e-08	98687		6194.76	0.00485578	4.43764e-08	109423
6199.76	-7.02155e-05	4.27043e-09	-16442.3		6199.76	7.97493e-06	2.64624e-09	3013.68		6199.76	-7.02155e-05	2.51556e-09	-27912.5
6204.75	-0.00507441	-6.68827e-08	75870.2		6204.75	-0.00507441	-4.39574e-08	115439		6204.75	-0.00507441	-3.92529e-08	129275
6209.74	-0.0100004	-1.38219e-07	72351.9		6209.74	-0.0100004	-9.19768e-08	108728		6209.74	-0.0100786	-8.08906e-08	124595
6214.73	-0.0150828	-2.09643e-07	71944.9		6214.73	-0.0150828	-1.38564e-07	108850		6214.73	-0.0150828	-1.22364e-07	123261
6219.72	-0.0201652	-2.80157e-07	71978		6219.72	-0.0200088	-1.85249e-07	108010		6219.72	-0.020087	-1.63932e-07	122533
6224.72	-0.0250912	-3.50828e-07	71519.8		6224.72	-0.025013	-2.33504e-07	107120		6224.72	-0.0250912	-2.05719e-07	121968
6229.71	-0.0300954	-4.25549e-07	70721.2		6229.71	-0.029939	-2.80691e-07	106662		6229.71	-0.0300172	-2.47349e-07	121355
6234.7	-0.0350995	-4.96723e-07	70662.3		6234.7	-0.0350214	-3.28569e-07	106587		6234.7	-0.0350995	-2.87944e-07	121897
6239.69	-0.0400255	-5.69309e-07	70305.5		6239.69	-0.0400255	-3.74281e-07	106940		6239.69	-0.0400255	-3.31489e-07	120745
6244.68	-0.0450297	-6.37217e-07	70666.3		6244.68	-0.0450297	-4.24608e-07	106050		6244.68	-0.0451079	-3.72491e-07	121098
6249.68	-0.0500339	-7.07605e-07	70708.8		6249.68	-0.0500339	-4.70476e-07	106347		6249.68	-0.0500339	-4.16382e-07	120164
6254.67	-0.0550381	-7.82295e-07	70354.7		6254.67	-0.0549599	-5.18951e-07	105906		6254.67	-0.0551163	-4.58295e-07	120264
6259.66	-0.0600423	-8.48288e-07	70780.6		6259.66	-0.0600423	-5.67802e-07	105745		6259.66	-0.0600423	-4.98481e-07	120451
6264.65	-0.0650465	-9.23543e-07	70431.5		6264.65	-0.0649683	-6.15334e-07	105582		6264.65	-0.0651247	-5.41681e-07	120227
6269.64	-0.0700507	-9.92864e-07	70554.2		6269.64	-0.0700507	-6.63746e-07	105538		6269.64	-0.0700507	-5.85101e-07	119724
6274.64	-0.0750549	-1.06951e-06	70176.8		6274.64	-0.0750549	-7.131e-07	105252		6274.64	-0.0750549	-6.28301e-07	119457
6279.63	-0.0799809	-1.14299e-06	69975.1		6279.63	-0.0799027	-7.57838e-07	105435		6279.63	-0.0799809	-6.68738e-07	119600
6284.62	-0.0850633	-1.20925e-06	70343.9		6284.62	-0.0850633	-8.01791e-07	106092		6284.62	-0.0850633	-7.09897e-07	119825
6289.61	-0.0900675	-1.28367e-06	70164		6289.61	-0.0899893	-8.52683e-07	105537		6289.61	-0.0899893	-7.49079e-07	120133
6294.6	-0.0950716	-1.36531e-06	69633.5		6294.6	-0.0949934	-9.06118e-07	104836		6294.6	-0.0950716	-7.93754e-07	119775
6299.6	-0.100154	-1.43503e-06	69792.5		6299.6	-0.100154	-9.53337e-07	105056		6299.6	-0.100076	-8.35102e-07	119837
6304.59	-0.10508	-1.50694e-06	69730.9		6304.59	-0.104924	-1.00121e-06	104796		6304.59	-0.105002	-8.78522e-07	119521
6309.58	-0.110084	-1.58356e-06	69517.1		6309.58	-0.110006	-1.05852e-06	103924		6309.58	-0.110006	-9.23229e-07	119154
6314.57	-0.115088	-1.65798e-06	69414.9		6314.57	-0.115088	-1.10719e-06	103946		6314.57	-0.11501	-9.67716e-07	118847
6319.56	-0.120171	-1.72455e-06	69682.5		6319.56	-0.120014	-1.15587e-06	103831		6319.56	-0.120014	-1.015e-06	118241
6324.56	-0.125097	-1.80305e-06	69380.6		6324.56	-0.125019	-1.20422e-06	103817		6324.56	-0.125097	-1.06292e-06	117692
6329.55	-0.130101	-1.87339e-06	69446.7		6329.55	-0.129945	-1.25415e-06	103611		6329.55	-0.130101	-1.10814e-06	117405
6334.54	-0.135105	-1.96414e-06	68785.8		6334.54	-0.135105	-1.30785e-06	103303		6334.54	-0.135027	-1.1499e-06	117425
6339.53	-0.140109	-2.02286e-06	69262.9		6339.53	-0.140031	-1.35495e-06	103348		6339.53	-0.140109	-1.19135e-06	117606
6344.52	-0.145035	-2.09634e-06	69184.9		6344.52	-0.144957	-1.40676e-06	103043		6344.52	-0.145114	-1.23877e-06	117144
6349.52	-0.15004	-2.1849e-06	68671.3		6349.52	-0.15004	-1.45481e-06	103133		6349.52	-0.150118	-1.28084e-06	117202
6354.51	-0.1552	-2.26246e-06	68598		6354.51	-0.155122	-1.50223e-06	103261		6354.51	-0.155122	-1.31601e-06	117873
6359.5	-0.160048	-2.31396e-06	69166.4		6359.5	-0.15997	-1.55561e-06	102834		6359.5	-0.160126	-1.36249e-06	117525
6364.49	-0.165052	-2.39058e-06	69042.8		6364.49	-0.164974	-1.60868e-06	102553		6364.49	-0.16513	-1.4165e-06	116576
6369.48	-0.170134	-2.47222e-06	68818.5		6369.48	-0.169978	-1.66646e-06	102000		6369.48	-0.170134	-1.46015e-06	116519
6374.48	-0.17506	-2.53816e-06	68971.3		6374.48	-0.17506	-1.71199e-06	102256		6374.48	-0.17506	-1.50254e-06	116510
6379.47	-0.179986	-2.61949e-06	68710.4		6379.47	-0.180065	-1.7594e-06	102344		6379.47	-0.180143	-1.56597e-06	115036
6384.46	-0.185069	-2.66597e-06	69419		6384.46	-0.184991	-1.81342e-06	102012		6384.46	-0.185147	-1.60397e-06	115431
6389.45	-0.190151	-2.74604e-06	69245.6		6389.45	-0.189995	-1.869e-06	101656		6389.45	-0.190073	-1.6473e-06	115385
6394.44	-0.195077	-2.82894e-06	68957.7		6394.44	-0.194999	-1.9139e-06	101886		6394.44	-0.195077	-1.69849e-06	114854
6399.44	-0.200081	-2.91059e-06	68742.7		6399.44	-0.200003	-1.97451e-06	101293		6399.44	-0.200003	-1.74747e-06	114453
6400.08	-0.200316	-2.91655e-06	68682.5		6400.08	-0.200238	-1.96257e-06	102028		6400.08	-0.200316	-1.74213e-06	114983
6405.07	-0.195155	-2.81293e-06	69378.1		6405.07	-0.195077	-1.91924e-06	101643		6405.07	-0.195155	-1.6944e-06	115177
6410.06	-0.190151	-2.74447e-06	69285.2		6410.06	-0.190073	-1.86711e-06	101801		6410.06	-0.190073	-1.66551e-06	114123
6415.05	-0.185147	-2.67225e-06	69285.1		6415.05	-0.185069	-1.81938e-06	101721		6415.05	-0.185225	-1.62626e-06	113896
6420.05	-0.180143	-2.60317e-06	69201.5		6420.05	-0.180143	-1.76286e-06	102188		6420.05	-0.180065	-1.57853e-06	114071
6425.04	-0.17506	-2.52403e-06	69357.4		6425.04	-0.17506	-1.71481e-06	102087		6425.04	-0.175139	-1.5374e-06	113919
6430.03	-0.170213	-2.45526e-06	69325.6		6430.03	-0.170134	-1.66426e-06	102228		6430.03	-0.170134	-1.49595e-06	113730
6435.02	-0.16513	-2.36985e-06	69679.6		6435.02	-0.16513	-1.61119e-06	102490		6435.02	-0.16513	-1.44664e-06	114147
6440.01	-0.160204	-2.31113e-06	69318.6		6440.01	-0.160126	-1.56283e-06	102459		6440.01	-0.160126	-1.40582e-06	113902
6445.01	-0.1552	-2.24927e-06	69000.2		6445.01	-0.155044	-1.51604e-06	102269		6445.01	-0.1552	-1.35778e-06	114304
6450	-0.150196	-2.16009e-06	69532.3		6450	-0.150118	-1.46486e-06	102479		6450	-0.150118	-1.30942e-06	114644
6454.99	-0.14527	-2.09226e-06	69432		6454.99	-0.145114	-1.41524e-06	102536		6454.99	-0.145114	-1.27048e-06	114219
6459.98	-0.140109	-2.03071e-06	68995.1		6459.98	-0.140031	-1.36249e-06	102776		6459.98	-0.140109	-1.22809e-06	114087
6464.97	-0.135183	-1.94091e-06	69649.6		6464.97	-0.135105	-1.31915e-06	102418		6464.97	-0.135105	-1.18005e-06	114492
6469.97	-0.130179	-1.8781e-06	69314.2		6469.97	-0.130101	-1.2686e-06	102555		6469.97	-0.130179	-1.14079e-06	114113
6474.96	-0.125253	-1.80148e-06	69527.8		6474.96	-0.125097	-1.21867e-06	102650		6474.96	-0.125175	-1.0984e-06	113961
6479.95	-0.120171	-1.72266e-06	69758.7		6479.95	-0.120014	-1.16309e-06	103186		6479.95	-0.120171	-1.05067e-06	114375
6484.94	-0.115167	-1.65327e-06	69660		6484.94	-0.115088	-1.11724e-06	103011		6484.94	-0.115167	-1.00545e-06	114542
6489.93	-0.110162	-1.5779e-06	69815.7		6489.93	-0.110084	-1.07171e-06	102718		6489.93	-0.110162	-9.62118e-07	114500
6494.93	-0.105236	-1.50411e-06	69965.9		6494.93	-0.10508	-1.02618e-06	102399		6494.93	-0.10508	-9.17842e-07	114486
6499.92	-0.100154	-1.43503e-06	69792.5		6499.92	-0.100154	-9.63688e-07	103928		6499.92	-0.100154	-8.76392e-07	114280
6504.91	-0.0951498	-1.35778e-06	70077.6		6504.91	-0.0951498	-9.1847e-07	103596		6504.91	-0.0951498	-8.30545e-07	114563
6509.9	-0.0902238	-1.28932e-06	69977.7		6509.9	-0.0901456	-8.71367e-07	103453		6509.9	-0.0901456	-7.85327e-07	114787
6514.89	-0.0851415	-1.21773e-06	69918.3		6514.89	-0.0851415	-8.19555e-07	103887		6514.89	-0.0851415	-7.41051e-07	114893
6519.89	-0.0801373	-1.14456e-06	70015.7		6519.89	-0.0800591	-7.72766e-07	103601		6519.89	-0.0802155	-6.97089e-07	115072
6524.88	-0.0752113	-1.07328e-06	70076.1		6524.88	-0.0750549	-7.24094e-07	103654		6524.88	-0.0751331	-6.5344e-07	114981
6529.87	-0.0701289	-1.00074e-06	70076.9		6529.87	-0.0701289	-6.72281e-07	104315		6529.87	-0.0701289	-6.1042e-07	114886
6534.86	-0.0651247	-9.27576e-07	70209.5		6534.86	-0.0651247	-6.25179e-07	104170		6534.86	-0.0651247	-5.68342e-07	114587
6539.85	-0.0601205	-8.56923e-07	70158.6		6539.85	-0.0601205	-5.75564e-07	104455		6539.85	-0.0601205	-5.23752e-07	114788
6544.85	-0.0551945	-7.87839e-07	70058.1		6544.85	-0.0551163	-5.30032e-07	103987		6544.85	-0.0551163	-4.80418e-07	114726
6549.84	-0.0501121	-7.15616e-07	70026.6		6549.84	-0.0501121	-4.8136e-07	104105		6549.84	-0.0501121	-4.3834e-07	114323
6554.83	-0.0451861	-6.42136e-07	70368.5		6554.83	-0.0451861	-4.31431e-07	104735		6554.83	-0.0451861	-3.91551e-07	115403
6559.82	-0.0401819	-5.70226e-07	70466.6		6559.82	-0.0401037	-3.84015e-07	104433		6559.82	-0.0401819	-3.48217e-07	115393
6564.81	-0.0351777	-4.98631e-07	70548.7		6564.81	-0.0350995	-3.35656e-07	104570		6564.81	-0.0352559	-3.04255e-07	115876
6569.81	-0.0300954	-4.27663e-07	70371.7		6569.81	-0.0300172	-2.86984e-07	104595		6569.81	-0.0301735	-2.60607e-07	115782
6574.8	-0.0251694	-3.55753e-07	70749.5		6574.8	-0.0250912	-2.38625e-07	105149		6574.8	-0.0251694	-2.16958e-07	116010
6579.79	-0.020087	-2.84158e-07	70689.5		6579.79	-0.0200088	-1.90581e-07	104988		6579.79	-0.0201652	-1.72682e-07	116776
6584.78	-0.0150828	-2.12562e-07	70957.1		6584.78	-0.0150828	-1.42223e-07	106051		6584.78	-0.0150828	-1.29662e-07	116324
6589.77	-0.0101568	-1.40966e-07	72051.1		6589.77	-0.0100786	-9.44921e-08	106661		6589.77	-0.0100786	-8.46899e-08	119006
6594.77	-0.0051526	-6.82701e-08	75473.6		6594.77	-0.0051526	-4.51946e-08	114009		6594.77	-0.0051526	-4.13957e-08	124472
6599.76	-0.000226596	3.24675e-09	-69791.7		6599.76	-0.000148406	2.34754e-09	-63217.7		6599.76	-0.000148406	2.05195e-09	-72324.5
6604.75	0.00485578	7.49942e-08	64748.8		6604.75	0.00485578	4.97415e-08	97620.4		6604.75	0.00493397	4.56312e-08	108127
6609.74	0.00993817	1.45689e-07	68214.8		6609.74	0.00985997	9.83583e-08	100245		6609.74	0.00985997	8.90487e-08	110726
6614.73	0.0148642	2.16863e-07	68541.9		6614.73	0.0149424	1.45093e-07	102985		6614.73	0.0148642	1.31938e-07	112660
6619.73	0.0198684	2.88099e-07	68963.7		6619.73	0.0199465	1.91997e-07	103890		6619.73	0.0198684	1.76017e-07	112877
6624.72	0.0248725	3.58989e-07	69284.9		6624.72	0.0248725	2.3931e-07	103934		6624.72	0.0248725	2.20724e-07	112686
6629.71	0.0298767	4.28185e-07	69775.3		6629.71	0.0299549	2.87816e-07	104077		6629.71	0.0298767	2.62449e-07	113838
6634.7	0.0348809	5.01148e-07	69602.1		6634.7	0.0349591	3.36102e-07	104013		6634.7	0.0348809	3.06528e-07	113794
6639.69	0.0398851	5.72917e-07	69617.6		6639.69	0.0398851	3.82034e-07	104402		6639.69	0.0398851	3.49602e-07	114087
6644.69	0.0448893	6.44059e-07	69697.5		6644.69	0.0448893	4.30037e-07	104385		6644.69	0.0448893	3.92959e-07	114234
6649.68	0.0498153	7.14573e-07	69713.4		6649.68	0.0498935	4.76753e-07	104653		6649.68	0.0498153	4.36818e-07	114041
6654.67	0.0548977	7.86343e-07	69813.9		6654.67	0.0549759	5.2325e-07	105066		6654.67	0.0548977	4.80301e-07	114298
6659.66	0.0598237	8.56826e-07	69820.1		6659.66	0.0599019	5.7006e-07	105080		6659.66	0.0599019	5.23658e-07	114391
6664.65	0.0649061	9.24483e-07	70208		6664.65	0.0649061	6.2045e-07	104611		6664.65	0.0648279	5.66733e-07	114389
6669.65	0.0698321	9.92611e-07	70351.9		6669.65	0.0699103	6.70243e-07	104306		6669.65	0.0698321	6.08991e-07	114669
6674.64	0.0748363	1.0771e-06	69479.3		6674.64	0.0748363	7.13035e-07	104955		6674.64	0.0748363	6.53509e-07	114514
6679.63	0.0798405	1.14336e-06	69829.8		6679.63	0.0799186	7.57522e-07	105500		6679.63	0.0798405	6.98279e-07	114339
6684.62	0.0848446	1.21244e-06	69978.3		6684.62	0.0849228	8.08351e-07	105057		6684.62	0.0849228	7.40914e-07	114619
6689.61	0.0898488	1.28749e-06	69785.9		6689.61	0.089927	8.54471e-07	105243		6689.61	0.089927	7.8694e-07	114274
6694.61	0.0949312	1.3572e-06	69946.2		6694.61	0.0950094	9.09695e-07	104441		6694.61	0.094853	8.29292e-07	114378
6699.6	0.0998572	1.4332e-06	69674.5		6699.6	0.0998572	9.5255e-07	104831		6699.6	0.0998572	8.70828e-07	114669
6704.59	0.104861	1.50762e-06	69554.4		6704.59	0.104861	1.00467e-06	104374		6704.59	0.104861	9.161e-07	114465
6709.58	0.109787	1.57419e-06	69742.2		6709.58	0.109866	1.05229e-06	104406		6709.58	0.109866	9.56443e-07	114869
6714.57	0.11487	1.64955e-06	69637		6714.57	0.11487	1.10097e-06	104335		6714.57	0.114948	9.9845e-07	115126
6719.57	0.119874	1.70796e-06	70185.5		6719.57	0.119952	1.1487e-06	104425		6719.57	0.119952	1.0457e-06	114710
6724.56	0.124878	1.7918e-06	69694.2		6724.56	0.124956	1.19454e-06	104606		6724.56	0.124956	1.09186e-06	114444
6729.55	0.129882	1.87062e-06	69432.8		6729.55	0.129882	1.25264e-06	103687		6729.55	0.129804	1.13614e-06	114251
6734.54	0.134887	1.93782e-06	69607.4		6734.54	0.134887	1.29283e-06	104334		6734.54	0.134887	1.17978e-06	114332
6739.53	0.139891	2.0135e-06	69476.5		6739.53	0.139891	1.34244e-06	104206		6739.53	0.139891	1.22343e-06	114343
6744.53	0.144895	2.08007e-06	69658.7		6744.53	0.144895	1.39865e-06	103596		6744.53	0.144895	1.27022e-06	114071
6749.52	0.149899	2.14727e-06	69809.2		6749.52	0.149899	1.44199e-06	103953		6749.52	0.149821	1.31293e-06	114112
6754.51	0.154825	2.21729e-06	69826.2		6754.51	0.154981	1.48344e-06	104475		6754.51	0.154825	1.35972e-06	113866
6759.5	0.159829	2.26942e-06	70427.4		6759.5	0.159907	1.53525e-06	104157		6759.5	0.159907	1.40776e-06	113590
6764.49	0.164912	2.35106e-06	70143.4		6764.49	0.16499	1.57639e-06	104663		6764.49	0.164834	1.44952e-06	113716
6769.49	0.169838	2.42706e-06	69976.8		6769.49	0.169916	1.62474e-06	104580		6769.49	0.169838	1.49286e-06	113767
6774.48	0.174842	2.5043e-06	69816.6		6774.48	0.17492	1.68095e-06	104060		6774.48	0.174842	1.53776e-06	113699
6779.47	0.179846	2.57747e-06	69776.2		6779.47	0.179924	1.73528e-06	103686		6779.47	0.179846	1.58549e-06	113432
6784.46	0.184772	2.64624e-06	69824.4		6784.46	0.184928	1.78678e-06	103498		6784.46	0.18485	1.62349e-06	113860
6789.45	0.189854	2.71469e-06	69935.9		6789.45	0.189933	1.83357e-06	103587		6789.45	0.189854	1.66525e-06	114009
6794.45	0.194937	2.78817e-06	69915.6		6794.45	0.194859	1.89605e-06	102771		6794.45	0.194859	1.7067e-06	114173
6799.44	0.199863	2.86417e-06	69780.5		6799.44	0.199863	1.92683e-06	103726		6799.44	0.199785	1.75726e-06	113691
6800.08	0.200097	2.87202e-06	69671.4		6800.08	0.200176	1.9375e-06	103316		6800.08	0.200097	1.76291e-06	113504
6805.07	0.194859	2.79194e-06	69793.2		6805.07	0.195015	1.8747e-06	104025		6805.07	0.194937	1.71518e-06	113654
6810.06	0.189933	2.70873e-06	70118.8		6810.06	0.190011	1.8232e-06	104218		6810.06	0.189933	1.66525e-06	114056
6815.05	0.184928	2.64687e-06	69866.9		6815.05	0.184928	1.76762e-06	104620		6815.05	0.184928	1.61784e-06	114306
6820.04	0.179924	2.56522e-06	70139.8		6820.04	0.179924	1.73496e-06	103705		6820.04	0.180002	1.58015e-06	113914
6825.04	0.17492	2.50116e-06	69935.5		6825.04	0.17492	1.68849e-06	103596		6825.04	0.17492	1.53211e-06	114169
6830.03	0.169838	2.41921e-06	70203.9		6830.03	0.169994	1.63762e-06	103806		6830.03	0.169916	1.48815e-06	114179
6835.02	0.164912	2.34039e-06	70463.4		6835.02	0.16499	1.57921e-06	104476		6835.02	0.164912	1.44262e-06	114314
6840.01	0.159907	2.27413e-06	70315.9		6840.01	0.160064	1.53431e-06	104323		6840.01	0.159907	1.40274e-06	113997
6845	0.154903	2.20976e-06	70099.7		6845	0.15506	1.48721e-06	104262		6845	0.154903	1.35406e-06	114399
6850	0.149821	2.13188e-06	70276.4		6850	0.150055	1.42849e-06	105045		6850	0.149977	1.30884e-06	114588
6854.99	0.144895	2.0584e-06	70392		6854.99	0.145051	1.38264e-06	104909		6854.99	0.144895	1.2608e-06	114923
6859.98	0.139969	1.98681e-06	70449.2		6859.98	0.140047	1.33334e-06	105035		6859.98	0.139969	1.21841e-06	114879
6864.97	0.134887	1.91019e-06	70614.4		6864.97	0.134965	1.28561e-06	104981		6864.97	0.134965	1.17445e-06	114918
6869.96	0.129961	1.8455e-06	70420.3		6869.96	0.129961	1.23662e-06	105093		6869.96	0.129882	1.1308e-06	114859
6874.96	0.124956	1.76542e-06	70779.8		6874.96	0.124878	1.18481e-06	105399		6874.96	0.124956	1.0928e-06	114345
6879.95	0.119952	1.69885e-06	70607.8		6879.95	0.119952	1.1399e-06	105230		6879.95	0.119952	1.04256e-06	115055
6884.94	0.114948	1.63197e-06	70435.2		6884.94	0.115026	1.08998e-06	105531		6884.94	0.114948	1.00048e-06	114893
6889.93	0.109944	1.55284e-06	70802		6889.93	0.110022	1.04162e-06	105626		6889.93	0.109866	9.59031e-07	114559
6894.92	0.105018	1.48438e-06	70748.6		6894.92	0.105018	9.94829e-07	105564		6894.92	0.10494	9.12557e-07	114995
6899.92	0.100014	1.4131e-06	70776.1		6899.92	0.100014	9.44586e-07	105881		6899.92	0.0999354	8.69537e-07	114929
6904.91	0.0950094	1.34715e-06	70526		6904.91	0.0949312	9.0031e-07	105443		6904.91	0.0949312	8.28087e-07	114639
6909.9	0.0900052	1.26991e-06	70875.4		6909.9	0.089927	8.50068e-07	105788		6909.9	0.089927	7.82868e-07	114869
6914.89	0.085001	1.19988e-06	70841.2		6914.89	0.085001	8.04535e-07	105652		6914.89	0.0848446	7.39848e-07	114678
6919.88	0.0799968	1.13143e-06	70704.4		6919.88	0.0799186	7.52409e-07	106217		6919.88	0.0799186	6.97142e-07	114638
6924.88	0.0749926	1.06391e-06	70487.6		6924.88	0.0749144	7.07819e-07	105838		6924.88	0.0749926	6.52866e-07	114867
6929.87	0.0699885	9.92945e-07	70485.7		6929.87	0.0699885	6.626e-07	105627		6929.87	0.0699103	6.08275e-07	114932
6934.86	0.0649843	9.21977e-07	70483.6		6934.86	0.0649843	6.1644e-07	105419		6934.86	0.0649843	5.66511e-07	114710
6939.85	0.0599801	8.52266e-07	70377.2		6939.85	0.0600583	5.66511e-07	106014		6939.85	0.0599801	5.20351e-07	115268
6944.84	0.0550541	7.76588e-07	70892.3		6944.84	0.0549759	5.17211e-07	106293		6944.84	0.0548977	4.79843e-07	114408
6949.84	0.0499717	7.08761e-07	70505.7		6949.84	0.0499717	4.72935e-07	105663		6949.84	0.0498935	4.33683e-07	115046
6954.83	0.0450457	6.41561e-07	70212.6		6954.83	0.0450457	4.25518e-07	105861		6954.83	0.0449675	3.9129e-07	114921
6959.82	0.0400415	5.68709e-07	70407.7		6959.82	0.0400415	3.78416e-07	105813		6959.82	0.0399633	3.49526e-07	114336
6964.81	0.0350373	4.98056e-07	70348.1		6964.81	0.0350373	3.31941e-07	105553		6964.81	0.0348027	3.0368e-07	114603
6969.8	0.0299549	4.26774e-07	70189.2		6969.8	0.0298767	2.83897e-07	105238		6969.8	0.0298767	2.61602e-07	114207
6974.8	0.0249507	3.59261e-07	69450.2		6974.8	0.0249507	2.37109e-07	105229		6974.8	0.0249507	2.18582e-07	114148
6979.79	0.0200247	2.87665e-07	69611.3		6979.79	0.0199465	1.90006e-07	104978		6979.79	0.0198684	1.75248e-07	113373
6984.78	0.0149424	2.15756e-07	69255.9		6984.78	0.0150205	1.42904e-07	105109		6984.78	0.0149424	1.31599e-07	113544
6989.77	0.0100164	1.46358e-07	68437.3		6989.77	0.00993817	9.67436e-08	102727		6989.77	0.00993817	8.85791e-08	112195
6994.76	0.00501217	7.50765e-08	66760.8		6994.76	0.00493397	4.94311e-08	99815.2		6994.76	0.00493397	4.57892e-08	107754
6999.76	-7.02155e-05	3.37432e-09	-20808.8		6999.76	-7.02155e-05	3.1783e-09	-22092.2		6999.76	-7.02155e-05	2.55912e-09	-27437.4
7004.75	-0.00499622	-6.53426e-08	76461.9		7004.75	-0.00499622	-4.43868e-08	112561		7004.75	-0.0051526	-4.07681e-08	126388
7009.74	-0.00992222	-1.35393e-07	73284.3		7009.74	-0.0100786	-9.00663e-08	111902		7009.74	-0.0100786	-8.41888e-08	119714
7014.73	-0.0150828	-2.06598e-07	73005.4		7014.73	-0.0150046	-1.37466e-07	109152		7014.73	-0.0150828	-1.27136e-07	118635
7019.72	-0.0199306	-2.76987e-07	71955.1		7019.72	-0.0200088	-1.84339e-07	108544		7019.72	-0.0200088	-1.7109e-07	116949
7024.72	-0.025013	-3.47563e-07	71966.7		7024.72	-0.0250912	-2.30333e-07	108934		7024.72	-0.0250912	-2.14133e-07	117176
7029.71	-0.029939	-4.18768e-07	71493		7029.71	-0.0300172	-2.77457e-07	108187		7029.71	-0.0300172	-2.58181e-07	116264
7034.7	-0.0350214	-4.89502e-07	71544.9		7034.7	-0.0350214	-3.2477e-07	107834		7034.7	-0.0350995	-3.016e-07	116378
7039.69	-0.0400255	-5.58163e-07	71709.4		7039.69	-0.0399474	-3.72083e-07	107361		7039.69	-0.0401037	-3.45052e-07	116225
7044.68	-0.0450297	-6.27422e-07	71769.5		7044.68	-0.0451079	-4.17795e-07	107967		7044.68	-0.0451079	-3.89319e-07	115864
7049.68	-0.0499557	-7.01295e-07	71233.6		7049.68	-0.0500339	-4.66615e-07	107228		7049.68	-0.0501121	-4.31515e-07	116131
7054.67	-0.0550381	-7.698e-07	71496.7		7054.67	-0.0551163	-5.11824e-07	107686		7054.67	-0.0550381	-4.74369e-07	116024
7059.66	-0.0600423	-8.43453e-07	71186.3		7059.66	-0.0599641	-5.60424e-07	106998		7059.66	-0.0601205	-5.1804e-07	116054
7064.65	-0.0650465	-9.17609e-07	70886.9		7064.65	-0.0650465	-6.07643e-07	107047		7064.65	-0.0651247	-5.63595e-07	115552
7069.64	-0.0699725	-9.84795e-07	71052.9		7069.64	-0.0700507	-6.56431e-07	106714		7069.64	-0.0700507	-6.06606e-07	115480
7074.64	-0.0749767	-1.06103e-06	70663.9		7074.64	-0.0751331	-7.00981e-07	107183		7074.64	-0.0750549	-6.50591e-07	115364
7079.63	-0.0800591	-1.13828e-06	70333.3		7079.63	-0.0799809	-7.4955e-07	106705		7079.63	-0.0800591	-6.92944e-07	115535
7084.62	-0.0849851	-1.21553e-06	69916.1		7084.62	-0.0849851	-7.93566e-07	107093		7084.62	-0.0850633	-7.40445e-07	114881
7089.61	-0.0900675	-1.28084e-06	70318.8		7089.61	-0.0899893	-8.44458e-07	106565		7089.61	-0.0901456	-7.82829e-07	115154
7094.6	-0.0951498	-1.35275e-06	70337.9		7094.6	-0.0950716	-8.97108e-07	105976		7094.6	-0.0950716	-8.27567e-07	114881
7099.6	-0.0999976	-1.42686e-06	70082.2		7099.6	-0.0999976	-9.45959e-07	105710		7099.6	-0.0999976	-8.73467e-07	114484
7104.59	-0.105002	-1.49814e-06	70088		7104.59	-0.10508	-9.91796e-07	105949		7104.59	-0.10508	-9.14218e-07	114940
7109.58	-0.110006	-1.57539e-06	69827.8		7109.58	-0.110084	-1.04156e-06	105691		7109.58	-0.110084	-9.61814e-07	114455
7114.57	-0.11501	-1.64573e-06	69884		7114.57	-0.11501	-1.09526e-06	105007		7114.57	-0.115088	-1.00476e-06	114543
7119.56	-0.120014	-1.71858e-06	69833.4		7119.56	-0.120014	-1.1499e-06	104369		7119.56	-0.120014	-1.05601e-06	113649
7124.56	-0.125019	-1.78829e-06	69909.4		7124.56	-0.125019	-1.18978e-06	105077		7124.56	-0.125097	-1.10029e-06	113695
7129.55	-0.130023	-1.85989e-06	69908.9		7129.55	-0.130023	-1.24787e-06	104196		7129.55	-0.130023	-1.14582e-06	113476
7134.54	-0.135027	-1.93745e-06	69693.1		7134.54	-0.135105	-1.29278e-06	104508		7134.54	-0.135027	-1.19104e-06	113369
7139.53	-0.140031	-2.01501e-06	69493.9		7139.53	-0.140031	-1.34553e-06	104071		7139.53	-0.140031	-1.23594e-06	113299
7144.52	-0.145114	-2.0954e-06	69253.3		7144.52	-0.145035	-1.39766e-06	103770		7144.52	-0.145035	-1.27802e-06	113485
7149.52	-0.15004	-2.16731e-06	69228.4		7149.52	-0.15004	-1.44256e-06	104009		7149.52	-0.15004	-1.32198e-06	113496
7154.51	-0.155044	-2.2411e-06	69181.8		7154.51	-0.154966	-1.49343e-06	103765		7154.51	-0.155044	-1.36751e-06	113376
7159.5	-0.15997	-2.30987e-06	69254.7		7159.5	-0.160048	-1.54901e-06	103322		7159.5	-0.160048	-1.41116e-06	113416
7164.49	-0.165052	-2.39026e-06	69051.9		7164.49	-0.165052	-1.59988e-06	103165		7164.49	-0.164974	-1.4636e-06	112718
7169.48	-0.170056	-2.47159e-06	68804.3		7169.48	-0.170056	-1.6517e-06	102959		7169.48	-0.169978	-1.50474e-06	112962
7174.48	-0.17506	-2.53534e-06	69048.2		7174.48	-0.174982	-1.70131e-06	102851		7174.48	-0.174982	-1.54744e-06	113078
7179.47	-0.180065	-2.61353e-06	68897.2		7179.47	-0.179986	-1.75155e-06	102758		7179.47	-0.180065	-1.58827e-06	113372
7184.46	-0.185069	-2.6757e-06	69166.5		7184.46	-0.184991	-1.80274e-06	102616		7184.46	-0.184991	-1.636e-06	113075
7189.45	-0.190073	-2.74604e-06	69217.1		7189.45	-0.190073	-1.84858e-06	102821		7189.45	-0.189995	-1.69095e-06	112360
7194.44	-0.194999	-2.83554e-06	68769.7		7194.44	-0.194999	-1.89946e-06	102661		7194.44	-0.194999	-1.72894e-06	112785
7199.44	-0.200003	-2.8996e-06	68976.2		7199.44	-0.200003	-1.95221e-06	102450		7199.44	-0.200003	-1.76977e-06	113011
7200.08	-0.200316	-2.90996e-06	68838.1		7200.08	-0.200316	-1.95755e-06	102330		7200.08	-0.200238	-1.77197e-06	113003
7205.07	-0.195155	-2.82769e-06	69015.9		7205.07	-0.195155	-1.89223e-06	103135		7205.07	-0.194999	-1.7324e-06	112560
7210.06	-0.190073	-2.7473e-06	69185.4		7210.06	-0.190151	-1.85267e-06	102636		7210.06	-0.189917	-1.68404e-06	112774
7215.05	-0.185147	-2.6845e-06	68969		7215.05	-0.185147	-1.80305e-06	102685		7215.05	-0.184991	-1.63882e-06	112880
7220.04	-0.180143	-2.6151e-06	68885.7		7220.04	-0.180143	-1.74716e-06	103106		7220.04	-0.180065	-1.598e-06	112681
7225.04	-0.175139	-2.53597e-06	69061.9		7225.04	-0.175139	-1.69535e-06	103306		7225.04	-0.174982	-1.54933e-06	112941
7230.03	-0.170134	-2.47096e-06	68853.5		7230.03	-0.170134	-1.65044e-06	103084		7230.03	-0.170056	-1.50599e-06	112920
7235.02	-0.16513	-2.38712e-06	69175.5		7235.02	-0.165052	-1.60522e-06	102822		7235.02	-0.164974	-1.46266e-06	112790
7240.01	-0.160126	-2.31113e-06	69284.8		7240.01	-0.160048	-1.55278e-06	103072		7240.01	-0.160126	-1.41147e-06	113446
7245	-0.155122	-2.24393e-06	69129.5		7245	-0.155122	-1.50411e-06	103132		7245	-0.155122	-1.3672e-06	113460
7250	-0.15004	-2.17359e-06	69028.4		7250	-0.150118	-1.4523e-06	103366		7250	-0.15004	-1.32292e-06	113415
7254.99	-0.145114	-2.09854e-06	69149.7		7254.99	-0.145114	-1.39452e-06	104060		7254.99	-0.145035	-1.28304e-06	113040
7259.98	-0.140109	-2.03354e-06	68899.2		7259.98	-0.140031	-1.3515e-06	103612		7259.98	-0.140109	-1.23939e-06	113047
7264.97	-0.135105	-1.96006e-06	68929.1		7264.97	-0.135105	-1.29749e-06	104128		7264.97	-0.135027	-1.19009e-06	113459
7269.96	-0.130101	-1.87716e-06	69307.3		7269.96	-0.130101	-1.24473e-06	104521		7269.96	-0.130101	-1.15335e-06	112802
7274.96	-0.125097	-1.80902e-06	69151.7		7274.96	-0.125097	-1.20046e-06	104208		7274.96	-0.125019	-1.11065e-06	112564
7279.95	-0.120093	-1.73899e-06	69058.7		7279.95	-0.120014	-1.15273e-06	104114		7279.95	-0.119936	-1.06386e-06	112737
7284.94	-0.115088	-1.66394e-06	69166.1		7284.94	-0.115088	-1.09809e-06	104808		7284.94	-0.11501	-1.0155e-06	113255
7289.93	-0.110162	-1.59235e-06	69182.4		7289.93	-0.110084	-1.05601e-06	104246		7289.93	-0.110084	-9.69654e-07	113529
7294.92	-0.105158	-1.52107e-06	69134.5		7294.92	-0.10508	-1.00325e-06	104739		7294.92	-0.10508	-9.2946e-07	113055
7299.92	-0.100076	-1.4435e-06	69328.4		7299.92	-0.100154	-9.55524e-07	104816		7299.92	-0.100076	-8.78276e-07	113946
7304.91	-0.0950716	-1.36971e-06	69410		7304.91	-0.0950716	-9.05595e-07	104982		7304.91	-0.0950716	-8.34314e-07	113952
7309.9	-0.0901456	-1.29403e-06	69662.6		7309.9	-0.0902238	-8.56295e-07	105365		7309.9	-0.0900675	-7.92235e-07	113688
7314.89	-0.0850633	-1.22338e-06	69531.4		7314.89	-0.0850633	-8.14845e-07	104392		7314.89	-0.0851415	-7.46703e-07	114023
7319.88	-0.0800591	-1.15273e-06	69452		7319.88	-0.0800591	-7.63032e-07	104922		7319.88	-0.0801373	-7.02427e-07	114086
7324.88	-0.0751331	-1.0783e-06	69677.1		7324.88	-0.0751331	-7.1593e-07	104945		7324.88	-0.0750549	-6.57837e-07	114094
7329.87	-0.0701289	-1.0042e-06	69835.8		7329.87	-0.0700507	-6.65687e-07	105231		7329.87	-0.0700507	-6.16072e-07	113705
7334.86	-0.0651247	-9.30088e-07	70019.9		7334.86	-0.0649683	-6.18271e-07	105081		7334.86	-0.0650465	-5.73052e-07	113509
7339.85	-0.0601205	-8.62261e-07	69724.2		7339.85	-0.0601205	-5.70854e-07	105317		7339.85	-0.0600423	-5.26892e-07	113956
7344.84	-0.0551163	-7.87839e-07	69958.8		7344.84	-0.0551163	-5.22496e-07	105487		7344.84	-0.0550381	-4.83558e-07	113819
7349.84	-0.0501121	-7.16558e-07	69934.5		7349.84	-0.0501121	-4.71939e-07	106183		7349.84	-0.0500339	-4.3991e-07	113737
7354.83	-0.0451079	-6.44334e-07	70007.1		7354.83	-0.0451079	-4.22953e-07	106650		7354.83	-0.0451079	-3.96261e-07	113834
7359.82	-0.0401819	-5.72424e-07	70196.1		7359.82	-0.0401037	-3.7585e-07	106701		7359.82	-0.0401037	-3.51357e-07	114140
7364.81	-0.0350995	-4.99573e-07	70259.1		7364.81	-0.0350995	-3.2969e-07	106462		7364.81	-0.0350995	-3.06139e-07	114652
7369.8	-0.0301735	-4.29233e-07	70296.4		7369.8	-0.0300954	-2.82902e-07	106381		7369.8	-0.0300172	-2.61863e-07	114629
7374.8	-0.0250912	-3.55753e-07	70529.7		7374.8	-0.0250912	-2.35799e-07	106409		7374.8	-0.0250912	-2.18528e-07	114819
7379.79	-0.0201652	-2.84472e-07	70886.4		7379.79	-0.020087	-1.87127e-07	107344		7379.79	-0.020087	-1.7488e-07	114861
7384.78	-0.0150828	-2.12248e-07	71062.1		7384.78	-0.0150828	-1.3971e-07	107958		7384.78	-0.015161	-1.3029e-07	116363
7389.77	-0.0101568	-1.4128e-07	71890.9		7389.77	-0.0100786	-9.2294e-08	109201		7389.77	-0.0100786	-8.50353e-08	118523
7394.76	-0.0051526	-6.81446e-08	75612.7		7394.76	-0.00507441	-4.46294e-08	113701		7394.76	-0.0051526	-4.13643e-08	124566
7399.76	-7.02155e-05	3.28409e-09	-21380.5		7399.76	-0.000148406	2.472e-09	-60034.9		7399.76	-0.000148406	2.37554e-09	-62472.5
7404.75	0.00493397	7.53489e-08	65481.7		7404.75	0.00493397	4.93183e-08	100043		7404.75	0.00485578	4.63531e-08	104756
7409.74	0.00985997	1.46694e-07	67214.6		7409.74	0.00985997	9.68025e-08	101857		7409.74	0.00993817	9.0368e-08	109974
7414.73	0.0148642	2.18903e-07	67902.9		7414.73	0.0149424	1.43366e-07	104225		7414.73	0.0148642	1.33696e-07	111179
7419.72	0.0198684	2.89543e-07	68619.7		7419.72	0.0198684	1.90585e-07	104250		7419.72	0.0198684	1.7743e-07	111979
7424.72	0.0248725	3.62914e-07	68535.7		7424.72	0.0249507	2.36171e-07	105647		7424.72	0.0248725	2.20975e-07	112558
7429.71	0.0298767	4.33271e-07	68956.3		7429.71	0.0298767	2.83703e-07	105310		7429.71	0.0299549	2.65368e-07	112881
7434.7	0.0348809	5.02529e-07	69410.8		7434.7	0.0349591	3.28379e-07	106460		7434.7	0.0349591	3.09542e-07	112938
7439.69	0.0398851	5.74927e-07	69374.3		7439.69	0.0399633	3.76194e-07	106231		7439.69	0.0399633	3.53056e-07	113193
7444.68	0.0448893	6.45064e-07	69588.9		7444.68	0.0448893	4.25548e-07	105486		7444.68	0.0448893	3.97574e-07	112908
7449.68	0.0498153	7.16049e-07	69569.7		7449.68	0.0498935	4.69595e-07	106248		7449.68	0.0498935	4.42532e-07	112745
7454.67	0.0548977	7.87568e-07	69705.4		7454.67	0.0549759	5.16469e-07	106446		7454.67	0.0548977	4.85795e-07	113006
7459.66	0.0599019	8.55727e-07	70001.2		7459.66	0.0599019	5.61458e-07	106690		7459.66	0.0599019	5.27959e-07	113459
7464.65	0.0648279	9.27371e-07	69905		7464.65	0.0649061	6.08174e-07	106723		7464.65	0.0649061	5.71881e-07	113496
7469.64	0.0698321	9.97697e-07	69993.3		7469.64	0.0699885	6.57088e-07	106513		7469.64	0.0698321	6.15238e-07	113504
7474.64	0.0749144	1.07365e-06	69775.7		7474.64	0.0749144	7.0506e-07	106253		7474.64	0.0749144	6.59945e-07	113516
7479.63	0.0799186	1.14147e-06	70013.5		7479.63	0.0799968	7.50772e-07	106553		7479.63	0.0799186	7.0371e-07	113567
7484.62	0.0849228	1.21307e-06	70006.5		7484.62	0.0848446	7.96484e-07	106524		7484.62	0.0849228	7.47884e-07	113551
7489.61	0.089927	1.29157e-06	69625.9		7489.61	0.089927	8.45523e-07	106357		7489.61	0.089927	7.93376e-07	113347
7494.6	0.094853	1.35658e-06	69920.9		7494.6	0.094853	8.87405e-07	106888		7494.6	0.0949312	8.3893e-07	113157
7499.6	0.0998572	1.431e-06	69781.6		7499.6	0.0999354	9.40118e-07	106301		7499.6	0.0999354	8.80561e-07	113491
7504.59	0.104861	1.50008e-06	69903.8		7504.59	0.104861	9.85955e-07	106355		7504.59	0.10494	9.23196e-07	113670
7509.58	0.109944	1.57136e-06	69967.2		7509.58	0.109944	1.03754e-06	105966		7509.58	0.109944	9.69535e-07	113398
7514.57	0.11487	1.64453e-06	69849.7		7514.57	0.11487	1.08244e-06	106121		7514.57	0.114948	1.0111e-06	113686
7519.56	0.119874	1.71016e-06	70095.3		7519.56	0.119952	1.12734e-06	106402		7519.56	0.119874	1.06203e-06	112873
7524.56	0.124878	1.79055e-06	69743.1		7524.56	0.124956	1.17727e-06	106141		7524.56	0.124956	1.10505e-06	113078
7529.55	0.129882	1.86088e-06	69796		7529.55	0.129882	1.22751e-06	105809		7529.55	0.129961	1.15027e-06	112983
7534.54	0.134887	1.9262e-06	70027.3		7534.54	0.134965	1.2787e-06	105548		7534.54	0.134965	1.19109e-06	113312
7539.53	0.139891	1.99026e-06	70287.7		7539.53	0.139891	1.31984e-06	105991		7539.53	0.139969	1.23411e-06	113417
7544.52	0.144895	2.07128e-06	69954.4		7544.52	0.144817	1.37887e-06	105026		7544.52	0.144973	1.28058e-06	113209
7549.52	0.149899	2.15166e-06	69666.6		7549.52	0.149977	1.42691e-06	105106		7549.52	0.149899	1.32674e-06	112983
7554.51	0.154825	2.20944e-06	70074.3		7554.51	0.154825	1.46868e-06	105418		7554.51	0.154903	1.37416e-06	112726
7559.5	0.159829	2.29548e-06	69627.8		7559.5	0.159907	1.51704e-06	105408		7559.5	0.159907	1.41216e-06	113236
7564.49	0.164912	2.36833e-06	69631.9		7564.49	0.164912	1.5654e-06	105348		7564.49	0.164912	1.45989e-06	112962
7569.48	0.169916	2.43428e-06	69801.3		7569.48	0.169916	1.61344e-06	105313		7569.48	0.169838	1.50636e-06	112747
7574.48	0.174842	2.50713e-06	69737.9		7574.48	0.17492	1.65991e-06	105379		7574.48	0.17492	1.55127e-06	112760
7579.47	0.179846	2.58877e-06	69471.5		7579.47	0.179924	1.70859e-06	105306		7579.47	0.179924	1.59083e-06	113101
7584.46	0.184928	2.65786e-06	69578		7584.46	0.18485	1.75663e-06	105230		7584.46	0.184928	1.64107e-06	112687
7589.45	0.189933	2.73322e-06	69490.4		7589.45	0.189854	1.81033e-06	104873		7589.45	0.189854	1.67813e-06	113135
7594.44	0.194859	2.78723e-06	69911.2		7594.44	0.194937	1.84707e-06	105539		7594.44	0.194859	1.72397e-06	113029
7599.44	0.199863	2.87233e-06	69582.1		7599.44	0.199941	1.9061e-06	104895		7599.44	0.199941	1.77045e-06	112932
7600.08	0.200176	2.88332e-06	69425.4		7600.08	0.200097	1.91176e-06	104667		7600.08	0.200254	1.77076e-06	113089
7605.07	0.194937	2.81204e-06	69322.2		7605.07	0.194937	1.8568e-06	104985		7605.07	0.194937	1.7268e-06	112889
7610.06	0.190011	2.73008e-06	69599		7610.06	0.190011	1.80468e-06	105288		7610.06	0.190011	1.6753e-06	113419
7615.05	0.184928	2.65063e-06	69767.6		7615.05	0.184928	1.75914e-06	105124		7615.05	0.184928	1.63699e-06	112968
7620.05	0.179924	2.58155e-06	69696.2		7620.05	0.179924	1.7155e-06	104882		7620.05	0.179924	1.58958e-06	113190
7625.04	0.17492	2.50368e-06	69865.3		7625.04	0.17492	1.66243e-06	105220		7625.04	0.17492	1.53996e-06	113587
7630.03	0.169994	2.42643e-06	70059.4		7630.03	0.169994	1.61407e-06	105320		7630.03	0.169994	1.50291e-06	113110
7635.02	0.164912	2.35138e-06	70134.1		7635.02	0.164912	1.56445e-06	105412		7635.02	0.16499	1.45706e-06	113235
7640.01	0.159907	2.28449e-06	69997		7640.01	0.159986	1.52049e-06	105220		7640.01	0.159986	1.41875e-06	112765
7645.01	0.154981	2.21038e-06	70115.2		7645.01	0.154981	1.46868e-06	105524		7645.01	0.154981	1.36725e-06	113353
7650	0.149977	2.13408e-06	70277.3		7650	0.149977	1.42252e-06	105431		7650	0.149977	1.32078e-06	113552
7654.99	0.144973	2.07159e-06	69981.6		7654.99	0.144973	1.37133e-06	105717		7654.99	0.144973	1.27744e-06	113487
7659.98	0.139891	1.99591e-06	70088.6		7659.98	0.139969	1.32894e-06	105324		7659.98	0.139969	1.23694e-06	113158
7664.97	0.134887	1.92337e-06	70130.2		7664.97	0.134965	1.27587e-06	105782		7664.97	0.134965	1.18732e-06	113672
7669.97	0.129961	1.84236e-06	70540.3		7669.97	0.129961	1.22092e-06	106445		7669.97	0.129882	1.14493e-06	113441
7674.96	0.124956	1.7761e-06	70354.3		7674.96	0.124956	1.17288e-06	106538		7674.96	0.124956	1.10159e-06	113432
7679.95	0.119874	1.70513e-06	70301.8		7679.95	0.12003	1.12954e-06	106265		7679.95	0.119952	1.05889e-06	113281
7684.94	0.114948	1.6282e-06	70598.2		7684.94	0.11487	1.07742e-06	106616		7684.94	0.115026	1.01116e-06	113757
7689.93	0.109866	1.56728e-06	70099.5		7689.93	0.110022	1.0322e-06	106590		7689.93	0.109944	9.70964e-07	113232
7694.93	0.10494	1.48501e-06	70666		7694.93	0.104861	9.83839e-07	106584		7694.93	0.10494	9.27944e-07	113088
7699.92	0.0999354	1.41373e-06	70689.4		7699.92	0.100014	9.36422e-07	106804		7699.92	0.0999354	8.80527e-07	113495
7704.91	0.0949312	1.34527e-06	70566.6		7704.91	0.0949312	8.9089e-07	106558		7704.91	0.0950094	8.37507e-07	113443
7709.9	0.0900052	1.27839e-06	70405.4		7709.9	0.0900052	8.45043e-07	106510		7709.9	0.089927	7.93545e-07	113323
7714.89	0.0849228	1.20491e-06	70480.9		7714.89	0.085001	7.95743e-07	106820		7714.89	0.0849228	7.49583e-07	113293
7719.89	0.0799186	1.13174e-06	70615.7		7719.89	0.0799968	7.52095e-07	106365		7719.89	0.0799186	7.05306e-07	113311
7724.88	0.0750708	1.05952e-06	70853.9		7724.88	0.0749926	7.01538e-07	106897		7724.88	0.0749144	6.63542e-07	112901
7729.87	0.0699885	9.93259e-07	70463.5		7729.87	0.0699103	6.5632e-07	106519		7729.87	0.0699103	6.18638e-07	113007
7734.86	0.0649843	9.20093e-07	70627.9		7734.86	0.0649061	6.09846e-07	106430		7734.86	0.0649843	5.73734e-07	113266
7739.85	0.0599019	8.50382e-07	70441.2		7739.85	0.0599801	5.61487e-07	106824		7739.85	0.0599019	5.29457e-07	113138
7744.85	0.0548977	7.80356e-07	70349.5		7744.85	0.0549759	5.11559e-07	107467		7744.85	0.0548977	4.86751e-07	112784
7749.84	0.0499717	7.10017e-07	70381		7749.84	0.0499717	4.65398e-07	107374		7749.84	0.0499717	4.40277e-07	113501
7754.83	0.0449675	6.40619e-07	70193.8		7754.83	0.0449675	4.2018e-07	107020		7754.83	0.0449675	3.96315e-07	113464
7759.82	0.0399633	5.69651e-07	70154		7759.82	0.0399633	3.73392e-07	107028		7759.82	0.0399633	3.53923e-07	112915
7764.81	0.0349591	4.9994e-07	69926.6		7764.81	0.0349591	3.28173e-07	106526		7764.81	0.0349591	3.0839e-07	113360
7769.81	0.0299549	4.28344e-07	69931.9		7769.81	0.0299549	2.81071e-07	106574		7769.81	0.0299549	2.64742e-07	113148
7774.8	0.0250289	3.56121e-07	70282.1		7774.8	0.0249507	2.37109e-07	105229		7774.8	0.0249507	2.2078e-07	113012
7779.79	0.0198684	2.86723e-07	69294.6		7779.79	0.0198684	1.8718e-07	106146		7779.79	0.0199465	1.78388e-07	111816
7784.78	0.0149424	2.16698e-07	68954.9		7784.78	0.0149424	1.42276e-07	105024		7784.78	0.0149424	1.32855e-07	112471
7789.77	0.0100164	1.46044e-07	68584.5		7789.77	0.0100164	9.48595e-08	105592		7789.77	0.00993817	8.95212e-08	111015
7794.77	0.00493397	7.50765e-08	65719.3		7794.77	0.00493397	4.90229e-08	100646		7794.77	0.00493397	4.63229e-08	106513
7799.76	-7.02155e-05	4.33577e-09	-16194.5		7799.76	-7.02155e-05	2.65869e-09	-26409.9		7799.76	-7.02155e-05	2.64935e-09	-26502.9
7804.75	-0.00507441	-6.66027e-08	76189.2		7804.75	-0.00499622	-4.34751e-08	114921		7804.75	-0.00499622	-4.11011e-08	121559
7809.74	-0.0100786	-1.37183e-07	73468.3		7809.74	-0.0100786	-8.94316e-08	112696		7809.74	-0.0100786	-8.52156e-08	118272
7814.73	-0.0150046	-2.08607e-07	71927.4		7814.73	-0.0150828	-1.35739e-07	111116		7814.73	-0.0150828	-1.29052e-07	116874
7819.73	-0.020087	-2.77897e-07	72282.1		7819.73	-0.0200088	-1.81231e-07	110405		7819.73	-0.020087	-1.71969e-07	116806
7824.72	-0.025013	-3.48851e-07	71701.1		7824.72	-0.025013	-2.28292e-07	109566		7824.72	-0.025013	-2.16142e-07	115725
7829.71	-0.0300172	-4.21719e-07	71178.1		7829.71	-0.0300172	-2.7413e-07	109500		7829.71	-0.0300172	-2.59217e-07	115799
7834.7	-0.0350995	-4.90475e-07	71562.4		7834.7	-0.0350995	-3.18962e-07	110043		7834.7	-0.0350214	-3.02197e-07	115889
7839.69	-0.0400255	-5.60298e-07	71436.1		7839.69	-0.0400255	-3.68284e-07	108681		7839.69	-0.0401037	-3.46339e-07	115793
7844.69	-0.0450297	-6.31189e-07	71341.1		7844.69	-0.0451079	-4.14027e-07	108949		7844.69	-0.0450297	-3.89445e-07	115625
7849.68	-0.0500339	-7.08704e-07	70599.2		7849.68	-0.0501121	-4.58923e-07	109195		7849.68	-0.0500339	-4.35031e-07	115012
7854.67	-0.0550381	-7.74823e-07	71033.2		7854.67	-0.0550381	-5.07177e-07	108518		7854.67	-0.0550381	-4.79958e-07	114673
7859.66	-0.0601205	-8.46216e-07	71046.3		7859.66	-0.0601205	-5.53266e-07	108665		7859.66	-0.0601205	-5.22655e-07	115029
7864.65	-0.0651247	-9.16008e-07	71096.2		7864.65	-0.0650465	-5.9835e-07	108710		7864.65	-0.0650465	-5.65479e-07	115029
7869.65	-0.0701289	-9.96662e-07	70363.7		7869.65	-0.0700507	-6.47044e-07	108263		7869.65	-0.0701289	-6.11033e-07	114771
7874.64	-0.0750549	-1.07014e-06	70135.6		7874.64	-0.0751331	-6.93132e-07	108396		7874.64	-0.0750549	-6.52695e-07	114992
7879.63	-0.0801373	-1.13671e-06	70499.2		7879.63	-0.0799809	-7.45405e-07	107299		7879.63	-0.0800591	-6.97559e-07	114770
7884.62	-0.0850633	-1.20988e-06	70307.4		7884.62	-0.0850633	-7.9118e-07	107514		7884.62	-0.0851415	-7.43051e-07	114584
7889.61	-0.0901456	-1.27959e-06	70449		7889.61	-0.0900675	-8.38964e-07	107356		7889.61	-0.0900675	-7.85121e-07	114718
7894.61	-0.0950716	-1.35872e-06	69971.5		7894.61	-0.0949934	-8.83576e-07	107510		7894.61	-0.0950716	-8.3146e-07	114343
7899.6	-0.100076	-1.43597e-06	69692.2		7899.6	-0.100076	-9.28001e-07	107840		7899.6	-0.100076	-8.76073e-07	114232
7904.59	-0.10508	-1.50819e-06	69672.9		7904.59	-0.10508	-9.81122e-07	107102		7904.59	-0.10508	-9.18111e-07	114452
7909.58	-0.110084	-1.57602e-06	69849.5		7909.58	-0.110084	-1.03277e-06	106591		7909.58	-0.110084	-9.63007e-07	114313
7914.57	-0.115088	-1.6495e-06	69771.7		7914.57	-0.115088	-1.08019e-06	106545		7914.57	-0.115088	-1.0047e-06	114550
7919.57	-0.120014	-1.72392e-06	69617.1		7919.57	-0.120093	-1.13357e-06	105942		7919.57	-0.120093	-1.05821e-06	113487
7924.56	-0.125097	-1.79928e-06	69525.9		7924.56	-0.125019	-1.18224e-06	105747		7924.56	-0.125019	-1.10343e-06	113300
7929.55	-0.130101	-1.86868e-06	69621.8		7929.55	-0.130023	-1.23249e-06	105496		7929.55	-0.130023	-1.14739e-06	113321
7934.54	-0.135105	-1.95566e-06	69084		7934.54	-0.135105	-1.27708e-06	105793		7934.54	-0.135027	-1.19323e-06	113161
7939.53	-0.140031	-2.02852e-06	69031.3		7939.53	-0.140031	-1.32355e-06	105800		7939.53	-0.140031	-1.23531e-06	113357
7944.53	-0.145035	-2.10043e-06	69050.5		7944.53	-0.144957	-1.37002e-06	105806		7944.53	-0.145035	-1.2821e-06	113123
7949.52	-0.150118	-2.17045e-06	69164.3		7949.52	-0.15004	-1.41776e-06	105829		7949.52	-0.150118	-1.32481e-06	113313
7954.51	-0.155044	-2.24707e-06	68998.1		7954.51	-0.155044	-1.46423e-06	105888		7954.51	-0.155044	-1.37191e-06	113013
7959.5	-0.160126	-2.31521e-06	69162.6		7959.5	-0.160048	-1.51824e-06	105417		7959.5	-0.160126	-1.41744e-06	112968
7964.49	-0.165052	-2.39654e-06	68870.9		7964.49	-0.165052	-1.57225e-06	104978		7964.49	-0.165052	-1.46392e-06	112747
7969.49	-0.170056	-2.47285e-06	68769.4		7969.49	-0.170056	-1.61119e-06	105547		7969.49	-0.170134	-1.5151e-06	112293
7974.48	-0.175139	-2.54036e-06	68942.4		7974.48	-0.17506	-1.67148e-06	104734		7974.48	-0.17506	-1.55498e-06	112581
7979.47	-0.180065	-2.6173e-06	68798		7979.47	-0.180065	-1.72172e-06	104584		7979.47	-0.180065	-1.60208e-06	112394
7984.46	-0.185069	-2.69831e-06	68586.9		7984.46	-0.185069	-1.77448e-06	104295		7984.46	-0.185069	-1.64824e-06	112283
7989.45	-0.190073	-2.763e-06	68792.3		7989.45	-0.190073	-1.81718e-06	104598		7989.45	-0.190073	-1.68844e-06	112573
7994.45	-0.195077	-2.84276e-06	68622.5		7994.45	-0.195077	-1.86617e-06	104533		7994.45	-0.194999	-1.73303e-06	112519
7999.44	-0.200081	-2.92221e-06	68469.3		7999.44	-0.200003	-1.91673e-06	104346		7999.44	-0.200081	-1.78735e-06	111943
8000.08	-0.200316	-2.93351e-06	68285.4		8000.08	-0.200316	-1.92206e-06	104219		8000.08	-0.200316	-1.79269e-06	111740
8005.07	-0.195077	-2.8572e-06	68275.6		8005.07	-0.195077	-1.87842e-06	103852		8005.07	-0.195077	-1.74339e-06	111895
8010.06	-0.190151	-2.77336e-06	68563.5		8010.06	-0.190073	-1.8266e-06	104058		8010.06	-0.190073	-1.69063e-06	112427
8015.05	-0.185147	-2.70585e-06	68424.8		8015.05	-0.185069	-1.76882e-06	104628		8015.05	-0.185069	-1.64856e-06	112261
8020.04	-0.180221	-2.63959e-06	68276.1		8020.04	-0.180065	-1.71827e-06	104794		8020.04	-0.180143	-1.60522e-06	112223
8025.04	-0.175217	-2.55418e-06	68600.1		8025.04	-0.17506	-1.67148e-06	104734		8025.04	-0.175139	-1.56095e-06	112200
8030.03	-0.170134	-2.47724e-06	68678.9		8030.03	-0.170056	-1.6203e-06	104954		8030.03	-0.170056	-1.51416e-06	112311
8035.02	-0.165209	-2.42261e-06	68194.5		8035.02	-0.165052	-1.57194e-06	104999		8035.02	-0.16513	-1.47114e-06	112247
8040.01	-0.160126	-2.33782e-06	68493.7		8040.01	-0.160126	-1.51855e-06	105446		8040.01	-0.160126	-1.42906e-06	112050
8045	-0.155122	-2.25618e-06	68754.3		8045	-0.155044	-1.47208e-06	105323		8045	-0.155122	-1.38102e-06	112325
8050	-0.150118	-2.19149e-06	68500.3		8050	-0.15004	-1.41995e-06	105665		8050	-0.150118	-1.33894e-06	112117
8054.99	-0.145114	-2.11424e-06	68636.2		8054.99	-0.145114	-1.37662e-06	105413		8054.99	-0.145114	-1.28901e-06	112578
8059.98	-0.140109	-2.04108e-06	68644.8		8059.98	-0.140109	-1.32512e-06	105733		8059.98	-0.140109	-1.24944e-06	112137
8064.97	-0.135183	-1.96917e-06	68650		8064.97	-0.135105	-1.2799e-06	105559		8064.97	-0.135183	-1.20108e-06	112551
8069.96	-0.130257	-1.89223e-06	68837.9		8069.96	-0.130101	-1.23343e-06	105479		8069.96	-0.130101	-1.15744e-06	112404
8074.96	-0.125175	-1.82252e-06	68682.3		8074.96	-0.125097	-1.17942e-06	106067		8074.96	-0.125097	-1.1119e-06	112507
8079.95	-0.120093	-1.7437e-06	68872.1		8079.95	-0.120093	-1.13231e-06	106059		8079.95	-0.120093	-1.06669e-06	112585
8084.94	-0.115088	-1.66175e-06	69257.5		8084.94	-0.115088	-1.08898e-06	105685		8084.94	-0.115088	-1.02147e-06	112670
8089.93	-0.110241	-1.59298e-06	69204.2		8089.93	-0.110162	-1.03874e-06	106054		8089.93	-0.110084	-9.77191e-07	112654
8094.92	-0.105158	-1.52954e-06	68751.3		8094.92	-0.10508	-9.86297e-07	106540		8094.92	-0.105158	-9.36683e-07	112267
8099.92	-0.100154	-1.44947e-06	69097		8099.92	-0.100076	-9.41707e-07	106271		8099.92	-0.100154	-8.88952e-07	112665
8104.91	-0.0951498	-1.37568e-06	69165.8		8104.91	-0.0950716	-8.91778e-07	106609		8104.91	-0.0951498	-8.4342e-07	112814
8109.9	-0.0901456	-1.30628e-06	69009.5		8109.9	-0.0901456	-8.43734e-07	106841		8109.9	-0.0901456	-7.99458e-07	112758
8114.89	-0.0851415	-1.22935e-06	69257.5		8114.89	-0.0850633	-7.99772e-07	106359		8114.89	-0.0851415	-7.5581e-07	112649
8119.88	-0.0800591	-1.16152e-06	68926.2		8119.88	-0.0801373	-7.49215e-07	106962		8119.88	-0.0801373	-7.10905e-07	112726
8124.88	-0.0751331	-1.08961e-06	68954.2		8124.88	-0.0750549	-7.02113e-07	106899		8124.88	-0.0752113	-6.67571e-07	112664
8129.87	-0.0700507	-1.01362e-06	69109.6		8129.87	-0.0701289	-6.54382e-07	107168		8129.87	-0.0700507	-6.22353e-07	112558
8134.86	-0.0652029	-9.41393e-07	69262.1		8134.86	-0.0651247	-6.09478e-07	106853		8134.86	-0.0651247	-5.78391e-07	112596
8139.85	-0.0601205	-8.67599e-07	69295.2		8139.85	-0.0600423	-5.62376e-07	106765		8139.85	-0.0601205	-5.338e-07	112627
8144.84	-0.0551163	-7.91607e-07	69625.8		8144.84	-0.0551163	-5.12761e-07	107489		8144.84	-0.0551163	-4.8921e-07	112664
8149.84	-0.0501121	-7.1907e-07	69690.2		8149.84	-0.0501121	-4.65659e-07	107616		8149.84	-0.0501121	-4.4305e-07	113107
8154.83	-0.0451861	-6.49358e-07	69585.8		8154.83	-0.0451079	-4.1573e-07	108503		8154.83	-0.0451079	-3.98774e-07	113117
8159.82	-0.0401037	-5.76507e-07	69563.4		8159.82	-0.0400255	-3.6957e-07	108303		8159.82	-0.0401037	-3.54183e-07	113229
8164.81	-0.0351777	-5.03341e-07	69888.5		8164.81	-0.0350214	-3.23724e-07	108183		8164.81	-0.0350995	-3.09907e-07	113258
8169.8	-0.0301735	-4.30803e-07	70040.2		8169.8	-0.0300954	-2.80704e-07	107214		8169.8	-0.0300954	-2.65631e-07	113298
8174.8	-0.0251694	-3.59522e-07	70007.9		8174.8	-0.0250912	-2.30147e-07	109022		8174.8	-0.0251694	-2.20727e-07	114030
8179.79	-0.020087	-2.851e-07	70456		8179.79	-0.0201652	-1.85243e-07	108858		8179.79	-0.020087	-1.76136e-07	114042
8184.78	-0.015161	-2.13818e-07	70905.9		8184.78	-0.015161	-1.37512e-07	110252		8184.78	-0.0150828	-1.31546e-07	114658
8189.77	-0.010235	-1.41594e-07	72283.7		8189.77	-0.0100786	-9.2608e-08	108831		8189.77	-0.0100786	-8.58202e-08	117439
8194.76	-0.0051526	-6.9055e-08	74615.8		8194.76	-0.00507441	-4.36876e-08	116152		8194.76	-0.0051526	-4.18666e-08	123072
8199.76	-0.000148406	3.27476e-09	-45318.2		8199.76	-7.02155e-05	2.08617e-09	-33657.6		8199.76	-7.02155e-05	2.19819e-09	-31942.5
8204.75	0.00485578	7.54392e-08	64366.9		8204.75	0.00493397	4.91565e-08	100373		8204.75	0.00485578	4.63656e-08	104728
8209.74	0.00985997	1.47887e-07	66672.4		8209.74	0.00985997	9.49294e-08	103866		8209.74	0.00985997	9.03587e-08	109120
8214.73	0.014786	2.18621e-07	67633		8214.73	0.0149424	1.40917e-07	106036		8214.73	0.0148642	1.3423e-07	110737
8219.72	0.0198684	2.90171e-07	68471.3		8219.72	0.0199465	1.85624e-07	107457		8219.72	0.0198684	1.78121e-07	111544
8224.72	0.0248725	3.61281e-07	68845.4		8224.72	0.0248725	2.32246e-07	107096		8224.72	0.0248725	2.22765e-07	111654
8229.71	0.0298767	4.31732e-07	69202		8229.71	0.0298767	2.79999e-07	106703		8229.71	0.0298767	2.6609e-07	112280
8234.7	0.0348027	5.05323e-07	68872.2		8234.7	0.0349591	3.24988e-07	107570		8234.7	0.0348809	3.11111e-07	112117
8239.69	0.0398851	5.77093e-07	69113.9		8239.69	0.0398851	3.72929e-07	106951		8239.69	0.0399633	3.55065e-07	112552
8244.68	0.0448111	6.48423e-07	69107.8		8244.68	0.0449675	4.16977e-07	107842		8244.68	0.0448893	3.97009e-07	113069
8249.68	0.0498153	7.23207e-07	68881.1		8249.68	0.0498153	4.61778e-07	107877		8249.68	0.0498935	4.42093e-07	112857
8254.67	0.0548977	7.9617e-07	68952.2		8254.67	0.0549759	5.09844e-07	107829		8254.67	0.0548977	4.85042e-07	113181
8259.66	0.0599019	8.66652e-07	69118.7		8259.66	0.0598237	5.56372e-07	107525		8259.66	0.0598237	5.30565e-07	112755
8264.65	0.0648279	9.42755e-07	68764.3		8264.65	0.0649843	6.00891e-07	108147		8264.65	0.0649061	5.7411e-07	113055
8269.64	0.0699103	1.01151e-06	69114.7		8269.64	0.0699103	6.49145e-07	107696		8269.64	0.0699103	6.18723e-07	112991
8274.64	0.0749144	1.08935e-06	68770		8274.64	0.0749926	6.92816e-07	108243		8274.64	0.0749144	6.60291e-07	113457
8279.63	0.0798405	1.15843e-06	68921.2		8279.63	0.0798405	7.38057e-07	108177		8279.63	0.0799186	7.06097e-07	113184
8284.62	0.0849228	1.23285e-06	68883.2		8284.62	0.0849228	7.90268e-07	107461		8284.62	0.0848446	7.49862e-07	113147
8289.61	0.0898488	1.30445e-06	68878.8		8289.61	0.089927	8.35728e-07	107603		8289.61	0.0898488	7.92497e-07	113374
8294.6	0.094853	1.36882e-06	69295.4		8294.6	0.0949312	8.79933e-07	107885		8294.6	0.094853	8.39558e-07	112980
8299.6	0.0998572	1.44105e-06	69295		8299.6	0.0998572	9.22065e-07	108297		8299.6	0.0998572	8.8122e-07	113317
8304.59	0.104861	1.52049e-06	68965.5		8304.59	0.10494	9.75626e-07	107561		8304.59	0.104861	9.26115e-07	113227
8309.58	0.109787	1.58581e-06	69231.3		8309.58	0.109866	1.01446e-06	108299		8309.58	0.109866	9.67683e-07	113535
8314.57	0.114792	1.66494e-06	68946.4		8314.57	0.114948	1.07145e-06	107283		8314.57	0.11487	1.01107e-06	113612
8319.56	0.119874	1.73496e-06	69093		8319.56	0.119952	1.12452e-06	106670		8319.56	0.119952	1.06485e-06	112647
8324.56	0.124878	1.81315e-06	68873.4		8324.56	0.124878	1.15686e-06	107946		8324.56	0.124878	1.10819e-06	112687
8329.55	0.129804	1.88161e-06	68985.7		8329.55	0.129882	1.22186e-06	106299		8329.55	0.129882	1.15027e-06	112915
8334.54	0.134808	1.96891e-06	68468.6		8334.54	0.134887	1.25954e-06	107092		8334.54	0.134887	1.1958e-06	112800
8339.53	0.139813	2.03799e-06	68603.2		8339.53	0.139891	1.30005e-06	107604		8339.53	0.139969	1.23945e-06	112928
8344.52	0.144895	2.1099e-06	68673.9		8344.52	0.144895	1.35092e-06	107256		8344.52	0.144895	1.28781e-06	112513
8349.52	0.149899	2.19437e-06	68310.8		8349.52	0.149899	1.39677e-06	107318		8349.52	0.149821	1.33679e-06	112075
8354.51	0.154825	2.25686e-06	68602		8354.51	0.154903	1.45172e-06	106703		8354.51	0.154825	1.37573e-06	112540
8359.5	0.159907	2.32814e-06	68684.6		8359.5	0.159907	1.48783e-06	107477		8359.5	0.159907	1.42252e-06	112412
8364.49	0.164912	2.41669e-06	68238.6		8364.49	0.164912	1.53274e-06	107593		8364.49	0.164834	1.46868e-06	112232
8369.48	0.169916	2.4908e-06	68217.4		8369.48	0.169916	1.58267e-06	107360		8369.48	0.169916	1.51264e-06	112331
8374.48	0.17492	2.56554e-06	68180.7		8374.48	0.17492	1.63448e-06	107019		8374.48	0.174842	1.55692e-06	112300
8379.47	0.179924	2.63085e-06	68390.1		8379.47	0.179924	1.67781e-06	107237		8379.47	0.179924	1.60214e-06	112303
8384.46	0.18485	2.69428e-06	68608.3		8384.46	0.18485	1.72711e-06	107028		8384.46	0.184928	1.64798e-06	112215
8389.45	0.189933	2.76242e-06	68755.8		8389.45	0.189854	1.78332e-06	106461		8389.45	0.189854	1.69132e-06	112252
8394.44	0.194937	2.82272e-06	69060		8394.44	0.194937	1.83451e-06	106261		8394.44	0.194937	1.7381e-06	112155
8399.44	0.199863	2.92697e-06	68283.2		8399.44	0.199941	1.87062e-06	106885		8399.44	0.199863	1.7783e-06	112390
8400.08	0.200176	2.94204e-06	68039.7		8400.08	0.200176	1.87533e-06	106742		8400.08	0.200176	1.77767e-06	112606
8405.07	0.194937	2.82491e-06	69006.3		8405.07	0.194937	1.83325e-06	106334		8405.07	0.195015	1.73591e-06	112342
8410.06	0.189933	2.75928e-06	68834		8410.06	0.190089	1.77673e-06	106988		8410.06	0.189933	1.68409e-06	112780
8415.05	0.185007	2.68643e-06	68867		8415.05	0.184928	1.73716e-06	106454		8415.05	0.184928	1.64013e-06	112752
8420.04	0.180002	2.61735e-06	68772.8		8420.04	0.179924	1.67907e-06	107157		8420.04	0.179924	1.59711e-06	112656
8425.04	0.17492	2.5401e-06	68863.4		8425.04	0.174998	1.63919e-06	106759		8425.04	0.17492	1.55284e-06	112646
8430.03	0.169994	2.4729e-06	68742.8		8430.03	0.169994	1.58801e-06	107049		8430.03	0.169994	1.50605e-06	112874
8435.02	0.164912	2.40288e-06	68630.9		8435.02	0.165068	1.5497e-06	106516		8435.02	0.164912	1.46365e-06	112671
8440.01	0.159907	2.31244e-06	69151		8440.01	0.159907	1.49474e-06	106980		8440.01	0.159907	1.41655e-06	112885
8445	0.154981	2.23927e-06	69210.6		8445	0.154981	1.44638e-06	107151		8445	0.154981	1.37322e-06	112860
8450	0.149977	2.17427e-06	68978.1		8450	0.149977	1.39332e-06	107641		8450	0.149977	1.32643e-06	113068
8454.99	0.144973	2.10456e-06	68885.2		8454.99	0.144973	1.35532e-06	106966		8454.99	0.144895	1.28247e-06	112981
8459.98	0.139891	2.02417e-06	69110.1		8459.98	0.139969	1.29409e-06	108160		8459.98	0.140047	1.23631e-06	113279
8464.97	0.134965	1.9485e-06	69266.1		8464.97	0.134965	1.25358e-06	107664		8464.97	0.134965	1.18763e-06	113642
8469.96	0.129961	1.88161e-06	69068.8		8469.96	0.129961	1.20773e-06	107607		8469.96	0.129961	1.14807e-06	113199
8474.96	0.124956	1.80593e-06	69192.2		8474.96	0.125035	1.1578e-06	107993		8474.96	0.124956	1.10913e-06	112662
8479.95	0.119952	1.71738e-06	69846		8479.95	0.119952	1.10505e-06	108549		8479.95	0.119952	1.06423e-06	112713
8484.94	0.114948	1.65897e-06	69288.6		8484.94	0.114948	1.06799e-06	107630		8484.94	0.114948	1.01744e-06	112978
8489.93	0.109866	1.57482e-06	69764.1		8489.93	0.109944	1.02152e-06	107628		8489.93	0.109944	9.6908e-07	113452
8494.92	0.10494	1.51139e-06	69432.7		8494.92	0.10494	9.71906e-07	107973		8494.92	0.10494	9.27316e-07	113165
8499.92	0.0999354	1.43791e-06	69500.7		8499.92	0.100014	9.24175e-07	108219		8499.92	0.0999354	8.78329e-07	113779
8504.91	0.0949312	1.36976e-06	69304.8		8504.91	0.0950094	8.75503e-07	108520		8504.91	0.0950094	8.38763e-07	113273
8509.9	0.0900052	1.29534e-06	69483.7		8509.9	0.0900052	8.31855e-07	108198		8509.9	0.089927	7.94801e-07	113144
8514.89	0.0849228	1.23631e-06	68690.7		8514.89	0.085001	7.89777e-07	107627		8514.89	0.085001	7.50525e-07	113255
8519.88	0.0799186	1.16534e-06	68579.7		8519.88	0.0799968	7.4393e-07	107533		8519.88	0.0799186	7.04678e-07	113412
8524.88	0.0749144	1.09186e-06	68611.8		8524.88	0.0749144	6.92746e-07	108141		8524.88	0.0749926	6.61658e-07	113340
8529.87	0.0699885	1.01807e-06	68746.5		8529.87	0.0699103	6.45957e-07	108227		8529.87	0.0699103	6.1644e-07	113410
8534.86	0.0649843	9.44586e-07	68796.5		8534.86	0.0649843	5.98541e-07	108571		8534.86	0.0649843	5.71536e-07	113701
8539.85	0.0599801	8.72677e-07	68731.1		8539.85	0.0599801	5.52381e-07	108585		8539.85	0.0599019	5.27573e-07	113542
8544.84	0.0549759	8.02337e-07	68519.7		8544.84	0.0549759	5.0779e-07	108265		8544.84	0.0548977	4.84867e-07	113222
8549.84	0.0498935	7.29172e-07	68424.9		8549.84	0.0499717	4.6006e-07	108620		8549.84	0.0499717	4.40591e-07	113420
8554.83	0.0449675	6.56948e-07	68449.1		8554.83	0.0449675	4.14842e-07	108397		8554.83	0.0449675	3.98199e-07	112927
8559.82	0.0399633	5.8284e-07	68566.5		8559.82	0.0399633	3.70251e-07	107936		8559.82	0.0399633	3.52981e-07	113217
8564.81	0.0349591	5.13443e-07	68087.7		8564.81	0.0348809	3.25033e-07	107315		8564.81	0.0348809	3.0996e-07	112533
8569.8	0.0299549	4.37137e-07	68525.3		8569.8	0.0299549	2.78559e-07	107535		8569.8	0.0299549	2.67882e-07	111821
8574.8	0.0249507	3.66483e-07	68081.5		8574.8	0.0249507	2.31456e-07	107799		8574.8	0.0249507	2.22664e-07	112056
8579.79	0.0199465	2.93946e-07	67858		8579.79	0.0199465	1.86238e-07	107102		8579.79	0.0199465	1.79016e-07	111423
8584.78	0.0148642	2.21094e-07	67230.1		8584.78	0.0150205	1.40078e-07	107230		8584.78	0.0148642	1.34425e-07	110576
8589.77	0.00993817	1.48556e-07	66898.4		8589.77	0.00993817	9.42314e-08	105465		8589.77	0.00993817	8.98352e-08	110627
8594.76	0.00485578	7.60185e-08	63876.3		8594.76	0.00493397	4.8395e-08	101952		8594.76	0.00501217	4.64485e-08	107908
8599.76	-7.02155e-05	4.26732e-09	-16454.3		8599.76	7.97493e-06	3.08807e-09	2582.5		8599.76	-7.02155e-05	2.56845e-09	-27337.7
8604.75	-0.00507441	-6.82082e-08	74395.8		8604.75	-0.00507441	-4.35156e-08	116611		8604.75	-0.00507441	-4.15149e-08	122231
8609.74	-0.0100004	-1.39789e-07	71539.4		8609.74	-0.0100786	-8.91951e-08	112995		8609.74	-0.0100004	-8.56605e-08	116745
8614.73	-0.0150828	-2.13474e-07	70654.1		8614.73	-0.0150046	-1.35236e-07	110951		8614.73	-0.0150828	-1.29428e-07	116534
8619.72	-0.020087	-2.84773e-07	70536.9		8619.72	-0.0200088	-1.80885e-07	110616		8619.72	-0.020087	-1.73884e-07	115519
8624.72	-0.0250912	-3.56417e-07	70398.4		8624.72	-0.025013	-2.27256e-07	110065		8624.72	-0.0250912	-2.17461e-07	115382
8629.71	-0.0301735	-4.29568e-07	70241.6		8629.71	-0.0300172	-2.71492e-07	110564		8629.71	-0.0300172	-2.61666e-07	114716
8634.7	-0.0350214	-4.99329e-07	70136.9		8634.7	-0.0350995	-3.17832e-07	110434		8634.7	-0.0350995	-3.05054e-07	115060
8639.69	-0.0400255	-5.75713e-07	69523.4		8639.69	-0.0398692	-3.63826e-07	109583		8639.69	-0.0401037	-3.50671e-07	114363
8644.68	-0.0450297	-6.47358e-07	69559.3		8644.68	-0.0451079	-4.10448e-07	109899		8644.68	-0.0450297	-3.95221e-07	113935
8649.68	-0.0501121	-7.15988e-07	69990.2		8649.68	-0.0500339	-4.57573e-07	109346		8649.68	-0.0501121	-4.40556e-07	113747
8654.67	-0.0551163	-7.90521e-07	69721.5		8654.67	-0.0550381	-5.02342e-07	109563		8654.67	-0.0550381	-4.8473e-07	113544
8659.66	-0.0601205	-8.65147e-07	69491.6		8659.66	-0.0600423	-5.51539e-07	108863		8659.66	-0.0600423	-5.28903e-07	113522
8664.65	-0.0650465	-9.36226e-07	69477.3		8664.65	-0.0650465	-5.9948e-07	108505		8664.65	-0.0651247	-5.72511e-07	113753
8669.64	-0.0701289	-1.01249e-06	69264.1		8669.64	-0.0700507	-6.4494e-07	108616		8669.64	-0.0699725	-6.16308e-07	113535
8674.64	-0.0751331	-1.09149e-06	68835.2		8674.64	-0.0750549	-6.90495e-07	108697		8674.64	-0.0750549	-6.59633e-07	113783
8679.63	-0.0800591	-1.16497e-06	68721.9		8679.63	-0.0800591	-7.41481e-07	107972		8679.63	-0.0800591	-7.06255e-07	113357
8684.62	-0.0850633	-1.23971e-06	68615.6		8684.62	-0.0849851	-7.84838e-07	108284		8684.62	-0.0851415	-7.49424e-07	113609
8689.61	-0.0900675	-1.3044e-06	69049.2		8689.61	-0.0900675	-8.28634e-07	108694		8689.61	-0.0901456	-7.96234e-07	113215
8694.6	-0.0950716	-1.38227e-06	68779.3		8694.6	-0.0949934	-8.79872e-07	107963		8694.6	-0.0950716	-8.43422e-07	112721
8699.6	-0.100154	-1.45607e-06	68784		8699.6	-0.100076	-9.22098e-07	108531		8699.6	-0.100076	-8.85868e-07	112969
8704.59	-0.105158	-1.52766e-06	68836.1		8704.59	-0.10508	-9.73964e-07	107889		8704.59	-0.105002	-9.28911e-07	113038
8709.58	-0.110084	-1.60616e-06	68538.6		8709.58	-0.110006	-1.0172e-06	108146		8709.58	-0.110084	-9.75345e-07	112867
8714.57	-0.115167	-1.67588e-06	68720.2		8714.57	-0.115088	-1.07391e-06	107168		8714.57	-0.115088	-1.01914e-06	112927
8719.56	-0.120093	-1.74559e-06	68797.8		8719.56	-0.120014	-1.12729e-06	106463		8719.56	-0.120093	-1.07359e-06	111860
8724.56	-0.125097	-1.82755e-06	68450.7		8724.56	-0.125019	-1.16717e-06	107113		8724.56	-0.125097	-1.11473e-06	112222
8729.55	-0.130023	-1.90825e-06	68137.3		8729.55	-0.130023	-1.22055e-06	106528		8729.55	-0.130101	-1.16372e-06	111798
8734.54	-0.135105	-1.98298e-06	68132.3		8734.54	-0.135105	-1.26075e-06	107163		8734.54	-0.135105	-1.20485e-06	112134
8739.53	-0.140031	-2.05835e-06	68030.9		8739.53	-0.140031	-1.31539e-06	106456		8739.53	-0.140109	-1.2642e-06	110828
8744.52	-0.145114	-2.14062e-06	67790.4		8744.52	-0.145114	-1.36249e-06	106506		8744.52	-0.145114	-1.30565e-06	111143
8749.52	-0.150118	-2.21379e-06	67810.4		8749.52	-0.150118	-1.41556e-06	106049		8749.52	-0.150118	-1.34647e-06	111490
8754.51	-0.1552	-2.28538e-06	67910		8754.51	-0.155044	-1.45449e-06	106596		8754.51	-0.155122	-1.38918e-06	111664
8759.5	-0.160048	-2.36294e-06	67732.5		8759.5	-0.160048	-1.49752e-06	106876		8759.5	-0.160204	-1.43911e-06	111322
8764.49	-0.16513	-2.43642e-06	67775.7		8764.49	-0.165052	-1.5487e-06	106575		8764.49	-0.165052	-1.48024e-06	111503
8769.48	-0.170134	-2.51461e-06	67658.3		8769.48	-0.169978	-1.60177e-06	106119		8769.48	-0.170134	-1.53394e-06	110913
8774.48	-0.175139	-2.58432e-06	67769.6		8774.48	-0.17506	-1.64604e-06	106352		8774.48	-0.175139	-1.57351e-06	111305
8779.47	-0.180065	-2.64995e-06	67950.1		8779.47	-0.179986	-1.69692e-06	106067		8779.47	-0.180143	-1.62187e-06	111071
8784.46	-0.185147	-2.72877e-06	67850		8784.46	-0.184991	-1.74276e-06	106148		8784.46	-0.185069	-1.66803e-06	110951
8789.45	-0.190073	-2.81199e-06	67593.9		8789.45	-0.190073	-1.80054e-06	105564		8789.45	-0.190073	-1.7145e-06	110862
8794.44	-0.195155	-2.88798e-06	67575.1		8794.44	-0.195077	-1.84953e-06	105474		8794.44	-0.195077	-1.76506e-06	110522
8799.44	-0.200081	-2.95235e-06	67770.2		8799.44	-0.200003	-1.88595e-06	106049		8799.44	-0.200081	-1.8087e-06	110621
8800.08	-0.200316	-2.95957e-06	67684.1		8800.08	-0.200238	-1.88752e-06	106085		8800.08	-0.200238	-1.80965e-06	110650
8805.07	-0.195155	-2.88264e-06	67700.3		8805.07	-0.195077	-1.83665e-06	106213		8805.07	-0.195077	-1.76349e-06	110620
8810.06	-0.190229	-2.80037e-06	67930.2		8810.06	-0.190073	-1.80337e-06	105399		8810.06	-0.190151	-1.72047e-06	110523
8815.05	-0.185147	-2.73411e-06	67717.5		8815.05	-0.185147	-1.75721e-06	105364		8815.05	-0.185147	-1.67493e-06	110540
8820.05	-0.180143	-2.65184e-06	67931.3		8820.05	-0.180143	-1.69315e-06	106395		8820.05	-0.180143	-1.62909e-06	110579
8825.04	-0.175217	-2.5837e-06	67816.4		8825.04	-0.17506	-1.65484e-06	105787		8825.04	-0.17506	-1.57759e-06	110967
8830.03	-0.170213	-2.49577e-06	68200.4		8830.03	-0.170056	-1.60805e-06	105753		8830.03	-0.170134	-1.53268e-06	111004
8835.02	-0.165209	-2.4336e-06	67886.6		8835.02	-0.165052	-1.56252e-06	105632		8835.02	-0.165209	-1.49469e-06	110530
8840.01	-0.160204	-2.34756e-06	68243		8840.01	-0.160126	-1.51384e-06	105775		8840.01	-0.160204	-1.44727e-06	110694
8845.01	-0.1552	-2.26874e-06	68408.1		8845.01	-0.155122	-1.47239e-06	105354		8845.01	-0.155122	-1.39986e-06	110813
8850	-0.150196	-2.19526e-06	68418.3		8850	-0.15004	-1.42247e-06	105479		8850	-0.150118	-1.3515e-06	111075
8854.99	-0.145114	-2.11801e-06	68514.1		8854.99	-0.145114	-1.36814e-06	106066		8854.99	-0.145114	-1.30879e-06	110876
8859.98	-0.140109	-2.04798e-06	68413.3		8859.98	-0.140109	-1.32135e-06	106035		8859.98	-0.140109	-1.26169e-06	111049
8864.97	-0.135105	-1.98958e-06	67906.4		8864.97	-0.135183	-1.27456e-06	106062		8864.97	-0.135183	-1.21836e-06	110956
8869.97	-0.130101	-1.91296e-06	68010.4		8869.97	-0.130101	-1.22432e-06	106264		8869.97	-0.130101	-1.17094e-06	111108
8874.96	-0.125175	-1.83948e-06	68049.2		8874.96	-0.125097	-1.17282e-06	106663		8874.96	-0.125175	-1.12541e-06	111226
8879.95	-0.120093	-1.75909e-06	68269.7		8879.95	-0.120093	-1.12572e-06	106681		8879.95	-0.120171	-1.07925e-06	111347
8884.94	-0.115167	-1.68404e-06	68387.1		8884.94	-0.115088	-1.08521e-06	106052		8884.94	-0.115088	-1.03434e-06	111267
8889.93	-0.110084	-1.62249e-06	67848.8		8889.93	-0.110084	-1.0312e-06	106753		8889.93	-0.110162	-9.84099e-07	111942
8894.93	-0.10508	-1.54305e-06	68099		8894.93	-0.105158	-9.85983e-07	106653		8894.93	-0.10508	-9.43905e-07	111325
8899.92	-0.100076	-1.47145e-06	68011.6		8899.92	-0.100154	-9.40765e-07	106460		8899.92	-0.100232	-8.97745e-07	111649
8904.91	-0.0950716	-1.40582e-06	67627.1		8904.91	-0.0950716	-8.8487e-07	107441		8904.91	-0.0951498	-8.50642e-07	111856
8909.9	-0.0899893	-1.32606e-06	67862		8909.9	-0.0901456	-8.41222e-07	107160		8909.9	-0.0902238	-8.07622e-07	111715
8914.89	-0.0850633	-1.25478e-06	67791.3		8914.89	-0.0851415	-7.94748e-07	107130		8914.89	-0.0851415	-7.62404e-07	111675
8919.89	-0.0800591	-1.17973e-06	67862.1		8919.89	-0.0800591	-7.50471e-07	106678		8919.89	-0.0802155	-7.2064e-07	111311
8924.88	-0.0751331	-1.10217e-06	68168.4		8924.88	-0.0751331	-6.98345e-07	107587		8924.88	-0.0751331	-6.70083e-07	112125
8929.87	-0.0701289	-1.02806e-06	68214.7		8929.87	-0.0700507	-6.503e-07	107721		8929.87	-0.0701289	-6.28005e-07	111669
8934.86	-0.0651247	-9.5364e-07	68290.7		8934.86	-0.0650465	-6.06966e-07	107167		8934.86	-0.0652029	-5.82159e-07	112002
8939.85	-0.0601205	-8.79218e-07	68379.5		8939.85	-0.0601205	-5.56724e-07	107990		8939.85	-0.0601205	-5.37569e-07	111838
8944.85	-0.0551163	-8.07308e-07	68271.7		8944.85	-0.0551163	-5.11191e-07	107819		8944.85	-0.0551163	-4.91722e-07	112088
8949.84	-0.0500339	-7.32886e-07	68269.7		8949.84	-0.0501121	-4.64717e-07	107834		8949.84	-0.0501903	-4.46818e-07	112328
8954.83	-0.0451079	-6.59407e-07	68406.8		8954.83	-0.0451079	-4.18871e-07	107689		8954.83	-0.0451079	-4.00972e-07	112497
8959.82	-0.0400255	-5.85613e-07	68348.1		8959.82	-0.0401037	-3.73024e-07	107510		8959.82	-0.0401037	-3.55753e-07	112729
8964.81	-0.0350995	-5.14331e-07	68243.1		8964.81	-0.0350214	-3.24666e-07	107869		8964.81	-0.0351777	-3.12419e-07	112598
8969.81	-0.0300954	-4.41794e-07	68120.8		8969.81	-0.0300954	-2.77877e-07	108304		8969.81	-0.0301735	-2.67515e-07	112792
8974.8	-0.0250912	-3.65174e-07	68710.2		8974.8	-0.0251694	-2.30461e-07	109213		8974.8	-0.0251694	-2.22925e-07	112905
8979.79	-0.020087	-2.91066e-07	69011.7		8979.79	-0.0200088	-1.84615e-07	108381		8979.79	-0.0201652	-1.78334e-07	113075
8984.78	-0.0150046	-2.16958e-07	69158.9		8984.78	-0.0150828	-1.37826e-07	109433		8984.78	-0.015161	-1.3343e-07	113625
8989.77	-0.0100004	-1.44421e-07	69245		8989.77	-0.0101568	-9.07239e-08	111953		8989.77	-0.010235	-8.88398e-08	115207
8994.77	-0.00507441	-6.84585e-08	74123.8		8994.77	-0.00499622	-4.35934e-08	114609		8994.77	-0.00507441	-4.24945e-08	119413
8999.76	7.97493e-06	4.42289e-09	1803.1		8999.76	-0.000148406	2.45955e-09	-60338.7		8999.76	-7.02155e-05	2.02706e-09	-34639.2
9004.75	0.00493397	7.78008e-08	63418.1		9004.75	0.00485578	4.82542e-08	100629		9004.75	0.00485578	4.68167e-08	103719
9009.74	0.00993817	1.50681e-07	65954.9		9009.74	0.00993817	9.47863e-08	104848		9009.74	0.00985997	9.12454e-08	108060
9014.73	0.0149424	2.23361e-07	66897.7		9014.73	0.014786	1.39222e-07	106204		9014.73	0.0148642	1.35768e-07	109482
9019.73	0.0199465	2.96544e-07	67263.4		9019.73	0.0199465	1.86723e-07	106824		9019.73	0.0198684	1.80789e-07	109898
9024.72	0.0248725	3.68094e-07	67571.2		9024.72	0.0248725	2.31807e-07	107299		9024.72	0.0248725	2.26344e-07	109888
9029.71	0.0298767	4.42281e-07	67551.4		9029.71	0.0299549	2.77989e-07	107756		9029.71	0.0298767	2.71522e-07	110034
9034.7	0.0349591	5.12827e-07	68169.5		9034.7	0.0348809	3.24141e-07	107611		9034.7	0.0348809	3.14282e-07	110986
9039.69	0.0398851	5.86826e-07	67967.6		9039.69	0.0398851	3.68816e-07	108144		9039.69	0.0399633	3.58393e-07	111507
9044.69	0.0449675	6.6343e-07	67780.3		9044.69	0.0448893	4.13335e-07	108603		9044.69	0.0448111	4.02127e-07	111435
9049.68	0.0498935	7.33693e-07	68003.2		9049.68	0.0498935	4.61527e-07	108105		9049.68	0.0498935	4.47524e-07	111488
9054.67	0.0549759	8.03705e-07	68403.1		9054.67	0.0549759	5.06077e-07	108632		9054.67	0.0548977	4.92012e-07	111578
9059.66	0.0599019	8.8392e-07	67768.4		9059.66	0.0599019	5.5047e-07	108820		9059.66	0.0599801	5.34458e-07	112226
9064.65	0.0649843	9.51828e-07	68273.1		9064.65	0.0649061	5.97783e-07	108578		9064.65	0.0648279	5.81394e-07	111504
9069.65	0.0699103	1.03e-06	67874.1		9069.65	0.0699885	6.43526e-07	108758		9069.65	0.0699103	6.26007e-07	111676
9074.64	0.0749144	1.10254e-06	67947.4		9074.64	0.0749144	6.88703e-07	108776		9074.64	0.0749144	6.7062e-07	111709
9079.63	0.0799186	1.17319e-06	68120.8		9079.63	0.0799968	7.35765e-07	108726		9079.63	0.0799186	7.17556e-07	111376
9084.62	0.0849228	1.24793e-06	68051.2		9084.62	0.0848446	7.80252e-07	108740		9084.62	0.0848446	7.60034e-07	111633
9089.61	0.089927	1.31732e-06	68265		9089.61	0.0900052	8.29355e-07	108524		9089.61	0.0898488	8.08477e-07	111133
9094.61	0.094853	1.39489e-06	68000.6		9094.61	0.0949312	8.72021e-07	108863		9094.61	0.0949312	8.48129e-07	111930
9099.6	0.0999354	1.47716e-06	67653.9		9099.6	0.0998572	9.22787e-07	108213		9099.6	0.0998572	8.93966e-07	111701
9104.59	0.10494	1.54624e-06	67867.6		9104.59	0.105018	9.67463e-07	108550		9104.59	0.104861	9.41939e-07	111325
9109.58	0.109944	1.62443e-06	67681.4		9109.58	0.109866	1.01195e-06	108568		9109.58	0.109944	9.77039e-07	112528
9114.57	0.11487	1.69979e-06	67578.6		9114.57	0.11487	1.06831e-06	107525		9114.57	0.11487	1.02968e-06	111558
9119.57	0.119874	1.76731e-06	67828.6		9119.57	0.119952	1.11478e-06	107601		9119.57	0.119874	1.07145e-06	111880
9124.56	0.124956	1.83357e-06	68149.4		9124.56	0.124878	1.15812e-06	107829		9124.56	0.124878	1.12075e-06	111424
9129.55	0.129961	1.90296e-06	68293.8		9129.55	0.129882	1.2093e-06	107403		9129.55	0.129882	1.16817e-06	111185
9134.54	0.134887	1.98806e-06	67848.3		9134.54	0.134887	1.25954e-06	107092		9134.54	0.134887	1.21024e-06	111454
9139.53	0.139969	2.06091e-06	67916		9139.53	0.139891	1.30288e-06	107370		9139.53	0.139891	1.26425e-06	110651
9144.53	0.144895	2.13973e-06	67716.4		9144.53	0.144895	1.35061e-06	107281		9144.53	0.144817	1.30319e-06	111125
9149.52	0.149899	2.21509e-06	67671.6		9149.52	0.149899	1.40619e-06	106599		9149.52	0.149899	1.35532e-06	110601
9154.51	0.154903	2.28983e-06	67648.4		9154.51	0.154903	1.45078e-06	106772		9154.51	0.154903	1.39457e-06	111076
9159.5	0.159986	2.35044e-06	68066.4		9159.5	0.159907	1.49663e-06	106845		9159.5	0.159907	1.44042e-06	111015
9164.49	0.164912	2.41952e-06	68158.9		9164.49	0.16499	1.54436e-06	106834		9164.49	0.164912	1.49129e-06	110583
9169.49	0.169838	2.50807e-06	67716.4		9169.49	0.169916	1.58518e-06	107190		9169.49	0.169994	1.52866e-06	111205
9174.48	0.17492	2.57433e-06	67947.8		9174.48	0.174998	1.63982e-06	106718		9174.48	0.174842	1.56948e-06	111401
9179.47	0.179846	2.63964e-06	68132.7		9179.47	0.179924	1.67813e-06	107217		9179.47	0.179846	1.62129e-06	110928
9184.46	0.184928	2.72254e-06	67924.9		9184.46	0.18485	1.72052e-06	107439		9184.46	0.18485	1.6596e-06	111382
9189.45	0.189933	2.78912e-06	68097.8		9189.45	0.189933	1.77798e-06	106825		9189.45	0.189854	1.71424e-06	110751
9194.45	0.194859	2.85537e-06	68242.8		9194.45	0.194937	1.82289e-06	106938		9194.45	0.194937	1.74784e-06	111530
9199.44	0.199941	2.93011e-06	68236.7		9199.44	0.199863	1.88224e-06	106184		9199.44	0.199863	1.79494e-06	111348
9200.08	0.200176	2.94393e-06	67996.1		9200.08	0.200097	1.88349e-06	106237		9200.08	0.200176	1.79212e-06	111698
9205.07	0.194937	2.85349e-06	68315.3		9205.07	0.195015	1.81881e-06	107221		9205.07	0.194937	1.74847e-06	111490
9210.06	0.189933	2.77813e-06	68367.2		9210.06	0.190011	1.78364e-06	106530		9210.06	0.189933	1.70388e-06	111471
9215.05	0.185007	2.7037e-06	68427.1		9215.05	0.184928	1.73151e-06	106802		9215.05	0.184928	1.6618e-06	111282
9220.04	0.179924	2.64467e-06	68032.8		9220.04	0.179924	1.68315e-06	106897		9220.04	0.179924	1.61187e-06	111625
9225.04	0.174998	2.56114e-06	68328.3		9225.04	0.174998	1.6326e-06	107190		9225.04	0.17492	1.56445e-06	111809
9230.03	0.170072	2.48232e-06	68513.4		9230.03	0.169916	1.5811e-06	107467		9230.03	0.169916	1.52583e-06	111360
9235.02	0.164912	2.40099e-06	68684.8		9235.02	0.16499	1.53431e-06	107534		9235.02	0.164912	1.4803e-06	111404
9240.01	0.159907	2.33034e-06	68619.8		9240.01	0.159907	1.48218e-06	107887		9240.01	0.159986	1.4288e-06	111972
9245	0.154903	2.2578e-06	68608		9245	0.154903	1.44419e-06	107260		9245	0.154981	1.39018e-06	111483
9250	0.149977	2.18621e-06	68601.7		9250	0.149977	1.39112e-06	107811		9250	0.149899	1.34653e-06	111323
9254.99	0.144973	2.11932e-06	68405.5		9254.99	0.144973	1.35092e-06	107314		9254.99	0.144895	1.30256e-06	111238
9259.98	0.139969	2.04144e-06	68563.7		9259.98	0.139969	1.29503e-06	108082		9259.98	0.139969	1.25672e-06	111377
9264.97	0.134965	1.97016e-06	68504.4		9264.97	0.134887	1.24855e-06	108034		9264.97	0.134887	1.21213e-06	111281
9269.96	0.129961	1.90328e-06	68282.5		9269.96	0.129961	1.2137e-06	107078		9269.96	0.129882	1.16817e-06	111185
9274.96	0.124956	1.83262e-06	68184.4		9274.96	0.124956	1.16534e-06	107227		9274.96	0.124878	1.12012e-06	111486
9279.95	0.119952	1.75506e-06	68346.4		9279.95	0.119952	1.10819e-06	108242		9279.95	0.119874	1.07396e-06	111619
9284.94	0.115026	1.67216e-06	68788.9		9284.94	0.11487	1.05889e-06	108481		9284.94	0.11487	1.02497e-06	112071
9289.93	0.110022	1.6081e-06	68417.3		9289.93	0.110022	1.02089e-06	107770		9289.93	0.109944	9.785e-07	112359
9294.92	0.105018	1.53431e-06	68446.3		9294.92	0.10494	9.73476e-07	107799		9294.92	0.104861	9.3391e-07	112282
9299.92	0.0999354	1.46177e-06	68366		9299.92	0.0999354	9.24803e-07	108061		9299.92	0.0998572	8.9089e-07	112087
9304.91	0.0949312	1.39426e-06	68087.3		9304.91	0.0949312	8.81155e-07	107735		9304.91	0.0949312	8.48498e-07	111882
9309.9	0.089927	1.31575e-06	68346.4		9309.9	0.089927	8.32169e-07	108063		9309.9	0.089927	8.07048e-07	111427
9314.89	0.0849228	1.24353e-06	68291.8		9314.89	0.085001	7.83496e-07	108489		9314.89	0.0849228	7.57119e-07	112166
9319.88	0.0799186	1.1666e-06	68505.9		9319.88	0.0799968	7.37336e-07	108494		9319.88	0.0799968	7.13471e-07	112123
9324.88	0.0749144	1.09688e-06	68297.5		9324.88	0.0749144	6.92432e-07	108190		9324.88	0.0749144	6.67624e-07	112210
9329.87	0.0699103	1.02183e-06	68416.4		9329.87	0.0699885	6.43445e-07	108771		9329.87	0.0699103	6.23034e-07	112209
9334.86	0.0649061	9.51495e-07	68214.8		9334.86	0.0649843	5.97599e-07	108742		9334.86	0.0649061	5.75932e-07	112697
9339.85	0.0599801	8.79585e-07	68191.3		9339.85	0.0599801	5.51125e-07	108832		9339.85	0.0599019	5.34482e-07	112075
9344.84	0.0548977	8.05477e-07	68155.5		9344.84	0.0549759	5.06534e-07	108533		9344.84	0.0548977	4.90833e-07	111846
9349.84	0.0498935	7.3294e-07	68073.1		9349.84	0.0499717	4.58804e-07	108917		9349.84	0.0498935	4.44987e-07	112123
9354.83	0.0449675	6.60088e-07	68123.5		9354.83	0.0449675	4.139e-07	108643		9354.83	0.0448893	4.01967e-07	111674
9359.82	0.0398851	5.85352e-07	68138.7		9359.82	0.0399633	3.69309e-07	108211		9359.82	0.0399633	3.56435e-07	112120
9364.81	0.0349591	5.11873e-07	68296.5		9364.81	0.0349591	3.21579e-07	108711		9364.81	0.0349591	3.12158e-07	111992
9369.8	0.0299549	4.38393e-07	68329		9369.8	0.0299549	2.78559e-07	107535		9369.8	0.0298767	2.6851e-07	111269
9374.8	0.0249507	3.67425e-07	67907		9374.8	0.0249507	2.31456e-07	107799		9374.8	0.0249507	2.24234e-07	111271
9379.79	0.0199465	2.93632e-07	67930.5		9379.79	0.0199465	1.85296e-07	107647		9379.79	0.0199465	1.79644e-07	111034
9384.78	0.0149424	2.2235e-07	67202		9384.78	0.0149424	1.40078e-07	106672		9384.78	0.0149424	1.34739e-07	110898
9389.77	0.00993817	1.49498e-07	66476.8		9389.77	0.00993817	9.26614e-08	107253		9389.77	0.00993817	9.04632e-08	109859
9394.76	0.00493397	7.69606e-08	64110.4		9394.76	0.00493397	4.8552e-08	101622		9394.76	0.00493397	4.66997e-08	105653
9399.76	-7.02155e-05	4.27665e-09	-16418.3		9399.76	7.97493e-06	2.44088e-09	3267.23		9399.76	-7.02155e-05	2.55912e-09	-27437.4
9404.75	-0.00507441	-6.84292e-08	74155.6		9404.75	-0.00507441	-4.2719e-08	118786		9404.75	-0.00507441	-4.19412e-08	120989
9409.74	-0.0100004	-1.40605e-07	71124.1		9409.74	-0.0100786	-8.93538e-08	112794		9409.74	-0.0100004	-8.62423e-08	115957
9414.73	-0.0150828	-2.14102e-07	70446.9		9414.73	-0.0150046	-1.34232e-07	111781		9414.73	-0.015161	-1.29993e-07	116629
9419.72	-0.020087	-2.86688e-07	70065.7		9419.72	-0.020087	-1.79975e-07	111610		9419.72	-0.0200088	-1.74292e-07	114800
9424.72	-0.0251694	-3.6122e-07	69678.7		9424.72	-0.0250912	-2.25341e-07	111347		9424.72	-0.0250912	-2.1878e-07	114687
9429.71	-0.0300172	-4.33838e-07	69189.8		9429.71	-0.0301735	-2.72497e-07	110730		9429.71	-0.0300954	-2.63235e-07	114329
9434.7	-0.0350214	-5.08182e-07	68915		9434.7	-0.0349432	-3.17424e-07	110084		9434.7	-0.0350995	-3.08005e-07	113958
9439.69	-0.0401037	-5.7901e-07	69262.6		9439.69	-0.0401037	-3.6436e-07	110066		9439.69	-0.0401037	-3.51519e-07	114087
9444.68	-0.0451079	-6.53982e-07	68974.3		9444.68	-0.0450297	-4.07999e-07	110367		9444.68	-0.0451079	-3.96823e-07	113673
9449.68	-0.0500339	-7.2525e-07	68988.6		9449.68	-0.0501121	-4.55155e-07	110099		9449.68	-0.0500339	-4.40619e-07	113554
9454.67	-0.0550381	-8.0019e-07	68781.3		9454.67	-0.0550381	-5.02499e-07	109529		9454.67	-0.0551163	-4.84824e-07	113683
9459.66	-0.0600423	-8.69982e-07	69015.6		9459.66	-0.0600423	-5.4661e-07	109845		9459.66	-0.0601205	-5.29845e-07	113468
9464.65	-0.0650465	-9.47497e-07	68650.8		9464.65	-0.0650465	-5.93703e-07	109561		9464.65	-0.0651247	-5.76812e-07	112904
9469.64	-0.0699725	-1.02197e-06	68468.4		9469.64	-0.0700507	-6.39446e-07	109549		9469.64	-0.0701289	-6.17783e-07	113517
9474.64	-0.0750549	-1.0984e-06	68331		9474.64	-0.0749767	-6.8588e-07	109315		9474.64	-0.0750549	-6.64719e-07	112912
9479.63	-0.0800591	-1.17533e-06	68116		9479.63	-0.0801373	-7.3247e-07	109407		9479.63	-0.0801373	-7.08767e-07	113066
9484.62	-0.0851415	-1.24505e-06	68384.2		9484.62	-0.0850633	-7.80725e-07	108954		9484.62	-0.0850633	-7.55107e-07	112651
9489.61	-0.0900675	-1.32512e-06	67969.3		9489.61	-0.0901456	-8.3168e-07	108390		9489.61	-0.0900675	-7.96329e-07	113103
9494.6	-0.0950716	-1.39954e-06	67930.5		9494.6	-0.0950716	-8.77988e-07	108284		9494.6	-0.0950716	-8.44175e-07	112621
9499.6	-0.100076	-1.47177e-06	67997.1		9499.6	-0.100154	-9.25521e-07	108214		9499.6	-0.0999976	-8.89071e-07	112474
9504.59	-0.10508	-1.53802e-06	68321.5		9504.59	-0.105002	-9.75785e-07	107608		9504.59	-0.105158	-9.33024e-07	112707
9509.58	-0.110084	-1.61119e-06	68324.8		9509.58	-0.110006	-1.03685e-06	106096		9509.58	-0.110006	-9.78076e-07	112472
9514.57	-0.115088	-1.68844e-06	68162.7		9514.57	-0.115088	-1.07768e-06	106793		9514.57	-0.11501	-1.0334e-06	111293
9519.56	-0.120014	-1.76568e-06	67970.5		9519.56	-0.120093	-1.12666e-06	106591		9519.56	-0.120093	-1.07611e-06	111599
9524.56	-0.125175	-1.83948e-06	68049.2		9524.56	-0.125097	-1.16466e-06	107411		9524.56	-0.125097	-1.1207e-06	111624
9529.55	-0.130101	-1.92175e-06	67699.2		9529.55	-0.130023	-1.21584e-06	106940		9529.55	-0.130101	-1.16717e-06	111467
9534.54	-0.135027	-1.97953e-06	68211.7		9534.54	-0.135027	-1.25729e-06	107395		9534.54	-0.135105	-1.20988e-06	111669
9539.53	-0.140031	-2.0662e-06	67772.4		9539.53	-0.140109	-1.31099e-06	106873		9539.53	-0.140109	-1.26169e-06	111049
9544.52	-0.145114	-2.13246e-06	68050		9544.52	-0.145035	-1.36123e-06	106547		9544.52	-0.145114	-1.30157e-06	111491
9549.52	-0.15004	-2.21222e-06	67823.2		9549.52	-0.15004	-1.40205e-06	107014		9549.52	-0.15004	-1.34961e-06	111172
9554.51	-0.155122	-2.29292e-06	67652.6		9554.51	-0.155122	-1.46015e-06	106237		9554.51	-0.155044	-1.40331e-06	110484
9559.5	-0.15997	-2.36922e-06	67519.9		9559.5	-0.160048	-1.50003e-06	106697		9559.5	-0.160126	-1.44445e-06	110856
9564.49	-0.165052	-2.44993e-06	67370.3		9564.49	-0.165052	-1.55781e-06	105952		9564.49	-0.16513	-1.48935e-06	110874
9569.48	-0.170134	-2.52717e-06	67322.1		9569.48	-0.170056	-1.6115e-06	105527		9569.48	-0.170056	-1.54179e-06	110298
9574.48	-0.17506	-2.59406e-06	67485.2		9574.48	-0.174982	-1.64824e-06	106163		9574.48	-0.17506	-1.58827e-06	110221
9579.47	-0.180065	-2.66848e-06	67478.4		9579.47	-0.180065	-1.69692e-06	106113		9579.47	-0.180143	-1.63411e-06	110239
9584.46	-0.185069	-2.73788e-06	67595.7		9584.46	-0.185069	-1.75187e-06	105641		9584.46	-0.185069	-1.6809e-06	110101
9589.45	-0.190073	-2.81387e-06	67548.6		9589.45	-0.189995	-1.79426e-06	105890		9589.45	-0.190073	-1.72894e-06	109936
9594.44	-0.195077	-2.893e-06	67430.7		9594.44	-0.194999	-1.85078e-06	105360		9594.44	-0.195077	-1.77793e-06	109721
9599.44	-0.20016	-2.98312e-06	67097.3		9599.44	-0.200003	-1.89883e-06	105330		9599.44	-0.200081	-1.81687e-06	110124
9600.08	-0.200316	-2.96931e-06	67462.2		9600.08	-0.20016	-1.90071e-06	105308		9600.08	-0.200316	-1.82284e-06	109893
9605.07	-0.195077	-2.88421e-06	67636.3		9605.07	-0.195077	-1.84921e-06	105492		9605.07	-0.195155	-1.78013e-06	109630
9610.06	-0.190151	-2.82769e-06	67246.2		9610.06	-0.190073	-1.80117e-06	105528		9610.06	-0.190151	-1.72706e-06	110101
9615.05	-0.185069	-2.73505e-06	67665.6		9615.05	-0.185147	-1.74936e-06	105837		9615.05	-0.185147	-1.68153e-06	110106
9620.04	-0.180221	-2.66817e-06	67544.9		9620.04	-0.180065	-1.69786e-06	106054		9620.04	-0.180143	-1.63254e-06	110345
9625.04	-0.175139	-2.58275e-06	67810.8		9625.04	-0.175139	-1.64699e-06	106339		9625.04	-0.175139	-1.58921e-06	110205
9630.03	-0.170134	-2.51869e-06	67548.7		9630.03	-0.170056	-1.60428e-06	106002		9630.03	-0.170134	-1.54399e-06	110191
9635.02	-0.16513	-2.44019e-06	67671.1		9635.02	-0.165209	-1.55686e-06	106116		9635.02	-0.16513	-1.49657e-06	110339
9640.01	-0.160126	-2.36922e-06	67585.9		9640.01	-0.160048	-1.5038e-06	106429		9640.01	-0.160126	-1.45449e-06	110091
9645	-0.155122	-2.28381e-06	67922.4		9645	-0.155122	-1.46486e-06	105896		9645	-0.1552	-1.40582e-06	110398
9650	-0.150196	-2.22321e-06	67558.3		9650	-0.150118	-1.41179e-06	106332		9650	-0.150196	-1.36688e-06	109882
9654.99	-0.145192	-2.1491e-06	67559.4		9654.99	-0.145192	-1.36186e-06	106613		9654.99	-0.145192	-1.32104e-06	109907
9659.98	-0.140109	-2.07876e-06	67400.5		9659.98	-0.140109	-1.3157e-06	106490		9659.98	-0.140188	-1.26891e-06	110479
9664.97	-0.135105	-1.99837e-06	67607.7		9664.97	-0.135183	-1.2664e-06	106746		9664.97	-0.135183	-1.22652e-06	110217
9669.96	-0.130101	-1.92458e-06	67599.8		9669.96	-0.130179	-1.21836e-06	106848		9669.96	-0.130101	-1.1813e-06	110134
9674.96	-0.125175	-1.85706e-06	67404.8		9674.96	-0.125097	-1.17439e-06	106520		9674.96	-0.125175	-1.13043e-06	110732
9679.95	-0.120093	-1.76631e-06	67990.6		9679.95	-0.120093	-1.12258e-06	106979		9679.95	-0.120171	-1.08584e-06	110671
9684.94	-0.115167	-1.69535e-06	67931.1		9684.94	-0.115088	-1.07799e-06	106762		9684.94	-0.115167	-1.03937e-06	110805
9689.93	-0.110084	-1.62249e-06	67848.8		9689.93	-0.110084	-1.02963e-06	106916		9689.93	-0.110162	-9.94148e-07	110811
9694.92	-0.105236	-1.55027e-06	67882.6		9694.92	-0.105158	-9.80017e-07	107302		9694.92	-0.10508	-9.48301e-07	110809
9699.92	-0.100154	-1.47302e-06	67992.2		9699.92	-0.100154	-9.33229e-07	107320		9699.92	-0.100154	-9.03083e-07	110902
9704.91	-0.0951498	-1.39546e-06	68185.3		9704.91	-0.0950716	-8.833e-07	107632		9704.91	-0.0951498	-8.56295e-07	111118
9709.9	-0.0901456	-1.32543e-06	68012.1		9709.9	-0.0900675	-8.36826e-07	107630		9709.9	-0.0902238	-8.1139e-07	111197
9714.89	-0.0851415	-1.25258e-06	67972.7		9714.89	-0.0851415	-7.87839e-07	108070		9714.89	-0.0851415	-7.66172e-07	111126
9719.88	-0.0801373	-1.1769e-06	68091.5		9719.88	-0.0800591	-7.44191e-07	107579		9719.88	-0.0801373	-7.19384e-07	111397
9724.88	-0.0750549	-1.10343e-06	68019.9		9724.88	-0.0751331	-6.97403e-07	107733		9724.88	-0.0751331	-6.76992e-07	110981
9729.87	-0.0701289	-1.02995e-06	68089.9		9729.87	-0.0701289	-6.49986e-07	107893		9729.87	-0.0701289	-6.30517e-07	111224
9734.86	-0.0650465	-9.56466e-07	68007.1		9734.86	-0.0651247	-6.0414e-07	107797		9734.86	-0.0651247	-5.83729e-07	111567
9739.85	-0.0601205	-8.75764e-07	68649.2		9739.85	-0.0601205	-5.55467e-07	108234		9739.85	-0.0601205	-5.40395e-07	111253
9744.84	-0.0551163	-8.04796e-07	68484.8		9744.84	-0.0550381	-5.09307e-07	108065		9744.84	-0.0551945	-4.94548e-07	111606
9749.84	-0.0500339	-7.36027e-07	67978.4		9749.84	-0.0500339	-4.63147e-07	108030		9749.84	-0.0501121	-4.49958e-07	111371
9754.83	-0.0451079	-6.60035e-07	68341.7		9754.83	-0.0451079	-4.1573e-07	108503		9754.83	-0.0451079	-4.05054e-07	111363
9759.82	-0.0401037	-5.86555e-07	68371.7		9759.82	-0.0401037	-3.7114e-07	108056		9759.82	-0.0401037	-3.59522e-07	111548
9764.81	-0.0350995	-5.14017e-07	68284.8		9764.81	-0.0350995	-3.23724e-07	108424		9764.81	-0.0351777	-3.14931e-07	111700
9769.8	-0.0301735	-4.39596e-07	68639.3		9769.8	-0.0300954	-2.77563e-07	108427		9769.8	-0.0301735	-2.68143e-07	112528
9774.8	-0.0251694	-3.67058e-07	68570.5		9774.8	-0.0250912	-2.29205e-07	109470		9774.8	-0.0251694	-2.23867e-07	112430
9779.79	-0.020087	-2.92636e-07	68641.5		9779.79	-0.020087	-1.83045e-07	109738		9779.79	-0.0200088	-1.7802e-07	112396
9784.78	-0.015161	-2.18214e-07	69477.4		9784.78	-0.015161	-1.37198e-07	110504		9784.78	-0.015161	-1.3343e-07	113625
9789.77	-0.0100786	-1.44421e-07	69786.4		9789.77	-0.0101568	-9.00959e-08	112733		9789.77	-0.010235	-8.88398e-08	115207
9794.76	-0.0051526	-6.99027e-08	73711		9794.76	-0.00507441	-4.30597e-08	117846		9794.76	-0.0051526	-4.24004e-08	121522
9799.76	-0.000148406	3.51745e-09	-42191.3		9799.76	-0.000148406	2.24175e-09	-66201		9799.76	-7.02155e-05	2.17952e-09	-32216.1
9804.75	0.00485578	7.74243e-08	62716.6		9804.75	0.00493397	4.81609e-08	102448		9804.75	0.00485578	4.71496e-08	102987
9809.74	0.00993817	1.50964e-07	65831.5		9809.74	0.00993817	9.39151e-08	105821		9809.74	0.00993817	9.19486e-08	108084
9814.73	0.0148642	2.24806e-07	66120.1		9814.73	0.0149424	1.39253e-07	107303		9814.73	0.0148642	1.36176e-07	109154
9819.72	0.0199465	2.98647e-07	66789.6		9819.72	0.0199465	1.85404e-07	107584		9819.72	0.0198684	1.80978e-07	109783
9824.72	0.0248725	3.70731e-07	67090.5		9824.72	0.0249507	2.31179e-07	107928		9824.72	0.0248725	2.2625e-07	109934
9829.71	0.0298767	4.45107e-07	67122.6		9829.71	0.0298767	2.75572e-07	108417		9829.71	0.0298767	2.70925e-07	110277
9834.7	0.0348809	5.17222e-07	67439		9834.7	0.0349591	3.2232e-07	108461		9834.7	0.0348809	3.16323e-07	110270
9839.69	0.0398851	5.93167e-07	67240.9		9839.69	0.0399633	3.67058e-07	108875		9839.69	0.0398851	3.60402e-07	110668
9844.68	0.0448893	6.64843e-07	67518.7		9844.68	0.0449675	4.12487e-07	109016		9844.68	0.0448893	4.0445e-07	110989
9849.68	0.0498153	7.37272e-07	67567.1		9849.68	0.0498935	4.61715e-07	108061		9849.68	0.0498935	4.48812e-07	111168
9854.67	0.0548195	8.11993e-07	67512.3		9854.67	0.0549759	5.05794e-07	108692		9854.67	0.0548977	4.95402e-07	110814
9859.66	0.0599019	8.85176e-07	67672.3		9859.66	0.0599019	5.50438e-07	108826		9859.66	0.0599019	5.37974e-07	111347
9864.65	0.0648279	9.58578e-07	67629.2		9864.65	0.0649061	5.97123e-07	108698		9864.65	0.0649061	5.81677e-07	111584
9869.64	0.0699103	1.0344e-06	67585.6		9869.64	0.0698321	6.43526e-07	108515		9869.64	0.0698321	6.24092e-07	111894
[truncated: 1,241 more rows]
