# Supplementary material for: Long-distance electron transport in multicellular freshwater cable bacteria
Source: eLife. 2024 Aug 29;12:RP91097. doi: 10.7554/eLife.91097 (PMC11361709; doi:10.7554/eLife.91097)
Supplement: Figure 6—source data 1. [file elife-91097-fig6-data1.xlsx]

## Sheet: CablesonITOIDA1zo0037
CablesonITOIDA1zo0037Bias_Ext	CablesonITOIDA1zo0037Cur_Ext	CablesonITOIDA1zo0037Bias_Ret	CablesonITOIDA1zo0037Cur_Ret	CablesonITOIDA1zo0037Bias_Towd	CablesonITOIDA1zo0037Cur_Towd								-9.99992	-6.30096e-12	-6.30096				9.9992	4.40165e-12	4.40165
0	-6.409e-13	-0.00440121	1.37135e-12	0	-6.409e-13								-9.99776	-3.95373e-12	-3.95373				9.99848	4.73186e-12	4.73186
				0.00231862	2.54798e-14								-9.99544	-9.86607e-13	-0.986607				9.99616	4.47318e-12	4.47318
				0.00463963	-7.10041e-13								-9.99312	-2.82243e-12	-2.82243				9.99384	4.22045e-12	4.22045
				0.00695944	6.1795e-13								-9.9908	-4.54739e-12	-4.54739				9.99152	2.449e-12	2.449
				0.00927925	1.49414e-12								-9.98848	-4.67494e-12	-4.67494				9.9892	2.8865e-12	2.8865
				0.0116003	1.76713e-12								-9.98616	-4.123e-12	-4.123				9.98688	3.70309e-12	3.70309
				0.0139189	2.8114e-12								-9.98384	-3.91558e-12	-3.91558				9.98456	3.69832e-12	3.69832
				0.0162399	3.53977e-12								-9.98152	-2.224e-12	-2.224				9.98224	3.53977e-12	3.53977
				0.0185585	2.96637e-12								-9.9792	-3.42086e-12	-3.42086				9.97992	3.10346e-12	3.10346
				0.0208795	1.55255e-12								-9.97688	-2.93329e-12	-2.93329				9.9776	4.6806e-12	4.6806
				0.0232005	1.91375e-12								-9.97456	-4.30659e-12	-4.30659				9.97528	3.49566e-12	3.49566
				0.0255203	1.55494e-12								-9.97224	-3.3541e-12	-3.3541				9.97296	2.97472e-12	2.97472
				0.0278389	1.64315e-12								-9.96992	-4.76197e-12	-4.76197				9.97064	4.12032e-12	4.12032
				0.03016	4.16486e-13								-9.9676	-4.45321e-12	-4.45321				9.96832	6.70358e-12	6.70358
				0.0324798	3.21119e-13								-9.96528	-2.10717e-12	-2.10717				9.966	3.3848e-12	3.3848
				0.0347996	1.73299e-13								-9.96296	-2.53156e-12	-2.53156				9.96368	5.41493e-12	5.41493
				0.0371206	1.42857e-12								-9.96064	-6.15866e-13	-0.615866				9.96136	5.04896e-12	5.04896
				0.0394392	1.63361e-12								-9.95832	-2.20135e-12	-2.20135				9.95904	4.09886e-12	4.09886
				0.0417602	2.34768e-12								-9.956	-1.90571e-12	-1.90571				9.95672	3.08558e-12	3.08558
				0.0440788	1.52036e-12								-9.95368	-3.54245e-12	-3.54245				9.9544	2.76372e-12	2.76372
				0.0463998	2.23562e-12								-9.95136	-2.56494e-12	-2.56494				9.95208	4.48152e-12	4.48152
				0.0487185	1.75163e-12								-9.94904	-4.13135e-12	-4.13135				9.94976	4.33251e-12	4.33251
				0.0510395	2.6612e-12								-9.94672	-3.5663e-12	-3.5663				9.94744	3.94747e-12	3.94747
				0.0533593	2.24873e-12								-9.9444	-3.30165e-12	-3.30165				9.94512	4.47199e-12	4.47199
				0.0556803	1.21876e-12								-9.94208	-4.86091e-12	-4.86091				9.9428	2.87339e-12	2.87339
				0.0580001	2.92509e-13								-9.93976	-3.81067e-12	-3.81067				9.94048	4.08575e-12	4.08575
				0.0603199	4.20734e-12								-9.93744	-4.64514e-12	-4.64514				9.93816	4.36112e-12	4.36112
				0.0626385	1.66818e-12								-9.93512	-3.63782e-12	-3.63782				9.93584	4.80696e-12	4.80696
				0.0649595	3.11777e-12								-9.9328	-4.9372e-12	-4.9372				9.93352	4.81292e-12	4.81292
				0.0672805	2.40251e-12								-9.93048	-3.17052e-12	-3.17052				9.9312	4.63053e-12	4.63053
				0.0695992	8.37295e-13								-9.92816	-2.77475e-12	-2.77475				9.92888	4.94882e-12	4.94882
				0.0719202	1.55732e-12								-9.92584	-1.11655e-12	-1.11655				9.92656	3.7162e-12	3.7162
				0.0742388	3.56004e-12								-9.92352	-2.78667e-12	-2.78667				9.92424	5.78567e-12	5.78567
				0.0765598	2.48596e-12								-9.9212	-1.74955e-12	-1.74955				9.92192	4.95836e-12	4.95836
				0.0788784	8.0034e-13								-9.91888	-1.84134e-12	-1.84134				9.9196	3.15115e-12	3.15115
				0.0811994	1.32963e-12								-9.91656	-4.22552e-12	-4.22552				9.91728	3.80322e-12	3.80322
				0.0835204	-2.90425e-13								-9.91424	-2.5256e-12	-2.5256				9.91496	5.63189e-12	5.63189
				0.0858402	2.57537e-12								-9.91192	-3.37914e-12	-3.37914				9.91264	3.67924e-12	3.67924
				0.0881588	1.74448e-12								-9.9096	-2.17989e-12	-2.17989				9.91032	5.06565e-12	5.06565
				0.0904799	7.55041e-13								-9.90728	-1.71736e-12	-1.71736				9.908	3.30254e-12	3.30254
				0.0927997	1.28433e-12								-9.90496	-3.13118e-12	-3.13118				9.90568	2.47642e-12	2.47642
				0.0951195	3.92644e-13								-9.90264	-3.03105e-12	-3.03105				9.90336	3.38122e-12	3.38122
				0.0974405	-4.41821e-13								-9.90032	-3.76538e-12	-3.76538				9.90104	4.46364e-12	4.46364
				0.0997591	3.10942e-12								-9.898	-3.54798e-13	-0.354798				9.89872	4.14178e-12	4.14178
				0.10208	3.957e-12								-9.89568	-3.26188e-13	-0.326188				9.8964	3.6554e-12	3.6554
				0.104399	1.82912e-12								-9.89336	-1.60053e-12	-1.60053				9.89408	4.74498e-12	4.74498
				0.10672	-6.03945e-13								-9.89104	-2.01061e-12	-2.01061				9.89176	4.08456e-12	4.08456
				0.109038	2.48e-12								-9.88872	-1.94386e-12	-1.94386				9.88944	4.32178e-12	4.32178
				0.111361	2.75776e-12								-9.8864	-1.73286e-12	-1.73286				9.88712	4.23595e-12	4.23595
				0.113679	2.12714e-12								-9.88408	-1.31443e-12	-1.31443				9.8848	4.35993e-12	4.35993
				0.116	7.57425e-13								-9.88176	-1.53616e-12	-1.53616				9.88248	4.28602e-12	4.28602
				0.11832	3.29301e-12								-9.87944	-7.46996e-13	-0.746996				9.88016	4.61027e-12	4.61027
				0.12064	2.17602e-12								-9.87712	-4.09558e-12	-4.09558				9.87784	3.60772e-12	3.60772
				0.122958	8.63521e-13								-9.8748	-1.38238e-12	-1.38238				9.87552	3.31804e-12	3.31804
				0.125279	5.54769e-13								-9.87248	-2.64958e-12	-2.64958				9.8732	5.223e-12	5.223
				0.1276	9.18357e-13								-9.87016	-3.67597e-12	-3.67597				9.87088	2.62424e-12	2.62424
				0.129919	1.14366e-12								-9.86784	-3.24682e-12	-3.24682				9.86856	4.56259e-12	4.56259
				0.13224	-9.37295e-14								-9.86552	-3.68193e-12	-3.68193				9.86624	3.47301e-12	3.47301
				0.134559	3.47345e-13								-9.8632	-4.74885e-12	-4.74885				9.86392	3.70547e-12	3.70547
				0.13688	-3.34532e-13								-9.86088	-1.82465e-12	-1.82465				9.8616	5.47334e-12	5.47334
				0.139198	-8.56669e-13								-9.85856	-3.55557e-12	-3.55557				9.85928	3.95819e-12	3.95819
				0.141521	8.83787e-13								-9.85624	-2.80812e-12	-2.80812				9.85696	4.58881e-12	4.58881
				0.14384	1.63361e-12								-9.85392	-3.48166e-12	-3.48166				9.85464	6.44252e-12	6.44252
				0.14616	-5.07386e-13								-9.8516	-3.44589e-12	-3.44589				9.85232	4.81531e-12	4.81531
				0.148479	1.03518e-12								-9.84928	-2.93926e-12	-2.93926				9.85	4.15608e-12	4.15608
				0.1508	1.3797e-12								-9.84696	-3.42921e-12	-3.42921				9.84768	3.8223e-12	3.8223
				0.15312	2.46017e-13								-9.84464	-1.72928e-12	-1.72928				9.84536	3.68997e-12	3.68997
				0.155439	2.55868e-12								-9.84232	-6.99313e-13	-0.699313				9.84304	4.27887e-12	4.27887
				0.15776	2.25946e-12								-9.84	-3.46974e-12	-3.46974				9.84072	4.36708e-12	4.36708
				0.160079	2.58967e-12								-9.83768	-2.93806e-12	-2.93806				9.8384	2.93061e-12	2.93061
				0.1624	2.09853e-12								-9.83536	-2.00465e-12	-2.00465				9.83608	2.04131e-12	2.04131
				0.164719	2.09018e-12								-9.83304	-1.12608e-12	-1.12608				9.83376	3.29777e-12	3.29777
				0.16704	2.60755e-12								-9.83072	-2.46719e-12	-2.46719				9.83144	4.35635e-12	4.35635
				0.169358	1.22949e-12								-9.8284	-8.73358e-13	-0.873358				9.82912	4.76882e-12	4.76882
				0.17168	2.06157e-12								-9.82608	9.23126e-13	0.923126				9.8268	4.07502e-12	4.07502
				0.173999	1.12503e-13								-9.82376	-8.48324e-13	-0.848324				9.82448	3.50639e-12	3.50639
				0.17632	-5.91588e-14								-9.82144	-2.67461e-12	-2.67461				9.82216	9.20742e-13	0.920742
				0.17864	8.03916e-13								-9.81912	-3.10138e-12	-3.10138				9.81984	2.30834e-12	2.30834
				0.18096	3.48016e-12								-9.8168	-3.1133e-12	-3.1133				9.81752	3.50162e-12	3.50162
				0.183278	1.02445e-12								-9.81448	-4.15281e-12	-4.15281				9.8152	3.70189e-12	3.70189
				0.185599	-1.84329e-13								-9.81216	-2.83197e-12	-2.83197				9.81288	5.47096e-12	5.47096
				0.18792	2.80306e-12								-9.80984	-2.07737e-12	-2.07737				9.81056	5.76422e-12	5.76422
				0.190239	2.27734e-12								-9.80752	-1.00091e-12	-1.00091				9.80824	4.85107e-12	4.85107
				0.19256	1.7254e-12								-9.8052	-3.73871e-13	-0.373871				9.80592	5.48288e-12	5.48288
				0.194879	-2.22475e-13								-9.80288	-1.56477e-12	-1.56477				9.8036	4.88564e-12	4.88564
				0.1972	2.90915e-12								-9.80056	-5.44341e-13	-0.544341				9.80128	3.51235e-12	3.51235
				0.199519	4.94644e-12								-9.79824	-2.24188e-12	-2.24188				9.79896	5.59732e-12	5.59732
				0.20184	2.07111e-12								-9.79592	-2.08333e-12	-2.08333				9.79664	3.99873e-12	3.99873
				0.20416	6.08413e-13								-9.7936	-1.65776e-12	-1.65776				9.79432	2.61232e-12	2.61232
				0.20648	2.33337e-12								-9.79128	-1.62557e-12	-1.62557				9.792	2.70292e-12	2.70292
				0.208799	9.56504e-13								-9.78896	-2.42189e-12	-2.42189				9.78968	3.66971e-12	3.66971
				0.21112	-8.42364e-13								-9.78664	-1.94386e-12	-1.94386				9.78736	3.70428e-12	3.70428
				0.213439	1.62288e-12								-9.78432	-7.75607e-13	-0.775607				9.78504	4.3945e-12	4.3945
				0.215759	-7.81567e-13								-9.782	-1.26317e-12	-1.26317				9.78272	4.5006e-12	4.5006
				0.21808	-5.45533e-13								-9.77968	-2.05115e-12	-2.05115				9.7804	4.44457e-12	4.44457
				0.220399	6.01261e-13								-9.77736	-1.75312e-12	-1.75312				9.77808	5.50672e-12	5.50672
				0.22272	2.29284e-12								-9.77504	-2.22638e-12	-2.22638				9.77576	5.58182e-12	5.58182
				0.225039	2.22847e-12								-9.77272	-3.56272e-12	-3.56272				9.77344	5.05492e-12	5.05492
				0.22736	2.23085e-12								-9.7704	-3.99545e-12	-3.99545				9.77112	6.26609e-12	6.26609
				0.229681	2.63898e-13								-9.76808	-5.19708e-12	-5.19708				9.7688	5.20632e-12	5.20632
				0.232	5.2139e-13								-9.76576	-4.26844e-12	-4.26844				9.76648	4.98339e-12	4.98339
				0.234319	6.51329e-13								-9.76344	1.8522e-13	0.18522				9.76416	5.22897e-12	5.22897
				0.23664	2.52768e-12								-9.76112	-2.2991e-12	-2.2991				9.76184	3.44917e-12	3.44917
				0.23896	2.5861e-12								-9.7588	-2.02254e-12	-2.02254				9.75952	5.3899e-12	5.3899
				0.24128	6.90668e-13								-9.75648	-9.03161e-13	-0.903161				9.7572	3.84375e-12	3.84375
				0.243598	-3.46453e-13								-9.75416	-2.16201e-12	-2.16201				9.75488	2.67073e-12	2.67073
				0.245919	1.57758e-12								-9.75184	-1.64703e-12	-1.64703				9.75256	3.74362e-12	3.74362
				0.24824	9.70809e-13								-9.74952	-1.76266e-12	-1.76266				9.75024	4.34801e-12	4.34801
				0.250559	5.27351e-13								-9.7472	-2.34082e-12	-2.34082				9.74792	4.76643e-12	4.76643
				0.25288	2.93061e-12								-9.74488	2.30956e-14	0.0230956				9.7456	4.46007e-12	4.46007
				0.255198	3.60295e-12								-9.74256	-8.4594e-13	-0.84594				9.74328	4.0774e-12	4.0774
				0.257519	1.27718e-12								-9.74024	-2.36467e-12	-2.36467				9.74096	3.91886e-12	3.91886
				0.259839	2.58133e-12								-9.73792	-3.04178e-12	-3.04178				9.73864	4.28483e-12	4.28483
				0.26216	1.40712e-12								-9.7356	-2.89992e-12	-2.89992				9.73632	3.83779e-12	3.83779
				0.26448	1.52871e-12								-9.73328	-4.00618e-12	-4.00618				9.734	4.15847e-12	4.15847
				0.2668	1.27837e-12								-9.73096	-1.12012e-12	-1.12012				9.73168	6.09085e-12	6.09085
				0.269119	1.71706e-12								-9.72864	-2.50056e-12	-2.50056				9.72936	3.98084e-12	3.98084
				0.27144	3.1285e-12								-9.72632	-2.89872e-12	-2.89872				9.72704	5.65931e-12	5.65931
				0.273761	2.11045e-12								-9.724	-1.27748e-12	-1.27748				9.72472	4.04164e-12	4.04164
				0.276079	2.14741e-12								-9.72168	-3.26188e-13	-0.326188				9.7224	3.12611e-12	3.12611
				0.2784	2.75656e-12								-9.71936	-1.50517e-12	-1.50517				9.72008	3.53619e-12	3.53619
				0.280719	1.62646e-12								-9.71704	-1.98796e-12	-1.98796				9.71776	2.87339e-12	2.87339
				0.28304	8.50408e-13								-9.71472	-2.21804e-12	-2.21804				9.71544	4.57808e-12	4.57808
				0.285358	-5.91588e-14								-9.7124	-3.77011e-14	-0.0377011				9.71312	2.94611e-12	2.94611
				0.287679	3.27751e-12								-9.71008	-3.28854e-12	-3.28854				9.7108	2.57775e-12	2.57775
				0.29	2.71603e-12								-9.70776	-3.91319e-12	-3.91319				9.70848	2.78637e-12	2.78637
				0.29232	2.82332e-12								-9.70544	-2.97383e-12	-2.97383				9.70616	3.82587e-12	3.82587
				0.294639	2.51338e-12								-9.70312	-1.68875e-12	-1.68875				9.70384	2.92942e-12	2.92942
				0.29696	1.49457e-13								-9.7008	-6.99313e-13	-0.699313				9.70152	5.11572e-12	5.11572
				0.29928	2.67431e-12								-9.69848	-2.93449e-12	-2.93449				9.6992	4.03568e-12	4.03568
				0.3016	3.42533e-12								-9.69616	-9.49652e-13	-0.949652				9.69688	4.17158e-12	4.17158
				0.303921	1.96144e-12								-9.69384	-2.57686e-12	-2.57686				9.69456	4.29913e-12	4.29913
				0.306239	1.47506e-12								-9.69152	-2.7509e-12	-2.7509				9.69224	4.56378e-12	4.56378
				0.30856	-1.81944e-13								-9.6892	-2.84985e-12	-2.84985				9.68992	3.6113e-12	3.6113
				0.310879	1.87604e-13								-9.68688	-2.85581e-12	-2.85581				9.6876	1.91495e-12	1.91495
				0.3132	3.02836e-12								-9.68456	-3.30284e-12	-3.30284				9.68528	2.92584e-12	2.92584
				0.315518	7.91996e-13								-9.68224	3.52113e-13	0.352113				9.68296	4.48391e-12	4.48391
				0.317841	2.54795e-12								-9.67992	-2.0285e-12	-2.0285				9.68064	4.40046e-12	4.40046
				0.320159	1.60858e-12								-9.6776	-2.23668e-13	-0.223668				9.67832	2.75776e-12	2.75776
				0.32248	1.31532e-12								-9.67528	-1.82346e-12	-1.82346				9.676	3.79607e-12	3.79607
				0.3248	2.78517e-12								-9.67296	-1.9069e-12	-1.9069				9.67368	2.39655e-12	2.39655
				0.32712	3.51354e-12								-9.67064	-3.26112e-12	-3.26112				9.67136	2.5098e-12	2.5098
				0.329438	9.44583e-13								-9.66832	-3.6569e-12	-3.6569				9.66904	6.01813e-12	6.01813
				0.331759	1.13293e-12								-9.666	-4.1385e-12	-4.1385				9.66672	4.09648e-12	4.09648
				0.33408	2.61471e-12								-9.66368	-3.3994e-12	-3.3994				9.6644	2.99021e-12	2.99021
				0.336399	1.17108e-12								-9.66136	-3.34934e-12	-3.34934				9.66208	3.99038e-12	3.99038
				0.33872	4.46483e-12								-9.65904	-3.40894e-12	-3.40894				9.65976	3.40029e-12	3.40029
				0.341039	2.79233e-12								-9.65672	-3.31e-12	-3.31				9.65744	3.27751e-12	3.27751
				0.34336	1.14128e-12								-9.6544	-1.45272e-12	-1.45272				9.65512	4.9226e-12	4.9226
				0.345678	8.34911e-13								-9.65208	-7.64878e-13	-0.764878				9.6528	5.11572e-12	5.11572
				0.348001	3.39314e-12								-9.64976	-4.69044e-12	-4.69044				9.65048	4.59716e-12	4.59716
				0.35032	9.55312e-13								-9.64744	-2.70918e-12	-2.70918				9.64816	4.85107e-12	4.85107
				0.35264	1.36344e-13								-9.64512	-2.13698e-12	-2.13698				9.64584	4.9369e-12	4.9369
				0.354959	3.54931e-12								-9.6428	-6.94544e-13	-0.694544				9.64352	5.31003e-12	5.31003
				0.35728	3.48016e-12								-9.64048	-1.47894e-12	-1.47894				9.6412	5.73799e-12	5.73799
				0.3596	1.44288e-12								-9.63816	-6.9216e-13	-0.69216				9.63888	4.77478e-12	4.77478
				0.361919	5.3808e-13								-9.63584	-3.42324e-12	-3.42324				9.63656	2.31549e-12	2.31549
				0.36424	1.33797e-12								-9.63352	-1.84015e-12	-1.84015				9.63424	3.04982e-12	3.04982
				0.366559	2.69815e-12								-9.6312	-3.26589e-12	-3.26589				9.63192	2.61709e-12	2.61709
				0.36888	3.00214e-12								-9.62888	-2.95833e-12	-2.95833				9.6296	2.19867e-12	2.19867
				0.371199	1.90303e-12								-9.62656	-1.40384e-12	-1.40384				9.62728	2.42993e-12	2.42993
				0.37352	3.55288e-12								-9.62424	-2.26572e-12	-2.26572				9.62496	2.92823e-12	2.92823
				0.375838	2.78875e-12								-9.62192	-3.89412e-12	-3.89412				9.62264	4.05237e-12	4.05237
				0.37816	1.82792e-12								-9.6196	-2.08333e-12	-2.08333				9.62032	3.76984e-12	3.76984
				0.380479	2.77206e-12								-9.61728	-1.77935e-12	-1.77935				9.618	4.86776e-12	4.86776
				0.3828	1.45361e-12								-9.61496	-2.23473e-12	-2.23473				9.61568	4.19065e-12	4.19065
				0.38512	4.16486e-13								-9.61264	-1.38477e-12	-1.38477				9.61336	1.96144e-12	1.96144
				0.38744	1.49652e-12								-9.61032	-4.66855e-13	-0.466855				9.61104	1.89707e-12	1.89707
				0.389758	1.54063e-12								-9.608	-2.40401e-12	-2.40401				9.60872	5.85243e-12	5.85243
				0.392079	3.91766e-12								-9.60568	-1.22979e-12	-1.22979				9.6064	6.89432e-12	6.89432
				0.3944	1.61812e-12								-9.60336	-6.23019e-13	-0.623019				9.60408	5.46977e-12	5.46977
				0.396719	-2.52278e-13								-9.60104	7.95572e-13	0.795572				9.60176	3.46705e-12	3.46705
				0.39904	-3.88176e-13								-9.59872	5.27351e-13	0.527351				9.59944	2.5861e-12	2.5861
				0.401359	1.89945e-12								-9.5964	-2.00704e-12	-2.00704				9.59712	3.12969e-12	3.12969
				0.40368	2.25827e-12								-9.59408	-1.63868e-12	-1.63868				9.5948	3.10227e-12	3.10227
				0.405998	2.87458e-12								-9.59176	-1.169e-12	-1.169				9.59248	6.70835e-12	6.70835
				0.40832	9.61273e-13								-9.58944	-4.44964e-12	-4.44964				9.59016	5.50553e-12	5.50553
				0.41064	4.95164e-13								-9.58712	-3.22178e-12	-3.22178				9.58784	4.20496e-12	4.20496
				0.41296	3.81916e-13								-9.5848	-2.09525e-12	-2.09525				9.58552	1.09598e-12	1.09598
				0.415279	-6.79047e-13								-9.58248	-2.12506e-12	-2.12506				9.5832	3.65898e-12	3.65898
				0.4176	-1.82703e-12								-9.58016	-3.44351e-12	-3.44351				9.58088	2.4347e-12	2.4347
				0.419919	4.28407e-13								-9.57784	-2.91899e-12	-2.91899				9.57856	4.33847e-12	4.33847
				0.422239	1.82912e-12								-9.57552	-2.4052e-12	-2.4052				9.57624	5.64858e-12	5.64858
				0.42456	1.05426e-12								-9.5732	-2.16678e-12	-2.16678				9.57392	4.53398e-12	4.53398
				0.426879	1.03518e-12								-9.57088	-3.98949e-12	-3.98949				9.5716	3.78772e-12	3.78772
				0.4292	1.3034e-12								-9.56856	-3.04535e-12	-3.04535				9.56928	3.39195e-12	3.39195
				0.431519	1.39758e-12								-9.56624	-2.04757e-12	-2.04757				9.56696	3.75435e-12	3.75435
				0.43384	4.11718e-13								-9.56392	-1.69352e-12	-1.69352				9.56464	3.19406e-12	3.19406
				0.436161	-2.45125e-13								-9.5616	-1.88544e-12	-1.88544				9.56232	3.58626e-12	3.58626
				0.43848	1.33917e-12								-9.55928	-2.85938e-12	-2.85938				9.56	4.23953e-12	4.23953
				0.440799	2.8865e-12								-9.55696	-3.12045e-12	-3.12045				9.55768	4.23118e-12	4.23118
				0.44312	1.45838e-12								-9.55464	-2.98217e-12	-2.98217				9.55536	2.67073e-12	2.67073
				0.44544	9.79154e-13								-9.55232	-3.25158e-12	-3.25158				9.55304	4.46722e-12	4.46722
				0.44776	6.66826e-13								-9.55	-2.38612e-12	-2.38612				9.55072	3.03909e-12	3.03909
				0.450078	-7.42228e-13								-9.54768	-1.07721e-12	-1.07721				9.5484	3.96773e-12	3.96773
				0.452399	1.64911e-12								-9.54536	-2.11433e-12	-2.11433				9.54608	3.16664e-12	3.16664
				0.45472	7.62193e-13								-9.54304	-1.79842e-12	-1.79842				9.54376	4.23357e-12	4.23357
				0.457039	1.33082e-12								-9.54072	-3.38152e-12	-3.38152				9.54144	5.24565e-12	5.24565
				0.45936	2.30834e-12								-9.5384	-2.20135e-12	-2.20135				9.53912	5.92038e-12	5.92038
				0.461679	4.84273e-12								-9.53608	-3.19794e-12	-3.19794				9.5368	6.1588e-12	6.1588
				0.464	2.22728e-12								-9.53376	-3.81783e-12	-3.81783				9.53448	6.12542e-12	6.12542
				0.466319	1.20327e-12								-9.53144	-3.66166e-12	-3.66166				9.53216	4.49583e-12	4.49583
				0.46864	1.5156e-12								-9.52912	-3.44113e-12	-3.44113				9.52984	4.17873e-12	4.17873
				0.47096	1.73852e-12								-9.5268	-2.85342e-12	-2.85342				9.52752	3.74839e-12	3.74839
				0.47328	2.37509e-12								-9.52448	-3.13833e-12	-3.13833				9.5252	3.38957e-12	3.38957
				0.475599	1.77905e-12								-9.52216	-4.88833e-12	-4.88833				9.52288	2.0735e-12	2.0735
				0.47792	1.29506e-12								-9.51984	-4.82157e-12	-4.82157				9.52056	2.48358e-12	2.48358
				0.480241	1.49295e-12								-9.51752	-5.33536e-12	-5.33536				9.51824	4.67464e-12	4.67464
				0.482559	9.36239e-13								-9.5152	-5.07072e-12	-5.07072				9.51592	6.05747e-12	6.05747
				0.48488	3.15115e-12								-9.51288	-3.72484e-12	-3.72484				9.5136	3.79607e-12	3.79607
				0.487199	1.0924e-12								-9.51056	-9.10313e-13	-0.910313				9.51128	4.37543e-12	4.37543
				0.48952	1.27599e-12								-9.50824	-2.48268e-12	-2.48268				9.50896	4.01303e-12	4.01303
				0.491838	8.71866e-13								-9.50592	-1.99154e-12	-1.99154				9.50664	4.31821e-12	4.31821
				0.494159	-4.72815e-13								-9.5036	-3.05727e-12	-3.05727				9.50432	3.55288e-12	3.55288
				0.49648	1.03995e-12								-9.50128	-3.89889e-12	-3.89889				9.502	5.31241e-12	5.31241
				0.4988	3.69995e-13								-9.49896	-1.79127e-12	-1.79127				9.49968	4.62815e-12	4.62815
				0.501119	-3.63142e-13								-9.49664	-3.19675e-12	-3.19675				9.49736	3.28109e-12	3.28109
				0.50344	1.36539e-12								-9.49432	-4.25771e-12	-4.25771				9.49504	3.81157e-12	3.81157
				0.50576	1.1377e-12								-9.492	-4.89667e-12	-4.89667				9.49272	2.30834e-12	2.30834
				0.50808	2.1033e-12								-9.48968	-2.42427e-12	-2.42427				9.4904	2.46808e-12	2.46808
				0.510401	1.50487e-12								-9.48736	-1.17571e-13	-0.117571				9.48808	4.01541e-12	4.01541
				0.512719	-8.35211e-13								-9.48504	-1.16423e-12	-1.16423				9.48576	3.80322e-12	3.80322
				0.51504	2.06157e-12								-9.48272	-2.60547e-12	-2.60547				9.48344	4.67822e-12	4.67822
				0.517359	1.08763e-12								-9.4804	-3.16456e-12	-3.16456				9.48112	3.0081e-12	3.0081
				0.51968	8.15837e-13								-9.47808	-2.67819e-12	-2.67819				9.4788	5.85124e-12	5.85124
				0.521998	4.46289e-13								-9.47576	-2.84389e-12	-2.84389				9.47648	6.85617e-12	6.85617
				0.524319	3.74958e-12								-9.47344	-3.38867e-12	-3.38867				9.47416	8.18178e-12	8.18178
				0.526639	4.30791e-13								-9.47112	-1.65537e-12	-1.65537				9.47184	6.20171e-12	6.20171
				0.52896	-6.57589e-13								-9.4688	-2.77117e-12	-2.77117				9.46952	4.2586e-12	4.2586
				0.53128	1.0626e-12								-9.46648	-3.19794e-12	-3.19794				9.4672	4.49702e-12	4.49702
				0.5336	2.5408e-12								-9.46416	-1.55524e-12	-1.55524				9.46488	3.41341e-12	3.41341
				0.535918	2.08184e-12								-9.46184	-1.17853e-12	-1.17853				9.46256	2.68504e-12	2.68504
				0.538239	1.65626e-12								-9.45952	-2.22042e-12	-2.22042				9.46024	2.96756e-12	2.96756
				0.54056	2.31072e-12								-9.4572	-2.58401e-12	-2.58401				9.45792	3.90693e-12	3.90693
				0.542879	1.25334e-12								-9.45488	-1.97962e-12	-1.97962				9.4556	4.47199e-12	4.47199
				0.5452	2.449e-12								-9.45256	-2.72825e-12	-2.72825				9.45328	3.52904e-12	3.52904
				0.547519	2.35288e-13								-9.45024	-4.09916e-12	-4.09916				9.45096	3.02359e-12	3.02359
				0.54984	5.02317e-13								-9.44792	-2.67223e-12	-2.67223				9.44864	4.40165e-12	4.40165
				0.552158	-2.46719e-12								-9.4456	-2.48864e-12	-2.48864				9.44632	3.54454e-12	3.54454
				0.554481	5.77419e-13								-9.44328	-2.72945e-12	-2.72945				9.444	3.33711e-12	3.33711
				0.5568	1.72421e-12								-9.44096	-3.31e-12	-3.31				9.44168	4.44934e-12	4.44934
				0.55912	7.37159e-13								-9.43864	-3.34934e-12	-3.34934				9.43936	3.91647e-12	3.91647
				0.561439	2.68385e-12								-9.43632	-3.56034e-12	-3.56034				9.43704	4.22045e-12	4.22045
				0.56376	1.63004e-12								-9.434	-3.10972e-12	-3.10972				9.43472	4.86299e-12	4.86299
				0.56608	1.04234e-12								-9.43168	-1.0629e-12	-1.0629				9.4324	2.96637e-12	2.96637
				0.568399	1.47506e-12								-9.42936	-2.28003e-12	-2.28003				9.43008	2.11403e-12	2.11403
				0.57072	-1.14754e-12								-9.42704	-3.84286e-12	-3.84286				9.42776	2.46212e-12	2.46212
				0.573039	-6.63113e-14								-9.42472	-4.47944e-12	-4.47944				9.42544	4.88207e-12	4.88207
				0.57536	5.88584e-14								-9.4224	-1.48252e-12	-1.48252				9.42312	1.45122e-12	1.45122
				0.577679	1.10909e-12								-9.42008	9.70054e-14	0.0970054				9.4208	2.38702e-12	2.38702
				0.58	1.14366e-12								-9.41776	-5.06194e-13	-0.506194				9.41848	4.00111e-12	4.00111
				0.582318	2.28926e-12								-9.41544	-3.29764e-13	-0.329764				9.41616	2.27496e-12	2.27496
				0.584641	1.40473e-12								-9.41312	-1.20714e-12	-1.20714				9.41384	9.06436e-13	0.906436
				0.586959	2.3894e-12								-9.4108	-9.60381e-13	-0.960381				9.41152	3.99038e-12	3.99038
				0.58928	6.1795e-13								-9.40848	-2.76759e-12	-2.76759				9.4092	5.33983e-12	5.33983
				0.5916	9.30278e-13								-9.40616	-3.06323e-12	-3.06323				9.40688	5.49361e-12	5.49361
				0.59392	3.02359e-12								-9.40384	-1.3502e-12	-1.3502				9.40456	4.80577e-12	4.80577
				0.596238	2.62067e-12								-9.40152	-1.5159e-12	-1.5159				9.40224	6.62848e-12	6.62848
				0.598559	1.82673e-12								-9.3992	-3.16694e-12	-3.16694				9.39992	4.14535e-12	4.14535
				0.60088	1.1675e-12								-9.39688	-3.70339e-12	-3.70339				9.3976	3.53977e-12	3.53977
				0.603199	-2.28436e-13								-9.39456	-3.20271e-12	-3.20271				9.39528	2.45973e-12	2.45973
				0.60552	1.10552e-12								-9.39224	-2.66388e-12	-2.66388				9.39296	3.15949e-12	3.15949
				0.607839	1.25616e-13								-9.38992	-2.28003e-12	-2.28003				9.39064	3.22029e-12	3.22029
				0.61016	6.13182e-13								-9.3876	-2.6007e-12	-2.6007				9.38832	4.13462e-12	4.13462
				0.612478	-1.18569e-12								-9.38528	-3.93584e-12	-3.93584				9.386	2.82094e-12	2.82094
				0.6148	1.53034e-13								-9.38296	-2.93806e-12	-2.93806				9.38368	4.81173e-12	4.81173
				0.61712	5.54769e-13								-9.38064	-2.25499e-12	-2.25499				9.38136	4.54232e-12	4.54232
				0.61944	-1.20953e-12								-9.37832	-1.24171e-12	-1.24171				9.37904	4.23118e-12	4.23118
				0.621759	9.92267e-13								-9.376	-1.53735e-12	-1.53735				9.37672	4.35158e-12	4.35158
				0.62408	1.69441e-12								-9.37368	-1.15469e-12	-1.15469				9.3744	4.71875e-12	4.71875
				0.6264	3.44083e-12								-9.37136	-1.20834e-12	-1.20834				9.37208	5.13121e-12	5.13121
				0.628719	1.96382e-12								-9.36904	-2.13936e-12	-2.13936				9.36976	3.20122e-12	3.20122
				0.63104	2.07588e-12								-9.36672	-3.27185e-12	-3.27185				9.36744	2.39894e-12	2.39894
				0.633359	-2.90425e-13								-9.3644	-3.91439e-12	-3.91439				9.36512	5.97522e-12	5.97522
				0.63568	1.60619e-12								-9.36208	-1.38953e-12	-1.38953				9.3628	4.48629e-12	4.48629
				0.637999	2.74627e-13								-9.35976	-1.94147e-12	-1.94147				9.36048	4.29317e-12	4.29317
				0.64032	6.62057e-13								-9.35744	-3.14906e-12	-3.14906				9.35816	4.09767e-12	4.09767
				0.642641	1.54897e-12								-9.35512	-1.98081e-12	-1.98081				9.35584	4.33609e-12	4.33609
				0.64496	3.42577e-13								-9.3528	-4.97535e-12	-4.97535				9.35352	3.2179e-12	3.2179
				0.647279	9.7677e-13								-9.35048	-5.13509e-12	-5.13509				9.3512	4.11317e-12	4.11317
				0.6496	1.73375e-12								-9.34816	-3.99664e-12	-3.99664				9.34888	5.16102e-12	5.16102
				0.65192	1.19373e-12								-9.34584	-5.90832e-13	-0.590832				9.34656	4.56855e-12	4.56855
				0.65424	2.41249e-13								-9.34352	-3.13714e-12	-3.13714				9.34424	3.9117e-12	3.9117
				0.656558	1.29387e-12								-9.3412	-4.59507e-12	-4.59507				9.34192	4.18588e-12	4.18588
				0.658879	3.10704e-12								-9.33888	-7.56533e-13	-0.756533				9.3396	4.08932e-12	4.08932
				0.6612	2.56702e-12								-9.33656	-3.57106e-12	-3.57106				9.33728	3.50878e-12	3.50878
				0.663519	2.57938e-13								-9.33424	-3.44232e-12	-3.44232				9.33496	4.70444e-12	4.70444
				0.66584	3.03237e-13								-9.33192	-1.41218e-12	-1.41218				9.33264	5.40539e-12	5.40539
				0.668159	-6.50437e-13								-9.3296	-2.65434e-12	-2.65434				9.33032	3.8664e-12	3.8664
				0.67048	2.01031e-12								-9.32728	-2.35871e-12	-2.35871				9.328	3.75315e-12	3.75315
				0.672799	3.03237e-13								-9.32496	-1.31443e-12	-1.31443				9.32568	4.58643e-12	4.58643
				0.67512	2.40609e-12								-9.32264	-1.72094e-12	-1.72094				9.32336	2.5396e-12	2.5396
				0.67744	3.31923e-12								-9.32032	-2.37063e-12	-2.37063				9.32104	3.8223e-12	3.8223
				0.67976	2.92346e-12								-9.318	-4.55693e-12	-4.55693				9.31872	3.24771e-12	3.24771
				0.682079	2.16215e-13								-9.31568	-1.9224e-12	-1.9224				9.3164	3.16784e-12	3.16784
				0.6844	2.96637e-12								-9.31336	-1.4098e-12	-1.4098				9.31408	2.29403e-12	2.29403
				0.686719	3.39e-13								-9.31104	1.96621e-12	1.96621				9.31176	9.73194e-13	0.973194
				0.689039	6.9186e-13								-9.30872	9.38623e-13	0.938623				9.30944	3.12254e-12	3.12254
				0.69136	4.35397e-12								-9.3064	-1.22741e-12	-1.22741				9.30712	5.10976e-12	5.10976
				0.693679	2.0735e-12								-9.30408	-7.61301e-13	-0.761301				9.3048	3.61964e-12	3.61964
				0.696	8.09877e-13								-9.30176	-1.5147e-12	-1.5147				9.30248	5.3446e-12	5.3446
				0.698318	2.76968e-12								-9.29944	-4.6058e-12	-4.6058				9.30016	3.98919e-12	3.98919
				0.700639	2.25589e-12								-9.29712	-2.98455e-12	-2.98455				9.29784	2.62782e-12	2.62782
				0.70296	3.05101e-12								-9.2948	-1.73286e-12	-1.73286				9.29552	2.35721e-12	2.35721
				0.70528	2.55272e-12								-9.29248	-1.4706e-12	-1.4706				9.2932	2.98783e-12	2.98783
				0.707599	1.09956e-12								-9.29016	-2.54586e-12	-2.54586				9.29088	1.6801e-12	1.6801
				0.70992	1.94117e-12								-9.28784	-3.62709e-12	-3.62709				9.28856	1.80289e-12	1.80289
				0.71224	2.43947e-12								-9.28552	-4.52474e-12	-4.52474				9.28624	2.9926e-12	2.9926
				0.71456	3.1635e-13								-9.2832	-2.00585e-12	-2.00585				9.28392	2.85193e-12	2.85193
				0.716881	5.42848e-13								-9.28088	-1.1535e-12	-1.1535				9.2816	3.5648e-12	3.5648
				0.719199	8.82595e-13								-9.27856	-2.3301e-12	-2.3301				9.27928	3.23102e-12	3.23102
				0.72152	1.71825e-12								-9.27624	-2.90826e-12	-2.90826				9.27696	3.8819e-12	3.8819
				0.723839	1.8923e-12								-9.27392	-1.24171e-12	-1.24171				9.27464	3.65659e-12	3.65659
				0.72616	9.92267e-13								-9.2716	-2.08214e-12	-2.08214				9.27232	2.08065e-12	2.08065
				0.728478	-6.86955e-14								-9.26928	-2.57805e-12	-2.57805				9.27	2.48e-12	2.48
				0.730799	-3.11882e-13								-9.26696	-2.89872e-12	-2.89872				9.26768	6.33761e-12	6.33761
				0.733119	1.13695e-13								-9.26464	-3.05727e-12	-3.05727				9.26536	4.58881e-12	4.58881
				0.73544	1.29744e-12								-9.26232	-1.97604e-12	-1.97604				9.26304	3.87832e-12	3.87832
				0.73776	-2.34396e-13								-9.26	-1.29655e-12	-1.29655				9.26072	3.1285e-12	3.1285
				0.74008	1.20847e-13								-9.25768	-1.98916e-12	-1.98916				9.2584	9.49352e-13	0.949352
				0.742399	2.52411e-12								-9.25536	-3.21105e-12	-3.21105				9.25608	2.88531e-12	2.88531
				0.74472	5.85763e-13								-9.25304	-1.66729e-12	-1.66729				9.25376	5.50195e-12	5.50195
				0.747041	1.77309e-12								-9.25072	-1.68637e-12	-1.68637				9.25144	5.81071e-12	5.81071
				0.749359	2.33337e-12								-9.2484	-2.76879e-12	-2.76879				9.24912	5.48527e-12	5.48527
				0.75168	-6.86955e-14								-9.24608	-2.51845e-12	-2.51845				9.2468	4.64603e-12	4.64603
				0.753999	2.42755e-12								-9.24376	-2.33248e-12	-2.33248				9.24448	3.02598e-12	3.02598
				0.75632	1.0173e-12								-9.24144	-2.31102e-12	-2.31102				9.24216	4.22403e-12	4.22403
				0.758638	2.82809e-12								-9.23912	-1.32039e-12	-1.32039				9.23984	3.29181e-12	3.29181
				0.760961	3.48851e-12								-9.2368	2.57938e-13	0.257938				9.23752	2.95088e-12	2.95088
				0.76328	3.79369e-12								-9.23448	-7.95872e-13	-0.795872				9.2352	2.99021e-12	2.99021
				0.7656	1.03041e-12								-9.23216	-1.59219e-12	-1.59219				9.23288	2.36079e-12	2.36079
				0.767919	6.07221e-13								-9.22984	-2.54467e-12	-2.54467				9.23056	2.65762e-12	2.65762
				0.77024	2.14025e-12								-9.22752	-2.34321e-12	-2.34321				9.22824	2.51695e-12	2.51695
				0.77256	2.37986e-12								-9.2252	-6.71895e-13	-0.671895				9.22592	2.19867e-12	2.19867
				0.774879	1.16035e-12								-9.22288	-1.70902e-12	-1.70902				9.2236	4.39688e-12	4.39688
				0.7772	9.79154e-13								-9.22056	-1.74835e-12	-1.74835				9.22128	3.87952e-12	3.87952
				0.779519	-2.40357e-13								-9.21824	1.70633e-12	1.70633				9.21896	4.30629e-12	4.30629
				0.78184	8.62329e-13								-9.21592	-3.90561e-13	-0.390561				9.21664	4.07502e-12	4.07502
				0.784159	2.42397e-12								-9.2136	-7.54149e-13	-0.754149				9.21432	2.60278e-12	2.60278
				0.78648	1.88991e-12								-9.21128	-2.31102e-12	-2.31102				9.212	4.07264e-12	4.07264
				0.788798	3.85492e-13								-9.20896	-1.6065e-12	-1.6065				9.20968	3.95462e-12	3.95462
				0.791121	1.1377e-12								-9.20664	5.65498e-13	0.565498				9.20736	2.91869e-12	2.91869
				0.793439	1.75759e-12								-9.20432	-1.35496e-12	-1.35496				9.20504	3.4146e-12	3.4146
				0.79576	2.56583e-12								-9.202	-3.50312e-12	-3.50312				9.20272	2.43589e-12	2.43589
				0.79808	1.79455e-12								-9.19968	-2.67699e-12	-2.67699				9.2004	4.72471e-12	4.72471
				0.8004	3.48016e-12								-9.19736	-2.55063e-12	-2.55063				9.19808	4.58404e-12	4.58404
				0.802718	1.3499e-12								-9.19504	-3.09304e-12	-3.09304				9.19576	4.84511e-12	4.84511
				0.805039	1.55255e-12								-9.19272	-4.36261e-12	-4.36261				9.19344	2.35006e-12	2.35006
				0.80736	9.32662e-13								-9.1904	-2.44096e-12	-2.44096				9.19112	2.71842e-12	2.71842
				0.809679	1.3487e-12								-9.18808	-6.39708e-13	-0.639708				9.1888	3.63394e-12	3.63394
				0.812	2.238e-12								-9.18576	-1.48371e-12	-1.48371				9.18648	5.62474e-12	5.62474
				0.814319	1.82912e-12								-9.18344	-7.73222e-13	-0.773222				9.18416	3.03432e-12	3.03432
				0.81664	-9.2581e-13								-9.18112	-1.06767e-12	-1.06767				9.18184	4.06906e-12	4.06906
				0.818958	-9.84978e-14								-9.1788	-3.37914e-12	-3.37914				9.17952	3.5195e-12	3.5195
				0.82128	2.40371e-12								-9.17648	-2.06784e-12	-2.06784				9.1772	3.62798e-12	3.62798
				0.8236	2.24277e-12								-9.17416	-3.96565e-12	-3.96565				9.17488	3.85567e-12	3.85567
				0.82592	2.58848e-12								-9.17184	-2.32012e-13	-0.232012				9.17256	3.69117e-12	3.69117
				0.828239	6.84707e-13								-9.16952	-1.19403e-12	-1.19403				9.17024	3.20837e-12	3.20837
				0.83056	2.64093e-12								-9.1672	-1.00926e-12	-1.00926				9.16792	5.48884e-12	5.48884
				0.83288	2.37152e-12								-9.16488	-2.04757e-12	-2.04757				9.1656	5.06684e-12	5.06684
				0.835199	2.41205e-12								-9.16256	-1.27033e-12	-1.27033				9.16328	4.23118e-12	4.23118
				0.83752	4.5821e-13								-9.16024	-4.0634e-12	-4.0634				9.16096	2.45854e-12	2.45854
				0.839839	1.46553e-12								-9.15792	-2.92018e-12	-2.92018				9.15864	4.04164e-12	4.04164
				0.84216	1.45599e-12								-9.1556	-2.17155e-12	-2.17155				9.15632	5.38394e-12	5.38394
				0.844479	-4.3225e-15								-9.15328	-1.51113e-12	-1.51113				9.154	6.52477e-12	6.52477
				0.8468	3.39672e-12								-9.15096	-1.47775e-12	-1.47775				9.15168	4.66511e-12	4.66511
				0.849118	3.42414e-12								-9.14864	-1.62795e-12	-1.62795				9.14936	3.91647e-12	3.91647
				0.85144	1.55851e-12								-9.14632	-4.32327e-12	-4.32327				9.14704	2.73749e-12	2.73749
				0.853759	5.67882e-13								-9.144	-1.92002e-12	-1.92002				9.14472	4.74736e-12	4.74736
				0.85608	3.49729e-13								-9.14168	-1.22383e-12	-1.22383				9.1424	4.41119e-12	4.41119
				0.8584	1.1377e-12								-9.13936	-7.42228e-13	-0.742228				9.14008	1.72183e-12	1.72183
				0.86072	1.52513e-12								-9.13704	-1.72213e-12	-1.72213				9.13776	3.16784e-12	3.16784
				0.863038	-4.25131e-13								-9.13472	-3.48166e-12	-3.48166				9.13544	2.10211e-12	2.10211
				0.865359	3.63394e-12								-9.1324	-1.87829e-12	-1.87829				9.13312	3.32877e-12	3.32877
				0.86768	2.03654e-12								-9.13008	-8.96008e-13	-0.896008				9.1308	3.17737e-12	3.17737
				0.869999	1.07214e-12								-9.12776	-2.41116e-12	-2.41116				9.12848	3.92362e-12	3.92362
				0.87232	-1.4706e-12								-9.12544	-6.98876e-14	-0.0698876				9.12616	4.7104e-12	4.7104
				0.874639	5.54769e-13								-9.12312	8.03161e-14	0.0803161				9.12384	3.17857e-12	3.17857
				0.87696	2.39894e-12								-9.1208	-3.10376e-12	-3.10376				9.12152	3.67924e-12	3.67924
				0.879279	2.58967e-12								-9.11848	-4.50165e-13	-0.450165				9.1192	4.67464e-12	4.67464
				0.8816	1.61096e-12								-9.11616	-1.07125e-12	-1.07125				9.11688	2.86147e-12	2.86147
				0.88392	1.8923e-12								-9.11384	-1.47894e-12	-1.47894				9.11456	2.6004e-12	2.6004
				0.88624	-1.73882e-12								-9.11152	-2.1489e-12	-2.1489				9.11224	2.19151e-12	2.19151
				0.888559	4.66554e-13								-9.1092	-1.38119e-12	-1.38119				9.10992	1.31532e-12	1.31532
				0.89088	6.406e-13								-9.10688	-2.79978e-12	-2.79978				9.1076	2.92227e-12	2.92227
				0.893199	2.48477e-12								-9.10456	-3.1741e-12	-3.1741				9.10528	2.01747e-12	2.01747
				0.895519	1.89587e-12								-9.10224	-4.6213e-12	-4.6213				9.10296	1.06737e-12	1.06737
				0.89784	3.60772e-12								-9.09992	-3.07039e-12	-3.07039				9.10064	2.69815e-12	2.69815
				0.900159	2.30834e-12								-9.0976	-1.51828e-12	-1.51828				9.09832	4.90829e-12	4.90829
				0.90248	-2.81644e-14								-9.09528	-1.43722e-12	-1.43722				9.096	4.11197e-12	4.11197
				0.904799	1.33321e-12								-9.09296	-2.27764e-12	-2.27764				9.09368	5.13121e-12	5.13121
				0.90712	1.63719e-12								-9.09064	-3.92273e-12	-3.92273				9.09136	3.18572e-12	3.18572
				0.909441	1.82673e-12								-9.08832	-2.23115e-12	-2.23115				9.08904	3.04624e-12	3.04624
				0.91176	1.98051e-12								-9.086	-1.35496e-12	-1.35496				9.08672	2.39536e-12	2.39536
				0.914079	8.68289e-13								-9.08368	-3.07277e-12	-3.07277				9.0844	1.93879e-12	1.93879
				0.9164	-3.32148e-13								-9.08136	-3.43636e-12	-3.43636				9.08208	3.23221e-12	3.23221
				0.91872	1.10194e-12								-9.07904	-2.43619e-12	-2.43619				9.07976	4.35516e-12	4.35516
				0.92104	2.41324e-12								-9.07672	-2.12506e-12	-2.12506				9.07744	2.95564e-12	2.95564
				0.923361	1.31056e-12								-9.0744	-3.1586e-12	-3.1586				9.07512	3.92005e-12	3.92005
				0.925679	6.41792e-13								-9.07208	-2.77236e-12	-2.77236				9.0728	4.45649e-12	4.45649
				0.928	4.03373e-13								-9.06976	-2.55854e-13	-0.255854				9.07048	4.44576e-12	4.44576
				0.930319	2.30595e-12								-9.06744	-1.1237e-12	-1.1237				9.06816	2.36556e-12	2.36556
				0.93264	3.08677e-12								-9.06512	-1.68831e-13	-0.168831				9.06584	3.09035e-12	3.09035
				0.934958	2.67908e-12								-9.0628	-7.67262e-13	-0.767262				9.06352	3.45394e-12	3.45394
				0.937279	1.03161e-12								-9.06048	-1.32874e-12	-1.32874				9.0612	2.94015e-12	2.94015
				0.939599	1.92568e-12								-9.05816	-2.1942e-12	-2.1942				9.05888	3.00452e-12	3.00452
				0.94192	3.54931e-12								-9.05584	-2.7664e-12	-2.7664				9.05656	3.73885e-12	3.73885
				0.94424	2.74107e-12								-9.05352	-2.30029e-12	-2.30029				9.05424	4.0178e-12	4.0178
				0.94656	1.39162e-12								-9.0512	-3.04297e-12	-3.04297				9.05192	6.92651e-12	6.92651
				0.948879	2.26542e-12								-9.04888	-2.71514e-12	-2.71514				9.0496	6.23986e-12	6.23986
				0.9512	1.81839e-12								-9.04656	-1.59338e-12	-1.59338				9.04728	3.66613e-12	3.66613
				0.953521	7.03781e-13								-9.04424	-1.09032e-12	-1.09032				9.04496	3.58626e-12	3.58626
				0.955839	1.67339e-13								-9.04192	-5.18115e-13	-0.518115				9.04264	3.9272e-12	3.9272
				0.95816	8.01532e-13								-9.0396	-2.14131e-13	-0.214131				9.04032	5.16221e-12	5.16221
				0.960479	8.43256e-13								-9.03728	-1.26794e-12	-1.26794				9.038	5.07638e-12	5.07638
				0.9628	3.79845e-12								-9.03496	-2.21685e-12	-2.21685				9.03568	3.37526e-12	3.37526
				0.965118	3.01167e-12								-9.03264	-1.77176e-13	-0.177176				9.03336	3.56361e-12	3.56361
				0.967439	5.1543e-13								-9.03032	-1.73643e-12	-1.73643				9.03104	5.25042e-12	5.25042
				0.96976	-2.86849e-13								-9.028	-1.44675e-12	-1.44675				9.02872	4.91068e-12	4.91068
				0.97208	1.91614e-12								-9.02568	-3.45066e-12	-3.45066				9.0264	3.39553e-12	3.39553
				0.974399	1.98766e-12								-9.02336	-2.64242e-12	-2.64242				9.02408	2.16886e-12	2.16886
				0.97672	2.84836e-12								-9.02104	-1.87472e-12	-1.87472				9.02176	1.92329e-12	1.92329
				0.97904	2.12118e-12								-9.01872	-2.94164e-12	-2.94164				9.01944	6.08966e-12	6.08966
				0.981359	1.79693e-12								-9.0164	-2.36228e-12	-2.36228				9.01712	3.8974e-12	3.8974
				0.98368	2.09853e-12								-9.01408	-3.28496e-12	-3.28496				9.0148	6.66782e-12	6.66782
				0.985999	1.7564e-12								-9.01176	-5.49109e-13	-0.549109				9.01248	4.37423e-12	4.37423
				0.98832	1.06498e-12								-9.00944	-1.67206e-12	-1.67206				9.01016	4.02138e-12	4.02138
				0.990639	1.64792e-12								-9.00712	-7.61301e-13	-0.761301				9.00784	3.45513e-12	3.45513
				0.99296	2.10449e-12								-9.0048	1.28e-13	0.128				9.00552	2.14025e-12	2.14025
				0.995278	-6.90968e-13								-9.00248	-2.1036e-12	-2.1036				9.0032	3.19168e-12	3.19168
				0.997601	1.40116e-12								-9.00016	-4.5462e-12	-4.5462				9.00088	4.43622e-12	4.43622
				0.999919	2.63497e-12								-8.99784	-3.75063e-13	-0.375063				8.99856	5.3446e-12	5.3446
				1.00224	2.18674e-12								-8.99552	-2.24188e-12	-2.24188				8.99624	5.19678e-12	5.19678
				1.00456	1.34155e-12								-8.9932	-1.96055e-12	-1.96055				8.99392	4.31701e-12	4.31701
				1.00688	1.5609e-12								-8.99088	8.27003e-14	0.0827003				8.9916	4.98101e-12	4.98101
				1.0092	-3.36916e-13								-8.98856	-2.32533e-12	-2.32533				8.98928	4.36231e-12	4.36231
				1.01152	3.02359e-12								-8.98624	-4.68047e-13	-0.468047				8.98696	2.78517e-12	2.78517
				1.01384	4.33013e-12								-8.98392	4.03373e-13	0.403373				8.98464	3.90813e-12	3.90813
				1.01616	6.83515e-13								-8.9816	-2.60905e-12	-2.60905				8.98232	3.14996e-12	3.14996
				1.01848	2.74822e-12								-8.97928	-2.61262e-12	-2.61262				8.98	3.80561e-12	3.80561
				1.0208	3.61249e-12								-8.97696	-1.14873e-12	-1.14873				8.97768	2.98187e-12	2.98187
				1.02312	1.183e-12								-8.97464	-2.63289e-12	-2.63289				8.97536	2.60159e-12	2.60159
				1.02544	1.74567e-12								-8.97232	-5.07386e-13	-0.507386				8.97304	4.09409e-12	4.09409
				1.02776	-1.5691e-13								-8.97	-1.31324e-12	-1.31324				8.97072	4.28602e-12	4.28602
				1.03008	5.54769e-13								-8.96768	-2.77355e-12	-2.77355				8.9684	4.63053e-12	4.63053
				1.0324	-3.14267e-13								-8.96536	-1.35453e-13	-0.135453				8.96608	2.76491e-12	2.76491
				1.03472	2.60517e-12								-8.96304	-9.01968e-13	-0.901968				8.96376	6.03363e-12	6.03363
				1.03704	2.28211e-12								-8.96072	3.40192e-13	0.340192				8.96144	4.47199e-12	4.47199
				1.03936	3.09989e-12								-8.9584	-1.50398e-12	-1.50398				8.95912	5.12168e-12	5.12168
				1.04168	2.26542e-12								-8.95608	-1.60173e-12	-1.60173				8.9568	4.11793e-12	4.11793
				1.044	2.67073e-12								-8.95376	-9.79454e-13	-0.979454				8.95448	5.05254e-12	5.05254
				1.04632	2.85432e-12								-8.95144	-3.83929e-12	-3.83929				8.95216	3.87117e-12	3.87117
				1.04864	6.88283e-13								-8.94912	-1.43483e-12	-1.43483				8.94984	5.17771e-12	5.17771
				1.05096	4.37944e-13								-8.9468	-7.45804e-13	-0.745804				8.94752	5.8572e-12	5.8572
				1.05328	3.78339e-13								-8.94448	-3.42563e-12	-3.42563				8.9452	4.54232e-12	4.54232
				1.0556	2.33814e-12								-8.94216	-2.74018e-12	-2.74018				8.94288	2.70888e-12	2.70888
				1.05792	-8.07793e-13								-8.93984	-1.90571e-12	-1.90571				8.94056	3.09989e-12	3.09989
				1.06024	1.38804e-12								-8.93752	-9.05545e-13	-0.905545				8.93824	3.64348e-12	3.64348
				1.06256	6.9782e-13								-8.9352	-3.77011e-14	-0.0377011				8.93592	2.90319e-12	2.90319
				1.06488	2.0127e-12								-8.93288	3.09198e-13	0.309198				8.9336	4.94048e-12	4.94048
				1.0672	2.20939e-12								-8.93056	-1.32874e-12	-1.32874				8.93128	2.31787e-12	2.31787
				1.06952	6.33447e-13								-8.92824	-1.71617e-12	-1.71617				8.92896	2.5396e-12	2.5396
				1.07184	2.73749e-12								-8.92592	-2.63766e-12	-2.63766				8.92664	3.2334e-12	3.2334
				1.07416	1.96621e-12								-8.9236	-1.4551e-12	-1.4551				8.92432	2.66283e-13	0.266283
				1.07648	2.39655e-12								-8.92128	-2.63527e-12	-2.63527				8.922	2.09018e-12	2.09018
				1.0788	2.16767e-12								-8.91896	-1.37404e-12	-1.37404				8.91968	5.59537e-13	0.559537
				1.08112	2.78517e-12								-8.91664	-1.56954e-12	-1.56954				8.91736	4.09886e-12	4.09886
				1.08344	-1.15112e-12								-8.91432	-2.00704e-12	-2.00704				8.91504	4.64365e-12	4.64365
				1.08576	3.26324e-14								-8.912	-1.41814e-12	-1.41814				8.91272	2.10807e-12	2.10807
				1.08808	3.1583e-12								-8.90968	-1.57312e-12	-1.57312				8.9104	2.24396e-12	2.24396
				1.0904	4.95164e-13								-8.90736	-2.2848e-12	-2.2848				8.90808	2.41205e-12	2.41205
				1.09272	2.64332e-12								-8.90504	-1.24768e-12	-1.24768				8.90576	2.00674e-12	2.00674
				1.09504	2.5098e-12								-8.90272	-1.23814e-12	-1.23814				8.90344	3.41937e-12	3.41937
				1.09736	4.31701e-12								-8.9004	-9.85415e-13	-0.985415				8.90112	3.45632e-12	3.45632
				1.09968	4.59477e-12								-8.89808	-7.29115e-13	-0.729115				8.8988	3.25128e-12	3.25128
				1.102	2.60398e-12								-8.89576	1.22039e-13	0.122039				8.89648	3.76984e-12	3.76984
				1.10432	4.22165e-12								-8.89344	-1.43364e-12	-1.43364				8.89416	3.92839e-12	3.92839
				1.10664	1.44407e-12								-8.89112	-4.03674e-13	-0.403674				8.89184	1.37851e-12	1.37851
				1.10896	2.03416e-12								-8.8888	-1.13443e-12	-1.13443				8.88952	2.10091e-12	2.10091
				1.11128	1.36778e-12								-8.88648	-1.21668e-12	-1.21668				8.8872	4.53517e-12	4.53517
				1.1136	2.49192e-12								-8.88416	-1.96055e-12	-1.96055				8.88488	5.07995e-12	5.07995
				1.11592	1.60262e-12								-8.88184	-5.65798e-13	-0.565798				8.88256	4.08217e-12	4.08217
				1.11824	2.69934e-12								-8.87952	-1.66968e-12	-1.66968				8.88024	3.33592e-12	3.33592
				1.12056	5.20198e-13								-8.8772	-1.33708e-12	-1.33708				8.87792	2.87816e-12	2.87816
				1.12288	7.59843e-15								-8.87488	-2.39804e-12	-2.39804				8.8756	3.19168e-12	3.19168
				1.1252	2.94849e-12								-8.87256	-2.59474e-12	-2.59474				8.87328	3.4754e-12	3.4754
				1.12752	2.83167e-12								-8.87024	-3.18244e-12	-3.18244				8.87096	3.74362e-12	3.74362
				1.12984	2.05323e-12								-8.86792	-2.4493e-12	-2.4493				8.86864	2.13429e-12	2.13429
				1.13216	1.19135e-12								-8.8656	-1.32159e-12	-1.32159				8.86632	2.24039e-12	2.24039
				1.13448	9.37431e-13								-8.86328	-1.0784e-12	-1.0784				8.864	2.37271e-12	2.37271
				1.1368	1.77905e-12								-8.86096	-1.61484e-12	-1.61484				8.86168	4.51133e-12	4.51133
				1.13912	-2.8208e-13								-8.85864	-2.52202e-12	-2.52202				8.85936	4.03449e-12	4.03449
				1.14144	9.12397e-13								-8.85632	-3.59133e-12	-3.59133				8.85704	3.89978e-12	3.89978
				1.14376	1.23668e-14								-8.854	-1.89617e-12	-1.89617				8.85472	2.88889e-12	2.88889
				1.14608	1.30221e-12								-8.85168	-2.32175e-12	-2.32175				8.8524	2.77564e-12	2.77564
				1.1484	1.48265e-13								-8.84936	-4.34668e-13	-0.434668				8.85008	2.2845e-12	2.2845
				1.15072	1.26645e-12								-8.84704	-1.73882e-12	-1.73882				8.84776	4.41e-12	4.41
				1.15304	3.73571e-13								-8.84472	-2.17036e-12	-2.17036				8.84544	3.04267e-12	3.04267
				1.15536	-6.1825e-13								-8.8424	-1.70782e-12	-1.70782				8.84312	2.19151e-12	2.19151
				1.15768	2.03535e-12								-8.84008	-3.10019e-12	-3.10019				8.8408	3.95223e-12	3.95223
				1.16	2.6004e-12								-8.83776	-2.06426e-12	-2.06426				8.83848	3.51593e-12	3.51593
				1.16232	1.69918e-12								-8.83544	-1.29059e-12	-1.29059				8.83616	1.91256e-12	1.91256
				1.16464	1.60023e-12								-8.83312	-1.86637e-12	-1.86637				8.83384	2.70411e-12	2.70411
				1.16696	1.7564e-12								-8.8308	-1.34185e-12	-1.34185				8.83152	4.12032e-12	4.12032
				1.16928	1.74448e-12								-8.82848	-7.89912e-13	-0.789912				8.8292	4.46126e-12	4.46126
				1.1716	1.34393e-12								-8.82616	-1.70023e-13	-0.170023				8.82688	2.94968e-12	2.94968
				1.17392	1.37493e-12								-8.82384	1.46314e-12	1.46314				8.82456	2.34768e-12	2.34768
				1.17624	1.62169e-12								-8.82152	-2.30149e-12	-2.30149				8.82224	3.68044e-12	3.68044
				1.17856	2.20343e-12								-8.8192	-1.60888e-12	-1.60888				8.81992	4.39331e-12	4.39331
				1.18088	1.85534e-12								-8.81688	-2.20612e-12	-2.20612				8.8176	3.46348e-12	3.46348
				1.1832	3.58149e-12								-8.81456	-1.68637e-12	-1.68637				8.81528	3.72693e-12	3.72693
				1.18552	1.70752e-12								-8.81224	-1.58265e-12	-1.58265				8.81296	2.78279e-12	2.78279
				1.18784	9.86307e-13								-8.80992	1.15797e-12	1.15797				8.81064	4.25383e-12	4.25383
				1.19016	7.35967e-13								-8.8076	-2.16082e-12	-2.16082				8.80832	4.50536e-12	4.50536
				1.19248	2.41682e-12								-8.80528	-5.69375e-13	-0.569375				8.806	5.26354e-12	5.26354
				1.1948	1.44526e-12								-8.80296	-2.70322e-12	-2.70322				8.80368	3.46944e-12	3.46944
				1.19712	1.21876e-12								-8.80064	-5.55825e-14	-0.0555825				8.80136	2.7959e-12	2.7959
				1.19944	1.89989e-13								-8.79832	-1.67325e-12	-1.67325				8.79904	3.7758e-12	3.7758
				1.20176	-1.55881e-12								-8.796	-1.60487e-13	-0.160487				8.79672	3.78772e-12	3.78772
				1.20408	5.27351e-13								-8.79368	-1.51351e-12	-1.51351				8.7944	4.32297e-12	4.32297
				1.2064	1.15201e-12								-8.79136	-1.19956e-13	-0.119956				8.79208	1.3499e-12	1.3499
				1.20872	2.71051e-13								-8.78904	-2.01018e-13	-0.201018				8.78976	1.44288e-12	1.44288
				1.21104	1.38923e-12								-8.78672	-1.40861e-12	-1.40861				8.78744	2.39059e-12	2.39059
				1.21336	6.27487e-13								-8.7844	-2.03684e-12	-2.03684				8.78512	2.33099e-12	2.33099
				1.21568	9.70054e-14								-8.78208	-2.0738e-12	-2.0738				8.7828	1.91495e-12	1.91495
				1.218	1.91733e-12								-8.77976	-3.08946e-12	-3.08946				8.78048	3.36215e-12	3.36215
				1.22032	2.36794e-12								-8.77744	-2.74614e-12	-2.74614				8.77816	2.29284e-12	2.29284
				1.22264	1.94833e-12								-8.77512	-9.1985e-13	-0.91985				8.77584	3.33592e-12	3.33592
				1.22496	2.58013e-12								-8.7728	-3.41248e-14	-0.0341248				8.77352	1.54421e-12	1.54421
				1.22728	1.75997e-12								-8.77048	-4.65662e-13	-0.465662				8.7712	4.18708e-12	4.18708
				1.2296	3.63633e-12								-8.76816	-1.31086e-12	-1.31086				8.76888	3.09989e-12	3.09989
				1.23192	2.97472e-12								-8.76584	-6.81431e-13	-0.681431				8.76656	3.84375e-12	3.84375
				1.23424	1.62169e-12								-8.76352	-7.54149e-13	-0.754149				8.76424	5.12883e-12	5.12883
				1.23656	4.10244e-12								-8.7612	-1.67683e-12	-1.67683				8.76192	6.2184e-12	6.2184
				1.23888	2.24158e-12								-8.75888	3.37808e-13	0.337808				8.7596	5.76183e-12	5.76183
				1.2412	2.39417e-12								-8.75656	-7.68454e-13	-0.768454				8.75728	3.06174e-12	3.06174
				1.24352	3.07485e-12								-8.75424	-3.63305e-12	-3.63305				8.75496	4.08813e-12	4.08813
				1.24584	3.45394e-12								-8.75192	-2.98575e-12	-2.98575				8.75264	4.59596e-12	4.59596
				1.24816	1.55732e-12								-8.7496	-1.2894e-12	-1.2894				8.75032	3.30374e-12	3.30374
				1.25048	1.09598e-12								-8.74728	-5.72951e-13	-0.572951				8.748	2.14621e-12	2.14621
				1.2528	2.50146e-12								-8.74496	-1.84968e-12	-1.84968				8.74568	1.59189e-12	1.59189
				1.25512	1.62169e-12								-8.74264	-2.24546e-12	-2.24546				8.74336	2.88293e-12	2.88293
				1.25744	1.847e-12								-8.74032	-9.69918e-13	-0.969918				8.74104	2.83643e-12	2.83643
				1.25976	1.11148e-12								-8.738	-1.70023e-13	-0.170023				8.73872	2.67312e-12	2.67312
				1.26208	2.23324e-12								-8.73568	-4.69239e-13	-0.469239				8.7364	2.60278e-12	2.60278
				1.2644	3.83183e-12								-8.73336	-1.03667e-12	-1.03667				8.73408	3.04147e-12	3.04147
				1.26672	3.37526e-12								-8.73104	-3.21344e-12	-3.21344				8.73176	3.15115e-12	3.15115
				1.26904	4.22447e-13								-8.72872	-1.56239e-12	-1.56239				8.72944	3.35619e-12	3.35619
				1.27136	1.07929e-12								-8.7264	-3.45261e-13	-0.345261				8.72712	3.8223e-12	3.8223
				1.27368	2.04489e-12								-8.72408	-6.74279e-13	-0.674279				8.7248	4.3945e-12	4.3945
				1.276	2.61232e-12								-8.72176	-9.52036e-13	-0.952036				8.72248	4.66391e-12	4.66391
				1.27832	2.64928e-12								-8.71944	-4.15595e-13	-0.415595				8.72016	1.94475e-12	1.94475
				1.28064	3.70189e-12								-8.71712	-1.00882e-13	-0.100882				8.71784	1.53467e-12	1.53467
				1.28296	2.51099e-12								-8.7148	-1.33589e-12	-1.33589				8.71552	2.83763e-12	2.83763
				1.28528	2.82213e-12								-8.71248	-7.02889e-13	-0.702889				8.7132	4.4994e-12	4.4994
				1.2876	2.51457e-12								-8.71016	-9.43692e-13	-0.943692				8.71088	4.41357e-12	4.41357
				1.28992	1.49771e-12								-8.70784	-2.48984e-12	-2.48984				8.70856	5.80832e-12	5.80832
				1.29224	1.26883e-12								-8.70552	-1.89379e-12	-1.89379				8.70624	2.78875e-12	2.78875
				1.29456	2.05442e-12								-8.7032	-4.299e-13	-0.4299				8.70392	2.24873e-12	2.24873
				1.29688	2.53841e-12								-8.70088	-1.1833e-12	-1.1833				8.7016	2.97949e-12	2.97949
				1.2992	2.09257e-12								-8.69856	-2.18466e-12	-2.18466				8.69928	2.67908e-12	2.67908
				1.30152	8.58753e-13								-8.69624	-4.15281e-12	-4.15281				8.69696	3.84375e-12	3.84375
				1.30384	-5.02617e-13								-8.69392	-3.13714e-12	-3.13714				8.69464	2.21774e-12	2.21774
				1.30616	2.01866e-12								-8.6916	-1.02833e-12	-1.02833				8.69232	3.11538e-12	3.11538
				1.30848	3.07605e-12								-8.68928	-3.01555e-12	-3.01555				8.69	2.75776e-12	2.75776
				1.3108	3.46109e-12								-8.68696	-1.57789e-12	-1.57789				8.68768	1.98766e-12	1.98766
				1.31312	-7.74414e-13								-8.68464	-1.97485e-12	-1.97485				8.68536	1.91018e-12	1.91018
				1.31544	4.43904e-13								-8.68232	-2.5864e-12	-2.5864				8.68304	4.00945e-12	4.00945
				1.31776	1.88872e-12								-8.68	-2.18899e-13	-0.218899				8.68072	4.4553e-12	4.4553
				1.32008	3.16068e-12								-8.67768	-1.24171e-12	-1.24171				8.6784	4.95121e-12	4.95121
				1.3224	3.30656e-13								-8.67536	-2.16082e-12	-2.16082				8.67608	3.9117e-12	3.9117
				1.32472	1.16989e-12								-8.67304	-1.93194e-12	-1.93194				8.67376	3.17976e-12	3.17976
				1.32704	2.40132e-12								-8.67072	-1.09509e-12	-1.09509				8.67144	3.2489e-12	3.2489
				1.32936	2.9771e-12								-8.6684	-6.08714e-13	-0.608714				8.66912	3.2942e-12	3.2942
				1.33168	3.62798e-12								-8.66608	1.15558e-12	1.15558				8.6668	4.51848e-12	4.51848
				1.334	2.62901e-12								-8.66376	3.15158e-13	0.315158				8.66448	5.51193e-13	0.551193
				1.33632	2.33218e-12								-8.66144	-1.19642e-12	-1.19642				8.66216	1.05783e-12	1.05783
				1.33864	4.41596e-12								-8.65912	1.67339e-13	0.167339				8.65984	2.73153e-12	2.73153
				1.34096	2.61709e-12								-8.6568	-2.02254e-12	-2.02254				8.65752	3.75315e-12	3.75315
				1.34328	6.41792e-13								-8.65448	-3.05489e-12	-3.05489				8.6552	4.06548e-12	4.06548
				1.3456	7.51464e-13								-8.65216	-3.34576e-12	-3.34576				8.65288	2.74703e-12	2.74703
				1.34792	-6.63113e-14								-8.64984	-1.67564e-12	-1.67564				8.65056	2.22012e-12	2.22012
				1.35024	1.42261e-12								-8.64752	-2.93687e-12	-2.93687				8.64824	4.64961e-12	4.64961
				1.35256	1.11744e-12								-8.6452	-1.67087e-12	-1.67087				8.64592	3.05578e-12	3.05578
				1.35488	5.73843e-13								-8.64288	-9.40115e-13	-0.940115				8.6436	2.89723e-12	2.89723
				1.3572	2.26185e-12								-8.64056	-4.33476e-13	-0.433476				8.64128	2.58133e-12	2.58133
				1.35952	1.65149e-12								-8.63824	-1.26556e-12	-1.26556				8.63896	1.65865e-12	1.65865
				1.36184	1.47506e-12								-8.63592	-4.47781e-13	-0.447781				8.63664	2.61113e-12	2.61113
				1.36416	3.40268e-12								-8.6336	9.98262e-15	0.00998262				8.63432	2.65762e-12	2.65762
				1.36648	2.39059e-12								-8.63128	1.36897e-12	1.36897				8.632	3.78176e-12	3.78176
				1.3688	1.85177e-12								-8.62896	-4.62086e-13	-0.462086				8.62968	2.24516e-12	2.24516
				1.37112	1.78859e-12								-8.62664	-1.349e-12	-1.349				8.62736	2.21893e-12	2.21893
				1.37344	2.42993e-12								-8.62432	-9.94952e-13	-0.994952				8.62504	2.88173e-12	2.88173
				1.37576	1.26406e-12								-8.622	-1.42887e-12	-1.42887				8.62272	2.45854e-12	2.45854
				1.37808	1.57043e-12								-8.61968	-2.52083e-12	-2.52083				8.6204	5.78611e-13	0.578611
				1.3804	2.34052e-12								-8.61736	-2.55854e-13	-0.255854				8.61808	3.50166e-14	0.0350166
				1.38272	2.25469e-12								-8.61504	-3.95329e-13	-0.395329				8.61576	2.43828e-12	2.43828
				1.38504	1.06856e-12								-8.61272	-1.09151e-12	-1.09151				8.61344	2.82928e-12	2.82928
				1.38736	8.83787e-13								-8.6104	-2.26691e-12	-2.26691				8.61112	3.62202e-12	3.62202
				1.38968	2.54556e-12								-8.60808	-5.30035e-13	-0.530035				8.6088	3.40149e-12	3.40149
				1.392	2.12833e-12								-8.60576	2.48401e-13	0.248401				8.60648	3.4754e-12	3.4754
				1.39432	2.55629e-12								-8.60344	4.45876e-16	0.000445876				8.60416	3.95223e-12	3.95223
				1.39664	3.56361e-12								-8.60112	-1.16423e-12	-1.16423				8.60184	2.91631e-12	2.91631
				1.39896	2.30119e-12								-8.5988	2.8774e-13	0.28774				8.59952	2.04727e-12	2.04727
				1.40128	8.2895e-13								-8.59648	-9.01532e-14	-0.0901532				8.5972	3.48016e-12	3.48016
				1.4036	2.02224e-12								-8.59416	-3.65451e-12	-3.65451				8.59488	3.32996e-12	3.32996
				1.40592	1.79931e-12								-8.59184	-4.34235e-12	-4.34235				8.59256	2.84001e-12	2.84001
				1.40824	2.20463e-12								-8.58952	-2.08929e-12	-2.08929				8.59024	3.85492e-13	0.385492
				1.41056	2.08065e-12								-8.5872	-1.29417e-12	-1.29417				8.58792	1.17704e-12	1.17704
				1.41288	3.78339e-13								-8.58488	4.43904e-13	0.443904				8.5856	3.95581e-12	3.95581
				1.4152	1.21757e-12								-8.58256	-9.72302e-13	-0.972302				8.58328	2.2833e-12	2.2833
				1.41752	8.03916e-13								-8.58024	-1.3645e-12	-1.3645				8.58096	2.8567e-12	2.8567
				1.41984	-1.16661e-12								-8.57792	-1.71974e-12	-1.71974				8.57864	2.22489e-12	2.22489
				1.42216	1.32128e-12								-8.5756	-1.2441e-12	-1.2441				8.57632	2.61947e-12	2.61947
				1.42448	3.5648e-12								-8.57328	-1.03191e-12	-1.03191				8.574	3.50281e-12	3.50281
				1.4268	8.67097e-13								-8.57096	2.30956e-14	0.0230956				8.57168	4.10526e-13	0.410526
				1.42912	-1.18569e-12								-8.56864	-2.74137e-12	-2.74137				8.56936	2.72676e-12	2.72676
				1.43144	2.2237e-12								-8.56632	-1.45868e-12	-1.45868				8.56704	3.71978e-12	3.71978
				1.43376	3.0832e-12								-8.564	-9.15081e-13	-0.915081				8.56472	3.80322e-12	3.80322
				1.43608	2.95564e-12								-8.56168	-2.76044e-12	-2.76044				8.5624	3.52666e-12	3.52666
				1.4384	2.55749e-12								-8.55936	-9.37731e-13	-0.937731				8.56008	2.72438e-12	2.72438
				1.44072	1.65745e-12								-8.55704	-6.1543e-14	-0.061543				8.55776	1.26883e-12	1.26883
				1.44304	2.52411e-12								-8.55472	-6.98876e-14	-0.0698876				8.55544	1.40235e-12	1.40235
				1.44536	2.37629e-12								-8.5524	-7.85143e-13	-0.785143				8.55312	1.54182e-12	1.54182
				1.44768	2.18555e-12								-8.55008	-1.62438e-12	-1.62438				8.5508	2.7816e-12	2.7816
				1.45	2.27615e-12								-8.54776	-2.46719e-12	-2.46719				8.54848	2.74107e-12	2.74107
				1.45232	3.21552e-12								-8.54544	-2.04995e-12	-2.04995				8.54616	1.37851e-12	1.37851
				1.45464	1.13651e-12								-8.54312	-1.00687e-12	-1.00687				8.54384	2.14979e-12	2.14979
				1.45696	2.01031e-12								-8.5408	-9.73494e-13	-0.973494				8.54152	2.3286e-12	2.3286
				1.45928	3.00333e-12								-8.53848	-1.6065e-12	-1.6065				8.5392	3.40268e-12	3.40268
				1.4616	3.53381e-12								-8.53616	-1.06767e-12	-1.06767				8.53688	2.54914e-12	2.54914
				1.46392	3.0081e-12								-8.53384	-1.03191e-12	-1.03191				8.53456	2.24277e-12	2.24277
				1.46624	2.34529e-12								-8.53152	-3.05966e-12	-3.05966				8.53224	2.9628e-12	2.9628
				1.46856	2.77445e-12								-8.5292	-2.91899e-12	-2.91899				8.52992	2.93061e-12	2.93061
				1.47088	2.37867e-12								-8.52688	-3.15502e-12	-3.15502				8.5276	2.63259e-12	2.63259
				1.4732	3.34665e-12								-8.52456	-7.75607e-13	-0.775607				8.52528	9.26702e-13	0.926702
				1.47552	1.49652e-12								-8.52224	-2.24665e-12	-2.24665				8.52296	7.09741e-13	0.709741
				1.47784	1.72421e-12								-8.51992	-1.82584e-12	-1.82584				8.52064	1.41427e-12	1.41427
				1.48016	3.0069e-12								-8.5176	-1.66491e-12	-1.66491				8.51832	2.1176e-12	2.1176
				1.48248	1.57162e-12								-8.51528	-3.53888e-12	-3.53888				8.516	2.86385e-12	2.86385
				1.4848	7.4312e-13								-8.51296	-2.68772e-12	-2.68772				8.51368	1.95786e-12	1.95786
				1.48712	2.31549e-12								-8.51064	6.10797e-13	0.610797				8.51136	4.47675e-12	4.47675
				1.48944	-1.23532e-13								-8.50832	4.24831e-13	0.424831				8.50904	4.21569e-12	4.21569
				1.49176	1.85296e-12								-8.506	-1.72408e-13	-0.172408				8.50672	4.98578e-12	4.98578
				1.49408	2.2082e-12								-8.50368	-2.52441e-12	-2.52441				8.5044	2.41205e-12	2.41205
				1.4964	1.003e-12								-8.50136	-8.08985e-13	-0.808985				8.50208	1.87084e-12	1.87084
				1.49872	1.48818e-12								-8.49904	-1.8926e-12	-1.8926				8.49976	2.27496e-12	2.27496
				1.50104	1.73971e-12								-8.49672	-1.60769e-12	-1.60769				8.49744	3.97488e-12	3.97488
				1.50336	1.06141e-12								-8.4944	-7.75607e-13	-0.775607				8.49512	3.22148e-12	3.22148
				1.50568	-2.57046e-13								-8.49208	-5.01425e-13	-0.501425				8.4928	2.13787e-12	2.13787
				1.508	9.2551e-13								-8.48976	-2.11747e-13	-0.211747				8.49048	5.65216e-12	5.65216
				1.51032	1.08406e-12								-8.48744	2.26944e-13	0.226944				8.48816	6.04674e-12	6.04674
				1.51264	-8.70974e-13								-8.48512	6.08413e-13	0.608413				8.48584	7.61792e-12	7.61792
				1.51496	2.26423e-12								-8.4828	-1.01522e-12	-1.01522				8.48352	5.56037e-12	5.56037
				1.51728	4.26814e-12								-8.48048	-1.24648e-12	-1.24648				8.4812	3.75673e-12	3.75673
				1.5196	3.00452e-12								-8.47816	-5.51493e-13	-0.551493				8.47888	1.94833e-12	1.94833
				1.52192	3.30612e-12								-8.47584	-5.07386e-13	-0.507386				8.47656	3.60891e-12	3.60891
				1.52424	2.44781e-12								-8.47352	3.29464e-13	0.329464				8.47424	3.37645e-12	3.37645
				1.52656	3.24771e-12								-8.4712	-2.73064e-12	-2.73064				8.47192	3.48136e-12	3.48136
				1.52888	4.1835e-12								-8.46888	-1.55047e-12	-1.55047				8.4696	5.36725e-12	5.36725
				1.5312	2.02104e-12								-8.46656	-1.3502e-12	-1.3502				8.46728	4.77478e-12	4.77478
				1.53352	2.66716e-12								-8.46424	-5.20499e-13	-0.520499				8.46496	3.60772e-12	3.60772
				1.53584	1.43811e-12								-8.46192	-1.1988e-12	-1.1988				8.46264	3.87117e-12	3.87117
				1.53816	6.29871e-13								-8.4596	-3.69266e-12	-3.69266				8.46032	6.14568e-12	6.14568
				1.54048	2.81975e-12								-8.45728	-7.87527e-13	-0.787527				8.458	3.5803e-12	3.5803
				1.5428	2.03892e-12								-8.45496	1.02922e-12	1.02922				8.45568	3.30016e-12	3.30016
				1.54512	2.23443e-12								-8.45264	-1.98677e-12	-1.98677				8.45336	2.07707e-12	2.07707
				1.54744	3.20837e-12								-8.45032	-2.62216e-12	-2.62216				8.45104	2.40371e-12	2.40371
				1.54976	2.34768e-12								-8.448	-7.92296e-13	-0.792296				8.44872	9.36239e-13	0.936239
				1.55208	-5.00233e-13								-8.44568	-1.50636e-12	-1.50636				8.4464	1.93164e-12	1.93164
				1.5544	3.3097e-12								-8.44336	-2.86849e-13	-0.286849				8.44408	2.17244e-12	2.17244
				1.55672	9.33855e-13								-8.44104	-1.51947e-12	-1.51947				8.44176	2.99379e-12	2.99379
				1.55904	2.03416e-12								-8.43872	-2.10121e-12	-2.10121				8.43944	1.70514e-12	1.70514
				1.56136	6.03645e-13								-8.4364	-1.01879e-12	-1.01879				8.43712	3.14399e-12	3.14399
				1.56368	2.18317e-12								-8.43408	1.10909e-12	1.10909				8.4348	2.31549e-12	2.31549
				1.566	3.0987e-12								-8.43176	1.00582e-13	0.100582				8.43248	4.29079e-12	4.29079
				1.56832	2.88173e-12								-8.42944	4.66554e-13	0.466554				8.43016	1.88157e-12	1.88157
				1.57064	1.92091e-12								-8.42712	-3.41248e-14	-0.0341248				8.42784	1.77786e-12	1.77786
				1.57296	2.79233e-12								-8.4248	-5.24075e-13	-0.524075				8.42552	2.79233e-12	2.79233
				1.57528	2.44781e-12								-8.42248	-5.69375e-13	-0.569375				8.4232	3.38599e-12	3.38599
				1.5776	2.01151e-12								-8.42016	-1.53334e-13	-0.153334				8.42088	4.54113e-12	4.54113
				1.57992	1.07691e-12								-8.41784	1.62646e-12	1.62646				8.41856	3.72335e-12	3.72335
				1.58224	2.24873e-12								-8.41552	2.23681e-12	2.23681				8.41624	2.78994e-12	2.78994
				1.58456	4.82051e-13								-8.4132	-1.03906e-12	-1.03906				8.41392	2.13072e-12	2.13072
				1.58688	-2.12939e-13								-8.41088	-1.54526e-13	-0.154526				8.4116	2.2535e-12	2.2535
				1.5892	6.06029e-13								-8.40856	-1.21549e-12	-1.21549				8.40928	2.61232e-12	2.61232
				1.59152	6.00069e-13								-8.40624	-1.22383e-12	-1.22383				8.40696	1.27241e-12	1.27241
				1.59384	8.65905e-13								-8.40392	-7.23155e-13	-0.723155				8.40464	1.59666e-12	1.59666
				1.59616	7.7173e-13								-8.4016	-5.63414e-13	-0.563414				8.40232	2.56225e-12	2.56225
				1.59848	2.55033e-12								-8.39928	-1.90809e-12	-1.90809				8.4	4.30032e-12	4.30032
				1.6008	1.71587e-12								-8.39696	-5.6103e-13	-0.56103				8.39768	2.35245e-12	2.35245
				1.60312	1.65149e-12								-8.39464	-2.21923e-12	-2.21923				8.39536	3.0379e-12	3.0379
				1.60544	2.76253e-12								-8.39232	-1.34781e-12	-1.34781				8.39304	1.13293e-12	1.13293
				1.60776	1.70275e-12								-8.39	-1.32516e-12	-1.32516				8.39072	2.4502e-12	2.4502
				1.61008	3.48374e-12								-8.38768	2.71051e-13	0.271051				8.3884	3.31208e-12	3.31208
				1.6124	7.52656e-13								-8.38536	-2.06978e-13	-0.206978				8.38608	2.94611e-12	2.94611
				1.61472	-8.57861e-13								-8.38304	-8.48324e-13	-0.848324				8.38376	2.66001e-12	2.66001
				1.61704	9.38623e-13								-8.38072	-1.02356e-12	-1.02356				8.38144	2.63259e-12	2.63259
				1.61936	1.31532e-12								-8.3784	-2.13221e-12	-2.13221				8.37912	3.38837e-12	3.38837
				1.62168	6.29871e-13								-8.37608	1.91181e-13	0.191181				8.3768	2.9628e-12	2.9628
				1.624	1.27718e-12								-8.37376	-1.53616e-12	-1.53616				8.37448	3.97965e-12	3.97965
				1.62632	1.39162e-12								-8.37144	-1.2131e-12	-1.2131				8.37216	3.97608e-12	3.97608
				1.62864	2.82928e-12								-8.36912	-2.22475e-13	-0.222475				8.36984	4.17396e-12	4.17396
				1.63096	2.39178e-12								-8.3668	-1.22026e-12	-1.22026				8.36752	3.46944e-12	3.46944
				1.63328	1.91256e-12								-8.36448	-3.85001e-12	-3.85001				8.3652	4.50775e-12	4.50775
				1.6356	2.02104e-12								-8.36216	-7.36267e-13	-0.736267				8.36288	1.42977e-12	1.42977
				1.63792	4.4553e-12								-8.35984	-1.01403e-12	-1.01403				8.36056	1.24022e-12	1.24022
				1.64024	2.82213e-12								-8.35752	4.47481e-13	0.447481				8.35824	2.68385e-12	2.68385
				1.64256	2.47642e-12								-8.3552	9.14781e-13	0.914781				8.35592	3.71501e-12	3.71501
				1.64488	2.82094e-12								-8.35288	-1.34066e-12	-1.34066				8.3536	3.64825e-12	3.64825
				1.6472	-3.88932e-14								-8.35056	-3.58374e-13	-0.358374				8.35128	2.31668e-12	2.31668
				1.64952	7.13317e-13								-8.34824	-1.40221e-13	-0.140221				8.34896	3.97846e-12	3.97846
				1.65184	2.24277e-12								-8.34592	1.20565e-12	1.20565				8.34664	3.61726e-12	3.61726
				1.65416	2.14264e-12								-8.3436	-1.69948e-12	-1.69948				8.34432	3.746e-12	3.746
				1.65648	3.24651e-12								-8.34128	-2.31817e-12	-2.31817				8.342	3.28585e-12	3.28585
				1.6588	1.63481e-12								-8.33896	1.44689e-13	0.144689				8.33968	1.9674e-12	1.9674
				1.66112	2.29328e-13								-8.33664	-1.49563e-12	-1.49563				8.33736	3.18214e-12	3.18214
				1.66344	1.36539e-12								-8.33432	-1.61126e-12	-1.61126				8.33504	2.42516e-12	2.42516
				1.66576	3.26324e-14								-8.332	-2.99052e-12	-2.99052				8.33272	1.99959e-12	1.99959
				1.66808	4.85628e-13								-8.32968	-1.31562e-12	-1.31562				8.3304	6.79939e-13	0.679939
				1.6704	-1.29492e-13								-8.32736	-1.49758e-13	-0.149758				8.32808	5.47616e-13	0.547616
				1.67272	1.02445e-12								-8.32504	-8.59053e-13	-0.859053				8.32576	1.7266e-12	1.7266
				1.67504	1.01372e-12								-8.32272	1.11747e-14	0.0111747				8.32344	3.65421e-12	3.65421
				1.67736	1.62765e-12								-8.3204	-1.5147e-12	-1.5147				8.32112	1.98333e-13	0.198333
				1.67968	2.29284e-12								-8.31808	5.14238e-13	0.514238				8.3188	7.86035e-13	0.786035
				1.682	3.23459e-12								-8.31576	1.88797e-13	0.188797				8.31648	2.11045e-12	2.11045
				1.68432	2.77445e-12								-8.31344	-8.53093e-13	-0.853093				8.31416	5.953e-13	0.5953
				1.68664	3.66136e-12								-8.31112	-1.38e-12	-1.38				8.31184	2.14264e-12	2.14264
				1.68896	2.32145e-12								-8.3088	2.19791e-13	0.219791				8.30952	2.98545e-12	2.98545
				1.69128	1.76951e-12								-8.30648	-2.97502e-12	-2.97502				8.3072	3.84971e-12	3.84971
				1.6936	1.02326e-12								-8.30416	-3.33622e-12	-3.33622				8.30488	3.0832e-12	3.0832
				1.69592	3.85448e-12								-8.30184	-2.05711e-12	-2.05711				8.30256	2.75776e-12	2.75776
				1.69824	1.9817e-12								-8.29952	-9.29387e-13	-0.929387				8.30024	3.49805e-12	3.49805
				1.70056	2.64212e-12								-8.2972	-1.23933e-12	-1.23933				8.29792	2.39894e-12	2.39894
				1.70288	3.75435e-12								-8.29488	-1.09747e-12	-1.09747				8.2956	2.20343e-12	2.20343
				1.7052	9.97035e-13								-8.29256	-2.16201e-12	-2.16201				8.29328	4.17516e-12	4.17516
				1.70752	2.26661e-12								-8.29024	8.06301e-13	0.806301				8.29096	4.59835e-12	4.59835
				1.70984	2.15337e-12								-8.28792	-2.99648e-12	-2.99648				8.28864	1.88872e-12	1.88872
				1.71216	2.43351e-12								-8.2856	-1.22979e-12	-1.22979				8.28632	1.2283e-12	1.2283
				1.71448	2.61471e-12								-8.28328	-2.24546e-12	-2.24546				8.284	3.41698e-12	3.41698
				1.7168	1.01253e-12								-8.28096	-6.70668e-15	-0.00670668				8.28168	4.04164e-12	4.04164
				1.71912	9.30278e-13								-8.27864	3.08006e-13	0.308006				8.27936	9.61273e-13	0.961273
				1.72144	2.93776e-12								-8.27632	-3.03538e-13	-0.303538				8.27704	1.50487e-12	1.50487
				1.72376	3.23459e-12								-8.274	-9.65149e-13	-0.965149				8.27472	1.48265e-13	0.148265
				1.72608	2.30953e-12								-8.27168	-2.57328e-12	-2.57328				8.2724	1.10075e-12	1.10075
				1.7284	2.06157e-12								-8.26936	-2.21565e-12	-2.21565				8.27008	1.18062e-12	1.18062
				1.73072	1.54301e-12								-8.26704	-1.53378e-12	-1.53378				8.26776	3.26559e-12	3.26559
				1.73304	2.07707e-12								-8.26472	-1.42605e-13	-0.142605				8.26544	1.47149e-12	1.47149
				1.73536	3.27632e-12								-8.2624	-2.27244e-13	-0.227244				8.26312	2.32622e-12	2.32622
				1.73768	2.72557e-12								-8.26008	7.10933e-13	0.710933				8.2608	1.57997e-12	1.57997
				1.74	9.0286e-13								-8.25776	-9.06737e-13	-0.906737				8.25848	1.82792e-12	1.82792
				1.74232	-1.69948e-12								-8.25544	-1.66372e-12	-1.66372				8.25616	2.64332e-12	2.64332
				1.74464	3.0522e-12								-8.25312	-1.55524e-12	-1.55524				8.25384	1.66818e-12	1.66818
				1.74696	8.68289e-13								-8.2508	-2.51606e-12	-2.51606				8.25152	2.5098e-12	2.5098
				1.74928	1.60262e-12								-8.24848	-2.40758e-12	-2.40758				8.2492	2.24158e-12	2.24158
				1.7516	2.18436e-12								-8.24616	-7.83951e-13	-0.783951				8.24688	1.84938e-12	1.84938
				1.75392	2.13429e-12								-8.24384	-1.63868e-12	-1.63868				8.24456	1.09598e-12	1.09598
				1.75624	2.34052e-12								-8.24152	2.57938e-13	0.257938				8.24224	9.49352e-13	0.949352
				1.75856	8.40871e-13								-8.2392	-1.51113e-12	-1.51113				8.23992	1.48341e-12	1.48341
				1.76088	1.9364e-12								-8.23688	1.2736e-12	1.2736				8.2376	9.39815e-13	0.939815
				1.7632	1.28433e-12								-8.23456	1.59189e-12	1.59189				8.23528	2.94968e-12	2.94968
				1.76552	3.93078e-12								-8.23224	-5.74143e-13	-0.574143				8.23296	3.20122e-12	3.20122
				1.76784	2.50265e-12								-8.22992	-1.72408e-13	-0.172408				8.23064	4.19065e-12	4.19065
				1.77016	2.12476e-12								-8.2276	-9.55613e-13	-0.955613				8.22832	3.34427e-12	3.34427
				1.77248	1.23784e-12								-8.22528	-1.2131e-12	-1.2131				8.226	1.58474e-12	1.58474
				1.7748	1.67772e-12								-8.22296	-1.54093e-12	-1.54093				8.22368	1.67891e-12	1.67891
				1.77712	3.20002e-12								-8.22064	-1.25006e-12	-1.25006				8.22136	2.35364e-12	2.35364
				1.77944	4.62815e-12								-8.21832	-6.1543e-14	-0.061543				8.21904	2.25708e-12	2.25708
				1.78176	4.2741e-12								-8.216	-1.1833e-12	-1.1833				8.21672	4.22284e-12	4.22284
				1.78408	4.63173e-12								-8.21368	-8.86471e-13	-0.886471				8.2144	3.5505e-12	3.5505
				1.7864	3.02955e-12								-8.21136	-4.06058e-13	-0.406058				8.21208	3.92362e-12	3.92362
				1.78872	2.7971e-12								-8.20904	3.92644e-13	0.392644				8.20976	1.41904e-12	1.41904
				1.79104	6.93052e-13								-8.20672	2.50026e-12	2.50026				8.20744	2.46569e-12	2.46569
				1.79336	6.33447e-13								-8.2044	-4.5851e-13	-0.45851				8.20512	1.94833e-12	1.94833
				1.79568	7.7173e-13								-8.20208	-1.63153e-12	-1.63153				8.2028	1.97098e-12	1.97098
				1.798	2.58848e-12								-8.19976	-7.13618e-13	-0.713618				8.20048	2.47046e-12	2.47046
				1.80032	3.72454e-12								-8.19744	-2.16515e-13	-0.216515				8.19816	2.31907e-12	2.31907
				1.80264	2.41563e-12								-8.19512	-6.02753e-13	-0.602753				8.19584	4.09648e-12	4.09648
				1.80496	1.71352e-14								-8.1928	-6.51192e-14	-0.0651192				8.19352	1.59904e-12	1.59904
				1.80728	1.37374e-12								-8.19048	-3.04893e-12	-3.04893				8.1912	1.9376e-12	1.9376
				1.8096	2.24635e-12								-8.18816	2.41249e-13	0.241249				8.18888	3.15711e-12	3.15711
				1.81192	2.9318e-12								-8.18584	7.67398e-14	0.0767398				8.18656	3.97369e-12	3.97369
				1.81424	1.45003e-12								-8.18352	-2.15323e-13	-0.215323				8.18424	2.46093e-12	2.46093
				1.81656	2.99021e-12								-8.1812	-4.65662e-13	-0.465662				8.18192	1.75759e-12	1.75759
				1.81888	3.97012e-12								-8.17888	-6.409e-13	-0.6409				8.1796	8.09877e-13	0.809877
				1.8212	2.14025e-12								-8.17656	-3.846e-13	-0.3846				8.17728	2.73868e-12	2.73868
				1.82352	-6.65934e-13								-8.17424	1.10909e-12	1.10909				8.17496	2.47761e-12	2.47761
				1.82584	5.0947e-13								-8.17192	2.35483e-12	2.35483				8.17264	2.15337e-12	2.15337
				1.82816	1.03399e-12								-8.1696	4.17678e-13	0.417678				8.17032	2.24754e-12	2.24754
				1.83048	6.01261e-13								-8.16728	-4.70431e-13	-0.470431				8.168	1.35466e-12	1.35466
				1.8328	2.89246e-12								-8.16496	1.83273e-14	0.0183273				8.16568	5.63114e-13	0.563114
				1.83512	2.61947e-12								-8.16264	6.68018e-13	0.668018				8.16336	2.98425e-12	2.98425
				1.83744	4.67226e-12								-8.16032	-8.2329e-13	-0.82329				8.16104	1.4095e-12	1.4095
				1.83976	3.65898e-12								-8.158	-1.01999e-12	-1.01999				8.15872	2.41801e-12	2.41801
				1.84208	2.82928e-12								-8.15568	-2.86849e-13	-0.286849				8.1564	2.19151e-12	2.19151
				1.8444	1.09717e-12								-8.15336	-2.34559e-12	-2.34559				8.15408	3.42056e-12	3.42056
				1.84672	2.12595e-12								-8.15104	-4.78775e-13	-0.478775				8.15176	3.75196e-12	3.75196
				1.84904	2.74107e-12								-8.14872	-1.17257e-12	-1.17257				8.14944	3.42175e-12	3.42175
				1.85136	2.29046e-12								-8.1464	-1.33231e-12	-1.33231				8.14712	3.60891e-12	3.60891
				1.85368	2.10568e-12								-8.14408	-9.07929e-13	-0.907929				8.1448	2.71246e-12	2.71246
				1.856	1.05902e-12								-8.14176	-1.20714e-12	-1.20714				8.14248	2.96041e-12	2.96041
				1.85832	1.50368e-12								-8.13944	-1.28105e-12	-1.28105				8.14016	8.49216e-13	0.849216
				1.86064	-2.34396e-13								-8.13712	-2.6758e-12	-2.6758				8.13784	-7.10797e-14	-0.0710797
				1.86296	3.79531e-13								-8.1348	-1.35616e-12	-1.35616				8.13552	1.83746e-12	1.83746
				1.86528	1.75521e-12								-8.13248	1.07691e-12	1.07691				8.1332	6.00069e-13	0.600069
				1.8676	2.35602e-12								-8.13016	1.38447e-12	1.38447				8.13088	2.47642e-12	2.47642
				1.86992	2.35364e-12								-8.12784	5.05138e-14	0.0505138				8.12856	1.45242e-12	1.45242
				1.87224	4.09171e-12								-8.12552	9.74386e-13	0.974386				8.12624	3.37764e-12	3.37764
				1.87456	1.89945e-12								-8.1232	-6.30171e-13	-0.630171				8.12392	1.88395e-12	1.88395
				1.87688	1.24618e-12								-8.12088	-1.95459e-12	-1.95459				8.1216	1.7719e-12	1.7719
				1.8792	2.33576e-12								-8.11856	-1.89379e-12	-1.89379				8.11928	1.43096e-12	1.43096
				1.88152	2.05323e-12								-8.11624	-4.31092e-13	-0.431092				8.11696	2.39655e-12	2.39655
				1.88384	1.78143e-12								-8.11392	-7.00505e-13	-0.700505				8.11464	2.91273e-12	2.91273
				1.88616	2.44781e-12								-8.1116	2.00717e-13	0.200717				8.11232	1.21996e-12	1.21996
				1.88848	2.31311e-12								-8.10928	-1.07721e-12	-1.07721				8.11	1.19254e-12	1.19254
				1.8908	3.35976e-12								-8.10696	-1.40026e-12	-1.40026				8.10768	1.53348e-12	1.53348
				1.89312	3.96415e-12								-8.10464	-2.25023e-12	-2.25023				8.10536	2.30119e-12	2.30119
				1.89544	2.3739e-12								-8.10232	-7.89912e-13	-0.789912				8.10304	5.1491e-12	5.1491
				1.89776	4.79743e-12								-8.1	-6.9216e-13	-0.69216				8.10072	5.68911e-12	5.68911
				1.90008	4.12509e-12								-8.09768	-3.69103e-13	-0.369103				8.0984	3.20122e-12	3.20122
				1.9024	2.58729e-12								-8.09536	-1.57073e-12	-1.57073				8.09608	2.15813e-12	2.15813
				1.90472	3.85925e-12								-8.09304	-1.63749e-12	-1.63749				8.09376	9.69617e-13	0.969617
				1.90704	2.22131e-12								-8.09072	2.47209e-13	0.247209				8.09144	3.25887e-13	0.325887
				1.90936	2.09376e-12								-8.0884	8.516e-13	0.8516				8.08912	4.50536e-12	4.50536
				1.91168	4.44099e-12								-8.08608	-7.41036e-13	-0.741036				8.0868	5.26592e-12	5.26592
				1.914	3.10585e-12								-8.08376	-3.04297e-12	-3.04297				8.08448	1.45361e-12	1.45361
				1.91632	3.54215e-12								-8.08144	-1.78531e-12	-1.78531				8.08216	1.67414e-12	1.67414
				1.91864	3.12373e-12								-8.07912	-5.37188e-13	-0.537188				8.07984	1.75163e-12	1.75163
				1.92096	2.86028e-12								-8.0768	-1.79723e-12	-1.79723				8.07752	3.33354e-12	3.33354
				1.92328	2.47523e-12								-8.07448	-2.15724e-12	-2.15724				8.0752	3.92243e-12	3.92243
				1.9256	1.91733e-12								-8.07216	-1.62557e-12	-1.62557				8.07288	2.90558e-12	2.90558
				1.92792	2.71246e-12								-8.06984	-1.4253e-12	-1.4253				8.07056	4.78475e-13	0.478475
				1.93024	3.56957e-12								-8.06752	-6.81431e-13	-0.681431				8.06824	1.91495e-12	1.91495
				1.93256	2.691e-12								-8.0652	-1.38596e-12	-1.38596				8.06592	1.72421e-12	1.72421
				1.93488	1.59189e-12								-8.06288	-3.03701e-12	-3.03701				8.0636	2.98187e-12	2.98187
				1.9372	3.02836e-12								-8.06056	-3.25754e-12	-3.25754				8.06128	6.60865e-13	0.660865
				1.93952	1.94833e-12								-8.05824	-1.4551e-12	-1.4551				8.05896	2.42278e-12	2.42278
				1.94184	-3.48837e-13								-8.05592	-1.14277e-12	-1.14277				8.05664	2.85312e-12	2.85312
				1.94416	2.76729e-12								-8.0536	-2.31221e-12	-2.31221				8.05432	2.8269e-12	2.8269
				1.94648	1.18777e-12								-8.05128	5.41656e-13	0.541656				8.052	3.27155e-12	3.27155
				1.9488	3.37168e-12								-8.04896	8.83787e-13	0.883787				8.04968	2.68027e-12	2.68027
				1.95112	2.12833e-12								-8.04664	-2.96385e-13	-0.296385				8.04736	4.07979e-12	4.07979
				1.95344	2.45377e-12								-8.04432	-1.47374e-13	-0.147374				8.04504	4.12747e-12	4.12747
				1.95576	2.14741e-12								-8.042	-1.169e-12	-1.169				8.04272	3.8223e-12	3.8223
				1.95808	1.85773e-12								-8.03968	-1.11535e-12	-1.11535				8.0404	1.77428e-12	1.77428
				1.9604	1.84819e-12								-8.03736	-1.0784e-12	-1.0784				8.03808	3.39553e-12	3.39553
				1.96272	5.06922e-12								-8.03504	-2.435e-12	-2.435				8.03576	1.70871e-12	1.70871
				1.96504	3.30254e-12								-8.03272	-1.38834e-12	-1.38834				8.03344	2.84836e-12	2.84836
				1.96736	2.60875e-12								-8.0304	-7.11234e-13	-0.711234				8.03112	2.26185e-12	2.26185
				1.96968	1.12578e-12								-8.02808	-1.88068e-12	-1.88068				8.0288	5.25281e-12	5.25281
				1.972	2.83167e-12								-8.02576	-1.92478e-12	-1.92478				8.02648	4.51848e-12	4.51848
				1.97432	2.01985e-12								-8.02344	-3.10615e-12	-3.10615				8.02416	2.49669e-12	2.49669
				1.97664	2.1629e-12								-8.02112	-1.97442e-13	-0.197442				8.02184	2.35721e-12	2.35721
				1.97896	3.04982e-12								-8.0188	1.2438e-12	1.2438				8.01952	1.31532e-12	1.31532
				1.98128	1.40712e-12								-8.01648	-3.41248e-14	-0.0341248				8.0172	1.14486e-12	1.14486
				1.9836	3.08201e-12								-8.01416	2.90561e-14	0.0290561				8.01488	3.63871e-12	3.63871
				1.98592	3.07485e-12								-8.01184	-2.03803e-12	-2.03803				8.01256	2.40013e-12	2.40013
				1.98824	1.95429e-12								-8.00952	-5.00233e-13	-0.500233				8.01024	1.5156e-12	1.5156
				1.99056	1.79216e-12								-8.0072	-1.46182e-13	-0.146182				8.00792	1.64553e-12	1.64553
				1.99288	2.39417e-12								-8.00488	2.32904e-13	0.232904				8.0056	1.32963e-12	1.32963
				1.9952	3.67924e-12								-8.00256	-9.22234e-13	-0.922234				8.00328	3.33235e-12	3.33235
				1.99752	2.90438e-12								-8.00024	-2.02373e-12	-2.02373				8.00096	2.51099e-12	2.51099
				1.99984	2.98068e-12								-7.99792	-3.92945e-13	-0.392945				7.99864	1.34632e-12	1.34632
				2.00216	2.63139e-12								-7.9956	-6.2735e-14	-0.062735				7.99632	1.91018e-12	1.91018
				2.00448	1.64792e-12								-7.99328	1.4846e-12	1.4846				7.994	2.18198e-12	2.18198
				2.0068	1.17704e-12								-7.99096	-5.50301e-13	-0.550301				7.99168	3.2191e-12	3.2191
				2.00912	1.42142e-12								-7.98864	-1.75789e-12	-1.75789				7.98936	2.32622e-12	2.32622
				2.01144	2.84478e-12								-7.98632	-1.02595e-12	-1.02595				7.98704	3.25009e-12	3.25009
				2.01376	2.16767e-12								-7.984	2.68667e-13	0.268667				7.98472	2.76253e-12	2.76253
				2.01608	1.75044e-12								-7.98168	-1.43007e-12	-1.43007				7.9824	1.99005e-12	1.99005
				2.0184	2.3441e-12								-7.97936	-1.71259e-12	-1.71259				7.98008	2.1331e-12	2.1331
				2.02072	2.19151e-12								-7.97704	-1.68831e-13	-0.168831				7.97776	1.4703e-12	1.4703
				2.02304	8.12261e-13								-7.97472	-8.81703e-13	-0.881703				7.97544	7.59809e-13	0.759809
				2.02536	9.63657e-13								-7.9724	-9.23426e-13	-0.923426				7.97312	8.63521e-13	0.863521
				2.02768	1.44407e-12								-7.97008	-4.62086e-13	-0.462086				7.9708	2.39655e-12	2.39655
				2.03	1.14605e-12								-7.96776	-6.51192e-14	-0.0651192				7.96848	2.09853e-12	2.09853
				2.03232	3.55527e-12								-7.96544	-1.97724e-12	-1.97724				7.96616	2.57894e-12	2.57894
				2.03464	3.83064e-12								-7.96312	4.45876e-16	0.000445876				7.96384	2.27734e-12	2.27734
				2.03696	3.25605e-12								-7.9608	-7.79183e-13	-0.779183				7.96152	2.11164e-12	2.11164
				2.03928	3.52308e-12								-7.95848	-1.20357e-12	-1.20357				7.9592	3.11777e-12	3.11777
				2.0416	2.93538e-12								-7.95616	-3.15145e-12	-3.15145				7.95688	4.49702e-12	4.49702
				2.04392	1.16274e-12								-7.95384	-2.91617e-13	-0.291617				7.95456	3.79011e-12	3.79011
				2.04624	1.83865e-12								-7.95152	-6.85007e-13	-0.685007				7.95224	4.10721e-12	4.10721
				2.04856	3.83898e-12								-7.9492	-1.07959e-12	-1.07959				7.94992	2.76491e-12	2.76491
				2.05088	1.79097e-12								-7.94688	6.13182e-13	0.613182				7.9476	4.81412e-12	4.81412
				2.0532	6.04837e-13								-7.94456	1.72107e-13	0.172107				7.94528	2.63974e-12	2.63974
				2.05552	1.28552e-12								-7.94224	-2.33844e-12	-2.33844				7.94296	2.44781e-12	2.44781
				2.05784	3.84137e-12								-7.93992	-9.17466e-13	-0.917466				7.94064	3.00333e-12	3.00333
				2.06016	4.20853e-12								-7.9376	-8.73358e-13	-0.873358				7.93832	2.06396e-12	2.06396
				2.06248	2.60278e-12								-7.93528	-1.25125e-12	-1.25125				7.936	1.72421e-12	1.72421
				2.0648	1.58951e-12								-7.93296	-6.98121e-13	-0.698121				7.93368	1.22711e-12	1.22711
				2.06712	3.77147e-13								-7.93064	-5.67746e-14	-0.0567746				7.93136	1.45957e-12	1.45957
				2.06944	2.20701e-12								-7.92832	9.38623e-13	0.938623				7.92904	4.07979e-12	4.07979
				2.07176	3.22386e-12								-7.926	-1.37837e-13	-0.137837				7.92672	4.63292e-12	4.63292
				2.07408	4.70325e-12								-7.92368	-1.16379e-13	-0.116379				7.9244	3.03432e-12	3.03432
				2.0764	2.47523e-12								-7.92136	-1.36688e-12	-1.36688				7.92208	1.7719e-12	1.7719
				2.07872	3.74243e-12								-7.91904	-5.45533e-13	-0.545533				7.91976	1.6801e-12	1.6801
				2.08104	2.29284e-12								-7.91672	-9.05545e-13	-0.905545				7.91744	2.75895e-12	2.75895
				2.08336	3.57553e-12								-7.9144	-1.52142e-13	-0.152142				7.91512	6.2391e-13	0.62391
				2.08568	2.02939e-12								-7.91208	-8.85279e-13	-0.885279				7.9128	2.62901e-12	2.62901
				2.088	2.07469e-12								-7.90976	-7.77991e-13	-0.777991				7.91048	3.05697e-12	3.05697
				2.09032	3.28228e-12								-7.90744	7.07794e-14	0.0707794				7.90816	1.49295e-12	1.49295
				2.09264	2.32741e-12								-7.90512	-1.64822e-12	-1.64822				7.90584	1.46553e-12	1.46553
				2.09496	2.31072e-12								-7.9028	-8.30443e-13	-0.830443				7.90352	1.86965e-12	1.86965
				2.09728	4.48629e-12								-7.90048	-8.70974e-13	-0.870974				7.9012	1.90899e-12	1.90899
				2.0996	1.60143e-12								-7.89816	-2.19539e-12	-2.19539				7.89888	2.60517e-12	2.60517
				2.10192	2.09734e-12								-7.89584	-2.92853e-12	-2.92853				7.89656	2.10449e-12	2.10449
				2.10424	2.37509e-12								-7.89352	-2.5411e-12	-2.5411				7.89424	1.94833e-12	1.94833
				2.10656	1.5144e-12								-7.8912	1.22039e-13	0.122039				7.89192	2.25708e-12	2.25708
				2.10888	4.1227e-12								-7.88888	-6.1543e-14	-0.061543				7.8896	3.48851e-12	3.48851
				2.1112	4.5447e-12								-7.88656	-3.45261e-13	-0.345261				7.88728	1.93521e-12	1.93521
				2.11352	2.8567e-12								-7.88424	-1.48609e-12	-1.48609				7.88496	1.52871e-12	1.52871
				2.11584	1.47626e-12								-7.88192	-1.8771e-12	-1.8771				7.88264	3.20002e-12	3.20002
				2.11816	2.90561e-14								-7.8796	-2.15843e-12	-2.15843				7.88032	3.54454e-12	3.54454
				2.12048	3.42294e-12								-7.87728	6.68018e-13	0.668018				7.878	3.0224e-12	3.0224
				2.1228	2.53364e-12								-7.87496	2.54556e-12	2.54556				7.87568	1.97574e-12	1.97574
				2.12512	2.9318e-12								-7.87264	1.46076e-12	1.46076				7.87336	3.32042e-12	3.32042
				2.12744	3.61726e-12								-7.87032	-9.7111e-13	-0.97111				7.87104	3.25605e-12	3.25605
				2.12976	3.75554e-12								-7.868	2.84164e-13	0.284164				7.86872	2.98545e-12	2.98545
				2.13208	3.32638e-12								-7.86568	5.953e-13	0.5953				7.8664	2.91273e-12	2.91273
				2.1344	4.4851e-12								-7.86336	-4.52549e-13	-0.452549				7.86408	2.91392e-12	2.91392
				2.13672	4.96909e-12								-7.86104	-4.56126e-13	-0.456126				7.86176	2.72319e-12	2.72319
				2.13904	3.23698e-12								-7.85872	1.3344e-12	1.3344				7.85944	1.58593e-12	1.58593
				2.14136	3.11538e-12								-7.8564	5.29735e-13	0.529735				7.85712	1.03995e-12	1.03995
				2.14368	9.74386e-13								-7.85408	-1.13562e-12	-1.13562				7.8548	2.35006e-12	2.35006
				2.146	1.4703e-12								-7.85176	-4.38244e-13	-0.438244				7.85248	4.85346e-12	4.85346
				2.14832	1.57043e-12								-7.84944	-1.24724e-13	-0.124724				7.85016	3.89621e-12	3.89621
				2.15064	3.11896e-12								-7.84712	-8.98392e-13	-0.898392				7.84784	2.72915e-12	2.72915
				2.15296	7.64577e-13								-7.8448	-5.87256e-13	-0.587256				7.84552	2.45258e-12	2.45258
				2.15528	2.09853e-12								-7.84248	-1.80081e-12	-1.80081				7.8432	3.33354e-12	3.33354
				2.1576	2.10449e-12								-7.84016	-2.33725e-12	-2.33725				7.84088	1.89945e-12	1.89945
				2.15992	2.27019e-12								-7.83784	-1.34304e-12	-1.34304				7.83856	2.93538e-12	2.93538
				2.16224	3.50878e-12								-7.83552	-7.1481e-13	-0.71481				7.83624	4.85465e-12	4.85465
				2.16456	3.31446e-12								-7.8332	-3.31e-12	-3.31				7.83392	2.72199e-12	2.72199
				2.16688	2.61709e-12								-7.83088	-2.07976e-12	-2.07976				7.8316	2.33337e-12	2.33337
				2.1692	7.7769e-13								-7.82856	6.29871e-13	0.629871				7.82928	4.46245e-12	4.46245
				2.17152	1.13889e-12								-7.82624	-9.49216e-14	-0.0949216				7.82696	3.28466e-12	3.28466
				2.17384	2.92107e-12								-7.82392	8.43256e-13	0.843256				7.82464	2.76968e-12	2.76968
				2.17616	1.10075e-12								-7.8216	1.52871e-12	1.52871				7.82232	8.03916e-13	0.803916
				2.17848	2.26781e-12								-7.81928	-7.79183e-13	-0.779183				7.82	1.96859e-12	1.96859
				2.1808	2.58729e-12								-7.81696	-4.0725e-13	-0.40725				7.81768	1.20327e-12	1.20327
				2.18312	2.03416e-12								-7.81464	6.39408e-13	0.639408				7.81536	-9.30579e-13	-0.930579
				2.18544	1.847e-12								-7.81232	-8.20906e-13	-0.820906				7.81304	2.86981e-12	2.86981
				2.18776	3.75315e-12								-7.81	-3.35724e-13	-0.335724				7.81072	1.61096e-12	1.61096
				2.19008	2.58013e-12								-7.80768	8.13453e-13	0.813453				7.8084	1.003e-12	1.003
				2.1924	2.29165e-12								-7.80536	3.89068e-13	0.389068				7.80608	7.70538e-13	0.770538
				2.19472	2.70888e-12								-7.80304	-9.01968e-13	-0.901968				7.80376	2.9926e-12	2.9926
				2.19704	3.13923e-12								-7.80072	-1.169e-12	-1.169				7.80144	5.00843e-12	5.00843
				2.19936	2.67073e-12								-7.7984	-7.56533e-13	-0.756533				7.79912	3.41102e-12	3.41102
				2.20168	2.48834e-12								-7.79608	-2.66583e-13	-0.266583				7.7968	3.00571e-12	3.00571
				2.204	1.74925e-12								-7.79376	-2.82481e-12	-2.82481				7.79448	6.06029e-13	0.606029
				2.20632	2.8865e-12								-7.79144	8.94516e-13	0.894516				7.79216	1.57401e-12	1.57401
				2.20864	2.66477e-12								-7.78912	1.4751e-14	0.014751				7.78984	2.14025e-12	2.14025
				2.21096	4.37543e-12								-7.7868	-1.37837e-13	-0.137837				7.78752	3.8664e-12	3.8664
				2.21328	2.36675e-12								-7.78448	-6.63113e-14	-0.0663113				7.7852	3.09631e-12	3.09631
				2.2156	2.32264e-12								-7.78216	4.93217e-14	0.0493217				7.78288	2.48358e-12	2.48358
				2.21792	3.40864e-12								-7.77984	1.20847e-13	0.120847				7.78056	2.44185e-12	2.44185
				2.22024	3.24175e-12								-7.77752	9.08821e-13	0.908821				7.77824	4.79981e-12	4.79981
				2.22256	2.79829e-12								-7.7752	6.77555e-13	0.677555				7.77592	2.13072e-12	2.13072
				2.22488	3.35142e-12								-7.77288	-1.19045e-12	-1.19045				7.7736	8.13453e-13	0.813453
				2.2272	2.91511e-12								-7.77056	-1.36569e-12	-1.36569				7.77128	4.43904e-13	0.443904
				2.22952	1.84223e-12								-7.76824	-1.88425e-12	-1.88425				7.76896	2.23367e-13	0.223367
				2.23184	2.2845e-12								-7.76592	-4.00097e-13	-0.400097				7.76664	2.23204e-12	2.23204
				2.23416	1.87203e-12								-7.7636	-7.9468e-13	-0.79468				7.76432	2.76729e-12	2.76729
				2.23648	1.79097e-12								-7.76128	-1.56716e-12	-1.56716				7.762	1.26764e-12	1.26764
				2.2388	2.5396e-12								-7.75896	-2.66583e-13	-0.266583				7.75968	4.91588e-13	0.491588
				2.24112	3.54573e-12								-7.75664	-5.63414e-13	-0.563414				7.75736	-7.67262e-13	-0.767262
				2.24344	8.55176e-13								-7.75432	-6.56397e-13	-0.656397				7.75504	1.88991e-12	1.88991
				2.24576	6.64442e-13								-7.752	-1.61126e-12	-1.61126				7.75272	2.52053e-12	2.52053
				2.24808	2.25469e-12								-7.74968	-1.68517e-12	-1.68517				7.7504	2.55033e-12	2.55033
				2.2504	2.00793e-12								-7.74736	4.57017e-13	0.457017				7.74808	3.67328e-12	3.67328
				2.25272	1.53705e-12								-7.74504	6.20334e-13	0.620334				7.74576	9.72002e-13	0.972002
				2.25504	1.62527e-12								-7.74272	2.60322e-13	0.260322				7.74344	5.83379e-13	0.583379
				2.25736	1.24499e-12								-7.7404	8.13453e-13	0.813453				7.74112	1.18062e-12	1.18062
				2.25968	3.2334e-12								-7.73808	-2.66583e-13	-0.266583				7.7388	1.1079e-12	1.1079
				2.262	1.09479e-12								-7.73576	-8.50708e-13	-0.850708				7.73648	3.53381e-12	3.53381
				2.26432	4.52249e-13								-7.73344	-7.32691e-13	-0.732691				7.73416	4.43503e-12	4.43503
				2.26664	1.71587e-12								-7.73112	-2.55421e-12	-2.55421				7.73184	3.62083e-12	3.62083
				2.26896	1.48341e-12								-7.7288	-4.35904e-12	-4.35904				7.72952	3.20837e-12	3.20837
				2.27128	1.45242e-12								-7.72648	-1.56954e-12	-1.56954				7.7272	4.31821e-12	4.31821
				2.2736	2.48715e-12								-7.72416	-2.1334e-12	-2.1334				7.72488	3.1726e-12	3.1726
				2.27592	2.10687e-12								-7.72184	-1.05932e-12	-1.05932				7.72256	2.43708e-12	2.43708
				2.27824	5.28543e-13								-7.71952	-1.48371e-12	-1.48371				7.72024	4.59e-12	4.59
				2.28056	1.14128e-12								-7.7172	9.44583e-13	0.944583				7.71792	4.42192e-12	4.42192
				2.28288	2.36675e-12								-7.71488	-2.35589e-13	-0.235589				7.7156	5.62951e-12	5.62951
				2.2852	2.46331e-12								-7.71256	-1.7257e-12	-1.7257				7.71328	4.68775e-12	4.68775
				2.28752	2.27138e-12								-7.71024	-5.90832e-13	-0.590832				7.71096	3.2942e-12	3.2942
				2.28984	1.09717e-12								-7.70792	-2.05786e-13	-0.205786				7.70864	2.51099e-12	2.51099
				2.29216	2.9628e-12								-7.7056	-2.95594e-12	-2.95594				7.70632	2.62543e-12	2.62543
				2.29448	2.92465e-12								-7.70328	-1.83895e-12	-1.83895				7.704	3.05101e-12	3.05101
				2.2968	1.1687e-12								-7.70096	-2.20373e-12	-2.20373				7.70168	2.36317e-12	2.36317
				2.29912	1.91256e-12								-7.69864	-5.52685e-13	-0.552685				7.69936	2.71961e-12	2.71961
				2.30144	1.54182e-12								-7.69632	9.35047e-13	0.935047				7.69704	1.95905e-12	1.95905
				2.30376	9.17165e-13								-7.694	-2.11671e-12	-2.11671				7.69472	1.45122e-12	1.45122
				2.30608	2.39417e-12								-7.69168	-4.89504e-13	-0.489504				7.6924	8.65905e-13	0.865905
				2.3084	1.72107e-13								-7.68936	1.65626e-12	1.65626				7.69008	3.91409e-12	3.91409
				2.31072	1.23307e-12								-7.68704	-4.25131e-13	-0.425131				7.68776	2.19986e-12	2.19986
				2.31304	2.38463e-12								-7.68472	-1.16304e-12	-1.16304				7.68544	2.98469e-13	0.298469
				2.31536	1.56566e-12								-7.6824	8.15082e-14	0.0815082				7.68312	2.67669e-12	2.67669
				2.31768	2.99021e-12								-7.68008	9.55312e-13	0.955312				7.6808	1.16989e-12	1.16989
				2.32	3.25367e-12								-7.67776	-1.6053e-12	-1.6053				7.67848	3.45632e-12	3.45632
				2.32232	4.30986e-12								-7.67544	-1.66133e-12	-1.66133				7.67616	4.39927e-12	4.39927
				2.32464	3.00214e-12								-7.67312	-9.2581e-13	-0.92581				7.67384	3.6101e-12	3.6101
				2.32696	3.50401e-12								-7.6708	-5.51493e-13	-0.551493				7.67152	2.60517e-12	2.60517
				2.32928	2.84001e-12								-7.66848	-2.57209e-12	-2.57209				7.6692	1.32844e-12	1.32844
				2.3316	4.24787e-12								-7.66616	-2.646e-12	-2.646				7.66688	3.37407e-12	3.37407
				2.33392	2.38821e-12								-7.66384	9.26702e-13	0.926702				7.66456	4.32059e-12	4.32059
				2.33624	2.89604e-12								-7.66152	2.06678e-13	0.206678				7.66224	4.05952e-12	4.05952
				2.33856	2.51338e-12								-7.6592	-6.44476e-13	-0.644476				7.65992	4.35397e-12	4.35397
				2.34088	2.86266e-12								-7.65688	-3.03538e-13	-0.303538				7.6576	3.60533e-12	3.60533
				2.3432	5.54249e-12								-7.65456	-5.78911e-13	-0.578911				7.65528	1.64792e-12	1.64792
				2.34552	1.46195e-12								-7.65224	7.63385e-13	0.763385				7.65296	2.7053e-12	2.7053
				2.34784	1.95667e-12								-7.64992	6.50136e-13	0.650136				7.65064	2.27019e-12	2.27019
				2.35016	2.09018e-12								-7.6476	-3.22611e-13	-0.322611				7.64832	3.0069e-12	3.0069
				2.35248	4.63292e-12								-7.64528	-4.01289e-13	-0.401289				7.646	6.6325e-13	0.66325
				2.3548	1.3046e-12								-7.64296	-1.93831e-15	-0.00193831				7.64368	7.93188e-13	0.793188
				2.35712	-4.16787e-13								-7.64064	4.68938e-13	0.468938				7.64136	2.00316e-12	2.00316
				2.35944	-2.92809e-13								-7.63832	2.00717e-13	0.200717				7.63904	1.60381e-12	1.60381
				2.36176	6.33447e-13								-7.636	3.59266e-13	0.359266				7.63672	1.76355e-12	1.76355
				2.36408	-8.12561e-13								-7.63368	-1.29297e-12	-1.29297				7.6344	2.28211e-12	2.28211
				2.3664	6.72031e-14								-7.63136	4.83243e-13	0.483243				7.63208	2.13548e-12	2.13548
				2.36872	4.00945e-12								-7.62904	1.32844e-12	1.32844				7.62976	2.64689e-12	2.64689
				2.37104	1.22711e-12								-7.62672	4.60594e-13	0.460594				7.62744	3.17618e-12	3.17618
				2.37336	1.21757e-12								-7.6244	-8.20906e-13	-0.820906				7.62512	3.80203e-12	3.80203
				2.37568	2.10449e-12								-7.62208	-7.9468e-13	-0.79468				7.6228	2.79829e-12	2.79829
				2.378	4.26814e-12								-7.61976	7.99148e-13	0.799148				7.62048	2.43351e-12	2.43351
				2.38032	3.14519e-12								-7.61744	5.01125e-13	0.501125				7.61816	1.19492e-12	1.19492
				2.38264	4.20138e-12								-7.61512	-4.94273e-13	-0.494273				7.61584	2.92823e-12	2.92823
				2.38496	3.01763e-12								-7.6128	-2.17036e-12	-2.17036				7.61352	4.53636e-12	4.53636
				2.38728	4.32178e-12								-7.61048	1.43453e-12	1.43453				7.6112	3.1738e-12	3.1738
				2.3896	3.34069e-12								-7.60816	1.5001e-12	1.5001				7.60888	4.8022e-12	4.8022
				2.39192	3.85687e-12								-7.60584	7.58617e-13	0.758617				7.60656	4.23357e-12	4.23357
				2.39424	3.49447e-12								-7.60352	1.18658e-12	1.18658				7.60424	2.34052e-12	2.34052
				2.39656	4.79027e-12								-7.6012	-7.73222e-13	-0.773222				7.60192	1.9972e-12	1.9972
				2.39888	2.87458e-12								-7.59888	-4.68047e-13	-0.468047				7.5996	2.22012e-12	2.22012
				2.4012	1.92568e-12								-7.59656	-6.30171e-13	-0.630171				7.59728	2.45973e-12	2.45973
				2.40352	2.75418e-12								-7.59424	-1.44914e-12	-1.44914				7.59496	2.06992e-12	2.06992
				2.40584	3.51474e-12								-7.59192	-2.16515e-13	-0.216515				7.59264	1.61096e-12	1.61096
				2.40816	2.67789e-12								-7.5896	4.3556e-13	0.43556				7.59032	1.43334e-12	1.43334
				2.41048	1.83985e-12								-7.58728	-4.27515e-13	-0.427515				7.588	1.60023e-12	1.60023
				2.4128	2.68742e-12								-7.58496	-1.23695e-12	-1.23695				7.58568	4.13462e-12	4.13462
				2.41512	2.27138e-12								-7.58264	-1.45629e-12	-1.45629				7.58336	3.59461e-12	3.59461
				2.41744	1.99124e-12								-7.58032	5.77419e-13	0.577419				7.58104	2.98902e-12	2.98902
				2.41976	1.54659e-12								-7.578	7.37159e-13	0.737159				7.57872	1.50964e-12	1.50964
				2.42208	2.8424e-12								-7.57568	-1.96249e-13	-0.196249				7.5764	3.39553e-12	3.39553
				2.4244	1.3797e-12								-7.57336	7.69346e-13	0.769346				7.57408	2.65524e-12	2.65524
				2.42672	2.33933e-12								-7.57104	7.7173e-13	0.77173				7.57176	7.69346e-13	0.769346
				2.42904	2.23443e-12								-7.56872	-1.09866e-12	-1.09866				7.56944	3.21433e-12	3.21433
				2.43136	4.78074e-12								-7.5664	-5.94408e-13	-0.594408				7.56712	2.20939e-12	2.20939
				2.43368	2.88054e-12								-7.56408	-1.11655e-12	-1.11655				7.5648	2.04608e-12	2.04608
				2.436	1.87918e-12								-7.56176	9.72002e-13	0.972002				7.56248	2.57417e-12	2.57417
				2.43832	1.04472e-12								-7.55944	5.55961e-13	0.555961				7.56016	2.12952e-12	2.12952
				2.44064	5.09664e-12								-7.55712	-2.80888e-13	-0.280888				7.55784	-1.14158e-12	-1.14158
				2.44296	3.1583e-12								-7.5548	-4.09634e-13	-0.409634				7.55552	1.44689e-13	0.144689
				2.44528	2.53722e-12								-7.55248	1.73256e-12	1.73256				7.5532	3.31327e-12	3.31327
				2.4476	3.87952e-12								-7.55016	-1.86756e-12	-1.86756				7.55088	1.57639e-12	1.57639
				2.44992	3.62918e-12								-7.54784	-2.79024e-12	-2.79024				7.54856	1.34751e-12	1.34751
				2.45224	9.94651e-13								-7.54552	-1.0629e-12	-1.0629				7.54624	1.58116e-12	1.58116
				2.45456	1.91256e-12								-7.5432	-1.05336e-12	-1.05336				7.54392	2.21178e-12	2.21178
				2.45688	2.70411e-12								-7.54088	-1.06767e-12	-1.06767				7.5416	2.88054e-12	2.88054
				2.4592	1.87442e-12								-7.53856	-1.45629e-12	-1.45629				7.53928	1.25214e-12	1.25214
				2.46152	2.21655e-12								-7.53624	-1.1535e-12	-1.1535				7.53696	3.26082e-12	3.26082
				2.46384	3.5569e-13								-7.53392	-2.49937e-12	-2.49937				7.53464	2.16767e-12	2.16767
				2.46616	1.24499e-12								-7.5316	-5.02617e-13	-0.502617				7.53232	-2.36781e-13	-0.236781
				2.46848	8.02724e-13								-7.52928	9.81975e-14	0.0981975				7.53	2.22251e-12	2.22251
				2.4708	1.22592e-12								-7.52696	-9.80647e-13	-0.980647				7.52768	-1.08035e-13	-0.108035
				2.47312	-4.93081e-13								-7.52464	-1.48848e-12	-1.48848				7.52536	4.49865e-13	0.449865
				2.47544	3.83183e-12								-7.52232	-1.71215e-13	-0.171215				7.52304	2.97591e-12	2.97591
				2.47776	3.6256e-12								-7.52	-9.83031e-13	-0.983031				7.52072	2.52768e-12	2.52768
				2.48008	2.76491e-12								-7.51768	4.82051e-13	0.482051				7.5184	1.98766e-12	1.98766
				2.4824	1.81958e-12								-7.51536	6.99012e-13	0.699012				7.51608	3.76508e-12	3.76508
				2.48472	1.7409e-12								-7.51304	-1.52663e-12	-1.52663				7.51376	1.52752e-12	1.52752
				2.48704	2.69458e-12								-7.51072	-3.18363e-12	-3.18363				7.51144	9.74386e-13	0.974386
				2.48936	3.26797e-12								-7.5084	-1.87905e-13	-0.187905				7.50912	1.82435e-12	1.82435
				2.49168	7.39543e-13								-7.50608	-8.6859e-13	-0.86859				7.5068	3.35857e-12	3.35857
				2.494	1.54659e-12								-7.50376	-3.52934e-12	-3.52934				7.50448	3.36811e-12	3.36811
				2.49632	2.20224e-12								-7.50144	-9.00776e-13	-0.900776				7.50216	1.48818e-12	1.48818
				2.49864	1.55613e-12								-7.49912	-8.48324e-13	-0.848324				7.49984	1.80766e-12	1.80766
				2.50096	2.13429e-12								-7.4968	-6.2735e-14	-0.062735				7.49752	7.87227e-13	0.787227
				2.50328	2.42993e-12								-7.49448	-5.55825e-14	-0.0555825				7.4952	9.67233e-13	0.967233
				2.5056	1.81004e-12								-7.49216	-4.38244e-13	-0.438244				7.49288	-2.06978e-13	-0.206978
				2.50792	3.6165e-13								-7.48984	-7.70402e-14	-0.0770402				7.49056	2.81021e-12	2.81021
				2.51024	2.80782e-12								-7.48752	-7.76799e-13	-0.776799				7.48824	3.49328e-12	3.49328
				2.51256	5.54769e-13								-7.4852	8.08685e-13	0.808685				7.48592	8.17029e-13	0.817029
				2.51488	1.29267e-12								-7.48288	-8.57861e-13	-0.857861				7.4836	2.80663e-12	2.80663
				2.5172	9.55312e-13								-7.48056	-6.06329e-13	-0.606329				7.48128	1.2736e-12	1.2736
				2.51952	2.68385e-12								-7.47824	-5.51493e-13	-0.551493				7.47896	1.08926e-13	0.108926
				2.52184	2.6004e-12								-7.47592	-8.60245e-13	-0.860245				7.47664	-8.6859e-13	-0.86859
				2.52416	1.58712e-12								-7.4736	-2.89157e-12	-2.89157				7.47432	3.95029e-13	0.395029
				2.52648	1.06856e-12								-7.47128	1.14605e-12	1.14605				7.472	6.87091e-13	0.687091
				2.5288	1.72779e-12								-7.46896	9.3147e-13	0.93147				7.46968	5.33311e-13	0.533311
				2.53112	1.41427e-12								-7.46664	8.43256e-13	0.843256				7.46736	1.61573e-12	1.61573
				2.53344	7.30007e-13								-7.46432	4.43904e-13	0.443904				7.46504	3.51712e-12	3.51712
				2.53576	1.72064e-12								-7.462	2.25946e-12	2.25946				7.46272	3.03194e-12	3.03194
				2.53808	3.94389e-12								-7.45968	1.23231e-13	0.123231				7.4604	3.28271e-13	0.328271
				2.5404	4.76763e-12								-7.45736	4.71323e-13	0.471323				7.45808	2.1033e-12	2.1033
				2.54272	2.68742e-12								-7.45504	-8.55477e-13	-0.855477				7.45576	1.55255e-12	1.55255
				2.54504	4.45172e-12								-7.45272	1.90422e-12	1.90422				7.45344	2.01866e-12	2.01866
				2.54736	9.13589e-13								-7.4504	2.4955e-12	2.4955				7.45112	3.70547e-12	3.70547
				2.54968	5.42848e-13								-7.44808	2.5913e-13	0.25913				7.4488	1.8613e-12	1.8613
				2.552	2.33099e-12								-7.44576	7.96764e-13	0.796764				7.44648	-4.77583e-13	-0.477583
				2.55432	2.56583e-12								-7.44344	8.73058e-13	0.873058				7.44416	1.29506e-12	1.29506
				2.55664	1.89707e-12								-7.44112	1.14724e-12	1.14724				7.44184	2.13191e-12	2.13191
				2.55896	2.66477e-12								-7.4388	1.57802e-13	0.157802				7.43952	1.79097e-12	1.79097
				2.56128	1.9376e-12								-7.43648	-4.77583e-13	-0.477583				7.4372	-1.736e-13	-0.1736
				2.5636	1.9519e-12								-7.43416	-1.23532e-13	-0.123532				7.43488	4.49865e-13	0.449865
				2.56592	3.01048e-12								-7.43184	-3.16651e-13	-0.316651				7.43256	3.08006e-13	0.308006
				2.56824	2.55987e-12								-7.42952	-8.06601e-13	-0.806601				7.43024	2.85074e-12	2.85074
				2.57056	2.21893e-12								-7.4272	2.8774e-13	0.28774				7.42792	3.16068e-12	3.16068
				2.57288	1.96501e-12								-7.42488	1.26808e-13	0.126808				7.4256	2.27377e-12	2.27377
				2.5752	2.04608e-12								-7.42256	-2.57447e-12	-2.57447				7.42328	1.4393e-12	1.4393
				2.57752	1.1234e-12								-7.42024	-1.11893e-12	-1.11893				7.42096	1.40831e-12	1.40831
				2.57984	3.29658e-12								-7.41792	-4.54934e-13	-0.454934				7.41864	3.09631e-12	3.09631
				2.58216	2.58252e-12								-7.4156	-2.42308e-12	-2.42308				7.41632	2.75819e-13	0.275819
				2.58448	5.04701e-13								-7.41328	-5.41956e-13	-0.541956				7.414	1.5609e-12	1.5609
				2.5868	-6.58781e-13								-7.41096	8.58753e-13	0.858753				7.41168	1.30817e-12	1.30817
				2.58912	1.04591e-12								-7.40864	9.56504e-13	0.956504				7.40936	1.67057e-12	1.67057
				2.59144	2.90124e-13								-7.40632	-1.88306e-12	-1.88306				7.40704	1.69918e-12	1.69918
				2.59376	1.31532e-12								-7.404	-5.14538e-13	-0.514538				7.40472	7.90803e-13	0.790803
				2.59608	1.49295e-12								-7.40168	9.10013e-13	0.910013				7.4024	6.9782e-13	0.69782
				2.5984	1.38089e-12								-7.39936	-1.41413e-13	-0.141413				7.40008	1.13293e-12	1.13293
				2.60072	3.10823e-12								-7.39704	-3.58374e-13	-0.358374				7.39776	1.20208e-12	1.20208
				2.60304	3.70309e-12								-7.39472	-6.33748e-13	-0.633748				7.39544	1.94475e-12	1.94475
				2.60536	4.91783e-12								-7.3924	-2.43381e-12	-2.43381				7.39312	3.08797e-12	3.08797
				2.60768	1.64196e-12								-7.39008	-1.79485e-12	-1.79485				7.3908	3.13803e-12	3.13803
				2.61	8.05109e-13								-7.38776	-8.56669e-13	-0.856669				7.38848	3.324e-12	3.324
				2.61232	2.91869e-12								-7.38544	1.0781e-12	1.0781				7.38616	1.70395e-12	1.70395
				2.61464	2.53722e-12								-7.38312	2.56746e-13	0.256746				7.38384	2.18198e-12	2.18198
				2.61696	4.2288e-12								-7.3808	-3.45261e-13	-0.345261				7.38152	2.21655e-12	2.21655
				2.61928	2.18913e-12								-7.37848	-1.48013e-12	-1.48013				7.3792	5.08277e-13	0.508277
				2.6216	-6.21827e-13								-7.37616	-7.62494e-13	-0.762494				7.37688	2.26661e-12	2.26661
				2.62392	5.4404e-13								-7.37384	-1.83418e-12	-1.83418				7.37456	2.5396e-12	2.5396
				2.62624	-1.09986e-12								-7.37152	2.54362e-13	0.254362				7.37224	1.8923e-12	1.8923
				2.62856	2.26542e-12								-7.3692	7.13317e-13	0.713317				7.36992	3.25963e-12	3.25963
				2.63088	2.31311e-12								-7.36688	-2.5347e-13	-0.25347				7.3676	2.08542e-12	2.08542
				2.6332	2.72676e-12								-7.36456	-1.31801e-12	-1.31801				7.36528	1.86249e-12	1.86249
				2.63552	2.78041e-12								-7.36224	-3.01154e-13	-0.301154				7.36296	1.29625e-12	1.29625
				2.63784	6.82323e-13								-7.35992	-1.55643e-12	-1.55643				7.36064	3.12373e-12	3.12373
				2.64016	1.45003e-12								-7.3576	-1.28225e-12	-1.28225				7.35832	4.30271e-12	4.30271
				2.64248	4.02138e-12								-7.35528	-1.59295e-13	-0.159295				7.356	5.23373e-12	5.23373
				2.6448	3.22625e-12								-7.35296	-2.20493e-12	-2.20493				7.35368	2.59086e-12	2.59086
				2.64712	2.58729e-12								-7.35064	-8.98392e-13	-0.898392				7.35136	2.13548e-12	2.13548
				2.64944	2.16886e-12								-7.34832	-1.76385e-12	-1.76385				7.34904	2.27734e-12	2.27734
				2.65176	-3.13075e-13								-7.346	-1.63391e-12	-1.63391				7.34672	2.7971e-12	2.7971
				2.65408	4.8682e-13								-7.34368	-9.79454e-13	-0.979454				7.3444	3.52904e-12	3.52904
				2.6564	8.15837e-13								-7.34136	-2.71351e-13	-0.271351				7.34208	2.77683e-12	2.77683
				2.65872	2.23085e-12								-7.33904	-9.41307e-13	-0.941307				7.33976	2.15694e-12	2.15694
				2.66104	1.75759e-12								-7.33672	-6.13482e-13	-0.613482				7.33744	3.95029e-13	0.395029
				2.66336	2.53722e-12								-7.3344	9.17165e-13	0.917165				7.33512	1.11148e-12	1.11148
				2.66568	4.12866e-12								-7.33208	8.14645e-13	0.814645				7.3328	1.17704e-12	1.17704
				2.668	3.38361e-12								-7.32976	-3.34532e-13	-0.334532				7.33048	-1.59295e-13	-0.159295
				2.67032	4.29794e-12								-7.32744	-1.69352e-12	-1.69352				7.32816	1.75282e-12	1.75282
				2.67264	3.8974e-12								-7.32512	-3.39583e-12	-3.39583				7.32584	3.0987e-12	3.0987
				2.67496	3.9117e-12								-7.3228	1.01774e-13	0.101774				7.32352	2.1939e-12	2.1939
				2.67728	4.6663e-12								-7.32048	1.52513e-12	1.52513				7.3212	3.65183e-12	3.65183
				2.6796	3.29658e-12								-7.31816	-1.05098e-12	-1.05098				7.31888	5.17532e-12	5.17532
				2.68192	3.84614e-12								-7.31584	3.05622e-13	0.305622				7.31656	2.90319e-12	2.90319
				2.68424	3.38003e-12								-7.31352	-1.99273e-12	-1.99273				7.31424	1.14128e-12	1.14128
				2.68656	2.25589e-12								-7.3112	-2.48507e-12	-2.48507				7.31192	2.89842e-12	2.89842
				2.68888	2.76253e-12								-7.30888	-1.05456e-12	-1.05456				7.3096	3.63037e-12	3.63037
				2.6912	4.8773e-12								-7.30656	7.31635e-14	0.0731635				7.30728	3.3693e-12	3.3693
				2.69352	2.91869e-12								-7.30424	-1.65255e-13	-0.165255				7.30496	3.38599e-12	3.38599
				2.69584	2.80782e-12								-7.30192	-1.21787e-12	-1.21787				7.30264	1.37493e-12	1.37493
				2.69816	3.94866e-12								-7.2996	-1.3037e-12	-1.3037				7.30032	1.49295e-12	1.49295
				2.70048	3.51712e-12								-7.29728	-2.28956e-12	-2.28956				7.298	2.88173e-12	2.88173
				2.7028	4.35039e-12								-7.29496	-1.22503e-12	-1.22503				7.29568	3.55884e-12	3.55884
				2.70512	2.19032e-12								-7.29264	-4.56126e-13	-0.456126				7.29336	4.95164e-13	0.495164
				2.70744	2.7065e-12								-7.29032	-2.30745e-12	-2.30745				7.29104	9.77962e-13	0.977962
				2.70976	3.35738e-12								-7.288	-1.28105e-12	-1.28105				7.28872	1.37493e-12	1.37493
				2.71208	2.28211e-12								-7.28568	1.74805e-12	1.74805				7.2864	-5.91588e-14	-0.0591588
				2.7144	5.7964e-12								-7.28336	-1.65255e-13	-0.165255				7.28408	1.55851e-12	1.55851
				2.71672	4.49344e-12								-7.28104	-5.86064e-13	-0.586064				7.28176	1.5661e-13	0.15661
				2.71904	3.17618e-12								-7.27872	-1.99035e-12	-1.99035				7.27944	2.74226e-12	2.74226
				2.72136	3.96535e-12								-7.2764	6.12426e-14	0.0612426				7.27712	1.44765e-12	1.44765
				2.72368	2.33218e-12								-7.27408	4.33176e-13	0.433176				7.2748	1.09956e-12	1.09956
				2.726	3.40864e-12								-7.27176	-5.43904e-14	-0.0543904				7.27248	1.32963e-12	1.32963
				2.72832	2.55987e-12								-7.26944	-5.01425e-13	-0.501425				7.27016	3.52113e-13	0.352113
				2.73064	2.09376e-12								-7.26712	-8.99584e-13	-0.899584				7.26784	4.67746e-13	0.467746
				2.73296	1.65745e-12								-7.2648	-3.14267e-13	-0.314267				7.26552	1.24141e-12	1.24141
				2.73528	2.38463e-12								-7.26248	-1.25006e-12	-1.25006				7.2632	1.14887e-13	0.114887
				2.7376	3.30135e-12								-7.26016	-3.6195e-13	-0.36195				7.26088	3.55407e-12	3.55407
				2.73992	3.04386e-12								-7.25784	-1.60292e-12	-1.60292				7.25856	1.49295e-12	1.49295
				2.74224	3.96892e-12								-7.25552	-2.09645e-12	-2.09645				7.25624	2.40371e-12	2.40371
				2.74456	2.51457e-12								-7.2532	-1.40146e-12	-1.40146				7.25392	1.05187e-12	1.05187
				2.74688	2.20939e-12								-7.25088	-1.54331e-12	-1.54331				7.2516	2.28807e-12	2.28807
				2.7492	2.53245e-12								-7.24856	-9.12697e-13	-0.912697				7.24928	2.99021e-12	2.99021
				2.75152	2.10926e-12								-7.24624	-1.65179e-12	-1.65179				7.24696	3.91528e-12	3.91528
				2.75384	3.54573e-12								-7.24392	4.26023e-13	0.426023				7.24464	3.33711e-12	3.33711
				2.75616	2.36079e-12								-7.2416	1.17108e-12	1.17108				7.24232	1.78382e-12	1.78382
				2.75848	2.76133e-12								-7.23928	-8.89611e-14	-0.0889611				7.24	1.27002e-12	1.27002
				2.7608	1.99959e-12								-7.23696	-1.49444e-12	-1.49444				7.23768	1.57639e-12	1.57639
				2.76312	2.09376e-12								-7.23464	-2.03803e-12	-2.03803				7.23536	3.97608e-12	3.97608
				2.76544	1.4846e-12								-7.23232	-2.33129e-12	-2.33129				7.23304	1.91852e-12	1.91852
				2.76776	1.23069e-12								-7.23	-1.7412e-12	-1.7412				7.23072	2.14264e-12	2.14264
				2.77008	1.96144e-12								-7.22768	-5.57454e-13	-0.557454				7.2284	1.84581e-12	1.84581
				2.7724	4.67822e-12								-7.22536	-1.67087e-12	-1.67087				7.22608	2.27496e-12	2.27496
				2.77472	4.77239e-12								-7.22304	-2.55659e-12	-2.55659				7.22376	2.16886e-12	2.16886
				2.77704	1.90303e-12								-7.22072	-5.12154e-13	-0.512154				7.22144	-1.18763e-13	-0.118763
				2.77936	7.59809e-13								-7.2184	-5.31228e-13	-0.531228				7.21912	1.77786e-12	1.77786
				2.78168	-9.35347e-13								-7.21608	-1.4849e-12	-1.4849				7.2168	2.73868e-12	2.73868
				2.784	-1.0784e-12								-7.21376	2.94893e-13	0.294893				7.21448	3.53142e-12	3.53142
				2.78632	1.87322e-12								-7.21144	3.75955e-13	0.375955				7.21216	4.49865e-13	0.449865
				2.78864	2.95207e-12								-7.20912	-2.1489e-12	-2.1489				7.20984	8.8021e-13	0.88021
				2.79096	2.5396e-12								-7.2068	-9.44884e-13	-0.944884				7.20752	1.3499e-12	1.3499
				2.79328	2.18794e-12								-7.20448	-2.77312e-13	-0.277312				7.2052	2.04489e-12	2.04489
				2.7956	3.21314e-12								-7.20216	1.44765e-12	1.44765				7.20288	2.43828e-12	2.43828
				2.79792	3.91886e-12								-7.19984	2.43232e-12	2.43232				7.20056	1.55017e-12	1.55017
				2.80024	4.19065e-12								-7.19752	-1.00449e-12	-1.00449				7.19824	2.33695e-12	2.33695
				2.80256	3.52546e-12								-7.1952	-1.87905e-13	-0.187905				7.19592	-5.62222e-13	-0.562222
				2.80488	1.88395e-12								-7.19288	-1.14039e-12	-1.14039				7.1936	1.6801e-12	1.6801
				2.8072	3.777e-12								-7.19056	-2.48702e-13	-0.248702				7.19128	3.86879e-12	3.86879
				2.80952	3.36096e-12								-7.18824	1.3499e-12	1.3499				7.18896	2.1331e-12	2.1331
				2.81184	2.96041e-12								-7.18592	6.13182e-13	0.613182				7.18664	-3.23803e-13	-0.323803
				2.81416	1.84104e-12								-7.1836	-8.96008e-13	-0.896008				7.18432	1.13174e-12	1.13174
				2.81648	3.62083e-12								-7.18128	-1.55643e-12	-1.55643				7.182	2.17602e-12	2.17602
				2.8188	2.66358e-12								-7.17896	-9.37731e-13	-0.937731				7.17968	3.52308e-12	3.52308
				2.82112	3.54811e-12								-7.17664	-3.1069e-13	-0.31069				7.17736	2.691e-12	2.691
				2.82344	4.47437e-12								-7.17432	6.48189e-14	0.0648189				7.17504	1.70156e-12	1.70156
				2.82576	2.2237e-12								-7.172	-2.56732e-12	-2.56732				7.17272	1.51202e-12	1.51202
				2.82808	2.56464e-12								-7.16968	-1.10582e-12	-1.10582				7.1704	2.15023e-13	0.215023
				2.8304	3.48493e-12								-7.16736	2.72243e-13	0.272243				7.16808	1.12817e-12	1.12817
				2.83272	2.50146e-12								-7.16504	2.62706e-13	0.262706				7.16576	-5.3838e-13	-0.53838
				2.83504	2.96518e-12								-7.16272	-9.31771e-13	-0.931771				7.16344	1.38327e-12	1.38327
				2.83736	1.94833e-12								-7.1604	-1.138e-12	-1.138				7.16112	2.02343e-12	2.02343
				2.83968	2.10091e-12								-7.15808	-7.55341e-13	-0.755341				7.1588	2.39774e-12	2.39774
				2.842	3.20837e-12								-7.15576	-3.3334e-13	-0.33334				7.15648	2.98187e-12	2.98187
				2.84432	3.99634e-12								-7.15344	6.04837e-13	0.604837				7.15416	1.89826e-12	1.89826
				2.84664	6.1135e-12								-7.15112	6.78747e-13	0.678747				7.15184	6.22718e-13	0.622718
				2.84896	3.1726e-12								-7.1488	-1.40742e-12	-1.40742				7.14952	-9.92567e-13	-0.992567
				2.85128	2.85193e-12								-7.14648	2.25751e-13	0.225751				7.1472	2.92227e-12	2.92227
				2.8536	2.14025e-12								-7.14416	-1.55881e-12	-1.55881				7.14488	2.64451e-12	2.64451
				2.85592	1.23665e-12								-7.14184	-2.01658e-12	-2.01658				7.14256	1.7266e-12	1.7266
				2.85824	2.66239e-12								-7.13952	4.57454e-14	0.0457454				7.14024	1.50368e-12	1.50368
				2.86056	3.21552e-12								-7.1372	-5.53877e-13	-0.553877				7.13792	1.74329e-12	1.74329
				2.86288	2.79352e-12								-7.13488	-1.03667e-12	-1.03667				7.1356	9.32662e-13	0.932662
				2.8652	1.75401e-12								-7.13256	-7.07657e-13	-0.707657				7.13328	2.33218e-12	2.33218
				2.86752	2.55152e-12								-7.13024	1.22115e-12	1.22115				7.13096	3.36616e-13	0.336616
				2.86984	1.32844e-12								-7.12792	8.30142e-13	0.830142				7.12864	1.45003e-12	1.45003
				2.87216	1.24022e-12								-7.1256	1.05187e-12	1.05187				7.12632	2.69219e-12	2.69219
				2.87448	2.81975e-12								-7.12328	-3.14267e-13	-0.314267				7.124	2.34768e-12	2.34768
				2.8768	3.07247e-12								-7.12096	-8.59053e-13	-0.859053				7.12168	1.57639e-12	1.57639
				2.87912	2.88412e-12								-7.11864	-1.4098e-12	-1.4098				7.11936	1.46791e-12	1.46791
				2.88144	1.71468e-12								-7.11632	3.83108e-13	0.383108				7.11704	2.68265e-12	2.68265
				2.88376	2.35125e-12								-7.114	-4.69239e-13	-0.469239				7.11472	1.87322e-12	1.87322
				2.88608	1.58355e-12								-7.11168	-1.24529e-12	-1.24529				7.1124	2.00674e-12	2.00674
				2.8884	1.9674e-12								-7.10936	1.26808e-13	0.126808				7.11008	2.96876e-12	2.96876
				2.89072	4.36752e-13								-7.10704	-1.60888e-12	-1.60888				7.10776	1.81839e-12	1.81839
				2.89304	2.78041e-12								-7.10472	-2.69726e-12	-2.69726				7.10544	2.16767e-12	2.16767
				2.89536	2.54914e-12								-7.1024	-1.40622e-12	-1.40622				7.10312	7.1451e-13	0.71451
				2.89768	1.10313e-12								-7.10008	-2.29672e-12	-2.29672				7.1008	2.42397e-12	2.42397
				2.9	2.10091e-12								-7.09776	-1.83895e-12	-1.83895				7.09848	5.50001e-13	0.550001
				2.90232	3.42414e-12								-7.09544	-2.18466e-12	-2.18466				7.09616	1.85177e-12	1.85177
				2.90464	1.23307e-12								-7.09312	-2.74733e-12	-2.74733				7.09384	1.06022e-12	1.06022
				2.90696	1.19254e-12								-7.0908	-2.24903e-12	-2.24903				7.09152	1.7707e-12	1.7707
				2.90928	1.55255e-12								-7.08848	-9.41307e-13	-0.941307				7.0892	2.25946e-12	2.25946
				2.9116	2.17407e-13								-7.08616	-7.25539e-13	-0.725539				7.08688	2.30834e-12	2.30834
				2.91392	2.36198e-12								-7.08384	-5.90832e-13	-0.590832				7.08456	2.80663e-12	2.80663
				2.91624	2.10926e-12								-7.08152	3.74763e-13	0.374763				7.08224	1.47506e-12	1.47506
				2.91856	6.76363e-13								-7.0792	-2.23668e-13	-0.223668				7.07992	1.80647e-12	1.80647
				2.92088	2.05681e-12								-7.07688	-1.56954e-12	-1.56954				7.0776	2.0282e-12	2.0282
				2.9232	4.32655e-12								-7.07456	-1.86399e-12	-1.86399				7.07528	-7.26731e-13	-0.726731
				2.92552	3.48732e-12								-7.07224	-1.01283e-12	-1.01283				7.07296	8.17029e-13	0.817029
				2.92784	1.77309e-12								-7.06992	-5.72951e-13	-0.572951				7.07064	1.6503e-12	1.6503
				2.93016	8.26566e-13								-7.0676	-8.7455e-13	-0.87455				7.06832	1.79812e-12	1.79812
				2.93248	1.40831e-12								-7.06528	-2.70918e-12	-2.70918				7.066	2.95207e-12	2.95207
				2.9348	3.46228e-12								-7.06296	-1.07125e-12	-1.07125				7.06368	6.7517e-13	0.67517
				2.93712	4.23357e-12								-7.06064	-7.70838e-13	-0.770838				7.06136	-1.90289e-13	-0.190289
				2.93944	3.13088e-12								-7.05832	-1.58146e-12	-1.58146				7.05904	2.40847e-12	2.40847
				2.94176	2.4943e-12								-7.056	1.62765e-12	1.62765				7.05672	2.42159e-12	2.42159
				2.94408	2.84478e-12								-7.05368	-3.47645e-13	-0.347645				7.0544	1.40592e-12	1.40592
				2.9464	3.53381e-12								-7.05136	-1.37837e-13	-0.137837				7.05208	2.72243e-13	0.272243
				2.94872	4.82842e-12								-7.04904	-1.01283e-12	-1.01283				7.04976	2.40057e-13	0.240057
				2.95104	4.21688e-12								-7.04672	-1.32278e-12	-1.32278				7.04744	1.36182e-12	1.36182
				2.95336	2.98545e-12								-7.0444	-1.04144e-12	-1.04144				7.04512	3.85928e-14	0.0385928
				2.95568	3.83779e-12								-7.04208	-1.138e-12	-1.138				7.0428	1.21996e-12	1.21996
				2.958	3.31089e-12								-7.03976	4.29599e-13	0.429599				7.04048	2.18599e-13	0.218599
				2.96032	2.51934e-12								-7.03744	-2.78504e-13	-0.278504				7.03816	2.16648e-12	2.16648
				2.96264	2.84359e-12								-7.03512	1.87604e-13	0.187604				7.03584	2.65524e-12	2.65524
				2.96496	1.08167e-12								-7.0328	1.09479e-12	1.09479				7.03352	2.16767e-12	2.16767
				2.96728	1.56566e-12								-7.03048	-1.10224e-12	-1.10224				7.0312	3.44202e-12	3.44202
				2.9696	2.73391e-12								-7.02816	-1.05336e-12	-1.05336				7.02888	2.03892e-12	2.03892
				2.97192	1.80051e-12								-7.02584	9.13589e-13	0.913589				7.02656	4.16486e-13	0.416486
				2.97424	3.19406e-12								-7.02352	-4.3225e-15	-0.0043225				7.02424	7.61001e-13	0.761001
				2.97656	2.79948e-12								-7.0212	-5.08141e-14	-0.0508141				7.02192	6.71594e-13	0.671594
				2.97888	6.29871e-13								-7.01888	4.54633e-13	0.454633				7.0196	-4.04866e-13	-0.404866
				2.9812	1.44169e-12								-7.01656	-1.52663e-12	-1.52663				7.01728	1.19655e-13	0.119655
				2.98352	1.19612e-12								-7.01424	-1.66729e-12	-1.66729				7.01496	1.10194e-12	1.10194
				2.98584	1.32844e-12								-7.01192	-2.29791e-12	-2.29791				7.01264	1.41546e-12	1.41546
				2.98816	1.32605e-12								-7.0096	-6.07521e-13	-0.607521				7.01032	2.60636e-12	2.60636
				2.99048	3.0832e-12								-7.00728	-1.58861e-12	-1.58861				7.008	5.12168e-12	5.12168
				2.9928	1.38923e-12								-7.00496	-9.37731e-13	-0.937731				7.00568	3.66971e-12	3.66971
				2.99512	6.72786e-13								-7.00264	-2.22475e-13	-0.222475				7.00336	2.74345e-12	2.74345
				2.99744	2.60398e-12								-7.00032	-1.06052e-12	-1.06052				7.00104	1.78143e-12	1.78143
				2.99976	3.46348e-12								-6.998	-3.15459e-13	-0.315459				6.99872	1.98766e-12	1.98766
				3.00208	3.48255e-12								-6.99568	1.01774e-13	0.101774				6.9964	1.83985e-12	1.83985
				3.0044	3.38361e-12								-6.99336	7.1451e-13	0.71451				6.99408	1.29744e-12	1.29744
				3.00672	2.6159e-12								-6.99104	-1.87905e-13	-0.187905				6.99176	1.80408e-12	1.80408
				3.00904	3.05697e-12								-6.98872	1.07691e-12	1.07691				6.98944	-3.53169e-14	-0.0353169
				3.01136	3.32638e-12								-6.9864	5.58345e-13	0.558345				6.98712	5.83379e-13	0.583379
				3.01368	3.25724e-12								-6.98408	4.89204e-13	0.489204				6.9848	1.20446e-12	1.20446
				3.016	2.23562e-12								-6.98176	1.55017e-12	1.55017				6.98248	2.09734e-12	2.09734
				3.01832	2.6457e-12								-6.97944	2.42755e-12	2.42755				6.98016	1.92806e-12	1.92806
				3.02064	3.81634e-12								-6.97712	1.28791e-12	1.28791				6.97784	1.78262e-12	1.78262
				3.02296	1.06141e-12								-6.9748	2.36317e-12	2.36317				6.97552	2.44424e-12	2.44424
				3.02528	2.94611e-12								-6.97248	-1.92673e-13	-0.192673				6.9732	4.77955e-12	4.77955
				3.0276	5.65498e-13								-6.97016	3.9026e-13	0.39026				6.97088	3.50281e-12	3.50281
				3.02992	1.75521e-12								-6.96784	-3.02346e-13	-0.302346				6.96856	2.41682e-12	2.41682
				3.03224	3.01167e-12								-6.96552	-2.88041e-13	-0.288041				6.96624	7.10933e-13	0.710933
				3.03456	3.81276e-12								-6.9632	-1.40026e-12	-1.40026				6.96392	3.56882e-13	0.356882
				3.03688	3.53262e-12								-6.96088	-3.66719e-13	-0.366719				6.9616	2.63139e-12	2.63139
				3.0392	3.4897e-12								-6.95856	9.05244e-13	0.905244				6.95928	1.99482e-12	1.99482
				3.04152	3.44083e-12								-6.95624	-1.85445e-12	-1.85445				6.95696	1.5609e-12	1.5609
				3.04384	3.15592e-12								-6.95392	-1.87905e-13	-0.187905				6.95464	4.32178e-12	4.32178
				3.04616	4.27052e-12								-6.9516	6.21526e-13	0.621526				6.95232	1.36182e-12	1.36182
				3.04848	4.52205e-12								-6.94928	2.18078e-12	2.18078				6.95	9.55312e-13	0.955312
				3.0508	3.69355e-12								-6.94696	-7.25539e-13	-0.725539				6.94768	-1.74355e-14	-0.0174355
				3.05312	2.07469e-12								-6.94464	3.24695e-13	0.324695				6.94536	7.32391e-13	0.732391
				3.05544	1.92568e-12								-6.94232	1.4691e-12	1.4691				6.94304	1.49533e-12	1.49533
				3.05776	3.03909e-12								-6.94	5.79803e-13	0.579803				6.94072	1.19373e-12	1.19373
				3.06008	2.7816e-12								-6.93768	3.68803e-13	0.368803				6.9384	2.6755e-12	2.6755
				3.0624	2.35483e-12								-6.93536	1.38923e-12	1.38923				6.93608	1.88276e-12	1.88276
				3.06472	2.03058e-12								-6.93304	-5.03809e-13	-0.503809				6.93376	2.7971e-12	2.7971
				3.06704	1.40592e-12								-6.93072	-2.0221e-13	-0.20221				6.93144	1.60381e-12	1.60381
				3.06936	2.72557e-12								-6.9284	-6.85007e-13	-0.685007				6.92912	7.93188e-13	0.793188
				3.07168	2.1939e-12								-6.92608	-5.35996e-13	-0.535996				6.9268	5.73843e-13	0.573843
				3.074	3.53262e-12								-6.92376	-4.44205e-13	-0.444205				6.92448	2.91869e-12	2.91869
				3.07632	2.45854e-12								-6.92144	1.17271e-13	0.117271				6.92216	9.5412e-13	0.95412
				3.07864	2.78398e-12								-6.91912	-1.7257e-12	-1.7257				6.91984	1.86488e-12	1.86488
				3.08096	3.49447e-12								-6.9168	8.02724e-13	0.802724				6.91752	1.19731e-12	1.19731
				3.08328	2.66358e-12								-6.91448	2.68667e-13	0.268667				6.9152	8.03916e-13	0.803916
				3.0856	1.73375e-12								-6.91216	1.18539e-12	1.18539				6.91288	-7.34639e-14	-0.0734639
				3.08792	2.59444e-12								-6.90984	-1.36092e-12	-1.36092				6.91056	1.5001e-12	1.5001
				3.09024	3.18572e-12								-6.90752	-1.61484e-12	-1.61484				6.90824	2.72795e-12	2.72795
				3.09256	2.97591e-12								-6.9052	-1.19642e-12	-1.19642				6.90592	2.49669e-12	2.49669
				3.09488	5.91724e-13								-6.90288	-2.0221e-13	-0.20221				6.9036	1.91375e-12	1.91375
				3.0972	1.23307e-12								-6.90056	5.61922e-13	0.561922				6.90128	2.1176e-12	2.1176
				3.09952	2.80306e-12								-6.89824	2.35288e-13	0.235288				6.89896	9.05244e-13	0.905244
				3.10184	3.28943e-12								-6.89592	-8.22098e-13	-0.822098				6.89664	2.01985e-12	2.01985
				3.10416	1.88514e-12								-6.8936	-1.08674e-12	-1.08674				6.89432	2.89842e-12	2.89842
				3.10648	2.98783e-12								-6.89128	-3.1304e-15	-0.0031304				6.892	3.36692e-12	3.36692
				3.1088	2.31787e-12								-6.88896	-5.96793e-13	-0.596793				6.88968	1.45718e-12	1.45718
				3.11112	2.84001e-12								-6.88664	-2.66583e-13	-0.266583				6.88736	1.15797e-12	1.15797
				3.11344	2.50742e-12								-6.88432	1.12936e-12	1.12936				6.88504	1.2593e-12	1.2593
				3.11576	1.97813e-12								-6.882	6.00069e-13	0.600069				6.88272	-9.84978e-14	-0.0984978
				3.11808	-1.49758e-13								-6.87968	1.77428e-12	1.77428				6.8804	2.26542e-12	2.26542
				3.1204	1.73017e-12								-6.87736	-1.43722e-12	-1.43722				6.87808	3.58745e-12	3.58745
				3.12272	1.09598e-12								-6.87504	3.22311e-13	0.322311				6.87576	3.4444e-12	3.4444
				3.12504	6.21526e-13								-6.87272	1.9066e-12	1.9066				6.87344	3.46109e-12	3.46109
				3.12736	1.28552e-12								-6.8704	-3.98905e-13	-0.398905				6.87112	9.62465e-13	0.962465
				3.12968	2.03177e-12								-6.86808	-1.80796e-12	-1.80796				6.8688	1.39996e-12	1.39996
				3.132	3.44083e-12								-6.86576	1.03995e-12	1.03995				6.86648	2.63616e-12	2.63616
				3.13432	3.93316e-12								-6.86344	2.54318e-12	2.54318				6.86416	1.91137e-12	1.91137
				3.13664	1.90303e-12								-6.86112	8.26566e-13	0.826566				6.86184	3.62679e-12	3.62679
				3.13896	3.9725e-12								-6.8588	-8.53848e-14	-0.0853848				6.85952	2.45497e-12	2.45497
				3.14128	3.30374e-12								-6.85648	-5.37188e-13	-0.537188				6.8572	1.11028e-12	1.11028
				3.1436	1.97574e-12								-6.85416	4.04565e-13	0.404565				6.85488	2.05204e-12	2.05204
				3.14592	1.34036e-12								-6.85184	-4.31092e-13	-0.431092				6.85256	3.30254e-12	3.30254
				3.14824	1.20088e-12								-6.84952	1.97574e-12	1.97574				6.85024	2.99498e-12	2.99498
				3.15056	2.7661e-12								-6.8472	-8.49516e-13	-0.849516				6.84792	1.66461e-12	1.66461
				3.15288	1.53109e-12								-6.84488	7.10933e-13	0.710933				6.8456	1.40592e-12	1.40592
				3.1552	1.19731e-12								-6.84256	1.40235e-12	1.40235				6.84328	1.81644e-13	0.181644
				3.15752	1.22234e-12								-6.84024	1.97141e-13	0.197141				6.84096	1.06975e-12	1.06975
				3.15984	2.09018e-12								-6.83792	7.67398e-14	0.0767398				6.83864	3.44917e-12	3.44917
				3.16216	1.59189e-12								-6.8356	1.59427e-12	1.59427				6.83632	1.25572e-12	1.25572
				3.16448	4.04522e-12								-6.83328	5.0947e-13	0.50947				6.834	5.3808e-13	0.53808
				3.1668	4.62338e-12								-6.83096	1.39281e-12	1.39281				6.83168	2.80425e-12	2.80425
				3.16912	4.24072e-12								-6.82864	6.95873e-14	0.0695873				6.82936	2.53722e-12	2.53722
				3.17144	2.14144e-12								-6.82632	-3.29327e-14	-0.0329327				6.82704	4.90396e-13	0.490396
				3.17376	2.56345e-12								-6.824	-1.0176e-12	-1.0176				6.82472	4.05757e-13	0.405757
				3.17608	1.03041e-12								-6.82168	-2.39804e-12	-2.39804				6.8224	1.65626e-12	1.65626
				3.1784	2.87577e-12								-6.81936	5.57153e-13	0.557153				6.82008	1.74448e-12	1.74448
				3.18072	4.0786e-12								-6.81704	-1.64464e-12	-1.64464				6.81776	1.37537e-13	0.137537
				3.18304	2.56821e-12								-6.81472	-1.31205e-12	-1.31205				6.81544	2.8178e-13	0.28178
				3.18536	3.08201e-12								-6.8124	-5.02617e-13	-0.502617				6.81312	1.5609e-12	1.5609
				3.18768	2.76253e-12								-6.81008	1.59431e-14	0.0159431				6.8108	3.56882e-13	0.356882
				3.19	2.36198e-12								-6.80776	-6.03509e-14	-0.0603509				6.80848	3.62087e-14	0.0362087
				3.19232	3.88428e-12								-6.80544	-1.35496e-12	-1.35496				6.80616	2.48954e-12	2.48954
				3.19464	3.03909e-12								-6.80312	5.54769e-13	0.554769				6.80384	2.12476e-12	2.12476
				3.19696	2.21297e-12								-6.8008	1.03637e-12	1.03637				6.80152	1.11744e-12	1.11744
				3.19928	3.55407e-12								-6.79848	1.00896e-12	1.00896				6.7992	1.65269e-12	1.65269
				3.2016	3.04744e-12								-6.79616	-5.70567e-13	-0.570567				6.79688	3.81916e-13	0.381916
				3.20392	1.83865e-12								-6.79384	-2.76521e-12	-2.76521				6.79456	6.79939e-13	0.679939
				3.20624	1.29387e-12								-6.79152	4.15294e-13	0.415294				6.79224	1.20684e-12	1.20684
				3.20856	2.08899e-12								-6.7892	1.13695e-13	0.113695				6.78992	-6.15866e-13	-0.615866
				3.21088	1.69441e-12								-6.78688	1.27956e-12	1.27956				6.7876	1.49295e-12	1.49295
				3.2132	6.81131e-13								-6.78456	-4.72378e-14	-0.0472378				6.78528	6.9186e-13	0.69186
				3.21552	6.13182e-13								-6.78224	7.07794e-14	0.0707794				6.78296	1.85892e-12	1.85892
				3.21784	1.66699e-12								-6.77992	2.19628e-12	2.19628				6.78064	3.21314e-12	3.21314
				3.22016	3.62679e-12								-6.7776	-7.94243e-14	-0.0794243				6.77832	5.24685e-12	5.24685
				3.22248	9.08821e-13								-6.77528	-3.44069e-13	-0.344069				6.776	3.23936e-12	3.23936
				3.2248	2.19628e-12								-6.77296	-1.84611e-12	-1.84611				6.77368	2.54556e-12	2.54556
				3.22712	2.45258e-12								-6.77064	7.67398e-14	0.0767398				6.77136	2.3441e-12	2.3441
				3.22944	2.81975e-12								-6.76832	-3.38109e-13	-0.338109				6.76904	5.82187e-13	0.582187
				3.23176	3.70189e-12								-6.766	1.90899e-12	1.90899				6.76672	1.9972e-12	1.9972
				3.23408	3.17022e-12								-6.76368	-1.49325e-12	-1.49325				6.7644	3.07605e-12	3.07605
				3.2364	2.21297e-12								-6.76136	-6.17058e-13	-0.617058				6.76208	1.36182e-12	1.36182
				3.23872	3.96415e-12								-6.75904	3.38245e-14	0.0338245				6.75976	1.27241e-12	1.27241
				3.24104	3.99992e-12								-6.75672	8.65905e-13	0.865905				6.75744	2.18674e-12	2.18674
				3.24336	2.13429e-12								-6.7544	-1.12608e-12	-1.12608				6.75512	1.45718e-12	1.45718
				3.24568	3.49447e-12								-6.75208	-1.30013e-12	-1.30013				6.7528	1.88753e-12	1.88753
				3.248	2.85312e-12								-6.74976	8.93323e-13	0.893323				6.75048	1.72898e-12	1.72898
				3.25032	1.86249e-12								-6.74744	4.05757e-13	0.405757				6.74816	-2.09362e-13	-0.209362
				3.25264	1.49056e-12								-6.74512	-7.27923e-13	-0.727923				6.74584	2.38106e-12	2.38106
				3.25496	1.88753e-12								-6.7428	4.40328e-13	0.440328				6.74352	1.71352e-14	0.0171352
				3.25728	1.39639e-12								-6.74048	4.29599e-13	0.429599				6.7412	3.49328e-12	3.49328
				3.2596	1.86369e-12								-6.73816	3.15234e-12	3.15234				6.73888	2.64212e-12	2.64212
				3.26192	2.59802e-12								-6.73584	-1.54526e-13	-0.154526				6.73656	-2.91617e-13	-0.291617
				3.26424	2.33456e-12								-6.73352	-1.41099e-12	-1.41099				6.73424	-2.8208e-13	-0.28208
				3.26656	8.09877e-13								-6.7312	-1.59338e-12	-1.59338				6.73192	-3.17406e-14	-0.0317406
				3.26888	2.08184e-12								-6.72888	-1.70663e-12	-1.70663				6.7296	9.97035e-13	0.997035
				3.2712	3.34665e-12								-6.72656	-4.36616e-14	-0.0436616				6.72728	3.00853e-13	0.300853
				3.27352	1.91733e-12								-6.72424	-3.89368e-13	-0.389368				6.72496	1.23668e-14	0.0123668
				3.27584	1.9066e-12								-6.72192	1.29387e-12	1.29387				6.72264	1.31532e-12	1.31532
				3.27816	1.99959e-12								-6.7196	-1.70425e-12	-1.70425				6.72032	1.38327e-12	1.38327
				3.28048	2.90081e-12								-6.71728	3.58074e-13	0.358074				6.718	2.42993e-12	2.42993
				3.2828	1.87918e-12								-6.71496	-8.14946e-13	-0.814946				6.71568	1.27241e-12	1.27241
				3.28512	3.51354e-12								-6.71264	3.53305e-13	0.353305				6.71336	1.0328e-12	1.0328
				3.28744	2.058e-12								-6.71032	1.96144e-12	1.96144				6.71104	6.28679e-13	0.628679
				3.28976	5.18486e-12								-6.708	-5.52685e-13	-0.552685				6.70872	2.60322e-13	0.260322
				3.29208	2.72676e-12								-6.70568	-1.39669e-12	-1.39669				6.7064	4.48673e-13	0.448673
				3.2944	1.92329e-12								-6.70336	1.01015e-12	1.01015				6.70408	3.77147e-13	0.377147
				3.29672	3.1738e-12								-6.70104	1.00538e-12	1.00538				6.70176	7.43556e-14	0.0743556
				3.29904	3.00094e-12								-6.69872	-1.68041e-12	-1.68041				6.69944	5.98876e-13	0.598876
				3.30136	2.99498e-12								-6.6964	-1.83657e-12	-1.83657				6.69712	9.23126e-13	0.923126
				3.30368	1.99839e-12								-6.69408	-8.3998e-13	-0.83998				6.6948	2.24635e-12	2.24635
				3.306	2.11164e-12								-6.69176	-7.22718e-14	-0.0722718				6.69248	6.02453e-13	0.602453
				3.30832	2.99379e-12								-6.68944	-1.36212e-12	-1.36212				6.69016	3.54497e-13	0.354497
				3.31064	1.54659e-12								-6.68712	-1.05813e-12	-1.05813				6.68784	5.65498e-13	0.565498
				3.31296	1.22473e-12								-6.6848	-1.27986e-12	-1.27986				6.68552	-6.63113e-14	-0.0663113
				3.31528	2.68623e-12								-6.68248	1.44288e-12	1.44288				6.6832	-7.29115e-13	-0.729115
				3.3176	3.41818e-12								-6.68016	1.89349e-12	1.89349				6.68088	1.12221e-12	1.12221
				3.31992	3.4444e-12								-6.67784	1.24738e-12	1.24738				6.67856	2.09615e-12	2.09615
				3.32224	2.08184e-12								-6.67552	3.36616e-13	0.336616				6.67624	4.1291e-13	0.41291
				3.32456	1.70991e-12								-6.6732	2.29046e-12	2.29046				6.67392	8.82595e-13	0.882595
				3.32688	2.89604e-12								-6.67088	5.22583e-13	0.522583				6.6716	6.20334e-13	0.620334
				3.3292	1.34036e-12								-6.66856	-9.96144e-13	-0.996144				6.66928	1.84461e-12	1.84461
				3.33152	2.50623e-12								-6.66624	2.14979e-12	2.14979				6.66696	1.50248e-12	1.50248
				3.33384	2.4502e-12								-6.66392	1.22234e-12	1.22234				6.66464	9.15973e-13	0.915973
				3.33616	3.25963e-12								-6.6616	2.01031e-12	2.01031				6.66232	2.47642e-12	2.47642
				3.33848	3.29062e-12								-6.65928	-3.83408e-13	-0.383408				6.66	2.16171e-12	2.16171
				3.3408	1.90422e-12								-6.65696	1.17108e-12	1.17108				6.65768	1.99959e-12	1.99959
				3.34312	2.23324e-12								-6.65464	1.66461e-12	1.66461				6.65536	7.39543e-13	0.739543
				3.34544	4.16323e-12								-6.65232	-2.47509e-13	-0.247509				6.65304	-1.20834e-12	-1.20834
				3.34776	1.1985e-12								-6.65	-3.05485e-14	-0.0305485				6.65072	1.30221e-12	1.30221
				3.35008	2.30715e-12								-6.64768	-1.76504e-12	-1.76504				6.6484	1.16631e-12	1.16631
				3.3524	7.02589e-13								-6.64536	-1.2596e-12	-1.2596				6.64608	2.93419e-12	2.93419
				3.35472	-2.69723e-14								-6.64304	1.03757e-12	1.03757				6.64376	2.73511e-12	2.73511
				3.35704	4.42712e-13								-6.64072	-3.92945e-13	-0.392945				6.64144	2.33456e-12	2.33456
				3.35936	1.82836e-13								-6.6384	4.05757e-13	0.405757				6.63912	3.74123e-12	3.74123
				3.36168	1.82792e-12								-6.63608	5.20198e-13	0.520198				6.6368	3.60891e-12	3.60891
				3.364	3.3991e-12								-6.63376	4.15294e-13	0.415294				6.63448	2.48715e-12	2.48715
				3.36632	3.5958e-12								-6.63144	1.605e-12	1.605				6.63216	8.86171e-13	0.886171
				3.36864	2.63259e-12								-6.62912	-2.36781e-13	-0.236781				6.62984	1.32009e-12	1.32009
				3.37096	1.96978e-12								-6.6268	-1.23218e-12	-1.23218				6.62752	1.01492e-12	1.01492
				3.37328	3.14996e-12								-6.62448	-2.13936e-12	-2.13936				6.6252	5.53577e-13	0.553577
				3.3756	1.40473e-12								-6.62216	-6.23019e-13	-0.623019				6.62288	7.19278e-13	0.719278
				3.37792	1.90064e-12								-6.61984	-1.43364e-12	-1.43364				6.62056	3.72335e-12	3.72335
				3.38024	1.99482e-12								-6.61752	1.86412e-13	0.186412				6.61824	4.92975e-12	4.92975
				3.38256	1.62527e-12								-6.6152	-6.03509e-14	-0.0603509				6.61592	2.80425e-12	2.80425
				3.38488	2.8412e-12								-6.61288	9.52928e-13	0.952928				6.6136	8.86171e-13	0.886171
				3.3872	2.9771e-12								-6.61056	1.45599e-12	1.45599				6.61128	2.72438e-12	2.72438
				3.38952	1.72421e-12								-6.60824	1.5752e-12	1.5752				6.60896	2.34052e-12	2.34052
				3.39184	6.29871e-13								-6.60592	1.40354e-12	1.40354				6.60664	3.20002e-12	3.20002
				3.39416	1.24499e-12								-6.6036	-8.89611e-14	-0.0889611				6.60432	1.11148e-12	1.11148
				3.39648	1.96144e-12								-6.60128	-1.10939e-12	-1.10939				6.602	1.69083e-12	1.69083
				3.3988	2.74464e-12								-6.59896	3.66418e-13	0.366418				6.59968	3.01406e-12	3.01406
				3.40112	3.71024e-12								-6.59664	-4.21555e-13	-0.421555				6.59736	1.9364e-12	1.9364
				3.40344	3.04028e-12								-6.59432	-2.06978e-13	-0.206978				6.59504	2.51219e-12	2.51219
				3.40576	1.71587e-12								-6.592	6.27487e-13	0.627487				6.59272	3.39791e-12	3.39791
				3.40808	8.63521e-13								-6.58968	3.05622e-13	0.305622				6.5904	2.89366e-12	2.89366
				3.4104	-9.84978e-14								-6.58736	8.21798e-13	0.821798				6.58808	2.16171e-12	2.16171
				3.41272	4.56139e-12								-6.58504	-1.62434e-14	-0.0162434				6.58576	4.51848e-12	4.51848
				3.41504	3.27036e-12								-6.58272	-1.50755e-12	-1.50755				6.58344	1.63481e-12	1.63481
				3.41736	1.89945e-12								-6.5804	1.06022e-12	1.06022				6.58112	2.5098e-12	2.5098
				3.41968	1.76713e-12								-6.57808	2.35288e-13	0.235288				6.5788	2.98187e-12	2.98187
				3.422	1.32963e-12								-6.57576	5.35696e-13	0.535696				6.57648	3.58268e-12	3.58268
				3.42432	8.83787e-13								-6.57344	2.02224e-12	2.02224				6.57416	4.19065e-12	4.19065
				3.42664	1.08883e-12								-6.57112	2.01866e-12	2.01866				6.57184	2.60278e-12	2.60278
				3.42896	2.30238e-12								-6.5688	1.18896e-12	1.18896				6.56952	1.51202e-12	1.51202
				3.43128	2.43947e-12								-6.56648	-8.29251e-13	-0.829251				6.5672	2.12714e-12	2.12714
				3.4336	2.87339e-12								-6.56416	-4.48537e-14	-0.0448537				6.56488	1.81123e-12	1.81123
				3.43592	1.49652e-12								-6.56184	-3.22611e-13	-0.322611				6.56256	6.25103e-13	0.625103
				3.43824	2.59444e-12								-6.55952	7.55041e-13	0.755041				6.56024	1.06856e-12	1.06856
				3.44056	3.22863e-12								-6.5572	4.73707e-13	0.473707				6.55792	9.15973e-13	0.915973
				3.44288	2.03892e-12								-6.55488	1.11863e-12	1.11863				6.5556	2.53841e-12	2.53841
				3.4452	2.29165e-12								-6.55256	1.44884e-12	1.44884				6.55328	2.73988e-12	2.73988
				3.44752	1.64673e-12								-6.55024	-1.87948e-12	-1.87948				6.55096	2.81259e-12	2.81259
				3.44984	3.54811e-12								-6.54792	-4.34668e-13	-0.434668				6.54864	4.28407e-13	0.428407
				3.45216	4.21092e-12								-6.5456	-1.47298e-12	-1.47298				6.54632	3.1635e-13	0.31635
				3.45448	2.39894e-12								-6.54328	9.29086e-13	0.929086				6.544	1.29029e-12	1.29029
				3.4568	1.30817e-12								-6.54096	1.14009e-12	1.14009				6.54168	2.5706e-12	2.5706
				3.45912	2.48596e-12								-6.53864	7.19714e-14	0.0719714				6.53936	2.31191e-12	2.31191
				3.46144	2.17721e-12								-6.53632	1.43215e-12	1.43215				6.53704	3.44961e-13	0.344961
				3.46376	3.65063e-12								-6.534	2.33337e-12	2.33337				6.53472	3.52113e-13	0.352113
				3.46608	2.78398e-12								-6.53168	8.98092e-13	0.898092				6.5324	1.04353e-12	1.04353
				3.4684	1.09956e-12								-6.52936	-5.07386e-13	-0.507386				6.53008	5.39272e-13	0.539272
				3.47072	1.17466e-12								-6.52704	2.11446e-13	0.211446				6.52776	7.89611e-13	0.789611
				3.47304	-8.78127e-13								-6.52472	5.92916e-13	0.592916				6.52544	1.18181e-12	1.18181
				3.47536	-3.95329e-13								-6.5224	7.70538e-13	0.770538				6.52312	2.67193e-12	2.67193
				3.47768	2.44424e-12								-6.52008	2.5913e-13	0.25913				6.5208	9.75578e-13	0.975578
				3.48	2.91988e-12								-6.51776	1.62288e-12	1.62288				6.51848	2.04294e-13	0.204294
				3.48232	1.70871e-12								-6.51544	2.57938e-13	0.257938				6.51616	2.48477e-12	2.48477
				3.48464	2.0425e-12								-6.51312	-7.18386e-13	-0.718386				6.51384	2.80782e-12	2.80782
				3.48696	2.43112e-12								-6.5108	5.41656e-13	0.541656				6.51152	2.59206e-12	2.59206
				3.48928	5.54368e-12								-6.50848	1.425e-12	1.425				6.5092	3.01167e-12	3.01167
				3.4916	3.32042e-12								-6.50616	7.34775e-13	0.734775				6.50688	2.7065e-12	2.7065
				3.49392	1.41188e-12								-6.50384	8.52792e-13	0.852792				6.50456	2.10687e-12	2.10687
				3.49624	1.9972e-12								-6.50152	-6.73087e-13	-0.673087				6.50224	2.27734e-12	2.27734
				3.49856	2.93776e-12								-6.4992	2.54798e-14	0.0254798				6.49992	2.93701e-13	0.293701
				3.50088	2.01151e-12								-6.49688	-2.20091e-13	-0.220091				6.4976	1.75282e-12	1.75282
				3.5032	1.38089e-12								-6.49456	5.10662e-13	0.510662				6.49528	1.43811e-12	1.43811
				3.50552	2.64808e-12								-6.49224	5.30927e-13	0.530927				6.49296	1.79097e-12	1.79097
				3.50784	3.3991e-12								-6.48992	-6.44476e-13	-0.644476				6.49064	6.95436e-13	0.695436
				3.51016	2.8269e-12								-6.4876	-7.4342e-13	-0.74342				6.48832	2.1383e-13	0.21383
				3.51248	1.82792e-12								-6.48528	-3.75063e-13	-0.375063				6.486	1.45718e-12	1.45718
				3.5148	1.66461e-12								-6.48296	-5.95601e-13	-0.595601				6.48368	-6.76663e-13	-0.676663
				3.51712	2.95684e-12								-6.48064	2.68667e-13	0.268667				6.48136	2.67908e-12	2.67908
				3.51944	1.71706e-12								-6.47832	1.98409e-12	1.98409				6.47904	2.66716e-12	2.66716
				3.52176	2.2845e-12								-6.476	1.41665e-12	1.41665				6.47672	2.73153e-12	2.73153
				3.52408	3.49566e-12								-6.47368	1.6956e-12	1.6956				6.4744	2.75656e-12	2.75656
				3.5264	4.30867e-12								-6.47136	8.37295e-13	0.837295				6.47208	3.45632e-12	3.45632
				3.52872	4.29198e-12								-6.46904	-1.23218e-12	-1.23218				6.46976	2.238e-12	2.238
				3.53104	2.64332e-12								-6.46672	3.62087e-14	0.0362087				6.46744	5.51193e-13	0.551193
				3.53336	1.87322e-12								-6.4644	1.35152e-13	0.135152				6.46512	2.26781e-12	2.26781
				3.53568	1.13174e-12								-6.46208	-2.62573e-12	-2.62573				6.4628	3.12254e-12	3.12254
				3.538	2.29165e-12								-6.45976	-1.98439e-12	-1.98439				6.46048	1.47268e-12	1.47268
				3.54032	1.09717e-12								-6.45744	1.38327e-12	1.38327				6.45816	9.37431e-13	0.937431
				3.54264	2.27496e-12								-6.45512	-9.40115e-13	-0.940115				6.45584	-1.59295e-13	-0.159295
				3.54496	3.58745e-12								-6.4528	-5.59838e-13	-0.559838				6.45352	2.31072e-12	2.31072
				3.54728	8.30142e-13								-6.45048	5.23775e-13	0.523775				6.4512	2.72676e-12	2.72676
				3.5496	1.20684e-12								-6.44816	-8.12561e-13	-0.812561				6.44888	2.54437e-12	2.54437
				3.55192	5.52385e-13								-6.44584	-9.12697e-13	-0.912697				6.44656	1.57758e-12	1.57758
				3.55424	2.3441e-12								-6.44352	6.72031e-14	0.0672031				6.44424	9.74386e-13	0.974386
				3.55656	1.82912e-12								-6.4412	-6.1229e-13	-0.61229				6.44192	1.69322e-12	1.69322
				3.55888	8.49216e-13								-6.43888	-3.34532e-13	-0.334532				6.4396	2.42755e-12	2.42755
				3.5612	2.21535e-12								-6.43656	2.34096e-13	0.234096				6.43728	2.15933e-12	2.15933
				3.56352	3.22983e-12								-6.43424	5.45232e-13	0.545232				6.43496	1.03995e-12	1.03995
				3.56584	2.5849e-12								-6.43192	8.07493e-13	0.807493				6.43264	1.46672e-12	1.46672
				3.56816	3.48374e-12								-6.4296	-6.87392e-13	-0.687392				6.43032	3.56882e-13	0.356882
				3.57048	3.38837e-12								-6.42728	6.32255e-13	0.632255				6.428	3.15158e-13	0.315158
				3.5728	2.40609e-12								-6.42496	9.58889e-13	0.958889				6.42568	2.14383e-12	2.14383
				3.57512	2.29284e-12								-6.42264	5.82187e-13	0.582187				6.42336	1.88514e-12	1.88514
				3.57744	2.43589e-12								-6.42032	4.00989e-13	0.400989				6.42104	1.0018e-12	1.0018
				3.57976	2.25469e-12								-6.418	1.63361e-12	1.63361				6.41872	2.17125e-12	2.17125
				3.58208	3.13327e-12								-6.41568	3.04744e-12	3.04744				6.4164	6.00505e-14	0.0600505
				3.5844	1.97932e-12								-6.41336	9.97035e-13	0.997035				6.41408	1.37612e-12	1.37612
				3.58672	2.14741e-12								-6.41104	-2.10121e-12	-2.10121				6.41176	1.5597e-12	1.5597
				3.58904	2.51338e-12								-6.40872	-1.28225e-12	-1.28225				6.40944	1.53467e-12	1.53467
				3.59136	3.38361e-12								-6.4064	1.04234e-12	1.04234				6.40712	1.91181e-13	0.191181
				3.59368	3.46228e-12								-6.40408	-6.37324e-13	-0.637324				6.4048	8.61137e-13	0.861137
				3.596	3.90217e-12								-6.40176	1.10118e-13	0.110118				6.40248	4.71323e-13	0.471323
				3.59832	2.52172e-12								-6.39944	-1.20238e-12	-1.20238				6.40016	2.54362e-13	0.254362
				3.60064	1.42619e-12								-6.39712	-1.35496e-12	-1.35496				6.39784	7.00204e-13	0.700204
				3.60296	2.39774e-12								-6.3948	1.67339e-13	0.167339				6.39552	1.39639e-12	1.39639
				3.60528	2.79114e-12								-6.39248	8.01532e-13	0.801532				6.3932	1.63957e-12	1.63957
				3.6076	3.13803e-12								-6.39016	5.85763e-13	0.585763				6.39088	-5.78911e-13	-0.578911
				3.60992	3.33235e-12								-6.38784	4.05757e-13	0.405757				6.38856	5.48809e-13	0.548809
				3.61224	4.31463e-12								-6.38552	-9.01968e-13	-0.901968				6.38624	4.64961e-12	4.64961
				3.61456	3.0069e-12								-6.3832	7.97956e-13	0.797956				6.38392	2.75895e-12	2.75895
				3.61688	1.78382e-12								-6.38088	1.51679e-12	1.51679				6.3816	-5.45533e-13	-0.545533
				3.6192	2.18198e-12								-6.37856	-1.14516e-12	-1.14516				6.37928	1.36658e-12	1.36658
				3.62152	5.20198e-13								-6.37624	-2.16916e-12	-2.16916				6.37696	2.22251e-12	2.22251
				3.62384	1.69441e-12								-6.37392	-1.40146e-12	-1.40146				6.37464	2.86266e-12	2.86266
				3.62616	2.64808e-12								-6.3716	-1.18211e-12	-1.18211				6.37232	6.66826e-13	0.666826
				3.62848	2.48834e-12								-6.36928	8.50845e-14	0.0850845				6.37	3.2334e-12	3.2334
				3.6308	4.27648e-12								-6.36696	9.58889e-13	0.958889				6.36768	1.23545e-12	1.23545
				3.63312	3.76508e-12								-6.36464	1.01015e-12	1.01015				6.36536	1.50725e-12	1.50725
				3.63544	2.91154e-12								-6.36232	-6.50437e-13	-0.650437				6.36304	6.2391e-13	0.62391
				3.63776	3.25963e-12								-6.36	-1.27629e-12	-1.27629				6.36072	4.14102e-13	0.414102
				3.64008	3.57672e-12								-6.35768	-8.88855e-13	-0.888855				6.3584	6.42984e-13	0.642984
				3.6424	1.62169e-12								-6.35536	-9.21042e-13	-0.921042				6.35608	2.1033e-12	2.1033
				3.64472	3.27036e-12								-6.35304	-4.78775e-13	-0.478775				6.35376	2.48596e-12	2.48596
				3.64704	2.902e-12								-6.35072	-2.88041e-13	-0.288041				6.35144	2.60517e-12	2.60517
				3.64936	2.69934e-12								-6.3484	-1.29297e-12	-1.29297				6.34912	4.42192e-12	4.42192
				3.65168	4.38377e-12								-6.34608	6.4656e-13	0.64656				6.3468	1.41427e-12	1.41427
				3.654	2.02343e-12								-6.34376	-3.41248e-14	-0.0341248				6.34448	7.06165e-13	0.706165
				3.65632	4.67583e-12								-6.34144	8.31335e-13	0.831335				6.34216	2.64093e-12	2.64093
				3.65864	2.79114e-12								-6.33912	7.72922e-13	0.772922				6.33984	2.88054e-12	2.88054
				3.66096	3.54811e-12								-6.3368	2.0787e-13	0.20787				6.33752	2.43828e-12	2.43828
				3.66328	2.82451e-12								-6.33448	-3.34532e-13	-0.334532				6.3352	1.62527e-12	1.62527
				3.6656	5.21943e-12								-6.33216	3.09198e-13	0.309198				6.33288	3.57076e-12	3.57076
				3.66792	3.72216e-12								-6.32984	-3.77011e-14	-0.0377011				6.33056	1.97098e-12	1.97098
				3.67024	4.32178e-12								-6.32752	9.21934e-13	0.921934				6.32824	3.22863e-12	3.22863
				3.67256	1.64673e-12								-6.3252	1.50964e-12	1.50964				6.32592	4.8682e-13	0.48682
				3.67488	2.11999e-12								-6.32288	-5.90832e-13	-0.590832				6.3236	1.32248e-12	1.32248
				3.6772	1.23903e-12								-6.32056	-1.88664e-12	-1.88664				6.32128	1.63481e-12	1.63481
				3.67952	3.91409e-12								-6.31824	-1.2584e-12	-1.2584				6.31896	1.03637e-12	1.03637
				3.68184	1.92806e-12								-6.31592	6.15566e-13	0.615566				6.31664	3.95029e-13	0.395029
				3.68416	2.93419e-12								-6.3136	6.25103e-13	0.625103				6.31432	-1.48566e-13	-0.148566
				3.68648	2.98902e-12								-6.31128	1.61216e-12	1.61216				6.312	-1.86713e-13	-0.186713
				3.6888	3.03909e-12								-6.30896	-2.08929e-12	-2.08929				6.30968	6.72031e-14	0.0672031
				3.69112	2.18198e-12								-6.30664	-2.12744e-12	-2.12744				6.30736	1.23784e-12	1.23784
				3.69344	3.4754e-12								-6.30432	5.30927e-13	0.530927				6.30504	2.54318e-12	2.54318
				3.69576	2.2237e-12								-6.302	5.51193e-13	0.551193				6.30272	2.28688e-12	2.28688
				3.69808	3.21552e-12								-6.29968	-2.12744e-12	-2.12744				6.3004	6.03645e-13	0.603645
				3.7004	2.93538e-12								-6.29736	-1.95459e-12	-1.95459				6.29808	1.02088e-12	1.02088
				3.70272	3.60295e-12								-6.29504	-9.41307e-13	-0.941307				6.29576	3.13966e-13	0.313966
				3.70504	1.03637e-12								-6.29272	9.98228e-13	0.998228				6.29344	3.31848e-13	0.331848
				3.70736	2.87101e-12								-6.2904	5.34503e-13	0.534503				6.29112	1.11982e-12	1.11982
				3.70968	4.71756e-12								-6.28808	-4.10826e-13	-0.410826				6.2888	1.50964e-12	1.50964
				3.712	2.48238e-12								-6.28576	1.50368e-12	1.50368				6.28648	2.38582e-12	2.38582
				3.71432	1.49056e-12								-6.28344	-2.84464e-13	-0.284464				6.28416	1.5299e-12	1.5299
				3.71664	2.11879e-12								-6.28112	-1.04458e-13	-0.104458				6.28184	4.6417e-13	0.46417
				3.71896	1.56447e-12								-6.2788	-3.35724e-13	-0.335724				6.27952	1.46553e-12	1.46553
				3.72128	4.04999e-12								-6.27648	-6.862e-13	-0.6862				6.2772	-8.48324e-13	-0.848324
				3.7236	2.27854e-12								-6.27416	1.53034e-13	0.153034				6.27488	2.35006e-12	2.35006
				3.72592	1.37135e-12								-6.27184	5.75035e-13	0.575035				6.27256	1.26526e-12	1.26526
				3.72824	2.94134e-12								-6.26952	2.06678e-13	0.206678				6.27024	1.08525e-12	1.08525
				3.73056	3.50162e-12								-6.2672	-1.84329e-13	-0.184329				6.26792	9.41007e-13	0.941007
				3.73288	2.74226e-12								-6.26488	-7.60109e-13	-0.760109				6.2656	-2.32012e-13	-0.232012
				3.7352	1.10909e-12								-6.26256	-1.3502e-12	-1.3502				6.26328	3.92644e-13	0.392644
				3.73752	4.01422e-12								-6.26024	1.16079e-13	0.116079				6.26096	1.26526e-12	1.26526
				3.73984	3.98084e-12								-6.25792	9.66041e-13	0.966041				6.25864	4.28407e-13	0.428407
				3.74216	4.26099e-12								-6.2556	2.09615e-12	2.09615				6.25632	9.38623e-13	0.938623
				3.74448	2.98664e-12								-6.25328	1.94356e-12	1.94356				6.254	2.66954e-12	2.66954
				3.7468	3.88905e-12								-6.25096	8.83787e-13	0.883787				6.25168	9.66041e-13	0.966041
				3.74912	5.20393e-12								-6.24864	8.74687e-14	0.0874687				6.24936	2.58729e-12	2.58729
				3.75144	4.56139e-12								-6.24632	4.8682e-13	0.48682				6.24704	1.49295e-12	1.49295
				3.75376	3.89859e-12								-6.244	-2.06978e-13	-0.206978				6.24472	2.59444e-12	2.59444
				3.75608	3.25605e-12								-6.24168	-1.14751e-14	-0.0114751				6.2424	2.57656e-12	2.57656
				3.7584	2.2392e-12								-6.23936	-4.56126e-13	-0.456126				6.24008	2.4049e-12	2.4049
				3.76072	1.57401e-12								-6.23704	1.57043e-12	1.57043				6.23776	-1.11774e-12	-1.11774
				3.76304	1.87799e-12								-6.23472	1.41784e-12	1.41784				6.23544	1.74491e-13	0.174491
				3.76536	3.14399e-12								-6.2324	1.73299e-13	0.173299				6.23312	-5.02617e-13	-0.502617
				3.76768	3.88071e-12								-6.23008	6.22718e-13	0.622718				6.2308	1.48222e-12	1.48222
				3.77	5.02393e-12								-6.22776	-1.04621e-12	-1.04621				6.22848	1.74686e-12	1.74686
				3.77232	4.29317e-12								-6.22544	1.31576e-13	0.131576				6.22616	2.28569e-12	2.28569
				3.77464	2.41086e-12								-6.22312	9.83922e-13	0.983922				6.22384	2.53364e-12	2.53364
				3.77696	2.60159e-12								-6.2208	-1.32635e-12	-1.32635				6.22152	3.11062e-12	3.11062
				3.77928	9.18357e-13								-6.21848	-8.69782e-13	-0.869782				6.2192	1.14009e-12	1.14009
				3.7816	2.77206e-12								-6.21616	1.71468e-12	1.71468				6.21688	2.89842e-12	2.89842
				3.78392	3.12134e-12								-6.21384	2.55554e-13	0.255554				6.21456	4.32536e-12	4.32536
				3.78624	2.03058e-12								-6.21152	-5.91588e-14	-0.0591588				6.21224	1.20446e-12	1.20446
				3.78856	8.82595e-13								-6.2092	-5.24075e-13	-0.524075				6.20992	8.59945e-13	0.859945
				3.79088	3.43769e-13								-6.20688	-1.16781e-12	-1.16781				6.2076	1.50248e-12	1.50248
				3.7932	2.06873e-12								-6.20456	-1.04264e-12	-1.04264				6.20528	1.55494e-12	1.55494
				3.79552	2.86028e-12								-6.20224	-5.59838e-13	-0.559838				6.20296	3.5648e-12	3.5648
				3.79784	3.29777e-12								-6.19992	1.57043e-12	1.57043				6.20064	8.40871e-13	0.840871
				3.80016	2.78994e-12								-6.1976	8.0034e-13	0.80034				6.19832	8.59945e-13	0.859945
				3.80248	3.13327e-12								-6.19528	-7.33883e-13	-0.733883				6.196	3.38245e-14	0.0338245
				3.8048	2.91869e-12								-6.19296	-1.11297e-12	-1.11297				6.19368	-2.86849e-13	-0.286849
				3.80712	2.78756e-12								-6.19064	-7.46996e-13	-0.746996				6.19136	-7.06465e-13	-0.706465
				3.80944	2.67193e-12								-6.18832	-1.40384e-12	-1.40384				6.18904	8.69482e-13	0.869482
				3.81176	1.42977e-12								-6.186	-1.25125e-12	-1.25125				6.18672	3.24055e-12	3.24055
				3.81408	2.30595e-12								-6.18368	-3.01154e-13	-0.301154				6.1844	3.16664e-12	3.16664
				3.8164	9.13589e-13								-6.18136	-1.95057e-13	-0.195057				6.18208	2.14502e-12	2.14502
				3.81872	2.54318e-12								-6.17904	4.82051e-13	0.482051				6.17976	2.46093e-12	2.46093
				3.82104	4.0333e-12								-6.17672	-1.29774e-12	-1.29774				6.17744	9.46212e-14	0.0946212
				3.82336	7.7769e-13								-6.1744	1.74209e-12	1.74209				6.17512	1.19612e-12	1.19612
				3.82568	3.1285e-12								-6.17208	1.64077e-12	1.64077				6.1728	2.13072e-12	2.13072
				3.828	3.81157e-12								-6.16976	5.84571e-13	0.584571				6.17048	9.3147e-13	0.93147
				3.83032	3.13207e-12								-6.16744	5.94108e-13	0.594108				6.16816	2.4192e-12	2.4192
				3.83264	3.56838e-12								-6.16512	-2.47076e-12	-2.47076				6.16584	3.04505e-12	3.04505
				3.83496	1.5907e-12								-6.1628	6.29871e-13	0.629871				6.16352	2.50742e-12	2.50742
				3.83728	4.04402e-12								-6.16048	1.20327e-12	1.20327				6.1612	1.5144e-12	1.5144
				3.8396	1.54778e-12								-6.15816	5.10662e-13	0.510662				6.15888	1.23665e-12	1.23665
				3.84192	2.22131e-12								-6.15584	2.77011e-13	0.277011				6.15656	2.71246e-12	2.71246
				3.84424	1.82554e-12								-6.15352	9.3147e-13	0.93147				6.15424	1.27479e-12	1.27479
				3.84656	1.4691e-12								-6.1512	1.50964e-12	1.50964				6.15192	1.98528e-12	1.98528
				3.84888	2.01389e-12								-6.14888	1.82196e-12	1.82196				6.1496	8.58753e-13	0.858753
				3.8512	2.99021e-12								-6.14656	1.56209e-12	1.56209				6.14728	1.4095e-12	1.4095
				3.85352	5.12764e-12								-6.14424	-6.63113e-14	-0.0663113				6.14496	1.59547e-12	1.59547
				3.85584	5.8262e-12								-6.14192	1.22039e-13	0.122039				6.14264	1.23545e-12	1.23545
				3.85816	1.24738e-12								-6.1396	-1.85207e-12	-1.85207				6.14032	2.94492e-12	2.94492
				3.86048	4.57212e-12								-6.13728	3.65226e-13	0.365226				6.138	3.52189e-12	3.52189
				3.8628	2.07111e-12								-6.13496	9.39815e-13	0.939815				6.13568	3.28585e-12	3.28585
				3.86512	3.48016e-12								-6.13264	1.32486e-12	1.32486				6.13336	4.27648e-12	4.27648
				3.86744	1.77428e-12								-6.13032	1.41784e-12	1.41784				6.13104	2.57417e-12	2.57417
				3.86976	2.94372e-12								-6.128	7.74114e-13	0.774114				6.12872	3.48537e-13	0.348537
				3.87208	2.29642e-12								-6.12568	1.14486e-12	1.14486				6.1264	7.88419e-13	0.788419
				3.8744	3.70666e-12								-6.12336	-7.79183e-13	-0.779183				6.12408	-6.98121e-13	-0.698121
				3.87672	6.27085e-12								-6.12104	1.1532e-12	1.1532				6.12176	-9.63957e-13	-0.963957
				3.87904	4.48987e-12								-6.11872	9.92267e-13	0.992267				6.11944	2.74584e-12	2.74584
				3.88136	4.09052e-12								-6.1164	1.06022e-12	1.06022				6.11712	1.78501e-12	1.78501
				3.88368	4.2884e-12								-6.11408	1.01611e-12	1.01611				6.1148	9.14781e-13	0.914781
				3.886	3.22029e-12								-6.11176	-2.92809e-13	-0.292809				6.11248	1.39996e-12	1.39996
				3.88832	4.43503e-12								-6.10944	2.07115e-14	0.0207115				6.11016	2.47404e-12	2.47404
				3.89064	4.01303e-12								-6.10712	-3.03538e-13	-0.303538				6.10784	4.04565e-13	0.404565
				3.89296	3.76627e-12								-6.1048	-3.18006e-12	-3.18006				6.10552	7.68154e-13	0.768154
				3.89528	1.45838e-12								-6.10248	-7.58917e-13	-0.758917				6.1032	2.17602e-12	2.17602
				3.8976	1.40473e-12								-6.10016	2.56225e-12	2.56225				6.10088	2.83286e-12	2.83286
				3.89992	3.00571e-12								-6.09784	1.72898e-12	1.72898				6.09856	2.09615e-12	2.09615
				3.90224	3.81634e-12								-6.09552	1.34274e-12	1.34274				6.09624	4.82246e-12	4.82246
				3.90456	3.32996e-12								-6.0932	8.65905e-13	0.865905				6.09392	3.25844e-12	3.25844
				3.90688	2.93657e-12								-6.09088	4.49865e-13	0.449865				6.0916	1.42857e-12	1.42857
				3.9092	4.37185e-12								-6.08856	1.88038e-12	1.88038				6.08928	1.62288e-12	1.62288
				3.91152	3.27632e-12								-6.08624	4.83243e-13	0.483243				6.08696	7.6577e-13	0.76577
				3.91384	2.66358e-12								-6.08392	9.50544e-13	0.950544				6.08464	7.19278e-13	0.719278
				3.91616	2.56941e-12								-6.0816	1.36539e-12	1.36539				6.08232	1.22949e-12	1.22949
				3.91848	3.7162e-12								-6.07928	1.28e-13	0.128				6.08	1.32963e-12	1.32963
				3.9208	4.30986e-12								-6.07696	-4.78775e-13	-0.478775				6.07768	1.15797e-12	1.15797
				3.92312	3.35023e-12								-6.07464	9.27894e-13	0.927894				6.07536	-3.6509e-14	-0.036509
				3.92544	3.75911e-12								-6.07232	1.47983e-12	1.47983				6.07304	8.46832e-13	0.846832
				3.92776	3.90097e-12								-6.07	-8.37595e-13	-0.837595				6.07072	2.78041e-12	2.78041
				3.93008	2.92823e-12								-6.06768	1.38566e-12	1.38566				6.0684	1.0471e-12	1.0471
				3.9324	2.22966e-12								-6.06536	6.33447e-13	0.633447				6.06608	-1.70782e-12	-1.70782
				3.93472	3.35142e-12								-6.06304	1.003e-12	1.003				6.06376	1.25214e-12	1.25214
				3.93704	3.98084e-12								-6.06072	5.46424e-13	0.546424				6.06144	1.67534e-12	1.67534
				3.93936	4.30152e-12								-6.0584	8.59945e-13	0.859945				6.05912	8.37295e-13	0.837295
				3.94168	3.99634e-12								-6.05608	2.00197e-12	2.00197				6.0568	2.74627e-13	0.274627
				3.944	1.4691e-12								-6.05376	6.60865e-13	0.660865				6.05448	1.32367e-12	1.32367
				3.94632	9.89883e-13								-6.05144	6.38216e-13	0.638216				6.05216	2.51338e-12	2.51338
				3.94864	2.86266e-12								-6.04912	1.82196e-12	1.82196				6.04984	2.23562e-12	2.23562
				3.95096	1.41308e-12								-6.0468	9.86307e-13	0.986307				6.04752	-8.48324e-13	-0.848324
				3.95328	1.9376e-12								-6.04448	-1.25006e-12	-1.25006				6.0452	2.90081e-12	2.90081
				3.9556	1.95667e-12								-6.04216	-1.23456e-12	-1.23456				6.04288	2.55272e-12	2.55272
				3.95792	1.88634e-12								-6.03984	-1.31324e-12	-1.31324				6.04056	4.54633e-13	0.454633
				3.96024	1.7719e-12								-6.03752	-1.11655e-12	-1.11655				6.03824	1.53586e-12	1.53586
				3.96256	3.05816e-12								-6.0352	8.76634e-13	0.876634				6.03592	3.5803e-12	3.5803
				3.96488	4.26814e-12								-6.03288	1.6503e-12	1.6503				6.0336	1.0471e-12	1.0471
				3.9672	1.60619e-12								-6.03056	-6.86955e-14	-0.0686955				6.03128	1.1532e-12	1.1532
				3.96952	1.28314e-12								-6.02824	1.08644e-12	1.08644				6.02896	-2.77312e-13	-0.277312
				3.97184	3.49328e-12								-6.02592	1.83865e-12	1.83865				6.02664	1.82077e-12	1.82077
				3.97416	3.15115e-12								-6.0236	3.62087e-14	0.0362087				6.02432	1.31294e-12	1.31294
				3.97648	3.566e-12								-6.02128	1.85177e-12	1.85177				6.022	2.30476e-12	2.30476
				3.9788	2.79114e-12								-6.01896	1.0018e-12	1.0018				6.01968	1.92806e-12	1.92806
				3.98112	2.59444e-12								-6.01664	2.09257e-12	2.09257				6.01736	1.62884e-12	1.62884
				3.98344	2.78517e-12								-6.01432	7.97956e-13	0.797956				6.01504	1.09002e-12	1.09002
				3.98576	1.26049e-12								-6.012	1.14247e-12	1.14247				6.01272	2.56583e-12	2.56583
				3.98808	1.74329e-12								-6.00968	-6.51629e-13	-0.651629				6.0104	1.06022e-12	1.06022
				3.9904	1.75401e-12								-6.00736	1.54226e-13	0.154226				6.00808	2.76372e-12	2.76372
				3.99272	5.0947e-13								-6.00504	2.8774e-13	0.28774				6.00576	1.58994e-13	0.158994
				3.99504	1.23784e-12								-6.00272	1.36182e-12	1.36182				6.00344	1.54778e-12	1.54778
				3.99736	4.54633e-13								-6.0004	-2.66984e-12	-2.66984				6.00112	1.75684e-13	0.175684
				3.99968	1.32605e-12								-5.99808	-1.138e-12	-1.138				5.9988	-7.93488e-13	-0.793488
				4.002	3.90932e-12								-5.99576	-1.46583e-12	-1.46583				5.99648	-1.13681e-12	-1.13681
				4.00432	3.83422e-12								-5.99344	1.01849e-12	1.01849				5.99416	3.03237e-13	0.303237
				4.00664	1.17347e-12								-5.99112	-3.73871e-13	-0.373871				5.99184	1.26645e-12	1.26645
				4.00896	1.16154e-12								-5.9888	6.12426e-14	0.0612426				5.98952	9.75578e-13	0.975578
				4.01128	3.56719e-12								-5.98648	-9.18658e-13	-0.918658				5.9872	1.27599e-12	1.27599
				4.0136	2.54914e-12								-5.98416	-2.12939e-13	-0.212939				5.98488	1.53109e-12	1.53109
				4.01592	3.1285e-12								-5.98184	-6.39271e-14	-0.0639271				5.98256	4.99933e-13	0.499933
				4.01824	2.38821e-12								-5.97952	7.09741e-13	0.709741				5.98024	2.6457e-12	2.6457
				4.02056	2.20463e-12								-5.9772	-5.68182e-13	-0.568182				5.97792	1.87322e-12	1.87322
				4.02288	-3.75063e-13								-5.97488	-1.283e-13	-0.1283				5.9756	4.45533e-14	0.0445533
				4.0252	1.27837e-12								-5.97256	7.02589e-13	0.702589				5.97328	1.61378e-13	0.161378
				4.02752	1.89826e-12								-5.97024	1.60739e-12	1.60739				5.97096	1.43453e-12	1.43453
				4.02984	1.59427e-12								-5.96792	1.56328e-12	1.56328				5.96864	2.14264e-12	2.14264
				4.03216	2.65047e-12								-5.9656	-2.23668e-13	-0.223668				5.96632	1.98647e-12	1.98647
				4.03448	1.74925e-12								-5.96328	-2.1489e-12	-2.1489				5.964	1.48579e-12	1.48579
				4.0368	1.003e-12								-5.96096	-1.91763e-12	-1.91763				5.96168	4.33612e-14	0.0433612
				4.03912	1.72421e-12								-5.95864	1.06856e-12	1.06856				5.95936	-1.89097e-13	-0.189097
				4.04144	3.28228e-12								-5.95632	1.64673e-12	1.64673				5.95704	-1.25602e-12	-1.25602
				4.04376	3.74958e-12								-5.954	8.32527e-13	0.832527				5.95472	-1.26671e-14	-0.0126671
				4.04608	3.13923e-12								-5.95168	1.45838e-12	1.45838				5.9524	5.88584e-14	0.0588584
				4.0484	3.30135e-12								-5.94936	1.11863e-12	1.11863				5.95008	-4.72815e-13	-0.472815
				4.05072	2.25827e-12								-5.94704	3.65226e-13	0.365226				5.94776	1.32844e-12	1.32844
				4.05304	3.10108e-12								-5.94472	-1.55047e-12	-1.55047				5.94544	1.03041e-12	1.03041
				4.05536	2.23562e-12								-5.9424	4.3556e-13	0.43556				5.94312	1.50844e-12	1.50844
				4.05768	3.19645e-12								-5.94008	6.35831e-13	0.635831				5.9408	2.21535e-12	2.21535
				4.06	2.93538e-12								-5.93776	-2.90425e-13	-0.290425				5.93848	1.11863e-12	1.11863
				4.06232	2.8412e-12								-5.93544	-1.98197e-14	-0.0198197				5.93616	9.42199e-13	0.942199
				4.06464	4.68775e-12								-5.93312	3.73571e-13	0.373571				5.93384	-7.27923e-13	-0.727923
				4.06696	3.55288e-12								-5.9308	-2.70159e-13	-0.270159				5.93152	-1.33069e-13	-0.133069
				4.06928	7.18086e-13								-5.92848	1.21996e-12	1.21996				5.9292	1.36344e-13	0.136344
				4.0716	3.79726e-12								-5.92616	1.75521e-12	1.75521				5.92688	6.83952e-14	0.0683952
				4.07392	4.25383e-12								-5.92384	1.46791e-12	1.46791				5.92456	-2.14532e-12	-2.14532
				4.07624	4.08456e-12								-5.92152	1.29625e-12	1.29625				5.92224	1.09479e-12	1.09479
				4.07856	3.94866e-12								-5.9192	1.11148e-12	1.11148				5.91992	1.62408e-12	1.62408
				4.08088	2.8722e-12								-5.91688	7.66962e-13	0.766962				5.9176	2.04489e-12	2.04489
				4.0832	9.35047e-13								-5.91456	1.71468e-12	1.71468				5.91528	9.94651e-13	0.994651
				4.08552	1.51679e-12								-5.91224	1.21161e-12	1.21161				5.91296	1.23668e-14	0.0123668
				4.08784	6.27487e-13								-5.90992	-7.68454e-13	-0.768454				5.91064	1.08406e-12	1.08406
				4.09016	2.71842e-12								-5.9076	6.13182e-13	0.613182				5.90832	1.37537e-13	0.137537
				4.09248	1.90541e-12								-5.90528	2.3052e-13	0.23052				5.906	1.31175e-12	1.31175
				4.0948	1.32367e-12								-5.90296	-4.27515e-13	-0.427515				5.90368	1.24738e-12	1.24738
				4.09712	2.48e-12								-5.90064	7.40736e-13	0.740736				5.90136	2.3298e-12	2.3298
				4.09944	2.95326e-12								-5.89832	-1.58102e-13	-0.158102				5.89904	2.93419e-12	2.93419
				4.10176	3.15592e-12								-5.896	-1.34261e-13	-0.134261				5.89672	2.26423e-12	2.26423
				4.10408	1.31294e-12								-5.89368	-5.78911e-13	-0.578911				5.8944	3.12969e-12	3.12969
				4.1064	1.65626e-12								-5.89136	1.47745e-12	1.47745				5.89208	1.70991e-12	1.70991
				4.10872	8.03916e-13								-5.88904	1.01015e-12	1.01015				5.88976	4.47481e-13	0.447481
				4.11104	1.7266e-12								-5.88672	3.46153e-13	0.346153				5.88744	-3.21419e-13	-0.321419
				4.11336	3.1428e-12								-5.8844	2.20983e-13	0.220983				5.88512	1.07452e-12	1.07452
				4.11568	2.18198e-12								-5.88208	1.50606e-12	1.50606				5.8828	9.70809e-13	0.970809
				4.118	3.25486e-12								-5.87976	3.93837e-13	0.393837				5.88048	-4.91888e-13	-0.491888
				4.12032	3.23936e-12								-5.87744	7.74114e-13	0.774114				5.87816	3.69995e-13	0.369995
				4.12264	1.94237e-12								-5.87512	-2.44573e-12	-2.44573				5.87584	-1.36569e-12	-1.36569
				4.12496	3.07843e-12								-5.8728	-6.90968e-13	-0.690968				5.87352	-1.72408e-13	-0.172408
				4.12728	1.18181e-12								-5.87048	1.003e-12	1.003				5.8712	2.31191e-12	2.31191
				4.1296	2.33456e-12								-5.86816	4.45876e-16	0.000445876				5.86888	-1.49758e-13	-0.149758
				4.13192	3.10108e-12								-5.86584	-1.00449e-12	-1.00449				5.86656	1.14843e-12	1.14843
				4.13424	3.75077e-12								-5.86352	-9.36539e-13	-0.936539				5.86424	1.86249e-12	1.86249
				4.13656	2.42516e-12								-5.8612	-2.64199e-13	-0.264199				5.86192	-1.40026e-12	-1.40026
				4.13888	3.40745e-12								-5.85888	1.01611e-12	1.01611				5.8596	5.02317e-13	0.502317
				4.1412	9.17165e-13								-5.85656	-8.65014e-13	-0.865014				5.85728	5.69074e-13	0.569074
				4.14352	1.2581e-12								-5.85424	-1.43364e-12	-1.43364				5.85496	1.34036e-12	1.34036
				4.14584	2.23443e-12								-5.85192	5.69074e-13	0.569074				5.85264	2.44424e-12	2.44424
				4.14816	1.91137e-12								-5.8496	-1.58146e-12	-1.58146				5.85032	9.73194e-13	0.973194
				4.15048	1.03637e-12								-5.84728	-7.51765e-13	-0.751765				5.848	3.11582e-13	0.311582
				4.1528	1.88753e-12								-5.84496	4.36752e-13	0.436752				5.84568	8.13453e-13	0.813453
				4.15512	1.30579e-12								-5.84264	1.92091e-12	1.92091				5.84336	7.89611e-13	0.789611
				4.15744	1.52871e-12								-5.84032	3.27632e-12	3.27632				5.84104	3.71187e-13	0.371187
				4.15976	6.6921e-13								-5.838	7.27622e-13	0.727622				5.83872	2.70292e-12	2.70292
				4.16208	2.79948e-12								-5.83568	-6.6355e-13	-0.66355				5.8364	3.30254e-12	3.30254
				4.1644	3.96773e-12								-5.83336	-1.10419e-13	-0.110419				5.83408	8.969e-13	0.8969
				4.16672	2.65881e-12								-5.83104	-1.44556e-12	-1.44556				5.83176	2.78204e-13	0.278204
				4.16904	2.45377e-12								-5.82872	1.38208e-12	1.38208				5.82944	1.85177e-12	1.85177
				4.17136	2.87339e-12								-5.8264	1.79812e-12	1.79812				5.82712	2.5317e-13	0.25317
				4.17368	2.98068e-12								-5.82408	3.5569e-13	0.35569				5.8248	2.73749e-12	2.73749
				4.176	2.03416e-12								-5.82176	1.36897e-12	1.36897				5.82248	1.78978e-12	1.78978
				4.17832	1.91256e-12								-5.81944	-3.69103e-13	-0.369103				5.82016	1.76474e-12	1.76474
				4.18064	3.09631e-12								-5.81712	3.89068e-13	0.389068				5.81784	1.97336e-12	1.97336
				4.18296	3.34784e-12								-5.8148	4.60594e-13	0.460594				5.81552	2.62706e-13	0.262706
				4.18528	2.5551e-12								-5.81248	1.04591e-12	1.04591				5.8132	3.96221e-13	0.396221
				4.1876	2.18913e-12								-5.81016	1.48222e-12	1.48222				5.81088	-4.299e-13	-0.4299
				4.18992	3.36096e-12								-5.80784	2.05681e-12	2.05681				5.80856	9.49352e-13	0.949352
				4.19224	3.3097e-12								-5.80552	9.83922e-13	0.983922				5.80624	2.44066e-12	2.44066
				4.19456	7.16894e-13								-5.8032	8.26566e-13	0.826566				5.80392	1.58355e-12	1.58355
				4.19688	3.96221e-13								-5.80088	3.87876e-13	0.387876				5.8016	1.20565e-12	1.20565
				4.1992	4.33013e-12								-5.79856	3.6761e-13	0.36761				5.79928	-9.17466e-13	-0.917466
				4.20152	3.80203e-12								-5.79624	9.77962e-13	0.977962				5.79696	-1.56477e-12	-1.56477
				4.20384	2.27138e-12								-5.79392	5.2898e-14	0.052898				5.79464	-7.58917e-13	-0.758917
				4.20616	1.47864e-12								-5.7916	1.53348e-12	1.53348				5.79232	-3.07114e-13	-0.307114
				4.20848	1.76594e-12								-5.78928	-8.11369e-13	-0.811369				5.79	7.00204e-13	0.700204
				4.2108	1.24857e-12								-5.78696	-2.09764e-12	-2.09764				5.78768	7.4312e-13	0.74312
				4.21312	2.61947e-12								-5.78464	-5.51493e-13	-0.551493				5.78536	3.98605e-13	0.398605
				4.21544	3.14519e-12								-5.78232	-8.32827e-13	-0.832827				5.78304	2.04608e-12	2.04608
				4.21776	3.22625e-12								-5.78	-5.57454e-13	-0.557454				5.78072	3.30612e-12	3.30612
				4.22008	2.16171e-12								-5.77768	2.7363e-12	2.7363				5.7784	4.57454e-14	0.0457454
				4.2224	2.34887e-12								-5.77536	1.29148e-12	1.29148				5.77608	4.8682e-13	0.48682
				4.22472	1.9221e-12								-5.77304	6.09605e-13	0.609605				5.77376	-5.08141e-14	-0.0508141
				4.22704	-3.3334e-13								-5.77072	1.4393e-12	1.4393				5.77144	-5.10962e-13	-0.510962
				4.22936	2.78398e-12								-5.7684	1.06975e-12	1.06975				5.76912	2.19151e-12	2.19151
				4.23168	3.37407e-12								-5.76608	7.95572e-13	0.795572				5.7668	-6.28979e-13	-0.628979
				4.234	2.64808e-12								-5.76376	1.87604e-13	0.187604				5.76448	1.24261e-12	1.24261
				4.23632	3.2942e-12								-5.76144	4.11718e-13	0.411718				5.76216	6.01261e-13	0.601261
				4.23864	2.34648e-12								-5.75912	1.1687e-12	1.1687				5.75984	1.08406e-12	1.08406
				4.24096	3.97131e-12								-5.7568	3.11582e-13	0.311582				5.75752	4.04565e-13	0.404565
				4.24328	2.36556e-12								-5.75448	4.08142e-13	0.408142				5.7552	4.1887e-13	0.41887
				4.2456	3.5505e-12								-5.75216	-8.32827e-13	-0.832827				5.75288	2.72243e-13	0.272243
				4.24792	2.87458e-12								-5.74984	2.23367e-13	0.223367				5.75056	-8.34019e-13	-0.834019
				4.25024	2.4192e-12								-5.74752	-4.47781e-13	-0.447781				5.74824	-7.70402e-14	-0.0770402
				4.25256	2.6755e-12								-5.7452	3.98605e-13	0.398605				5.74592	1.19731e-12	1.19731
				4.25488	8.17029e-13								-5.74288	8.70674e-13	0.870674				5.7436	3.30656e-13	0.330656
				4.2572	4.08336e-12								-5.74056	1.01253e-12	1.01253				5.74128	1.72302e-12	1.72302
				4.25952	2.6612e-12								-5.73824	1.09598e-12	1.09598				5.73896	2.34096e-13	0.234096
				4.26184	5.28543e-13								-5.73592	-9.73057e-14	-0.0973057				5.73664	1.18777e-12	1.18777
				4.26416	7.88419e-13								-5.7336	-8.43556e-13	-0.843556				5.73432	2.42993e-12	2.42993
				4.26648	2.53007e-12								-5.73128	-1.76147e-12	-1.76147				5.732	2.23562e-12	2.23562
				4.2688	3.83541e-12								-5.72896	1.24976e-12	1.24976				5.72968	9.67233e-13	0.967233
				4.27112	3.56719e-12								-5.72664	-1.12803e-13	-0.112803				5.72736	6.9782e-13	0.69782
				4.27344	3.62679e-12								-5.72432	1.05783e-12	1.05783				5.72504	2.75819e-13	0.275819
				4.27576	4.00588e-12								-5.722	2.90915e-12	2.90915				5.72272	2.38344e-12	2.38344
				4.27808	4.79385e-12								-5.71968	1.97455e-12	1.97455				5.7204	1.63242e-12	1.63242
				4.2804	1.24022e-12								-5.71736	1.93402e-12	1.93402				5.71808	1.08406e-12	1.08406
				4.28272	3.74719e-12								-5.71504	-1.49205e-12	-1.49205				5.71576	2.97277e-13	0.297277
				4.28504	3.63633e-12								-5.71272	-1.45033e-12	-1.45033				5.71344	2.24873e-12	2.24873
				4.28736	2.86624e-12								-5.7104	-8.63821e-13	-0.863821				5.71112	1.52275e-12	1.52275
				4.28968	4.4994e-12								-5.70808	3.95029e-13	0.395029				5.7088	2.36913e-12	2.36913
				4.292	1.64955e-13								-5.70576	-1.98197e-14	-0.0198197				5.70648	2.35364e-12	2.35364
				4.29432	2.29999e-12								-5.70344	5.88148e-13	0.588148				5.70416	1.76236e-12	1.76236
				4.29664	2.38463e-12								-5.70112	1.42977e-12	1.42977				5.70184	2.56746e-13	0.256746
				4.29896	3.7162e-12								-5.6988	2.55554e-13	0.255554				5.69952	1.35228e-12	1.35228
				4.30128	3.11062e-12								-5.69648	1.03041e-12	1.03041				5.6972	7.50272e-13	0.750272
				4.3036	3.05459e-12								-5.69416	2.6159e-12	2.6159				5.69488	5.39272e-13	0.539272
				4.30592	4.25264e-12								-5.69184	2.52411e-12	2.52411				5.69256	3.03313e-12	3.03313
				4.30824	4.88564e-12								-5.68952	4.13701e-12	4.13701				5.69024	1.5907e-12	1.5907
				4.31056	1.55136e-12								-5.6872	1.94833e-12	1.94833				5.68792	-5.91588e-14	-0.0591588
				4.31288	1.68845e-12								-5.68488	-5.01425e-13	-0.501425				5.6856	1.39043e-12	1.39043
				4.3152	2.19509e-12								-5.68256	5.07085e-13	0.507085				5.68328	1.37731e-12	1.37731
				4.31752	1.87203e-12								-5.68024	7.43556e-14	0.0743556				5.68096	8.67097e-13	0.867097
				4.31984	3.14638e-12								-5.67792	1.96621e-12	1.96621				5.67864	-3.88932e-14	-0.0388932
				4.32216	2.74584e-12								-5.6756	2.19791e-13	0.219791				5.67632	2.0425e-12	2.0425
				4.32448	3.64706e-12								-5.67328	2.27019e-12	2.27019				5.674	3.83108e-13	0.383108
				4.3268	1.39996e-12								-5.67096	3.4289e-12	3.4289				5.67168	-6.54013e-13	-0.654013
				4.32912	3.09154e-12								-5.66864	1.84028e-13	0.184028				5.66936	3.50166e-14	0.0350166
				4.33144	1.96978e-12								-5.66632	4.29599e-13	0.429599				5.66704	2.94893e-13	0.294893
				4.33376	4.17754e-12								-5.664	1.62169e-12	1.62169				5.66472	2.03535e-12	2.03535
				4.33608	2.39894e-12								-5.66168	1.85892e-12	1.85892				5.6624	-3.51222e-13	-0.351222
				4.3384	3.85925e-12								-5.65936	-5.40764e-13	-0.540764				5.66008	1.39877e-12	1.39877
				4.34072	1.85892e-12								-5.65704	2.25751e-13	0.225751				5.65776	-5.69375e-13	-0.569375
				4.34304	1.85057e-12								-5.65472	1.60977e-12	1.60977				5.65544	1.40592e-12	1.40592
				4.34536	2.04489e-12								-5.6524	2.7959e-12	2.7959				5.65312	5.22583e-13	0.522583
				4.34768	2.4955e-12								-5.65008	1.92373e-13	0.192373				5.6508	9.35047e-13	0.935047
				4.35	1.14247e-12								-5.64776	1.39281e-12	1.39281				5.64848	-6.2735e-14	-0.062735
				4.35232	1.86846e-12								-5.64544	-3.28572e-13	-0.328572				5.64616	1.23188e-12	1.23188
				4.35464	3.06532e-12								-5.64312	-7.36267e-13	-0.736267				5.64384	3.15949e-12	3.15949
				4.35696	2.78994e-12								-5.6408	-1.05098e-12	-1.05098				5.64152	9.42199e-13	0.942199
				4.35928	3.61368e-12								-5.63848	1.57282e-12	1.57282				5.6392	1.60858e-12	1.60858
				4.3616	2.99021e-12								-5.63616	1.42977e-12	1.42977				5.63688	7.25238e-13	0.725238
				4.36392	2.7065e-12								-5.63384	2.34887e-12	2.34887				5.63456	4.04565e-13	0.404565
				4.36624	1.45003e-12								-5.63152	2.06634e-12	2.06634				5.63224	1.84028e-13	0.184028
				4.36856	3.19883e-12								-5.6292	7.19714e-14	0.0719714				5.62992	1.37016e-12	1.37016
				4.37088	6.25103e-13								-5.62688	1.40116e-12	1.40116				5.6276	1.25334e-12	1.25334
				4.3732	5.4404e-13								-5.62456	-4.22747e-13	-0.422747				5.62528	-6.75471e-13	-0.675471
				4.37552	-8.19714e-13								-5.62224	-1.5302e-12	-1.5302				5.62296	3.19927e-13	0.319927
				4.37784	2.50742e-12								-5.61992	5.3808e-13	0.53808				5.62064	1.85415e-12	1.85415
				4.38016	4.40761e-12								-5.6176	1.38327e-12	1.38327				5.61832	2.90796e-12	2.90796
				4.38248	4.14058e-12								-5.61528	1.21757e-12	1.21757				5.616	2.85551e-12	2.85551
				4.3848	2.60278e-12								-5.61296	-2.22475e-13	-0.222475				5.61368	1.03876e-12	1.03876
				4.38712	5.8934e-13								-5.61064	1.69918e-12	1.69918				5.61136	1.22949e-12	1.22949
				4.38944	1.25214e-12								-5.60832	-1.93865e-13	-0.193865				5.60904	1.84581e-12	1.84581
				4.39176	1.59666e-12								-5.606	1.40473e-12	1.40473				5.60672	1.14724e-12	1.14724
				4.39408	2.61471e-12								-5.60368	1.60262e-12	1.60262				5.6044	3.63633e-12	3.63633
				4.3964	2.97114e-12								-5.60136	3.98605e-13	0.398605				5.60208	1.50964e-12	1.50964
				4.39872	1.28433e-12								-5.59904	1.17704e-12	1.17704				5.59976	-5.39572e-13	-0.539572
				4.40104	1.46672e-12								-5.59672	-2.0817e-13	-0.20817				5.59744	8.64713e-13	0.864713
				4.40336	2.99141e-12								-5.5944	1.11863e-12	1.11863				5.59512	3.46467e-12	3.46467
				4.40568	3.66971e-12								-5.59208	1.76713e-12	1.76713				5.5928	-6.15866e-13	-0.615866
				4.408	3.39553e-12								-5.58976	1.77786e-12	1.77786				5.59048	-3.82216e-13	-0.382216
				4.41032	4.08575e-12								-5.58744	6.2391e-13	0.62391				5.58816	-5.28843e-13	-0.528843
				4.41264	3.00571e-12								-5.58512	-1.75984e-13	-0.175984				5.58584	1.99525e-13	0.199525
				4.41496	2.0787e-13								-5.5828	-5.51459e-15	-0.00551459				5.58352	5.80995e-13	0.580995
				4.41728	7.62193e-13								-5.58048	-1.38477e-12	-1.38477				5.5812	1.30221e-12	1.30221
				4.4196	1.26406e-12								-5.57816	-3.0473e-13	-0.30473				5.57888	1.39519e-12	1.39519
				4.42192	2.25112e-12								-5.57584	1.13293e-12	1.13293				5.57656	1.91137e-12	1.91137
				4.42424	3.14519e-12								-5.57352	2.67431e-12	2.67431				5.57424	5.01125e-13	0.501125
				4.42656	3.59699e-12								-5.5712	4.05757e-13	0.405757				5.57192	-1.41457e-12	-1.41457
				4.42888	2.08065e-12								-5.56888	-1.13323e-12	-1.13323				5.5696	-1.19045e-12	-1.19045
				4.4312	6.2391e-13								-5.56656	-1.20118e-12	-1.20118				5.56728	1.94117e-12	1.94117
				4.43352	2.20983e-13								-5.56424	-1.34423e-12	-1.34423				5.56496	-2.47509e-13	-0.247509
				4.43584	1.92687e-12								-5.56192	-1.76862e-12	-1.76862				5.56264	-1.41814e-12	-1.41814
				4.43816	1.21161e-12								-5.5596	-1.47298e-12	-1.47298				5.56032	2.98469e-13	0.298469
				4.44048	2.06873e-12								-5.55728	-1.99826e-13	-0.199826				5.558	9.83922e-13	0.983922
				4.4428	4.02972e-12								-5.55496	-1.16423e-12	-1.16423				5.55568	-9.10313e-13	-0.910313
				4.44512	4.81054e-12								-5.55264	-2.1334e-12	-2.1334				5.55336	9.4816e-13	0.94816
				4.44744	5.15148e-12								-5.55032	1.86412e-13	0.186412				5.55104	2.20701e-12	2.20701
				4.44976	2.39536e-12								-5.548	6.34639e-13	0.634639				5.54872	1.47745e-12	1.47745
				4.45208	4.51967e-12								-5.54568	-5.18115e-13	-0.518115				5.5464	3.84495e-12	3.84495
				4.4544	3.25486e-12								-5.54336	-8.55477e-13	-0.855477				5.54408	8.43256e-13	0.843256
				4.45672	3.43129e-12								-5.54104	-1.99035e-12	-1.99035				5.54176	2.70769e-12	2.70769
				4.45904	4.8916e-12								-5.53872	-1.44675e-12	-1.44675				5.53944	-5.46725e-13	-0.546725
				4.46136	2.37748e-12								-5.5364	-1.73405e-12	-1.73405				5.53712	1.21876e-12	1.21876
				4.46368	1.69322e-12								-5.53408	1.49457e-13	0.149457				5.5348	7.45504e-13	0.745504
				4.466	1.19612e-12								-5.53176	-1.5147e-12	-1.5147				5.53248	2.74822e-12	2.74822
				4.46832	3.07485e-12								-5.52944	-1.22145e-12	-1.22145				5.53016	1.80051e-12	1.80051
				4.47064	3.06293e-12								-5.52712	3.29464e-13	0.329464				5.52784	7.53849e-13	0.753849
				4.47296	2.31311e-12								-5.5248	6.00069e-13	0.600069				5.52552	-4.57318e-13	-0.457318
				4.47528	3.64229e-12								-5.52248	1.78501e-12	1.78501				5.5232	3.41384e-13	0.341384
				4.4776	1.7564e-12								-5.52016	-6.81431e-13	-0.681431				5.52088	-4.31092e-13	-0.431092
				4.47992	3.07843e-12								-5.51784	-6.95736e-13	-0.695736				5.51856	5.6073e-13	0.56073
				4.48224	2.83286e-12								-5.51552	1.6503e-12	1.6503				5.51624	1.02966e-13	0.102966
				4.48456	3.87952e-12								-5.5132	-7.08849e-13	-0.708849				5.51392	1.46672e-12	1.46672
				4.48688	2.02462e-12								-5.51088	1.70514e-12	1.70514				5.5116	-5.6103e-13	-0.56103
				4.4892	3.19645e-12								-5.50856	1.49652e-12	1.49652				5.50928	-9.09121e-13	-0.909121
				4.49152	3.88428e-12								-5.50624	1.99959e-12	1.99959				5.50696	1.07333e-12	1.07333
				4.49384	2.96756e-12								-5.50392	-2.03402e-13	-0.203402				5.50464	1.89349e-12	1.89349
				4.49616	2.03177e-12								-5.5016	-1.58385e-12	-1.58385				5.50232	1.15797e-12	1.15797
				4.49848	3.65421e-12								-5.49928	7.27622e-13	0.727622				5.5	-3.51222e-13	-0.351222
				4.5008	3.45752e-12								-5.49696	2.08542e-12	2.08542				5.49768	2.28211e-12	2.28211
				4.50312	2.21655e-12								-5.49464	3.60458e-13	0.360458				5.49536	2.87458e-12	2.87458
				4.50544	1.49891e-12								-5.49232	-5.47917e-13	-0.547917				5.49304	7.82459e-13	0.782459
				4.50776	2.6457e-12								-5.49	3.66418e-13	0.366418				5.49072	6.4656e-13	0.64656
				4.51008	2.91988e-12								-5.48768	-2.06978e-13	-0.206978				5.4884	3.29464e-13	0.329464
				4.5124	3.66375e-12								-5.48536	-1.27509e-12	-1.27509				5.48608	-1.68831e-13	-0.168831
				4.51472	2.64093e-12								-5.48304	2.17407e-13	0.217407				5.48376	-1.29178e-12	-1.29178
				4.51704	2.73153e-12								-5.48072	-6.51629e-13	-0.651629				5.48144	4.62978e-13	0.462978
				4.51936	2.77206e-12								-5.4784	6.60865e-13	0.660865				5.47912	-6.75034e-14	-0.0675034
				4.52168	3.16068e-12								-5.47608	1.26168e-12	1.26168				5.4768	2.19035e-14	0.0219035
				4.524	3.24771e-12								-5.47376	1.51321e-12	1.51321				5.47448	-1.20118e-12	-1.20118
				4.52632	6.59272e-12								-5.47144	2.3298e-12	2.3298				5.47216	-2.99962e-13	-0.299962
				4.52864	4.30748e-12								-5.46912	8.62329e-13	0.862329				5.46984	1.6813e-12	1.6813
				4.53096	2.04846e-12								-5.4668	4.02181e-13	0.402181				5.46752	2.03177e-12	2.03177
				4.53328	2.99141e-12								-5.46448	1.93565e-13	0.193565				5.4652	1.14724e-12	1.14724
				4.5356	2.08184e-12								-5.46216	-6.87392e-13	-0.687392				5.46288	1.53825e-12	1.53825
				4.53792	2.99975e-12								-5.45984	6.08413e-13	0.608413				5.46056	1.2736e-12	1.2736
				4.54024	4.50298e-12								-5.45752	1.48937e-12	1.48937				5.45824	-1.87114e-12	-1.87114
				4.54256	1.48222e-12								-5.4552	1.43334e-12	1.43334				5.45592	-3.30956e-13	-0.330956
				4.54488	2.6612e-12								-5.45288	2.11164e-12	2.11164				5.4536	2.37271e-12	2.37271
				4.5472	3.12492e-12								-5.45056	1.38923e-12	1.38923				5.45128	-1.97442e-13	-0.197442
				4.54952	4.199e-12								-5.44824	1.76713e-12	1.76713				5.44896	1.97141e-13	0.197141
				4.55184	2.30834e-12								-5.44592	1.72183e-12	1.72183				5.44664	-8.3998e-13	-0.83998
				4.55416	1.05068e-12								-5.4436	1.57401e-12	1.57401				5.44432	-2.7612e-13	-0.27612
				4.55648	1.92925e-12								-5.44128	5.83379e-13	0.583379				5.442	1.22234e-12	1.22234
				4.5588	2.08303e-12								-5.43896	1.7926e-13	0.17926				5.43968	-1.77176e-13	-0.177176
				4.56112	3.10466e-12								-5.43664	-8.6859e-13	-0.86859				5.43736	-1.90289e-13	-0.190289
				4.56344	3.86163e-12								-5.43432	-6.48053e-13	-0.648053				5.43504	3.81916e-13	0.381916
				4.56576	3.56838e-12								-5.432	-1.48967e-12	-1.48967				5.43272	2.41682e-12	2.41682
				4.56808	2.18198e-12								-5.42968	3.78339e-13	0.378339				5.4304	3.21194e-12	3.21194
				4.5704	3.01644e-12								-5.42736	-5.02617e-13	-0.502617				5.42808	3.49805e-12	3.49805
				4.57272	4.2431e-12								-5.42504	-1.11178e-12	-1.11178				5.42576	2.36794e-12	2.36794
				4.57504	4.42669e-12								-5.42272	-1.75312e-12	-1.75312				5.42344	4.11718e-13	0.411718
				4.57736	2.74941e-12								-5.4204	1.02088e-12	1.02088				5.42112	1.7254e-12	1.7254
				4.57968	4.43384e-12								-5.41808	2.0191e-13	0.20191				5.4188	6.56097e-13	0.656097
				4.582	4.62457e-12								-5.41576	-1.0565e-13	-0.10565				5.41648	5.03509e-13	0.503509
				4.58432	4.0929e-12								-5.41344	3.37808e-13	0.337808				5.41416	7.13317e-13	0.713317
				4.58664	9.94651e-13								-5.41112	-8.86471e-13	-0.886471				5.41184	9.44583e-13	0.944583
				4.58896	2.30834e-12								-5.4088	6.62057e-13	0.662057				5.40952	1.6956e-12	1.6956
				4.59128	3.46586e-12								-5.40648	5.54769e-13	0.554769				5.4072	1.5597e-12	1.5597
				4.5936	2.30238e-12								-5.40416	2.24559e-13	0.224559				5.40488	-1.60769e-12	-1.60769
				4.59592	2.48e-12								-5.40184	2.19791e-13	0.219791				5.40256	5.92916e-13	0.592916
				4.59824	2.51338e-12								-5.39952	-8.18085e-14	-0.0818085				5.40024	5.29735e-13	0.529735
				4.60056	2.81736e-12								-5.3972	-5.57454e-13	-0.557454				5.39792	1.71348e-12	1.71348
				4.60288	2.47642e-12								-5.39488	1.1675e-12	1.1675				5.3956	2.14144e-12	2.14144
				4.6052	1.85534e-12								-5.39256	1.43811e-12	1.43811				5.39328	4.47481e-13	0.447481
				4.60752	3.13803e-12								-5.39024	-2.4505e-12	-2.4505				5.39096	1.61692e-12	1.61692
				4.60984	3.03551e-12								-5.38792	-1.63272e-12	-1.63272				5.38864	2.40728e-12	2.40728
				4.61216	4.17873e-12								-5.3856	4.91588e-13	0.491588				5.38632	2.77325e-12	2.77325
				4.61448	2.74464e-12								-5.38328	1.05783e-12	1.05783				5.384	1.76594e-12	1.76594
				4.6168	4.09052e-12								-5.38096	2.39417e-12	2.39417				5.38168	-1.32159e-12	-1.32159
				4.61912	1.91614e-12								-5.37864	9.86307e-13	0.986307				5.37936	1.98766e-12	1.98766
				4.62144	1.29148e-12								-5.37632	-2.21923e-12	-2.21923				5.37704	8.95708e-13	0.895708
				4.62376	2.7208e-12								-5.374	1.15678e-12	1.15678				5.37472	-3.38109e-13	-0.338109
				4.62608	2.48119e-12								-5.37168	7.68154e-13	0.768154				5.3724	1.8522e-13	0.18522
				4.6284	3.21314e-12								-5.36936	-1.66447e-13	-0.166447				5.37008	1.65149e-12	1.65149
				4.63072	2.10211e-12								-5.36704	-3.95329e-13	-0.395329				5.36776	2.0723e-12	2.0723
				4.63304	2.08184e-12								-5.36472	6.37023e-13	0.637023				5.36544	4.33612e-14	0.0433612
				4.63536	3.33235e-12								-5.3624	4.51057e-13	0.451057				5.36312	1.68531e-13	0.168531
[truncated: 84,207 more rows]
