# Supplementary material for: Long-distance electron transport in multicellular freshwater cable bacteria
Source: eLife. 2024 Aug 29;12:RP91097. doi: 10.7554/eLife.91097 (PMC11361709; doi:10.7554/eLife.91097)
Supplement: Figure 6—source data 2. [file elife-91097-fig6-data2.xlsx]

## Sheet: CablesonAuIDA10003
CablesonAuIDA10003Bias_Ext	CablesonAuIDA10003Cur_Ext	CablesonAuIDA10003Bias_Ret	CablesonAuIDA10003Cur_Ret	CablesonAuIDA10003Bias_Towd	CablesonAuIDA10003Cur_Towd					-9.99992	-1.08423e-12	-1.08423					9.9992	1.56936e-12	1.56936
0	-1.86386e-12	-0.00440121	7.39668e-13	0	-1.86386e-12					-9.99776	1.95799e-12	1.95799					9.99848	5.32243e-13	0.532243
				0.00231862	7.45628e-13					-9.99544	-9.95658e-14	-0.0995658					9.99616	-1.86506e-12	-1.86506
				0.00463963	2.47655e-12					-9.99312	-5.03685e-13	-0.503685					9.99384	-3.79708e-13	-0.379708
				0.00695944	1.23319e-12					-9.9908	2.65417e-12	2.65417					9.99152	9.30402e-13	0.930402
				0.00927925	1.81768e-13					-9.98848	1.69215e-12	1.69215					9.9892	-1.27735e-12	-1.27735
				0.0116003	2.12965e-12					-9.98616	1.82447e-12	1.82447					9.98688	-1.72283e-13	-0.172283
				0.0139189	-1.4204e-12					-9.98384	3.02849e-12	3.02849					9.98456	-3.04761e-12	-3.04761
				0.0162399	5.56085e-13					-9.98152	2.1225e-12	2.1225					9.98224	-2.79608e-12	-2.79608
				0.0185585	1.23081e-12					-9.9792	3.06938e-13	0.306938					9.97992	-3.8686e-13	-0.38686
				0.0208795	7.9212e-13					-9.97688	2.22621e-12	2.22621					9.9776	-1.98307e-12	-1.98307
				0.0232005	-5.35872e-13					-9.97456	7.65894e-13	0.765894					9.97528	-2.99837e-13	-0.299837
				0.0255203	-2.09036e-12					-9.97224	1.59678e-12	1.59678					9.97296	1.89242e-12	1.89242
				0.0278389	-3.53482e-13					-9.96992	-5.84748e-13	-0.584748					9.97064	-6.97635e-14	-0.0697635
				0.03016	3.57006e-13					-9.9676	-1.42637e-12	-1.42637					9.96832	-1.50826e-13	-0.150826
				0.0324798	2.37522e-12					-9.96528	1.1569e-12	1.1569					9.966	-9.38799e-13	-0.938799
				0.0347996	2.20475e-12					-9.96296	1.07345e-12	1.07345					9.96368	-1.0747e-12	-1.0747
				0.0371206	2.02117e-12					-9.96064	1.43585e-12	1.43585					9.96136	3.91576e-13	0.391576
				0.0394392	-1.19831e-13					-9.95832	2.24766e-12	2.24766					9.95904	8.57685e-13	0.857685
				0.0417602	7.32876e-14					-9.956	1.55625e-12	1.55625					9.95672	1.32379e-12	1.32379
				0.0440788	-2.54538e-13					-9.95368	6.35955e-13	0.635955					9.9544	2.17531e-13	0.217531
				0.0463998	1.83997e-12					-9.95136	8.2669e-13	0.82669					9.95208	-2.91493e-13	-0.291493
				0.0487185	1.56698e-12					-9.94904	3.86808e-13	0.386808					9.94976	3.75249e-14	0.0375249
				0.0510395	-8.1959e-13					-9.94672	1.46565e-12	1.46565					9.94744	8.56493e-13	0.856493
				0.0533593	3.47469e-13					-9.9444	9.12521e-13	0.912521					9.94512	1.13783e-12	1.13783
				0.0556803	1.04723e-12					-9.94208	1.57413e-12	1.57413					9.9428	2.27068e-13	0.227068
				0.0580001	1.51572e-12					-9.93976	6.896e-13	0.6896					9.94048	-1.25232e-12	-1.25232
				0.0603199	2.26793e-12					-9.93744	1.10445e-12	1.10445					9.93816	-2.40269e-12	-2.40269
				0.0626385	2.16541e-12					-9.93512	1.26776e-12	1.26776					9.93584	-1.58968e-12	-1.58968
				0.0649595	8.82719e-13					-9.9328	2.32198e-14	0.0232198					9.93352	-6.92036e-13	-0.692036
				0.0672805	-1.36521e-13					-9.93048	5.60854e-13	0.560854					9.9312	-1.44067e-12	-1.44067
				0.0695992	-3.42753e-13					-9.92816	3.48661e-13	0.348661					9.92888	1.96073e-13	0.196073
				0.0719202	2.07243e-12					-9.92584	2.24528e-12	2.24528					9.92656	-1.5917e-13	-0.15917
				0.0742388	1.25704e-12					-9.92352	-4.79843e-13	-0.479843					9.92424	-1.34649e-12	-1.34649
				0.0765598	1.84712e-12					-9.9212	4.46413e-13	0.446413					9.92192	8.52086e-14	0.0852086
				0.0788784	-6.53889e-13					-9.91888	1.45135e-12	1.45135					9.9196	1.12988e-14	0.0112988
				0.0811994	-1.87221e-12					-9.91656	-2.23543e-13	-0.223543					9.91728	-1.17722e-12	-1.17722
				0.0835204	1.44813e-13					-9.91424	2.46582e-12	2.46582					9.91496	-1.94016e-12	-1.94016
				0.0858402	8.15962e-13					-9.91192	9.41131e-13	0.941131					9.91264	-2.04983e-12	-2.04983
				0.0881588	8.58877e-13					-9.9096	-4.25007e-13	-0.425007					9.91032	-3.19543e-12	-3.19543
				0.0904799	4.59526e-13					-9.90728	5.97809e-13	0.597809					9.908	-2.02122e-12	-2.02122
				0.0927997	2.40621e-12					-9.90496	2.68516e-12	2.68516					9.90568	-2.39673e-12	-2.39673
				0.0951195	7.95696e-13					-9.90264	2.02236e-12	2.02236					9.90336	-1.44067e-12	-1.44067
				0.0974405	5.62046e-13					-9.90032	1.68977e-12	1.68977					9.90104	-1.26186e-12	-1.26186
				0.0997591	-2.85532e-13					-9.898	1.41916e-12	1.41916					9.89872	-9.13765e-13	-0.913765
				0.10208	7.68639e-14					-9.89568	3.51844e-12	3.51844					9.8964	-2.39673e-12	-2.39673
				0.104399	2.32396e-12					-9.89336	1.72231e-13	0.172231					9.89408	4.82537e-14	0.0482537
				0.10672	7.77815e-13					-9.89104	-5.06069e-13	-0.506069					9.89176	-1.49789e-12	-1.49789
				0.109038	-5.97861e-13					-9.88872	9.30402e-13	0.930402					9.88944	-2.41819e-12	-2.41819
				0.111361	1.5435e-13					-9.8864	-9.59895e-14	-0.0959895					9.88712	-2.40388e-12	-2.40388
				0.113679	2.68791e-13					-9.88408	-1.06755e-12	-1.06755					9.8848	-9.29262e-13	-0.929262
				0.116	1.99375e-12					-9.88176	2.23491e-13	0.223491					9.88248	-1.99976e-12	-1.99976
				0.11832	-1.74668e-13					-9.87944	1.45612e-12	1.45612					9.88016	-1.26662e-12	-1.26662
				0.12064	1.05438e-12					-9.87712	1.34644e-12	1.34644					9.87784	-1.64571e-12	-1.64571
				0.122958	-9.90059e-13					-9.8748	1.30234e-12	1.30234					9.87552	-1.36521e-13	-0.136521
				0.125279	6.50261e-13					-9.87248	-1.3056e-13	-0.13056					9.8732	-1.43709e-12	-1.43709
				0.1276	5.7039e-13					-9.87016	-2.12815e-13	-0.212815					9.87088	-1.69816e-12	-1.69816
				0.129919	4.48797e-13					-9.86784	8.44572e-13	0.844572					9.86856	1.42274e-12	1.42274
				0.13224	1.57926e-13					-9.86552	3.01895e-12	3.01895					9.86624	-2.14043e-12	-2.14043
				0.134559	3.79656e-13					-9.8632	3.02849e-12	3.02849					9.86392	-1.01152e-12	-1.01152
				0.13688	1.91149e-12					-9.86088	1.55744e-12	1.55744					9.8616	-6.53889e-13	-0.653889
				0.139198	1.86977e-12					-9.85856	1.83997e-12	1.83997					9.85928	-2.07248e-12	-2.07248
				0.141521	2.67599e-13					-9.85624	1.4728e-12	1.4728					9.85696	-2.11897e-12	-2.11897
				0.14384	1.55542e-13					-9.85392	1.87573e-12	1.87573					9.85464	7.59933e-13	0.759933
				0.14616	4.32071e-12					-9.8516	5.88272e-13	0.588272					9.85232	4.9052e-13	0.49052
				0.148479	5.88272e-13					-9.84928	1.263e-12	1.263					9.85	-3.19901e-12	-3.19901
				0.1508	9.64973e-13					-9.84696	5.42972e-13	0.542972					9.84768	-1.77684e-12	-1.77684
				0.15312	-1.65131e-13					-9.84464	-5.1799e-13	-0.51799					9.84536	-5.95476e-13	-0.595476
				0.155439	4.94096e-13					-9.84232	2.59814e-12	2.59814					9.84304	-1.42279e-12	-1.42279
				0.15776	-2.62883e-13					-9.84	1.01146e-12	1.01146					9.84072	-2.39434e-12	-2.39434
				0.160079	7.00329e-13					-9.83768	6.39532e-13	0.639532					9.8384	-1.4359e-12	-1.4359
				0.1624	1.94726e-12					-9.83536	2.2826e-13	0.22826					9.83608	4.05882e-13	0.405882
				0.164719	1.03411e-12					-9.83304	-1.97711e-12	-1.97711					9.83376	1.73423e-13	0.173423
				0.16704	6.57413e-13					-9.83072	7.52781e-13	0.752781					9.83144	-2.48577e-13	-0.248577
				0.169358	1.85904e-12					-9.8284	4.28531e-13	0.428531					9.82912	-2.27752e-12	-2.27752
				0.17168	1.474e-12					-9.82608	1.01027e-12	1.01027					9.8268	8.02848e-13	0.802848
				0.173999	1.57652e-12					-9.82376	8.48148e-13	0.848148					9.82448	5.26283e-13	0.526283
				0.17632	7.52781e-13					-9.82144	1.28803e-12	1.28803					9.82216	-2.9582e-12	-2.9582
				0.17864	-6.69386e-13					-9.81912	-9.59895e-14	-0.0959895					9.81984	-6.8846e-13	-0.68846
				0.18096	2.32038e-12					-9.8168	4.77407e-13	0.477407					9.81752	-7.83827e-13	-0.783827
				0.183278	1.28445e-12					-9.81448	2.67563e-12	2.67563					9.8152	-2.39434e-12	-2.39434
				0.185599	1.10922e-12					-9.81216	8.57685e-13	0.857685					9.81288	-3.49226e-12	-3.49226
				0.18792	1.16524e-12					-9.80984	9.23611e-14	0.0923611					9.81056	-1.34053e-12	-1.34053
				0.190239	1.3536e-12					-9.80752	-7.50449e-13	-0.750449					9.80824	6.78871e-13	0.678871
				0.19256	1.91269e-12					-9.8052	1.05915e-12	1.05915					9.80592	5.07209e-13	0.507209
				0.194879	-2.47541e-12					-9.80288	-8.02901e-13	-0.802901					9.8036	-7.86211e-13	-0.786211
				0.1972	-1.05562e-12					-9.80056	4.60718e-13	0.460718					9.80128	-2.66257e-12	-2.66257
				0.199519	1.39413e-12					-9.79824	2.78328e-13	0.278328					9.79896	-2.38362e-12	-2.38362
				0.20184	1.2022e-12					-9.79592	3.56493e-12	3.56493					9.79664	-9.63833e-13	-0.963833
				0.20416	-4.11533e-14					-9.7936	2.0617e-12	2.0617					9.79432	-2.28706e-12	-2.28706
				0.20648	2.79245e-12					-9.79128	2.33028e-13	0.233028					9.792	-1.13073e-12	-1.13073
				0.208799	1.24631e-12					-9.78896	-8.56545e-13	-0.856545					9.78968	-1.50027e-12	-1.50027
				0.21112	2.21107e-13					-9.78664	-2.36657e-13	-0.236657					9.78736	-1.56584e-12	-1.56584
				0.213439	-5.75211e-13					-9.78432	2.22978e-12	2.22978					9.78504	-1.52531e-12	-1.52531
				0.215759	-6.84883e-13					-9.782	1.0067e-12	1.0067					9.78272	-2.14162e-12	-2.14162
				0.21808	1.24392e-12					-9.77968	2.99749e-12	2.99749					9.7804	-2.58114e-13	-0.258114
				0.220399	1.37744e-12					-9.77736	2.86398e-12	2.86398					9.77808	-6.12166e-13	-0.612166
				0.22272	4.05882e-13					-9.77504	3.18859e-13	0.318859					9.77576	7.90928e-13	0.790928
				0.225039	9.68549e-13					-9.77272	2.27151e-12	2.27151					9.77344	-1.89843e-12	-1.89843
				0.22736	1.50141e-12					-9.7704	2.61125e-12	2.61125					9.77112	-3.77323e-13	-0.377323
				0.229681	1.09253e-12					-9.76808	1.33333e-12	1.33333					9.7688	3.97537e-13	0.397537
				0.232	2.29452e-13					-9.76576	-3.17719e-13	-0.317719					9.76648	-4.94149e-13	-0.494149
				0.234319	7.81391e-13					-9.76344	1.32856e-12	1.32856					9.76416	-1.44186e-12	-1.44186
				0.23664	-1.69816e-12					-9.76112	2.76503e-12	2.76503					9.76184	-7.99324e-13	-0.799324
				0.23896	1.13663e-12					-9.7588	3.2526e-12	3.2526					9.75952	1.35276e-13	0.135276
				0.24128	1.99613e-12					-9.75648	2.39548e-12	2.39548					9.7572	2.84288e-13	0.284288
				0.243598	1.07226e-12					-9.75416	1.61705e-12	1.61705					9.75488	5.62046e-13	0.562046
				0.245919	2.11892e-12					-9.75184	5.94232e-13	0.594232					9.75256	-8.39855e-13	-0.839855
				0.24824	-5.18821e-14					-9.74952	2.00805e-12	2.00805					9.75024	-1.5718e-12	-1.5718
				0.250559	1.01385e-12					-9.7472	-2.00894e-13	-0.200894					9.74792	-1.32265e-12	-1.32265
				0.25288	-8.55353e-13					-9.74488	3.53429e-13	0.353429					9.7456	-2.35977e-12	-2.35977
				0.255198	4.04689e-13					-9.74256	-4.14278e-13	-0.414278					9.74328	-1.14742e-12	-1.14742
				0.257519	-1.27616e-12					-9.74024	-7.63562e-13	-0.763562					9.74096	-1.29404e-12	-1.29404
				0.259839	-5.47793e-13					-9.73792	5.08402e-13	0.508402					9.73864	8.62453e-13	0.862453
				0.26216	4.89328e-13					-9.7356	2.02034e-13	0.202034					9.73632	-3.03331e-12	-3.03331
				0.26448	1.33214e-12					-9.73328	-1.2249e-12	-1.2249					9.734	-3.19782e-12	-3.19782
				0.2668	2.80318e-12					-9.73096	2.26912e-12	2.26912					9.73168	-6.4316e-13	-0.64316
				0.269119	1.37982e-12					-9.72864	1.76606e-12	1.76606					9.72936	-4.88188e-13	-0.488188
				0.27144	-9.43568e-13					-9.72632	2.4527e-12	2.4527					9.72704	-1.29643e-12	-1.29643
				0.273761	-8.00516e-13					-9.724	1.90911e-12	1.90911					9.72472	-7.82635e-13	-0.782635
				0.276079	6.20458e-13					-9.72168	3.25975e-12	3.25975					9.7224	-1.56465e-12	-1.56465
				0.2784	3.22435e-13					-9.71936	2.5135e-12	2.5135					9.72008	-8.33895e-13	-0.833895
				0.280719	1.03054e-12					-9.71704	1.06034e-12	1.06034					9.71776	1.8296e-13	0.18296
				0.28304	7.13442e-13					-9.71472	1.14259e-12	1.14259					9.71544	-1.58849e-12	-1.58849
				0.285358	1.3977e-12					-9.7124	2.74477e-12	2.74477					9.71312	-8.47008e-13	-0.847008
				0.287679	-7.94556e-13					-9.71008	-1.40848e-12	-1.40848					9.7108	-6.52697e-13	-0.652697
				0.29	1.83997e-12					-9.70776	-1.82333e-12	-1.82333					9.70848	2.79881e-14	0.0279881
				0.29232	1.06988e-12					-9.70544	7.42052e-13	0.742052					9.70616	-4.59578e-13	-0.459578
				0.294639	1.83162e-12					-9.70312	1.57413e-12	1.57413					9.70384	7.25362e-13	0.725362
				0.29696	-1.54402e-13					-9.7008	-5.32296e-13	-0.532296					9.70152	-1.67432e-12	-1.67432
				0.29928	5.47741e-13					-9.69848	-3.87691e-14	-0.0387691					9.6992	-1.4812e-12	-1.4812
				0.3016	1.58009e-12					-9.69616	1.19385e-12	1.19385					9.69688	-2.00691e-12	-2.00691
				0.303921	-2.24736e-13					-9.69384	2.15468e-12	2.15468					9.69456	5.16746e-13	0.516746
				0.306239	1.77e-13					-9.69152	9.7451e-13	0.97451					9.69224	-9.11381e-13	-0.911381
				0.30856	-1.05562e-12					-9.6892	1.82328e-12	1.82328					9.68992	-1.78757e-12	-1.78757
				0.310879	-2.3308e-13					-9.68688	5.72775e-13	0.572775					9.6876	-1.8579e-12	-1.8579
				0.3132	1.1724e-12					-9.68456	9.71295e-14	0.0971295					9.68528	-1.99499e-12	-1.99499
				0.315518	1.97348e-12					-9.68224	2.41098e-12	2.41098					9.68296	-1.1641e-12	-1.1641
				0.317841	1.59559e-12					-9.67992	3.96309e-12	3.96309					9.68064	-1.1498e-12	-1.1498
				0.320159	1.86023e-12					-9.6776	1.29995e-12	1.29995					9.67832	5.65984e-14	0.0565984
				0.32248	2.77576e-12					-9.67528	1.4839e-13	0.14839					9.676	-1.21298e-12	-1.21298
				0.3248	-6.85714e-14					-9.67296	1.48592e-12	1.48592					9.67368	2.87864e-13	0.287864
				0.32712	2.53294e-13					-9.67064	2.99785e-13	0.299785					9.67136	2.6796e-14	0.026796
				0.329438	1.55267e-12					-9.66832	-2.18775e-13	-0.218775					9.66904	3.83232e-13	0.383232
				0.331759	5.99001e-13					-9.666	-4.52425e-13	-0.452425					9.66672	3.21243e-13	0.321243
				0.33408	1.09491e-12					-9.66368	1.82686e-12	1.82686					9.6644	-9.56681e-13	-0.956681
				0.336399	7.09035e-14					-9.66136	9.84047e-13	0.984047					9.66208	-6.41968e-13	-0.641968
				0.33872	2.74596e-12					-9.65904	2.41217e-12	2.41217					9.65976	-9.65025e-13	-0.965025
				0.341039	-5.01301e-13					-9.65672	2.52102e-13	0.252102					9.65744	-1.70055e-12	-1.70055
				0.34336	2.04262e-12					-9.6544	2.33469e-12	2.33469					9.65512	4.04689e-13	0.404689
				0.345678	1.22962e-12					-9.65208	8.62453e-13	0.862453					9.6528	-2.31924e-12	-2.31924
				0.348001	3.26011e-13					-9.64976	5.38204e-13	0.538204					9.65048	-6.59849e-13	-0.659849
				0.35032	1.17395e-13					-9.64744	1.474e-12	1.474					9.64816	6.91984e-13	0.691984
				0.35264	1.10802e-12					-9.64512	1.56579e-12	1.56579					9.64584	-6.82499e-13	-0.682499
				0.354959	-9.26878e-13					-9.6428	6.59797e-13	0.659797					9.64352	-1.92549e-13	-0.192549
				0.35728	5.51317e-13					-9.64048	2.38833e-12	2.38833					9.6412	-7.1707e-13	-0.71707
				0.3596	6.18074e-13					-9.63816	1.08895e-12	1.08895					9.63888	-1.80664e-12	-1.80664
				0.361919	6.87215e-13					-9.63584	1.65162e-12	1.65162					9.63656	6.58605e-13	0.658605
				0.36424	1.7446e-12					-9.63352	1.81136e-12	1.81136					9.63424	-1.66121e-12	-1.66121
				0.366559	1.85666e-12					-9.6312	1.30353e-12	1.30353					9.63192	-4.61962e-13	-0.461962
				0.36888	-9.41183e-13					-9.62888	4.77407e-13	0.477407					9.6296	-1.85396e-13	-0.185396
				0.371199	-3.43945e-13					-9.62656	-6.58257e-15	-0.00658257					9.62728	3.47469e-13	0.347469
				0.37352	1.79384e-13					-9.62424	1.67308e-12	1.67308					9.62496	5.40588e-13	0.540588
				0.375838	1.46088e-12					-9.62192	7.76622e-13	0.776622					9.62264	-2.43726e-12	-2.43726
				0.37816	8.39803e-13					-9.6196	2.23217e-12	2.23217					9.62032	-9.59065e-13	-0.959065
				0.380479	-8.58929e-13					-9.61728	2.90808e-12	2.90808					9.618	-1.26186e-12	-1.26186
				0.3828	-1.09103e-13					-9.61496	8.2669e-13	0.82669					9.61568	-1.48716e-12	-1.48716
				0.38512	1.87729e-13					-9.61264	3.09286e-12	3.09286					9.61336	-1.61114e-12	-1.61114
				0.38744	-7.44488e-13					-9.61032	2.84729e-12	2.84729					9.61104	-6.68194e-13	-0.668194
				0.389758	-1.2543e-14					-9.608	1.47638e-12	1.47638					9.60872	-4.63154e-13	-0.463154
				0.392079	6.31187e-13					-9.60568	1.01504e-12	1.01504					9.6064	-2.15235e-12	-2.15235
				0.3944	2.52423e-12					-9.60336	8.79142e-13	0.879142					9.60408	1.84152e-13	0.184152
				0.396719	5.26283e-13					-9.60104	1.80421e-12	1.80421					9.60176	-5.77595e-13	-0.577595
				0.39904	6.97114e-14					-9.59872	1.58129e-12	1.58129					9.59944	-2.19288e-12	-2.19288
				0.401359	2.37796e-13					-9.5964	1.88765e-12	1.88765					9.59712	-8.38663e-13	-0.838663
				0.40368	4.27339e-13					-9.59408	1.68977e-12	1.68977					9.5948	-6.75347e-13	-0.675347
				0.405998	1.18587e-13					-9.59176	2.64106e-12	2.64106					9.59248	-1.44544e-12	-1.44544
				0.40832	4.18995e-13					-9.58944	2.02832e-12	2.02832					9.59016	3.49853e-13	0.349853
				0.41064	7.15826e-13					-9.58712	2.93312e-12	2.93312					9.58784	-2.89109e-13	-0.289109
				0.41296	-5.83556e-13					-9.5848	2.04859e-12	2.04859					9.58552	2.08912e-12	2.08912
				0.415279	1.263e-12					-9.58248	2.67563e-12	2.67563					9.5832	-1.28093e-12	-1.28093
				0.4176	2.26078e-12					-9.58016	5.33836e-15	0.00533836					9.58088	-2.06294e-12	-2.06294
				0.419919	1.09372e-12					-9.57784	1.22008e-12	1.22008					9.57856	-2.91493e-13	-0.291493
				0.422239	1.99494e-12					-9.57552	5.82311e-13	0.582311					9.57624	3.24819e-13	0.324819
				0.42456	-1.43673e-13					-9.5732	1.24548e-13	0.124548					9.57392	-6.12166e-13	-0.612166
				0.426879	2.1368e-12					-9.57088	1.11041e-12	1.11041					9.5716	2.0561e-13	0.20561
				0.4292	-1.61193e-14					-9.56856	-1.74668e-13	-0.174668					9.56928	1.78192e-13	0.178192
				0.431519	4.83368e-13					-9.56624	-1.2543e-14	-0.012543					9.56696	-6.26471e-13	-0.626471
				0.43384	7.65894e-13					-9.56392	5.06379e-14	0.0506379					9.56464	-1.11046e-12	-1.11046
				0.436161	8.00464e-13					-9.5616	5.69198e-13	0.569198					9.56232	9.63781e-13	0.963781
				0.43848	-1.69899e-13					-9.55928	2.69983e-13	0.269983					9.56	-7.11109e-13	-0.711109
				0.440799	-1.79436e-13					-9.55696	7.12249e-13	0.712249					9.55768	-1.62902e-12	-1.62902
				0.44312	-2.50962e-13					-9.55464	2.95417e-15	0.00295417					9.55536	-2.89109e-13	-0.289109
				0.44544	-7.27799e-13					-9.55232	4.88136e-13	0.488136					9.55304	-3.77323e-13	-0.377323
				0.44776	1.38817e-12					-9.55	3.88e-13	0.388					9.55072	3.04554e-13	0.304554
				0.450078	2.01521e-12					-9.54768	-9.59895e-14	-0.0959895					9.5484	-1.02821e-12	-1.02821
				0.452399	-3.82092e-13					-9.54536	-8.12437e-13	-0.812437					9.54608	-4.03549e-13	-0.403549
				0.45472	-5.57329e-13					-9.54304	-1.92549e-13	-0.192549					9.54376	-3.28086e-14	-0.0328086
				0.457039	1.19862e-12					-9.54072	-5.46601e-13	-0.546601					9.54144	1.73423e-13	0.173423
				0.45936	2.08792e-12					-9.5384	-4.59578e-13	-0.459578					9.53912	-2.05937e-12	-2.05937
				0.461679	2.04024e-12					-9.53608	1.69334e-12	1.69334					9.5368	-8.04093e-13	-0.804093
				0.464	3.88e-13					-9.53376	1.69847e-13	0.169847					9.53448	9.68549e-13	0.968549
				0.466319	7.20594e-13					-9.53144	-2.19967e-13	-0.219967					9.53216	1.1569e-12	1.1569
				0.46864	9.81662e-13					-9.52912	-2.0391e-12	-2.0391					9.52984	3.85616e-13	0.385616
				0.47096	1.24035e-12					-9.5268	1.54314e-12	1.54314					9.52752	-6.51505e-13	-0.651505
				0.47328	-5.21567e-13					-9.52448	1.18432e-12	1.18432					9.5252	1.02219e-12	1.02219
				0.475599	-4.19838e-15					-9.52216	2.2429e-12	2.2429					9.52288	2.57072e-12	2.57072
				0.47792	1.42274e-12					-9.51984	1.77202e-12	1.77202					9.52056	-2.75912e-12	-2.75912
				0.480241	2.99511e-12					-9.51752	2.1523e-12	2.1523					9.51824	-1.46094e-12	-1.46094
				0.482559	1.78275e-12					-9.5152	1.44181e-12	1.44181					9.51592	-5.07262e-13	-0.507262
				0.48488	1.98302e-12					-9.51288	2.58384e-12	2.58384					9.5136	-6.19318e-13	-0.619318
				0.487199	1.56221e-12					-9.51056	-4.83058e-14	-0.0483058					9.51128	5.06379e-14	0.0506379
				0.48952	9.55436e-13					-9.50824	2.77219e-12	2.77219					9.50896	-1.5122e-12	-1.5122
				0.491838	2.85206e-12					-9.50592	8.7199e-13	0.87199					9.50664	-1.50504e-12	-1.50504
				0.494159	1.53599e-12					-9.5036	1.07226e-12	1.07226					9.50432	-7.13494e-13	-0.713494
				0.49648	3.20849e-12					-9.50128	1.4883e-12	1.4883					9.502	1.88765e-12	1.88765
				0.4988	6.52645e-13					-9.49896	-2.63634e-12	-2.63634					9.49968	1.49784e-12	1.49784
				0.501119	1.89719e-12					-9.49664	-8.39855e-13	-0.839855					9.49736	3.62966e-13	0.362966
				0.50344	5.8708e-13					-9.49432	8.88679e-13	0.888679					9.49504	-7.59985e-13	-0.759985
				0.50576	-5.79979e-13					-9.492	2.19044e-12	2.19044					9.49272	-2.37527e-12	-2.37527
				0.50808	3.09322e-13					-9.48968	3.93961e-13	0.393961					9.4904	-7.86211e-13	-0.786211
				0.510401	-6.58257e-15					-9.48736	-8.04923e-14	-0.0804923					9.48808	-8.8837e-14	-0.088837
				0.512719	6.86023e-13					-9.48504	4.29723e-13	0.429723					9.48576	-1.28093e-12	-1.28093
				0.51504	-5.70443e-13					-9.48272	-1.14145e-12	-1.14145					9.48344	1.04282e-13	0.104282
				0.517359	3.39486e-14					-9.4804	-2.36216e-12	-2.36216					9.48112	1.01898e-13	0.101898
				0.51968	7.82583e-13					-9.47808	2.65215e-13	0.265215					9.4788	-5.31103e-13	-0.531103
				0.521998	3.78463e-13					-9.47576	9.31595e-13	0.931595					9.47648	2.42565e-13	0.242565
				0.524319	2.05812e-12					-9.47344	5.37012e-13	0.537012					9.47416	-4.81036e-13	-0.481036
				0.526639	7.06289e-13					-9.47112	-8.1959e-13	-0.81959					9.47184	-8.72042e-13	-0.872042
				0.52896	1.38697e-12					-9.4688	6.60989e-13	0.660989					9.46952	-6.46736e-13	-0.646736
				0.53128	1.29637e-12					-9.46648	8.86295e-13	0.886295					9.4672	-1.43113e-12	-1.43113
				0.5336	7.95696e-13					-9.46416	1.81017e-12	1.81017					9.46488	-1.13192e-12	-1.13192
				0.535918	1.53956e-12					-9.46184	-3.96397e-13	-0.396397					9.46256	8.04041e-13	0.804041
				0.538239	-3.8686e-13					-9.45952	1.59082e-12	1.59082					9.46024	-1.52889e-12	-1.52889
				0.54056	2.44118e-14					-9.4572	2.96173e-12	2.96173					9.45792	-1.0139e-12	-1.0139
				0.542879	1.39413e-12					-9.45488	3.04756e-12	3.04756					9.4556	-3.43945e-13	-0.343945
				0.5452	3.39327e-12					-9.45256	2.81272e-12	2.81272					9.45328	7.65894e-13	0.765894
				0.547519	2.20117e-12					-9.45024	1.65519e-12	1.65519					9.45096	6.63374e-13	0.663374
				0.54984	1.78275e-12					-9.44792	1.91388e-12	1.91388					9.44864	1.37625e-12	1.37625
				0.552158	1.76487e-12					-9.4456	2.00686e-12	2.00686					9.44632	-6.24087e-13	-0.624087
				0.554481	-1.68707e-13					-9.44328	2.38476e-12	2.38476					9.444	3.57006e-13	0.357006
				0.5568	5.3582e-13					-9.44096	1.13663e-12	1.13663					9.44168	-1.25792e-13	-0.125792
				0.55912	1.96275e-12					-9.43864	6.84831e-13	0.684831					9.43936	-4.83058e-14	-0.0483058
				0.561439	4.72639e-13					-9.43632	2.37796e-13	0.237796					9.43704	-1.34411e-12	-1.34411
				0.56376	-1.8142e-15					-9.434	-1.16255e-13	-0.116255					9.43472	-9.90059e-13	-0.990059
				0.56608	-3.0103e-13					-9.43168	3.29671e-12	3.29671					9.4324	-2.14401e-12	-2.14401
				0.568399	1.72076e-12					-9.42936	1.44658e-12	1.44658					9.43008	-2.26441e-12	-2.26441
				0.57072	6.50261e-13					-9.42704	5.44164e-13	0.544164					9.42776	-2.03791e-12	-2.03791
				0.573039	2.00842e-13					-9.42472	-1.07827e-12	-1.07827					9.42544	-3.48988e-12	-3.48988
				0.57536	1.77083e-12					-9.4224	-1.42481e-13	-0.142481					9.42312	-1.55034e-12	-1.55034
				0.577679	2.78328e-13					-9.42008	1.08537e-12	1.08537					9.4208	-1.27616e-12	-1.27616
				0.58	2.52304e-12					-9.41776	1.36432e-12	1.36432					9.41848	-1.42875e-12	-1.42875
				0.582318	1.85344e-13					-9.41544	4.66678e-13	0.466678					9.41616	-9.97212e-13	-0.997212
				0.584641	1.23677e-12					-9.41312	6.81255e-13	0.681255					9.41384	-1.20225e-12	-1.20225
				0.586959	1.25823e-12					-9.4108	2.0617e-12	2.0617					9.41152	3.16475e-13	0.316475
				0.58928	-2.98645e-13					-9.40848	2.10342e-12	2.10342					9.4092	-2.1043e-13	-0.21043
				0.5916	7.4682e-13					-9.40616	3.11908e-12	3.11908					9.40688	3.51045e-13	0.351045
				0.59392	2.71973e-12					-9.40384	8.45764e-13	0.845764					9.40456	2.64023e-13	0.264023
				0.596238	2.56476e-12					-9.40152	1.78192e-13	0.178192					9.40224	-1.49551e-12	-1.49551
				0.598559	-6.07397e-13					-9.3992	-2.12815e-13	-0.212815					9.39992	-1.47047e-12	-1.47047
				0.60088	-2.81956e-13					-9.39688	1.34167e-12	1.34167					9.3976	-9.08997e-13	-0.908997
				0.603199	-6.40776e-13					-9.39456	4.98865e-13	0.498865					9.39528	5.90656e-13	0.590656
				0.60552	3.41509e-13					-9.39224	2.63033e-12	2.63033					9.39296	1.0508e-12	1.0508
				0.607839	-1.15063e-13					-9.38992	1.01898e-13	0.101898					9.39064	-9.66217e-13	-0.966217
				0.61016	1.24392e-12					-9.3876	-1.1641e-12	-1.1641					9.38832	-1.42875e-12	-1.42875
				0.612478	9.41131e-13					-9.38528	2.09186e-13	0.209186					9.386	-9.68602e-13	-0.968602
				0.6148	1.07703e-12					-9.38296	1.66473e-12	1.66473					9.38368	-1.09616e-12	-1.09616
				0.61712	3.32889e-12					-9.38064	1.44419e-12	1.44419					9.38136	-2.94271e-12	-2.94271
				0.61944	1.01146e-12					-9.37832	2.31085e-12	2.31085					9.37904	-1.51696e-12	-1.51696
				0.621759	1.263e-12					-9.376	3.00941e-12	3.00941					9.37672	-8.24358e-13	-0.824358
				0.62408	2.20117e-12					-9.37368	-1.96956e-14	-0.0196956					9.3744	-1.91512e-12	-1.91512
				0.6264	1.94368e-12					-9.37136	-1.23408e-13	-0.123408					9.37208	-2.07367e-12	-2.07367
				0.628719	-1.09973e-12					-9.36904	-1.16172e-12	-1.16172					9.36976	-1.50266e-12	-1.50266
				0.63104	-1.03417e-12					-9.36672	7.22978e-13	0.722978					9.36744	-2.69356e-12	-2.69356
				0.633359	-1.50504e-12					-9.3644	4.36876e-13	0.436876					9.36512	-4.3216e-13	-0.43216
				0.63568	-7.02765e-13					-9.36208	1.6242e-12	1.6242					9.3628	-2.81038e-12	-2.81038
				0.637999	8.63645e-13					-9.35976	3.05948e-12	3.05948					9.36048	-3.50418e-12	-3.50418
				0.64032	1.57056e-12					-9.35744	2.90332e-12	2.90332					9.35816	-2.21911e-12	-2.21911
				0.642641	-1.23444e-12					-9.35512	1.73983e-12	1.73983					9.35584	-3.809e-13	-0.3809
				0.64496	-1.7983e-12					-9.3528	1.96156e-12	1.96156					9.35352	-1.86589e-13	-0.186589
				0.647279	7.57549e-13					-9.35048	2.10819e-12	2.10819					9.3512	-6.07397e-13	-0.607397
				0.6496	5.15554e-13					-9.34816	-7.89788e-13	-0.789788					9.34888	-1.33338e-12	-1.33338
				0.65192	1.11518e-12					-9.34584	-8.87539e-13	-0.887539					9.34656	4.42836e-13	0.442836
				0.65424	9.73318e-13					-9.34352	-1.77052e-13	-0.177052					9.34424	1.51334e-12	1.51334
				0.656558	1.052e-12					-9.3412	1.26896e-12	1.26896					9.34192	7.31323e-13	0.731323
				0.658879	2.9653e-12					-9.33888	2.60291e-12	2.60291					9.3396	-6.08589e-13	-0.608589
				0.6612	2.83656e-12					-9.33656	7.2417e-13	0.72417					9.33728	4.20187e-13	0.420187
				0.663519	-3.71363e-13					-9.33424	-9.13765e-13	-0.913765					9.33496	-1.06158e-12	-1.06158
				0.66584	-8.8837e-14					-9.33192	1.76844e-12	1.76844					9.33264	-8.50584e-13	-0.850584
				0.668159	3.11706e-13					-9.3296	1.89957e-12	1.89957					9.33032	-4.8342e-13	-0.48342
				0.67048	9.61397e-13					-9.32728	6.12114e-13	0.612114					9.328	5.29859e-13	0.529859
				0.672799	1.7291e-12					-9.32496	6.29995e-13	0.629995					9.32568	-8.32703e-13	-0.832703
				0.67512	2.21309e-12					-9.32264	1.5634e-12	1.5634					9.32336	-6.33623e-13	-0.633623
				0.67744	2.62198e-12					-9.32032	1.11518e-12	1.11518					9.32104	-2.94628e-12	-2.94628
				0.67976	3.17869e-12					-9.318	5.7039e-13	0.57039					9.31872	-2.31888e-13	-0.231888
				0.682079	3.02849e-12					-9.31568	1.70765e-12	1.70765					9.3164	-2.78535e-12	-2.78535
				0.6844	7.30131e-13					-9.31336	2.12726e-12	2.12726					9.31408	-1.81976e-12	-1.81976
				0.686719	8.95832e-13					-9.31104	2.81272e-12	2.81272					9.31176	-2.7937e-12	-2.7937
				0.689039	1.0055e-12					-9.30872	1.90434e-12	1.90434					9.30944	-1.88413e-12	-1.88413
				0.69136	2.37403e-12					-9.3064	1.99017e-12	1.99017					9.30712	-1.38345e-12	-1.38345
				0.693679	1.38101e-12					-9.30408	2.30369e-12	2.30369					9.3048	1.48592e-12	1.48592
				0.696	2.13799e-12					-9.30176	2.31085e-12	2.31085					9.30248	6.97944e-13	0.697944
				0.698318	4.82175e-13					-9.29944	4.1065e-13	0.41065					9.30016	1.71957e-12	1.71957
				0.700639	1.19624e-12					-9.29712	1.14498e-12	1.14498					9.29784	-1.19629e-12	-1.19629
				0.70296	1.68023e-12					-9.2948	6.60989e-13	0.660989					9.29552	-1.33577e-12	-1.33577
				0.70528	1.34287e-12					-9.29248	9.459e-13	0.9459					9.2932	-5.75211e-13	-0.575211
				0.707599	1.8507e-12					-9.29016	2.78328e-13	0.278328					9.29088	-1.06755e-12	-1.06755
				0.70992	1.5646e-12					-9.28784	2.30131e-12	2.30131					9.28856	-2.35024e-12	-2.35024
				0.71224	2.37796e-13					-9.28552	2.59933e-12	2.59933					9.28624	-1.94016e-12	-1.94016
				0.71456	9.71295e-14					-9.2832	-2.06854e-13	-0.206854					9.28392	9.90007e-13	0.990007
				0.716881	-5.6925e-13					-9.28088	-1.0747e-12	-1.0747					9.2816	-2.53346e-13	-0.253346
				0.719199	7.09035e-14					-9.27856	2.31836e-13	0.231836					9.27928	1.48751e-14	0.0148751
				0.72152	1.01385e-12					-9.27624	1.7899e-12	1.7899					9.27696	-1.94135e-12	-1.94135
				0.723839	1.86023e-12					-9.27392	2.42767e-12	2.42767					9.27464	-2.73409e-12	-2.73409
				0.72616	4.60718e-13					-9.2716	-5.95476e-13	-0.595476					9.27232	-5.71635e-13	-0.571635
				0.728478	-8.935e-13					-9.26928	1.11995e-12	1.11995					9.27	-9.68602e-13	-0.968602
				0.730799	1.70645e-12					-9.26696	2.30608e-12	2.30608					9.26768	-2.30696e-13	-0.230696
				0.733119	1.15094e-12					-9.26464	7.7543e-13	0.77543					9.26536	5.97809e-13	0.597809
				0.73544	1.01743e-12					-9.26232	1.66354e-12	1.66354					9.26304	2.17531e-13	0.217531
				0.73776	1.43823e-12					-9.26	1.89004e-12	1.89004					9.26072	-2.81635e-12	-2.81635
				0.74008	9.22058e-13					-9.25768	1.75414e-12	1.75414					9.2584	-1.63617e-12	-1.63617
				0.742399	1.64804e-12					-9.25536	3.24819e-13	0.324819					9.25608	1.08895e-12	1.08895
				0.74472	3.26011e-13					-9.25304	-6.36008e-13	-0.636008					9.25376	-1.58968e-12	-1.58968
				0.747041	-5.54584e-14					-9.25072	1.07941e-12	1.07941					9.25144	-6.31239e-13	-0.631239
				0.749359	-4.34544e-13					-9.2484	4.1661e-13	0.41661					9.24912	2.17137e-12	2.17137
				0.75168	5.77543e-13					-9.24608	1.41916e-12	1.41916					9.2468	9.459e-13	0.9459
				0.753999	2.19283e-12					-9.24376	-1.28689e-12	-1.28689					9.24448	-1.85194e-12	-1.85194
				0.75632	1.56579e-12					-9.24144	4.70255e-13	0.470255					9.24216	-1.06718e-13	-0.106718
				0.758638	3.65672e-12					-9.23912	6.63374e-13	0.663374					9.23984	1.28326e-12	1.28326
				0.760961	2.62198e-12					-9.2368	1.84116e-12	1.84116					9.23752	-7.30183e-13	-0.730183
				0.76328	1.28803e-12					-9.23448	1.37744e-12	1.37744					9.2352	-3.34408e-13	-0.334408
				0.7656	3.99921e-13					-9.23216	7.93312e-13	0.793312					9.23288	-5.6329e-13	-0.56329
				0.767919	1.474e-12					-9.22984	1.13425e-12	1.13425					9.23056	-9.45952e-13	-0.945952
				0.77024	1.66592e-12					-9.22752	-7.00381e-13	-0.700381					9.22824	-8.17206e-13	-0.817206
				0.77256	2.05812e-12					-9.2252	-3.16527e-13	-0.316527					9.22592	-1.29643e-12	-1.29643
				0.774879	1.59917e-12					-9.22288	2.44118e-14	0.0244118					9.2236	-1.89128e-12	-1.89128
				0.7772	2.39906e-12					-9.22056	1.18551e-12	1.18551					9.22128	-8.23166e-13	-0.823166
				0.779519	1.25823e-12					-9.21824	2.23491e-13	0.223491					9.21896	1.49784e-12	1.49784
				0.78184	1.06511e-12					-9.21592	1.42989e-12	1.42989					9.21664	-9.42376e-13	-0.942376
				0.784159	1.10445e-12					-9.2136	2.0561e-13	0.20561					9.21432	-1.50981e-12	-1.50981
				0.78648	1.87454e-12					-9.21128	-2.46193e-13	-0.246193					9.212	-2.35977e-12	-2.35977
				0.788798	3.03445e-12					-9.20896	-5.46601e-13	-0.546601					9.20968	-2.12612e-12	-2.12612
				0.791121	-1.96956e-14					-9.20664	1.21412e-12	1.21412					9.20736	-1.55988e-12	-1.55988
				0.793439	-2.83148e-13					-9.20432	2.31442e-12	2.31442					9.20504	1.37982e-12	1.37982
				0.79576	9.42323e-13					-9.202	1.64923e-12	1.64923					9.20272	-7.99324e-13	-0.799324
				0.79808	1.83401e-12					-9.19968	1.25704e-12	1.25704					9.2004	-3.37663e-12	-3.37663
				0.8004	7.9808e-13					-9.19736	1.55506e-12	1.55506					9.19808	3.8717e-14	0.038717
				0.802718	1.08895e-12					-9.19504	1.86262e-12	1.86262					9.19576	6.53837e-13	0.653837
				0.805039	-1.87781e-13					-9.19272	2.52185e-12	2.52185					9.19344	1.10922e-12	1.10922
				0.80736	5.7039e-13					-9.1904	1.80659e-12	1.80659					9.19112	1.54791e-12	1.54791
				0.809679	1.79944e-12					-9.18808	3.53036e-12	3.53036					9.1888	-9.67409e-13	-0.967409
				0.812	-5.57329e-13					-9.18576	1.03292e-12	1.03292					9.18648	-6.74155e-13	-0.674155
				0.814319	-8.20782e-13					-9.18344	-4.47657e-13	-0.447657					9.18416	-1.9485e-12	-1.9485
				0.81664	2.66371e-12					-9.18112	1.78752e-12	1.78752					9.18184	-1.78519e-12	-1.78519
				0.818958	1.21054e-12					-9.1788	6.41916e-13	0.641916					9.17952	-5.68058e-13	-0.568058
				0.82128	1.35002e-12					-9.17648	2.92597e-12	2.92597					9.1772	-9.36415e-13	-0.936415
				0.8236	1.10445e-12					-9.17416	1.63731e-12	1.63731					9.17488	7.20956e-14	0.0720956
				0.82592	2.00329e-12					-9.17184	1.32379e-12	1.32379					9.17256	4.01113e-13	0.401113
				0.828239	-3.15335e-13					-9.16952	1.31664e-12	1.31664					9.17024	-1.42637e-12	-1.42637
				0.83056	1.86536e-13					-9.1672	1.34644e-12	1.34644					9.16792	-8.9946e-13	-0.89946
				0.83288	6.08537e-13					-9.16488	1.59321e-12	1.59321					9.1656	9.95137e-14	0.0995137
				0.835199	2.44794e-12					-9.16256	2.56357e-12	2.56357					9.16328	-5.88324e-13	-0.588324
				0.83752	-2.77188e-13					-9.16024	2.24683e-13	0.224683					9.16096	-1.36318e-12	-1.36318
				0.839839	1.36469e-13					-9.15792	5.6443e-13	0.56443					9.15864	-2.40984e-12	-2.40984
				0.84216	2.0772e-12					-9.1556	1.22127e-12	1.22127					9.15632	2.17531e-13	0.217531
				0.844479	1.30591e-12					-9.15328	2.4682e-12	2.4682					9.154	-1.87781e-13	-0.187781
				0.8468	8.11193e-13					-9.15096	2.85444e-12	2.85444					9.15168	2.92633e-13	0.292633
				0.849118	2.04739e-12					-9.14864	1.04007e-12	1.04007					9.14936	-3.89244e-13	-0.389244
				0.85144	2.34661e-12					-9.14632	2.20237e-12	2.20237					9.14704	-8.7085e-13	-0.87085
				0.853759	1.18551e-12					-9.144	3.13101e-12	3.13101					9.14472	-1.35484e-12	-1.35484
				0.85608	3.58198e-13					-9.14168	8.98216e-13	0.898216					9.1424	-1.22848e-12	-1.22848
				0.8584	9.07753e-13					-9.13936	5.66814e-13	0.566814					9.14008	-5.90708e-13	-0.590708
				0.86072	2.58264e-12					-9.13704	1.38101e-12	1.38101					9.13776	-6.96804e-13	-0.696804
				0.863038	4.10733e-12					-9.13472	2.43363e-12	2.43363					9.13544	4.8456e-13	0.48456
				0.865359	2.61364e-12					-9.1324	-1.33577e-12	-1.33577					9.13312	-1.09019e-12	-1.09019
				0.86768	7.34899e-13					-9.13008	-1.1653e-12	-1.1653					9.1308	-6.64618e-13	-0.664618
				0.869999	8.29075e-13					-9.12776	-4.13086e-13	-0.413086					9.12848	3.6535e-13	0.36535
				0.87232	4.20187e-13					-9.12544	-1.57418e-12	-1.57418					9.12616	-1.40097e-13	-0.140097
				0.874639	1.07858e-13					-9.12312	6.47876e-13	0.647876					9.12384	-1.70531e-12	-1.70531
				0.87696	5.01249e-13					-9.1208	5.42972e-13	0.542972					9.12152	-7.6833e-13	-0.76833
				0.879279	2.27389e-12					-9.11848	1.72231e-13	0.172231					9.1192	9.35532e-14	0.0935532
				0.8816	2.00567e-12					-9.11616	3.10514e-13	0.310514					9.11688	-1.01032e-12	-1.01032
				0.88392	1.09849e-12					-9.11384	7.59933e-13	0.759933					9.11456	-1.4669e-12	-1.4669
				0.88624	-1.43673e-13					-9.11152	1.95322e-12	1.95322					9.11224	-7.62369e-13	-0.762369
				0.888559	6.24035e-13					-9.1092	3.70119e-13	0.370119					9.10992	2.30644e-13	0.230644
				0.89088	5.58469e-13					-9.10688	-2.23543e-13	-0.223543					9.1076	-9.83737e-14	-0.0983737
				0.893199	3.57006e-13					-9.10456	1.50774e-13	0.150774					9.10528	1.64447e-12	1.64447
				0.895519	1.40247e-12					-9.10224	1.05557e-12	1.05557					9.10296	9.33979e-13	0.933979
				0.89784	2.00842e-13					-9.09992	7.59933e-13	0.759933					9.10064	-8.82771e-13	-0.882771
				0.900159	1.24869e-12					-9.0976	1.89838e-12	1.89838					9.09832	-5.99053e-13	-0.599053
				0.90248	1.19028e-12					-9.09528	2.72212e-12	2.72212					9.096	-3.63018e-13	-0.363018
				0.904799	3.90384e-13					-9.09296	-3.73747e-13	-0.373747					9.09368	-6.15742e-13	-0.615742
				0.90712	-5.59714e-13					-9.09064	1.55542e-13	0.155542					9.09136	-1.40252e-12	-1.40252
				0.909441	3.39124e-13					-9.08832	1.93689e-13	0.193689					9.08904	-2.01764e-12	-2.01764
				0.91176	1.08299e-12					-9.086	-1.26901e-12	-1.26901					9.08672	-2.3264e-12	-2.3264
				0.914079	7.89735e-13					-9.08368	2.3776e-12	2.3776					9.0844	-1.62783e-12	-1.62783
				0.9164	1.22163e-13					-9.08136	3.21207e-12	3.21207					9.08208	-2.08046e-13	-0.208046
				0.91872	1.34883e-12					-9.07904	1.25584e-12	1.25584					9.07976	-2.97453e-13	-0.297453
				0.92104	-1.36521e-13					-9.07672	9.81662e-13	0.981662					9.07744	-8.45816e-13	-0.845816
				0.923361	-1.12679e-13					-9.0744	2.36604e-13	0.236604					9.07512	-2.0689e-12	-2.0689
				0.925679	6.32379e-13					-9.07208	-1.59803e-12	-1.59803					9.0728	-9.04229e-13	-0.904229
				0.928	-4.73883e-13					-9.06976	1.8296e-13	0.18296					9.07048	-2.77462e-12	-2.77462
				0.930319	2.71175e-13					-9.06744	1.78156e-12	1.78156					9.06816	-1.45974e-12	-1.45974
				0.93264	-6.6581e-13					-9.06512	-7.75482e-13	-0.775482					9.06584	-2.33116e-12	-2.33116
				0.934958	7.99272e-13					-9.0628	6.99136e-13	0.699136					9.06352	-2.64468e-12	-2.64468
				0.937279	-1.74346e-12					-9.06048	1.232e-12	1.232					9.0612	-4.72369e-12	-4.72369
				0.939599	-1.24278e-12					-9.05816	4.48797e-13	0.448797					9.05888	-9.31647e-13	-0.931647
				0.94192	8.02848e-13					-9.05584	1.06392e-12	1.06392					9.05656	-1.20464e-12	-1.20464
				0.94424	-9.60257e-13					-9.05352	2.34303e-12	2.34303					9.05424	-1.22013e-12	-1.22013
				0.94656	5.07209e-13					-9.0512	7.65894e-13	0.765894					9.05192	-2.98085e-12	-2.98085
				0.948879	2.1225e-12					-9.04888	1.04246e-12	1.04246					9.0496	-6.90844e-13	-0.690844
				0.9512	3.42701e-13					-9.04656	1.5634e-12	1.5634					9.04728	-2.68283e-12	-2.68283
				0.953521	6.78871e-13					-9.04424	1.9556e-12	1.9556					9.04496	-4.69115e-13	-0.469115
				0.955839	1.47519e-12					-9.04192	1.06034e-12	1.06034					9.04264	-1.87698e-12	-1.87698
				0.95816	1.11398e-12					-9.0396	1.35598e-12	1.35598					9.04032	-1.1045e-12	-1.1045
				0.960479	5.54063e-14					-9.03728	2.11773e-12	2.11773					9.038	-1.75538e-12	-1.75538
				0.9628	-2.2712e-13					-9.03496	3.77271e-13	0.377271					9.03568	-2.50759e-12	-2.50759
				0.965118	-1.32742e-12					-9.03264	6.07345e-13	0.607345					9.03336	-3.16682e-12	-3.16682
				0.967439	5.88272e-13					-9.03032	1.84474e-12	1.84474					9.03104	6.01385e-13	0.601385
				0.96976	2.65417e-12					-9.028	2.38952e-12	2.38952					9.02872	-2.62203e-12	-2.62203
				0.97208	1.13544e-12					-9.02568	7.77815e-13	0.777815					9.0264	-1.06039e-12	-1.06039
				0.974399	8.58877e-13					-9.02336	1.59201e-12	1.59201					9.02408	-1.94933e-13	-0.194933
				0.97672	2.99511e-12					-9.02104	1.11041e-12	1.11041					9.02176	-1.30596e-12	-1.30596
				0.97904	2.15945e-12					-9.01872	1.18313e-12	1.18313					9.01944	-1.95208e-12	-1.95208
				0.981359	1.09372e-12					-9.0164	1.9965e-13	0.19965					9.01712	-2.17858e-12	-2.17858
				0.98368	1.49069e-12					-9.01408	1.04282e-13	0.104282					9.0148	-1.43673e-13	-0.143673
				0.985999	-3.27256e-13					-9.01176	1.5435e-13	0.15435					9.01248	-5.00109e-13	-0.500109
				0.98832	-1.19033e-12					-9.00944	1.34644e-12	1.34644					9.01016	-2.6578e-12	-2.6578
				0.990639	-1.24636e-12					-9.00712	2.38989e-13	0.238989					9.00784	-3.04606e-13	-0.304606
				0.99296	9.66165e-13					-9.0048	1.13544e-12	1.13544					9.00552	-1.32265e-12	-1.32265
				0.995278	5.69198e-13					-9.00248	2.20277e-14	0.0220277					9.0032	-7.28991e-13	-0.728991
				0.997601	1.10445e-12					-9.00016	3.03362e-13	0.303362					9.00088	-6.13358e-13	-0.613358
				0.999919	9.48284e-13					-8.99784	1.84593e-12	1.84593					8.99856	-1.30954e-12	-1.30954
				1.00224	1.3683e-14					-8.99552	1.1867e-12	1.1867					8.99624	-4.19838e-15	-0.00419838
				1.00456	1.57294e-12					-8.9932	7.87351e-13	0.787351					8.99392	9.006e-13	0.9006
				1.00688	1.49784e-12					-8.99088	1.14379e-12	1.14379					8.9916	-6.36008e-13	-0.636008
				1.0092	4.97673e-13					-8.98856	2.76861e-12	2.76861					8.98928	-6.18126e-13	-0.618126
				1.01152	9.60205e-13					-8.98624	1.92938e-12	1.92938					8.98696	-1.59683e-12	-1.59683
				1.01384	7.45628e-13					-8.98392	1.44896e-12	1.44896					8.98464	-2.21672e-12	-2.21672
				1.01616	1.87931e-12					-8.9816	8.70798e-13	0.870798					8.98232	-1.53961e-12	-1.53961
				1.01848	2.76384e-12					-8.97928	1.07345e-12	1.07345					8.98	-7.75482e-13	-0.775482
				1.0208	1.07345e-12					-8.97696	1.03411e-12	1.03411					8.97768	-1.37749e-12	-1.37749
				1.02312	3.20253e-12					-8.97464	2.04978e-12	2.04978					8.97536	-7.58793e-13	-0.758793
				1.02544	2.30846e-12					-8.97232	-6.14188e-14	-0.0614188					8.97304	-3.02019e-12	-3.02019
				1.02776	-3.04244e-14					-8.97	-1.78042e-12	-1.78042					8.97072	-1.91632e-12	-1.91632
				1.03008	1.50022e-12					-8.96768	-7.61177e-13	-0.761177					8.9684	-1.21775e-12	-1.21775
				1.0324	2.99153e-12					-8.96536	2.3422e-13	0.23422					8.96608	-4.19047e-13	-0.419047
				1.03472	1.80301e-12					-8.96304	1.55864e-12	1.55864					8.96376	-1.48716e-12	-1.48716
				1.03704	8.37419e-13					-8.96072	1.53837e-12	1.53837					8.96144	-1.94933e-13	-0.194933
				1.03936	1.58009e-12					-8.9584	1.1271e-12	1.1271					8.95912	-2.8986e-12	-2.8986
				1.04168	2.17256e-12					-8.95608	2.89056e-13	0.289056					8.9568	-2.51475e-12	-2.51475
				1.044	1.05796e-12					-8.95376	1.07465e-12	1.07465					8.95448	-1.28689e-12	-1.28689
				1.04632	7.87351e-13					-8.95144	1.80778e-12	1.80778					8.95216	5.71582e-13	0.571582
				1.04864	1.48949e-12					-8.94912	1.80063e-12	1.80063					8.94984	-7.4568e-13	-0.74568
				1.05096	6.02577e-13					-8.9468	2.01521e-12	2.01521					8.94752	-1.04847e-12	-1.04847
				1.05328	-1.12953e-12					-8.94448	6.01746e-14	0.0601746					8.9452	-2.37408e-12	-2.37408
				1.0556	-6.96804e-13					-8.94216	5.6443e-13	0.56443					8.94288	-1.51816e-12	-1.51816
				1.05792	-1.43673e-13					-8.93984	1.17395e-13	0.117395					8.94056	-3.58525e-12	-3.58525
				1.06024	-7.67138e-13					-8.93752	2.3633e-12	2.3633					8.93824	-1.42994e-12	-1.42994
				1.06256	-2.01645e-12					-8.9352	4.66678e-13	0.466678					8.93592	-1.94933e-13	-0.194933
				1.06488	-5.8594e-13					-8.93288	-2.03278e-13	-0.203278					8.9336	-8.27935e-13	-0.827935
				1.0672	1.6397e-12					-8.93056	-1.03774e-12	-1.03774					8.93128	-1.44544e-12	-1.44544
				1.06952	1.8209e-12					-8.92824	1.79467e-12	1.79467					8.92896	6.53045e-15	0.00653045
				1.07184	8.46956e-13					-8.92592	5.39396e-13	0.539396					8.92664	-5.46601e-13	-0.546601
				1.07416	1.61586e-12					-8.9236	6.443e-13	0.6443					8.92432	-5.90708e-13	-0.590708
				1.07648	1.75056e-12					-8.92128	1.18193e-12	1.18193					8.922	-4.77459e-13	-0.477459
				1.0788	9.459e-13					-8.91896	6.39532e-13	0.639532					8.91968	-1.99619e-12	-1.99619
				1.08112	1.52049e-12					-8.91664	1.11041e-12	1.11041					8.91736	9.14905e-13	0.914905
				1.08344	1.36194e-12					-8.91432	1.24631e-12	1.24631					8.91504	8.25498e-13	0.825498
				1.08576	-1.2702e-12					-8.912	-1.20583e-12	-1.20583					8.91272	-9.92443e-13	-0.992443
				1.08808	1.32141e-12					-8.90968	-2.50962e-13	-0.250962					8.9104	1.8209e-12	1.8209
				1.0904	5.09594e-13					-8.90736	2.47655e-12	2.47655					8.90808	-2.8434e-13	-0.28434
				1.09272	1.34525e-12					-8.90504	6.69334e-13	0.669334					8.90576	2.37796e-13	0.237796
				1.09504	3.30744e-12					-8.90272	1.63887e-13	0.163887					8.90344	-8.07669e-13	-0.807669
				1.09736	2.61125e-12					-8.9004	-2.18775e-13	-0.218775					8.90112	-4.62237e-12	-4.62237
				1.09968	6.35955e-13					-8.89808	1.49307e-12	1.49307					8.8988	-1.93539e-12	-1.93539
				1.102	1.44419e-12					-8.89576	2.07839e-12	2.07839					8.89648	-2.20361e-12	-2.20361
				1.10432	1.63016e-12					-8.89344	1.232e-12	1.232					8.89416	-4.85804e-13	-0.485804
				1.10664	5.40588e-13					-8.89112	1.61705e-12	1.61705					8.89184	-1.71485e-12	-1.71485
				1.10896	1.20697e-12					-8.8888	2.55642e-12	2.55642					8.88952	-2.57435e-12	-2.57435
				1.11128	1.63374e-12					-8.88648	2.05574e-12	2.05574					8.8872	-9.13765e-13	-0.913765
				1.1136	7.59933e-13					-8.88416	1.58129e-12	1.58129					8.88488	4.02305e-13	0.402305
				1.11592	1.44062e-12					-8.88184	-1.03178e-12	-1.03178					8.88256	-1.30835e-12	-1.30835
				1.11824	2.71735e-12					-8.87952	1.30508e-13	0.130508					8.88024	-1.62068e-12	-1.62068
				1.12056	2.1213e-12					-8.8772	2.05097e-12	2.05097					8.87792	-1.67515e-13	-0.167515
				1.12288	-7.28991e-13					-8.87488	2.06289e-12	2.06289					8.8756	-1.34137e-13	-0.134137
				1.1252	1.58725e-12					-8.87256	1.27969e-12	1.27969					8.87328	-2.23222e-12	-2.23222
				1.12752	1.99494e-12					-8.87024	2.5743e-12	2.5743					8.87096	-6.9442e-13	-0.69442
				1.12984	-8.26742e-13					-8.86792	1.67427e-12	1.67427					8.86864	-5.16798e-13	-0.516798
				1.13216	3.03921e-12					-8.8656	1.96633e-12	1.96633					8.86632	-1.35365e-12	-1.35365
				1.13448	-1.246e-13					-8.86328	-2.0999e-12	-2.0999					8.864	-1.2559e-12	-1.2559
				1.1368	-1.57978e-13					-8.86096	3.20051e-13	0.320051					8.86168	4.73831e-13	0.473831
				1.13912	-4.73883e-13					-8.85864	-2.51475e-12	-2.51475					8.85936	-2.20599e-12	-2.20599
				1.14144	4.63102e-13					-8.85632	1.04365e-12	1.04365					8.85704	-2.87476e-12	-2.87476
				1.14376	1.03531e-12					-8.854	2.14634e-12	2.14634					8.85472	-3.30153e-12	-3.30153
				1.14608	5.7039e-13					-8.85168	1.31902e-12	1.31902					8.8524	-1.10808e-12	-1.10808
				1.1484	6.82447e-13					-8.84936	7.76622e-13	0.776622					8.85008	-3.11079e-12	-3.11079
				1.15072	5.77543e-13					-8.84704	9.93583e-13	0.993583					8.84776	-3.02735e-12	-3.02735
				1.15304	1.32379e-12					-8.84472	8.80335e-13	0.880335					8.84544	-4.90572e-13	-0.490572
				1.15536	1.3536e-12					-8.8424	7.93312e-13	0.793312					8.84312	-2.25129e-12	-2.25129
				1.15768	4.96481e-13					-8.84008	6.97114e-14	0.0697114					8.8408	-2.32878e-12	-2.32878
				1.16	-6.87268e-13					-8.83776	1.34048e-12	1.34048					8.83848	-7.00381e-13	-0.700381
				1.16232	1.55267e-12					-8.83544	4.22571e-13	0.422571					8.83616	4.82537e-14	0.0482537
				1.16464	1.12948e-12					-8.83312	-9.24133e-14	-0.0924133					8.83384	-2.27514e-12	-2.27514
				1.16696	2.6283e-13					-8.8308	1.33214e-12	1.33214					8.83152	-4.29776e-13	-0.429776
				1.16928	-5.43024e-13					-8.82848	5.07209e-13	0.507209					8.8292	-1.57895e-12	-1.57895
				1.1716	1.42631e-12					-8.82616	3.46598e-12	3.46598					8.82688	-2.00453e-12	-2.00453
				1.17392	1.67784e-12					-8.82384	2.58503e-12	2.58503					8.82456	-2.16785e-12	-2.16785
				1.17624	1.88884e-12					-8.82152	1.73507e-12	1.73507					8.82224	-1.84241e-12	-1.84241
				1.17856	-7.86211e-13					-8.8192	7.45628e-13	0.745628					8.81992	-8.87539e-13	-0.887539
				1.18088	1.07345e-12					-8.81688	1.34525e-12	1.34525					8.8176	-1.28331e-12	-1.28331
				1.1832	1.58248e-12					-8.81456	6.82447e-13	0.682447					8.81528	-9.70986e-13	-0.970986
				1.18552	1.41082e-12					-8.81224	2.78328e-13	0.278328					8.81296	-7.44488e-13	-0.744488
				1.18784	1.29876e-12					-8.80992	1.99613e-12	1.99613					8.81064	-1.33219e-12	-1.33219
				1.19016	2.01759e-12					-8.8076	1.11398e-12	1.11398					8.80832	-1.41564e-12	-1.41564
				1.19248	-1.28176e-13					-8.80528	-1.92549e-13	-0.192549					8.806	-2.4611e-12	-2.4611
				1.1948	1.00074e-12					-8.80296	3.57006e-13	0.357006					8.80368	-2.66733e-12	-2.66733
				1.19712	8.29075e-13					-8.80064	2.75943e-13	0.275943					8.80136	-3.10245e-12	-3.10245
				1.19944	-1.34137e-13					-8.79832	6.81255e-13	0.681255					8.79904	-2.46587e-12	-2.46587
				1.20176	7.14634e-13					-8.796	2.45867e-12	2.45867					8.79672	-1.02225e-12	-1.02225
				1.20408	1.28922e-12					-8.79368	2.44436e-12	2.44436					8.7944	-1.79472e-12	-1.79472
				1.2064	1.90792e-12					-8.79136	2.1523e-12	2.1523					8.79208	-3.18911e-13	-0.318911
				1.20872	1.19982e-12					-8.78904	6.35955e-13	0.635955					8.78976	-1.73512e-12	-1.73512
				1.21104	-8.14822e-13					-8.78672	1.74937e-12	1.74937					8.78744	-1.37749e-12	-1.37749
				1.21336	3.8204e-13					-8.7844	1.48751e-14	0.0148751					8.78512	-4.94979e-14	-0.0494979
				1.21568	8.64837e-13					-8.78208	-9.18534e-13	-0.918534					8.7828	1.60513e-12	1.60513
				1.218	-6.15742e-13					-8.77976	5.69987e-16	0.000569987					8.78048	-3.57058e-13	-0.357058
				1.22032	-1.38583e-12					-8.77744	-1.19868e-12	-1.19868					8.77816	-1.9032e-12	-1.9032
				1.22264	1.09253e-12					-8.77512	-4.90572e-13	-0.490572					8.77584	-9.7933e-13	-0.97933
				1.22496	1.34644e-12					-8.7728	5.22707e-13	0.522707					8.77352	-2.15593e-12	-2.15593
				1.22728	2.77219e-12					-8.77048	4.77407e-13	0.477407					8.7712	-1.39179e-12	-1.39179
				1.2296	4.30641e-12					-8.76816	-1.00758e-13	-0.100758					8.76888	2.07994e-13	0.207994
				1.23192	3.59831e-12					-8.76584	-7.81081e-14	-0.0781081					8.76656	-2.39041e-13	-0.239041
				1.23424	1.29399e-12					-8.76352	2.19283e-12	2.19283					8.76424	-4.44713e-12	-4.44713
				1.23656	8.80335e-13					-8.7612	1.19624e-12	1.19624					8.76192	-2.1452e-12	-2.1452
				1.23888	-5.37064e-13					-8.75888	1.56936e-12	1.56936					8.7596	-1.1045e-12	-1.1045
				1.2412	6.02577e-13					-8.75656	-1.49272e-14	-0.0149272					8.75728	-1.74823e-12	-1.74823
				1.24352	7.61125e-13					-8.75424	2.0561e-13	0.20561					8.75496	-8.57737e-13	-0.857737
				1.24584	4.92904e-13					-8.75192	-7.64754e-13	-0.764754					8.75264	-1.62068e-12	-1.62068
				1.24816	1.5038e-12					-8.7496	-3.99612e-14	-0.0399612					8.75032	-1.96758e-12	-1.96758
				1.25048	1.42989e-12					-8.74728	9.84047e-13	0.984047					8.748	-1.05086e-12	-1.05086
				1.2528	-2.4464e-14					-8.74496	1.58605e-12	1.58605					8.74568	-3.40882e-12	-3.40882
				1.25512	2.93825e-13					-8.74264	9.78086e-13	0.978086					8.74336	-3.54471e-12	-3.54471
				1.25744	1.66473e-12					-8.74032	6.73272e-14	0.0673272					8.74104	-1.47047e-12	-1.47047
				1.25976	2.79007e-12					-8.738	1.89838e-12	1.89838					8.73872	-1.12596e-12	-1.12596
				1.26208	1.70526e-12					-8.73568	-2.22351e-13	-0.222351					8.7364	-5.3468e-13	-0.53468
				1.2644	2.81987e-12					-8.73336	2.52102e-13	0.252102					8.73408	-2.82946e-12	-2.82946
				1.26672	2.32992e-12					-8.73104	-2.75996e-13	-0.275996					8.73176	-1.92466e-12	-1.92466
				1.26904	2.65774e-12					-8.72872	-4.95341e-13	-0.495341					8.72944	-1.62068e-12	-1.62068
				1.27136	1.93653e-12					-8.7264	2.64023e-13	0.264023					8.72712	-1.55392e-12	-1.55392
				1.27368	7.56357e-13					-8.72408	-5.54584e-14	-0.0554584					8.7248	-1.1653e-12	-1.1653
				1.276	-1.08662e-12					-8.72176	-4.36928e-13	-0.436928					8.72248	-1.18639e-13	-0.118639
				1.27832	3.27565e-14					-8.71944	-4.73883e-13	-0.473883					8.72016	-2.2346e-12	-2.2346
				1.28064	-2.59306e-13					-8.71712	-1.80187e-12	-1.80187					8.71784	-1.59445e-12	-1.59445
				1.28296	1.2618e-12					-8.7148	2.20237e-12	2.20237					8.71552	5.08402e-13	0.508402
				1.28528	2.09031e-12					-8.71248	8.56493e-13	0.856493					8.7132	1.74616e-13	0.174616
				1.2876	3.66864e-12					-8.71016	-7.33398e-14	-0.0733398					8.71088	-2.39554e-12	-2.39554
				1.28992	2.37164e-12					-8.70784	9.95137e-14	0.0995137					8.70856	-1.14503e-12	-1.14503
				1.29224	1.97348e-12					-8.70552	4.73831e-13	0.473831					8.70624	-1.91393e-12	-1.91393
				1.29456	4.35684e-13					-8.7032	1.55542e-13	0.155542					8.70392	-1.59922e-12	-1.59922
				1.29688	-1.37351e-14					-8.70088	-2.48494e-12	-2.48494					8.7016	-2.31888e-13	-0.231888
				1.2992	1.37661e-13					-8.69856	1.32892e-13	0.132892					8.69928	-4.72691e-13	-0.472691
				1.30152	2.3422e-13					-8.69624	5.7039e-13	0.57039					8.69696	-9.37607e-13	-0.937607
				1.30384	1.41201e-12					-8.69392	3.75249e-14	0.0375249					8.69464	-3.1295e-13	-0.31295
				1.30616	1.0365e-12					-8.6916	1.0055e-12	1.0055					8.69232	-7.28991e-13	-0.728991
				1.30848	4.1065e-13					-8.68928	5.76351e-13	0.576351					8.69	-8.83963e-13	-0.883963
				1.3108	8.4934e-13					-8.68696	1.73423e-13	0.173423					8.68768	-1.40252e-12	-1.40252
				1.31312	1.19028e-12					-8.68464	1.78752e-12	1.78752					8.68536	-7.31375e-13	-0.731375
				1.31544	1.35717e-12					-8.68232	9.98352e-13	0.998352					8.68304	-2.39041e-13	-0.239041
				1.31776	4.60718e-13					-8.68	-6.72962e-13	-0.672962					8.68072	-2.16391e-13	-0.216391
				1.32008	-7.27799e-13					-8.67768	-1.27378e-12	-1.27378					8.6784	-1.42279e-12	-1.42279
				1.3224	5.79927e-13					-8.67536	3.29588e-13	0.329588					8.67608	-6.70578e-13	-0.670578
				1.32472	-8.83963e-13					-8.67304	1.69215e-12	1.69215					8.67376	-1.06397e-12	-1.06397
				1.32704	-1.11404e-12					-8.67072	2.54807e-12	2.54807					8.67144	-2.8378e-12	-2.8378
				1.32936	3.45085e-13					-8.6684	1.94607e-12	1.94607					8.66912	-2.41103e-12	-2.41103
				1.33168	4.22571e-13					-8.66608	9.24442e-13	0.924442					8.6668	-1.34769e-12	-1.34769
				1.334	2.41373e-13					-8.66376	-3.00629e-15	-0.00300629					8.66448	-1.4669e-12	-1.4669
				1.33632	4.14226e-13					-8.66144	2.70662e-12	2.70662					8.66216	-1.4359e-12	-1.4359
				1.33864	1.09491e-12					-8.65912	9.14905e-13	0.914905					8.65984	-2.91767e-12	-2.91767
				1.34096	1.38936e-12					-8.6568	1.05438e-12	1.05438					8.65752	-3.89042e-12	-3.89042
				1.34328	1.10326e-12					-8.65448	1.10445e-12	1.10445					8.6552	-7.54025e-13	-0.754025
				1.3456	4.72639e-13					-8.65216	4.13594e-12	4.13594					8.65288	-8.58929e-13	-0.858929
				1.34792	1.94487e-12					-8.64984	2.50873e-12	2.50873					8.65056	-5.59714e-13	-0.559714
				1.35024	2.3788e-12					-8.64752	2.30846e-12	2.30846					8.64824	-1.62902e-12	-1.62902
				1.35256	2.11653e-12					-8.6452	1.34763e-12	1.34763					8.64592	-4.42889e-13	-0.442889
				1.35488	2.50516e-12					-8.64288	7.63509e-13	0.763509					8.6436	2.0561e-13	0.20561
				1.3572	1.76844e-12					-8.64056	3.22435e-13	0.322435					8.64128	-6.69386e-13	-0.669386
				1.35952	7.14634e-13					-8.63824	2.01163e-12	2.01163					8.63896	9.13713e-13	0.913713
				1.36184	-9.90059e-13					-8.63592	2.69112e-12	2.69112					8.63664	1.46923e-12	1.46923
				1.36416	-1.55594e-13					-8.6336	1.03531e-12	1.03531					8.63432	-1.42756e-12	-1.42756
				1.36648	1.48353e-12					-8.63128	5.15554e-13	0.515554					8.632	-1.08781e-12	-1.08781
				1.3688	1.06272e-12					-8.62896	2.17531e-13	0.217531					8.62968	-6.26471e-13	-0.626471
				1.37112	1.84712e-12					-8.62664	1.58486e-12	1.58486					8.62736	-1.53842e-12	-1.53842
				1.37344	1.65043e-12					-8.62432	2.20952e-12	2.20952					8.62504	-4.73883e-13	-0.473883
				1.37576	1.75056e-12					-8.622	2.20277e-14	0.0220277					8.62272	6.20458e-13	0.620458
				1.37808	3.90467e-12					-8.61968	1.92222e-12	1.92222					8.6204	-7.57601e-13	-0.757601
				1.3804	2.14038e-12					-8.61736	1.92699e-12	1.92699					8.61808	1.17955e-12	1.17955
				1.38272	4.46413e-13					-8.61504	2.3478e-12	2.3478					8.61576	-1.17007e-12	-1.17007
				1.38504	5.37012e-13					-8.61272	1.72791e-12	1.72791					8.61344	-1.02463e-12	-1.02463
				1.38736	5.8708e-13					-8.6104	2.82583e-12	2.82583					8.61112	-6.58257e-15	-0.00658257
				1.38968	1.13306e-12					-8.60808	3.05352e-12	3.05352					8.6088	7.49204e-13	0.749204
				1.392	2.97484e-12					-8.60576	1.37505e-12	1.37505					8.60648	1.17717e-12	1.17717
				1.39432	6.39532e-13					-8.60344	1.48473e-12	1.48473					8.60416	-1.26186e-12	-1.26186
				1.39664	1.91388e-12					-8.60112	2.88424e-12	2.88424					8.60184	-8.95884e-13	-0.895884
				1.39896	1.28684e-12					-8.5988	2.29773e-12	2.29773					8.59952	-7.55217e-13	-0.755217
				1.40128	8.7199e-13					-8.59648	3.6901e-12	3.6901					8.5972	-2.26798e-12	-2.26798
				1.4036	1.03411e-12					-8.59416	2.97365e-12	2.97365					8.59488	-1.38941e-12	-1.38941
				1.40592	3.17667e-13					-8.59184	2.82345e-12	2.82345					8.59256	-1.31752e-13	-0.131752
				1.40824	2.41098e-12					-8.58952	1.98064e-12	1.98064					8.59024	-9.16149e-13	-0.916149
				1.41056	6.68142e-13					-8.5872	1.39532e-12	1.39532					8.58792	-1.13073e-12	-1.13073
				1.41288	-1.246e-13					-8.58488	2.26555e-12	2.26555					8.5856	-9.31647e-13	-0.931647
				1.4152	1.76248e-12					-8.58256	1.99613e-12	1.99613					8.58328	-1.6326e-12	-1.6326
				1.41752	1.65758e-12					-8.58024	2.72569e-12	2.72569					8.58096	1.23081e-12	1.23081
				1.41984	7.1821e-13					-8.57792	2.7853e-12	2.7853					8.57864	-1.0747e-12	-1.0747
				1.42216	1.99375e-12					-8.5756	1.9854e-12	1.9854					8.57632	-2.67091e-12	-2.67091
				1.42448	1.97265e-13					-8.57328	1.11637e-12	1.11637					8.574	-1.09854e-12	-1.09854
				1.4268	-1.1653e-12					-8.57096	-1.06993e-12	-1.06993					8.57168	-1.7586e-13	-0.17586
				1.42912	6.13667e-14					-8.56864	1.37625e-12	1.37625					8.56936	1.28124e-13	0.128124
				1.43144	-5.70443e-13					-8.56632	1.84831e-12	1.84831					8.56704	-1.40097e-13	-0.140097
				1.43376	1.23439e-12					-8.564	1.06988e-12	1.06988					8.56472	-1.47286e-12	-1.47286
				1.43608	1.15571e-12					-8.56168	2.17531e-13	0.217531					8.5624	-2.66459e-13	-0.266459
				1.4384	9.38747e-13					-8.55936	-1.57299e-12	-1.57299					8.56008	1.09253e-12	1.09253
				1.44072	3.85616e-13					-8.55704	1.41439e-12	1.41439					8.55776	-7.05149e-13	-0.705149
				1.44304	1.5038e-12					-8.55472	4.23763e-13	0.423763					8.55544	-1.44544e-12	-1.44544
				1.44536	1.06272e-12					-8.5524	2.69232e-12	2.69232					8.55312	-1.08423e-12	-1.08423
				1.44768	-3.46329e-13					-8.55008	1.01146e-12	1.01146					8.5508	-3.2598e-12	-3.2598
				1.45	1.54075e-12					-8.54776	5.65622e-13	0.565622					8.54848	-2.12136e-12	-2.12136
				1.45232	3.05746e-13					-8.54544	-5.52561e-13	-0.552561					8.54616	-3.77323e-13	-0.377323
				1.45464	3.61774e-13					-8.54312	4.21379e-13	0.421379					8.54384	-7.7429e-13	-0.77429
				1.45696	1.84514e-14					-8.5408	1.54671e-12	1.54671					8.54152	-9.70986e-13	-0.970986
				1.45928	8.58877e-13					-8.53848	1.79825e-12	1.79825					8.5392	-4.39312e-13	-0.439312
				1.4616	-6.68194e-13					-8.53616	2.42767e-12	2.42767					8.53688	-1.9795e-12	-1.9795
				1.46392	-1.50826e-13					-8.53384	1.84152e-13	0.184152					8.53456	-1.60041e-12	-1.60041
				1.46624	2.53973e-12					-8.53152	2.44198e-12	2.44198					8.53224	-1.38583e-12	-1.38583
				1.46856	2.13799e-12					-8.5292	1.76725e-12	1.76725					8.52992	-7.67138e-13	-0.767138
				1.47088	7.68639e-14					-8.52688	1.7756e-12	1.7756					8.5276	-1.14026e-12	-1.14026
				1.4732	1.44539e-12					-8.52456	-6.97635e-14	-0.0697635					8.52528	-9.93636e-13	-0.993636
				1.47552	1.9965e-13					-8.52224	1.29637e-12	1.29637					8.52296	2.02034e-13	0.202034
				1.47784	1.30353e-12					-8.51992	2.72367e-13	0.272367					8.52064	3.02169e-13	0.302169
				1.48016	1.89957e-12					-8.5176	4.65486e-13	0.465486					8.51832	4.46413e-13	0.446413
				1.48248	1.21531e-12					-8.51528	1.31902e-12	1.31902					8.516	-9.92443e-13	-0.992443
				1.4848	7.58741e-13					-8.51296	2.3323e-12	2.3323					8.51368	-6.45544e-13	-0.645544
				1.48712	3.94282e-12					-8.51064	3.66542e-13	0.366542					8.51136	-1.11487e-13	-0.111487
				1.48944	1.83758e-12					-8.50832	1.93689e-13	0.193689					8.50904	-1.1498e-12	-1.1498
				1.49176	8.89871e-13					-8.506	4.92904e-13	0.492904					8.50672	-3.11675e-12	-3.11675
				1.49408	4.22932e-14					-8.50368	1.66712e-12	1.66712					8.5044	-3.74856e-12	-3.74856
				1.4964	1.24909e-14					-8.50136	1.94964e-12	1.94964					8.50208	-2.57912e-12	-2.57912
				1.49872	1.01623e-12					-8.49904	8.85103e-13	0.885103					8.49976	1.75808e-13	0.175808
				1.50104	-1.15218e-12					-8.49672	2.81272e-12	2.81272					8.49744	-1.44865e-13	-0.144865
				1.50336	-1.10295e-13					-8.4944	2.57072e-12	2.57072					8.49512	-1.54402e-13	-0.154402
				1.50568	6.71718e-13					-8.49208	1.90315e-12	1.90315					8.4928	-1.00675e-12	-1.00675
				1.508	1.77679e-12					-8.48976	1.70407e-12	1.70407					8.49048	4.17802e-13	0.417802
				1.51032	1.62695e-13					-8.48744	1.28684e-12	1.28684					8.48816	-2.37849e-13	-0.237849
				1.51264	3.72503e-13					-8.48512	1.19624e-12	1.19624					8.48584	-9.14957e-13	-0.914957
				1.51496	3.74493e-12					-8.4828	1.3083e-12	1.3083					8.48352	-1.99261e-12	-1.99261
				1.51728	3.0869e-12					-8.48048	2.23574e-12	2.23574					8.4812	-2.12493e-12	-2.12493
				1.5196	7.53973e-13					-8.47816	1.232e-12	1.232					8.47888	-1.65763e-12	-1.65763
				1.52192	6.37148e-13					-8.47584	2.38356e-12	2.38356					8.47656	7.89735e-13	0.789735
				1.52424	1.87573e-12					-8.47352	1.43227e-12	1.43227					8.47424	-5.19183e-13	-0.519183
				1.52656	1.75056e-12					-8.4712	1.24988e-12	1.24988					8.47192	-2.63872e-12	-2.63872
				1.52888	-1.36795e-12					-8.46888	-2.48577e-13	-0.248577					8.4696	-1.06993e-12	-1.06993
				1.5312	2.37522e-12					-8.46656	8.39803e-13	0.839803					8.46728	1.43621e-13	0.143621
				1.53352	1.56698e-12					-8.46424	2.9212e-12	2.9212					8.46496	-3.22487e-13	-0.322487
				1.53584	1.33929e-12					-8.46192	1.00431e-12	1.00431					8.46264	-2.6268e-12	-2.6268
				1.53816	3.10514e-13					-8.4596	3.93961e-13	0.393961					8.46032	-2.43607e-12	-2.43607
				1.54048	1.49069e-12					-8.45728	-2.26321e-12	-2.26321					8.458	1.09849e-12	1.09849
				1.5428	8.64007e-14					-8.45496	-1.15063e-13	-0.115063					8.45568	-4.19838e-15	-0.00419838
				1.54512	8.95832e-13					-8.45264	-6.03821e-13	-0.603821					8.45336	3.06938e-13	0.306938
				1.54744	1.96037e-12					-8.45032	-6.59849e-13	-0.659849					8.45104	-1.24994e-12	-1.24994
				1.54976	2.65774e-12					-8.448	1.88921e-13	0.188921					8.44872	9.18481e-13	0.918481
				1.55208	2.38833e-12					-8.44568	4.70616e-14	0.0470616					8.4464	-2.37646e-12	-2.37646
				1.5544	1.40962e-12					-8.44336	8.82719e-13	0.882719					8.44408	-2.39315e-12	-2.39315
				1.55672	6.26419e-13					-8.44104	7.68639e-14	0.0768639					8.44176	-2.86284e-12	-2.86284
				1.55904	-1.2702e-12					-8.43872	1.62301e-12	1.62301					8.43944	-2.49448e-12	-2.49448
				1.56136	1.59118e-13					-8.4364	-3.17719e-13	-0.317719					8.43712	-1.55511e-12	-1.55511
				1.56368	8.75928e-14					-8.43408	-7.93002e-14	-0.0793002					8.4348	-1.27616e-12	-1.27616
				1.566	7.49204e-13					-8.43176	1.1414e-12	1.1414					8.43248	-6.45544e-13	-0.645544
				1.56832	7.61125e-13					-8.42944	3.50413e-12	3.50413					8.43016	-1.34888e-12	-1.34888
				1.57064	8.79142e-13					-8.42712	3.20968e-12	3.20968					8.42784	3.98729e-13	0.398729
				1.57296	4.71447e-13					-8.4248	2.63033e-12	2.63033					8.42552	-7.38528e-13	-0.738528
				1.57528	2.16422e-12					-8.42248	7.26555e-13	0.726555					8.4232	-2.48577e-13	-0.248577
				1.5776	5.06017e-13					-8.42016	7.08673e-13	0.708673					8.42088	-1.62783e-12	-1.62783
				1.57992	2.29654e-12					-8.41784	1.68655e-13	0.168655					8.41856	-2.1905e-12	-2.1905
				1.58224	2.9057e-12					-8.41552	1.263e-12	1.263					8.41624	-7.9694e-13	-0.79694
				1.58456	2.64023e-13					-8.4132	1.38936e-12	1.38936					8.41392	-1.30239e-12	-1.30239
				1.58688	6.80063e-13					-8.41088	3.09882e-12	3.09882					8.4116	-7.38528e-13	-0.738528
				1.5892	1.52049e-12					-8.40856	-4.75075e-13	-0.475075					8.40928	-1.07589e-12	-1.07589
				1.59152	7.84967e-13					-8.40624	2.00925e-12	2.00925					8.40696	-1.15934e-12	-1.15934
				1.59384	-3.2964e-13					-8.40392	-4.01165e-13	-0.401165					8.40464	-3.38021e-12	-3.38021
				1.59616	1.74103e-12					-8.4016	3.05471e-12	3.05471					8.40232	-1.91357e-13	-0.191357
				1.59848	2.85682e-12					-8.39928	1.11041e-12	1.11041					8.4	-3.83284e-13	-0.383284
				1.6008	1.33452e-12					-8.39696	1.65281e-12	1.65281					8.39768	-1.27616e-12	-1.27616
				1.60312	8.57685e-13					-8.39464	1.83878e-12	1.83878					8.39536	-1.42398e-12	-1.42398
				1.60544	9.24442e-13					-8.39232	5.51317e-13	0.551317					8.39304	-5.94284e-13	-0.594284
				1.60776	1.09849e-12					-8.39	2.16064e-12	2.16064					8.39072	-1.09103e-13	-0.109103
				1.61008	6.90792e-13					-8.38768	1.33452e-12	1.33452					8.3884	-2.35464e-13	-0.235464
				1.6124	-1.49272e-14					-8.38536	1.04282e-13	0.104282					8.38608	-1.40014e-12	-1.40014
				1.61472	1.18074e-12					-8.38304	1.55983e-12	1.55983					8.38376	-2.84376e-12	-2.84376
				1.61704	6.76487e-13					-8.38072	1.38101e-12	1.38101					8.38144	-1.23444e-12	-1.23444
				1.61936	2.90808e-12					-8.3784	1.57532e-12	1.57532					8.37912	-2.33116e-12	-2.33116
				1.62168	6.81255e-13					-8.37608	5.81119e-13	0.581119					8.3768	-1.27139e-12	-1.27139
				1.624	1.53122e-12					-8.37376	7.79007e-13	0.779007					8.37448	-1.96877e-12	-1.96877
				1.62632	2.06766e-12					-8.37144	-6.89652e-13	-0.689652					8.37216	-1.65286e-12	-1.65286
				1.62864	7.2417e-13					-8.36912	1.9556e-12	1.9556					8.36984	-7.20646e-13	-0.720646
				1.63096	3.78463e-13					-8.3668	9.19674e-13	0.919674					8.36752	-3.73747e-13	-0.373747
				1.63328	1.00312e-12					-8.36448	1.94845e-12	1.94845					8.3652	-2.40233e-13	-0.240233
				1.6356	1.06869e-12					-8.36216	3.13101e-12	3.13101					8.36288	-1.29643e-12	-1.29643
				1.63792	1.5193e-12					-8.35984	5.39396e-13	0.539396					8.36056	-2.84257e-12	-2.84257
				1.64024	5.44164e-13					-8.35752	2.97401e-13	0.297401					8.35824	-1.99738e-12	-1.99738
				1.64256	-2.09238e-13					-8.3552	2.4384e-12	2.4384					8.35592	4.24955e-13	0.424955
				1.64488	1.052e-12					-8.35288	1.65281e-12	1.65281					8.3536	-2.75996e-13	-0.275996
				1.6472	8.52086e-14					-8.35056	2.53019e-12	2.53019					8.35128	-2.35381e-12	-2.35381
				1.64952	2.80712e-13					-8.34824	-1.28689e-12	-1.28689					8.34896	-1.99857e-12	-1.99857
				1.65184	9.95968e-13					-8.34592	2.42171e-12	2.42171					8.34664	-1.64929e-12	-1.64929
				1.65416	1.19505e-12					-8.3436	5.14362e-13	0.514362					8.34432	-1.2857e-12	-1.2857
				1.65648	1.3381e-12					-8.34128	2.14991e-12	2.14991					8.342	-1.41087e-12	-1.41087
				1.6588	1.84831e-12					-8.33896	1.00193e-12	1.00193					8.33968	-2.90456e-12	-2.90456
				1.66112	2.49562e-12					-8.33664	1.89838e-12	1.89838					8.33736	-4.15626e-12	-4.15626
				1.66344	5.09594e-13					-8.33432	-6.26109e-14	-0.0626109					8.33504	-1.86744e-12	-1.86744
				1.66576	1.08895e-12					-8.332	-7.63562e-13	-0.763562					8.33272	4.71447e-13	0.471447
				1.66808	-6.76539e-13					-8.32968	3.50055e-12	3.50055					8.3304	-9.81714e-13	-0.981714
				1.6704	9.54244e-13					-8.32736	3.19776e-12	3.19776					8.32808	-1.83764e-12	-1.83764
				1.67272	1.67546e-12					-8.32504	2.26435e-12	2.26435					8.32576	-2.34547e-12	-2.34547
				1.67504	1.24988e-12					-8.32272	1.08657e-12	1.08657					8.32344	-8.36279e-13	-0.836279
				1.67736	-1.33696e-12					-8.3204	1.49582e-13	0.149582					8.32112	-3.01662e-12	-3.01662
				1.67968	-9.65025e-13					-8.31808	1.37661e-13	0.137661					8.3188	-3.24073e-12	-3.24073
				1.682	-1.37153e-12					-8.31576	6.443e-13	0.6443					8.31648	-2.71025e-12	-2.71025
				1.68432	8.91464e-15					-8.31344	-1.01271e-12	-1.01271					8.31416	-1.34888e-12	-1.34888
				1.68664	-9.00291e-14					-8.31112	1.63255e-12	1.63255					8.31184	-1.11523e-12	-1.11523
				1.68896	2.52102e-13					-8.3088	6.27611e-13	0.627611					8.30952	1.32141e-12	1.32141
				1.69128	2.52102e-13					-8.30648	1.50857e-12	1.50857					8.3072	-3.79708e-13	-0.379708
				1.6936	-6.84883e-13					-8.30416	1.87729e-13	0.187729					8.30488	-2.0701e-12	-2.0701
				1.69592	-4.72691e-13					-8.30184	6.51453e-13	0.651453					8.30256	-1.49074e-12	-1.49074
				1.69824	1.74579e-12					-8.29952	2.8151e-12	2.8151					8.30024	5.26283e-13	0.526283
				1.70056	-8.47008e-13					-8.2972	1.12352e-12	1.12352					8.29792	1.28124e-13	0.128124
				1.70288	-3.16527e-13					-8.29488	-3.6421e-13	-0.36421					8.2956	-1.46928e-12	-1.46928
				1.7052	5.10786e-13					-8.29256	1.29041e-12	1.29041					8.29328	-1.01032e-12	-1.01032
				1.70752	3.80848e-13					-8.29024	-4.70307e-13	-0.470307					8.29096	1.68655e-13	0.168655
				1.70984	1.54195e-12					-8.28792	1.02339e-12	1.02339					8.28864	-1.71604e-12	-1.71604
				1.71216	-5.88324e-13					-8.2856	1.78036e-12	1.78036					8.28632	-3.10566e-13	-0.310566
				1.71448	4.8456e-13					-8.28328	-2.60498e-13	-0.260498					8.284	7.37283e-13	0.737283
				1.7168	-3.5825e-13					-8.28096	1.81851e-12	1.81851					8.28168	7.38475e-13	0.738475
				1.71912	1.88921e-13					-8.27864	1.97825e-12	1.97825					8.27936	7.28939e-13	0.728939
				1.72144	7.4086e-13					-8.27632	4.26147e-13	0.426147					8.27704	1.28922e-12	1.28922
				1.72376	-1.82929e-12					-8.274	7.33707e-13	0.733707					8.27472	-2.14007e-13	-0.214007
				1.72608	-2.6169e-13					-8.27168	1.00193e-12	1.00193					8.2724	-2.0391e-12	-2.0391
				1.7284	1.35276e-13					-8.26936	1.71003e-12	1.71003					8.27008	-1.72796e-12	-1.72796
				1.73072	-6.09782e-13					-8.26704	1.3536e-12	1.3536					8.26776	-1.75777e-12	-1.75777
				1.73304	1.26419e-12					-8.26472	2.72367e-13	0.272367					8.26544	-3.99413e-12	-3.99413
				1.73536	1.08418e-12					-8.2624	8.99408e-13	0.899408					8.26312	-1.88532e-12	-1.88532
				1.73768	-1.5321e-13					-8.26008	8.86295e-13	0.886295					8.2608	3.37932e-13	0.337932
				1.74	5.54063e-14					-8.25776	1.13425e-12	1.13425					8.25848	-8.92308e-13	-0.892308
				1.74232	1.55506e-12					-8.25544	1.44813e-13	0.144813					8.25616	8.92255e-13	0.892255
				1.74464	2.24051e-12					-8.25312	6.90792e-13	0.690792					8.25384	-7.98132e-13	-0.798132
				1.74696	-8.67274e-13					-8.2508	1.96073e-13	0.196073					8.25152	-1.30358e-12	-1.30358
				1.74928	-9.26878e-13					-8.24848	3.92769e-13	0.392769					8.2492	1.07941e-12	1.07941
				1.7516	-1.3012e-12					-8.24616	1.55506e-12	1.55506					8.24688	1.93534e-12	1.93534
				1.75392	-1.32027e-12					-8.24384	4.14627e-15	0.00414627					8.24456	1.15011e-13	0.115011
				1.75624	1.28803e-12					-8.24152	1.15213e-12	1.15213					8.24224	-3.97589e-13	-0.397589
				1.75856	-6.87268e-13					-8.2392	-5.96669e-13	-0.596669					8.23992	-3.66595e-13	-0.366595
				1.76088	-1.47047e-12					-8.23688	-2.08877e-14	-0.0208877					8.2376	-8.27935e-13	-0.827935
				1.7632	-2.37408e-12					-8.23456	-3.84476e-13	-0.384476					8.23528	-2.44441e-12	-2.44441
				1.76552	-3.08182e-13					-8.23224	2.35495e-12	2.35495					8.23296	-5.6925e-13	-0.56925
				1.76784	-2.23818e-12					-8.22992	2.5687e-13	0.25687					8.23064	-1.39656e-12	-1.39656
				1.77016	1.43466e-12					-8.2276	7.83775e-13	0.783775					8.22832	-2.42653e-12	-2.42653
				1.77248	1.80778e-12					-8.22528	1.67546e-12	1.67546					8.226	5.04825e-13	0.504825
				1.7748	3.24664e-12					-8.22296	3.72503e-13	0.372503					8.22368	5.79927e-13	0.579927
				1.77712	2.18568e-12					-8.22064	3.68927e-13	0.368927					8.22136	-2.13089e-12	-2.13089
				1.77944	1.10922e-12					-8.21832	1.18789e-12	1.18789					8.21904	-2.55766e-12	-2.55766
				1.78176	-1.0195e-13					-8.216	1.0818e-12	1.0818					8.21672	-1.87817e-12	-1.87817
				1.78408	-1.15814e-12					-8.21368	-1.23444e-12	-1.23444					8.2144	-3.05798e-13	-0.305798
				1.7864	-4.28583e-13					-8.21136	-7.11109e-13	-0.711109					8.21208	-7.81081e-14	-0.0781081
				1.78872	1.01504e-12					-8.20904	1.685e-12	1.685					8.20976	-2.4158e-12	-2.4158
				1.79104	-7.06341e-13					-8.20672	2.14753e-12	2.14753					8.20744	3.23627e-13	0.323627
				1.79336	7.05097e-13					-8.2044	2.1964e-12	2.1964					8.20512	-1.4359e-12	-1.4359
				1.79568	9.69741e-13					-8.20208	1.37863e-12	1.37863					8.2028	-1.50504e-12	-1.50504
				1.798	1.84355e-12					-8.19976	2.11296e-12	2.11296					8.20048	8.27882e-13	0.827882
				1.80032	3.40876e-12					-8.19744	3.84149e-12	3.84149					8.19816	-1.56346e-12	-1.56346
				1.80264	-3.04244e-14					-8.19512	2.11296e-12	2.11296					8.19584	-2.80204e-12	-2.80204
				1.80496	6.4943e-14					-8.1928	1.05474e-13	0.105474					8.19352	-1.71008e-12	-1.71008
				1.80728	9.92391e-13					-8.19048	2.22025e-12	2.22025					8.1912	-1.84241e-12	-1.84241
				1.8096	2.35138e-12					-8.18816	1.80897e-12	1.80897					8.18888	-3.17755e-12	-3.17755
				1.81192	2.34065e-12					-8.18584	6.46684e-13	0.646684					8.18656	-3.72472e-12	-3.72472
				1.81424	2.90093e-12					-8.18352	1.11279e-12	1.11279					8.18424	-9.29262e-13	-0.929262
				1.81656	1.92222e-12					-8.1812	5.11978e-13	0.511978					8.18192	-8.16014e-13	-0.816014
				1.81888	1.07107e-12					-8.17888	3.9154e-12	3.9154					8.1796	-4.70307e-13	-0.470307
				1.8212	1.56579e-12					-8.17656	1.47877e-12	1.47877					8.17728	-2.1595e-12	-2.1595
				1.82352	9.72126e-13					-8.17424	3.63884e-12	3.63884					8.17496	-1.29643e-12	-1.29643
				1.82584	1.16763e-12					-8.17192	1.91626e-12	1.91626					8.17264	-2.64349e-12	-2.64349
				1.82816	1.37982e-12					-8.1696	2.60887e-12	2.60887					8.17032	-1.57538e-12	-1.57538
				1.83048	3.11789e-12					-8.16728	1.43943e-12	1.43943					8.168	-3.43945e-13	-0.343945
				1.8328	1.46804e-12					-8.16496	5.60854e-13	0.560854					8.16568	-3.15335e-13	-0.315335
				1.83512	7.79007e-13					-8.16264	2.00842e-13	0.200842					8.16336	6.56221e-13	0.656221
				1.83744	-8.26742e-13					-8.16032	2.6351e-12	2.6351					8.16104	-1.36557e-12	-1.36557
				1.83976	9.11329e-13					-8.158	-3.91629e-13	-0.391629					8.15872	-2.24736e-13	-0.224736
				1.84208	3.18584e-12					-8.15568	7.81391e-13	0.781391					8.1564	-6.26471e-13	-0.626471
				1.8444	2.87351e-12					-8.15336	5.22707e-13	0.522707					8.15408	-1.49074e-12	-1.49074
				1.84672	1.83997e-12					-8.15104	1.59917e-12	1.59917					8.15176	-3.53482e-13	-0.353482
				1.84904	2.07124e-12					-8.14872	3.71311e-13	0.371311					8.14944	1.48751e-14	0.0148751
				1.85136	1.03531e-12					-8.1464	9.81662e-13	0.981662					8.14712	-1.11404e-12	-1.11404
				1.85368	1.60274e-12					-8.14408	1.78871e-12	1.78871					8.1448	-9.32839e-13	-0.932839
				1.856	-2.5573e-13					-8.14176	5.34628e-13	0.534628					8.14248	-2.94628e-12	-2.94628
				1.85832	2.07839e-12					-8.13944	5.89825e-14	0.0589825					8.14016	-2.86522e-12	-2.86522
				1.86064	1.0055e-12					-8.13712	6.71718e-13	0.671718					8.13784	-4.69866e-12	-4.69866
				1.86296	1.29399e-12					-8.1348	2.22859e-12	2.22859					8.13552	-1.34888e-12	-1.34888
				1.86528	1.77917e-12					-8.13248	8.4934e-13	0.84934					8.1332	1.35956e-12	1.35956
				1.8676	5.7039e-13					-8.13016	1.72593e-14	0.0172593					8.13088	-6.22895e-13	-0.622895
				1.86992	7.17018e-13					-8.12784	-2.83148e-13	-0.283148					8.12856	-1.85433e-12	-1.85433
				1.87224	9.9716e-13					-8.12552	-1.35329e-13	-0.135329					8.12624	-2.23543e-13	-0.223543
				1.87456	1.24988e-12					-8.1232	3.1775e-12	3.1775					8.12392	-7.69522e-13	-0.769522
				1.87688	7.96888e-13					-8.12088	2.20117e-12	2.20117					8.1216	-1.18437e-12	-1.18437
				1.8792	3.18823e-12					-8.11856	3.67698e-12	3.67698					8.11928	-2.78297e-12	-2.78297
				1.88152	2.90249e-13					-8.11624	1.68142e-12	1.68142					8.11696	-1.59207e-12	-1.59207
				1.88384	8.56493e-13					-8.11392	7.88543e-13	0.788543					8.11464	-2.4611e-12	-2.4611
				1.88616	2.92716e-12					-8.1116	2.30644e-13	0.230644					8.11232	-3.65319e-12	-3.65319
				1.88848	5.10786e-13					-8.10928	1.04365e-12	1.04365					8.11	-1.90678e-12	-1.90678
				1.8908	8.97024e-13					-8.10696	-7.21477e-14	-0.0721477					8.10768	-6.82499e-13	-0.682499
				1.89312	1.35479e-12					-8.10464	-6.92036e-13	-0.692036					8.10536	6.57413e-13	0.657413
				1.89544	1.12233e-12					-8.10232	2.29452e-13	0.229452					8.10304	-1.1045e-12	-1.1045
				1.89776	-7.24222e-13					-8.1	2.26793e-12	2.26793					8.10072	-1.14861e-12	-1.14861
				1.90008	1.79109e-12					-8.09768	4.59526e-13	0.459526					8.0984	-1.99023e-12	-1.99023
				1.9024	3.22041e-12					-8.09536	2.32396e-12	2.32396					8.09608	-4.70307e-13	-0.470307
				1.90472	1.85189e-12					-8.09304	1.04723e-12	1.04723					8.09376	-1.94612e-12	-1.94612
				1.90704	1.32856e-12					-8.09072	1.07345e-12	1.07345					8.09144	-1.66836e-12	-1.66836
				1.90936	1.73864e-12					-8.0884	2.67324e-12	2.67324					8.08912	-7.19454e-13	-0.719454
				1.91168	1.35002e-12					-8.08608	5.76351e-13	0.576351					8.0868	2.18723e-13	0.218723
				1.914	7.44436e-13					-8.08376	3.01656e-12	3.01656					8.08448	-1.60041e-12	-1.60041
				1.91632	-5.31103e-13					-8.08144	1.88527e-12	1.88527					8.08216	-2.16546e-12	-2.16546
				1.91864	-2.28229e-12					-8.07912	-3.67787e-13	-0.367787					8.07984	-1.64929e-12	-1.64929
				1.92096	1.46565e-12					-8.0768	-9.31647e-13	-0.931647					8.07752	-3.41716e-12	-3.41716
				1.92328	1.7446e-12					-8.07448	1.93689e-13	0.193689					8.0752	-2.76509e-12	-2.76509
				1.9256	5.04825e-13					-8.07216	-6.87268e-13	-0.687268					8.07288	-3.49465e-12	-3.49465
				1.92792	-5.3468e-13					-8.06984	-3.04606e-13	-0.304606					8.07056	-3.14894e-12	-3.14894
				1.93024	6.59797e-13					-8.06752	9.69741e-13	0.969741					8.06824	-2.68045e-12	-2.68045
				1.93256	-5.39048e-15					-8.0652	2.30727e-12	2.30727					8.06592	-1.01867e-12	-1.01867
				1.93488	2.00925e-12					-8.06288	1.38459e-12	1.38459					8.0636	-1.55273e-12	-1.55273
				1.9372	9.06561e-13					-8.06056	9.79278e-13	0.979278					8.06128	1.28124e-13	0.128124
				1.93952	-6.07397e-13					-8.05824	-2.25487e-12	-2.25487					8.05896	4.09458e-13	0.409458
				1.94184	-1.90165e-13					-8.05592	-1.44865e-13	-0.144865					8.05664	-1.54915e-12	-1.54915
				1.94416	4.51181e-13					-8.0536	1.83282e-12	1.83282					8.05432	-1.91155e-12	-1.91155
				1.94648	2.13955e-13					-8.05128	1.04127e-12	1.04127					8.052	-2.64707e-12	-2.64707
				1.9488	1.41082e-12					-8.04896	-1.71962e-12	-1.71962					8.04968	-2.2358e-12	-2.2358
				1.95112	2.95017e-13					-8.04664	1.10087e-12	1.10087					8.04736	-4.28583e-13	-0.428583
				1.95344	-1.62747e-13					-8.04432	9.02984e-13	0.902984					8.04504	-1.27497e-12	-1.27497
				1.95576	-1.37351e-14					-8.042	1.1116e-12	1.1116					8.04272	-1.68707e-13	-0.168707
				1.95808	6.03769e-13					-8.03968	2.78053e-12	2.78053					8.0404	-1.70412e-12	-1.70412
				1.9604	1.00074e-12					-8.03736	7.36091e-13	0.736091					8.03808	1.00193e-12	1.00193
				1.96272	4.79791e-13					-8.03504	5.57277e-13	0.557277					8.03576	5.8708e-13	0.58708
				1.96504	1.51095e-12					-8.03272	1.40128e-12	1.40128					8.03344	-4.33352e-13	-0.433352
				1.96736	6.51453e-13					-8.0304	1.35121e-12	1.35121					8.03112	-1.76254e-12	-1.76254
				1.96968	9.59374e-14					-8.02808	6.49069e-13	0.649069					8.0288	-1.03536e-12	-1.03536
				1.972	1.14736e-12					-8.02576	-2.8434e-13	-0.28434					8.02648	-1.39895e-12	-1.39895
				1.97432	1.38817e-12					-8.02344	1.46327e-12	1.46327					8.02416	-1.38822e-12	-1.38822
				1.97664	1.29757e-12					-8.02112	1.91626e-12	1.91626					8.02184	3.97537e-13	0.397537
				1.97896	-8.02901e-13					-8.0188	8.13577e-13	0.813577					8.01952	-1.2547e-12	-1.2547
				1.98128	2.71377e-12					-8.01648	-9.87675e-13	-0.987675					8.0172	-1.27139e-12	-1.27139
				1.9836	2.45509e-12					-8.01416	2.11653e-12	2.11653					8.01488	4.11842e-13	0.411842
				1.98592	4.18124e-12					-8.01184	1.60632e-12	1.60632					8.01256	-4.46465e-13	-0.446465
				1.98824	1.95083e-12					-8.00952	4.13034e-13	0.413034					8.01024	-1.00317e-12	-1.00317
				1.99056	-4.50041e-13					-8.0072	6.09729e-13	0.609729					8.00792	-1.37034e-12	-1.37034
				1.99288	8.82719e-13					-8.00488	2.54569e-12	2.54569					8.0056	-2.01168e-12	-2.01168
				1.9952	4.1065e-13					-8.00256	4.8512e-12	4.8512					8.00328	-2.87237e-12	-2.87237
				1.99752	1.78275e-12					-8.00024	4.57225e-12	4.57225					8.00096	-1.46332e-12	-1.46332
				1.99984	-1.24874e-12					-7.99792	2.09746e-12	2.09746					7.99864	-8.51776e-13	-0.851776
				2.00216	3.17667e-13					-7.9956	3.36942e-12	3.36942					7.99632	-9.24133e-14	-0.0924133
				2.00448	1.74616e-13					-7.99328	4.07872e-12	4.07872					7.994	-3.03414e-13	-0.303414
				2.0068	2.66013e-12					-7.99096	3.15962e-12	3.15962					7.99168	-1.90165e-13	-0.190165
				2.00912	2.07362e-12					-7.98864	2.07481e-12	2.07481					7.98936	-1.06755e-12	-1.06755
				2.01144	6.75295e-13					-7.98632	-3.43945e-13	-0.343945					7.98704	-1.17483e-12	-1.17483
				2.01376	2.16183e-12					-7.984	1.55625e-12	1.55625					7.98472	-6.49951e-14	-0.0649951
				2.01608	2.95219e-12					-7.98168	4.14226e-13	0.414226					7.9824	-2.32163e-12	-2.32163
				2.0184	1.7303e-12					-7.97936	2.78328e-13	0.278328					7.98008	-4.6077e-13	-0.46077
				2.02072	8.40995e-13					-7.97704	4.3926e-13	0.43926					7.97776	-1.06635e-12	-1.06635
				2.02304	4.18995e-13					-7.97472	1.25942e-12	1.25942					7.97544	-1.50826e-13	-0.150826
				2.02536	3.71311e-13					-7.9724	9.10137e-13	0.910137					7.97312	1.42429e-13	0.142429
				2.02768	2.62317e-12					-7.97008	-8.4224e-13	-0.84224					7.9708	-1.37351e-14	-0.0137351
				2.03	3.95951e-12					-7.96776	-1.33815e-12	-1.33815					7.96848	3.90384e-13	0.390384
				2.03232	1.25227e-12					-7.96544	1.18909e-12	1.18909					7.96616	-2.27037e-12	-2.27037
				2.03464	1.51572e-12					-7.96312	1.2574e-13	0.12574					7.96384	-1.51935e-12	-1.51935
				2.03696	3.46479e-12					-7.9608	-1.23205e-12	-1.23205					7.96152	-2.07367e-12	-2.07367
				2.03928	1.62778e-12					-7.95848	9.78086e-13	0.978086					7.9592	-1.22013e-12	-1.22013
				2.0416	1.76844e-12					-7.95616	4.89328e-13	0.489328					7.95688	-4.36928e-13	-0.436928
				2.04392	2.47178e-12					-7.95384	1.99375e-12	1.99375					7.95456	-1.04609e-12	-1.04609
				2.04624	9.88815e-13					-7.95152	2.12965e-12	2.12965					7.95224	-1.34769e-12	-1.34769
				2.04856	1.10802e-12					-7.9492	-1.17447e-13	-0.117447					7.94992	-1.75896e-12	-1.75896
				2.05088	1.04246e-12					-7.94688	-1.0449e-12	-1.0449					7.9476	-1.84204e-13	-0.184204
				2.0532	4.04892e-12					-7.94456	2.42565e-13	0.242565					7.94528	1.61503e-13	0.161503
				2.05552	2.73046e-12					-7.94224	1.57175e-12	1.57175					7.94296	-2.42415e-12	-2.42415
				2.05784	1.16644e-12					-7.93992	7.9212e-13	0.79212					7.94064	-1.09019e-12	-1.09019
				2.06016	1.11875e-12					-7.9376	6.99136e-13	0.699136					7.93832	-1.50147e-12	-1.50147
				2.06248	2.23098e-12					-7.93528	1.55387e-12	1.55387					7.936	-3.809e-13	-0.3809
				2.0648	1.21412e-12					-7.93296	5.94232e-13	0.594232					7.93368	-1.33338e-12	-1.33338
				2.06712	1.54671e-12					-7.93064	1.60155e-12	1.60155					7.93136	-2.49686e-12	-2.49686
				2.06944	7.00329e-13					-7.92832	-2.11623e-13	-0.211623					7.92904	-2.40746e-12	-2.40746
				2.07176	-3.18911e-13					-7.926	-8.61313e-13	-0.861313					7.92672	-9.11381e-13	-0.911381
				2.07408	-1.7586e-13					-7.92368	2.15587e-12	2.15587					7.9244	-8.7681e-13	-0.87681
				2.0764	1.84355e-12					-7.92136	4.75023e-13	0.475023					7.92208	1.86536e-13	0.186536
				2.07872	1.84831e-12					-7.91904	6.31187e-13	0.631187					7.91976	-5.45409e-13	-0.545409
				2.08104	1.9556e-12					-7.91672	2.83096e-13	0.283096					7.91744	-1.17483e-12	-1.17483
				2.08336	4.8456e-13					-7.9144	3.98729e-13	0.398729					7.91512	1.14856e-12	1.14856
				2.08568	6.86023e-13					-7.91208	1.22247e-12	1.22247					7.9128	4.66678e-13	0.466678
				2.088	4.07074e-13					-7.90976	1.2928e-12	1.2928					7.91048	-2.14401e-12	-2.14401
				2.09032	9.60205e-13					-7.90744	-1.04334e-13	-0.104334					7.90816	-1.22252e-12	-1.22252
				2.09264	9.98352e-13					-7.90512	-5.39048e-15	-0.00539048					7.90584	-2.0689e-12	-2.0689
				2.09496	1.86023e-12					-7.9028	4.70616e-14	0.0470616					7.90352	-1.69816e-12	-1.69816
				2.09728	2.0307e-12					-7.90048	-1.17841e-12	-1.17841					7.9012	-2.8434e-13	-0.28434
				2.0996	2.38595e-12					-7.89816	-7.88595e-13	-0.788595					7.89888	3.09322e-13	0.309322
				2.10192	2.09269e-12					-7.89584	1.81768e-13	0.181768					7.89656	-4.59578e-13	-0.459578
				2.10424	1.82328e-12					-7.89352	1.86023e-12	1.86023					7.89424	-3.28448e-13	-0.328448
				2.10656	3.4481e-12					-7.8912	1.40009e-12	1.40009					7.89192	-2.17142e-12	-2.17142
				2.10888	3.35548e-13					-7.88888	9.05368e-13	0.905368					7.8896	-9.07805e-13	-0.907805
				2.1112	2.38356e-12					-7.88656	-7.6916e-14	-0.076916					7.88728	-7.18262e-13	-0.718262
				2.11352	1.46446e-12					-7.88424	1.33214e-12	1.33214					7.88496	-1.04609e-12	-1.04609
				2.11584	2.86994e-12					-7.88192	-7.62369e-13	-0.762369					7.88264	2.95417e-15	0.00295417
				2.11816	1.3083e-12					-7.8796	-6.67002e-13	-0.667002					7.88032	-3.34408e-13	-0.334408
				2.12048	1.01027e-12					-7.87728	4.60718e-13	0.460718					7.878	-1.78995e-12	-1.78995
				2.1228	1.15094e-12					-7.87496	2.96054e-12	2.96054					7.87568	-1.36914e-12	-1.36914
				2.12512	1.50022e-12					-7.87264	1.84474e-12	1.84474					7.87336	-2.17619e-12	-2.17619
				2.12744	9.79278e-13					-7.87032	1.80063e-12	1.80063					7.87104	-1.98903e-12	-1.98903
				2.12976	1.38101e-12					-7.868	6.01385e-13	0.601385					7.86872	-2.0236e-12	-2.0236
				2.13208	5.06017e-13					-7.86568	-2.18692e-12	-2.18692					7.8664	-1.94612e-12	-1.94612
				2.1344	9.44708e-13					-7.86336	1.05915e-12	1.05915					7.86408	-1.37749e-12	-1.37749
				2.13672	1.59559e-12					-7.86104	7.84967e-13	0.784967					7.86176	-6.90844e-13	-0.690844
				2.13904	1.3683e-14					-7.85872	1.04127e-12	1.04127					7.85944	-2.00334e-12	-2.00334
				2.14136	1.77321e-12					-7.8564	1.17001e-12	1.17001					7.85712	-1.18556e-12	-1.18556
				2.14368	2.85682e-12					-7.85408	1.30508e-13	0.130508					7.8548	-2.10109e-12	-2.10109
				2.146	2.11773e-12					-7.85176	-7.86211e-13	-0.786211					7.85248	-5.14414e-13	-0.514414
				2.14832	2.18806e-12					-7.84944	2.69351e-12	2.69351					7.85016	-1.96161e-12	-1.96161
				2.15064	6.39532e-13					-7.84712	2.3931e-12	2.3931					7.84784	-2.48256e-12	-2.48256
				2.15296	2.20117e-12					-7.8448	-9.56681e-13	-0.956681					7.84552	-9.86483e-13	-0.986483
				2.15528	1.06392e-12					-7.84248	-1.26186e-12	-1.26186					7.8432	-5.8594e-13	-0.58594
				2.1576	1.25942e-12					-7.84016	4.09458e-13	0.409458					7.84088	-1.36521e-13	-0.136521
				2.15992	4.11842e-13					-7.83784	1.35276e-13	0.135276					7.83856	-1.40097e-13	-0.140097
				2.16224	-5.15606e-13					-7.83552	2.91404e-12	2.91404					7.83624	-1.05801e-12	-1.05801
				2.16456	-6.6581e-13					-7.8332	3.10001e-12	3.10001					7.83392	1.86262e-12	1.86262
				2.16688	6.65758e-13					-7.83088	1.75771e-12	1.75771					7.8316	8.69606e-13	0.869606
				2.1692	6.1569e-13					-7.82856	-4.29776e-13	-0.429776					7.82928	-1.2547e-12	-1.2547
				2.17152	1.25465e-12					-7.82624	5.62046e-13	0.562046					7.82696	-3.5316e-12	-3.5316
				2.17384	4.48797e-13					-7.82392	2.27031e-12	2.27031					7.82464	-1.82929e-12	-1.82929
				2.17616	9.66165e-13					-7.8216	2.54926e-12	2.54926					7.82232	-1.15099e-12	-1.15099
				2.17848	2.78649e-12					-7.81928	-1.37868e-12	-1.37868					7.82	-8.32703e-13	-0.832703
				2.1808	1.16524e-12					-7.81696	-2.59342e-12	-2.59342					7.81768	-2.68164e-12	-2.68164
				2.18312	1.65162e-12					-7.81464	9.42323e-13	0.942323					7.81536	-1.98426e-12	-1.98426
				2.18544	1.01743e-12					-7.81232	-8.55353e-13	-0.855353					7.81304	-2.84734e-12	-2.84734
				2.18776	2.05216e-12					-7.81	1.14856e-12	1.14856					7.81072	-2.5827e-12	-2.5827
				2.19008	2.31919e-12					-7.80768	1.60513e-12	1.60513					7.8084	-2.08678e-12	-2.08678
				2.1924	1.47757e-12					-7.80536	3.24783e-12	3.24783					7.80608	-1.75657e-12	-1.75657
				2.19472	1.36552e-12					-7.80304	2.09985e-12	2.09985					7.80376	-3.11556e-12	-3.11556
				2.19704	6.53837e-13					-7.80072	1.53003e-12	1.53003					7.80144	-9.86483e-13	-0.986483
				2.19936	1.07703e-12					-7.7984	1.00431e-12	1.00431					7.79912	-1.3906e-12	-1.3906
				2.20168	2.50909e-13					-7.79608	2.80712e-13	0.280712					7.7968	-2.14877e-12	-2.14877
				2.204	1.89719e-12					-7.79376	1.5336e-12	1.5336					7.79448	-1.66359e-12	-1.66359
				2.20632	1.68023e-12					-7.79144	2.00448e-12	2.00448					7.79216	-1.17447e-13	-0.117447
				2.20864	-6.49951e-14					-7.78912	1.35276e-13	0.135276					7.78984	-5.08454e-13	-0.508454
				2.21096	1.02935e-12					-7.7868	1.95322e-12	1.95322					7.78752	-2.02718e-12	-2.02718
				2.21328	1.12829e-12					-7.78448	3.44095e-12	3.44095					7.7852	-1.11642e-12	-1.11642
				2.2156	2.08196e-12					-7.78216	-4.10702e-13	-0.410702					7.78288	-3.51928e-14	-0.0351928
				2.21792	-1.94933e-13					-7.77984	1.53837e-12	1.53837					7.78056	-1.41325e-12	-1.41325
				2.22024	3.66542e-13					-7.77752	1.1867e-12	1.1867					7.77824	-2.46825e-12	-2.46825
				2.22256	1.4585e-12					-7.7752	2.20594e-12	2.20594					7.77592	-2.3407e-12	-2.3407
				2.22488	2.77338e-12					-7.77288	2.85325e-12	2.85325					7.7736	-1.65525e-12	-1.65525
				2.2272	2.9665e-12					-7.77056	7.64702e-13	0.764702					7.77128	9.05368e-13	0.905368
				2.22952	2.23336e-12					-7.76824	2.56357e-12	2.56357					7.76896	7.51589e-13	0.751589
				2.23184	2.18687e-12					-7.76592	2.1368e-12	2.1368					7.76664	-2.23818e-12	-2.23818
				2.23416	1.27849e-12					-7.7636	1.44777e-12	1.44777					7.76432	-1.25828e-12	-1.25828
				2.23648	1.18432e-12					-7.76128	5.26283e-13	0.526283					7.762	-1.28689e-12	-1.28689
				2.2388	6.50261e-13					-7.75896	2.75788e-12	2.75788					7.75968	-1.99142e-12	-1.99142
				2.24112	-8.40686e-14					-7.75664	1.08776e-12	1.08776					7.75736	-2.1297e-12	-2.1297
				2.24344	2.9808e-12					-7.75432	2.9212e-12	2.9212					7.75504	1.81768e-13	0.181768
				2.24576	1.27849e-12					-7.752	2.94146e-12	2.94146					7.75272	-9.71816e-14	-0.0971816
				2.24808	-5.26335e-13					-7.74968	2.20237e-12	2.20237					7.7504	-6.24087e-13	-0.624087
				2.2504	2.50516e-12					-7.74736	1.33095e-12	1.33095					7.74808	-4.26199e-13	-0.426199
				2.25272	2.29296e-12					-7.74504	1.01981e-12	1.01981					7.74576	-7.15878e-13	-0.715878
				2.25504	2.32515e-12					-7.74272	3.74887e-13	0.374887					7.74344	-2.58508e-12	-2.58508
				2.25736	1.52645e-12					-7.7404	8.85103e-13	0.885103					7.74112	-4.28381e-12	-4.28381
				2.25968	1.14379e-12					-7.73808	9.12521e-13	0.912521					7.7388	-1.22133e-12	-1.22133
				2.262	2.52102e-13					-7.73576	7.80199e-13	0.780199					7.73648	-1.22967e-12	-1.22967
				2.26432	1.90077e-12					-7.73344	2.21905e-12	2.21905					7.73416	-3.21212e-12	-3.21212
				2.26664	2.30489e-12					-7.73112	8.69606e-13	0.869606					7.73184	-6.03821e-13	-0.603821
				2.26896	2.20713e-12					-7.7288	1.71361e-12	1.71361					7.72952	-7.62369e-13	-0.762369
				2.27128	2.26793e-12					-7.72648	1.89123e-12	1.89123					7.7272	-2.21911e-12	-2.21911
				2.2736	3.12981e-12					-7.72416	1.56698e-12	1.56698					7.72488	-3.84393e-12	-3.84393
				2.27592	2.32515e-12					-7.72184	2.99868e-12	2.99868					7.72256	3.89192e-13	0.389192
				2.27824	6.69334e-13					-7.71952	3.83672e-12	3.83672					7.72024	2.04262e-12	2.04262
				2.28056	1.01504e-12					-7.7172	1.05474e-13	0.105474					7.71792	-1.55153e-12	-1.55153
				2.28288	2.09508e-12					-7.71488	2.0462e-12	2.0462					7.7156	-2.04864e-12	-2.04864
				2.2852	7.11057e-13					-7.71256	2.29058e-12	2.29058					7.71328	-1.12834e-12	-1.12834
				2.28752	2.40144e-12					-7.71024	2.22621e-12	2.22621					7.71096	-2.27514e-12	-2.27514
				2.28984	2.46141e-13					-7.70792	1.73387e-12	1.73387					7.70864	-3.07622e-12	-3.07622
				2.29216	1.62182e-12					-7.7056	2.03666e-12	2.03666					7.70632	-1.82214e-12	-1.82214
				2.29448	1.02696e-12					-7.70328	1.14617e-12	1.14617					7.704	-1.11881e-12	-1.11881
				2.2968	9.86431e-13					-7.70096	2.71377e-12	2.71377					7.70168	-8.80387e-13	-0.880387
				2.29912	1.13663e-12					-7.69864	-1.41325e-12	-1.41325					7.69936	-1.8142e-15	-0.0018142
				2.30144	-3.71363e-13					-7.69632	2.11892e-12	2.11892					7.69704	-1.45617e-12	-1.45617
				2.30376	9.9716e-13					-7.694	2.2274e-12	2.2274					7.69472	-1.37868e-12	-1.37868
				2.30608	1.96156e-12					-7.69168	2.41813e-12	2.41813					7.6924	-2.20242e-12	-2.20242
				2.3084	1.96633e-12					-7.68936	2.97246e-12	2.97246					7.69008	4.94096e-13	0.494096
				2.31072	1.63851e-12					-7.68704	1.99613e-12	1.99613					7.68776	7.94504e-13	0.794504
				2.31304	1.64804e-12					-7.68472	1.56579e-12	1.56579					7.68544	-1.59803e-12	-1.59803
				2.31536	1.84355e-12					-7.6824	1.72076e-12	1.72076					7.68312	-4.30765e-12	-4.30765
				2.31768	3.3078e-13					-7.68008	1.77917e-12	1.77917					7.6808	-1.70889e-12	-1.70889
				2.32	1.12352e-12					-7.67776	1.16048e-12	1.16048					7.67848	-4.6673e-13	-0.46673
				2.32232	2.6947e-12					-7.67544	1.81732e-12	1.81732					7.67616	-1.87698e-12	-1.87698
				2.32464	1.32379e-12					-7.67312	1.78275e-12	1.78275					7.67384	-2.29659e-12	-2.29659
				2.32696	8.00464e-13					-7.6708	-1.72439e-12	-1.72439					7.67152	-2.39315e-12	-2.39315
				2.32928	6.12114e-13					-7.66848	3.8204e-13	0.38204					7.6692	-2.32997e-12	-2.32997
				2.3316	5.94232e-13					-7.66616	8.57685e-13	0.857685					7.66688	-3.20139e-12	-3.20139
				2.33392	1.34084e-13					-7.66384	1.12114e-12	1.12114					7.66456	-3.07265e-12	-3.07265
				2.33624	1.5646e-12					-7.66152	6.27611e-13	0.627611					7.66224	-2.8235e-12	-2.8235
				2.33856	7.64702e-13					-7.6592	1.23915e-12	1.23915					7.65992	-3.55783e-12	-3.55783
				2.34088	3.5939e-13					-7.65688	1.3524e-12	1.3524					7.6576	-9.04229e-13	-0.904229
				2.3432	2.06051e-12					-7.65456	1.58009e-12	1.58009					7.65528	-1.05443e-12	-1.05443
				2.34552	1.48353e-12					-7.65224	7.02713e-13	0.702713					7.65296	-2.95463e-12	-2.95463
				2.34784	2.8604e-12					-7.64992	1.46684e-12	1.46684					7.65064	-2.02599e-12	-2.02599
				2.35016	2.47893e-12					-7.6476	1.59559e-12	1.59559					7.64832	-8.62505e-13	-0.862505
				2.35248	1.685e-12					-7.64528	1.33452e-12	1.33452					7.646	-9.34031e-13	-0.934031
				2.3548	3.00107e-12					-7.64296	2.74834e-12	2.74834					7.64368	-2.74803e-13	-0.274803
				2.35712	2.19402e-12					-7.64064	2.81749e-12	2.81749					7.64136	-3.11758e-13	-0.311758
				2.35944	1.27373e-12					-7.63832	4.70255e-13	0.470255					7.63904	-1.5563e-12	-1.5563
				2.36176	2.32634e-12					-7.636	5.51317e-13	0.551317					7.63672	-7.4568e-13	-0.74568
				2.36408	1.38853e-13					-7.63368	2.71497e-12	2.71497					7.6344	5.58469e-13	0.558469
				2.3664	1.72672e-12					-7.63136	1.61228e-12	1.61228					7.63208	-2.93913e-12	-2.93913
				2.36872	2.65417e-12					-7.62904	1.76964e-12	1.76964					7.62976	-1.55153e-12	-1.55153
				2.37104	-3.65403e-13					-7.62672	3.15644e-14	0.0315644					7.62744	-4.8342e-13	-0.48342
				2.37336	-1.37351e-14					-7.6244	2.70066e-12	2.70066					7.62512	-6.85714e-14	-0.0685714
				2.37568	1.45969e-12					-7.62208	3.85461e-12	3.85461					7.6228	-1.48442e-13	-0.148442
				2.378	2.30369e-12					-7.61976	2.08792e-12	2.08792					7.62048	3.86808e-13	0.386808
				2.38032	2.05812e-12					-7.61744	1.56698e-12	1.56698					7.61816	-1.40491e-12	-1.40491
				2.38264	-6.84883e-13					-7.61512	1.65281e-12	1.65281					7.61584	-2.07963e-12	-2.07963
				2.38496	7.25362e-13					-7.6128	-8.33895e-13	-0.833895					7.61352	-1.11881e-12	-1.11881
				2.38728	1.37148e-12					-7.61048	1.8209e-12	1.8209					7.6112	-1.9187e-12	-1.9187
				2.3896	1.45969e-12					-7.60816	5.28667e-13	0.528667					7.60888	-2.05221e-12	-2.05221
				2.39192	8.29075e-13					-7.60584	9.42323e-13	0.942323					7.60656	-1.77684e-12	-1.77684
				2.39424	-5.03685e-13					-7.60352	5.90656e-13	0.590656					7.60424	-3.1394e-12	-3.1394
				2.39656	-6.50313e-13					-7.6012	6.75295e-13	0.675295					7.60192	-1.23408e-13	-0.123408
				2.39888	1.71361e-12					-7.59888	2.31836e-13	0.231836					7.5996	-7.95748e-13	-0.795748
				2.4012	1.62062e-12					-7.59656	5.53701e-13	0.553701					7.59728	-5.28719e-13	-0.528719
				2.40352	-5.82363e-13					-7.59424	4.98865e-13	0.498865					7.59496	3.31972e-13	0.331972
				2.40584	7.08673e-13					-7.59192	1.51095e-12	1.51095					7.59264	4.34853e-14	0.0434853
				2.40816	1.03888e-12					-7.5896	2.5135e-12	2.5135					7.59032	-4.30968e-13	-0.430968
				2.41048	1.46804e-12					-7.58728	1.70049e-12	1.70049					7.588	-7.77867e-13	-0.777867
				2.4128	1.67904e-12					-7.58496	-5.3468e-13	-0.53468					7.58568	-1.55988e-12	-1.55988
				2.41512	1.9413e-12					-7.58264	1.57175e-12	1.57175					7.58336	-2.87476e-12	-2.87476
				2.41744	-5.25143e-13					-7.58032	1.07858e-13	0.107858					7.58104	-9.97212e-13	-0.997212
				2.41976	-1.65048e-12					-7.578	-7.14686e-13	-0.714686					7.57872	-1.10569e-12	-1.10569
				2.42208	-7.87403e-13					-7.57568	9.17289e-13	0.917289					7.5764	-8.05285e-13	-0.805285
				2.4244	-1.84204e-13					-7.57336	1.68261e-12	1.68261					7.57408	-8.31511e-13	-0.831511
				2.42672	1.55506e-12					-7.57104	2.52661e-12	2.52661					7.57176	-1.92108e-12	-1.92108
				2.42904	1.36432e-12					-7.56872	1.1414e-12	1.1414					7.56944	-5.60906e-13	-0.560906
				2.43136	1.54195e-12					-7.5664	5.44164e-13	0.544164					7.56712	-8.69658e-13	-0.869658
				2.43368	6.97114e-14					-7.56408	1.28565e-12	1.28565					7.5648	9.24442e-13	0.924442
				2.436	-6.62234e-13					-7.56176	1.07345e-12	1.07345					7.56248	-1.26901e-12	-1.26901
				2.43832	-1.2559e-12					-7.55944	1.19982e-12	1.19982					7.56016	-5.81171e-13	-0.581171
				2.44064	8.57685e-13					-7.55712	2.99749e-12	2.99749					7.55784	-2.43607e-12	-2.43607
				2.44296	8.85103e-13					-7.5548	-8.87539e-13	-0.887539					7.55552	-5.18821e-14	-0.0518821
				2.44528	-4.28583e-13					-7.55248	3.06938e-13	0.306938					7.5532	1.01981e-12	1.01981
				2.4476	1.93689e-13					-7.55016	5.8708e-13	0.58708					7.55088	1.25584e-12	1.25584
				2.44992	2.64463e-12					-7.54784	2.48012e-12	2.48012					7.54856	-2.28586e-12	-2.28586
				2.45224	2.30846e-12					-7.54552	6.26419e-13	0.626419					7.54624	-7.1707e-13	-0.71707
				2.45456	2.73559e-13					-7.5432	1.43466e-12	1.43466					7.54392	-1.84717e-12	-1.84717
				2.45688	1.06034e-12					-7.54088	2.20356e-12	2.20356					7.5416	-2.07844e-12	-2.07844
				2.4592	2.68993e-12					-7.53856	2.74596e-12	2.74596					7.53928	-2.02956e-12	-2.02956
				2.46152	1.29995e-12					-7.53624	1.43347e-12	1.43347					7.53696	-1.98307e-12	-1.98307
				2.46384	1.83997e-12					-7.53392	-2.24736e-13	-0.224736					7.53464	-1.96161e-12	-1.96161
				2.46616	2.60768e-12					-7.5316	1.10206e-12	1.10206					7.53232	-3.05953e-12	-3.05953
				2.46848	1.15332e-12					-7.52928	1.15571e-12	1.15571					7.53	-1.38583e-12	-1.38583
				2.4708	4.86944e-13					-7.52696	2.55284e-12	2.55284					7.52768	-1.89843e-12	-1.89843
				2.47312	8.86295e-13					-7.52464	3.24819e-13	0.324819					7.52536	-2.53978e-12	-2.53978
				2.47544	-2.08877e-14					-7.52232	9.94775e-13	0.994775					7.52304	-5.82363e-13	-0.582363
				2.47776	6.82447e-13					-7.52	1.37744e-12	1.37744					7.52072	-4.92956e-13	-0.492956
				2.48008	-6.64618e-13					-7.51768	2.65178e-12	2.65178					7.5184	1.90113e-13	0.190113
				2.4824	-1.09496e-12					-7.51536	2.53973e-12	2.53973					7.51608	-1.26305e-12	-1.26305
				2.48472	3.42701e-13					-7.51304	3.09322e-13	0.309322					7.51376	-2.23341e-12	-2.23341
				2.48704	-5.4064e-13					-7.51072	6.83639e-13	0.683639					7.51144	-2.32759e-12	-2.32759
				2.48936	-1.14622e-12					-7.5084	2.04859e-12	2.04859					7.50912	-2.36812e-12	-2.36812
				2.49168	-3.49905e-13					-7.50608	3.11193e-12	3.11193					7.5068	-1.70531e-12	-1.70531
				2.494	1.5193e-12					-7.50376	1.91269e-12	1.91269					7.50448	-2.81038e-12	-2.81038
				2.49632	1.16644e-12					-7.50144	2.83179e-12	2.83179					7.50216	-1.37153e-12	-1.37153
				2.49864	-8.43432e-13					-7.49912	1.78513e-12	1.78513					7.49984	4.34492e-13	0.434492
				2.50096	7.9212e-13					-7.4968	8.87487e-13	0.887487					7.49752	-1.33219e-12	-1.33219
				2.50328	1.021e-12					-7.49448	2.83096e-13	0.283096					7.4952	-1.64213e-12	-1.64213
				2.5056	-2.29504e-13					-7.49216	2.06408e-12	2.06408					7.49288	-5.81171e-13	-0.581171
				2.50792	1.89361e-12					-7.48984	1.48115e-12	1.48115					7.49056	-1.92943e-12	-1.92943
				2.51024	3.58758e-12					-7.48752	1.41237e-13	0.141237					7.48824	-1.66598e-12	-1.66598
				2.51256	8.67221e-13					-7.4852	1.44813e-13	0.144813					7.48592	-1.59445e-12	-1.59445
				2.51488	1.59678e-12					-7.48288	1.67463e-13	0.167463					7.4836	-2.19169e-12	-2.19169
				2.5172	1.05915e-12					-7.48056	1.81851e-12	1.81851					7.48128	-1.18199e-12	-1.18199
				2.51952	1.9866e-12					-7.47824	1.4132e-12	1.4132					7.47896	-9.60257e-13	-0.960257
				2.52184	1.25108e-12					-7.47592	1.79825e-12	1.79825					7.47664	-3.20497e-12	-3.20497
				2.52416	1.06153e-12					-7.4736	1.43621e-13	0.143621					7.47432	-1.69816e-12	-1.69816
				2.52648	2.32277e-12					-7.47128	3.51128e-12	3.51128					7.472	-2.41425e-13	-0.241425
				2.5288	2.54688e-12					-7.46896	8.10001e-13	0.810001					7.46968	-1.68386e-12	-1.68386
				2.53112	1.65281e-12					-7.46664	1.29876e-12	1.29876					7.46736	-9.23302e-13	-0.923302
				2.53344	1.09968e-12					-7.46432	2.17614e-12	2.17614					7.46504	-1.04728e-12	-1.04728
				2.53576	1.19028e-12					-7.462	1.16763e-12	1.16763					7.46272	-3.91903e-12	-3.91903
				2.53808	1.71599e-12					-7.45968	2.33111e-12	2.33111					7.4604	-1.9342e-12	-1.9342
				2.5404	1.263e-12					-7.45736	1.1414e-12	1.1414					7.45808	-2.73528e-12	-2.73528
				2.54272	1.90911e-12					-7.45504	7.33707e-13	0.733707					7.45576	-2.47898e-12	-2.47898
				2.54504	1.80421e-12					-7.45272	7.33707e-13	0.733707					7.45344	-8.935e-13	-0.8935
				2.54736	2.18925e-12					-7.4504	1.30234e-12	1.30234					7.45112	-2.13447e-12	-2.13447
				2.54968	-7.9694e-13					-7.44808	2.41098e-12	2.41098					7.4488	-2.09871e-12	-2.09871
				2.552	-1.74704e-12					-7.44576	1.12988e-14	0.0112988					7.44648	-5.66866e-13	-0.566866
				2.55432	1.40045e-13					-7.44344	1.10087e-12	1.10087					7.44416	-4.79843e-13	-0.479843
				2.55664	8.42188e-13					-7.44112	-6.28855e-13	-0.628855					7.44184	-1.01509e-12	-1.01509
				2.55896	1.7446e-12					-7.4388	8.80335e-13	0.880335					7.43952	1.2574e-13	0.12574
				2.56128	7.79007e-13					-7.43648	1.2928e-12	1.2928					7.4372	-1.80628e-13	-0.180628
				2.5636	1.55506e-12					-7.43416	1.23558e-12	1.23558					7.43488	-7.88595e-13	-0.788595
				2.56592	1.44539e-12					-7.43184	1.32379e-12	1.32379					7.43256	-2.79966e-12	-2.79966
				2.56824	2.50873e-12					-7.42952	7.86159e-13	0.786159					7.43024	-1.36199e-12	-1.36199
				2.57056	2.10461e-12					-7.4272	7.68639e-14	0.0768639					7.42792	-1.6326e-12	-1.6326
				2.57288	2.98593e-13					-7.42488	1.82686e-12	1.82686					7.4256	-1.99023e-12	-1.99023
				2.5752	1.80778e-12					-7.42256	-3.7577e-14	-0.037577					7.42328	-1.23325e-12	-1.23325
				2.57752	1.76208e-15					-7.42024	6.27611e-13	0.627611					7.42096	-1.60637e-12	-1.60637
				2.57984	-2.85532e-13					-7.41792	-6.22895e-13	-0.622895					7.41864	-3.73664e-12	-3.73664
				2.58216	1.20935e-12					-7.4156	1.18789e-12	1.18789					7.41632	-2.86999e-12	-2.86999
				2.58448	6.61351e-14					-7.41328	1.75414e-12	1.75414					7.414	-9.2807e-13	-0.92807
				2.5868	2.15147e-13					-7.41096	1.3834e-12	1.3834					7.41168	-2.52154e-13	-0.252154
				2.58912	1.45612e-12					-7.40864	2.46141e-13	0.246141					7.40936	-2.08678e-12	-2.08678
				2.59144	1.99494e-12					-7.40632	-1.58253e-12	-1.58253					7.40704	-6.30047e-13	-0.630047
				2.59376	2.20356e-12					-7.404	-1.71366e-12	-1.71366					7.40472	-1.17603e-12	-1.17603
				2.59608	2.89056e-13					-7.40168	2.19164e-12	2.19164					7.4024	-1.6767e-12	-1.6767
				2.5984	-2.14162e-12					-7.39936	9.50668e-13	0.950668					7.40008	-9.59065e-13	-0.959065
				2.60072	7.65894e-13					-7.39704	-1.70651e-12	-1.70651					7.39776	-1.6171e-12	-1.6171
				2.60304	2.0915e-12					-7.39472	-5.09646e-13	-0.509646					7.39544	-7.45319e-14	-0.0745319
				2.60536	2.62198e-12					-7.3924	1.23081e-12	1.23081					7.39312	-1.80628e-13	-0.180628
				2.60768	1.3381e-12					-7.39008	2.17852e-12	2.17852					7.3908	-1.66323e-13	-0.166323
				2.61	4.02305e-13					-7.38776	1.73423e-13	0.173423					7.38848	-7.61177e-13	-0.761177
				2.61232	3.40316e-13					-7.38544	2.64225e-12	2.64225					7.38616	-1.46809e-12	-1.46809
				2.61464	1.71039e-13					-7.38312	1.91865e-12	1.91865					7.38384	-1.43829e-12	-1.43829
				2.61696	1.42154e-12					-7.3808	1.03769e-12	1.03769					7.38152	-8.4224e-13	-0.84224
				2.61928	1.6993e-12					-7.37848	-8.04923e-14	-0.0804923					7.3792	9.459e-13	0.9459
				2.6216	-1.61193e-14					-7.37616	2.36604e-13	0.236604					7.37688	-2.38838e-12	-2.38838
				2.62392	4.66678e-13					-7.37384	8.99408e-13	0.899408					7.37456	-2.4313e-12	-2.4313
				2.62624	1.02935e-12					-7.37152	1.8197e-12	1.8197					7.37224	-2.84257e-12	-2.84257
				2.62856	3.24819e-13					-7.3692	1.77798e-12	1.77798					7.36992	-2.42057e-12	-2.42057
				2.63088	1.40247e-12					-7.36688	3.50652e-12	3.50652					7.3676	7.62317e-13	0.762317
				2.6332	-3.1295e-13					-7.36456	2.38476e-12	2.38476					7.36528	-2.27394e-12	-2.27394
				2.63552	1.49545e-12					-7.36224	5.14362e-13	0.514362					7.36296	-2.04387e-12	-2.04387
				2.63784	3.09882e-12					-7.35992	4.28531e-13	0.428531					7.36064	-1.97234e-12	-1.97234
				2.64016	2.40383e-12					-7.3576	-1.35246e-12	-1.35246					7.35832	-5.83556e-13	-0.583556
				2.64248	1.40009e-12					-7.35528	-2.68481e-14	-0.0268481					7.356	-1.33815e-12	-1.33815
				2.6448	1.45492e-12					-7.35296	1.42429e-13	0.142429					7.35368	-3.80817e-12	-3.80817
				2.64712	6.33571e-13					-7.35064	2.32277e-12	2.32277					7.35136	-1.6779e-12	-1.6779
				2.64944	-5.95476e-13					-7.34832	3.08332e-12	3.08332					7.34904	6.9556e-13	0.69556
				2.65176	3.95153e-13					-7.346	1.78036e-12	1.78036					7.34672	3.12898e-13	0.312898
				2.65408	2.15826e-12					-7.34368	1.18551e-12	1.18551					7.3444	-6.97996e-13	-0.697996
				2.6564	2.30131e-12					-7.34136	-3.51928e-14	-0.0351928					7.34208	-9.24133e-14	-0.0924133
				2.65872	2.53377e-12					-7.33904	1.21412e-12	1.21412					7.33976	1.53003e-12	1.53003
				2.66104	8.28244e-14					-7.33672	6.9556e-13	0.69556					7.33744	-9.07805e-13	-0.907805
				2.66336	2.6351e-12					-7.3344	1.37386e-12	1.37386					7.33512	-2.62919e-12	-2.62919
				2.66568	1.04842e-12					-7.33208	9.76894e-13	0.976894					7.3328	-2.56124e-12	-2.56124
				2.668	2.83096e-13					-7.32976	1.71003e-12	1.71003					7.33048	-9.84099e-13	-0.984099
				2.67032	2.55522e-12					-7.32744	1.52526e-12	1.52526					7.32816	-1.05324e-12	-1.05324
				2.67264	2.73762e-12					-7.32512	1.52645e-12	1.52645					7.32584	-8.44624e-13	-0.844624
				2.67496	3.17988e-12					-7.3228	1.03411e-12	1.03411					7.32352	1.12627e-13	0.112627
				2.67728	1.49903e-12					-7.32048	9.06561e-13	0.906561					7.3212	-1.17364e-12	-1.17364
				2.6796	2.3025e-12					-7.31816	1.3226e-12	1.3226					7.31888	-2.90337e-12	-2.90337
				2.68192	2.86159e-12					-7.31584	-2.43809e-13	-0.243809					7.31656	-1.81976e-12	-1.81976
				2.68424	3.03362e-13					-7.31352	1.45612e-12	1.45612					7.31424	-2.62084e-12	-2.62084
				2.68656	1.58725e-12					-7.3112	8.13577e-13	0.813577					7.31192	-3.24192e-12	-3.24192
				2.68888	1.49582e-13					-7.30888	1.14498e-12	1.14498					7.3096	-2.45872e-12	-2.45872
				2.6912	1.86143e-12					-7.30656	1.12352e-12	1.12352					7.30728	7.30131e-13	0.730131
				2.69352	2.75073e-12					-7.30424	2.01521e-12	2.01521					7.30496	-3.33252e-12	-3.33252
				2.69584	2.27628e-12					-7.30192	7.49204e-13	0.749204					7.30264	-2.18692e-12	-2.18692
				2.69816	3.27286e-12					-7.2996	-1.03297e-12	-1.03297					7.30032	-6.30047e-13	-0.630047
				2.70048	9.62589e-13					-7.29728	9.87623e-13	0.987623					7.298	-1.88651e-12	-1.88651
				2.7028	8.52086e-14					-7.29496	-3.85668e-13	-0.385668					7.29568	-2.82231e-12	-2.82231
				2.70512	1.232e-12					-7.29264	6.14498e-13	0.614498					7.29336	-2.22507e-12	-2.22507
				2.70744	8.29075e-13					-7.29032	1.48711e-12	1.48711					7.29104	-2.80764e-13	-0.280764
				2.70976	5.30221e-14					-7.288	8.76758e-13	0.876758					7.28872	-1.56822e-12	-1.56822
				2.71208	1.14856e-12					-7.28568	-6.3803e-14	-0.063803					7.2864	-2.09036e-12	-2.09036
				2.7144	5.44164e-13					-7.28336	5.17938e-13	0.517938					7.28408	-5.94284e-13	-0.594284
				2.71672	1.90315e-12					-7.28104	5.03633e-13	0.503633					7.28176	-7.09917e-13	-0.709917
				2.71904	5.42972e-13					-7.27872	-5.52561e-13	-0.552561					7.27944	-1.40133e-12	-1.40133
				2.72136	1.26061e-12					-7.2764	-3.45137e-13	-0.345137					7.27712	-1.56584e-12	-1.56584
				2.72368	2.01044e-12					-7.27408	-3.39176e-13	-0.339176					7.2748	-2.80402e-14	-0.0280402
				2.726	1.90315e-12					-7.27176	2.10938e-12	2.10938					7.27248	-2.46193e-13	-0.246193
				2.72832	3.15246e-12					-7.26944	1.32379e-12	1.32379					7.27016	-1.53246e-12	-1.53246
				2.73064	2.5898e-12					-7.26712	5.58469e-13	0.558469					7.26784	-1.51816e-12	-1.51816
				2.73296	1.96395e-12					-7.2648	1.17395e-13	0.117395					7.26552	8.42188e-13	0.842188
				2.73528	1.96514e-12					-7.26248	2.41456e-12	2.41456					7.2632	-1.92466e-12	-1.92466
				2.7376	5.95424e-13					-7.26016	1.74103e-12	1.74103					7.26088	-1.90797e-12	-1.90797
				2.73992	2.41933e-12					-7.25784	-1.24636e-12	-1.24636					7.25856	3.51407e-14	0.0351407
				2.74224	3.52237e-13					-7.25552	5.82311e-13	0.582311					7.25624	1.35276e-13	0.135276
				2.74456	2.13955e-13					-7.2532	-8.33895e-13	-0.833895					7.25392	-1.90439e-12	-1.90439
				2.74688	1.67463e-13					-7.25088	2.82464e-12	2.82464					7.2516	-1.68267e-12	-1.68267
				2.7492	1.28088e-12					-7.24856	8.63645e-13	0.863645					7.24928	-8.30319e-13	-0.830319
				2.75152	8.88679e-13					-7.24624	1.96435e-14	0.0196435					7.24696	4.1661e-13	0.41661
				2.75384	2.19915e-13					-7.24392	3.6535e-13	0.36535					7.24464	-6.16934e-13	-0.616934
				2.75616	1.36671e-12					-7.2416	-4.01165e-13	-0.401165					7.24232	-1.5321e-13	-0.15321
				2.75848	1.38853e-13					-7.23928	1.57771e-12	1.57771					7.24	-1.4216e-12	-1.4216
				2.7608	4.36876e-13					-7.23696	-1.60363e-13	-0.160363					7.23768	7.96888e-13	0.796888
				2.76312	1.46804e-12					-7.23464	-7.75482e-13	-0.775482					7.23536	7.4086e-13	0.74086
				2.76544	1.5336e-12					-7.23232	1.66235e-12	1.66235					7.23304	-5.19183e-13	-0.519183
				2.76776	2.05335e-12					-7.23	1.99375e-12	1.99375					7.23072	8.95832e-13	0.895832
				2.77008	-1.18639e-13					-7.22768	1.88765e-12	1.88765					7.2284	-2.97453e-13	-0.297453
				2.7724	5.01249e-13					-7.22536	3.08571e-12	3.08571					7.22608	1.317e-13	0.1317
				2.77472	2.52102e-13					-7.22304	2.23336e-12	2.23336					7.22376	7.44797e-14	0.0744797
				2.77704	7.58741e-13					-7.22072	1.73745e-12	1.73745					7.22144	-2.4921e-12	-2.4921
				2.77936	3.82719e-12					-7.2184	1.82447e-12	1.82447					7.21912	-2.11778e-12	-2.11778
				2.78168	4.92904e-13					-7.21608	7.56357e-13	0.756357					7.2168	-1.59922e-12	-1.59922
				2.784	1.04961e-12					-7.21376	1.5336e-12	1.5336					7.21448	-8.43432e-13	-0.843432
				2.78632	1.14498e-12					-7.21144	1.73745e-12	1.73745					7.21216	-2.12493e-12	-2.12493
				2.78864	1.69811e-12					-7.20912	4.70616e-14	0.0470616					7.20984	-2.64707e-12	-2.64707
				2.79096	1.95322e-12					-7.2068	2.68993e-12	2.68993					7.20752	1.32379e-12	1.32379
				2.79328	1.86381e-12					-7.20448	1.55267e-12	1.55267					7.2052	2.56834e-12	2.56834
				2.7956	1.75771e-12					-7.20216	4.49989e-13	0.449989					7.20288	1.83639e-12	1.83639
				2.79792	1.05319e-12					-7.19984	1.09133e-12	1.09133					7.20056	7.36091e-13	0.736091
				2.80024	-4.05934e-13					-7.19752	6.97944e-13	0.697944					7.19824	1.10922e-12	1.10922
				2.80256	1.37386e-12					-7.1952	1.94726e-12	1.94726					7.19592	-1.99738e-12	-1.99738
				2.80488	6.1569e-13					-7.19288	1.20101e-12	1.20101					7.1936	-3.6421e-13	-0.36421
				2.8072	2.18091e-12					-7.19056	1.75771e-12	1.75771					7.19128	-4.30968e-13	-0.430968
				2.80952	8.88679e-13					-7.18824	4.23763e-13	0.423763					7.18896	-1.15218e-12	-1.15218
				2.81184	1.06749e-12					-7.18592	4.15418e-13	0.415418					7.18664	6.01746e-14	0.0601746
				2.81416	-2.59306e-13					-7.1836	8.00464e-13	0.800464					7.18432	1.32892e-13	0.132892
				2.81648	1.31664e-12					-7.18128	-3.6421e-13	-0.36421					7.182	-1.77052e-13	-0.177052
				2.8188	6.85193e-14					-7.17896	2.15111e-12	2.15111					7.17968	-3.61826e-13	-0.361826
				2.82112	1.39293e-12					-7.17664	4.11011e-14	0.0411011					7.17736	-1.35329e-13	-0.135329
				2.82344	4.20187e-13					-7.17432	2.12011e-12	2.12011					7.17504	-1.21417e-12	-1.21417
				2.82576	-3.97589e-13					-7.172	1.55506e-12	1.55506					7.17272	-2.79572e-13	-0.279572
				2.82808	4.36876e-13					-7.16968	1.08895e-12	1.08895					7.1704	-1.39179e-12	-1.39179
				2.8304	3.6535e-13					-7.16736	2.67324e-12	2.67324					7.16808	-3.0035e-12	-3.0035
				2.83272	2.6796e-14					-7.16504	2.50396e-12	2.50396					7.16576	-1.84241e-12	-1.84241
				2.83504	7.39668e-13					-7.16272	2.48525e-13	0.248525					7.16344	-7.12302e-13	-0.712302
				2.83736	1.55029e-12					-7.1604	-4.71499e-13	-0.471499					7.16112	-1.2249e-12	-1.2249
				2.83968	3.47314e-12					-7.15808	1.35121e-12	1.35121					7.1588	7.61125e-13	0.761125
				2.842	8.00464e-13					-7.15576	9.84047e-13	0.984047					7.15648	-1.93181e-12	-1.93181
				2.84432	-4.82228e-13					-7.15344	6.31187e-13	0.631187					7.15416	-1.47047e-12	-1.47047
				2.84664	8.61261e-13					-7.15112	1.44181e-12	1.44181					7.15184	-1.03417e-12	-1.03417
				2.84896	-1.87781e-13					-7.1488	2.14157e-12	2.14157					7.14952	-3.28448e-13	-0.328448
				2.85128	-1.14861e-12					-7.14648	2.1523e-12	2.1523					7.1472	-4.75075e-13	-0.475075
				2.8536	7.6947e-13					-7.14416	2.07481e-12	2.07481					7.14488	-7.58793e-13	-0.758793
				2.85592	7.89735e-13					-7.14184	1.97587e-12	1.97587					7.14256	-2.59342e-12	-2.59342
				2.85824	6.25227e-13					-7.13952	3.92769e-13	0.392769					7.14024	-1.77922e-12	-1.77922
				2.86056	-3.49905e-13					-7.1372	-2.23543e-13	-0.223543					7.13792	-2.22626e-12	-2.22626
				2.86288	-5.30742e-14					-7.13488	4.6191e-13	0.46191					7.1356	-1.73989e-12	-1.73989
				2.8652	2.09508e-12					-7.13256	1.28088e-12	1.28088					7.13328	-3.09291e-12	-3.09291
				2.86752	9.53052e-13					-7.13024	1.86381e-12	1.86381					7.13096	-1.09496e-12	-1.09496
				2.86984	6.97944e-13					-7.12792	-9.95658e-14	-0.0995658					7.12864	-1.13907e-12	-1.13907
				2.87216	1.53479e-12					-7.1256	-9.26878e-13	-0.926878					7.12632	-2.43809e-13	-0.243809
				2.87448	1.14259e-12					-7.12328	1.01504e-12	1.01504					7.124	-6.64618e-13	-0.664618
				2.8768	9.22058e-13					-7.12096	1.01027e-12	1.01027					7.12168	-1.11881e-12	-1.11881
				2.87912	2.53294e-13					-7.11864	2.35018e-12	2.35018					7.11936	-2.15831e-12	-2.15831
				2.88144	-6.9442e-13					-7.11632	3.50532e-12	3.50532					7.11704	5.48933e-13	0.548933
				2.88376	-5.78787e-13					-7.114	4.70616e-14	0.0470616					7.11472	-1.06755e-12	-1.06755
				2.88608	-2.25928e-13					-7.11168	3.18703e-12	3.18703					7.1124	-1.84479e-12	-1.84479
				2.8884	2.20475e-12					-7.10936	1.3083e-12	1.3083					7.11008	-6.38392e-13	-0.638392
				2.89072	2.33707e-12					-7.10704	3.33605e-12	3.33605					7.10776	-5.90708e-13	-0.590708
				2.89304	5.82311e-13					-7.10472	2.91166e-12	2.91166					7.10544	-1.72796e-12	-1.72796
				2.89536	1.16286e-12					-7.1024	3.08213e-12	3.08213					7.10312	-5.66866e-13	-0.566866
				2.89768	1.91149e-12					-7.10008	1.59559e-12	1.59559					7.1008	-2.08202e-12	-2.08202
				2.9	2.7543e-12					-7.09776	-6.58657e-13	-0.658657					7.09848	-2.58866e-12	-2.58866
				2.90232	3.16475e-13					-7.09544	1.02339e-12	1.02339					7.09616	9.57821e-13	0.957821
				2.90464	9.13713e-13					-7.09312	2.7853e-12	2.7853					7.09384	3.6535e-13	0.36535
				2.90696	2.99785e-13					-7.0908	6.06153e-13	0.606153					7.09152	-2.32401e-12	-2.32401
				2.90928	9.04176e-13					-7.08848	2.23491e-13	0.223491					7.0892	-2.2656e-12	-2.2656
				2.9116	-1.3453e-12					-7.08616	-1.13509e-14	-0.0113509					7.08688	-8.8837e-14	-0.088837
				2.91392	-1.27735e-12					-7.08384	-1.03142e-13	-0.103142					7.08456	-1.64333e-12	-1.64333
				2.91624	9.20866e-13					-7.08152	1.40009e-12	1.40009					7.08224	-3.94287e-12	-3.94287
				2.91856	2.07994e-13					-7.0792	-1.1653e-12	-1.1653					7.07992	-2.2811e-12	-2.2811
				2.92088	-1.06755e-12					-7.07688	4.03497e-13	0.403497					7.0776	-3.30832e-13	-0.330832
				2.9232	9.5186e-13					-7.07456	2.46141e-13	0.246141					7.07528	9.5186e-13	0.95186
				2.92552	-2.29504e-13					-7.07224	-8.482e-13	-0.8482					7.07296	-4.22623e-13	-0.422623
				2.92784	7.56357e-13					-7.06992	-4.33352e-13	-0.433352					7.07064	-1.68624e-12	-1.68624
				2.93016	2.02236e-12					-7.0676	-7.21477e-14	-0.0721477					7.06832	-2.71621e-12	-2.71621
				2.93248	1.52168e-12					-7.06528	8.68414e-13	0.868414					7.066	-2.0844e-12	-2.0844
				2.9348	1.74699e-12					-7.06296	2.75788e-12	2.75788					7.06368	-9.10189e-13	-0.910189
				2.93712	-3.76131e-13					-7.06064	9.18481e-13	0.918481					7.06136	-9.83737e-14	-0.0983737
				2.93944	2.287e-12					-7.05832	6.6695e-13	0.66695					7.05904	-1.08543e-12	-1.08543
				2.94176	2.43721e-12					-7.056	4.1661e-13	0.41661					7.05672	-4.53617e-13	-0.453617
				2.94408	1.74616e-13					-7.05368	1.84152e-13	0.184152					7.0544	-3.07026e-12	-3.07026
				2.9464	1.47197e-13					-7.05136	1.9866e-12	1.9866					7.05208	-1.03297e-12	-1.03297
				2.94872	-1.00675e-12					-7.04904	1.61586e-12	1.61586					7.04976	-2.41223e-12	-2.41223
				2.95104	-2.79572e-13					-7.04672	1.36671e-12	1.36671					7.04744	-2.17977e-12	-2.17977
				2.95336	9.22058e-13					-7.0444	1.81017e-12	1.81017					7.04512	-3.29557e-12	-3.29557
				2.95568	2.47893e-12					-7.04208	1.07345e-12	1.07345					7.0428	-1.67432e-12	-1.67432
				2.958	1.6099e-12					-7.03976	1.35836e-12	1.35836					7.04048	-2.14401e-12	-2.14401
				2.96032	-1.23086e-12					-7.03744	-3.55866e-13	-0.355866					7.03816	-3.39809e-12	-3.39809
				2.96264	9.43515e-13					-7.03512	-2.96261e-13	-0.296261					7.03584	-1.89009e-12	-1.89009
				2.96496	7.89735e-13					-7.0328	-3.15335e-13	-0.315335					7.03352	-1.53723e-12	-1.53723
				2.96728	1.74937e-12					-7.03048	6.22842e-13	0.622842					7.0312	-3.61266e-12	-3.61266
				2.9696	2.02832e-12					-7.02816	9.73318e-13	0.973318					7.02888	-2.25249e-12	-2.25249
				2.97192	1.94249e-12					-7.02584	-2.95069e-13	-0.295069					7.02656	-1.08423e-12	-1.08423
				2.97424	4.98865e-13					-7.02352	-2.43809e-13	-0.243809					7.02424	-5.21567e-13	-0.521567
				2.97656	1.01385e-12					-7.0212	1.24392e-12	1.24392					7.02192	-3.84476e-13	-0.384476
				2.97888	-9.49528e-13					-7.01888	2.14514e-12	2.14514					7.0196	-2.55647e-12	-2.55647
				2.9812	2.37999e-12					-7.01656	9.71295e-14	0.0971295					7.01728	-1.03893e-12	-1.03893
				2.98352	4.70616e-14					-7.01424	1.13783e-12	1.13783					7.01496	-2.10824e-12	-2.10824
				2.98584	1.72791e-12					-7.01192	2.01282e-12	2.01282					7.01264	-1.88651e-12	-1.88651
				2.98816	7.76622e-13					-7.0096	1.28565e-12	1.28565					7.01032	-5.01301e-13	-0.501301
				2.99048	7.08673e-13					-7.00728	4.38509e-12	4.38509					7.008	-9.25686e-13	-0.925686
				2.9928	1.45492e-12					-7.00496	3.21684e-12	3.21684					7.00568	-2.92685e-13	-0.292685
				2.99512	1.79348e-12					-7.00264	1.41916e-12	1.41916					7.00336	-1.12715e-12	-1.12715
				2.99744	1.67665e-12					-7.00032	8.00464e-13	0.800464					7.00104	-7.01573e-13	-0.701573
				2.99976	1.64685e-12					-6.998	2.06802e-13	0.206802					6.99872	-2.51951e-12	-2.51951
				3.00208	1.11875e-12					-6.99568	2.40979e-12	2.40979					6.9964	-3.16682e-12	-3.16682
				3.0044	2.38118e-12					-6.99336	1.46804e-12	1.46804					6.99408	-1.63021e-12	-1.63021
				3.00672	1.44896e-12					-6.99104	4.09458e-13	0.409458					6.99176	-1.4725e-13	-0.14725
				3.00904	-3.5825e-13					-6.98872	-8.97076e-13	-0.897076					6.98944	-1.6779e-12	-1.6779
				3.01136	9.37555e-13					-6.9864	1.41237e-13	0.141237					6.98712	-1.90678e-12	-1.90678
				3.01368	2.79007e-12					-6.98408	4.97673e-13	0.497673					6.9848	-1.57978e-13	-0.157978
				3.016	2.04143e-12					-6.98176	8.21922e-13	0.821922					6.98248	-2.40233e-13	-0.240233
				3.01832	1.27492e-12					-6.97944	6.22842e-13	0.622842					6.98016	-1.12119e-12	-1.12119
				3.02064	2.35138e-12					-6.97712	-9.08997e-13	-0.908997					6.97784	-4.85804e-13	-0.485804
				3.02296	4.40452e-13					-6.9748	4.15418e-13	0.415418					6.97552	-1.9783e-12	-1.9783
				3.02528	1.09372e-12					-6.97248	2.07839e-12	2.07839					6.9732	-2.89622e-12	-2.89622
				3.0276	5.46549e-13					-6.97016	3.10001e-12	3.10001					6.97088	-2.07367e-12	-2.07367
				3.02992	4.80983e-13					-6.96784	2.68516e-12	2.68516					6.96856	-1.78876e-12	-1.78876
				3.03224	1.10243e-13					-6.96552	1.30949e-12	1.30949					6.96624	-1.04132e-12	-1.04132
				3.03456	6.78871e-13					-6.9632	9.67357e-13	0.967357					6.96392	-1.15576e-12	-1.15576
				3.03688	7.30131e-13					-6.96088	-2.92323e-14	-0.0292323					6.9616	-1.48955e-12	-1.48955
				3.0392	-1.66002e-12					-6.95856	3.46598e-12	3.46598					6.95928	-1.79115e-12	-1.79115
				3.04152	2.44949e-13					-6.95624	2.8449e-12	2.8449					6.95696	-5.28159e-12	-5.28159
				3.04384	1.19505e-12					-6.95392	2.64463e-12	2.64463					6.95464	-1.65048e-12	-1.65048
				3.04616	-1.94493e-12					-6.9516	1.57652e-12	1.57652					6.95232	-8.72042e-13	-0.872042
				3.04848	7.02713e-13					-6.94928	1.443e-12	1.443					6.95	-2.35024e-12	-2.35024
				3.0508	4.64294e-13					-6.94696	6.25227e-13	0.625227					6.94768	-8.74426e-13	-0.874426
				3.05312	3.60582e-13					-6.94464	2.0772e-12	2.0772					6.94536	-3.31345e-12	-3.31345
				3.05544	-4.75075e-13					-6.94232	-7.51641e-13	-0.751641					6.94304	-3.33252e-12	-3.33252
				3.05776	-8.43432e-13					-6.94	-7.48064e-13	-0.748064					6.94072	-2.89145e-12	-2.89145
				3.06008	-1.29643e-12					-6.93768	-8.00516e-13	-0.800516					6.9384	-1.95565e-12	-1.95565
				3.0624	7.02713e-13					-6.93536	5.84695e-13	0.584695					6.93608	-1.62783e-12	-1.62783
				3.06472	2.0561e-13					-6.93304	1.52287e-12	1.52287					6.93376	-3.61826e-13	-0.361826
				3.06704	-2.59306e-13					-6.93072	4.03497e-13	0.403497					6.93144	-2.45395e-12	-2.45395
				3.06936	-3.57058e-13					-6.9284	1.06153e-12	1.06153					6.92912	-4.949e-12	-4.949
				3.07168	2.09186e-13					-6.92608	5.31051e-13	0.531051					6.9268	-3.33371e-12	-3.33371
				3.074	1.25584e-12					-6.92376	8.4338e-13	0.84338					6.92448	-1.44782e-12	-1.44782
				3.07632	1.45731e-12					-6.92144	2.12763e-13	0.212763					6.92216	-2.22626e-12	-2.22626
				3.07864	1.59321e-12					-6.91912	1.42274e-12	1.42274					6.91984	-2.3705e-12	-2.3705
				3.08096	1.45731e-12					-6.9168	8.76758e-13	0.876758					6.91752	-7.24222e-13	-0.724222
				3.08328	3.2073e-12					-6.91448	-1.28331e-12	-1.28331					6.9152	-1.17126e-12	-1.17126
				3.0856	1.37267e-12					-6.91216	-1.13871e-13	-0.113871					6.91288	-3.01781e-12	-3.01781
				3.08792	2.26912e-12					-6.90984	1.86381e-12	1.86381					6.91056	1.14021e-12	1.14021
				3.09024	2.17852e-12					-6.90752	1.58248e-12	1.58248					6.90824	-1.36676e-12	-1.36676
				3.09256	3.29432e-12					-6.9052	1.27015e-12	1.27015					6.90592	-2.55766e-12	-2.55766
				3.09488	1.91269e-12					-6.90288	6.99136e-13	0.699136					6.9036	-1.54081e-12	-1.54081
				3.0972	1.30234e-12					-6.90056	2.38476e-12	2.38476					6.90128	-1.74585e-12	-1.74585
				3.09952	6.64566e-13					-6.89824	1.61943e-12	1.61943					6.89896	-2.81038e-12	-2.81038
				3.10184	1.19266e-12					-6.89592	1.01027e-12	1.01027					6.89664	-2.60058e-12	-2.60058
				3.10416	3.09047e-12					-6.8936	-4.57194e-13	-0.457194					6.89432	-4.35534e-12	-4.35534
				3.10648	2.29773e-12					-6.89128	-4.70307e-13	-0.470307					6.892	-8.06477e-13	-0.806477
				3.1088	3.62096e-12					-6.88896	5.95424e-13	0.595424					6.88968	-9.20918e-13	-0.920918
				3.11112	2.63986e-12					-6.88664	2.15826e-12	2.15826					6.88736	-1.02582e-12	-1.02582
				3.11344	1.65519e-12					-6.88432	2.20594e-12	2.20594					6.88504	-1.35961e-12	-1.35961
				3.11576	2.26078e-12					-6.882	-6.3803e-14	-0.063803					6.88272	-1.18914e-12	-1.18914
				3.11808	1.8209e-12					-6.87968	-7.3972e-13	-0.73972					6.8804	-3.58048e-12	-3.58048
				3.1204	1.42274e-12					-6.87736	2.04739e-12	2.04739					6.87808	-2.03314e-12	-2.03314
				3.12272	1.13544e-12					-6.87504	1.49665e-12	1.49665					6.87576	-9.4476e-13	-0.94476
				3.12504	2.58741e-12					-6.87272	1.34167e-12	1.34167					6.87344	-8.45816e-13	-0.845816
				3.12736	2.26078e-12					-6.8704	1.46565e-12	1.46565					6.87112	-2.11623e-13	-0.211623
				3.12968	1.70407e-12					-6.86808	-1.10295e-13	-0.110295					6.8688	6.01385e-13	0.601385
				3.132	2.78888e-12					-6.86576	-3.20103e-13	-0.320103					6.86648	-5.78787e-13	-0.578787
				3.13432	6.47876e-13					-6.86344	-7.09917e-13	-0.709917					6.86416	-1.49634e-13	-0.149634
				3.13664	1.18909e-12					-6.86112	-7.54025e-13	-0.754025					6.86184	-1.25351e-12	-1.25351
				3.13896	2.63748e-12					-6.8588	1.35121e-12	1.35121					6.85952	-2.36097e-12	-2.36097
				3.14128	3.43976e-12					-6.85648	1.54195e-12	1.54195					6.8572	-1.52412e-12	-1.52412
				3.1436	-1.3056e-13					-6.85416	-1.14861e-12	-1.14861					6.85488	-1.03774e-12	-1.03774
				3.14592	-1.33577e-12					-6.85184	4.58334e-13	0.458334					6.85256	-1.06397e-12	-1.06397
				3.14824	1.6031e-13					-6.84952	3.57089e-12	3.57089					6.85024	-1.90559e-12	-1.90559
				3.15056	1.52287e-12					-6.8472	1.45731e-12	1.45731					6.84792	-2.05579e-12	-2.05579
				3.15288	1.33333e-12					-6.84488	3.04041e-12	3.04041					6.8456	-2.36216e-12	-2.36216
				3.1552	-3.73747e-13					-6.84256	3.71275e-12	3.71275					6.84328	-1.60363e-13	-0.160363
				3.15752	1.38101e-12					-6.84024	8.75566e-13	0.875566					6.84096	-5.03685e-13	-0.503685
				3.15984	8.62453e-13					-6.83792	1.82566e-12	1.82566					6.83864	3.3674e-13	0.33674
				3.16216	9.35532e-14					-6.8356	1.48115e-12	1.48115					6.83632	1.17395e-13	0.117395
				3.16448	1.94881e-13					-6.83328	2.18687e-12	2.18687					6.834	-2.63038e-12	-2.63038
				3.1668	1.35956e-12					-6.83096	6.22842e-13	0.622842					6.83168	-1.42279e-12	-1.42279
				3.16912	2.23574e-12					-6.82864	2.54211e-12	2.54211					6.82936	-8.91115e-13	-0.891115
				3.17144	3.43893e-13					-6.82632	1.37505e-12	1.37505					6.82704	9.35532e-14	0.0935532
				3.17376	-5.44216e-13					-6.824	1.87216e-12	1.87216					6.82472	-1.03893e-12	-1.03893
				3.17608	1.63255e-12					-6.82168	3.33128e-12	3.33128					6.8224	-1.33815e-12	-1.33815
				3.1784	2.36091e-12					-6.81936	4.60324e-12	4.60324					6.82008	-1.52769e-12	-1.52769
				3.18072	8.27882e-13					-6.81704	5.37691e-12	5.37691					6.81776	-1.86386e-12	-1.86386
				3.18304	6.29995e-13					-6.81472	3.32889e-12	3.32889					6.81544	-8.63697e-13	-0.863697
				3.18536	1.83758e-12					-6.8124	3.1012e-12	3.1012					6.81312	-1.21775e-12	-1.21775
				3.18768	1.62658e-12					-6.81008	2.56357e-12	2.56357					6.8108	7.00329e-13	0.700329
				3.19	2.82464e-12					-6.80776	2.74e-12	2.74					6.80848	-1.23563e-12	-1.23563
				3.19232	1.61824e-12					-6.80544	-2.18775e-13	-0.218775					6.80616	-2.56958e-12	-2.56958
				3.19464	1.43585e-12					-6.80312	9.19674e-13	0.919674					6.80384	-1.14742e-12	-1.14742
				3.19696	2.17495e-12					-6.8008	2.34184e-12	2.34184					6.80152	-2.23543e-13	-0.223543
				3.19928	2.43602e-12					-6.79848	1.04365e-12	1.04365					6.7992	-1.73476e-13	-0.173476
				3.2016	5.1913e-13					-6.79616	2.27866e-12	2.27866					6.79688	-9.14957e-13	-0.914957
				3.20392	3.05746e-13					-6.79384	5.71582e-13	0.571582					6.79456	-3.0488e-12	-3.0488
				3.20624	7.81391e-13					-6.79152	2.68791e-13	0.268791					6.79224	-3.12271e-12	-3.12271
				3.20856	1.12233e-12					-6.7892	1.24511e-12	1.24511					6.78992	5.65622e-13	0.565622
				3.21088	1.79705e-12					-6.78688	9.94775e-13	0.994775					6.7876	2.37796e-13	0.237796
				3.2132	2.32634e-12					-6.78456	4.60718e-13	0.460718					6.78528	-1.21023e-13	-0.121023
				3.21552	1.54671e-12					-6.78224	1.66473e-12	1.66473					6.78296	-1.4657e-12	-1.4657
				3.21784	1.97348e-12					-6.77992	2.75907e-12	2.75907					6.78064	-2.16904e-12	-2.16904
				3.22016	2.87232e-12					-6.7776	2.44078e-12	2.44078					6.77832	-8.45816e-13	-0.845816
				3.22248	1.34048e-12					-6.77528	1.8197e-12	1.8197					6.776	-1.60399e-12	-1.60399
				3.2248	-5.43024e-13					-6.77296	4.5186e-12	4.5186					6.77368	-1.13669e-12	-1.13669
				3.22712	8.36227e-13					-6.77064	3.28479e-12	3.28479					6.77136	-1.69339e-12	-1.69339
				3.22944	2.07004e-12					-6.76832	2.07481e-12	2.07481					6.76904	-3.07265e-12	-3.07265
				3.23176	2.36807e-12					-6.766	7.12249e-13	0.712249					6.76672	-1.92943e-12	-1.92943
				3.23408	1.78394e-12					-6.76368	1.5193e-12	1.5193					6.7644	-1.58134e-12	-1.58134
				3.2364	1.49069e-12					-6.76136	4.65486e-13	0.465486					6.76208	-1.20225e-12	-1.20225
				3.23872	1.22247e-12					-6.75904	2.74751e-13	0.274751					6.75976	-1.70412e-12	-1.70412
				3.24104	3.10514e-13					-6.75672	2.25839e-12	2.25839					6.75744	-3.02139e-12	-3.02139
				3.24336	1.65639e-12					-6.7544	1.55625e-12	1.55625					6.75512	-2.81956e-13	-0.281956
				3.24568	-9.12212e-14					-6.75208	6.91984e-13	0.691984					6.7528	-5.27527e-13	-0.527527
				3.248	2.95219e-12					-6.74976	1.06988e-12	1.06988					6.75048	-1.63939e-13	-0.163939
				3.25032	2.38476e-12					-6.74744	1.66235e-12	1.66235					6.74816	-2.45037e-12	-2.45037
				3.25264	1.64566e-12					-6.74512	5.69198e-13	0.569198					6.74584	-1.96758e-12	-1.96758
				3.25496	2.26197e-12					-6.7428	1.81768e-13	0.181768					6.74352	-2.01287e-12	-2.01287
				3.25728	2.1523e-12					-6.74048	1.33571e-12	1.33571					6.7412	-7.9098e-13	-0.79098
				3.2596	1.49188e-12					-6.73816	-1.84204e-13	-0.184204					6.73888	2.1821e-12	2.1821
				3.26192	2.33588e-12					-6.73584	1.73423e-13	0.173423					6.73656	-3.59442e-13	-0.359442
				3.26424	1.68381e-12					-6.73352	1.15213e-12	1.15213					6.73424	9.83216e-14	0.0983216
				3.26656	2.47655e-12					-6.7312	1.9401e-12	1.9401					6.73192	7.49204e-13	0.749204
				3.26888	1.91269e-12					-6.72888	7.64702e-13	0.764702					6.7296	3.55814e-13	0.355814
				3.2712	4.43873e-12					-6.72656	-8.47008e-13	-0.847008					6.72728	-8.83963e-13	-0.883963
				3.27352	3.88798e-12					-6.72424	2.16303e-12	2.16303					6.72496	-3.04284e-12	-3.04284
				3.27584	3.38492e-12					-6.72192	4.18243e-12	4.18243					6.72264	-8.72042e-13	-0.872042
				3.27816	-1.35329e-13					-6.7196	1.29995e-12	1.29995					6.72032	-4.40504e-13	-0.440504
				3.28048	1.04961e-12					-6.71728	1.35276e-13	0.135276					6.718	-1.40968e-12	-1.40968
				3.2828	6.76487e-13					-6.71496	1.00074e-12	1.00074					6.71568	-2.46468e-12	-2.46468
				3.28512	-9.91251e-13					-6.71264	9.44708e-13	0.944708					6.71336	-4.48849e-13	-0.448849
				3.28744	2.23491e-13					-6.71032	1.08895e-12	1.08895					6.71104	-1.68505e-12	-1.68505
				3.28976	2.0009e-12					-6.708	-1.57978e-13	-0.157978					6.70872	-1.25351e-12	-1.25351
				3.29208	2.18568e-12					-6.70568	2.75943e-13	0.275943					6.7064	-8.12437e-13	-0.812437
				3.2944	8.45764e-13					-6.70336	1.79705e-12	1.79705					6.70408	-2.44203e-12	-2.44203
				3.29672	1.8197e-12					-6.70104	8.42188e-13	0.842188					6.70176	-9.38799e-13	-0.938799
				3.29904	2.31323e-12					-6.69872	6.18074e-13	0.618074					6.69944	-5.1799e-13	-0.51799
				3.30136	3.29588e-13					-6.6964	-1.74108e-12	-1.74108					6.69712	-1.99738e-12	-1.99738
				3.30368	2.52102e-13					-6.69408	-1.60637e-12	-1.60637					6.6948	-1.21023e-13	-0.121023
				3.306	1.50022e-12					-6.69176	2.41373e-13	0.241373					6.69248	-2.10824e-12	-2.10824
				3.30832	6.09729e-13					-6.68944	1.26419e-12	1.26419					6.69016	-7.87403e-13	-0.787403
				3.31064	5.96616e-13					-6.68712	4.05882e-13	0.405882					6.68784	-3.51097e-13	-0.351097
				3.31296	1.72195e-12					-6.6848	1.39651e-12	1.39651					6.68552	-2.38004e-12	-2.38004
				3.31528	1.48115e-12					-6.68248	1.93689e-13	0.193689					6.6832	-9.30454e-13	-0.930454
				3.3176	1.27134e-12					-6.68016	2.77136e-13	0.277136					6.68088	9.05368e-13	0.905368
				3.31992	1.62539e-12					-6.67784	6.26419e-13	0.626419					6.67856	-1.25792e-13	-0.125792
				3.32224	1.32975e-12					-6.67552	-4.94979e-14	-0.0494979					6.67624	-8.52969e-13	-0.852969
				3.32456	5.51317e-13					-6.6732	9.88815e-13	0.988815					6.67392	-1.38703e-12	-1.38703
				3.32688	2.7543e-12					-6.67088	1.56698e-12	1.56698					6.6716	-2.51355e-12	-2.51355
				3.3292	1.79467e-12					-6.66856	2.8306e-12	2.8306					6.66928	-1.30716e-12	-1.30716
				3.33152	1.63255e-12					-6.66624	-6.93228e-13	-0.693228					6.66696	-6.27663e-13	-0.627663
				3.33384	2.07481e-12					-6.66392	2.78328e-13	0.278328					6.66464	8.82719e-13	0.882719
				3.33616	1.89838e-12					-6.6616	1.5181e-12	1.5181					6.66232	-1.32623e-12	-1.32623
				3.33848	1.74341e-12					-6.65928	1.17359e-12	1.17359					6.66	-2.46193e-13	-0.246193
				3.3408	2.68791e-13					-6.65696	-1.96125e-13	-0.196125					6.65768	-5.56137e-13	-0.556137
				3.34312	1.62897e-12					-6.65464	-1.4216e-12	-1.4216					6.65536	1.48751e-14	0.0148751
				3.34544	-1.38905e-13					-6.65232	-5.37064e-13	-0.537064					6.65304	-2.175e-12	-2.175
				3.34776	3.74887e-13					-6.65	7.36091e-13	0.736091					6.65072	-1.50862e-12	-1.50862
				3.35008	1.48473e-12					-6.64768	4.85752e-13	0.485752					6.6484	-1.29762e-12	-1.29762
				3.3524	-1.35007e-12					-6.64536	7.11057e-13	0.711057					6.64608	-1.23921e-12	-1.23921
				3.35472	2.65536e-12					-6.64304	4.75023e-13	0.475023					6.64376	-2.52071e-12	-2.52071
				3.35704	2.16303e-12					-6.64072	7.48012e-13	0.748012					6.64144	-1.5265e-12	-1.5265
				3.35936	2.01521e-12					-6.6384	-2.89109e-13	-0.289109					6.63912	-1.2559e-12	-1.2559
				3.36168	-1.21023e-13					-6.63608	-5.02493e-13	-0.502493					6.6368	3.27565e-14	0.0327565
				3.364	1.68619e-12					-6.63376	-1.29285e-12	-1.29285					6.63448	-1.37868e-12	-1.37868
				3.36632	1.28445e-12					-6.63144	-7.32567e-13	-0.732567					6.63216	-6.47929e-13	-0.647929
				3.36864	2.05097e-12					-6.62912	-4.03549e-13	-0.403549					6.62984	-1.52292e-12	-1.52292
				3.37096	1.27253e-12					-6.6268	7.76622e-13	0.776622					6.62752	-3.61826e-13	-0.361826
				3.37328	1.06034e-12					-6.62448	5.82311e-13	0.582311					6.6252	-5.22759e-13	-0.522759
				3.3756	1.49545e-12					-6.62216	1.16644e-12	1.16644					6.62288	-1.94731e-12	-1.94731
				3.37792	1.7756e-12					-6.61984	-4.75075e-13	-0.475075					6.62056	-2.92721e-12	-2.92721
				3.38024	1.0961e-12					-6.61752	6.31187e-13	0.631187					6.61824	-3.97589e-13	-0.397589
				3.38256	8.95832e-13					-6.6152	-5.57329e-13	-0.557329					6.61592	-2.5573e-13	-0.25573
				3.38488	2.6494e-12					-6.61288	7.2417e-13	0.72417					6.6136	-1.75061e-12	-1.75061
				3.3872	2.62675e-12					-6.61056	1.49545e-12	1.49545					6.61128	5.88272e-13	0.588272
				3.38952	-1.34053e-12					-6.60824	1.00908e-12	1.00908					6.60896	1.44813e-13	0.144813
				3.39184	2.36604e-13					-6.60592	2.48525e-13	0.248525					6.60664	-9.7337e-13	-0.97337
				3.39416	9.64973e-13					-6.6036	3.93961e-13	0.393961					6.60432	-6.34815e-13	-0.634815
				3.39648	5.04825e-13					-6.60128	7.01521e-13	0.701521					6.602	-1.41683e-12	-1.41683
				3.3988	-4.11894e-13					-6.59896	1.41797e-12	1.41797					6.59968	-1.0449e-12	-1.0449
				3.40112	1.12114e-12					-6.59664	-7.65946e-13	-0.765946					6.59736	-7.93002e-14	-0.0793002
				3.40344	1.32618e-12					-6.59432	4.73831e-13	0.473831					6.59504	-1.98784e-12	-1.98784
				3.40576	2.2727e-12					-6.592	1.13067e-12	1.13067					6.59272	-1.88294e-12	-1.88294
				3.40808	2.98593e-13					-6.58968	2.01759e-12	2.01759					6.5904	-1.40097e-13	-0.140097
				3.4104	-9.9602e-13					-6.58736	4.03497e-13	0.403497					6.58808	-2.22864e-12	-2.22864
				3.41272	-3.27256e-13					-6.58504	9.1169e-14	0.091169					6.58576	2.46141e-13	0.246141
				3.41504	2.0617e-12					-6.58272	5.89464e-13	0.589464					6.58344	1.88921e-13	0.188921
				3.41736	2.66251e-12					-6.5804	1.86977e-12	1.86977					6.58112	-1.06874e-12	-1.06874
				3.41968	3.06663e-12					-6.57808	2.38714e-12	2.38714					6.5788	-2.3407e-12	-2.3407
				3.422	9.459e-13					-6.57576	2.04143e-12	2.04143					6.57648	-7.07533e-13	-0.707533
				3.42432	2.44555e-12					-6.57344	2.02951e-12	2.02951					6.57416	-8.81579e-13	-0.881579
				3.42664	2.02474e-12					-6.57112	1.96752e-12	1.96752					6.57184	7.09865e-13	0.709865
				3.42896	1.07822e-12					-6.5688	-1.03142e-13	-0.103142					6.56952	-2.8533e-12	-2.8533
				3.43128	2.7698e-12					-6.56648	1.80576e-13	0.180576					6.5672	-3.19901e-12	-3.19901
				3.4336	1.44539e-12					-6.56416	1.23081e-12	1.23081					6.56488	-2.61369e-12	-2.61369
				3.43592	-3.70171e-13					-6.56184	4.86944e-13	0.486944					6.56256	-8.75618e-13	-0.875618
				3.43824	-3.26063e-13					-6.55952	1.37661e-13	0.137661					6.56024	1.86536e-13	0.186536
				3.44056	1.79384e-13					-6.5572	2.1666e-12	2.1666					6.55792	-9.78138e-13	-0.978138
				3.44288	5.77543e-13					-6.55488	2.51112e-12	2.51112					6.5556	-1.12e-12	-1.12
				3.4452	2.08673e-12					-6.55256	9.67357e-13	0.967357					6.55328	-2.36931e-12	-2.36931
				3.44752	2.87113e-12					-6.55024	6.84831e-13	0.684831					6.55096	-6.47929e-13	-0.647929
				3.44984	1.40605e-12					-6.54792	8.37419e-13	0.837419					6.54864	-2.64111e-12	-2.64111
				3.45216	8.81527e-13					-6.5456	2.11057e-12	2.11057					6.54632	-2.66257e-12	-2.66257
				3.45448	6.08537e-13					-6.54328	6.14498e-13	0.614498					6.544	-1.71485e-12	-1.71485
				3.4568	5.17938e-13					-6.54096	-4.14278e-13	-0.414278					6.54168	-8.45816e-13	-0.845816
				3.45912	-4.85804e-13					-6.53864	1.08537e-12	1.08537					6.53936	-7.20646e-13	-0.720646
				3.46144	-9.36415e-13					-6.53632	1.65996e-12	1.65996					6.53704	-4.75075e-13	-0.475075
				3.46376	3.30505e-12					-6.534	2.75073e-12	2.75073					6.53472	-1.09019e-12	-1.09019
				3.46608	2.17972e-12					-6.53168	1.85308e-12	1.85308					6.5324	-1.92228e-12	-1.92228
				3.4684	2.6649e-12					-6.52936	1.16524e-12	1.16524					6.53008	5.06017e-13	0.506017
				3.47072	1.02815e-12					-6.52704	2.83298e-12	2.83298					6.52776	-7.77867e-13	-0.777867
				3.47304	-3.36792e-13					-6.52472	1.63255e-12	1.63255					6.52544	-7.46872e-13	-0.746872
				3.47536	1.74341e-12					-6.5224	8.24306e-13	0.824306					6.52312	-1.62068e-12	-1.62068
				3.47768	1.39532e-12					-6.52008	2.33826e-12	2.33826					6.5208	-1.56786e-13	-0.156786
				3.48	2.21548e-12					-6.51776	2.076e-12	2.076					6.51848	-7.14686e-13	-0.714686
				3.48232	-5.069e-14					-6.51544	2.02236e-12	2.02236					6.51616	-2.4977e-13	-0.24977
				3.48464	-2.71227e-13					-6.51312	6.16882e-13	0.616882					6.51384	-4.01165e-13	-0.401165
				3.48696	-4.45273e-13					-6.5108	1.08776e-12	1.08776					6.51152	-1.93741e-13	-0.193741
				3.48928	1.9413e-12					-6.50848	2.57787e-12	2.57787					6.5092	-1.12238e-12	-1.12238
				3.4916	1.25823e-12					-6.50616	-9.47974e-14	-0.0947974					6.50688	-1.13549e-12	-1.13549
				3.49392	1.56221e-12					-6.50384	-1.59564e-12	-1.59564					6.50456	-1.84121e-12	-1.84121
				3.49624	2.87864e-13					-6.50152	2.48608e-12	2.48608					6.50224	-4.30968e-13	-0.430968
				3.49856	9.56628e-13					-6.4992	1.57175e-12	1.57175					6.49992	3.57006e-13	0.357006
				3.50088	-9.51912e-13					-6.49688	2.06408e-12	2.06408					6.4976	-7.81081e-14	-0.0781081
				3.5032	1.97706e-12					-6.49456	2.14872e-12	2.14872					6.49528	8.62453e-13	0.862453
				3.50552	2.55403e-12					-6.49224	1.54314e-12	1.54314					6.49296	-4.70307e-13	-0.470307
				3.50784	3.12862e-12					-6.48992	2.16303e-12	2.16303					6.49064	-5.62098e-13	-0.562098
				3.51016	2.40383e-12					-6.4876	2.25959e-12	2.25959					6.48832	-5.00109e-13	-0.500109
				3.51248	1.90911e-12					-6.48528	-2.8434e-13	-0.28434					6.486	-3.10566e-13	-0.310566
				3.5148	3.93961e-13					-6.48296	2.3788e-12	2.3788					6.48368	-1.40491e-12	-1.40491
				3.51712	1.11041e-12					-6.48064	1.62778e-12	1.62778					6.48136	-1.66359e-12	-1.66359
				3.51944	-3.92821e-13					-6.47832	2.14634e-12	2.14634					6.47904	-7.42104e-13	-0.742104
				3.52176	9.98352e-13					-6.476	2.95577e-12	2.95577					6.47672	-1.4725e-13	-0.14725
				3.52408	-3.55866e-13					-6.47368	2.14634e-12	2.14634					6.4744	5.83503e-13	0.583503
				3.5264	1.16763e-12					-6.47136	8.30267e-13	0.830267					6.47208	-1.66002e-12	-1.66002
				3.52872	3.02133e-12					-6.46904	-8.96676e-15	-0.00896676					6.46976	-2.60058e-12	-2.60058
				3.53104	3.22041e-12					-6.46672	1.24548e-13	0.124548					6.46744	-2.23103e-12	-2.23103
				3.53336	1.11041e-12					-6.4644	1.11435e-13	0.111435					6.46512	-1.51577e-12	-1.51577
				3.53568	-2.4977e-13					-6.46208	2.75943e-13	0.275943					6.4628	-3.53482e-13	-0.353482
				3.538	1.28088e-12					-6.45976	2.90689e-12	2.90689					6.46048	-8.41048e-13	-0.841048
				3.54032	1.5491e-12					-6.45744	3.11551e-12	3.11551					6.45816	-2.35262e-12	-2.35262
				3.54264	2.12369e-12					-6.45512	2.30369e-12	2.30369					6.45584	-1.37511e-12	-1.37511
				3.54496	1.24273e-12					-6.4528	1.66473e-12	1.66473					6.45352	-9.38799e-13	-0.938799
				3.54728	6.26419e-13					-6.45048	9.16097e-13	0.916097					6.4512	-8.08861e-13	-0.808861
				3.5496	9.72126e-13					-6.44816	1.22843e-12	1.22843					6.44888	-8.7681e-13	-0.87681
				3.55192	6.59797e-13					-6.44584	2.10938e-12	2.10938					6.44656	-9.35223e-13	-0.935223
				3.55424	3.26011e-13					-6.44352	1.50857e-12	1.50857					6.44424	-1.01629e-12	-1.01629
				3.55656	-3.63018e-13					-6.4412	2.17733e-12	2.17733					6.44192	-1.34173e-12	-1.34173
				3.55888	8.37419e-13					-6.43888	1.48473e-12	1.48473					6.4396	4.77407e-13	0.477407
				3.5612	8.10001e-13					-6.43656	3.87368e-12	3.87368					6.43728	-9.45952e-13	-0.945952
				3.56352	1.83162e-12					-6.43424	9.35171e-13	0.935171					6.43496	-7.81443e-13	-0.781443
				3.56584	4.11687e-12					-6.43192	2.78291e-12	2.78291					6.43264	1.29518e-12	1.29518
				3.56816	1.13067e-12					-6.4296	1.66235e-12	1.66235					6.43032	-8.97076e-13	-0.897076
				3.57048	1.78513e-12					-6.42728	9.66165e-13	0.966165					6.428	-4.26199e-13	-0.426199
				3.5728	2.81868e-12					-6.42496	2.55761e-12	2.55761					6.42568	9.12521e-13	0.912521
				3.57512	2.4539e-12					-6.42264	3.52797e-12	3.52797					6.42336	-3.32179e-12	-3.32179
				3.57744	2.4992e-12					-6.42032	1.27253e-12	1.27253					6.42104	-8.14822e-13	-0.814822
				3.57976	1.29637e-12					-6.418	1.24548e-13	0.124548					6.41872	7.94504e-13	0.794504
				3.58208	3.45287e-12					-6.41568	2.72367e-13	0.272367					6.4164	8.73182e-13	0.873182
				3.5844	4.39582e-12					-6.41336	3.24819e-13	0.324819					6.41408	9.70934e-13	0.970934
				3.58672	2.91047e-12					-6.41104	1.83401e-12	1.83401					6.41176	5.78735e-13	0.578735
				3.58904	6.39532e-13					-6.40872	3.404e-12	3.404					6.40944	-2.85532e-13	-0.285532
				3.59136	5.81119e-13					-6.4064	3.39088e-12	3.39088					6.40712	-7.46872e-13	-0.746872
				3.59368	7.56718e-14					-6.40408	1.56102e-12	1.56102					6.4048	-5.83556e-13	-0.583556
				3.596	1.36909e-12					-6.40176	6.9556e-13	0.69556					6.40248	2.95017e-13	0.295017
				3.59832	1.18074e-12					-6.39944	5.16746e-13	0.516746					6.40016	-1.42756e-12	-1.42756
				3.60064	2.14038e-12					-6.39712	1.58486e-12	1.58486					6.39784	-2.72419e-13	-0.272419
				3.60296	7.87351e-13					-6.3948	3.41711e-12	3.41711					6.39552	-9.4476e-13	-0.94476
				3.60528	-1.38226e-12					-6.39248	1.06511e-12	1.06511					6.3932	-1.66121e-12	-1.66121
				3.6076	1.97825e-12					-6.39016	1.6031e-13	0.16031					6.39088	-1.41802e-12	-1.41802
				3.60992	1.25823e-12					-6.38784	3.91576e-13	0.391576					6.38856	-1.86744e-12	-1.86744
				3.61224	-6.26471e-13					-6.38552	1.23319e-12	1.23319					6.38624	-1.63498e-12	-1.63498
				3.61456	1.81851e-12					-6.3832	1.74937e-12	1.74937					6.38392	-1.32504e-12	-1.32504
				3.61688	8.24306e-13					-6.38088	-2.58114e-13	-0.258114					6.3816	-7.38528e-13	-0.738528
				3.6192	3.76401e-12					-6.37856	2.03786e-12	2.03786					6.37928	-1.00317e-12	-1.00317
				3.62152	2.53138e-12					-6.37624	9.99544e-13	0.999544					6.37696	-2.09751e-12	-2.09751
				3.62384	6.01746e-14					-6.37392	2.11296e-12	2.11296					6.37464	-1.09103e-13	-0.109103
				3.62616	-8.60121e-13					-6.3716	8.40995e-13	0.840995					6.37232	-1.95446e-12	-1.95446
				3.62848	-1.66836e-12					-6.36928	8.30267e-13	0.830267					6.37	-5.07059e-12	-5.07059
				3.6308	1.2022e-12					-6.36696	1.25704e-12	1.25704					6.36768	-3.82605e-12	-3.82605
				3.63312	7.32515e-13					-6.36464	4.69063e-13	0.469063					6.36536	-2.66137e-12	-2.66137
				3.63544	1.60155e-12					-6.36232	1.77679e-12	1.77679					6.36304	-2.48577e-13	-0.248577
				3.63776	1.09968e-12					-6.36	1.03292e-12	1.03292					6.36072	3.95153e-13	0.395153
				3.64008	-1.00198e-12					-6.35768	1.13902e-12	1.13902					6.3584	-1.74108e-12	-1.74108
				3.6424	5.48933e-13					-6.35536	1.73745e-12	1.73745					6.35608	-3.1704e-12	-3.1704
				3.64472	1.08895e-12					-6.35304	5.28667e-13	0.528667					6.35376	-4.15626e-12	-4.15626
				3.64704	9.9716e-13					-6.35072	3.18227e-12	3.18227					6.35144	-2.77224e-12	-2.77224
				3.64936	1.08537e-12					-6.3484	6.90792e-13	0.690792					6.34912	-1.16172e-12	-1.16172
				3.65168	3.78463e-13					-6.34608	2.05574e-12	2.05574					6.3468	-1.96042e-12	-1.96042
				3.654	4.14627e-15					-6.34376	1.03292e-12	1.03292					6.34448	-1.55273e-12	-1.55273
				3.65632	1.88884e-12					-6.34144	4.28531e-13	0.428531					6.34216	-1.9795e-12	-1.9795
				3.65864	4.30999e-12					-6.33912	1.06988e-12	1.06988					6.33984	-1.66121e-12	-1.66121
				3.66096	1.10326e-12					-6.3368	3.62966e-13	0.362966					6.33752	-8.38663e-13	-0.838663
				3.66328	3.41509e-13					-6.33448	1.05474e-13	0.105474					6.3352	-1.57776e-12	-1.57776
				3.6656	4.55949e-13					-6.33216	8.16323e-14	0.0816323					6.33288	-4.95341e-13	-0.495341
				3.66792	1.31783e-12					-6.32984	1.67665e-12	1.67665					6.33056	-1.0791e-13	-0.10791
				3.67024	2.96888e-12					-6.32752	1.85666e-12	1.85666					6.32824	-8.73234e-13	-0.873234
				3.67256	7.19402e-13					-6.3252	1.23081e-12	1.23081					6.32592	-3.27649e-12	-3.27649
				3.67488	2.32277e-12					-6.32288	2.02951e-12	2.02951					6.3236	-6.97996e-13	-0.697996
				3.6772	2.17614e-12					-6.32056	1.84831e-12	1.84831					6.32128	-2.16785e-12	-2.16785
				3.67952	3.00345e-12					-6.31824	1.95322e-12	1.95322					6.31896	-2.11301e-12	-2.11301
				3.68184	1.69096e-12					-6.31592	7.56357e-13	0.756357					6.31664	-1.66717e-12	-1.66717
				3.68416	1.12352e-12					-6.3136	5.29859e-13	0.529859					6.31432	-1.4967e-12	-1.4967
				3.68648	-1.57978e-13					-6.31128	1.93891e-12	1.93891					6.312	-2.14162e-12	-2.14162
				3.6888	2.25243e-12					-6.30896	1.51572e-12	1.51572					6.30968	-3.5825e-13	-0.35825
				3.69112	5.1317e-13					-6.30664	7.55165e-13	0.755165					6.30736	9.60205e-13	0.960205
				3.69344	1.25704e-12					-6.30432	-1.17447e-13	-0.117447					6.30504	-3.84476e-13	-0.384476
				3.69576	1.70884e-12					-6.302	1.02219e-12	1.02219					6.30272	2.00842e-13	0.200842
				3.69808	1.78036e-12					-6.29968	1.36671e-12	1.36671					6.3004	-2.3252e-12	-2.3252
				3.7004	5.82311e-13					-6.29736	1.88921e-13	0.188921					6.29808	-4.90572e-13	-0.490572
				3.70272	1.052e-12					-6.29504	-5.1203e-13	-0.51203					6.29576	-1.85671e-12	-1.85671
				3.70504	1.03769e-12					-6.29272	3.87845e-12	3.87845					6.29344	1.81768e-13	0.181768
				3.70736	6.63374e-13					-6.2904	3.36466e-12	3.36466					6.29112	-1.11046e-12	-1.11046
				3.70968	2.47535e-12					-6.28808	1.47757e-12	1.47757					6.2888	-2.67329e-12	-2.67329
				3.712	1.00789e-12					-6.28576	1.07345e-12	1.07345					6.28648	-4.84529e-12	-4.84529
				3.71432	-6.02267e-14					-6.28344	-1.331e-12	-1.331					6.28416	-2.50998e-12	-2.50998
				3.71664	2.0307e-12					-6.28112	2.12965e-12	2.12965					6.28184	-2.75555e-12	-2.75555
				3.71896	2.72689e-12					-6.2788	4.3231e-12	4.3231					6.27952	-7.34951e-13	-0.734951
				3.72128	2.47333e-13					-6.27648	2.12488e-12	2.12488					6.2772	-8.39855e-13	-0.839855
				3.7236	-1.73273e-12					-6.27416	1.93772e-12	1.93772					6.27488	-8.04093e-13	-0.804093
				3.72592	3.0813e-13					-6.27184	1.02696e-12	1.02696					6.27256	-3.71876e-12	-3.71876
				3.72824	6.34763e-13					-6.26952	1.98064e-12	1.98064					6.27024	-2.40627e-12	-2.40627
				3.73056	-2.56561e-14					-6.2672	1.48353e-12	1.48353					6.26792	-1.23086e-12	-1.23086
				3.73288	1.41237e-13					-6.26488	1.52764e-12	1.52764					6.2656	9.94775e-13	0.994775
				3.7352	-8.66082e-13					-6.26256	1.72314e-12	1.72314					6.26328	-7.80251e-13	-0.780251
				3.73752	7.09865e-13					-6.26024	2.56476e-12	2.56476					6.26096	-4.22623e-13	-0.422623
				3.73984	1.68738e-12					-6.25792	7.15826e-13	0.715826					6.25864	-3.03927e-12	-3.03927
				3.74216	1.40486e-12					-6.2556	1.91746e-12	1.91746					6.25632	-1.40848e-12	-1.40848
				3.74448	-6.8846e-13					-6.25328	1.6031e-13	0.16031					6.254	2.49717e-13	0.249717
				3.7468	1.47877e-12					-6.25096	1.52526e-12	1.52526					6.25168	-2.42892e-12	-2.42892
				3.74912	9.50668e-13					-6.24864	1.47638e-12	1.47638					6.24936	-1.50504e-12	-1.50504
				3.75144	9.61397e-13					-6.24632	3.4481e-12	3.4481					6.24704	-2.07844e-12	-2.07844
				3.75376	1.63255e-12					-6.244	2.56715e-12	2.56715					6.24472	5.48933e-13	0.548933
				3.75608	6.04961e-13					-6.24168	2.04382e-12	2.04382					6.2424	-1.42756e-12	-1.42756
				3.7584	-2.12815e-13					-6.23936	3.58758e-12	3.58758					6.24008	-4.50041e-13	-0.450041
				3.76072	4.45221e-13					-6.23704	1.53479e-12	1.53479					6.23776	-1.76254e-12	-1.76254
				3.76304	4.46774e-14					-6.23472	2.18687e-12	2.18687					6.23544	-4.16663e-13	-0.416663
				3.76536	-1.40491e-12					-6.2324	8.40995e-13	0.840995					6.23312	4.27339e-13	0.427339
				3.76768	1.74579e-12					-6.23008	8.58877e-13	0.858877					6.2308	-6.19318e-13	-0.619318
				3.77	2.30489e-12					-6.22776	3.8204e-13	0.38204					6.22848	-1.18437e-12	-1.18437
				3.77232	2.41373e-13					-6.22544	-2.75996e-13	-0.275996					6.22616	-1.2094e-12	-1.2094
				3.77464	1.16203e-13					-6.22312	-1.68505e-12	-1.68505					6.22384	-1.33338e-12	-1.33338
				3.77696	1.92461e-12					-6.2208	1.07584e-12	1.07584					6.22152	-2.12612e-12	-2.12612
				3.77928	2.04418e-13					-6.21848	9.60205e-13	0.960205					6.2192	-3.05238e-12	-3.05238
				3.7816	2.73046e-12					-6.21616	1.2165e-12	1.2165					6.21688	-1.51816e-12	-1.51816
				3.78392	2.04143e-12					-6.21384	1.73387e-12	1.73387					6.21456	-1.89843e-12	-1.89843
				3.78624	2.02355e-12					-6.21152	2.32396e-12	2.32396					6.21224	-1.64929e-12	-1.64929
				3.78856	2.00805e-12					-6.2092	1.26419e-12	1.26419					6.20992	-1.089e-12	-1.089
				3.79088	2.37999e-12					-6.20688	2.23574e-12	2.23574					6.2076	-5.6925e-13	-0.56925
				3.7932	-6.05013e-13					-6.20456	2.40502e-12	2.40502					6.20528	-3.04404e-12	-3.04404
				3.79552	-1.09496e-12					-6.20224	1.66354e-12	1.66354					6.20296	-6.97635e-14	-0.0697635
				3.79784	2.75073e-12					-6.19992	2.69589e-12	2.69589					6.20064	-1.47405e-12	-1.47405
				3.80016	3.00584e-12					-6.1976	2.0009e-12	2.0009					6.19832	-1.91035e-12	-1.91035
				3.80248	2.89259e-12					-6.19528	-7.58793e-13	-0.758793					6.196	-1.76015e-12	-1.76015
				3.8048	-8.14822e-13					-6.19296	-3.78516e-13	-0.378516					6.19368	-9.72178e-13	-0.972178
				3.80712	4.83368e-13					-6.19064	-1.79436e-13	-0.179436					6.19136	-4.94979e-14	-0.0494979
				3.80944	2.57907e-12					-6.18832	1.49903e-12	1.49903					6.18904	6.76487e-13	0.676487
				3.81176	1.87573e-12					-6.186	1.54791e-12	1.54791					6.18672	1.81768e-13	0.181768
				3.81408	6.53837e-13					-6.18368	1.42751e-12	1.42751					6.1844	-2.87714e-12	-2.87714
				3.8164	1.67069e-12					-6.18136	3.37932e-13	0.337932					6.18208	-3.37901e-12	-3.37901
				3.81872	8.52086e-14					-6.17904	1.71957e-12	1.71957					6.17976	-3.17755e-12	-3.17755
				3.82104	1.52526e-12					-6.17672	9.70934e-13	0.970934					6.17744	-2.19765e-12	-2.19765
				3.82336	2.51708e-12					-6.1744	1.15928e-12	1.15928					6.17512	-7.26607e-13	-0.726607
				3.82568	2.45867e-12					-6.17208	1.61503e-13	0.161503					6.1728	-1.04609e-12	-1.04609
				3.828	1.58367e-12					-6.16976	1.42429e-13	0.142429					6.17048	-2.25928e-13	-0.225928
				3.83032	1.82447e-12					-6.16744	1.08418e-12	1.08418					6.16816	3.40316e-13	0.340316
				3.83264	4.05965e-12					-6.16512	6.56221e-13	0.656221					6.16584	-2.23222e-12	-2.23222
				3.83496	1.59201e-12					-6.1628	2.8548e-13	0.28548					6.16352	-2.91648e-12	-2.91648
				3.83728	7.2417e-13					-6.16048	8.97024e-13	0.897024					6.1612	-1.68386e-12	-1.68386
				3.8396	7.20594e-13					-6.15816	2.06647e-12	2.06647					6.15888	-5.1203e-13	-0.51203
				3.84192	1.49903e-12					-6.15584	4.64294e-13	0.464294					6.15656	8.76758e-13	0.876758
				3.84424	2.07243e-12					-6.15352	1.45254e-12	1.45254					6.15424	-1.07708e-12	-1.07708
				3.84656	-1.4725e-13					-6.1512	-1.55594e-13	-0.155594					6.15192	-1.13311e-12	-1.13311
				3.84888	8.80335e-13					-6.14888	2.12846e-12	2.12846					6.1496	-1.4216e-12	-1.4216
				3.8512	3.48387e-12					-6.14656	2.40264e-12	2.40264					6.14728	-8.44624e-13	-0.844624
				3.85352	3.162e-12					-6.14424	8.57685e-13	0.857685					6.14496	-6.78923e-13	-0.678923
				3.85584	3.19538e-12					-6.14192	-4.30968e-13	-0.430968					6.14264	-3.60634e-13	-0.360634
				3.85816	1.46684e-12					-6.1396	-8.20782e-13	-0.820782					6.14032	-1.4812e-12	-1.4812
				3.86048	3.11074e-12					-6.13728	1.01067e-14	0.0101067					6.138	-2.03791e-12	-2.03791
				3.8628	4.62351e-12					-6.13496	6.57413e-13	0.657413					6.13568	-3.16682e-12	-3.16682
				3.86512	2.75073e-12					-6.13264	2.06766e-12	2.06766					6.13336	-1.43709e-12	-1.43709
				3.86744	2.45151e-12					-6.13032	2.39548e-12	2.39548					6.13104	-1.19629e-12	-1.19629
				3.86976	2.45986e-12					-6.128	2.27628e-12	2.27628					6.12872	-5.06069e-13	-0.506069
				3.87208	2.14395e-12					-6.12568	9.81662e-13	0.981662					6.1264	-2.68522e-12	-2.68522
				3.8744	4.30641e-12					-6.12336	1.86739e-12	1.86739					6.12408	-1.82572e-12	-1.82572
				3.87672	2.41098e-12					-6.12104	-7.86211e-13	-0.786211					6.12176	-7.02765e-13	-0.702765
				3.87904	2.15587e-12					-6.11872	-1.24755e-12	-1.24755					6.11944	-3.07622e-12	-3.07622
				3.88136	1.57771e-12					-6.1164	-1.15338e-12	-1.15338					6.11712	-4.81549e-12	-4.81549
				3.88368	9.25634e-13					-6.11408	2.78328e-13	0.278328					6.1148	-4.73883e-13	-0.473883
				3.886	2.5445e-12					-6.11176	1.10087e-12	1.10087					6.11248	-2.98645e-13	-0.298645
				3.88832	1.63851e-12					-6.10944	1.25704e-12	1.25704					6.11016	-1.0449e-12	-1.0449
				3.89064	2.50635e-12					-6.10712	1.81136e-12	1.81136					6.10784	-4.91764e-13	-0.491764
				3.89296	3.66542e-13					-6.1048	1.96872e-12	1.96872					6.10552	5.65984e-14	0.0565984
				3.89528	3.09322e-13					-6.10248	2.17018e-12	2.17018					6.1032	-6.18126e-13	-0.618126
				3.8976	4.71447e-13					-6.10016	3.18859e-13	0.318859					6.10088	-1.78244e-13	-0.178244
				3.89992	1.38101e-12					-6.09784	3.29432e-12	3.29432					6.09856	6.03769e-13	0.603769
				3.90224	2.25363e-12					-6.09552	2.53854e-12	2.53854					6.09624	-4.17855e-13	-0.417855
				3.90456	1.31426e-12					-6.0932	1.07226e-12	1.07226					6.09392	-4.61962e-13	-0.461962
				3.90688	3.53429e-13					-6.09088	-1.26782e-12	-1.26782					6.0916	-1.17364e-12	-1.17364
				3.9092	2.30644e-13					-6.08856	-5.66866e-13	-0.566866					6.08928	9.63781e-13	0.963781
				3.91152	-7.27799e-13					-6.08624	1.19505e-12	1.19505					6.08696	-1.20225e-12	-1.20225
				3.91384	7.52781e-13					-6.08392	1.58009e-12	1.58009					6.08464	-3.20378e-12	-3.20378
				3.91616	-2.24736e-13					-6.0816	7.56357e-13	0.756357					6.08232	-3.47521e-13	-0.347521
				3.91848	-5.43024e-13					-6.07928	-1.52018e-13	-0.152018					6.08	-1.4204e-12	-1.4204
				3.9208	2.64582e-12					-6.07696	1.40843e-12	1.40843					6.07768	-1.04728e-12	-1.04728
				3.92312	-1.0791e-13					-6.07464	6.91984e-13	0.691984					6.07536	-2.37766e-12	-2.37766
				3.92544	1.24631e-12					-6.07232	2.00448e-12	2.00448					6.07304	-1.69339e-12	-1.69339
				3.92776	4.89328e-13					-6.07	8.54108e-13	0.854108					6.07072	-1.20464e-12	-1.20464
				3.93008	4.46413e-13					-6.06768	4.80983e-13	0.480983					6.0684	-1.64571e-12	-1.64571
				3.9324	2.72367e-13					-6.06536	9.49476e-13	0.949476					6.06608	-1.89009e-12	-1.89009
				3.93472	3.08571e-12					-6.06304	5.07209e-13	0.507209					6.06376	-1.86506e-12	-1.86506
				3.93704	3.27525e-12					-6.06072	1.685e-12	1.685					6.06144	-1.82452e-12	-1.82452
				3.93936	1.8197e-12					-6.0584	2.04501e-12	2.04501					6.05912	-3.11079e-12	-3.11079
				3.94168	2.29654e-12					-6.05608	-1.50147e-12	-1.50147					6.0568	-2.78774e-12	-2.78774
				3.944	1.89481e-12					-6.05376	9.53052e-13	0.953052					6.05448	-2.13089e-12	-2.13089
				3.94632	3.23114e-12					-6.05144	2.29654e-12	2.29654					6.05216	-1.15695e-12	-1.15695
				3.94864	1.04007e-12					-6.04912	3.64003e-12	3.64003					6.04984	4.70255e-13	0.470255
				3.95096	-1.17447e-13					-6.0468	7.87351e-13	0.787351					6.04752	-5.45409e-13	-0.545409
				3.95328	1.87729e-13					-6.04448	1.35121e-12	1.35121					6.0452	-3.01066e-12	-3.01066
				3.9556	3.15644e-14					-6.04216	6.52645e-13	0.652645					6.04288	-2.10228e-12	-2.10228
				3.95792	1.97944e-12					-6.03984	-4.84612e-13	-0.484612					6.04056	-1.62068e-12	-1.62068
				3.96024	3.18584e-12					-6.03752	1.23677e-12	1.23677					6.03824	-1.62664e-12	-1.62664
				3.96256	1.79229e-12					-6.0352	2.38833e-12	2.38833					6.03592	-4.59578e-13	-0.459578
				3.96488	1.98302e-12					-6.03288	9.12521e-13	0.912521					6.0336	8.91063e-13	0.891063
				3.9672	1.95799e-12					-6.03056	-3.40369e-13	-0.340369					6.03128	4.76215e-13	0.476215
				3.96952	2.43244e-12					-6.02824	4.6191e-13	0.46191					6.02896	-1.08423e-12	-1.08423
				3.97184	6.58605e-13					-6.02592	-1.57538e-12	-1.57538					6.02664	-3.15371e-12	-3.15371
				3.97416	2.06647e-12					-6.0236	1.19505e-12	1.19505					6.02432	-1.37351e-14	-0.0137351
				3.97648	1.30472e-12					-6.02128	6.03769e-13	0.603769					6.022	-8.935e-13	-0.8935
				3.9788	1.87096e-12					-6.01896	2.17531e-13	0.217531					6.01968	2.02034e-13	0.202034
				3.98112	6.93176e-13					-6.01664	1.59201e-12	1.59201					6.01736	-1.3e-12	-1.3
				3.98344	2.10461e-12					-6.01432	1.41201e-12	1.41201					6.01504	-4.39312e-13	-0.439312
				3.98576	8.18346e-13					-6.012	2.52102e-13	0.252102					6.01272	-2.05221e-12	-2.05221
				3.98808	6.7291e-13					-6.00968	1.74103e-12	1.74103					6.0104	-1.40133e-12	-1.40133
				3.9904	2.48966e-12					-6.00736	6.64566e-13	0.664566					6.00808	6.37509e-14	0.0637509
				3.99272	4.11091e-12					-6.00504	-4.10702e-13	-0.410702					6.00576	6.896e-13	0.6896
				3.99504	6.59797e-13					-6.00272	2.48525e-13	0.248525					6.00344	-1.01867e-12	-1.01867
				3.99736	6.03769e-13					-6.0004	3.78463e-13	0.378463					6.00112	-7.48064e-13	-0.748064
				3.99968	1.73507e-12					-5.99808	2.09031e-12	2.09031					5.9988	-1.36676e-12	-1.36676
				4.002	-9.03036e-13					-5.99576	1.05915e-12	1.05915					5.99648	-3.3051e-12	-3.3051
				4.00432	4.59526e-13					-5.99344	1.49903e-12	1.49903					5.99416	-1.41564e-12	-1.41564
				4.00664	6.75295e-13					-5.99112	1.57926e-13	0.157926					5.99184	-1.37153e-12	-1.37153
				4.00896	5.54893e-13					-5.9888	-1.71091e-13	-0.171091					5.98952	-2.0546e-12	-2.0546
				4.01128	-1.83012e-13					-5.98648	1.56734e-13	0.156734					5.9872	-2.36335e-12	-2.36335
				4.0136	7.26555e-13					-5.98416	8.01656e-13	0.801656					5.98488	-8.33895e-13	-0.833895
				4.01592	-4.54809e-13					-5.98184	2.38833e-12	2.38833					5.98256	-4.23815e-13	-0.423815
				4.01824	7.37283e-13					-5.97952	2.39906e-12	2.39906					5.98024	-2.0844e-12	-2.0844
				4.02056	1.263e-12					-5.9772	1.32618e-12	1.32618					5.97792	-2.0236e-12	-2.0236
				4.02288	6.45492e-13					-5.97488	8.00464e-13	0.800464					5.9756	-2.05817e-12	-2.05817
				4.0252	1.6242e-12					-5.97256	-1.21023e-13	-0.121023					5.97328	-7.1707e-13	-0.71707
				4.02752	2.41217e-12					-5.97024	8.89871e-13	0.889871					5.97096	-1.04728e-12	-1.04728
				4.02984	2.29773e-12					-5.96792	1.92222e-12	1.92222					5.96864	-1.87578e-12	-1.87578
				4.03216	3.73897e-12					-5.9656	1.83401e-12	1.83401					5.96632	-8.82771e-13	-0.882771
				4.03448	1.865e-12					-5.96328	1.73626e-12	1.73626					5.964	-1.28808e-12	-1.28808
				4.0368	3.70679e-12					-5.96096	1.06988e-12	1.06988					5.96168	-1.53604e-12	-1.53604
				4.03912	2.95338e-12					-5.95864	1.36552e-12	1.36552					5.95936	-2.35739e-12	-2.35739
				4.04144	1.41201e-12					-5.95632	-9.43568e-13	-0.943568					5.95704	-1.75538e-12	-1.75538
				4.04376	-8.21974e-13					-5.954	6.08537e-13	0.608537					5.95472	-7.56409e-13	-0.756409
				4.04608	-3.00629e-15					-5.95168	6.40724e-13	0.640724					5.9524	2.32198e-14	0.0232198
				4.0484	-9.2807e-13					-5.94936	1.57294e-12	1.57294					5.95008	-7.86211e-13	-0.786211
				4.05072	4.26147e-13					-5.94704	3.5939e-13	0.35939					5.94776	-1.65131e-13	-0.165131
				4.05304	2.88424e-12					-5.94472	-3.57058e-13	-0.357058					5.94544	-2.11897e-12	-2.11897
				4.05536	2.37403e-12					-5.9424	4.80983e-13	0.480983					5.94312	-2.15473e-12	-2.15473
				4.05768	3.11432e-12					-5.94008	2.27151e-12	2.27151					5.9408	-5.41832e-13	-0.541832
				4.06	2.46224e-12					-5.93776	1.81613e-12	1.81613					5.93848	-1.42637e-12	-1.42637
				4.06232	6.60989e-13					-5.93544	2.48132e-12	2.48132					5.93616	-2.44203e-12	-2.44203
				4.06464	-4.19838e-15					-5.93312	3.24545e-12	3.24545					5.93384	-3.41835e-12	-3.41835
				4.06696	1.0961e-12					-5.9308	1.34406e-12	1.34406					5.93152	1.53158e-13	0.153158
				4.06928	2.83775e-12					-5.92848	1.54075e-12	1.54075					5.9292	-2.42617e-13	-0.242617
				4.0716	6.93176e-13					-5.92616	2.63986e-12	2.63986					5.92688	-3.02222e-13	-0.302222
				4.07392	-2.68481e-14					-5.92384	2.99988e-12	2.99988					5.92456	-1.66323e-13	-0.166323
				4.07624	-4.33352e-13					-5.92152	2.78053e-12	2.78053					5.92224	-3.16165e-14	-0.0316165
				4.07856	1.09491e-12					-5.9192	1.75808e-13	0.175808					5.91992	-3.28448e-13	-0.328448
				4.08088	-5.96669e-13					-5.91688	1.02935e-12	1.02935					5.9176	-1.73989e-12	-1.73989
				4.0832	6.26419e-13					-5.91456	3.07736e-12	3.07736					5.91528	-3.04244e-14	-0.0304244
				4.08552	2.20952e-12					-5.91224	4.41012e-12	4.41012					5.91296	-2.53144e-12	-2.53144
				4.08784	2.09269e-12					-5.90992	2.31919e-12	2.31919					5.91064	-3.18232e-12	-3.18232
				4.09016	7.13442e-13					-5.9076	-4.96533e-13	-0.496533					5.90832	-7.7429e-13	-0.77429
				4.09248	3.66983e-12					-5.90528	5.32243e-13	0.532243					5.906	-1.2857e-12	-1.2857
				4.0948	1.88765e-12					-5.90296	2.15111e-12	2.15111					5.90368	-6.12166e-13	-0.612166
				4.09712	5.22707e-13					-5.90064	2.33469e-12	2.33469					5.90136	-1.84241e-12	-1.84241
				4.09944	1.42989e-12					-5.89832	-8.78002e-13	-0.878002					5.89904	-1.31192e-12	-1.31192
				4.10176	-8.60121e-13					-5.896	4.40452e-13	0.440452					5.89672	-2.7838e-13	-0.27838
				4.10408	1.52645e-12					-5.89368	-5.42663e-14	-0.0542663					5.8944	-1.13311e-12	-1.13311
				4.1064	1.15928e-12					-5.89136	8.05233e-13	0.805233					5.89208	-1.48955e-12	-1.48955
				4.10872	1.35479e-12					-5.88904	3.00226e-12	3.00226					5.88976	-5.97861e-13	-0.597861
				4.11104	1.99136e-12					-5.88672	1.19266e-12	1.19266					5.88744	-2.20719e-12	-2.20719
				4.11336	7.81391e-13					-5.8844	1.64685e-12	1.64685					5.88512	-3.16086e-12	-3.16086
				4.11568	3.31697e-12					-5.88208	3.53429e-13	0.353429					5.8828	-2.96178e-12	-2.96178
				4.118	2.97365e-12					-5.87976	2.75788e-12	2.75788					5.88048	-3.86896e-12	-3.86896
				4.12032	2.49562e-12					-5.87744	3.89871e-12	3.89871					5.87816	-1.4204e-12	-1.4204
				4.12264	4.43754e-12					-5.87512	2.78291e-12	2.78291					5.87584	-1.53842e-12	-1.53842
				4.12496	1.06749e-12					-5.8728	2.79007e-12	2.79007					5.87352	-1.12953e-12	-1.12953
				4.12728	1.15094e-12					-5.87048	1.08776e-12	1.08776					5.8712	-2.30732e-12	-2.30732
				4.1296	1.90553e-12					-5.86816	9.24442e-13	0.924442					5.86888	-2.14162e-12	-2.14162
				4.13192	2.31204e-12					-5.86584	1.42035e-12	1.42035					5.86656	-1.50624e-12	-1.50624
				4.13424	1.28445e-12					-5.86352	2.41575e-12	2.41575					5.86424	-1.11046e-12	-1.11046
				4.13656	2.60887e-12					-5.8612	2.48847e-12	2.48847					5.86192	-3.36792e-13	-0.336792
				4.13888	8.19538e-13					-5.85888	2.37045e-12	2.37045					5.8596	-2.57554e-12	-2.57554
				4.1412	1.27849e-12					-5.85656	1.76725e-12	1.76725					5.85728	-2.57673e-12	-2.57673
				4.14352	1.97706e-12					-5.85424	2.89736e-12	2.89736					5.85496	-2.01645e-12	-2.01645
				4.14584	1.83162e-12					-5.85192	2.2572e-12	2.2572					5.85264	-8.05285e-13	-0.805285
				4.14816	2.27985e-12					-5.8496	8.86295e-13	0.886295					5.85032	-1.25232e-12	-1.25232
				4.15048	2.14991e-12					-5.84728	2.52542e-12	2.52542					5.848	-2.05102e-12	-2.05102
				4.1528	9.55436e-13					-5.84496	1.5336e-12	1.5336					5.84568	-1.70889e-12	-1.70889
				4.15512	2.43482e-12					-5.84264	8.97024e-13	0.897024					5.84336	-1.83287e-12	-1.83287
				4.15744	9.61397e-13					-5.84032	7.9808e-13	0.79808					5.84104	-2.26917e-12	-2.26917
				4.15976	2.95696e-12					-5.838	3.27525e-12	3.27525					5.83872	-1.63975e-12	-1.63975
				4.16208	8.10001e-13					-5.83568	4.79755e-12	4.79755					5.8364	4.85752e-13	0.485752
				4.1644	6.60989e-13					-5.83336	1.96275e-12	1.96275					5.83408	-1.82452e-12	-1.82452
				4.16672	-3.7577e-14					-5.83104	1.03292e-12	1.03292					5.83176	-1.85909e-12	-1.85909
				4.16904	1.91388e-12					-5.82872	9.49476e-13	0.949476					5.82944	-5.29911e-13	-0.529911
				4.17136	1.46208e-12					-5.8264	2.31442e-12	2.31442					5.82712	-1.62068e-12	-1.62068
				4.17368	6.07345e-13					-5.82408	5.32243e-13	0.532243					5.8248	-4.33352e-13	-0.433352
				4.176	1.13306e-12					-5.82176	1.89004e-12	1.89004					5.82248	-8.50584e-13	-0.850584
				4.17832	1.72314e-12					-5.81944	2.9355e-12	2.9355					5.82016	2.43757e-13	0.243757
				4.18064	1.17955e-12					-5.81712	1.10564e-12	1.10564					5.81784	8.24306e-13	0.824306
				4.18296	2.97842e-12					-5.8148	2.1666e-12	2.1666					5.81552	9.90007e-13	0.990007
				4.18528	2.51589e-12					-5.81248	1.23796e-12	1.23796					5.8132	-2.04268e-12	-2.04268
				4.1876	1.44181e-12					-5.81016	4.14627e-15	0.00414627					5.81088	-2.98324e-12	-2.98324
				4.18992	1.68655e-13					-5.80784	-4.20239e-13	-0.420239					5.80856	-3.28961e-12	-3.28961
				4.19224	5.4178e-13					-5.80552	4.70616e-14	0.0470616					5.80624	-1.47405e-12	-1.47405
				4.19456	8.40165e-14					-5.8032	-8.35087e-13	-0.835087					5.80392	1.08537e-12	1.08537
				4.19688	1.67665e-12					-5.80088	2.20833e-12	2.20833					5.8016	1.88921e-13	0.188921
				4.1992	1.0067e-12					-5.79856	2.09269e-12	2.09269					5.79928	8.13577e-13	0.813577
				4.20152	1.38817e-12					-5.79624	8.18346e-13	0.818346					5.79696	-1.5563e-12	-1.5563
				4.20384	1.95799e-12					-5.79392	5.57277e-13	0.557277					5.79464	-2.19169e-12	-2.19169
				4.20616	9.59013e-13					-5.7916	5.84695e-13	0.584695					5.79232	-7.56409e-13	-0.756409
				4.20848	1.39055e-12					-5.78928	2.01998e-12	2.01998					5.79	-1.30477e-12	-1.30477
				4.2108	2.44118e-14					-5.78696	8.70798e-13	0.870798					5.78768	-8.50584e-13	-0.850584
				4.21312	1.32379e-12					-5.78464	-2.83148e-13	-0.283148					5.78536	-4.41696e-13	-0.441696
				4.21544	1.75891e-12					-5.78232	-8.76449e-14	-0.0876449					5.78304	-8.47008e-13	-0.847008
				4.21776	1.37982e-12					-5.78	1.07941e-12	1.07941					5.78072	-1.02821e-12	-1.02821
				4.22008	2.20952e-12					-5.77768	1.19982e-12	1.19982					5.7784	-1.90797e-12	-1.90797
				4.2224	3.43893e-13					-5.77536	1.42751e-12	1.42751					5.77608	-6.36008e-13	-0.636008
				4.22472	8.23114e-13					-5.77304	2.01759e-12	2.01759					5.77376	-1.00913e-12	-1.00913
				4.22704	8.24306e-13					-5.77072	2.19402e-12	2.19402					5.77144	-1.58849e-12	-1.58849
				4.22936	1.50774e-13					-5.7684	2.09508e-12	2.09508					5.76912	-1.8436e-12	-1.8436
				4.23168	1.06272e-12					-5.76608	2.78649e-12	2.78649					5.7668	-5.45409e-13	-0.545409
				4.234	-2.79572e-13					-5.76376	1.96872e-12	1.96872					5.76448	-2.68843e-13	-0.268843
				4.23632	1.29876e-12					-5.76144	3.04279e-12	3.04279					5.76216	-2.11182e-12	-2.11182
				4.23864	6.37509e-14					-5.75912	3.20372e-12	3.20372					5.75984	-1.52889e-12	-1.52889
				4.24096	3.66542e-13					-5.7568	1.89957e-12	1.89957					5.75752	-8.95884e-13	-0.895884
				4.24328	1.79384e-13					-5.75448	-1.84204e-13	-0.184204					5.7552	-4.41256e-12	-4.41256
				4.2456	-2.34272e-13					-5.75216	1.3524e-12	1.3524					5.75288	-3.90234e-12	-3.90234
				4.24792	1.70645e-12					-5.74984	1.78156e-12	1.78156					5.75056	-9.10189e-13	-0.910189
				4.25024	6.35955e-13					-5.74752	1.09491e-12	1.09491					5.74824	-3.70171e-13	-0.370171
				4.25256	-2.41425e-13					-5.7452	1.41201e-12	1.41201					5.74592	-2.02599e-12	-2.02599
				4.25488	1.98302e-12					-5.74288	2.0772e-12	2.0772					5.7436	-1.331e-12	-1.331
				4.2572	2.62079e-12					-5.74056	2.5433e-12	2.5433					5.74128	-3.24431e-12	-3.24431
				4.25952	2.94385e-12					-5.73824	2.2274e-12	2.2274					5.73896	-2.25368e-12	-2.25368
				4.26184	2.82225e-12					-5.73592	2.81272e-12	2.81272					5.73664	-1.78638e-12	-1.78638
				4.26416	1.55148e-12					-5.7336	2.05693e-12	2.05693					5.73432	-2.26679e-12	-2.26679
				4.26648	8.88679e-13					-5.73128	3.04398e-12	3.04398					5.732	-9.74562e-13	-0.974562
				4.2688	1.59678e-12					-5.72896	1.50618e-12	1.50618					5.72968	-1.32504e-12	-1.32504
				4.27112	2.26555e-12					-5.72664	1.10922e-12	1.10922					5.72736	-3.15848e-12	-3.15848
				4.27344	2.71854e-12					-5.72432	1.4132e-12	1.4132					5.72504	-2.88668e-12	-2.88668
				4.27576	2.84252e-12					-5.722	1.93772e-12	1.93772					5.72272	-2.33116e-12	-2.33116
				4.27808	2.41098e-12					-5.71968	1.32892e-13	0.132892					5.7204	-2.46349e-12	-2.46349
				4.2804	3.45406e-12					-5.71736	1.92222e-12	1.92222					5.71808	-3.7724e-12	-3.7724
				4.28272	1.39055e-12					-5.71504	1.28922e-12	1.28922					5.71576	-1.78757e-12	-1.78757
				4.28504	1.50141e-12					-5.71272	4.55949e-13	0.455949					5.71344	-6.4316e-13	-0.64316
				4.28736	6.00193e-13					-5.7104	-1.22216e-13	-0.122216					5.71112	-2.17858e-12	-2.17858
				4.28968	1.69811e-12					-5.70808	1.96073e-13	0.196073					5.7088	-2.11897e-12	-2.11897
				4.292	-2.29504e-13					-5.70576	2.31681e-12	2.31681					5.70648	-2.01884e-12	-2.01884
				4.29432	-9.59895e-14					-5.70344	4.8456e-13	0.48456					5.70416	-1.75657e-12	-1.75657
				4.29664	9.2325e-13					-5.70112	1.0309e-13	0.10309					5.70184	-3.0488e-12	-3.0488
				4.29896	2.93825e-13					-5.6988	1.78633e-12	1.78633					5.69952	-3.9834e-12	-3.9834
				4.30128	-1.24874e-12					-5.69648	2.30965e-12	2.30965					5.6972	-1.32742e-12	-1.32742
				4.3036	4.49989e-13					-5.69416	1.12591e-12	1.12591					5.69488	-1.49272e-14	-0.0149272
				4.30592	2.47178e-12					-5.69184	1.96752e-12	1.96752					5.69256	-4.8342e-13	-0.48342
				4.30824	1.38578e-12					-5.68952	2.30644e-13	0.230644					5.69024	-1.34173e-12	-1.34173
				4.31056	1.54791e-12					-5.6872	1.84474e-12	1.84474					5.68792	-2.27156e-12	-2.27156
				4.31288	-6.85714e-14					-5.68488	-6.1455e-13	-0.61455					5.6856	1.75808e-13	0.175808
				4.3152	8.21922e-13					-5.68256	9.30402e-13	0.930402					5.68328	-1.44901e-12	-1.44901
				4.31752	1.83639e-12					-5.68024	4.48797e-13	0.448797					5.68096	-7.86211e-13	-0.786211
				4.31984	-1.40014e-12					-5.67792	1.44062e-12	1.44062					5.67864	-3.1295e-13	-0.31295
				4.32216	-1.0592e-12					-5.6756	1.11995e-12	1.11995					5.67632	-3.5825e-13	-0.35825
				4.32448	1.41678e-12					-5.67328	-5.31103e-13	-0.531103					5.674	-1.18675e-12	-1.18675
				4.3268	8.28244e-14					-5.67096	5.72775e-13	0.572775					5.67168	-5.93092e-13	-0.593092
				4.32912	-1.37749e-12					-5.66864	1.99494e-12	1.99494					5.66936	-7.83827e-13	-0.783827
				4.33144	2.65215e-13					-5.66632	7.33707e-13	0.733707					5.66704	-9.7337e-13	-0.97337
				4.33376	-3.23679e-13					-5.664	1.92103e-12	1.92103					5.66472	6.46684e-13	0.646684
				4.33608	2.04418e-13					-5.66168	2.78053e-12	2.78053					5.6624	-1.8126e-12	-1.8126
				4.3384	7.19402e-13					-5.65936	1.74937e-12	1.74937					5.66008	-1.39418e-12	-1.39418
				4.34072	2.34542e-12					-5.65704	1.21174e-12	1.21174					5.65776	1.32892e-13	0.132892
				4.34304	1.65519e-12					-5.65472	2.09985e-12	2.09985					5.65544	-9.94828e-13	-0.994828
				4.34536	1.60274e-12					-5.6524	2.03547e-12	2.03547					5.65312	-2.10824e-12	-2.10824
				4.34768	1.66116e-12					-5.65008	1.27849e-12	1.27849					5.6508	-2.25129e-12	-2.25129
				4.35	9.26826e-13					-5.64776	3.02968e-12	3.02968					5.64848	-8.07669e-13	-0.807669
				4.35232	6.31187e-13					-5.64544	5.25091e-13	0.525091					5.64616	-2.80323e-12	-2.80323
				4.35464	2.05574e-12					-5.64312	4.60718e-13	0.460718					5.64384	-4.77734e-12	-4.77734
				4.35696	3.86653e-12					-5.6408	-1.25709e-12	-1.25709					5.64152	-5.02649e-12	-5.02649
				4.35928	1.06272e-12					-5.63848	9.02984e-13	0.902984					5.6392	-2.38242e-12	-2.38242
				4.3616	1.49582e-13					-5.63616	-1.49272e-14	-0.0149272					5.63688	-1.20344e-12	-1.20344
				4.36392	6.04961e-13					-5.63384	4.15418e-13	0.415418					5.63456	-1.63141e-12	-1.63141
				4.36624	5.10786e-13					-5.63152	1.03888e-12	1.03888					5.63224	-8.52969e-13	-0.852969
				4.36856	2.69112e-12					-5.6292	5.14362e-13	0.514362					5.62992	-4.42209e-12	-4.42209
				4.37088	1.07465e-12					-5.62688	1.16203e-13	0.116203					5.6276	-1.33577e-12	-1.33577
				4.3732	-8.12437e-13					-5.62456	2.86875e-12	2.86875					5.62528	-1.59087e-12	-1.59087
				4.37552	3.60582e-13					-5.62224	2.06766e-12	2.06766					5.62296	-2.2712e-13	-0.22712
				4.37784	1.31068e-12					-5.61992	1.56221e-12	1.56221					5.62064	-2.51832e-12	-2.51832
				4.38016	2.7952e-13					-5.6176	2.66013e-12	2.66013					5.61832	-2.24772e-12	-2.24772
				4.38248	-8.62505e-13					-5.61528	3.50294e-12	3.50294					5.616	-1.59683e-12	-1.59683
				4.3848	-6.8846e-13					-5.61296	3.10478e-12	3.10478					5.61368	1.39055e-12	1.39055
				4.38712	9.57821e-13					-5.61064	1.19624e-12	1.19624					5.61136	-9.57873e-13	-0.957873
				4.38944	4.49989e-13					-5.60832	2.79722e-12	2.79722					5.60904	-2.839e-12	-2.839
				4.39176	6.19266e-13					-5.606	1.89957e-12	1.89957					5.60672	-1.61948e-12	-1.61948
				4.39408	-1.48442e-13					-5.60368	1.95083e-12	1.95083					5.6044	-6.89652e-13	-0.689652
				4.3964	2.09746e-12					-5.60136	2.34303e-12	2.34303					5.60208	-4.79843e-13	-0.479843
				4.39872	1.82447e-12					-5.59904	1.6397e-12	1.6397					5.59976	6.73272e-14	0.0673272
				4.40104	7.9808e-13					-5.59672	1.75891e-12	1.75891					5.59744	-2.77188e-13	-0.277188
				4.40336	-1.5917e-13					-5.5944	1.29995e-12	1.29995					5.59512	1.38853e-13	0.138853
				4.40568	2.2119e-12					-5.59208	-4.94149e-13	-0.494149					5.5928	-4.81036e-13	-0.481036
				4.408	3.0571e-12					-5.58976	1.82686e-12	1.82686					5.59048	-9.07805e-13	-0.907805
				4.41032	1.59678e-12					-5.58744	2.56834e-12	2.56834					5.58816	-2.7838e-13	-0.27838
				4.41264	1.76964e-12					-5.58512	3.36942e-12	3.36942					5.58584	-1.66002e-12	-1.66002
				4.41496	2.14634e-12					-5.5828	1.44181e-12	1.44181					5.58352	-2.09036e-12	-2.09036
				4.41728	1.67308e-12					-5.58048	5.06017e-13	0.506017					5.5812	-2.39315e-12	-2.39315
				4.4196	1.12471e-12					-5.57816	2.02951e-12	2.02951					5.57888	-2.18215e-12	-2.18215
				4.42192	6.08537e-13					-5.57584	1.98064e-12	1.98064					5.57656	-9.61449e-13	-0.961449
				4.42424	5.40588e-13					-5.57352	5.68006e-13	0.568006					5.57424	-8.95884e-13	-0.895884
				4.42656	-3.74939e-13					-5.5712	8.56493e-13	0.856493					5.57192	-1.65167e-12	-1.65167
				4.42888	1.0973e-12					-5.56888	6.31187e-13	0.631187					5.5696	-1.59564e-12	-1.59564
				4.4312	1.11637e-12					-5.56656	1.48751e-14	0.0148751					5.56728	-5.66866e-13	-0.566866
				4.43352	1.16167e-12					-5.56424	1.49582e-13	0.149582					5.56496	-2.11063e-12	-2.11063
				4.43584	-2.66459e-13					-5.56192	1.18789e-12	1.18789					5.56264	-8.17206e-13	-0.817206
				4.43816	2.07243e-12					-5.5596	-4.56002e-13	-0.456002					5.56032	-6.33623e-13	-0.633623
				4.44048	1.04604e-12					-5.55728	1.55542e-13	0.155542					5.558	-2.68843e-13	-0.268843
				4.4428	8.60069e-13					-5.55496	2.11177e-12	2.11177					5.55568	-2.21434e-12	-2.21434
				4.44512	2.00686e-12					-5.55264	3.17392e-12	3.17392					5.55336	-1.2106e-12	-1.2106
				4.44744	2.40979e-12					-5.55032	1.26538e-12	1.26538					5.55104	2.50909e-13	0.250909
				4.44976	1.69847e-13					-5.548	8.21922e-13	0.821922					5.54872	-2.36097e-12	-2.36097
				4.45208	-4.76267e-13					-5.54568	2.076e-12	2.076					5.5464	-2.62084e-12	-2.62084
				4.4544	2.58062e-13					-5.54336	2.37641e-12	2.37641					5.54408	-3.27888e-12	-3.27888
				4.45672	-8.96676e-15					-5.54104	3.20051e-13	0.320051					5.54176	-2.0689e-12	-2.0689
				4.45904	-5.35872e-13					-5.53872	-2.11623e-13	-0.211623					5.53944	-2.51236e-12	-2.51236
				4.46136	2.97961e-12					-5.5364	1.55267e-12	1.55267					5.53712	-3.00827e-12	-3.00827
				4.46368	-1.93741e-13					-5.53408	2.71139e-12	2.71139					5.5348	-3.261e-12	-3.261
				4.466	-7.27799e-13					-5.53176	2.4682e-12	2.4682					5.53248	-2.69475e-12	-2.69475
				4.46832	-5.54945e-13					-5.52944	3.89395e-12	3.89395					5.53016	8.36227e-13	0.836227
				4.47064	-5.62098e-13					-5.52712	2.55522e-12	2.55522					5.52784	-1.28331e-12	-1.28331
				4.47296	2.71497e-12					-5.5248	1.64804e-12	1.64804					5.52552	-2.37849e-13	-0.237849
				4.47528	1.99136e-12					-5.52248	1.89957e-12	1.89957					5.5232	-2.4015e-12	-2.4015
				4.4776	1.58486e-12					-5.52016	1.46088e-12	1.46088					5.52088	-1.29762e-12	-1.29762
				4.47992	-1.13788e-12					-5.51784	1.44419e-12	1.44419					5.51856	-2.61846e-12	-2.61846
				4.48224	-4.3812e-13					-5.51552	3.22435e-13	0.322435					5.51624	-2.31209e-12	-2.31209
				4.48456	-8.44624e-13					-5.5132	1.3071e-12	1.3071					5.51392	-5.4064e-13	-0.54064
				4.48688	-1.68707e-13					-5.51088	2.69828e-12	2.69828					5.5116	-5.37064e-13	-0.537064
				4.4892	1.39293e-12					-5.50856	1.99613e-12	1.99613					5.50928	-3.12867e-12	-3.12867
				4.49152	1.46088e-12					-5.50624	-8.58929e-13	-0.858929					5.50696	-2.74005e-12	-2.74005
				4.49384	7.73046e-13					-5.50392	7.20956e-14	0.0720956					5.50464	-9.51912e-13	-0.951912
				4.49616	1.50738e-12					-5.5016	3.31972e-13	0.331972					5.50232	-2.41425e-13	-0.241425
				4.49848	2.24683e-13					-5.49928	2.32396e-12	2.32396					5.5	-1.4204e-12	-1.4204
				4.5008	1.50976e-12					-5.49696	1.37744e-12	1.37744					5.49768	-1.81618e-12	-1.81618
				4.50312	8.15962e-13					-5.49464	1.72553e-12	1.72553					5.49536	-1.86982e-12	-1.86982
				4.50544	1.50976e-12					-5.49232	4.89328e-13	0.489328					5.49304	-3.23358e-12	-3.23358
				4.50776	2.79881e-14					-5.49	-2.03278e-13	-0.203278					5.49072	-3.0699e-13	-0.30699
				4.51008	1.443e-12					-5.48768	3.72467e-12	3.72467					5.4884	-1.35722e-12	-1.35722
				4.5124	1.59118e-13					-5.48536	7.72254e-15	0.00772254					5.48608	-2.04864e-12	-2.04864
				4.51472	7.89735e-13					-5.48304	3.02169e-13	0.302169					5.48376	-2.11778e-12	-2.11778
				4.51704	1.99494e-12					-5.48072	1.83758e-12	1.83758					5.48144	2.80712e-13	0.280712
				4.51936	1.865e-12					-5.4784	6.87215e-13	0.687215					5.47912	-5.23951e-13	-0.523951
				4.52168	-7.33398e-14					-5.47608	2.7952e-13	0.27952					5.4768	1.55542e-13	0.155542
				4.524	-3.65403e-13					-5.47376	2.79245e-12	2.79245					5.47448	-9.29262e-13	-0.929262
				4.52632	1.61109e-12					-5.47144	1.68857e-12	1.68857					5.47216	-3.74939e-13	-0.374939
				4.52864	2.31085e-12					-5.46912	6.26419e-13	0.626419					5.46984	-9.24494e-13	-0.924494
				4.53096	2.12607e-12					-5.4668	1.10802e-12	1.10802					5.46752	-3.39332e-12	-3.39332
				4.53328	2.63867e-12					-5.46448	2.6351e-12	2.6351					5.4652	-2.98681e-12	-2.98681
				4.5356	4.28531e-13					-5.46216	1.58725e-12	1.58725					5.46288	-2.71979e-12	-2.71979
				4.53792	7.84967e-13					-5.45984	3.18942e-12	3.18942					5.46056	-5.51369e-13	-0.551369
				4.54024	1.15332e-12					-5.45752	1.21889e-12	1.21889					5.45824	-4.03549e-13	-0.403549
				4.54256	5.31051e-13					-5.4552	1.71242e-12	1.71242					5.45592	-3.56021e-12	-3.56021
				4.54488	1.86381e-12					-5.45288	5.52509e-13	0.552509					5.4536	-1.72796e-12	-1.72796
				4.5472	1.06749e-12					-5.45056	-1.92824e-12	-1.92824					5.45128	-2.63515e-12	-2.63515
				4.54952	1.65758e-12					-5.44824	6.75295e-13	0.675295					5.44896	-7.55217e-13	-0.755217
				4.55184	1.18193e-12					-5.44592	-1.9851e-13	-0.19851					5.44664	-2.17262e-12	-2.17262
				4.55416	4.38068e-13					-5.4436	6.19266e-13	0.619266					5.44432	-2.0248e-12	-2.0248
				4.55648	-7.50449e-13					-5.44128	4.42836e-13	0.442836					5.442	-6.03821e-13	-0.603821
				4.5588	-7.55217e-13					-5.43896	1.49903e-12	1.49903					5.43968	9.23611e-14	0.0923611
				4.56112	-2.67651e-13					-5.43664	2.5898e-12	2.5898					5.43736	-1.09019e-12	-1.09019
				4.56344	3.29588e-13					-5.43432	1.47042e-12	1.47042					5.43504	-1.01986e-12	-1.01986
				4.56576	2.26912e-12					-5.432	9.61397e-13	0.961397					5.43272	-2.42176e-12	-2.42176
				4.56808	2.94385e-12					-5.42968	1.08299e-12	1.08299					5.4304	-1.88174e-12	-1.88174
				4.5704	2.0772e-12					-5.42736	1.2928e-12	1.2928					5.42808	-2.86761e-12	-2.86761
				4.57272	1.63851e-12					-5.42504	2.12607e-12	2.12607					5.42576	-1.27139e-12	-1.27139
				4.57504	2.7555e-12					-5.42272	1.84235e-12	1.84235					5.42344	-1.06397e-12	-1.06397
				4.57736	1.37863e-12					-5.4204	4.25157e-12	4.25157					5.42112	-1.4812e-12	-1.4812
				4.57968	4.51181e-13					-5.41808	2.20475e-12	2.20475					5.4188	-2.17977e-12	-2.17977
				4.582	1.08061e-12					-5.41576	2.77099e-12	2.77099					5.41648	-2.58866e-12	-2.58866
				4.58432	1.99136e-12					-5.41344	2.60529e-12	2.60529					5.41416	-2.40984e-12	-2.40984
				4.58664	1.75295e-12					-5.41112	2.18687e-12	2.18687					5.41184	2.75943e-13	0.275943
				4.58896	5.8708e-13					-5.4088	3.50532e-12	3.50532					5.40952	-5.23951e-13	-0.523951
				4.59128	6.65758e-13					-5.40648	1.19982e-12	1.19982					5.4072	-8.18398e-13	-0.818398
				4.5936	2.81904e-13					-5.40416	1.5038e-12	1.5038					5.40488	-5.21567e-13	-0.521567
				4.59592	1.39055e-12					-5.40184	-3.46329e-13	-0.346329					5.40256	-2.4158e-12	-2.4158
				4.59824	2.29535e-12					-5.39952	9.54244e-13	0.954244					5.40024	-3.33216e-13	-0.333216
				4.60056	1.37744e-12					-5.3972	1.66712e-12	1.66712					5.39792	-1.73154e-12	-1.73154
				4.60288	8.79142e-13					-5.39488	1.43943e-12	1.43943					5.3956	-8.18398e-13	-0.818398
				4.6052	1.39532e-12					-5.39256	1.5944e-12	1.5944					5.39328	-1.10688e-12	-1.10688
				4.60752	2.86994e-12					-5.39024	2.4992e-12	2.4992					5.39096	-2.64111e-12	-2.64111
				4.60984	1.14975e-12					-5.38792	2.17256e-12	2.17256					5.38864	-1.95089e-12	-1.95089
				4.61216	1.03054e-12					-5.3856	2.67205e-12	2.67205					5.38632	-5.00109e-13	-0.500109
				4.61448	3.20015e-12					-5.38328	9.49476e-13	0.949476					5.384	-1.84241e-12	-1.84241
				4.6168	2.35734e-12					-5.38096	2.70781e-12	2.70781					5.38168	-1.51458e-12	-1.51458
				4.61912	-2.89109e-13					-5.37864	1.58129e-12	1.58129					5.37936	-2.99993e-12	-2.99993
				4.62144	1.47757e-12					-5.37632	1.03054e-12	1.03054					5.37704	-3.09053e-12	-3.09053
				4.62376	2.71616e-12					-5.374	7.1821e-13	0.71821					5.37472	-2.0248e-12	-2.0248
				4.62608	2.48847e-12					-5.37168	1.41558e-12	1.41558					5.3724	-1.33696e-12	-1.33696
				4.6284	1.77e-13					-5.36936	3.22435e-13	0.322435					5.37008	-1.92228e-12	-1.92228
				4.63072	-3.04244e-14					-5.36704	9.11329e-13	0.911329					5.36776	-4.04062e-12	-4.04062
				4.63304	9.81662e-13					-5.36472	-6.19318e-13	-0.619318					5.36544	-1.11642e-12	-1.11642
				4.63536	3.29075e-12					-5.3624	3.9309e-12	3.9309					5.36312	-2.36335e-12	-2.36335
[truncated: 84,207 more rows]
