# Supplementary material for: Long-distance electron transport in multicellular freshwater cable bacteria
Source: eLife. 2024 Aug 29;12:RP91097. doi: 10.7554/eLife.91097 (PMC11361709; doi:10.7554/eLife.91097)
Supplement: Figure 6—source data 3. [file elife-91097-fig6-data3.xlsx]

## Sheet: CablesonAuIDA10005
CablesonAuIDA10005Bias_Ext	CablesonAuIDA10005Cur_Ext	CablesonAuIDA10005Bias_Ret	CablesonAuIDA10005Cur_Ret	CablesonAuIDA10005Bias_Towd	CablesonAuIDA10005Cur_Towd							Last full scan	9.99968	3.04705e-11	30.4705		First full scan	9.9992	9.1924e-11	91.924		Second full scan	-9.99992	-3.30931e-11	-33.0931		Third full scan	9.99936	4.61179e-11	46.1179		Fourth full scan	-9.99904	-4.45122e-11	-44.5122		Fifth full scan	9.99976	3.66729e-11	36.6729		Sixth full scan	-9.99952	-2.325e-11	-23.25
0	3.95153e-13	-0.00440121	1.9258e-12	0	3.95153e-13								9.99736	2.70766e-11	27.0766			9.99848	8.94326e-11	89.4326			-9.99776	-3.09557e-11	-30.9557			9.99704	4.54944e-11	45.4944			-9.99864	-4.33678e-11	-43.3678			9.99792	3.58742e-11	35.8742			-9.9972	-2.2263e-11	-22.263
				0.00231862	3.43976e-12								9.99504	2.67523e-11	26.7523			9.99616	8.63582e-11	86.3582			-9.99544	-3.02094e-11	-30.2094			9.99472	4.25499e-11	42.5499			-9.99632	-4.18276e-11	-41.8276			9.9956	3.21752e-11	32.1752			-9.99488	-2.35039e-11	-23.5039
				0.00463963	2.48251e-12								9.99272	2.53981e-11	25.3981			9.99384	8.663e-11	86.63			-9.99312	-3.18319e-11	-31.8319			9.9924	4.35596e-11	43.5596			-9.994	-4.00299e-11	-40.0299			9.99328	3.28237e-11	32.8237			-9.99256	-2.49893e-11	-24.9893
				0.00695944	-1.42994e-12								9.9904	2.71052e-11	27.1052			9.99152	8.58003e-11	85.8003			-9.9908	-3.16733e-11	-31.6733			9.99008	4.42928e-11	44.2928			-9.99168	-4.02493e-11	-40.2493			9.99096	3.35055e-11	33.5055			-9.99024	-2.26182e-11	-22.6182
				0.00927925	-1.28689e-12								9.98808	2.67213e-11	26.7213			9.9892	8.94016e-11	89.4016			-9.98848	-3.22002e-11	-32.2002			9.98776	4.14854e-11	41.4854			-9.98936	-4.11648e-11	-41.1648			9.98864	3.47537e-11	34.7537			-9.98792	-2.4069e-11	-24.069
				0.0116003	4.34492e-13								9.98576	2.64626e-11	26.4626			9.98688	8.88246e-11	88.8246			-9.98616	-3.14397e-11	-31.4397			9.98544	4.25487e-11	42.5487			-9.98704	-4.04984e-11	-40.4984			9.98632	3.45176e-11	34.5176			-9.9856	-2.6117e-11	-26.117
				0.0139189	1.18551e-12								9.98344	2.66617e-11	26.6617			9.98456	8.84241e-11	88.4241			-9.98384	-3.06291e-11	-30.6291			9.98312	4.43154e-11	44.3154			-9.98472	-3.9863e-11	-39.863			9.984	3.37285e-11	33.7285			-9.98328	-2.30712e-11	-23.0712
				0.0162399	1.14617e-12								9.98112	2.70492e-11	27.0492			9.98224	8.94028e-11	89.4028			-9.98152	-3.20477e-11	-32.0477			9.9808	4.32557e-11	43.2557			-9.9824	-4.23998e-11	-42.3998			9.98168	3.2373e-11	32.373			-9.98096	-2.24e-11	-22.4
				0.0185585	2.53734e-12								9.9788	2.64865e-11	26.4865			9.97992	8.79377e-11	87.9377			-9.9792	-3.1038e-11	-31.038			9.97848	4.39757e-11	43.9757			-9.98008	-3.90834e-11	-39.0834			9.97936	3.33053e-11	33.3053			-9.97864	-2.29425e-11	-22.9425
				0.0208795	1.89123e-12								9.97648	2.65747e-11	26.5747			9.9776	8.75634e-11	87.5634			-9.97688	-3.10546e-11	-31.0546			9.97616	4.34464e-11	43.4464			-9.97776	-3.93051e-11	-39.3051			9.97704	3.3583e-11	33.583			-9.97632	-2.24167e-11	-22.4167
				0.0232005	2.4837e-12								9.97416	2.73567e-11	27.3567			9.97528	8.78268e-11	87.8268			-9.97456	-3.28797e-11	-32.8797			9.97384	4.36741e-11	43.6741			-9.97544	-4.11803e-11	-41.1803			9.97472	3.22956e-11	32.2956			-9.974	-2.37495e-11	-23.7495
				0.0255203	6.56221e-13								9.97184	2.74294e-11	27.4294			9.97296	8.7412e-11	87.412			-9.97224	-3.07697e-11	-30.7697			9.97152	4.46993e-11	44.6993			-9.97312	-4.24618e-11	-42.4618			9.9724	3.22276e-11	32.2276			-9.97168	-2.32739e-11	-23.2739
				0.0278389	-8.87539e-13								9.96952	2.66534e-11	26.6534			9.97064	8.77255e-11	87.7255			-9.96992	-3.11095e-11	-31.1095			9.9692	4.32723e-11	43.2723			-9.9708	-4.30709e-11	-43.0709			9.97008	3.349e-11	33.49			-9.96936	-2.35468e-11	-23.5468
				0.03016	4.1661e-13								9.9672	2.63959e-11	26.3959			9.96832	8.84002e-11	88.4002			-9.9676	-3.12776e-11	-31.2776			9.96688	4.27097e-11	42.7097			-9.96848	-4.22067e-11	-42.2067			9.96776	3.22669e-11	32.2669			-9.96704	-2.21402e-11	-22.1402
				0.0324798	1.90315e-12								9.96488	2.73508e-11	27.3508			9.966	8.87507e-11	88.7507			-9.96528	-3.08877e-11	-30.8877			9.96456	4.16416e-11	41.6416			-9.96616	-4.31258e-11	-43.1258			9.96544	3.51494e-11	35.1494			-9.96472	-2.42991e-11	-24.2991
				0.0347996	1.03292e-12								9.96256	2.65234e-11	26.5234			9.96368	8.77171e-11	87.7171			-9.96296	-3.07411e-11	-30.7411			9.96224	4.14163e-11	41.4163			-9.96384	-4.26287e-11	-42.6287			9.96312	3.48037e-11	34.8037			-9.9624	-2.09838e-11	-20.9838
				0.0371206	-1.41289e-13								9.96024	2.48748e-11	24.8748			9.96136	8.79877e-11	87.9877			-9.96064	-3.07316e-11	-30.7316			9.95992	4.27323e-11	42.7323			-9.96152	-4.12995e-11	-41.2995			9.9608	3.40491e-11	34.0491			-9.96008	-2.02292e-11	-20.2292
				0.0394392	-2.08877e-14								9.95792	2.52205e-11	25.2205			9.95904	8.95554e-11	89.5554			-9.95832	-3.23671e-11	-32.3671			9.9576	4.43917e-11	44.3917			-9.9592	-4.29267e-11	-42.9267			9.95848	3.45975e-11	34.5975			-9.95776	-2.29365e-11	-22.9365
				0.0417602	9.20866e-13								9.9556	2.65008e-11	26.5008			9.95672	8.93289e-11	89.3289			-9.956	-3.30383e-11	-33.0383			9.95528	4.37778e-11	43.7778			-9.95688	-4.11481e-11	-41.1481			9.95616	3.43138e-11	34.3138			-9.95544	-2.40404e-11	-24.0404
				0.0440788	6.41916e-13								9.95328	2.81268e-11	28.1268			9.9544	8.7592e-11	87.592			-9.95368	-3.34305e-11	-33.4305			9.95296	4.32616e-11	43.2616			-9.95456	-4.0074e-11	-40.074			9.95384	3.41636e-11	34.1636			-9.95312	-2.2195e-11	-22.195
				0.0463998	1.30472e-12								9.95096	2.80517e-11	28.0517			9.95208	8.75336e-11	87.5336			-9.95136	-3.34531e-11	-33.4531			9.95064	4.32104e-11	43.2104			-9.95224	-4.12125e-11	-41.2125			9.95152	3.26377e-11	32.6377			-9.9508	-2.22177e-11	-22.2177
				0.0487185	2.83096e-13								9.94864	2.75844e-11	27.5844			9.94976	8.86696e-11	88.6696			-9.94904	-3.1454e-11	-31.454			9.94832	4.27037e-11	42.7037			-9.94992	-4.17823e-11	-41.7823			9.9492	3.40515e-11	34.0515			-9.94848	-2.2673e-11	-22.673
				0.0510395	6.08537e-13								9.94632	2.79683e-11	27.9683			9.94744	8.82321e-11	88.2321			-9.94672	-3.20179e-11	-32.0179			9.946	4.21732e-11	42.1732			-9.9476	-4.04924e-11	-40.4924			9.94688	3.40825e-11	34.0825			-9.94616	-2.34324e-11	-23.4324
				0.0533593	1.59917e-12								9.944	2.73138e-11	27.3138			9.94512	8.9218e-11	89.218			-9.9444	-3.10582e-11	-31.0582			9.94368	4.26405e-11	42.6405			-9.94528	-4.32843e-11	-43.2843			9.94456	3.30907e-11	33.0907			-9.94384	-2.20806e-11	-22.0806
				0.0556803	1.08537e-12								9.94168	2.66653e-11	26.6653			9.9428	8.90928e-11	89.0928			-9.94208	-3.08079e-11	-30.8079			9.94136	4.33427e-11	43.3427			-9.94296	-4.26692e-11	-42.6692			9.94224	3.38381e-11	33.8381			-9.94152	-2.23094e-11	-22.3094
				0.0580001	9.31595e-13								9.93936	2.82699e-11	28.2699			9.94048	8.73333e-11	87.3333			-9.93976	-2.97433e-11	-29.7433			9.93904	4.29731e-11	42.9731			-9.94064	-4.13674e-11	-41.3674			9.93992	3.35365e-11	33.5365			-9.9392	-2.09683e-11	-20.9683
				0.0603199	-3.40369e-13								9.93704	2.63375e-11	26.3375			9.93816	8.82643e-11	88.2643			-9.93744	-2.9549e-11	-29.549			9.93672	4.3419e-11	43.419			-9.93832	-4.2035e-11	-42.035			9.9376	3.33613e-11	33.3613			-9.93688	-2.26611e-11	-22.6611
				0.0626385	-9.19726e-13								9.93472	2.54708e-11	25.4708			9.93584	8.88496e-11	88.8496			-9.93512	-3.15398e-11	-31.5398			9.9344	4.16153e-11	41.6153			-9.936	-4.08024e-11	-40.8024			9.93528	3.09461e-11	30.9461			-9.93456	-2.25491e-11	-22.5491
				0.0649595	-5.78787e-13								9.9324	2.51728e-11	25.1728			9.93352	8.86911e-11	88.6911			-9.9328	-3.17067e-11	-31.7067			9.93208	4.10241e-11	41.0241			-9.93368	-4.10015e-11	-41.0015			9.93296	3.29107e-11	32.9107			-9.93224	-2.19649e-11	-21.9649
				0.0672805	2.9665e-12								9.93008	2.62481e-11	26.2481			9.9312	8.92132e-11	89.2132			-9.93048	-3.04836e-11	-30.4836			9.92976	4.22805e-11	42.2805			-9.93136	-4.15641e-11	-41.5641			9.93064	3.1783e-11	31.783			-9.92992	-2.41381e-11	-24.1381
				0.0695992	2.1964e-12								9.92776	2.72935e-11	27.2935			9.92888	9.14591e-11	91.4591			-9.92816	-3.18986e-11	-31.8986			9.92744	4.23282e-11	42.3282			-9.92904	-4.18443e-11	-41.8443			9.92832	3.37332e-11	33.7332			-9.9276	-2.25979e-11	-22.5979
				0.0719202	2.99034e-12								9.92544	2.71636e-11	27.1636			9.92656	8.88842e-11	88.8842			-9.92584	-3.1541e-11	-31.541			9.92512	4.18096e-11	41.8096			-9.92672	-4.12148e-11	-41.2148			9.926	3.30633e-11	33.0633			-9.92528	-2.24728e-11	-22.4728
				0.0742388	-1.57978e-13								9.92312	2.42561e-11	24.2561			9.92424	8.79317e-11	87.9317			-9.92352	-3.28499e-11	-32.8499			9.9228	4.41163e-11	44.1163			-9.9244	-4.32545e-11	-43.2545			9.92368	3.2348e-11	32.348			-9.92296	-2.40475e-11	-24.0475
				0.0765598	-3.21295e-13								9.9208	2.64483e-11	26.4483			9.92192	8.86398e-11	88.6398			-9.9212	-3.2838e-11	-32.838			9.92048	4.28241e-11	42.8241			-9.92208	-4.40365e-11	-44.0365			9.92136	3.43615e-11	34.3615			-9.92064	-2.35302e-11	-23.5302
				0.0788784	8.64837e-13								9.91848	2.72923e-11	27.2923			9.9196	8.82441e-11	88.2441			-9.91888	-3.10391e-11	-31.0391			9.91816	4.31472e-11	43.1472			-9.91976	-4.34429e-11	-43.4429			9.91904	3.36331e-11	33.6331			-9.91832	-2.1202e-11	-21.202
				0.0811994	2.318e-12								9.91616	2.52443e-11	25.2443			9.91728	8.83192e-11	88.3192			-9.91656	-3.02881e-11	-30.2881			9.91584	4.43774e-11	44.3774			-9.91744	-4.13758e-11	-41.3758			9.91672	3.35687e-11	33.5687			-9.916	-2.06429e-11	-20.6429
				0.0835204	-6.97996e-13								9.91384	2.57534e-11	25.7534			9.91496	8.92657e-11	89.2657			-9.91424	-3.33601e-11	-33.3601			9.91352	4.31567e-11	43.1567			-9.91512	-4.18419e-11	-41.8419			9.9144	3.47167e-11	34.7167			-9.91368	-1.97083e-11	-19.7083
				0.0858402	6.443e-13								9.91152	2.53027e-11	25.3027			9.91264	8.8591e-11	88.591			-9.91192	-3.24732e-11	-32.4732			9.9112	4.28062e-11	42.8062			-9.9128	-4.01658e-11	-40.1658			9.91208	3.25733e-11	32.5733			-9.91136	-2.16013e-11	-21.6013
				0.0881588	1.51214e-12								9.9092	2.37125e-11	23.7125			9.91032	8.76289e-11	87.6289			-9.9096	-3.11929e-11	-31.1929			9.90888	4.13984e-11	41.3984			-9.91048	-4.28218e-11	-42.8218			9.90976	3.31193e-11	33.1193			-9.90904	-2.03926e-11	-20.3926
				0.0904799	-7.76675e-13								9.90688	2.56341e-11	25.6341			9.908	8.83549e-11	88.3549			-9.90728	-3.16793e-11	-31.6793			9.90656	4.03839e-11	40.3839			-9.90816	-4.23748e-11	-42.3748			9.90744	3.20381e-11	32.0381			-9.90672	-2.17706e-11	-21.7706
				0.0927997	-4.3216e-13								9.90456	2.60788e-11	26.0788			9.90568	8.71211e-11	87.1211			-9.90496	-3.10236e-11	-31.0236			9.90424	4.10801e-11	41.0801			-9.90584	-4.00466e-11	-40.0466			9.90512	3.2025e-11	32.025			-9.9044	-2.22439e-11	-22.2439
				0.0951195	9.8047e-13								9.90224	2.53468e-11	25.3468			9.90336	8.78352e-11	87.8352			-9.90264	-3.05349e-11	-30.5349			9.90192	4.24856e-11	42.4856			-9.90352	-4.14688e-11	-41.4688			9.9028	3.51923e-11	35.1923			-9.90208	-2.21044e-11	-22.1044
				0.0974405	2.47333e-13								9.89992	2.76392e-11	27.6392			9.90104	8.72069e-11	87.2069			-9.90032	-2.99782e-11	-29.9782			9.8996	4.31007e-11	43.1007			-9.9012	-3.97164e-11	-39.7164			9.90048	3.24863e-11	32.4863			-9.89976	-2.0991e-11	-20.991
				0.0997591	4.97673e-13								9.8976	2.5956e-11	25.956			9.89872	8.71557e-11	87.1557			-9.898	-3.13205e-11	-31.3205			9.89728	4.32342e-11	43.2342			-9.89888	-4.11839e-11	-41.1839			9.89816	3.15541e-11	31.5541			-9.89744	-2.38556e-11	-23.8556
				0.10208	1.00074e-12								9.89528	2.80732e-11	28.0732			9.8964	8.57335e-11	85.7335			-9.89568	-3.12037e-11	-31.2037			9.89496	4.24903e-11	42.4903			-9.89656	-4.36455e-11	-43.6455			9.89584	3.34948e-11	33.4948			-9.89512	-2.47413e-11	-24.7413
				0.104399	2.92001e-12								9.89296	2.79325e-11	27.9325			9.89408	8.53663e-11	85.3663			-9.89336	-3.10463e-11	-31.0463			9.89264	4.25094e-11	42.5094			-9.89424	-4.21793e-11	-42.1793			9.89352	3.27092e-11	32.7092			-9.8928	-2.13069e-11	-21.3069
				0.10672	2.91285e-12								9.89064	2.81638e-11	28.1638			9.89176	8.46189e-11	84.6189			-9.89104	-3.02655e-11	-30.2655			9.89032	4.13006e-11	41.3006			-9.89192	-3.99477e-11	-39.9477			9.8912	3.14539e-11	31.4539			-9.89048	-2.02745e-11	-20.2745
				0.109038	3.41592e-12								9.88832	2.5292e-11	25.292			9.88944	8.84026e-11	88.4026			-9.88872	-3.08782e-11	-30.8782			9.888	4.26978e-11	42.6978			-9.8896	-4.08334e-11	-40.8334			9.88888	3.38393e-11	33.8393			-9.88816	-2.13117e-11	-21.3117
				0.111361	7.4086e-13								9.886	2.80267e-11	28.0267			9.88712	8.83847e-11	88.3847			-9.8864	-3.16817e-11	-31.6817			9.88568	4.23902e-11	42.3902			-9.88728	-3.97927e-11	-39.7927			9.88656	3.43543e-11	34.3543			-9.88584	-2.18922e-11	-21.8922
				0.113679	-1.41087e-12								9.88368	2.73281e-11	27.3281			9.8848	8.75979e-11	87.5979			-9.88408	-3.35902e-11	-33.5902			9.88336	4.33725e-11	43.3725			-9.88496	-4.21304e-11	-42.1304			9.88424	3.28523e-11	32.8523			-9.88352	-2.20567e-11	-22.0567
				0.116	8.86295e-13								9.88136	2.73639e-11	27.3639			9.88248	8.75479e-11	87.5479			-9.88176	-3.24089e-11	-32.4089			9.88104	4.19956e-11	41.9956			-9.88264	-4.05568e-11	-40.5568			9.88192	3.28034e-11	32.8034			-9.8812	-2.253e-11	-22.53
				0.11832	-1.0437e-12								9.87904	2.61658e-11	26.1658			9.88016	8.66109e-11	86.6109			-9.87944	-3.1181e-11	-31.181			9.87872	4.19789e-11	41.9789			-9.88032	-4.12125e-11	-41.2125			9.8796	3.41063e-11	34.1063			-9.87888	-2.01482e-11	-20.1482
				0.12064	-4.92956e-13								9.87672	2.55209e-11	25.5209			9.87784	8.62723e-11	86.2723			-9.87712	-2.99865e-11	-29.9865			9.8764	4.46301e-11	44.6301			-9.878	-4.25869e-11	-42.5869			9.87728	3.25137e-11	32.5137			-9.87656	-2.06334e-11	-20.6334
				0.122958	4.46774e-14								9.8744	2.51549e-11	25.1549			9.87552	8.87495e-11	88.7495			-9.8748	-3.16042e-11	-31.6042			9.87408	4.07332e-11	40.7332			-9.87568	-4.03923e-11	-40.3923			9.87496	3.20166e-11	32.0166			-9.87424	-1.93209e-11	-19.3209
				0.125279	1.15571e-12								9.87208	2.53969e-11	25.3969			9.8732	8.78828e-11	87.8828			-9.87248	-3.24267e-11	-32.4267			9.87176	4.08417e-11	40.8417			-9.87336	-4.10313e-11	-41.0313			9.87264	3.15851e-11	31.5851			-9.87192	-1.9669e-11	-19.669
				0.1276	-1.61193e-14								9.86976	2.47198e-11	24.7198			9.87088	8.60291e-11	86.0291			-9.87016	-3.06756e-11	-30.6756			9.86944	4.25976e-11	42.5976			-9.87104	-4.20767e-11	-42.0767			9.87032	3.30156e-11	33.0156			-9.8696	-2.07836e-11	-20.7836
				0.129919	7.28939e-13								9.86744	2.46113e-11	24.6113			9.86856	8.7642e-11	87.642			-9.86784	-3.26401e-11	-32.6401			9.86712	4.26477e-11	42.6477			-9.86872	-4.22186e-11	-42.2186			9.868	3.3707e-11	33.707			-9.86728	-2.14261e-11	-21.4261
				0.13224	1.33452e-12								9.86512	2.79289e-11	27.9289			9.86624	8.63903e-11	86.3903			-9.86552	-3.13002e-11	-31.3002			9.8648	4.16225e-11	41.6225			-9.8664	-4.23914e-11	-42.3914			9.86568	3.44175e-11	34.4175			-9.86496	-2.09803e-11	-20.9803
				0.134559	1.35598e-12								9.8628	2.63494e-11	26.3494			9.86392	8.72475e-11	87.2475			-9.8632	-3.22277e-11	-32.2277			9.86248	4.08917e-11	40.8917			-9.86408	-4.14735e-11	-41.4735			9.86336	3.31241e-11	33.1241			-9.86264	-2.09898e-11	-20.9898
				0.13688	8.81527e-13								9.86048	2.82412e-11	28.2412			9.8616	8.68851e-11	86.8851			-9.86088	-3.08568e-11	-30.8568			9.86016	4.10729e-11	41.0729			-9.86176	-4.09204e-11	-40.9204			9.86104	3.519e-11	35.19			-9.86032	-2.11472e-11	-21.1472
				0.139198	-1.17603e-12								9.85816	2.5627e-11	25.627			9.85928	8.73571e-11	87.3571			-9.85856	-3.04586e-11	-30.4586			9.85784	4.4865e-11	44.865			-9.85944	-4.07595e-11	-40.7595			9.85872	3.49062e-11	34.9062			-9.858	-2.18135e-11	-21.8135
				0.141521	-2.3308e-13								9.85584	2.65211e-11	26.5211			9.85696	8.73464e-11	87.3464			-9.85624	-3.21347e-11	-32.1347			9.85552	4.22281e-11	42.2281			-9.85712	-4.36086e-11	-43.6086			9.8564	3.23504e-11	32.3504			-9.85568	-2.23083e-11	-22.3083
				0.14384	-6.56273e-13								9.85352	2.70253e-11	27.0253			9.85464	8.79723e-11	87.9723			-9.85392	-3.11631e-11	-31.1631			9.8532	4.11588e-11	41.1588			-9.8548	-4.1098e-11	-41.098			9.85408	3.22455e-11	32.2455			-9.85336	-2.25324e-11	-22.5324
				0.14616	-1.54915e-12								9.8512	2.43288e-11	24.3288			9.85232	8.61317e-11	86.1317			-9.8516	-2.99174e-11	-29.9174			9.85088	4.26393e-11	42.6393			-9.85248	-4.10658e-11	-41.0658			9.85176	3.19797e-11	31.9797			-9.85104	-2.06012e-11	-20.6012
				0.148479	-1.75181e-12								9.84888	2.5348e-11	25.348			9.85	8.53342e-11	85.3342			-9.84928	-3.00068e-11	-30.0068			9.84856	4.43548e-11	44.3548			-9.85016	-4.15272e-11	-41.5272			9.84944	3.26282e-11	32.6282			-9.84872	-2.13129e-11	-21.3129
				0.1508	1.55625e-12								9.84656	2.61241e-11	26.1241			9.84768	8.41361e-11	84.1361			-9.84696	-3.07983e-11	-30.7983			9.84624	4.35286e-11	43.5286			-9.84784	-4.18097e-11	-41.8097			9.84712	3.02571e-11	30.2571			-9.8464	-2.1264e-11	-21.264
				0.15312	7.73046e-13								9.84424	2.36135e-11	23.6135			9.84536	8.5538e-11	85.538			-9.84464	-3.17115e-11	-31.7115			9.84392	4.25154e-11	42.5154			-9.84552	-4.17358e-11	-41.7358			9.8448	3.27342e-11	32.7342			-9.84408	-2.22665e-11	-22.2665
				0.155439	1.67665e-12								9.84192	2.62946e-11	26.2946			9.84304	8.74203e-11	87.4203			-9.84232	-3.14707e-11	-31.4707			9.8416	4.1613e-11	41.613			-9.8432	-4.07499e-11	-40.7499			9.84248	3.39299e-11	33.9299			-9.84176	-2.05928e-11	-20.5928
				0.15776	4.34492e-13								9.8396	2.68286e-11	26.8286			9.84072	8.79031e-11	87.9031			-9.84	-3.14945e-11	-31.4945			9.83928	4.13817e-11	41.3817			-9.84088	-4.03577e-11	-40.3577			9.84016	3.1951e-11	31.951			-9.83944	-2.16967e-11	-21.6967
				0.160079	6.01746e-14								9.83728	2.79742e-11	27.9742			9.8384	8.83788e-11	88.3788			-9.83768	-3.01749e-11	-30.1749			9.83696	4.37206e-11	43.7206			-9.83856	-4.09955e-11	-40.9955			9.83784	3.17865e-11	31.7865			-9.83712	-2.15549e-11	-21.5549
				0.1624	1.42154e-12								9.83496	2.61253e-11	26.1253			9.83608	8.66943e-11	86.6943			-9.83536	-2.92832e-11	-29.2832			9.83464	4.20552e-11	42.0552			-9.83624	-4.21196e-11	-42.1196			9.83552	3.1988e-11	31.988			-9.8348	-2.222e-11	-22.22
				0.164719	5.81119e-13								9.83264	2.63113e-11	26.3113			9.83376	8.66025e-11	86.6025			-9.83304	-2.99448e-11	-29.9448			9.83232	4.08774e-11	40.8774			-9.83392	-4.39352e-11	-43.9352			9.8332	3.3006e-11	33.006			-9.83248	-2.17361e-11	-21.7361
				0.16704	-3.76131e-13								9.83032	2.57212e-11	25.7212			9.83144	8.48704e-11	84.8704			-9.83072	-3.05981e-11	-30.5981			9.83	4.37039e-11	43.7039			-9.8316	-4.22877e-11	-42.2877			9.83088	3.4917e-11	34.917			-9.83016	-1.94985e-11	-19.4985
				0.169358	8.98216e-13								9.828	2.47031e-11	24.7031			9.82912	8.41993e-11	84.1993			-9.8284	-3.16555e-11	-31.6555			9.82768	4.12458e-11	41.2458			-9.82928	-4.1228e-11	-41.228			9.82856	3.43257e-11	34.3257			-9.82784	-2.05535e-11	-20.5535
				0.17168	1.66354e-12								9.82568	2.6595e-11	26.595			9.8268	8.69804e-11	86.9804			-9.82608	-3.22873e-11	-32.2873			9.82536	4.20469e-11	42.0469			-9.82696	-3.97784e-11	-39.7784			9.82624	3.39561e-11	33.9561			-9.82552	-2.1146e-11	-21.146
				0.173999	1.74341e-12								9.82336	2.3815e-11	23.815			9.82448	8.6078e-11	86.078			-9.82376	-3.0753e-11	-30.753			9.82304	4.1824e-11	41.824			-9.82464	-4.07428e-11	-40.7428			9.82392	3.1479e-11	31.479			-9.8232	-2.0631e-11	-20.631
				0.17632	1.61824e-12								9.82104	2.4808e-11	24.808			9.82216	8.5873e-11	85.873			-9.82144	-2.837e-11	-28.37			9.82072	4.03553e-11	40.3553			-9.82232	-4.12005e-11	-41.2005			9.8216	3.40372e-11	34.0372			-9.82088	-2.05654e-11	-20.5654
				0.17864	1.28684e-12								9.81872	2.72017e-11	27.2017			9.81984	8.60053e-11	86.0053			-9.81912	-3.15744e-11	-31.5744			9.8184	4.0819e-11	40.819			-9.82	-4.1247e-11	-41.247			9.81928	3.41671e-11	34.1671			-9.81856	-2.1345e-11	-21.345
				0.18096	1.57926e-13								9.8164	2.61408e-11	26.1408			9.81752	8.50755e-11	85.0755			-9.8168	-3.02845e-11	-30.2845			9.81608	4.10813e-11	41.0813			-9.81768	-4.05854e-11	-40.5854			9.81696	3.25721e-11	32.5721			-9.81624	-2.04605e-11	-20.4605
				0.183278	2.38595e-12								9.81408	2.47055e-11	24.7055			9.8152	8.699e-11	86.99			-9.81448	-3.09605e-11	-30.9605			9.81376	4.14484e-11	41.4484			-9.81536	-4.13913e-11	-41.3913			9.81464	3.23218e-11	32.3218			-9.81392	-2.1196e-11	-21.196
				0.185599	1.08418e-12								9.81176	2.52527e-11	25.2527			9.81288	8.70222e-11	87.0222			-9.81216	-3.07709e-11	-30.7709			9.81144	4.21172e-11	42.1172			-9.81304	-4.16798e-11	-41.6798			9.81232	3.33124e-11	33.3124			-9.8116	-2.05606e-11	-20.5606
				0.18792	-7.33398e-14								9.80944	2.74414e-11	27.4414			9.81056	8.58468e-11	85.8468			-9.80984	-3.09867e-11	-30.9867			9.80912	4.11707e-11	41.1707			-9.81072	-4.04102e-11	-40.4102			9.81	3.3012e-11	33.012			-9.80928	-2.15417e-11	-21.5417
				0.190239	1.07345e-12								9.80712	2.7923e-11	27.923			9.80824	8.58539e-11	85.8539			-9.80752	-3.0424e-11	-30.424			9.8068	4.15319e-11	41.5319			-9.8084	-4.00096e-11	-40.0096			9.80768	3.38083e-11	33.8083			-9.80696	-2.17921e-11	-21.7921
				0.19256	2.34899e-12								9.8048	2.63518e-11	26.3518			9.80592	8.56715e-11	85.6715			-9.8052	-3.17866e-11	-31.7866			9.80448	4.22102e-11	42.2102			-9.80608	-4.11636e-11	-41.1636			9.80536	3.30537e-11	33.0537			-9.80464	-2.23798e-11	-22.3798
				0.194879	6.00193e-13								9.80248	2.53778e-11	25.3778			9.8036	8.42541e-11	84.2541			-9.80288	-3.05563e-11	-30.5563			9.80216	4.139e-11	41.39			-9.80376	-4.25488e-11	-42.5488			9.80304	3.31896e-11	33.1896			-9.80232	-2.21759e-11	-22.1759
				0.1972	-1.08662e-12								9.80016	2.70575e-11	27.0575			9.80128	8.47369e-11	84.7369			-9.80056	-3.18414e-11	-31.8414			9.79984	4.20874e-11	42.0874			-9.80144	-4.06307e-11	-40.6307			9.80072	3.44473e-11	34.4473			-9.8	-2.16955e-11	-21.6955
				0.199519	-8.4224e-13								9.79784	2.52765e-11	25.2765			9.79896	8.62604e-11	86.2604			-9.79824	-3.0039e-11	-30.039			9.79752	4.47505e-11	44.7505			-9.79912	-3.97116e-11	-39.7116			9.7984	3.25137e-11	32.5137			-9.79768	-2.16741e-11	-21.6741
				0.20184	4.03497e-13								9.79552	2.68143e-11	26.8143			9.79664	8.75991e-11	87.5991			-9.79592	-2.96694e-11	-29.6694			9.7952	4.31508e-11	43.1508			-9.7968	-3.93921e-11	-39.3921			9.79608	3.22205e-11	32.2205			-9.79536	-2.15703e-11	-21.5703
				0.20416	1.99375e-12								9.7932	2.57355e-11	25.7355			9.79432	8.7803e-11	87.803			-9.7936	-2.8618e-11	-28.618			9.79288	4.37563e-11	43.7563			-9.79448	-4.01885e-11	-40.1885			9.79376	3.11333e-11	31.1333			-9.79304	-2.01208e-11	-20.1208
				0.20648	3.28359e-12								9.79088	2.5776e-11	25.776			9.792	8.66395e-11	86.6395			-9.79128	-3.12764e-11	-31.2764			9.79056	4.41175e-11	44.1175			-9.79216	-3.99357e-11	-39.9357			9.79144	3.13157e-11	31.3157			-9.79072	-2.21247e-11	-22.1247
				0.208799	2.37403e-12								9.78856	2.55722e-11	25.5722			9.78968	8.51196e-11	85.1196			-9.78896	-3.025e-11	-30.25			9.78824	4.21363e-11	42.1363			-9.78984	-4.09264e-11	-40.9264			9.78912	3.18771e-11	31.8771			-9.7884	-2.10959e-11	-21.0959
				0.21112	6.08537e-13								9.78624	2.71922e-11	27.1922			9.78736	8.56274e-11	85.6274			-9.78664	-3.14003e-11	-31.4003			9.78592	4.21422e-11	42.1422			-9.78752	-4.0893e-11	-40.893			9.7868	3.18223e-11	31.8223			-9.78608	-2.0693e-11	-20.693
				0.213439	-7.28991e-13								9.78392	2.56079e-11	25.6079			9.78504	8.56858e-11	85.6858			-9.78432	-3.21323e-11	-32.1323			9.7836	4.25976e-11	42.5976			-9.7852	-4.06987e-11	-40.6987			9.78448	3.31098e-11	33.1098			-9.78376	-2.114e-11	-21.14
				0.215759	-2.98645e-13								9.7816	2.39116e-11	23.9116			9.78272	8.66252e-11	86.6252			-9.782	-3.00187e-11	-30.0187			9.78128	4.24129e-11	42.4129			-9.78288	-4.1501e-11	-41.501			9.78216	3.48192e-11	34.8192			-9.78144	-1.8968e-11	-18.968
				0.21808	-1.03059e-12								9.77928	2.74437e-11	27.4437			9.7804	8.63355e-11	86.3355			-9.77968	-3.24947e-11	-32.4947			9.77896	4.0943e-11	40.943			-9.78056	-4.13186e-11	-41.3186			9.77984	3.33637e-11	33.3637			-9.77912	-1.99956e-11	-19.9956
				0.220399	-6.61042e-13								9.77696	2.54839e-11	25.4839			9.77808	8.44162e-11	84.4162			-9.77736	-3.24005e-11	-32.4005			9.77664	4.12708e-11	41.2708			-9.77824	-4.02254e-11	-40.2254			9.77752	3.35353e-11	33.5353			-9.7768	-2.09695e-11	-20.9695
				0.22272	1.61503e-13								9.77464	2.59334e-11	25.9334			9.77576	8.51983e-11	85.1983			-9.77504	-3.09021e-11	-30.9021			9.77432	4.10634e-11	41.0634			-9.77592	-4.18026e-11	-41.8026			9.7752	3.29691e-11	32.9691			-9.77448	-2.04116e-11	-20.4116
				0.225039	-6.06205e-13								9.77232	2.45529e-11	24.5529			9.77344	8.43483e-11	84.3483			-9.77272	-3.03799e-11	-30.3799			9.772	4.17012e-11	41.7012			-9.7736	-4.0167e-11	-40.167			9.77288	3.23528e-11	32.3528			-9.77216	-2.06381e-11	-20.6381
				0.22736	4.51181e-13								9.77	2.5385e-11	25.385			9.77112	8.40634e-11	84.0634			-9.7704	-3.03573e-11	-30.3573			9.76968	4.10682e-11	41.0682			-9.77128	-3.78198e-11	-37.8198			9.77056	3.19212e-11	31.9212			-9.76984	-2.1388e-11	-21.388
				0.229681	6.58605e-13								9.76768	2.35826e-11	23.5826			9.7688	8.52924e-11	85.2924			-9.76808	-3.11524e-11	-31.1524			9.76736	4.05067e-11	40.5067			-9.76896	-3.94851e-11	-39.4851			9.76824	3.24565e-11	32.4565			-9.76752	-2.06059e-11	-20.6059
				0.232	4.30916e-13								9.76536	2.64746e-11	26.4746			9.76648	8.44687e-11	84.4687			-9.76576	-3.25805e-11	-32.5805			9.76504	4.12446e-11	41.2446			-9.76664	-4.13376e-11	-41.3376			9.76592	3.0542e-11	30.542			-9.7652	-2.22284e-11	-22.2284
				0.234319	3.18859e-13								9.76304	2.64984e-11	26.4984			9.76416	8.41027e-11	84.1027			-9.76344	-3.26318e-11	-32.6318			9.76272	4.0738e-11	40.738			-9.76432	-4.15641e-11	-41.5641			9.7636	3.17901e-11	31.7901			-9.76288	-2.38759e-11	-23.8759
				0.23664	6.9556e-13								9.76072	2.64317e-11	26.4317			9.76184	8.48668e-11	84.8668			-9.76112	-2.97982e-11	-29.7982			9.7604	4.07237e-11	40.7237			-9.762	-4.1284e-11	-41.284			9.76128	3.25423e-11	32.5423			-9.76056	-2.3064e-11	-23.064
				0.23896	8.31459e-13								9.7584	2.78681e-11	27.8681			9.75952	8.62366e-11	86.2366			-9.7588	-3.0722e-11	-30.722			9.75808	4.17644e-11	41.7644			-9.75968	-4.01658e-11	-40.1658			9.75896	3.13621e-11	31.3621			-9.75824	-2.29448e-11	-22.9448
				0.24128	6.41916e-13								9.75608	2.66999e-11	26.6999			9.7572	8.54069e-11	85.4069			-9.75648	-3.14826e-11	-31.4826			9.75576	4.13531e-11	41.3531			-9.75736	-3.83228e-11	-38.3228			9.75664	3.33005e-11	33.3005			-9.75592	-2.07979e-11	-20.7979
				0.243598	6.97114e-14								9.75376	2.65068e-11	26.5068			9.75488	8.53544e-11	85.3544			-9.75416	-3.28654e-11	-32.8654			9.75344	4.21613e-11	42.1613			-9.75504	-4.11707e-11	-41.1707			9.75432	3.12811e-11	31.2811			-9.7536	-2.23953e-11	-22.3953
				0.245919	2.00329e-12								9.75144	2.49439e-11	24.9439			9.75256	8.4067e-11	84.067			-9.75184	-3.20786e-11	-32.0786			9.75112	4.11766e-11	41.1766			-9.75272	-4.1166e-11	-41.166			9.752	3.25602e-11	32.5602			-9.75128	-2.17062e-11	-21.7062
				0.24824	1.94249e-12								9.74912	2.69633e-11	26.9633			9.75024	8.39263e-11	83.9263			-9.74952	-3.29966e-11	-32.9966			9.7488	3.92848e-11	39.2848			-9.7504	-4.07642e-11	-40.7642			9.74968	3.31205e-11	33.1205			-9.74896	-2.1711e-11	-21.711
				0.250559	-6.97635e-14								9.7468	2.74569e-11	27.4569			9.74792	8.5805e-11	85.805			-9.7472	-3.21478e-11	-32.1478			9.74648	4.09192e-11	40.9192			-9.74808	-4.12935e-11	-41.2935			9.74736	3.18867e-11	31.8867			-9.74664	-2.10208e-11	-21.0208
				0.25288	-2.21159e-13								9.74448	2.63375e-11	26.3375			9.7456	8.4576e-11	84.576			-9.74488	-3.20155e-11	-32.0155			9.74416	3.99464e-11	39.9464			-9.74576	-4.20255e-11	-42.0255			9.74504	3.1777e-11	31.777			-9.74432	-2.16371e-11	-21.6371
				0.255198	8.46956e-13								9.74216	2.58618e-11	25.8618			9.74328	8.49575e-11	84.9575			-9.74256	-3.06887e-11	-30.6887			9.74184	4.05603e-11	40.5603			-9.74344	-3.89272e-11	-38.9272			9.74272	3.17913e-11	31.7913			-9.742	-2.12401e-11	-21.2401
				0.257519	1.24035e-12								9.73984	2.57534e-11	25.7534			9.74096	8.29559e-11	82.9559			-9.74024	-3.07614e-11	-30.7614			9.73952	4.14747e-11	41.4747			-9.74112	-4.05723e-11	-40.5723			9.7404	3.21966e-11	32.1966			-9.73968	-2.22236e-11	-22.2236
				0.259839	9.98352e-13								9.73752	2.40367e-11	24.0367			9.73864	8.35293e-11	83.5293			-9.73792	-3.25197e-11	-32.5197			9.7372	4.13483e-11	41.3483			-9.7388	-4.12339e-11	-41.2339			9.73808	3.14086e-11	31.4086			-9.73736	-2.10983e-11	-21.0983
				0.26216	2.47333e-13								9.7352	2.40105e-11	24.0105			9.73632	8.26162e-11	82.6162			-9.7356	-3.21359e-11	-32.1359			9.73488	4.22102e-11	42.2102			-9.73648	-4.24093e-11	-42.4093			9.73576	3.24601e-11	32.4601			-9.73504	-2.01386e-11	-20.1386
				0.26448	-1.70889e-12								9.73288	2.48021e-11	24.8021			9.734	8.54331e-11	85.4331			-9.73328	-3.13217e-11	-31.3217			9.73256	3.93241e-11	39.3241			-9.73416	-4.14866e-11	-41.4866			9.73344	3.28523e-11	32.8523			-9.73272	-2.12914e-11	-21.2914
				0.2668	1.24909e-14								9.73056	2.63709e-11	26.3709			9.73168	8.36545e-11	83.6545			-9.73096	-3.1181e-11	-31.181			9.73024	4.01646e-11	40.1646			-9.73184	-4.16309e-11	-41.6309			9.73112	3.13097e-11	31.3097			-9.7304	-2.23094e-11	-22.3094
				0.269119	-1.49634e-13								9.72824	2.51251e-11	25.1251			9.72936	8.41576e-11	84.1576			-9.72864	-3.11548e-11	-31.1548			9.72792	4.00775e-11	40.0775			-9.72952	-4.09109e-11	-40.9109			9.7288	3.17996e-11	31.7996			-9.72808	-2.16896e-11	-21.6896
				0.27144	-1.2559e-12								9.72592	2.65401e-11	26.5401			9.72704	8.32623e-11	83.2623			-9.72632	-3.07459e-11	-30.7459			9.7256	4.14782e-11	41.4782			-9.7272	-4.0614e-11	-40.614			9.72648	3.16554e-11	31.6554			-9.72576	-2.15537e-11	-21.5537
				0.273761	-1.38583e-12								9.7236	2.82019e-11	28.2019			9.72472	8.31955e-11	83.1955			-9.724	-3.03978e-11	-30.3978			9.72328	4.04912e-11	40.4912			-9.72488	-4.18479e-11	-41.8479			9.72416	3.29476e-11	32.9476			-9.72344	-2.05833e-11	-20.5833
				0.276079	-3.99612e-14								9.72128	2.35015e-11	23.5015			9.7224	8.45331e-11	84.5331			-9.72168	-3.04455e-11	-30.4455			9.72096	4.25964e-11	42.5964			-9.72256	-4.21185e-11	-42.1185			9.72184	3.14396e-11	31.4396			-9.72112	-1.90217e-11	-19.0217
				0.2784	1.37744e-12								9.71896	2.4324e-11	24.324			9.72008	8.58384e-11	85.8384			-9.71936	-3.15064e-11	-31.5064			9.71864	4.37027e-11	43.7027			-9.72024	-4.01396e-11	-40.1396			9.71952	3.26127e-11	32.6127			-9.7188	-2.05201e-11	-20.5201
				0.280719	3.1775e-12								9.71664	2.50166e-11	25.0166			9.71776	8.5606e-11	85.606			-9.71704	-3.25948e-11	-32.5948			9.71632	4.31901e-11	43.1901			-9.71792	-4.13519e-11	-41.3519			9.7172	3.0877e-11	30.877			-9.71648	-2.05237e-11	-20.5237
				0.28304	2.88782e-12								9.71432	2.55304e-11	25.5304			9.71544	8.60101e-11	86.0101			-9.71472	-3.12668e-11	-31.2668			9.714	4.20302e-11	42.0302			-9.7156	-4.01324e-11	-40.1324			9.71488	3.13848e-11	31.3848			-9.71416	-1.94437e-11	-19.4437
				0.285358	1.61943e-12								9.712	2.59703e-11	25.9703			9.71312	8.58861e-11	85.8861			-9.7124	-3.10606e-11	-31.0606			9.71168	4.02218e-11	40.2218			-9.71328	-4.13865e-11	-41.3865			9.71256	3.27879e-11	32.7879			-9.71184	-2.17372e-11	-21.7372
				0.287679	2.79126e-12								9.70968	2.48164e-11	24.8164			9.7108	8.41516e-11	84.1516			-9.71008	-3.08806e-11	-30.8806			9.70936	4.013e-11	40.13			-9.71096	-4.13221e-11	-41.3221			9.71024	3.27474e-11	32.7474			-9.70952	-2.22761e-11	-22.2761
				0.29	2.01163e-12								9.70736	2.41405e-11	24.1405			9.70848	8.23205e-11	82.3205			-9.70776	-3.08246e-11	-30.8246			9.70704	4.15629e-11	41.5629			-9.70864	-4.10217e-11	-41.0217			9.70792	3.12012e-11	31.2012			-9.7072	-2.1984e-11	-21.984
				0.29232	-6.372e-13								9.70504	2.3691e-11	23.691			9.70616	8.05121e-11	80.5121			-9.70544	-3.06946e-11	-30.6946			9.70472	4.04185e-11	40.4185			-9.70632	-4.02755e-11	-40.2755			9.7056	3.19046e-11	31.9046			-9.70488	-2.42967e-11	-24.2967
				0.294639	-8.00516e-13								9.70272	2.44838e-11	24.4838			9.70384	8.17054e-11	81.7054			-9.70312	-3.00199e-11	-30.0199			9.7024	3.99524e-11	39.9524			-9.704	-4.07809e-11	-40.7809			9.70328	2.94333e-11	29.4333			-9.70256	-2.15656e-11	-21.5656
				0.29696	2.49324e-12								9.7004	2.46089e-11	24.6089			9.70152	8.48216e-11	84.8216			-9.7008	-2.97469e-11	-29.7469			9.70008	4.04125e-11	40.4125			-9.70168	-4.03339e-11	-40.3339			9.70096	3.13157e-11	31.3157			-9.70024	-1.98144e-11	-19.8144
				0.29928	2.71139e-12								9.69808	2.67571e-11	26.7571			9.6992	8.33803e-11	83.3803			-9.69848	-2.97052e-11	-29.7052			9.69776	3.97318e-11	39.7318			-9.69936	-3.98177e-11	-39.8177			9.69864	3.11893e-11	31.1893			-9.69792	-2.03556e-11	-20.3556
				0.3016	2.42409e-12								9.69576	2.52372e-11	25.2372			9.69688	8.4216e-11	84.216			-9.69616	-3.23624e-11	-32.3624			9.69544	4.13924e-11	41.3924			-9.69704	-3.96174e-11	-39.6174			9.69632	3.16065e-11	31.6065			-9.6956	-2.16455e-11	-21.6455
				0.303921	2.58062e-13								9.69344	2.43252e-11	24.3252			9.69456	8.4098e-11	84.098			-9.69384	-3.10546e-11	-31.0546			9.69312	4.05043e-11	40.5043			-9.69472	-3.81583e-11	-38.1583			9.694	3.22014e-11	32.2014			-9.69328	-2.19864e-11	-21.9864
				0.306239	1.40366e-12								9.69112	2.52062e-11	25.2062			9.69224	8.66514e-11	86.6514			-9.69152	-3.11595e-11	-31.1595			9.6908	4.11373e-11	41.1373			-9.6924	-3.83979e-11	-38.3979			9.69168	3.13586e-11	31.3586			-9.69096	-2.21414e-11	-22.1414
				0.30856	2.41217e-12								9.6888	2.51466e-11	25.1466			9.68992	8.5265e-11	85.265			-9.6892	-3.17425e-11	-31.7425			9.68848	4.0875e-11	40.875			-9.69008	-3.79831e-11	-37.9831			9.68936	3.22574e-11	32.2574			-9.68864	-2.11388e-11	-21.1388
				0.310879	4.3827e-12								9.68648	2.60001e-11	26.0001			9.6876	8.42195e-11	84.2195			-9.68688	-3.21871e-11	-32.1871			9.68616	4.16726e-11	41.6726			-9.68776	-3.98332e-11	-39.8332			9.68704	3.3459e-11	33.459			-9.68632	-2.20496e-11	-22.0496
				0.3132	2.8604e-12								9.68416	2.53433e-11	25.3433			9.68528	8.22037e-11	82.2037			-9.68456	-3.16185e-11	-31.6185			9.68384	4.05377e-11	40.5377			-9.68544	-4.25107e-11	-42.5107			9.68472	3.3912e-11	33.912			-9.684	-2.24227e-11	-22.4227
				0.315518	7.15826e-13								9.68184	2.53981e-11	25.3981			9.68296	8.51899e-11	85.1899			-9.68224	-3.27283e-11	-32.7283			9.68152	4.21935e-11	42.1935			-9.68312	-4.05616e-11	-40.5616			9.6824	3.29667e-11	32.9667			-9.68168	-2.10065e-11	-21.0065
				0.317841	1.49307e-12								9.67952	2.31486e-11	23.1486			9.68064	8.44723e-11	84.4723			-9.67992	-3.22324e-11	-32.2324			9.6792	4.33629e-11	43.3629			-9.6808	-3.74347e-11	-37.4347			9.68008	3.19451e-11	31.9451			-9.67936	-2.01601e-11	-20.1601
				0.320159	1.07107e-12								9.6772	2.44778e-11	24.4778			9.67832	8.16041e-11	81.6041			-9.6776	-3.29381e-11	-32.9381			9.67688	4.10038e-11	41.0038			-9.67848	-3.8932e-11	-38.932			9.67776	3.16006e-11	31.6006			-9.67704	-2.03151e-11	-20.3151
				0.32248	1.61705e-12								9.67488	2.62338e-11	26.2338			9.676	8.37987e-11	83.7987			-9.67528	-3.1367e-11	-31.367			9.67456	3.87627e-11	38.7627			-9.67616	-3.83801e-11	-38.3801			9.67544	3.17341e-11	31.7341			-9.67472	-2.07514e-11	-20.7514
				0.3248	3.95153e-13								9.67256	2.57665e-11	25.7665			9.67368	8.30346e-11	83.0346			-9.67296	-3.11667e-11	-31.1667			9.67224	4.22579e-11	42.2579			-9.67384	-3.82704e-11	-38.2704			9.67312	3.17579e-11	31.7579			-9.6724	-2.01124e-11	-20.1124
				0.32712	-6.97635e-14								9.67024	2.64936e-11	26.4936			9.67136	8.26162e-11	82.6162			-9.67064	-3.07042e-11	-30.7042			9.66992	4.29791e-11	42.9791			-9.67152	-3.80308e-11	-38.0308			9.6708	3.05742e-11	30.5742			-9.67008	-2.06739e-11	-20.6739
				0.329438	4.58695e-14								9.66792	2.49368e-11	24.9368			9.66904	8.31693e-11	83.1693			-9.66832	-3.39085e-11	-33.9085			9.6676	4.23246e-11	42.3246			-9.6692	-3.90059e-11	-39.0059			9.66848	3.17925e-11	31.7925			-9.66776	-2.19935e-11	-21.9935
				0.331759	4.82175e-13								9.6656	2.46137e-11	24.6137			9.66672	8.3974e-11	83.974			-9.666	-3.24494e-11	-32.4494			9.66528	4.14341e-11	41.4341			-9.66688	-3.75039e-11	-37.5039			9.66616	3.26031e-11	32.6031			-9.66544	-2.04438e-11	-20.4438
				0.33408	1.65281e-12								9.66328	2.62421e-11	26.2421			9.6644	8.23992e-11	82.3992			-9.66368	-2.99925e-11	-29.9925			9.66296	4.06879e-11	40.6879			-9.66456	-3.84623e-11	-38.4623			9.66384	3.11643e-11	31.1643			-9.66312	-2.01851e-11	-20.1851
				0.336399	-1.96125e-13								9.66096	2.53874e-11	25.3874			9.66208	8.29714e-11	82.9714			-9.66136	-3.0877e-11	-30.877			9.66064	4.175e-11	41.75			-9.66224	-4.0657e-11	-40.657			9.66152	3.06743e-11	30.6743			-9.6608	-2.15215e-11	-21.5215
				0.33872	4.6191e-13								9.65864	2.44707e-11	24.4707			9.65976	8.37165e-11	83.7165			-9.65904	-3.03823e-11	-30.3823			9.65832	3.88926e-11	38.8926			-9.65992	-4.07821e-11	-40.7821			9.6592	3.14611e-11	31.4611			-9.65848	-1.94258e-11	-19.4258
				0.341039	1.17359e-12								9.65632	2.68441e-11	26.8441			9.65744	8.21322e-11	82.1322			-9.65672	-3.18653e-11	-31.8653			9.656	4.06486e-11	40.6486			-9.6576	-4.01682e-11	-40.1682			9.65688	3.1504e-11	31.504			-9.65616	-2.05952e-11	-20.5952
				0.34336	1.87812e-12								9.654	2.55364e-11	25.5364			9.65512	8.37999e-11	83.7999			-9.6544	-3.1609e-11	-31.609			9.65368	4.01574e-11	40.1574			-9.65528	-4.19671e-11	-41.9671			9.65456	2.98267e-11	29.8267			-9.65384	-1.98239e-11	-19.8239
				0.345678	2.16339e-13								9.65168	2.54553e-11	25.4553			9.6528	8.39251e-11	83.9251			-9.65208	-3.10654e-11	-31.0654			9.65136	4.22889e-11	42.2889			-9.65296	-3.85899e-11	-38.5899			9.65224	3.18378e-11	31.8378			-9.65152	-2.05225e-11	-20.5225
				0.348001	1.34084e-13								9.64936	2.4026e-11	24.026			9.65048	8.34447e-11	83.4447			-9.64976	-2.97052e-11	-29.7052			9.64904	4.32271e-11	43.2271			-9.65064	-3.80415e-11	-38.0415			9.64992	3.06362e-11	30.6362			-9.6492	-2.14297e-11	-21.4297
				0.35032	-8.04923e-14								9.64704	2.55722e-11	25.5722			9.64816	8.34578e-11	83.4578			-9.64744	-3.18152e-11	-31.8152			9.64672	4.11206e-11	41.1206			-9.64832	-3.9379e-11	-39.379			9.6476	3.08424e-11	30.8424			-9.64688	-2.06501e-11	-20.6501
				0.35264	2.61125e-12								9.64472	2.43932e-11	24.3932			9.64584	8.22276e-11	82.2276			-9.64512	-3.05969e-11	-30.5969			9.6444	4.02659e-11	40.2659			-9.646	-3.84373e-11	-38.4373			9.64528	3.14825e-11	31.4825			-9.64456	-2.05153e-11	-20.5153
				0.354959	2.92716e-12								9.6424	2.58296e-11	25.8296			9.64352	8.12465e-11	81.2465			-9.6428	-2.82973e-11	-28.2973			9.64208	4.15283e-11	41.5283			-9.64368	-4.06879e-11	-40.6879			9.64296	3.17377e-11	31.7377			-9.64224	-1.82981e-11	-18.2981
				0.35728	-3.73747e-13								9.64008	2.54863e-11	25.4863			9.6412	8.36438e-11	83.6438			-9.64048	-3.06374e-11	-30.6374			9.63976	4.16869e-11	41.6869			-9.64136	-3.96568e-11	-39.6568			9.64064	3.16363e-11	31.6363			-9.63992	-1.86652e-11	-18.6652
				0.3596	5.03633e-13								9.63776	2.53552e-11	25.3552			9.63888	8.27163e-11	82.7163			-9.63816	-2.922e-11	-29.22			9.63744	4.24534e-11	42.4534			-9.63904	-3.99643e-11	-39.9643			9.63832	3.04693e-11	30.4693			-9.6376	-2.01756e-11	-20.1756
				0.361919	3.82719e-12								9.63544	2.70277e-11	27.0277			9.63656	8.22466e-11	82.2466			-9.63584	-3.00104e-11	-30.0104			9.63512	4.16881e-11	41.6881			-9.63672	-4.08644e-11	-40.8644			9.636	3.08376e-11	30.8376			-9.63528	-2.17349e-11	-21.7349
				0.36424	2.4086e-12								9.63312	2.62254e-11	26.2254			9.63424	8.20976e-11	82.0976			-9.63352	-2.80434e-11	-28.0434			9.6328	4.14651e-11	41.4651			-9.6344	-3.71284e-11	-37.1284			9.63368	3.04681e-11	30.4681			-9.63296	-2.13963e-11	-21.3963
				0.366559	2.02951e-12								9.6308	2.56854e-11	25.6854			9.63192	8.17984e-11	81.7984			-9.6312	-3.06767e-11	-30.6767			9.63048	4.15915e-11	41.5915			-9.63208	-3.84182e-11	-38.4182			9.63136	3.10307e-11	31.0307			-9.63064	-2.04653e-11	-20.4653
				0.36888	1.25465e-12								9.62848	2.4305e-11	24.305			9.6296	8.23229e-11	82.3229			-9.62888	-3.09736e-11	-30.9736			9.62816	4.11802e-11	41.1802			-9.62976	-3.77375e-11	-37.7375			9.62904	3.06004e-11	30.6004			-9.62832	-2.09624e-11	-20.9624
				0.371199	1.22843e-12								9.62616	2.40355e-11	24.0355			9.62728	8.3031e-11	83.031			-9.62656	-3.08973e-11	-30.8973			9.62584	3.9106e-11	39.106			-9.62744	-3.74061e-11	-37.4061			9.62672	3.06231e-11	30.6231			-9.626	-1.98847e-11	-19.8847
				0.37352	3.13458e-12								9.62384	2.67082e-11	26.7082			9.62496	8.25149e-11	82.5149			-9.62424	-2.91723e-11	-29.1723			9.62352	3.9882e-11	39.882			-9.62512	-3.8659e-11	-38.659			9.6244	3.0517e-11	30.517			-9.62368	-1.96845e-11	-19.6845
				0.375838	2.48847e-12								9.62152	2.63697e-11	26.3697			9.62264	8.26388e-11	82.6388			-9.62192	-3.03942e-11	-30.3942			9.6212	4.085e-11	40.85			-9.6228	-3.78675e-11	-37.8675			9.62208	3.16196e-11	31.6196			-9.62136	-2.07311e-11	-20.7311
				0.37816	2.37641e-12								9.6192	2.63351e-11	26.3351			9.62032	8.19093e-11	81.9093			-9.6196	-3.10082e-11	-31.0082			9.61888	4.00609e-11	40.0609			-9.62048	-3.8032e-11	-38.032			9.61976	3.18974e-11	31.8974			-9.61904	-2.30783e-11	-23.0783
				0.380479	-7.25415e-13								9.61688	2.518e-11	25.18			9.618	8.26972e-11	82.6972			-9.61728	-3.09998e-11	-30.9998			9.61656	4.10884e-11	41.0884			-9.61816	-3.89046e-11	-38.9046			9.61744	3.13431e-11	31.3431			-9.61672	-2.35588e-11	-23.5588
				0.3828	8.25498e-13								9.61456	2.49272e-11	24.9272			9.61568	8.10319e-11	81.0319			-9.61496	-3.16829e-11	-31.6829			9.61424	3.87317e-11	38.7317			-9.61584	-3.93206e-11	-39.3206			9.61512	3.09175e-11	30.9175			-9.6144	-2.31165e-11	-23.1165
				0.38512	7.94504e-13								9.61224	2.5962e-11	25.962			9.61336	8.16768e-11	81.6768			-9.61264	-3.19094e-11	-31.9094			9.61192	3.91179e-11	39.1179			-9.61352	-3.83014e-11	-38.3014			9.6128	2.98112e-11	29.8112			-9.61208	-2.16848e-11	-21.6848
				0.38744	1.8805e-12								9.60992	2.47913e-11	24.7913			9.61104	8.10617e-11	81.0617			-9.61032	-3.12656e-11	-31.2656			9.6096	3.95161e-11	39.5161			-9.6112	-4.01861e-11	-40.1861			9.61048	2.83426e-11	28.3426			-9.60976	-2.01327e-11	-20.1327
				0.389758	2.19879e-12								9.6076	2.54339e-11	25.4339			9.60872	8.08555e-11	80.8555			-9.608	-2.87897e-11	-28.7897			9.60728	4.04745e-11	40.4745			-9.60888	-3.87401e-11	-38.7401			9.60816	3.12203e-11	31.2203			-9.60744	-2.18839e-11	-21.8839
				0.392079	4.30916e-13								9.60528	2.62063e-11	26.2063			9.6064	8.19915e-11	81.9915			-9.60568	-2.94584e-11	-29.4584			9.60496	3.94922e-11	39.4922			-9.60656	-4.02826e-11	-40.2826			9.60584	3.01236e-11	30.1236			-9.60512	-2.17265e-11	-21.7265
				0.3944	2.21071e-12								9.60296	2.5137e-11	25.137			9.60408	8.12918e-11	81.2918			-9.60336	-3.02214e-11	-30.2214			9.60264	4.07296e-11	40.7296			-9.60424	-3.82883e-11	-38.2883			9.60352	2.90876e-11	29.0876			-9.6028	-2.05726e-11	-20.5726
				0.396719	2.50909e-13								9.60064	2.48772e-11	24.8772			9.60176	8.11153e-11	81.1153			-9.60104	-2.99376e-11	-29.9376			9.60032	3.87877e-11	38.7877			-9.60192	-3.69472e-11	-36.9472			9.6012	2.98363e-11	29.8363			-9.60048	-2.02269e-11	-20.2269
				0.39904	1.46684e-12								9.59832	2.4727e-11	24.727			9.59944	8.17793e-11	81.7793			-9.59872	-3.04193e-11	-30.4193			9.598	4.03994e-11	40.3994			-9.5996	-3.95686e-11	-39.5686			9.59888	3.00687e-11	30.0687			-9.59816	-2.01923e-11	-20.1923
				0.401359	3.58996e-12								9.596	2.59369e-11	25.9369			9.59712	8.23432e-11	82.3432			-9.5964	-2.8829e-11	-28.829			9.59568	4.08619e-11	40.8619			-9.59728	-3.64e-11	-36.4			9.59656	3.16542e-11	31.6542			-9.59584	-1.89919e-11	-18.9919
				0.40368	1.5491e-12								9.59368	2.66057e-11	26.6057			9.5948	8.14563e-11	81.4563			-9.59408	-2.97386e-11	-29.7386			9.59336	4.26143e-11	42.6143			-9.59496	-3.61723e-11	-36.1723			9.59424	3.19057e-11	31.9057			-9.59352	-2.03294e-11	-20.3294
				0.405998	-6.77731e-13								9.59136	2.56282e-11	25.6282			9.59248	8.37511e-11	83.7511			-9.59176	-3.02702e-11	-30.2702			9.59104	4.12219e-11	41.2219			-9.59264	-3.39717e-11	-33.9717			9.59192	3.15135e-11	31.5135			-9.5912	-2.24918e-11	-22.4918
				0.40832	7.20956e-14								9.58904	2.21902e-11	22.1902			9.59016	8.27461e-11	82.7461			-9.58944	-2.81745e-11	-28.1745			9.58872	4.03934e-11	40.3934			-9.59032	-3.59506e-11	-35.9506			9.5896	3.23254e-11	32.3254			-9.58888	-1.78975e-11	-17.8975
				0.41064	1.25465e-12								9.58672	2.37471e-11	23.7471			9.58784	8.29798e-11	82.9798			-9.58712	-2.88898e-11	-28.8898			9.5864	4.01801e-11	40.1801			-9.588	-3.84277e-11	-38.4277			9.58728	3.11202e-11	31.1202			-9.58656	-1.90991e-11	-19.0991
				0.41296	1.56734e-13								9.5844	2.50703e-11	25.0703			9.58552	8.18699e-11	81.8699			-9.5848	-2.99925e-11	-29.9925			9.58408	4.09156e-11	40.9156			-9.58568	-3.63821e-11	-36.3821			9.58496	3.09866e-11	30.9866			-9.58424	-2.16216e-11	-21.6216
				0.415279	-9.03036e-13								9.58208	2.52706e-11	25.2706			9.5832	8.30978e-11	83.0978			-9.58248	-3.07971e-11	-30.7971			9.58176	3.94863e-11	39.4863			-9.58336	-3.6766e-11	-36.766			9.58264	3.06385e-11	30.6385			-9.58192	-2.18779e-11	-21.8779
				0.4176	2.00925e-12								9.57976	2.61968e-11	26.1968			9.58088	8.33708e-11	83.3708			-9.58016	-3.1777e-11	-31.777			9.57944	3.78507e-11	37.8507			-9.58104	-3.51697e-11	-35.1697			9.58032	2.90924e-11	29.0924			-9.5796	-1.91683e-11	-19.1683
				0.419919	-4.64346e-13								9.57744	2.22391e-11	22.2391			9.57856	8.27151e-11	82.7151			-9.57784	-3.14731e-11	-31.4731			9.57712	3.95936e-11	39.5936			-9.57872	-3.65907e-11	-36.5907			9.578	2.98089e-11	29.8089			-9.57728	-2.08503e-11	-20.8503
				0.422239	1.27373e-12								9.57512	2.50536e-11	25.0536			9.57624	8.05849e-11	80.5849			-9.57552	-3.19046e-11	-31.9046			9.5748	3.98212e-11	39.8212			-9.5764	-3.64477e-11	-36.4477			9.57568	3.07899e-11	30.7899			-9.57496	-2.23547e-11	-22.3547
				0.42456	1.13306e-12								9.5728	2.46936e-11	24.6936			9.57392	8.0797e-11	80.797			-9.5732	-3.16948e-11	-31.6948			9.57248	4.07093e-11	40.7093			-9.57408	-3.7579e-11	-37.579			9.57336	3.14396e-11	31.4396			-9.57264	-2.02447e-11	-20.2447
				0.426879	6.14498e-13								9.57048	2.4876e-11	24.876			9.5716	8.14467e-11	81.4467			-9.57088	-2.84606e-11	-28.4606			9.57016	3.96043e-11	39.6043			-9.57176	-3.70258e-11	-37.0258			9.57104	3.08352e-11	30.8352			-9.57032	-2.06405e-11	-20.6405
				0.4292	5.3582e-13								9.56816	2.63947e-11	26.3947			9.56928	8.01021e-11	80.1021			-9.56856	-3.01641e-11	-30.1641			9.56784	3.98093e-11	39.8093			-9.56944	-3.48729e-11	-34.8729			9.56872	3.11357e-11	31.1357			-9.568	-2.05881e-11	-20.5881
				0.431519	-6.49121e-13								9.56584	2.54041e-11	25.4041			9.56696	8.19045e-11	81.9045			-9.56624	-3.04801e-11	-30.4801			9.56552	4.00454e-11	40.0454			-9.56712	-3.44426e-11	-34.4426			9.5664	3.2261e-11	32.261			-9.56568	-2.12723e-11	-21.2723
				0.43384	1.98421e-12								9.56352	2.37316e-11	23.7316			9.56464	8.12357e-11	81.2357			-9.56392	-2.90722e-11	-29.0722			9.5632	4.03803e-11	40.3803			-9.5648	-3.48634e-11	-34.8634			9.56408	2.94083e-11	29.4083			-9.56336	-1.87916e-11	-18.7916
				0.436161	2.20833e-12								9.5612	2.32893e-11	23.2893			9.56232	8.0623e-11	80.623			-9.5616	-2.95216e-11	-29.5216			9.56088	4.0974e-11	40.974			-9.56248	-3.55917e-11	-35.5917			9.56176	3.05265e-11	30.5265			-9.56104	-2.03675e-11	-20.3675
				0.43848	7.77815e-13								9.55888	2.29865e-11	22.9865			9.56	7.98088e-11	79.8088			-9.55928	-2.93917e-11	-29.3917			9.55856	4.13412e-11	41.3412			-9.56016	-3.45332e-11	-34.5332			9.55944	3.05432e-11	30.5432			-9.55872	-2.01923e-11	-20.1923
				0.440799	-3.57058e-13								9.55656	2.43431e-11	24.3431			9.55768	7.97301e-11	79.7301			-9.55696	-2.90233e-11	-29.0233			9.55624	3.98165e-11	39.8165			-9.55784	-3.54117e-11	-35.4117			9.55712	3.11762e-11	31.1762			-9.5564	-2.06942e-11	-20.6942
				0.44312	-1.14026e-12								9.55424	2.39497e-11	23.9497			9.55536	8.0648e-11	80.648			-9.55464	-2.67536e-11	-26.7536			9.55392	3.86232e-11	38.6232			-9.55552	-3.44974e-11	-34.4974			9.5548	3.10641e-11	31.0641			-9.55408	-1.94282e-11	-19.4282
				0.44544	1.42631e-12								9.55192	2.45338e-11	24.5338			9.55304	8.24839e-11	82.4839			-9.55232	-2.85453e-11	-28.5453			9.5516	4.05663e-11	40.5663			-9.5532	-3.45296e-11	-34.5296			9.55248	3.03191e-11	30.3191			-9.55176	-2.10101e-11	-21.0101
				0.44776	-2.86164e-12								9.5496	2.53755e-11	25.3755			9.55072	8.1684e-11	81.684			-9.55	-2.84404e-11	-28.4404			9.54928	4.06867e-11	40.6867			-9.55088	-3.50338e-11	-35.0338			9.55016	3.02988e-11	30.2988			-9.54944	-2.25443e-11	-22.5443
				0.450078	-1.10927e-12								9.54728	2.43824e-11	24.3824			9.5484	8.19593e-11	81.9593			-9.54768	-2.95693e-11	-29.5693			9.54696	3.85946e-11	38.5946			-9.54856	-3.53712e-11	-35.3712			9.54784	2.84379e-11	28.4379			-9.54712	-2.04796e-11	-20.4796
				0.452399	1.03411e-12								9.54496	2.3883e-11	23.883			9.54608	8.12286e-11	81.2286			-9.54536	-3.17747e-11	-31.7747			9.54464	3.76111e-11	37.6111			-9.54624	-3.46846e-11	-34.6846			9.54552	2.97302e-11	29.7302			-9.5448	-2.11483e-11	-21.1483
				0.45472	-8.49392e-13								9.54264	2.54506e-11	25.4506			9.54376	8.23039e-11	82.3039			-9.54304	-2.99007e-11	-29.9007			9.54232	3.92741e-11	39.2741			-9.54392	-3.41708e-11	-34.1708			9.5432	2.9785e-11	29.785			-9.54248	-2.04069e-11	-20.4069
				0.457039	-8.04923e-14								9.54032	2.56544e-11	25.6544			9.54144	8.08745e-11	80.8745			-9.54072	-3.04443e-11	-30.4443			9.54	4.04376e-11	40.4376			-9.5416	-3.3949e-11	-33.949			9.54088	3.14635e-11	31.4635			-9.54016	-1.96272e-11	-19.6272
				0.45936	2.24683e-13								9.538	2.47413e-11	24.7413			9.53912	8.16744e-11	81.6744			-9.5384	-3.11595e-11	-31.1595			9.53768	4.17703e-11	41.7703			-9.53928	-3.46989e-11	-34.6989			9.53856	2.98267e-11	29.8267			-9.53784	-2.12628e-11	-21.2628
				0.461679	6.94368e-13								9.53568	2.58141e-11	25.8141			9.5368	8.21024e-11	82.1024			-9.53608	-3.07101e-11	-30.7101			9.53536	4.03529e-11	40.3529			-9.53696	-3.47287e-11	-34.7287			9.53624	3.13729e-11	31.3729			-9.53552	-2.18493e-11	-21.8493
				0.464	-1.41289e-13								9.53336	2.61253e-11	26.1253			9.53448	8.22907e-11	82.2907			-9.53376	-2.91521e-11	-29.1521			9.53304	3.89462e-11	38.9462			-9.53464	-3.30705e-11	-33.0705			9.53392	2.81411e-11	28.1411			-9.5332	-2.28971e-11	-22.8971
				0.466319	5.06017e-13								9.53104	2.60776e-11	26.0776			9.53216	8.14289e-11	81.4289			-9.53144	-3.04133e-11	-30.4133			9.53072	3.87197e-11	38.7197			-9.53232	-3.37404e-11	-33.7404			9.5316	2.93296e-11	29.3296			-9.53088	-2.05082e-11	-20.5082
				0.46864	2.47333e-13								9.52872	2.47329e-11	24.7329			9.52984	7.96097e-11	79.6097			-9.52912	-2.97374e-11	-29.7374			9.5284	3.93551e-11	39.3551			-9.53	-3.58564e-11	-35.8564			9.52928	3.02618e-11	30.2618			-9.52856	-1.96082e-11	-19.6082
				0.47096	7.31323e-13								9.5264	2.36803e-11	23.6803			9.52752	8.0325e-11	80.325			-9.5268	-2.886e-11	-28.86			9.52608	3.89045e-11	38.9045			-9.52768	-3.3595e-11	-33.595			9.52696	3.0418e-11	30.418			-9.52624	-2.02865e-11	-20.2865
				0.47328	1.19147e-12								9.52408	2.61694e-11	26.1694			9.5252	8.07291e-11	80.7291			-9.52448	-2.89172e-11	-28.9172			9.52376	3.93682e-11	39.3682			-9.52536	-3.537e-11	-35.37			9.52464	2.96586e-11	29.6586			-9.52392	-2.16884e-11	-21.6884
				0.475599	5.02441e-13								9.52176	2.34848e-11	23.4848			9.52288	7.93677e-11	79.3677			-9.52216	-2.80553e-11	-28.0553			9.52144	3.84682e-11	38.4682			-9.52304	-3.5097e-11	-35.097			9.52232	2.85452e-11	28.5452			-9.5216	-2.05344e-11	-20.5344
				0.47792	7.77815e-13								9.51944	2.4057e-11	24.057			9.52056	8.08924e-11	80.8924			-9.51984	-2.73305e-11	-27.3305			9.51912	3.90094e-11	39.0094			-9.52072	-3.51173e-11	-35.1173			9.52	3.02082e-11	30.2082			-9.51928	-2.24167e-11	-22.4167
				0.480241	-2.59306e-13								9.51712	2.50429e-11	25.0429			9.51824	8.20297e-11	82.0297			-9.51752	-2.74188e-11	-27.4188			9.5168	4.14198e-11	41.4198			-9.5184	-3.62939e-11	-36.2939			9.51768	3.02678e-11	30.2678			-9.51696	-1.99741e-11	-19.9741
				0.482559	1.6242e-12								9.5148	2.46089e-11	24.6089			9.51592	8.17805e-11	81.7805			-9.5152	-2.84165e-11	-28.4165			9.51448	3.87186e-11	38.7186			-9.51608	-3.43341e-11	-34.3341			9.51536	3.10975e-11	31.0975			-9.51464	-2.23989e-11	-22.3989
				0.48488	4.96481e-13								9.51248	2.48068e-11	24.8068			9.5136	7.98541e-11	79.8541			-9.51288	-2.90948e-11	-29.0948			9.51216	3.73429e-11	37.3429			-9.51376	-3.59339e-11	-35.9339			9.51304	2.99138e-11	29.9138			-9.51232	-1.99646e-11	-19.9646
				0.487199	-4.72691e-13								9.51016	2.40534e-11	24.0534			9.51128	7.99745e-11	79.9745			-9.51056	-3.16292e-11	-31.6292			9.50984	3.86673e-11	38.6673			-9.51144	-3.51447e-11	-35.1447			9.51072	2.91198e-11	29.1198			-9.51	-1.91742e-11	-19.1742
				0.48952	1.02458e-12								9.50784	2.57581e-11	25.7581			9.50896	8.14181e-11	81.4181			-9.50824	-3.18224e-11	-31.8224			9.50752	4.06378e-11	40.6378			-9.50912	-3.46285e-11	-34.6285			9.5084	3.17663e-11	31.7663			-9.50768	-1.795e-11	-17.95
				0.491838	1.21054e-12								9.50552	2.5348e-11	25.348			9.50664	8.07184e-11	80.7184			-9.50592	-3.02035e-11	-30.2035			9.5052	3.78972e-11	37.8972			-9.5068	-3.48145e-11	-34.8145			9.50608	3.18199e-11	31.8199			-9.50536	-1.85436e-11	-18.5436
				0.494159	1.49903e-12								9.5032	2.41893e-11	24.1893			9.50432	8.17936e-11	81.7936			-9.5036	-2.88779e-11	-28.8779			9.50288	3.84265e-11	38.4265			-9.50448	-3.43246e-11	-34.3246			9.50376	3.07601e-11	30.7601			-9.50304	-2.11007e-11	-21.1007
				0.49648	3.06938e-13								9.50088	2.52992e-11	25.2992			9.502	8.02785e-11	80.2785			-9.50128	-3.04932e-11	-30.4932			9.50056	3.97843e-11	39.7843			-9.50216	-3.4433e-11	-34.433			9.50144	2.85476e-11	28.5476			-9.50072	-2.11436e-11	-21.1436
				0.4988	1.2177e-12								9.49856	2.53683e-11	25.3683			9.49968	8.00639e-11	80.0639			-9.49896	-3.01212e-11	-30.1212			9.49824	3.90404e-11	39.0404			-9.49984	-3.43734e-11	-34.3734			9.49912	3.25101e-11	32.5101			-9.4984	-2.18588e-11	-21.8588
				0.501119	-2.85532e-13								9.49624	2.42048e-11	24.2048			9.49736	7.91448e-11	79.1448			-9.49664	-3.16888e-11	-31.6888			9.49592	3.82989e-11	38.2989			-9.49752	-3.72893e-11	-37.2893			9.4968	3.08543e-11	30.8543			-9.49608	-2.13892e-11	-21.3892
				0.50344	1.17955e-12								9.49392	2.59167e-11	25.9167			9.49504	7.99781e-11	79.9781			-9.49432	-3.01391e-11	-30.1391			9.4936	3.72964e-11	37.2964			-9.4952	-3.7145e-11	-37.145			9.49448	3.12525e-11	31.2525			-9.49376	-2.15692e-11	-21.5692
				0.50576	-9.13765e-13								9.4916	2.43622e-11	24.3622			9.49272	7.96216e-11	79.6216			-9.492	-2.95776e-11	-29.5776			9.49128	3.90249e-11	39.0249			-9.49288	-3.73119e-11	-37.3119			9.49216	3.1175e-11	31.175			-9.49144	-2.11853e-11	-21.1853
				0.50808	5.1913e-13								9.48928	2.56794e-11	25.6794			9.4904	7.94118e-11	79.4118			-9.48968	-2.93392e-11	-29.3392			9.48896	3.82811e-11	38.2811			-9.49056	-3.36665e-11	-33.6665			9.48984	3.20428e-11	32.0428			-9.48912	-2.2412e-11	-22.412
				0.510401	5.69198e-13								9.48696	2.79647e-11	27.9647			9.48808	7.9723e-11	79.723			-9.48736	-2.99734e-11	-29.9734			9.48664	4.0285e-11	40.285			-9.48824	-3.42447e-11	-34.2447			9.48752	2.9034e-11	29.034			-9.4868	-2.05392e-11	-20.5392
				0.512719	5.56085e-13								9.48464	2.64841e-11	26.4841			9.48576	8.00627e-11	80.0627			-9.48504	-2.96587e-11	-29.6587			9.48432	3.91417e-11	39.1417			-9.48592	-3.3384e-11	-33.384			9.4852	3.13323e-11	31.3323			-9.48448	-2.07788e-11	-20.7788
				0.51504	5.56085e-13								9.48232	2.4119e-11	24.119			9.48344	7.96944e-11	79.6944			-9.48272	-2.71029e-11	-27.1029			9.482	3.82608e-11	38.2608			-9.4836	-3.39943e-11	-33.9943			9.48288	3.12572e-11	31.2572			-9.48216	-2.1084e-11	-21.084
				0.517359	5.28667e-13								9.48	2.52491e-11	25.2491			9.48112	7.98696e-11	79.8696			-9.4804	-2.87539e-11	-28.7539			9.47968	3.7772e-11	37.772			-9.48128	-3.43448e-11	-34.3448			9.48056	3.23313e-11	32.3313			-9.47984	-2.05368e-11	-20.5368
				0.51968	-8.14822e-13								9.47768	2.46852e-11	24.6852			9.4788	7.94893e-11	79.4893			-9.47808	-3.04622e-11	-30.4622			9.47736	3.85469e-11	38.5469			-9.47896	-3.40098e-11	-34.0098			9.47824	2.79969e-11	27.9969			-9.47752	-2.23309e-11	-22.3309
				0.521998	1.56817e-12								9.47536	2.4572e-11	24.572			9.47648	7.88063e-11	78.8063			-9.47576	-2.86919e-11	-28.6919			9.47504	3.83144e-11	38.3144			-9.47664	-3.59112e-11	-35.9112			9.47592	3.01629e-11	30.1629			-9.4752	-2.0178e-11	-20.178
				0.524319	2.75943e-13								9.47304	2.65175e-11	26.5175			9.47416	7.77715e-11	77.7715			-9.47344	-2.91533e-11	-29.1533			9.47272	3.96877e-11	39.6877			-9.47432	-3.55894e-11	-35.5894			9.4736	2.8128e-11	28.128			-9.47288	-2.01541e-11	-20.1541
				0.526639	-6.87268e-13								9.47072	2.39652e-11	23.9652			9.47184	7.91675e-11	79.1675			-9.47112	-2.98864e-11	-29.8864			9.4704	4.07666e-11	40.7666			-9.472	-3.32588e-11	-33.2588			9.47128	3.04371e-11	30.4371			-9.47056	-2.13546e-11	-21.3546
				0.52896	-4.94149e-13								9.4684	2.52229e-11	25.2229			9.46952	7.78252e-11	77.8252			-9.4688	-2.94322e-11	-29.4322			9.46808	3.94803e-11	39.4803			-9.46968	-3.52949e-11	-35.2949			9.46896	2.87717e-11	28.7717			-9.46824	-2.12473e-11	-21.2473
				0.53128	5.8708e-13								9.46608	2.52956e-11	25.2956			9.4672	8.06552e-11	80.6552			-9.46648	-3.01415e-11	-30.1415			9.46576	4.02122e-11	40.2122			-9.46736	-3.46762e-11	-34.6762			9.46664	2.76893e-11	27.6893			-9.46592	-2.26647e-11	-22.6647
				0.5336	2.87864e-13								9.46376	2.60228e-11	26.0228			9.46488	7.90375e-11	79.0375			-9.46416	-3.02857e-11	-30.2857			9.46344	3.99583e-11	39.9583			-9.46504	-3.40015e-11	-34.0015			9.46432	3.01093e-11	30.1093			-9.4636	-2.03461e-11	-20.3461
				0.535918	1.24511e-12								9.46144	2.52467e-11	25.2467			9.46256	7.82758e-11	78.2758			-9.46184	-3.06231e-11	-30.6231			9.46112	3.89963e-11	38.9963			-9.46272	-3.24041e-11	-32.4041			9.462	2.86346e-11	28.6346			-9.46128	-2.06441e-11	-20.6441
				0.538239	4.78599e-13								9.45912	2.47723e-11	24.7723			9.46024	7.98422e-11	79.8422			-9.45952	-2.87134e-11	-28.7134			9.4588	3.84074e-11	38.4074			-9.4604	-3.36069e-11	-33.6069			9.45968	2.95311e-11	29.5311			-9.45896	-2.01613e-11	-20.1613
				0.54056	-6.49951e-14								9.4568	2.43252e-11	24.3252			9.45792	7.93618e-11	79.3618			-9.4572	-2.85644e-11	-28.5644			9.45648	3.83335e-11	38.3335			-9.45808	-3.37905e-11	-33.7905			9.45736	3.0877e-11	30.877			-9.45664	-1.96654e-11	-19.6654
				0.542879	1.87729e-13								9.45448	2.33549e-11	23.3549			9.4556	7.93796e-11	79.3796			-9.45488	-2.89029e-11	-28.9029			9.45416	3.82966e-11	38.2966			-9.45576	-3.44545e-11	-34.4545			9.45504	2.8823e-11	28.823			-9.45432	-2.12258e-11	-21.2258
				0.5452	9.75702e-13								9.45216	2.38448e-11	23.8448			9.45328	7.82603e-11	78.2603			-9.45256	-2.97386e-11	-29.7386			9.45184	3.83204e-11	38.3204			-9.45344	-3.44819e-11	-34.4819			9.45272	2.79397e-11	27.9397			-9.452	-2.23583e-11	-22.3583
				0.547519	3.8717e-14								9.44984	2.38794e-11	23.8794			9.45096	7.87514e-11	78.7514			-9.45024	-3.00175e-11	-30.0175			9.44952	3.75217e-11	37.5217			-9.45112	-3.27856e-11	-32.7856			9.4504	2.95847e-11	29.5847			-9.44968	-2.10113e-11	-21.0113
				0.54984	1.11756e-12								9.44752	2.41726e-11	24.1726			9.44864	7.89743e-11	78.9743			-9.44792	-2.9009e-11	-29.009			9.4472	3.80975e-11	38.0975			-9.4488	-3.21955e-11	-32.1955			9.44808	3.09223e-11	30.9223			-9.44736	-1.98692e-11	-19.8692
				0.552158	4.07074e-13								9.4452	2.51335e-11	25.1335			9.44632	7.81148e-11	78.1148			-9.4456	-2.98757e-11	-29.8757			9.44488	3.92586e-11	39.2586			-9.44648	-3.32183e-11	-33.2183			9.44576	3.04013e-11	30.4013			-9.44504	-2.11245e-11	-21.1245
				0.554481	-8.61313e-13								9.44288	2.61551e-11	26.1551			9.444	7.94822e-11	79.4822			-9.44328	-2.75666e-11	-27.5666			9.44256	3.85278e-11	38.5278			-9.44416	-3.48085e-11	-34.8085			9.44344	2.68787e-11	26.8787			-9.44272	-2.19649e-11	-21.9649
				0.5568	-1.00079e-12								9.44056	2.59155e-11	25.9155			9.44168	7.91424e-11	79.1424			-9.44096	-2.82294e-11	-28.2294			9.44024	3.82262e-11	38.2262			-9.44184	-3.40516e-11	-34.0516			9.44112	2.96479e-11	29.6479			-9.4404	-2.28817e-11	-22.8817
				0.55912	8.75928e-14								9.43824	2.4715e-11	24.715			9.43936	7.90685e-11	79.0685			-9.43864	-3.10272e-11	-31.0272			9.43792	3.97438e-11	39.7438			-9.43952	-3.19189e-11	-31.9189			9.4388	2.86847e-11	28.6847			-9.43808	-2.00218e-11	-20.0218
				0.561439	1.80659e-12								9.43592	2.42561e-11	24.2561			9.43704	8.06099e-11	80.6099			-9.43632	-3.09533e-11	-30.9533			9.4356	3.98463e-11	39.8463			-9.4372	-3.34615e-11	-33.4615			9.43648	2.90066e-11	29.0066			-9.43576	-2.10351e-11	-21.0351
				0.56376	1.91626e-12								9.4336	2.36374e-11	23.6374			9.43472	8.13514e-11	81.3514			-9.434	-3.05587e-11	-30.5587			9.43328	3.84754e-11	38.4754			-9.43488	-3.28404e-11	-32.8404			9.43416	2.99245e-11	29.9245			-9.43344	-1.98418e-11	-19.8418
				0.56608	1.70884e-12								9.43128	2.34347e-11	23.4347			9.4324	7.81923e-11	78.1923			-9.43168	-2.97028e-11	-29.7028			9.43096	4.01681e-11	40.1681			-9.43256	-3.11643e-11	-31.1643			9.43184	3.06588e-11	30.6588			-9.43112	-2.11615e-11	-21.1615
				0.568399	8.67221e-13								9.42896	2.41154e-11	24.1154			9.43008	7.80743e-11	78.0743			-9.42936	-3.03513e-11	-30.3513			9.42864	3.97807e-11	39.7807			-9.43024	-3.39538e-11	-33.9538			9.42952	2.9059e-11	29.059			-9.4288	-1.94532e-11	-19.4532
				0.57072	1.08895e-12								9.42664	2.47115e-11	24.7115			9.42776	7.87729e-11	78.7729			-9.42704	-2.99853e-11	-29.9853			9.42632	3.87317e-11	38.7317			-9.42792	-3.2689e-11	-32.689			9.4272	2.82198e-11	28.2198			-9.42648	-2.1928e-11	-21.928
				0.573039	8.2073e-13								9.42432	2.44313e-11	24.4313			9.42544	7.94428e-11	79.4428			-9.42472	-2.90567e-11	-29.0567			9.424	3.83967e-11	38.3967			-9.4256	-3.30073e-11	-33.0073			9.42488	2.92641e-11	29.2641			-9.42416	-2.27219e-11	-22.7219
				0.57536	1.11637e-12								9.422	2.44945e-11	24.4945			9.42312	7.76618e-11	77.6618			-9.4224	-3.00402e-11	-30.0402			9.42168	3.72749e-11	37.2749			-9.42328	-3.30287e-11	-33.0287			9.42256	2.88433e-11	28.8433			-9.42184	-2.12819e-11	-21.2819
				0.577679	7.42052e-13								9.41968	2.27409e-11	22.7409			9.4208	7.67034e-11	76.7034			-9.42008	-2.63649e-11	-26.3649			9.41936	3.79747e-11	37.9747			-9.42096	-3.40921e-11	-34.0921			9.42024	2.89219e-11	28.9219			-9.41952	-2.114e-11	-21.14
				0.58	4.35684e-13								9.41736	2.27362e-11	22.7362			9.41848	7.97146e-11	79.7146			-9.41776	-2.86836e-11	-28.6836			9.41704	3.80796e-11	38.0796			-9.41864	-3.28559e-11	-32.8559			9.41792	2.83354e-11	28.3354			-9.4172	-2.1295e-11	-21.295
				0.582318	8.87487e-13								9.41504	2.50917e-11	25.0917			9.41616	8.06456e-11	80.6456			-9.41544	-3.17317e-11	-31.7317			9.41472	3.98928e-11	39.8928			-9.41632	-3.26413e-11	-32.6413			9.4156	2.9729e-11	29.729			-9.41488	-2.09552e-11	-20.9552
				0.584641	7.31323e-13								9.41272	2.60824e-11	26.0824			9.41384	7.74175e-11	77.4175			-9.41312	-2.94692e-11	-29.4692			9.4124	3.84372e-11	38.4372			-9.414	-3.24506e-11	-32.4506			9.41328	2.93416e-11	29.3416			-9.41256	-2.3306e-11	-23.306
				0.586959	7.86159e-13								9.4104	2.48593e-11	24.8593			9.41152	7.85058e-11	78.5058			-9.4108	-2.9077e-11	-29.077			9.41008	3.93742e-11	39.3742			-9.41168	-3.16268e-11	-31.6268			9.41096	3.15565e-11	31.5565			-9.41024	-1.99908e-11	-19.9908
				0.58928	-1.79436e-13								9.40808	2.30044e-11	23.0044			9.4092	7.72804e-11	77.2804			-9.40848	-2.70373e-11	-27.0373			9.40776	3.71343e-11	37.1343			-9.40936	-3.22849e-11	-32.2849			9.40864	2.94989e-11	29.4989			-9.40792	-1.97846e-11	-19.7846
				0.5916	4.15418e-13								9.40576	2.536e-11	25.36			9.40688	7.76952e-11	77.6952			-9.40616	-2.91616e-11	-29.1616			9.40544	3.74788e-11	37.4788			-9.40704	-3.2149e-11	-32.149			9.40632	2.97004e-11	29.7004			-9.4056	-1.75363e-11	-17.5363
				0.59392	2.97723e-12								9.40344	2.49558e-11	24.9558			9.40456	8.01736e-11	80.1736			-9.40384	-3.04133e-11	-30.4133			9.40312	3.76492e-11	37.6492			-9.40472	-3.12287e-11	-31.2287			9.404	3.03465e-11	30.3465			-9.40328	-1.89322e-11	-18.9322
				0.596238	1.78752e-12								9.40112	2.36553e-11	23.6553			9.40224	7.94166e-11	79.4166			-9.40152	-3.18414e-11	-31.8414			9.4008	3.85958e-11	38.5958			-9.4024	-3.18307e-11	-31.8307			9.40168	2.79647e-11	27.9647			-9.40096	-1.85746e-11	-18.5746
				0.598559	1.86023e-12								9.3988	2.39414e-11	23.9414			9.39992	8.0567e-11	80.567			-9.3992	-3.06267e-11	-30.6267			9.39848	3.89248e-11	38.9248			-9.40008	-3.31563e-11	-33.1563			9.39936	2.98482e-11	29.8482			-9.39864	-1.84638e-11	-18.4638
				0.60088	8.40995e-13								9.39648	2.36124e-11	23.6124			9.3976	7.94512e-11	79.4512			-9.39688	-2.80124e-11	-28.0124			9.39616	3.84396e-11	38.4396			-9.39776	-3.36308e-11	-33.6308			9.39704	2.95597e-11	29.5597			-9.39632	-1.85162e-11	-18.5162
				0.603199	8.68414e-13								9.39416	2.32643e-11	23.2643			9.39528	7.68453e-11	76.8453			-9.39456	-2.86454e-11	-28.6454			9.39384	3.92204e-11	39.2204			-9.39544	-3.27426e-11	-32.7426			9.39472	2.92521e-11	29.2521			-9.394	-2.06632e-11	-20.6632
				0.60552	1.34763e-12								9.39184	2.45613e-11	24.5613			9.39296	7.82877e-11	78.2877			-9.39224	-2.92987e-11	-29.2987			9.39152	3.96257e-11	39.6257			-9.39312	-3.26139e-11	-32.6139			9.3924	2.98005e-11	29.8005			-9.39168	-2.029e-11	-20.29
				0.607839	6.55029e-13								9.38952	2.34169e-11	23.4169			9.39064	7.6248e-11	76.248			-9.38992	-2.81543e-11	-28.1543			9.3892	3.75777e-11	37.5777			-9.3908	-3.31027e-11	-33.1027			9.39008	3.08686e-11	30.8686			-9.38936	-2.18469e-11	-21.8469
				0.61016	3.70119e-13								9.3872	2.37328e-11	23.7328			9.38832	7.73746e-11	77.3746			-9.3876	-2.8736e-11	-28.736			9.38688	3.86685e-11	38.6685			-9.38848	-3.12716e-11	-31.2716			9.38776	3.02964e-11	30.2964			-9.38704	-2.20853e-11	-22.0853
				0.612478	6.19266e-13								9.38488	2.3722e-11	23.722			9.386	7.77405e-11	77.7405			-9.38528	-2.84964e-11	-28.4964			9.38456	3.9255e-11	39.255			-9.38616	-3.01987e-11	-30.1987			9.38544	2.99829e-11	29.9829			-9.38472	-2.16562e-11	-21.6562
				0.6148	4.17802e-13								9.38256	2.33036e-11	23.3036			9.38368	7.62099e-11	76.2099			-9.38296	-2.89518e-11	-28.9518			9.38224	3.96472e-11	39.6472			-9.38384	-3.09354e-11	-30.9354			9.38312	2.99507e-11	29.9507			-9.3824	-2.17206e-11	-21.7206
				0.61712	6.34763e-13								9.38024	2.31629e-11	23.1629			9.38136	7.81673e-11	78.1673			-9.38064	-2.76e-11	-27.6			9.37992	4.00918e-11	40.0918			-9.38152	-3.00247e-11	-30.0247			9.3808	3.14063e-11	31.4063			-9.38008	-2.12175e-11	-21.2175
				0.61944	-6.44352e-13								9.37792	2.49892e-11	24.9892			9.37904	8.01474e-11	80.1474			-9.37832	-2.81006e-11	-28.1006			9.3776	4.05889e-11	40.5889			-9.3792	-2.9735e-11	-29.735			9.37848	2.87014e-11	28.7014			-9.37776	-2.13045e-11	-21.3045
				0.621759	-1.80068e-12								9.3756	2.3455e-11	23.455			9.37672	7.82686e-11	78.2686			-9.376	-2.98518e-11	-29.8518			9.37528	3.64321e-11	36.4321			-9.37688	-3.03489e-11	-30.3489			9.37616	2.83009e-11	28.3009			-9.37544	-2.20996e-11	-22.0996
				0.62408	-6.89652e-13								9.37328	2.21663e-11	22.1663			9.3744	7.92676e-11	79.2676			-9.37368	-2.78515e-11	-27.8515			9.37296	3.91465e-11	39.1465			-9.37456	-2.95049e-11	-29.5049			9.37384	2.96682e-11	29.6682			-9.37312	-2.17921e-11	-21.7921
				0.6264	7.53973e-13								9.37096	2.15333e-11	21.5333			9.37208	7.7179e-11	77.179			-9.37136	-2.91616e-11	-29.1616			9.37064	3.84623e-11	38.4623			-9.37224	-3.1206e-11	-31.206			9.37152	2.89637e-11	28.9637			-9.3708	-2.2642e-11	-22.642
				0.628719	1.12591e-12								9.36864	2.39247e-11	23.9247			9.36976	7.74198e-11	77.4198			-9.36904	-2.98745e-11	-29.8745			9.36832	3.83895e-11	38.3895			-9.36992	-3.20119e-11	-32.0119			9.3692	3.14432e-11	31.4432			-9.36848	-2.00647e-11	-20.0647
				0.63104	-2.5374e-12								9.36632	2.26277e-11	22.6277			9.36744	7.8097e-11	78.097			-9.36672	-2.92319e-11	-29.2319			9.366	3.6543e-11	36.543			-9.3676	-3.12811e-11	-31.2811			9.36688	2.93296e-11	29.3296			-9.36616	-2.12759e-11	-21.2759
				0.633359	-6.12166e-13								9.364	2.46137e-11	24.6137			9.36512	7.70694e-11	77.0694			-9.3644	-2.98244e-11	-29.8244			9.36368	3.68315e-11	36.8315			-9.36528	-3.18235e-11	-31.8235			9.36456	3.00699e-11	30.0699			-9.36384	-2.13236e-11	-21.3236
				0.63568	-3.2964e-13								9.36168	2.38079e-11	23.8079			9.3628	7.70479e-11	77.0479			-9.36208	-2.82175e-11	-28.2175			9.36136	3.84885e-11	38.4885			-9.36296	-3.15792e-11	-31.5792			9.36224	2.91902e-11	29.1902			-9.36152	-2.07609e-11	-20.7609
				0.637999	2.3478e-12								9.35936	2.32094e-11	23.2094			9.36048	7.72792e-11	77.2792			-9.35976	-2.69765e-11	-26.9765			9.35904	3.76814e-11	37.6814			-9.36064	-3.34412e-11	-33.4412			9.35992	2.80982e-11	28.0982			-9.3592	-2.18517e-11	-21.8517
				0.64032	-9.83737e-14								9.35704	2.54076e-11	25.4076			9.35816	7.53218e-11	75.3218			-9.35744	-2.80267e-11	-28.0267			9.35672	3.76802e-11	37.6802			-9.35832	-3.26449e-11	-32.6449			9.3576	2.71719e-11	27.1719			-9.35688	-2.22773e-11	-22.2773
				0.642641	-1.95685e-12								9.35472	2.54446e-11	25.4446			9.35584	7.71671e-11	77.1671			-9.35512	-2.73496e-11	-27.3496			9.3544	3.81666e-11	38.1666			-9.356	-3.27832e-11	-32.7832			9.35528	2.71553e-11	27.1553			-9.35456	-2.14261e-11	-21.4261
				0.64496	-2.8434e-13								9.3524	2.26968e-11	22.6968			9.35352	7.88146e-11	78.8146			-9.3528	-2.81936e-11	-28.1936			9.35208	3.87972e-11	38.7972			-9.35368	-3.18581e-11	-31.8581			9.35296	2.87884e-11	28.7884			-9.35224	-2.17396e-11	-21.7396
				0.647279	3.02968e-12								9.35008	2.25264e-11	22.5264			9.3512	7.56353e-11	75.6353			-9.35048	-2.86573e-11	-28.6573			9.34976	3.80248e-11	38.0248			-9.35136	-3.25138e-11	-32.5138			9.35064	2.87646e-11	28.7646			-9.34992	-2.12509e-11	-21.2509
				0.6496	2.61125e-12								9.34776	2.21127e-11	22.1127			9.34888	7.80838e-11	78.0838			-9.34816	-2.86967e-11	-28.6967			9.34744	3.89307e-11	38.9307			-9.34904	-3.1547e-11	-31.547			9.34832	2.98255e-11	29.8255			-9.3476	-2.13033e-11	-21.3033
				0.65192	2.94862e-12								9.34544	2.38079e-11	23.8079			9.34656	7.7787e-11	77.787			-9.34584	-3.02524e-11	-30.2524			9.34512	3.87698e-11	38.7698			-9.34672	-3.17115e-11	-31.7115			9.346	2.94739e-11	29.4739			-9.34528	-2.09397e-11	-20.9397
				0.65424	2.49681e-12								9.34312	2.27815e-11	22.7815			9.34424	7.79408e-11	77.9408			-9.34352	-3.10952e-11	-31.0952			9.3428	3.6878e-11	36.878			-9.3444	-3.12525e-11	-31.2525			9.34368	2.62576e-11	26.2576			-9.34296	-2.12866e-11	-21.2866
				0.656558	2.79603e-12								9.3408	2.3995e-11	23.995			9.34192	7.84546e-11	78.4546			-9.3412	-3.01379e-11	-30.1379			9.34048	3.81356e-11	38.1356			-9.34208	-3.17711e-11	-31.7711			9.34136	2.84499e-11	28.4499			-9.34064	-2.33096e-11	-23.3096
				0.658879	1.78156e-12								9.33848	2.35241e-11	23.5241			9.3396	7.80016e-11	78.0016			-9.33888	-2.9375e-11	-29.375			9.33816	3.83264e-11	38.3264			-9.33976	-3.07805e-11	-30.7805			9.33904	2.75761e-11	27.5761			-9.33832	-2.27589e-11	-22.7589
				0.6612	1.18313e-12								9.33616	2.35086e-11	23.5086			9.33728	7.70205e-11	77.0205			-9.33656	-2.71374e-11	-27.1374			9.33584	3.71772e-11	37.1772			-9.33744	-3.04467e-11	-30.4467			9.33672	2.83676e-11	28.3676			-9.336	-2.12366e-11	-21.2366
				0.663519	-2.7838e-13								9.33384	2.49403e-11	24.9403			9.33496	7.64173e-11	76.4173			-9.33424	-2.65378e-11	-26.5378			9.33352	3.79973e-11	37.9973			-9.33512	-3.20596e-11	-32.0596			9.3344	2.80267e-11	28.0267			-9.33368	-1.98323e-11	-19.8323
				0.66584	-1.07351e-12								9.33152	2.32869e-11	23.2869			9.33264	7.65603e-11	76.5603			-9.33192	-2.67118e-11	-26.7118			9.3312	3.6115e-11	36.115			-9.3328	-3.18986e-11	-31.8986			9.33208	2.99209e-11	29.9209			-9.33136	-2.09004e-11	-20.9004
				0.668159	9.63781e-13								9.3292	2.38913e-11	23.8913			9.33032	7.83473e-11	78.3473			-9.3296	-2.72399e-11	-27.2399			9.32888	3.71557e-11	37.1557			-9.33048	-3.1206e-11	-31.206			9.32976	2.94882e-11	29.4882			-9.32904	-2.04724e-11	-20.4724
				0.67048	-6.95612e-13								9.32688	2.37637e-11	23.7637			9.328	8.03393e-11	80.3393			-9.32728	-2.765e-11	-27.65			9.32656	3.70794e-11	37.0794			-9.32816	-3.03966e-11	-30.3966			9.32744	2.86394e-11	28.6394			-9.32672	-2.0079e-11	-20.079
				0.672799	1.15011e-13								9.32456	2.36505e-11	23.6505			9.32568	7.80958e-11	78.0958			-9.32496	-2.7327e-11	-27.327			9.32424	3.86518e-11	38.6518			-9.32584	-3.007e-11	-30.07			9.32512	2.6924e-11	26.924			-9.3244	-1.88631e-11	-18.8631
				0.67512	-1.83406e-12								9.32224	2.24751e-11	22.4751			9.32336	7.56901e-11	75.6901			-9.32264	-2.82818e-11	-28.2818			9.32192	3.98785e-11	39.8785			-9.32352	-3.03811e-11	-30.3811			9.3228	2.81626e-11	28.1626			-9.32208	-1.85019e-11	-18.5019
				0.67744	-8.78002e-13								9.31992	2.43717e-11	24.3717			9.32104	7.75355e-11	77.5355			-9.32032	-2.7811e-11	-27.811			9.3196	3.68434e-11	36.8434			-9.3212	-2.88505e-11	-28.8505			9.32048	2.88325e-11	28.8325			-9.31976	-2.23834e-11	-22.3834
				0.67976	-2.01884e-12								9.3176	2.29305e-11	22.9305			9.31872	7.70122e-11	77.0122			-9.318	-2.69515e-11	-26.9515			9.31728	3.64321e-11	36.4321			-9.31888	-2.98649e-11	-29.8649			9.31816	2.83879e-11	28.3879			-9.31744	-2.19435e-11	-21.9435
				0.682079	1.20458e-12								9.31528	2.38901e-11	23.8901			9.3164	7.58177e-11	75.8177			-9.31568	-2.98912e-11	-29.8912			9.31496	3.62402e-11	36.2402			-9.31656	-3.0511e-11	-30.511			9.31584	2.60228e-11	26.0228			-9.31512	-2.16228e-11	-21.6228
				0.6844	2.06527e-12								9.31296	2.40713e-11	24.0713			9.31408	7.69061e-11	76.9061			-9.31336	-2.93058e-11	-29.3058			9.31264	3.7995e-11	37.995			-9.31424	-2.93762e-11	-29.3762			9.31352	2.78824e-11	27.8824			-9.3128	-2.2046e-11	-22.046
				0.686719	1.25823e-12								9.31064	2.379e-11	23.79			9.31176	7.53969e-11	75.3969			-9.31104	-2.98804e-11	-29.8804			9.31032	4.0031e-11	40.031			-9.31192	-2.92617e-11	-29.2617			9.3112	2.80326e-11	28.0326			-9.31048	-2.0786e-11	-20.786
				0.689039	1.9401e-12								9.30832	2.28137e-11	22.8137			9.30944	7.5342e-11	75.342			-9.30872	-2.93309e-11	-29.3309			9.308	3.89713e-11	38.9713			-9.3096	-2.86073e-11	-28.6073			9.30888	2.99436e-11	29.9436			-9.30816	-2.01518e-11	-20.1518
				0.69136	2.23217e-12								9.306	2.22975e-11	22.2975			9.30712	7.49737e-11	74.9737			-9.3064	-2.79337e-11	-27.9337			9.30568	3.78376e-11	37.8376			-9.30728	-3.03895e-11	-30.3895			9.30656	2.99948e-11	29.9948			-9.30584	-2.10351e-11	-21.0351
				0.693679	3.24068e-12								9.30368	2.43455e-11	24.3455			9.3048	7.62754e-11	76.2754			-9.30408	-2.89732e-11	-28.9732			9.30336	3.84706e-11	38.4706			-9.30496	-2.97445e-11	-29.7445			9.30424	2.83307e-11	28.3307			-9.30352	-2.02769e-11	-20.2769
				0.696	1.6099e-12								9.30136	2.49594e-11	24.9594			9.30248	7.70789e-11	77.0789			-9.30176	-2.68644e-11	-26.8644			9.30104	3.73918e-11	37.3918			-9.30264	-2.82377e-11	-28.2377			9.30192	2.79492e-11	27.9492			-9.3012	-2.11674e-11	-21.1674
				0.698318	7.86159e-13								9.29904	2.40558e-11	24.0558			9.30016	7.52121e-11	75.2121			-9.29944	-2.71207e-11	-27.1207			9.29872	3.82679e-11	38.2679			-9.30032	-2.98912e-11	-29.8912			9.2996	3.02595e-11	30.2595			-9.29888	-2.09791e-11	-20.9791
				0.700639	1.8296e-13								9.29672	2.17706e-11	21.7706			9.29784	7.5199e-11	75.199			-9.29712	-2.78753e-11	-27.8753			9.2964	4.05389e-11	40.5389			-9.298	-2.92892e-11	-29.2892			9.29728	2.98363e-11	29.8363			-9.29656	-2.15155e-11	-21.5155
				0.70296	7.93312e-13								9.2944	2.45708e-11	24.5708			9.29552	7.54934e-11	75.4934			-9.2948	-2.76882e-11	-27.6882			9.29408	3.88473e-11	38.8473			-9.29568	-2.89244e-11	-28.9244			9.29496	2.8407e-11	28.407			-9.29424	-2.08539e-11	-20.8539
				0.70528	8.80335e-13								9.29208	2.46995e-11	24.6995			9.2932	7.2295e-11	72.295			-9.29248	-2.89923e-11	-28.9923			9.29176	3.80379e-11	38.0379			-9.29336	-3.13622e-11	-31.3622			9.29264	2.82472e-11	28.2472			-9.29192	-2.17086e-11	-21.7086
				0.707599	6.45492e-13								9.28976	2.34776e-11	23.4776			9.29088	7.54577e-11	75.4577			-9.29016	-2.83689e-11	-28.3689			9.28944	3.70639e-11	37.0639			-9.29104	-3.0058e-11	-30.058			9.29032	2.80386e-11	28.0386			-9.2896	-2.16574e-11	-21.6574
				0.70992	-9.65025e-13								9.28744	2.32464e-11	23.2464			9.28856	7.49319e-11	74.9319			-9.28784	-2.83426e-11	-28.3426			9.28712	3.77267e-11	37.7267			-9.28872	-3.00449e-11	-30.0449			9.288	2.84403e-11	28.4403			-9.28728	-2.27994e-11	-22.7994
				0.71224	-8.94692e-13								9.28512	2.38925e-11	23.8925			9.28624	7.40975e-11	74.0975			-9.28552	-2.84797e-11	-28.4797			9.2848	3.75884e-11	37.5884			-9.2864	-2.99126e-11	-29.9126			9.28568	2.85262e-11	28.5262			-9.28496	-2.15036e-11	-21.5036
				0.71456	4.97673e-13								9.2828	2.40355e-11	24.0355			9.28392	7.51632e-11	75.1632			-9.2832	-2.75797e-11	-27.5797			9.28248	3.70902e-11	37.0902			-9.28408	-2.76047e-11	-27.6047			9.28336	3.0418e-11	30.418			-9.28264	-1.9911e-11	-19.911
				0.716881	-4.17855e-13								9.28048	2.37983e-11	23.7983			9.2816	7.62027e-11	76.2027			-9.28088	-2.78038e-11	-27.8038			9.28016	3.69733e-11	36.9733			-9.28176	-2.91783e-11	-29.1783			9.28104	2.80946e-11	28.0946			-9.28032	-2.01255e-11	-20.1255
				0.719199	1.11637e-12								9.27816	2.32404e-11	23.2404			9.27928	7.57068e-11	75.7068			-9.27856	-2.86597e-11	-28.6597			9.27784	3.7511e-11	37.511			-9.27944	-2.96492e-11	-29.6492			9.27872	2.86895e-11	28.6895			-9.278	-2.02292e-11	-20.2292
				0.72152	-2.37849e-13								9.27584	2.54005e-11	25.4005			9.27696	7.41225e-11	74.1225			-9.27624	-2.9425e-11	-29.425			9.27552	3.70472e-11	37.0472			-9.27712	-2.98018e-11	-29.8018			9.2764	2.84809e-11	28.4809			-9.27568	-2.18386e-11	-21.8386
				0.723839	-1.95804e-12								9.27352	2.40546e-11	24.0546			9.27464	7.48104e-11	74.8104			-9.27392	-2.87873e-11	-28.7873			9.2732	3.72106e-11	37.2106			-9.2748	-3.02738e-11	-30.2738			9.27408	2.99924e-11	29.9924			-9.27336	-2.12342e-11	-21.2342
				0.72616	3.15282e-13								9.2712	2.36243e-11	23.6243			9.27232	7.61658e-11	76.1658			-9.2716	-2.64007e-11	-26.4007			9.27088	3.86053e-11	38.6053			-9.27248	-2.87968e-11	-28.7968			9.27176	2.91866e-11	29.1866			-9.27104	-2.14166e-11	-21.4166
				0.728478	3.12385e-12								9.26888	2.44099e-11	24.4099			9.27	7.40677e-11	74.0677			-9.26928	-2.89887e-11	-28.9887			9.26856	3.76004e-11	37.6004			-9.27016	-2.78324e-11	-27.8324			9.26944	2.73376e-11	27.3376			-9.26872	-2.14166e-11	-21.4166
				0.730799	-2.60498e-13								9.26656	2.47079e-11	24.7079			9.26768	7.54565e-11	75.4565			-9.26696	-2.8463e-11	-28.463			9.26624	3.85588e-11	38.5588			-9.26784	-2.90233e-11	-29.0233			9.26712	2.81673e-11	28.1673			-9.2664	-2.22212e-11	-22.2212
				0.733119	2.51469e-12								9.26424	2.28399e-11	22.8399			9.26536	7.73424e-11	77.3424			-9.26464	-2.69598e-11	-26.9598			9.26392	3.65585e-11	36.5585			-9.26552	-2.83724e-11	-28.3724			9.2648	2.95299e-11	29.5299			-9.26408	-2.26289e-11	-22.6289
				0.73544	7.68639e-14								9.26192	2.17098e-11	21.7098			9.26304	7.40128e-11	74.0128			-9.26232	-2.64985e-11	-26.4985			9.2616	3.8709e-11	38.709			-9.2632	-2.87122e-11	-28.7122			9.26248	2.9909e-11	29.909			-9.26176	-2.28495e-11	-22.8495
				0.73776	9.08945e-13								9.2596	2.33727e-11	23.3727			9.26072	7.60549e-11	76.0549			-9.26	-3.02595e-11	-30.2595			9.25928	3.8436e-11	38.436			-9.26088	-2.9282e-11	-29.282			9.26016	2.97922e-11	29.7922			-9.25944	-2.14488e-11	-21.4488
				0.74008	1.15094e-12								9.25728	2.41178e-11	24.1178			9.2584	7.4467e-11	74.467			-9.25768	-2.81734e-11	-28.1734			9.25696	3.73107e-11	37.3107			-9.25856	-2.90758e-11	-29.0758			9.25784	3.10296e-11	31.0296			-9.25712	-2.09338e-11	-20.9338
				0.742399	4.60718e-13								9.25496	2.37113e-11	23.7113			9.25608	7.46041e-11	74.6041			-9.25536	-2.8351e-11	-28.351			9.25464	3.84682e-11	38.4682			-9.25624	-3.03084e-11	-30.3084			9.25552	2.95406e-11	29.5406			-9.2548	-2.13117e-11	-21.3117
				0.74472	1.32618e-12								9.25264	2.37912e-11	23.7912			9.25376	7.62337e-11	76.2337			-9.25304	-2.9729e-11	-29.729			9.25232	3.92991e-11	39.2991			-9.25392	-2.99126e-11	-29.9126			9.2532	3.12966e-11	31.2966			-9.25248	-1.93304e-11	-19.3304
				0.747041	2.47297e-12								9.25032	2.35146e-11	23.5146			9.25144	7.44325e-11	74.4325			-9.25072	-2.67369e-11	-26.7369			9.25	3.69423e-11	36.9423			-9.2516	-3.09831e-11	-30.9831			9.25088	2.96658e-11	29.6658			-9.25016	-2.01577e-11	-20.1577
				0.749359	1.35956e-12								9.248	2.5019e-11	25.019			9.24912	7.61324e-11	76.1324			-9.2484	-2.92021e-11	-29.2021			9.24768	3.90821e-11	39.0821			-9.24928	-2.87742e-11	-28.7742			9.24856	2.98637e-11	29.8637			-9.24784	-2.1891e-11	-21.891
				0.75168	1.01504e-12								9.24568	2.27064e-11	22.7064			9.2468	7.68453e-11	76.8453			-9.24608	-2.99126e-11	-29.9126			9.24536	3.80796e-11	38.0796			-9.24696	-2.81722e-11	-28.1722			9.24624	2.87813e-11	28.7813			-9.24552	-2.26516e-11	-22.6516
				0.753999	1.16644e-12								9.24336	2.518e-11	25.18			9.24448	7.32261e-11	73.2261			-9.24376	-2.958e-11	-29.58			9.24304	3.75169e-11	37.5169			-9.24464	-2.66367e-11	-26.6367			9.24392	2.85643e-11	28.5643			-9.2432	-2.17861e-11	-21.7861
				0.75632	1.23439e-12								9.24104	2.1891e-11	21.891			9.24216	7.487e-11	74.87			-9.24144	-2.74939e-11	-27.4939			9.24072	3.7679e-11	37.679			-9.24232	-2.92284e-11	-29.2284			9.2416	2.87455e-11	28.7455			-9.24088	-2.18135e-11	-21.8135
				0.758638	2.16183e-12								9.23872	2.14392e-11	21.4392			9.23984	7.60013e-11	76.0013			-9.23912	-2.96372e-11	-29.6372			9.2384	3.74001e-11	37.4001			-9.24	-2.91759e-11	-29.1759			9.23928	2.80457e-11	28.0457			-9.23856	-2.07001e-11	-20.7001
				0.760961	2.01878e-12								9.2364	2.17968e-11	21.7968			9.23752	7.54159e-11	75.4159			-9.2368	-3.01177e-11	-30.1177			9.23608	3.68863e-11	36.8863			-9.23768	-2.77227e-11	-27.7227			9.23696	2.95049e-11	29.5049			-9.23624	-2.20102e-11	-22.0102
				0.76328	2.31836e-13								9.23408	2.28327e-11	22.8327			9.2352	7.60036e-11	76.0036			-9.23448	-2.92653e-11	-29.2653			9.23376	3.56847e-11	35.6847			-9.23536	-2.64114e-11	-26.4114			9.23464	2.96861e-11	29.6861			-9.23392	-2.07562e-11	-20.7562
				0.7656	2.20356e-12								9.23176	2.44051e-11	24.4051			9.23288	7.5956e-11	75.956			-9.23216	-2.77394e-11	-27.7394			9.23144	3.8163e-11	38.163			-9.23304	-2.62302e-11	-26.2302			9.23232	2.8587e-11	28.587			-9.2316	-2.13856e-11	-21.3856
				0.767919	1.85785e-12								9.22944	2.38877e-11	23.8877			9.23056	7.56329e-11	75.6329			-9.22984	-2.78658e-11	-27.8658			9.22912	3.65168e-11	36.5168			-9.23072	-2.78193e-11	-27.8193			9.23	2.69812e-11	26.9812			-9.22928	-1.97834e-11	-19.7834
				0.77024	1.31902e-12								9.22712	2.38615e-11	23.8615			9.22824	7.5522e-11	75.522			-9.22752	-2.77788e-11	-27.7788			9.2268	3.54236e-11	35.4236			-9.2284	-2.76882e-11	-27.6882			9.22768	2.88969e-11	28.8969			-9.22696	-2.03759e-11	-20.3759
				0.77256	8.13577e-13								9.2248	2.29782e-11	22.9782			9.22592	7.56508e-11	75.6508			-9.2252	-2.79767e-11	-27.9767			9.22448	3.74168e-11	37.4168			-9.22608	-2.77192e-11	-27.7192			9.22536	2.83748e-11	28.3748			-9.22464	-2.19554e-11	-21.9554
				0.774879	-3.43945e-13								9.22248	2.34276e-11	23.4276			9.2236	7.5857e-11	75.857			-9.22288	-2.94858e-11	-29.4858			9.22216	3.74979e-11	37.4979			-9.22376	-2.88922e-11	-28.8922			9.22304	2.71755e-11	27.1755			-9.22232	-2.13987e-11	-21.3987
				0.7772	-5.39048e-15								9.22016	2.28065e-11	22.8065			9.22128	7.64483e-11	76.4483			-9.22056	-2.73747e-11	-27.3747			9.21984	3.70699e-11	37.0699			-9.22144	-2.84988e-11	-28.4988			9.22072	2.79027e-11	27.9027			-9.22	-2.11853e-11	-21.1853
				0.779519	9.006e-13								9.21784	2.35361e-11	23.5361			9.21896	7.48568e-11	74.8568			-9.21824	-2.73305e-11	-27.3305			9.21752	3.55988e-11	35.5988			-9.21912	-2.87003e-11	-28.7003			9.2184	2.77525e-11	27.7525			-9.21768	-2.15036e-11	-21.5036
				0.78184	-2.36657e-13								9.21552	2.18791e-11	21.8791			9.21664	7.23868e-11	72.3868			-9.21592	-2.93917e-11	-29.3917			9.2152	3.42029e-11	34.2029			-9.2168	-2.73127e-11	-27.3127			9.21608	2.78836e-11	27.8836			-9.21536	-2.02269e-11	-20.2269
				0.784159	-1.8142e-15								9.2132	2.29031e-11	22.9031			9.21432	7.4653e-11	74.653			-9.2136	-2.85298e-11	-28.5298			9.21288	3.8467e-11	38.467			-9.21448	-2.60622e-11	-26.0622			9.21376	2.77799e-11	27.7799			-9.21304	-2.01148e-11	-20.1148
				0.78648	2.07481e-12								9.21088	2.21306e-11	22.1306			9.212	7.54088e-11	75.4088			-9.21128	-2.64615e-11	-26.4615			9.21056	3.86685e-11	38.6685			-9.21216	-2.56664e-11	-25.6664			9.21144	2.91174e-11	29.1174			-9.21072	-2.0929e-11	-20.929
				0.788798	2.01759e-12								9.20856	2.41965e-11	24.1965			9.20968	7.34883e-11	73.4883			-9.20896	-2.80518e-11	-28.0518			9.20824	3.89081e-11	38.9081			-9.20984	-2.47163e-11	-24.7163			9.20912	2.7954e-11	27.954			-9.2084	-2.09064e-11	-20.9064
				0.791121	-1.06718e-13								9.20624	2.21818e-11	22.1818			9.20736	7.33763e-11	73.3763			-9.20664	-2.87003e-11	-28.7003			9.20592	3.71867e-11	37.1867			-9.20752	-2.58857e-11	-25.8857			9.2068	2.74485e-11	27.4485			-9.20608	-1.98525e-11	-19.8525
				0.793439	7.00329e-13								9.20392	2.37232e-11	23.7232			9.20504	7.23844e-11	72.3844			-9.20432	-2.77359e-11	-27.7359			9.2036	3.52508e-11	35.2508			-9.2052	-2.62791e-11	-26.2791			9.20448	2.72804e-11	27.2804			-9.20376	-2.0178e-11	-20.178
				0.79576	7.79007e-13								9.2016	2.30759e-11	23.0759			9.20272	7.43812e-11	74.3812			-9.202	-2.78467e-11	-27.8467			9.20128	3.63987e-11	36.3987			-9.20288	-2.49321e-11	-24.9321			9.20216	2.76845e-11	27.6845			-9.20144	-2.28435e-11	-22.8435
				0.79808	1.74222e-12								9.19928	2.3039e-11	23.039			9.2004	7.33024e-11	73.3024			-9.19968	-2.94465e-11	-29.4465			9.19896	3.73369e-11	37.3369			-9.20056	-2.62934e-11	-26.2934			9.19984	2.75784e-11	27.5784			-9.19912	-2.02722e-11	-20.2722
				0.8004	1.32856e-12								9.19696	2.21806e-11	22.1806			9.19808	7.42346e-11	74.2346			-9.19736	-2.83212e-11	-28.3212			9.19664	3.51327e-11	35.1327			-9.19824	-2.66248e-11	-26.6248			9.19752	2.71588e-11	27.1588			-9.1968	-2.00624e-11	-20.0624
				0.802718	2.00805e-12								9.19464	2.3852e-11	23.852			9.19576	7.36814e-11	73.6814			-9.19504	-2.6123e-11	-26.123			9.19432	3.62831e-11	36.2831			-9.19592	-2.57021e-11	-25.7021			9.1952	2.84987e-11	28.4987			-9.19448	-2.11901e-11	-21.1901
				0.805039	1.51966e-13								9.19232	2.40379e-11	24.0379			9.19344	7.6198e-11	76.198			-9.19272	-2.45458e-11	-24.5458			9.192	3.59195e-11	35.9195			-9.1936	-2.47318e-11	-24.7318			9.19288	2.75236e-11	27.5236			-9.19216	-2.34014e-11	-23.4014
				0.80736	1.63887e-13								9.19	2.25454e-11	22.5454			9.19112	7.54791e-11	75.4791			-9.1904	-2.56509e-11	-25.6509			9.18968	3.63391e-11	36.3391			-9.19128	-2.49297e-11	-24.9297			9.19056	2.87205e-11	28.7205			-9.18984	-2.20245e-11	-22.0245
				0.809679	1.57652e-12								9.18768	2.29352e-11	22.9352			9.1888	7.4467e-11	74.467			-9.18808	-2.83259e-11	-28.3259			9.18736	3.70568e-11	37.0568			-9.18896	-2.53839e-11	-25.3839			9.18824	2.95382e-11	29.5382			-9.18752	-2.0116e-11	-20.116
				0.812	2.58062e-13								9.18536	2.43622e-11	24.3622			9.18648	7.64912e-11	76.4912			-9.18576	-2.88719e-11	-28.8719			9.18504	3.56728e-11	35.6728			-9.18664	-2.6235e-11	-26.235			9.18592	2.80744e-11	28.0744			-9.1852	-2.03699e-11	-20.3699
				0.814319	-8.08861e-13								9.18304	2.15357e-11	21.5357			9.18416	7.6043e-11	76.043			-9.18344	-2.73472e-11	-27.3472			9.18272	3.68589e-11	36.8589			-9.18432	-2.64353e-11	-26.4353			9.1836	2.7911e-11	27.911			-9.18288	-2.05106e-11	-20.5106
				0.81664	-1.78161e-12								9.18072	2.47925e-11	24.7925			9.18184	7.67714e-11	76.7714			-9.18112	-2.82091e-11	-28.2091			9.1804	3.71855e-11	37.1855			-9.182	-2.53946e-11	-25.3946			9.18128	2.72113e-11	27.2113			-9.18056	-2.24942e-11	-22.4942
				0.818958	2.59576e-12								9.1784	2.23154e-11	22.3154			9.17952	7.42632e-11	74.2632			-9.1788	-2.79683e-11	-27.9683			9.17808	3.50183e-11	35.0183			-9.17968	-2.63638e-11	-26.3638			9.17896	2.91282e-11	29.1282			-9.17824	-2.08551e-11	-20.8551
				0.82128	2.31561e-12								9.17608	2.32225e-11	23.2225			9.1772	7.41619e-11	74.1619			-9.17648	-3.02071e-11	-30.2071			9.17576	3.68756e-11	36.8756			-9.17736	-2.52444e-11	-25.2444			9.17664	2.82734e-11	28.2734			-9.17592	-2.13439e-11	-21.3439
				0.8236	9.95137e-14								9.17376	2.31749e-11	23.1749			9.17488	7.52967e-11	75.2967			-9.17416	-2.85131e-11	-28.5131			9.17344	3.64595e-11	36.4595			-9.17504	-2.45124e-11	-24.5124			9.17432	2.61849e-11	26.1849			-9.1736	-1.93638e-11	-19.3638
				0.82592	1.23677e-12								9.17144	2.32333e-11	23.2333			9.17256	7.29972e-11	72.9972			-9.17184	-3.03692e-11	-30.3692			9.17112	3.52412e-11	35.2412			-9.17272	-2.74796e-11	-27.4796			9.172	2.85357e-11	28.5357			-9.17128	-2.02364e-11	-20.2364
				0.828239	1.03888e-12								9.16912	2.2394e-11	22.394			9.17024	7.50369e-11	75.0369			-9.16952	-2.78729e-11	-27.8729			9.1688	3.62223e-11	36.2223			-9.1704	-2.71315e-11	-27.1315			9.16968	3.08031e-11	30.8031			-9.16896	-2.0544e-11	-20.544
				0.83056	1.62182e-12								9.1668	2.21938e-11	22.1938			9.16792	7.3021e-11	73.021			-9.1672	-2.75475e-11	-27.5475			9.16648	3.63975e-11	36.3975			-9.16808	-2.66642e-11	-26.6642			9.16736	2.94596e-11	29.4596			-9.16664	-2.03413e-11	-20.3413
				0.83288	9.64973e-13								9.16448	2.28852e-11	22.8852			9.1656	7.41321e-11	74.1321			-9.16488	-2.83736e-11	-28.3736			9.16416	3.58158e-11	35.8158			-9.16576	-2.6266e-11	-26.266			9.16504	2.83187e-11	28.3187			-9.16432	-2.00004e-11	-20.0004
				0.835199	2.53294e-13								9.16216	2.25085e-11	22.5085			9.16328	7.51501e-11	75.1501			-9.16256	-2.76917e-11	-27.6917			9.16184	3.77935e-11	37.7935			-9.16344	-2.43682e-11	-24.3682			9.16272	2.82913e-11	28.2913			-9.162	-2.10125e-11	-21.0125
				0.83752	1.24548e-13								9.15984	2.14618e-11	21.4618			9.16096	7.40295e-11	74.0295			-9.16024	-2.6992e-11	-26.992			9.15952	3.85266e-11	38.5266			-9.16112	-2.4094e-11	-24.094			9.1604	2.80958e-11	28.0958			-9.15968	-2.09219e-11	-20.9219
				0.839839	1.19779e-13								9.15752	2.10196e-11	21.0196			9.15864	7.4411e-11	74.411			-9.15792	-2.6272e-11	-26.272			9.1572	3.82751e-11	38.2751			-9.1588	-2.45434e-11	-24.5434			9.15808	2.92843e-11	29.2843			-9.15736	-2.19172e-11	-21.9172
				0.84216	8.33843e-13								9.1552	2.19089e-11	21.9089			9.15632	7.30413e-11	73.0413			-9.1556	-2.66224e-11	-26.6224			9.15488	3.73119e-11	37.3119			-9.15648	-2.42859e-11	-24.2859			9.15576	2.79337e-11	27.9337			-9.15504	-2.21426e-11	-22.1426
				0.844479	2.88663e-12								9.15288	2.34455e-11	23.4455			9.154	7.29173e-11	72.9173			-9.15328	-2.63101e-11	-26.3101			9.15256	3.73727e-11	37.3727			-9.15416	-2.5757e-11	-25.757			9.15344	2.73472e-11	27.3472			-9.15272	-2.19983e-11	-21.9983
				0.8468	2.0307e-12								9.15056	2.31617e-11	23.1617			9.15168	7.50011e-11	75.0011			-9.15096	-2.80684e-11	-28.0684			9.15024	3.48216e-11	34.8216			-9.15184	-2.38449e-11	-23.8449			9.15112	2.66224e-11	26.6224			-9.1504	-2.16097e-11	-21.6097
				0.849118	1.86977e-12								9.14824	2.2487e-11	22.487			9.14936	7.49927e-11	74.9927			-9.14864	-2.7799e-11	-27.799			9.14792	3.59422e-11	35.9422			-9.14952	-2.60908e-11	-26.0908			9.1488	2.68203e-11	26.8203			-9.14808	-2.16586e-11	-21.6586
				0.85144	-3.99973e-13								9.14592	2.22128e-11	22.2128			9.14704	7.53349e-11	75.3349			-9.14632	-2.89577e-11	-28.9577			9.1456	3.68267e-11	36.8267			-9.1472	-2.42192e-11	-24.2192			9.14648	2.90853e-11	29.0853			-9.14576	-2.19828e-11	-21.9828
				0.853759	6.43108e-13								9.1436	2.23261e-11	22.3261			9.14472	7.29388e-11	72.9388			-9.144	-2.92367e-11	-29.2367			9.14328	3.72344e-11	37.2344			-9.14488	-2.17527e-11	-21.7527			9.14416	2.75427e-11	27.5427			-9.14344	-2.04605e-11	-20.4605
				0.85608	-8.10053e-13								9.14128	2.22414e-11	22.2414			9.1424	7.35956e-11	73.5956			-9.14168	-2.71672e-11	-27.1672			9.14096	3.45975e-11	34.5975			-9.14256	-2.37721e-11	-23.7721			9.14184	2.66164e-11	26.6164			-9.14112	-2.06894e-11	-20.6894
				0.8584	1.6099e-12								9.13896	2.26241e-11	22.6241			9.14008	7.32225e-11	73.2225			-9.13936	-2.83247e-11	-28.3247			9.13864	3.54475e-11	35.4475			-9.14024	-2.47902e-11	-24.7902			9.13952	2.75868e-11	27.5868			-9.1388	-2.18207e-11	-21.8207
				0.86072	3.72503e-13								9.13664	2.20221e-11	22.0221			9.13776	7.47376e-11	74.7376			-9.13704	-2.80136e-11	-28.0136			9.13632	3.59028e-11	35.9028			-9.13792	-2.46567e-11	-24.6567			9.1372	2.84034e-11	28.4034			-9.13648	-2.17253e-11	-21.7253
				0.863038	5.73967e-13								9.13432	2.25788e-11	22.5788			9.13544	7.53659e-11	75.3659			-9.13472	-2.87408e-11	-28.7408			9.134	3.87352e-11	38.7352			-9.1356	-2.54447e-11	-25.4447			9.13488	2.85309e-11	28.5309			-9.13416	-2.24191e-11	-22.4191
				0.865359	-6.02629e-13								9.132	2.29233e-11	22.9233			9.13312	7.38018e-11	73.8018			-9.1324	-2.75988e-11	-27.5988			9.13168	3.64345e-11	36.4345			-9.13328	-2.34062e-11	-23.4062			9.13256	2.74116e-11	27.4116			-9.13184	-2.05583e-11	-20.5583
				0.86768	8.25498e-13								9.12968	2.33263e-11	23.3263			9.1308	7.41273e-11	74.1273			-9.13008	-2.7414e-11	-27.414			9.12936	3.56859e-11	35.6859			-9.13096	-2.22785e-11	-22.2785			9.13024	2.79671e-11	27.9671			-9.12952	-2.14714e-11	-21.4714
				0.869999	-8.8837e-14								9.12736	2.33668e-11	23.3668			9.12848	7.41571e-11	74.1571			-9.12776	-2.82198e-11	-28.2198			9.12704	3.52198e-11	35.2198			-9.12864	-2.26468e-11	-22.6468			9.12792	2.72745e-11	27.2745			-9.1272	-1.90503e-11	-19.0503
				0.87232	4.77407e-13								9.12504	2.28184e-11	22.8184			9.12616	7.28482e-11	72.8482			-9.12544	-2.85143e-11	-28.5143			9.12472	3.45415e-11	34.5415			-9.12632	-2.22546e-11	-22.2546			9.1256	2.74771e-11	27.4771			-9.12488	-2.23619e-11	-22.3619
				0.874639	2.02474e-12								9.12272	2.45148e-11	24.5148			9.12384	7.0638e-11	70.638			-9.12312	-2.8829e-11	-28.829			9.1224	3.58194e-11	35.8194			-9.124	-2.39235e-11	-23.9235			9.12328	2.69299e-11	26.9299			-9.12256	-2.17015e-11	-21.7015
				0.87696	1.18789e-12								9.1204	2.4361e-11	24.361			9.12152	7.25108e-11	72.5108			-9.1208	-2.75105e-11	-27.5105			9.12008	3.55023e-11	35.5023			-9.12168	-2.24489e-11	-22.4489			9.12096	2.78169e-11	27.8169			-9.12024	-2.28519e-11	-22.8519
				0.879279	2.38989e-13								9.11808	2.18063e-11	21.8063			9.1192	7.35193e-11	73.5193			-9.11848	-2.81984e-11	-28.1984			9.11776	3.4967e-11	34.967			-9.11936	-2.36672e-11	-23.6672			9.11864	2.89994e-11	28.9994			-9.11792	-2.20031e-11	-22.0031
				0.8816	1.37744e-12								9.11576	2.28852e-11	22.8852			9.11688	7.31378e-11	73.1378			-9.11616	-2.67452e-11	-26.7452			9.11544	3.54188e-11	35.4188			-9.11704	-2.30164e-11	-23.0164			9.11632	2.81971e-11	28.1971			-9.1156	-2.12783e-11	-21.2783
				0.88392	2.11296e-12								9.11344	2.30497e-11	23.0497			9.11456	7.34013e-11	73.4013			-9.11384	-2.62088e-11	-26.2088			9.11312	3.44199e-11	34.4199			-9.11472	-2.28006e-11	-22.8006			9.114	2.78419e-11	27.8419			-9.11328	-2.26063e-11	-22.6063
				0.88624	-4.88188e-13								9.11112	2.36112e-11	23.6112			9.11224	7.1519e-11	71.519			-9.11152	-2.63828e-11	-26.3828			9.1108	3.67981e-11	36.7981			-9.1124	-2.42681e-11	-24.2681			9.11168	2.69454e-11	26.9454			-9.11096	-2.17086e-11	-21.7086
				0.888559	-1.20106e-12								9.1088	2.45529e-11	24.5529			9.10992	7.17967e-11	71.7967			-9.1092	-2.6564e-11	-26.564			9.10848	3.70592e-11	37.0592			-9.11008	-2.50405e-11	-25.0405			9.10936	2.86084e-11	28.6084			-9.10864	-2.29615e-11	-22.9615
				0.89088	1.70288e-12								9.10648	2.35814e-11	23.5814			9.1076	7.25466e-11	72.5466			-9.10688	-2.80565e-11	-28.0565			9.10616	3.58337e-11	35.8337			-9.10776	-2.53004e-11	-25.3004			9.10704	2.82579e-11	28.2579			-9.10632	-2.27744e-11	-22.7744
				0.893199	5.28667e-13								9.10416	2.18314e-11	21.8314			9.10528	6.96844e-11	69.6844			-9.10456	-2.61015e-11	-26.1015			9.10384	3.69829e-11	36.9829			-9.10544	-2.42943e-11	-24.2943			9.10472	2.86621e-11	28.6621			-9.104	-2.17217e-11	-21.7217
				0.895519	-4.83058e-14								9.10184	2.13903e-11	21.3903			9.10296	7.09837e-11	70.9837			-9.10224	-2.77919e-11	-27.7919			9.10152	3.83681e-11	38.3681			-9.10312	-2.54685e-11	-25.4685			9.1024	2.7526e-11	27.526			-9.10168	-2.25097e-11	-22.5097
				0.89784	-7.77466e-15								9.09952	2.32917e-11	23.2917			9.10064	7.12508e-11	71.2508			-9.09992	-2.77835e-11	-27.7835			9.0992	3.61103e-11	36.1103			-9.1008	-2.36553e-11	-23.6553			9.10008	2.71409e-11	27.1409			-9.09936	-2.14428e-11	-21.4428
				0.900159	1.16882e-12								9.0972	2.22069e-11	22.2069			9.09832	7.26491e-11	72.6491			-9.0976	-2.85036e-11	-28.5036			9.09688	3.5544e-11	35.544			-9.09848	-2.47234e-11	-24.7234			9.09776	2.69872e-11	26.9872			-9.09704	-2.23333e-11	-22.3333
				0.90248	2.3025e-12								9.09488	2.31808e-11	23.1808			9.096	7.18504e-11	71.8504			-9.09528	-2.91699e-11	-29.1699			9.09456	3.58623e-11	35.8623			-9.09616	-2.40726e-11	-24.0726			9.09544	2.67571e-11	26.7571			-9.09472	-2.08706e-11	-20.8706
				0.904799	-3.92821e-13								9.09256	2.33e-11	23.3			9.09368	7.11256e-11	71.1256			-9.09296	-2.77514e-11	-27.7514			9.09224	3.48752e-11	34.8752			-9.09384	-2.35087e-11	-23.5087			9.09312	2.78359e-11	27.8359			-9.0924	-2.0662e-11	-20.662
				0.90712	1.60036e-12								9.09024	2.13915e-11	21.3915			9.09136	7.33524e-11	73.3524			-9.09064	-2.79933e-11	-27.9933			9.08992	3.53056e-11	35.3056			-9.09152	-2.39784e-11	-23.9784			9.0908	2.6856e-11	26.856			-9.09008	-2.02924e-11	-20.2924
				0.909441	-5.20375e-13								9.08792	2.14916e-11	21.4916			9.08904	7.44956e-11	74.4956			-9.08832	-2.68251e-11	-26.8251			9.0876	3.59541e-11	35.9541			-9.0892	-2.30891e-11	-23.0891			9.08848	2.78085e-11	27.8085			-9.08776	-2.12854e-11	-21.2854
				0.91176	7.56718e-14								9.0856	2.28947e-11	22.8947			9.08672	7.27218e-11	72.7218			-9.086	-2.73985e-11	-27.3985			9.08528	3.62092e-11	36.2092			-9.08688	-2.38031e-11	-23.8031			9.08616	2.82579e-11	28.2579			-9.08544	-2.13534e-11	-21.3534
				0.914079	3.67735e-13								9.08328	2.35539e-11	23.5539			9.0844	7.00241e-11	70.0241			-9.08368	-2.66201e-11	-26.6201			9.08296	3.69197e-11	36.9197			-9.08456	-2.25467e-11	-22.5467			9.08384	2.78574e-11	27.8574			-9.08312	-2.15024e-11	-21.5024
				0.9164	3.79656e-13								9.08096	2.30592e-11	23.0592			9.08208	7.08347e-11	70.8347			-9.08136	-2.80768e-11	-28.0768			9.08064	3.70615e-11	37.0615			-9.08224	-2.25193e-11	-22.5193			9.08152	2.61432e-11	26.1432			-9.0808	-1.9483e-11	-19.483
				0.91872	-2.6578e-12								9.07864	2.36314e-11	23.6314			9.07976	7.09134e-11	70.9134			-9.07904	-2.82663e-11	-28.2663			9.07832	3.67421e-11	36.7421			-9.07992	-2.21807e-11	-22.1807			9.0792	2.73674e-11	27.3674			-9.07848	-2.15656e-11	-21.5656
				0.92104	3.99091e-14								9.07632	2.32595e-11	23.2595			9.07744	6.9769e-11	69.769			-9.07672	-2.69801e-11	-26.9801			9.076	3.69435e-11	36.9435			-9.0776	-2.21509e-11	-22.1509			9.07688	2.85798e-11	28.5798			-9.07616	-2.19149e-11	-21.9149
				0.923361	-9.24133e-14								9.074	2.32368e-11	23.2368			9.07512	7.09563e-11	70.9563			-9.0744	-2.74414e-11	-27.4414			9.07368	3.57419e-11	35.7419			-9.07528	-2.28423e-11	-22.8423			9.07456	2.96682e-11	29.6682			-9.07384	-2.0414e-11	-20.414
				0.925679	6.93176e-13								9.07168	2.1916e-11	21.916			9.0728	7.27182e-11	72.7182			-9.07208	-2.59978e-11	-25.9978			9.07136	3.64905e-11	36.4905			-9.07296	-2.36577e-11	-23.6577			9.07224	2.68584e-11	26.8584			-9.07152	-2.12211e-11	-21.2211
				0.928	1.84355e-12								9.06936	2.1984e-11	21.984			9.07048	7.14808e-11	71.4808			-9.06976	-2.55996e-11	-25.5996			9.06904	3.56537e-11	35.6537			-9.07064	-2.3852e-11	-23.852			9.06992	2.90471e-11	29.0471			-9.0692	-2.28638e-11	-22.8638
				0.930319	2.7543e-12								9.06704	2.16001e-11	21.6001			9.06816	7.02208e-11	70.2208			-9.06744	-2.62481e-11	-26.2481			9.06672	3.66693e-11	36.6693			-9.06832	-2.27517e-11	-22.7517			9.0676	2.67583e-11	26.7583			-9.06688	-2.26659e-11	-22.6659
				0.93264	2.33588e-12								9.06472	2.20579e-11	22.0579			9.06584	7.15214e-11	71.5214			-9.06512	-2.58166e-11	-25.8166			9.0644	3.50612e-11	35.0612			-9.066	-2.307e-11	-23.07			9.06528	2.52229e-11	25.2229			-9.06456	-2.21569e-11	-22.1569
				0.934958	-1.55594e-13								9.0624	2.16669e-11	21.6669			9.06352	7.03078e-11	70.3078			-9.0628	-2.77728e-11	-27.7728			9.06208	3.5426e-11	35.426			-9.06368	-2.40261e-11	-24.0261			9.06296	2.5056e-11	25.056			-9.06224	-2.21759e-11	-22.1759
				0.937279	1.41201e-12								9.06008	2.16669e-11	21.6669			9.0612	7.30449e-11	73.0449			-9.06048	-2.74533e-11	-27.4533			9.05976	3.62259e-11	36.2259			-9.06136	-2.32929e-11	-23.2929			9.06064	2.83307e-11	28.3307			-9.05992	-2.12258e-11	-21.2258
				0.939599	3.50652e-12								9.05776	2.37769e-11	23.7769			9.05888	7.25799e-11	72.5799			-9.05816	-2.80649e-11	-28.0649			9.05744	3.82465e-11	38.2465			-9.05904	-2.2654e-11	-22.654			9.05832	2.84618e-11	28.4618			-9.0576	-1.97906e-11	-19.7906
				0.94192	2.3788e-12								9.05544	2.36946e-11	23.6946			9.05656	7.38615e-11	73.8615			-9.05584	-2.78622e-11	-27.8622			9.05512	3.53175e-11	35.3175			-9.05672	-2.18779e-11	-21.8779			9.056	2.98184e-11	29.8184			-9.05528	-2.13999e-11	-21.3999
				0.94424	6.82447e-13								9.05312	2.25717e-11	22.5717			9.05424	7.2543e-11	72.543			-9.05352	-2.58416e-11	-25.8416			9.0528	3.60936e-11	36.0936			-9.0544	-2.44087e-11	-24.4087			9.05368	2.67309e-11	26.7309			-9.05296	-2.28066e-11	-22.8066
				0.94656	2.69828e-12								9.0508	2.21103e-11	22.1103			9.05192	7.17181e-11	71.7181			-9.0512	-2.56855e-11	-25.6855			9.05048	3.54367e-11	35.4367			-9.05208	-2.30426e-11	-23.0426			9.05136	2.62207e-11	26.2207			-9.05064	-2.2133e-11	-22.133
				0.948879	2.77338e-12								9.04848	2.33382e-11	23.3382			9.0496	7.07525e-11	70.7525			-9.04888	-2.90305e-11	-29.0305			9.04816	3.54868e-11	35.4868			-9.04976	-2.3349e-11	-23.349			9.04904	2.67476e-11	26.7476			-9.04832	-2.08527e-11	-20.8527
				0.9512	2.35018e-12								9.04616	2.18731e-11	21.8731			9.04728	7.13771e-11	71.3771			-9.04656	-2.8823e-11	-28.823			9.04584	3.37654e-11	33.7654			-9.04744	-2.40237e-11	-24.0237			9.04672	2.66379e-11	26.6379			-9.046	-2.23643e-11	-22.3643
				0.953521	1.77679e-12								9.04384	2.19935e-11	21.9935			9.04496	7.18254e-11	71.8254			-9.04424	-2.67166e-11	-26.7166			9.04352	3.37928e-11	33.7928			-9.04512	-2.29877e-11	-22.9877			9.0444	2.72137e-11	27.2137			-9.04368	-2.3045e-11	-23.045
				0.955839	1.9854e-12								9.04152	2.01004e-11	20.1004			9.04264	7.13938e-11	71.3938			-9.04192	-2.69157e-11	-26.9157			9.0412	3.4675e-11	34.675			-9.0428	-2.36637e-11	-23.6637			9.04208	2.63279e-11	26.3279			-9.04136	-2.19327e-11	-21.9327
				0.95816	8.73182e-13								9.0392	1.96773e-11	19.6773			9.04032	7.12007e-11	71.2007			-9.0396	-2.66046e-11	-26.6046			9.03888	3.54153e-11	35.4153			-9.04048	-2.33549e-11	-23.3549			9.03976	2.66665e-11	26.6665			-9.03904	-2.04379e-11	-20.4379
				0.960479	7.74238e-13								9.03688	2.12902e-11	21.2902			9.038	7.13211e-11	71.3211			-9.03728	-2.87622e-11	-28.7622			9.03656	3.52174e-11	35.2174			-9.03816	-2.39653e-11	-23.9653			9.03744	2.68143e-11	26.8143			-9.03672	-2.1798e-11	-21.798
				0.9628	1.57175e-12								9.03456	2.31904e-11	23.1904			9.03568	7.16692e-11	71.6692			-9.03496	-2.91723e-11	-29.1723			9.03424	3.61532e-11	36.1532			-9.03584	-2.41584e-11	-24.1584			9.03512	2.66963e-11	26.6963			-9.0344	-2.11972e-11	-21.1972
				0.965118	2.71973e-12								9.03224	2.37149e-11	23.7149			9.03336	7.30568e-11	73.0568			-9.03264	-2.77323e-11	-27.7323			9.03192	3.49623e-11	34.9623			-9.03352	-2.13808e-11	-21.3808			9.0328	2.68131e-11	26.8131			-9.03208	-2.17241e-11	-21.7241
				0.967439	2.29535e-12								9.02992	2.22414e-11	22.2414			9.03104	7.2512e-11	72.512			-9.03032	-2.67631e-11	-26.7631			9.0296	3.53056e-11	35.3056			-9.0312	-2.08324e-11	-20.8324			9.03048	2.6161e-11	26.161			-9.02976	-2.03675e-11	-20.3675
				0.96976	-3.05798e-13								9.0276	2.26634e-11	22.6634			9.02872	7.30723e-11	73.0723			-9.028	-2.6967e-11	-26.967			9.02728	3.49658e-11	34.9658			-9.02888	-2.15739e-11	-21.5739			9.02816	2.86132e-11	28.6132			-9.02744	-2.3163e-11	-23.163
				0.97208	4.66678e-13								9.02528	2.18099e-11	21.8099			9.0264	7.27802e-11	72.7802			-9.02568	-2.69538e-11	-26.9538			9.02496	3.54784e-11	35.4784			-9.02656	-2.10351e-11	-21.0351			9.02584	2.91735e-11	29.1735			-9.02512	-2.36446e-11	-23.6446
				0.974399	-1.17483e-12								9.02296	2.43169e-11	24.3169			9.02408	7.13438e-11	71.3438			-9.02336	-2.64055e-11	-26.4055			9.02264	3.46046e-11	34.6046			-9.02424	-2.16216e-11	-21.6216			9.02352	2.91353e-11	29.1353			-9.0228	-2.23893e-11	-22.3893
				0.97672	-5.82363e-13								9.02064	2.24548e-11	22.4548			9.02176	7.02733e-11	70.2733			-9.02104	-2.71768e-11	-27.1768			9.02032	3.77053e-11	37.7053			-9.02192	-2.16359e-11	-21.6359			9.0212	2.63768e-11	26.3768			-9.02048	-2.21855e-11	-22.1855
				0.97904	1.77917e-12								9.01832	2.12675e-11	21.2675			9.01944	7.16823e-11	71.6823			-9.01872	-2.74116e-11	-27.4116			9.018	3.3645e-11	33.645			-9.0196	-2.253e-11	-22.53			9.01888	2.79373e-11	27.9373			-9.01816	-2.19661e-11	-21.9661
				0.981359	1.0067e-12								9.016	2.1891e-11	21.891			9.01712	6.99573e-11	69.9573			-9.0164	-2.72733e-11	-27.2733			9.01568	3.34805e-11	33.4805			-9.01728	-2.36029e-11	-23.6029			9.01656	2.77692e-11	27.7692			-9.01584	-2.15358e-11	-21.5358
				0.98368	8.98216e-13								9.01368	2.20829e-11	22.0829			9.0148	7.01052e-11	70.1052			-9.01408	-2.67023e-11	-26.7023			9.01336	3.55893e-11	35.5893			-9.01496	-2.23035e-11	-22.3035			9.01424	2.4808e-11	24.808			-9.01352	-2.13272e-11	-21.3272
				0.985999	2.88663e-12								9.01136	2.30044e-11	23.0044			9.01248	7.05844e-11	70.5844			-9.01176	-2.60419e-11	-26.0419			9.01104	3.71569e-11	37.1569			-9.01264	-2.12533e-11	-21.2533			9.01192	2.64221e-11	26.4221			-9.0112	-1.88381e-11	-18.8381
				0.98832	1.13187e-12								9.00904	2.35754e-11	23.5754			9.01016	7.0582e-11	70.582			-9.00944	-2.74641e-11	-27.4641			9.00872	3.48657e-11	34.8657			-9.01032	-2.05511e-11	-20.5511			9.0096	2.57092e-11	25.7092			-9.00888	-1.99396e-11	-19.9396
				0.990639	2.04262e-12								9.00672	2.28184e-11	22.8184			9.00784	7.29376e-11	72.9376			-9.00712	-2.6961e-11	-26.961			9.0064	3.45319e-11	34.5319			-9.008	-2.33478e-11	-23.3478			9.00728	2.56759e-11	25.6759			-9.00656	-1.97453e-11	-19.7453
				0.99296	1.66712e-12								9.0044	2.26146e-11	22.6146			9.00552	7.11196e-11	71.1196			-9.0048	-2.69848e-11	-26.9848			9.00408	3.4638e-11	34.638			-9.00568	-2.29615e-11	-22.9615			9.00496	2.61003e-11	26.1003			-9.00424	-2.13188e-11	-21.3188
				0.995278	1.03888e-12								9.00208	2.15167e-11	21.5167			9.0032	7.12186e-11	71.2186			-9.00248	-2.70742e-11	-27.0742			9.00176	3.40897e-11	34.0897			-9.00336	-2.24179e-11	-22.4179			9.00264	2.68966e-11	26.8966			-9.00192	-1.99932e-11	-19.9932
				0.997601	1.15928e-12								8.99976	2.18528e-11	21.8528			9.00088	7.07048e-11	70.7048			-9.00016	-2.70361e-11	-27.0361			8.99944	3.67158e-11	36.7158			-9.00104	-2.13892e-11	-21.3892			9.00032	2.70503e-11	27.0503			-8.9996	-2.02352e-11	-20.2352
				0.999919	3.53274e-12								8.99744	2.44075e-11	24.4075			8.99856	7.19863e-11	71.9863			-8.99784	-2.63196e-11	-26.3196			8.99712	3.43042e-11	34.3042			-8.99872	-2.12008e-11	-21.2008			8.998	2.65449e-11	26.5449			-8.99728	-2.02793e-11	-20.2793
				1.00224	4.19554e-12								8.99512	2.34204e-11	23.4204			8.99624	6.99156e-11	69.9156			-8.99552	-2.79457e-11	-27.9457			8.9948	3.44556e-11	34.4556			-8.9964	-2.19018e-11	-21.9018			8.99568	2.56473e-11	25.6473			-8.99496	-2.05964e-11	-20.5964
				1.00456	1.87216e-12								8.9928	2.27111e-11	22.7111			8.99392	6.92922e-11	69.2922			-8.9932	-2.65545e-11	-26.5545			8.99248	3.51208e-11	35.1208			-8.99408	-2.20591e-11	-22.0591			8.99336	2.58857e-11	25.8857			-8.99264	-2.02459e-11	-20.2459
				1.00688	1.65519e-12								8.99048	2.10148e-11	21.0148			8.9916	6.94078e-11	69.4078			-8.99088	-2.59012e-11	-25.9012			8.99016	3.61079e-11	36.1079			-8.99176	-2.3641e-11	-23.641			8.99104	2.68036e-11	26.8036			-8.99032	-2.24775e-11	-22.4775
				1.0092	2.05216e-12								8.98816	2.21318e-11	22.1318			8.98928	6.95532e-11	69.5532			-8.98856	-2.59799e-11	-25.9799			8.98784	3.78018e-11	37.8018			-8.98944	-2.19876e-11	-21.9876			8.98872	2.71338e-11	27.1338			-8.988	-2.25443e-11	-22.5443
				1.01152	2.01521e-12								8.98584	2.20459e-11	22.0459			8.98696	6.99383e-11	69.9383			-8.98624	-2.85107e-11	-28.5107			8.98552	3.38799e-11	33.8799			-8.98712	-2.31427e-11	-23.1427			8.9864	2.76631e-11	27.6631			-8.98568	-2.18183e-11	-21.8183
				1.01384	2.91404e-12								8.98352	2.20185e-11	22.0185			8.98464	7.06178e-11	70.6178			-8.98392	-2.80684e-11	-28.0684			8.9832	3.52031e-11	35.2031			-8.9848	-2.11257e-11	-21.1257			8.98408	2.87097e-11	28.7097			-8.98336	-2.16824e-11	-21.6824
				1.01616	4.70934e-12								8.9812	2.18266e-11	21.8266			8.98232	7.07882e-11	70.7882			-8.9816	-2.54423e-11	-25.4423			8.98088	3.60828e-11	36.0828			-8.98248	-2.21485e-11	-22.1485			8.98176	2.60251e-11	26.0251			-8.98104	-2.37042e-11	-23.7042
				1.01848	1.39055e-12								8.97888	2.22748e-11	22.2748			8.98	7.24154e-11	72.4154			-8.97928	-2.54113e-11	-25.4113			8.97856	3.44807e-11	34.4807			-8.98016	-2.30104e-11	-23.0104			8.97944	2.65592e-11	26.5592			-8.97872	-2.18612e-11	-21.8612
				1.0208	2.74358e-12								8.97656	2.22033e-11	22.2033			8.97768	7.09492e-11	70.9492			-8.97696	-2.47008e-11	-24.7008			8.97624	3.56573e-11	35.6573			-8.97784	-2.27863e-11	-22.7863			8.97712	2.78073e-11	27.8073			-8.9764	-2.21414e-11	-22.1414
				1.02312	1.53241e-12								8.97424	2.21806e-11	22.1806			8.97536	7.09265e-11	70.9265			-8.97464	-2.46233e-11	-24.6233			8.97392	3.76421e-11	37.6421			-8.97552	-2.30664e-11	-23.0664			8.9748	2.62767e-11	26.2767			-8.97408	-1.94782e-11	-19.4782
				1.02544	2.05216e-12								8.97192	2.14976e-11	21.4976			8.97304	6.98465e-11	69.8465			-8.97232	-2.54387e-11	-25.4387			8.9716	3.53437e-11	35.3437			-8.9732	-2.14273e-11	-21.4273			8.97248	2.59405e-11	25.9405			-8.97176	-2.00957e-11	-20.0957
				1.02776	1.53599e-12								8.9696	2.13021e-11	21.3021			8.97072	6.93255e-11	69.3255			-8.97	-2.6477e-11	-26.477			8.96928	3.55524e-11	35.5524			-8.97088	-1.98955e-11	-19.8955			8.97016	2.54363e-11	25.4363			-8.96944	-2.04736e-11	-20.4736
				1.03008	1.18789e-12								8.96728	2.24226e-11	22.4226			8.9684	7.06428e-11	70.6428			-8.96768	-2.79147e-11	-27.9147			8.96696	3.61615e-11	36.1615			-8.96856	-2.078e-11	-20.78			8.96784	2.72315e-11	27.2315			-8.96712	-1.88881e-11	-18.8881
				1.0324	2.88186e-12								8.96496	2.40069e-11	24.0069			8.96608	7.01886e-11	70.1886			-8.96536	-2.55174e-11	-25.5174			8.96464	3.4998e-11	34.998			-8.96624	-2.08801e-11	-20.8801			8.96552	2.58249e-11	25.8249			-8.9648	-1.9899e-11	-19.899
				1.03472	2.14276e-12								8.96264	2.06834e-11	20.6834			8.96376	6.89167e-11	68.9167			-8.96304	-2.67321e-11	-26.7321			8.96232	3.43042e-11	34.3042			-8.96392	-2.13772e-11	-21.3772			8.9632	2.57939e-11	25.7939			-8.96248	-2.0451e-11	-20.451
				1.03704	1.79109e-12								8.96032	2.26098e-11	22.6098			8.96144	6.8807e-11	68.807			-8.96072	-2.49726e-11	-24.9726			8.96	3.34996e-11	33.4996			-8.9616	-2.33263e-11	-23.3263			8.96088	2.45946e-11	24.5946			-8.96016	-2.05273e-11	-20.5273
				1.03936	5.58469e-13								8.958	2.19446e-11	21.9446			8.95912	6.9707e-11	69.707			-8.9584	-2.62362e-11	-26.2362			8.95768	3.41457e-11	34.1457			-8.95928	-2.26528e-11	-22.6528			8.95856	2.76893e-11	27.6893			-8.95784	-2.05273e-11	-20.5273
				1.04168	1.3083e-12								8.95568	2.40892e-11	24.0892			8.9568	7.065e-11	70.65			-8.95608	-2.75046e-11	-27.5046			8.95536	3.56596e-11	35.6596			-8.95696	-2.28089e-11	-22.8089			8.95624	2.77537e-11	27.7537			-8.95552	-2.12962e-11	-21.2962
				1.044	1.86143e-12								8.95336	2.20018e-11	22.0018			8.95448	6.87474e-11	68.7474			-8.95376	-2.56974e-11	-25.6974			8.95304	3.277e-11	32.77			-8.95464	-2.01983e-11	-20.1983			8.95392	2.70456e-11	27.0456			-8.9532	-2.168e-11	-21.68
				1.04632	1.98898e-12								8.95104	2.09886e-11	20.9886			8.95216	6.91169e-11	69.1169			-8.95144	-2.53636e-11	-25.3636			8.95072	3.1802e-11	31.802			-8.95232	-2.28435e-11	-22.8435			8.9516	2.83414e-11	28.3414			-8.95088	-2.11114e-11	-21.1114
				1.04864	1.68619e-12								8.94872	2.23392e-11	22.3392			8.94984	6.90275e-11	69.0275			-8.94912	-2.45255e-11	-24.5255			8.9484	3.31729e-11	33.1729			-8.95	-2.27303e-11	-22.7303			8.94928	2.76857e-11	27.6857			-8.94856	-2.19435e-11	-21.9435
				1.05096	3.11908e-12								8.9464	2.1916e-11	21.916			8.94752	6.97928e-11	69.7928			-8.9468	-2.71994e-11	-27.1994			8.94608	3.34209e-11	33.4209			-8.94768	-2.25777e-11	-22.5777			8.94696	2.6055e-11	26.055			-8.94624	-2.05058e-11	-20.5058
				1.05328	6.65758e-13								8.94408	2.37578e-11	23.7578			8.9452	6.97022e-11	69.7022			-8.94448	-2.70683e-11	-27.0683			8.94376	3.5066e-11	35.066			-8.94536	-2.16466e-11	-21.6466			8.94464	2.59703e-11	25.9703			-8.94392	-2.0172e-11	-20.172
				1.0556	1.30472e-12								8.94176	2.26611e-11	22.6611			8.94288	6.8739e-11	68.739			-8.94216	-2.67416e-11	-26.7416			8.94144	3.38167e-11	33.8167			-8.94304	-2.08754e-11	-20.8754			8.94232	2.69621e-11	26.9621			-8.9416	-2.22737e-11	-22.2737
				1.05792	2.96054e-12								8.93944	2.13366e-11	21.3366			8.94056	7.01719e-11	70.1719			-8.93984	-2.59251e-11	-25.9251			8.93912	3.5184e-11	35.184			-8.94072	-2.01196e-11	-20.1196			8.94	2.63816e-11	26.3816			-8.93928	-2.16288e-11	-21.6288
				1.06024	2.24409e-12								8.93712	2.27111e-11	22.7111			8.93824	6.78163e-11	67.8163			-8.93752	-2.54709e-11	-25.4709			8.9368	3.44604e-11	34.4604			-8.9384	-2.04677e-11	-20.4677			8.93768	2.71255e-11	27.1255			-8.93696	-2.15882e-11	-21.5882
				1.06256	7.80199e-13								8.9348	2.24918e-11	22.4918			8.93592	7.10553e-11	71.0553			-8.9352	-2.57498e-11	-25.7498			8.93448	3.34781e-11	33.4781			-8.93608	-2.13403e-11	-21.3403			8.93536	2.71004e-11	27.1004			-8.93464	-2.17766e-11	-21.7766
				1.06488	6.57413e-13								8.93248	2.2847e-11	22.847			8.9336	7.0756e-11	70.756			-8.93288	-2.58154e-11	-25.8154			8.93216	3.49873e-11	34.9873			-8.93376	-2.23655e-11	-22.3655			8.93304	2.69168e-11	26.9168			-8.93232	-2.22951e-11	-22.2951
				1.0672	2.4527e-12								8.93016	2.1277e-11	21.277			8.93128	6.92457e-11	69.2457			-8.93056	-2.69038e-11	-26.9038			8.92984	3.45856e-11	34.5856			-8.93144	-2.25717e-11	-22.5717			8.93072	2.73102e-11	27.3102			-8.93	-2.15537e-11	-21.5537
				1.06952	1.57294e-12								8.92784	2.32094e-11	23.2094			8.92896	6.93243e-11	69.3243			-8.92824	-2.82866e-11	-28.2866			8.92752	3.52138e-11	35.2138			-8.92912	-2.1922e-11	-21.922			8.9284	2.83521e-11	28.3521			-8.92768	-2.1109e-11	-21.109
				1.07184	9.5186e-13								8.92552	2.18433e-11	21.8433			8.92664	6.88296e-11	68.8296			-8.92592	-2.70826e-11	-27.0826			8.9252	3.71665e-11	37.1665			-8.9268	-2.2499e-11	-22.499			8.92608	2.65223e-11	26.5223			-8.92536	-2.20877e-11	-22.0877
				1.07416	1.32379e-12								8.9232	2.29639e-11	22.9639			8.92432	6.91074e-11	69.1074			-8.9236	-2.83987e-11	-28.3987			8.92288	3.54141e-11	35.4141			-8.92448	-1.83291e-11	-18.3291			8.92376	2.4423e-11	24.423			-8.92304	-2.12795e-11	-21.2795
				1.07648	2.21071e-12								8.92088	2.41202e-11	24.1202			8.922	6.87581e-11	68.7581			-8.92128	-2.64913e-11	-26.4913			8.92056	3.38512e-11	33.8512			-8.92216	-2.186e-11	-21.86			8.92144	2.60657e-11	26.0657			-8.92072	-2.27911e-11	-22.7911
				1.0788	1.64089e-12								8.91856	2.16514e-11	21.6514			8.91968	6.70975e-11	67.0975			-8.91896	-2.55353e-11	-25.5353			8.91824	3.57204e-11	35.7204			-8.91984	-2.32464e-11	-23.2464			8.91912	2.86418e-11	28.6418			-8.9184	-2.27028e-11	-22.7028
				1.08112	1.72672e-12								8.91624	2.09516e-11	20.9516			8.91736	6.7957e-11	67.957			-8.91664	-2.67607e-11	-26.7607			8.91592	3.4979e-11	34.979			-8.91752	-2.21759e-11	-22.1759			8.9168	2.72387e-11	27.2387			-8.91608	-2.18839e-11	-21.8839
				1.08344	-1.09616e-12								8.91392	2.10494e-11	21.0494			8.91504	6.97905e-11	69.7905			-8.91432	-2.63268e-11	-26.3268			8.9136	3.63332e-11	36.3332			-8.9152	-2.13033e-11	-21.3033			8.91448	2.82114e-11	28.2114			-8.91376	-2.12616e-11	-21.2616
				1.08576	2.11892e-12								8.9116	2.09242e-11	20.9242			8.91272	6.90442e-11	69.0442			-8.912	-2.67512e-11	-26.7512			8.91128	3.69268e-11	36.9268			-8.91288	-2.04665e-11	-20.4665			8.91216	2.56556e-11	25.6556			-8.91144	-2.06214e-11	-20.6214
				1.08808	2.13561e-12								8.90928	2.03222e-11	20.3222			8.9104	6.93112e-11	69.3112			-8.90968	-2.49976e-11	-24.9976			8.90896	3.54463e-11	35.4463			-8.91056	-2.0364e-11	-20.364			8.90984	2.44873e-11	24.4873			-8.90912	-2.09254e-11	-20.9254
				1.0904	1.61705e-12								8.90696	2.15965e-11	21.5965			8.90808	7.02899e-11	70.2899			-8.90736	-2.62362e-11	-26.2362			8.90664	3.40897e-11	34.0897			-8.90824	-2.04653e-11	-20.4653			8.90752	2.60597e-11	26.0597			-8.9068	-2.06453e-11	-20.6453
				1.09272	2.89497e-12								8.90464	2.16144e-11	21.6144			8.90576	6.82133e-11	68.2133			-8.90504	-2.5248e-11	-25.248			8.90432	3.51184e-11	35.1184			-8.90592	-2.17217e-11	-21.7217			8.9052	2.52563e-11	25.2563			-8.90448	-2.16085e-11	-21.6085
				1.09504	3.20968e-12								8.90232	2.2493e-11	22.493			8.90344	6.86758e-11	68.6758			-8.90272	-2.6359e-11	-26.359			8.902	3.47525e-11	34.7525			-8.9036	-2.08026e-11	-20.8026			8.90288	2.85631e-11	28.5631			-8.90216	-2.07192e-11	-20.7192
				1.09736	1.8662e-12								8.9	2.36433e-11	23.6433			8.90112	6.97165e-11	69.7165			-8.9004	-2.72268e-11	-27.2268			8.89968	3.44532e-11	34.4532			-8.90128	-2.00719e-11	-20.0719			8.90056	2.74044e-11	27.4044			-8.89984	-1.85186e-11	-18.5186
				1.09968	5.34628e-13								8.89768	2.30425e-11	23.0425			8.8988	6.87879e-11	68.7879			-8.89808	-2.55674e-11	-25.5674			8.89736	3.54415e-11	35.4415			-8.89896	-2.1202e-11	-21.202			8.89824	2.68298e-11	26.8298			-8.89752	-2.21759e-11	-22.1759
				1.102	-1.0294e-12								8.89536	2.23154e-11	22.3154			8.89648	6.93971e-11	69.3971			-8.89576	-2.62851e-11	-26.2851			8.89504	3.48526e-11	34.8526			-8.89664	-2.13963e-11	-21.3963			8.89592	2.78395e-11	27.8395			-8.8952	-2.1798e-11	-21.798
				1.10432	-6.02629e-13								8.89304	2.18063e-11	21.8063			8.89416	6.93434e-11	69.3434			-8.89344	-2.5875e-11	-25.875			8.89272	3.55571e-11	35.5571			-8.89432	-2.02614e-11	-20.2614			8.8936	2.70635e-11	27.0635			-8.89288	-2.06119e-11	-20.6119
				1.10664	1.04246e-12								8.89072	2.20698e-11	22.0698			8.89184	6.99931e-11	69.9931			-8.89112	-2.72054e-11	-27.2054			8.8904	3.54129e-11	35.4129			-8.892	-2.05952e-11	-20.5952			8.89128	2.60561e-11	26.0561			-8.89056	-2.07204e-11	-20.7204
				1.10896	6.32379e-13								8.8884	1.98573e-11	19.8573			8.88952	6.80071e-11	68.0071			-8.8888	-2.65628e-11	-26.5628			8.88808	3.32635e-11	33.2635			-8.88968	-2.02698e-11	-20.2698			8.88896	2.66653e-11	26.6653			-8.88824	-2.21271e-11	-22.1271
				1.11128	2.22859e-12								8.88608	2.10064e-11	21.0064			8.8872	6.88809e-11	68.8809			-8.88648	-2.62577e-11	-26.2577			8.88576	3.46797e-11	34.6797			-8.88736	-2.05833e-11	-20.5833			8.88664	2.66558e-11	26.6558			-8.88592	-2.2679e-11	-22.679
				1.1136	1.82566e-12								8.88376	2.09194e-11	20.9194			8.88488	6.90323e-11	69.0323			-8.88416	-2.56986e-11	-25.6986			8.88344	3.40003e-11	34.0003			-8.88504	-2.13236e-11	-21.3236			8.88432	2.66772e-11	26.6772			-8.8836	-2.06071e-11	-20.6071
				1.11592	1.08537e-12								8.88144	2.11316e-11	21.1316			8.88256	6.94459e-11	69.4459			-8.88184	-2.63196e-11	-26.3196			8.88112	3.5122e-11	35.122			-8.88272	-1.8397e-11	-18.397			8.882	2.94572e-11	29.4572			-8.88128	-2.05976e-11	-20.5976
				1.11824	1.34287e-12								8.87912	2.22605e-11	22.2605			8.88024	6.83659e-11	68.3659			-8.87952	-2.49249e-11	-24.9249			8.8788	3.45558e-11	34.5558			-8.8804	-1.77568e-11	-17.7568			8.87968	2.76941e-11	27.6941			-8.87896	-2.14595e-11	-21.4595
				1.12056	1.72195e-12								8.8768	2.23106e-11	22.3106			8.87792	7.00253e-11	70.0253			-8.8772	-2.7625e-11	-27.625			8.87648	3.57359e-11	35.7359			-8.87808	-2.00075e-11	-20.0075			8.87736	2.71922e-11	27.1922			-8.87664	-2.28817e-11	-22.8817
				1.12288	6.27611e-13								8.87448	2.22438e-11	22.2438			8.8756	6.73967e-11	67.3967			-8.87488	-2.73043e-11	-27.3043			8.87416	3.55035e-11	35.5035			-8.87576	-1.90133e-11	-19.0133			8.87504	2.60168e-11	26.0168			-8.87432	-2.3064e-11	-23.064
				1.1252	2.84288e-13								8.87216	2.03567e-11	20.3567			8.87328	6.61224e-11	66.1224			-8.87256	-2.55353e-11	-25.5353			8.87184	3.50946e-11	35.0946			-8.87344	-1.92291e-11	-19.2291			8.87272	2.48807e-11	24.8807			-8.872	-2.14893e-11	-21.4893
				1.12752	-1.17245e-12								8.86984	2.08705e-11	20.8705			8.87096	6.59698e-11	65.9698			-8.87024	-2.57832e-11	-25.7832			8.86952	3.26043e-11	32.6043			-8.87112	-1.88023e-11	-18.8023			8.8704	2.50166e-11	25.0166			-8.86968	-2.06417e-11	-20.6417
				1.12984	4.01113e-13								8.86752	2.16788e-11	21.6788			8.86864	6.65444e-11	66.5444			-8.86792	-2.64079e-11	-26.4079			8.8672	3.56227e-11	35.6227			-8.8688	-2.08801e-11	-20.8801			8.86808	2.41297e-11	24.1297			-8.86736	-2.25669e-11	-22.5669
				1.13216	2.71175e-13								8.8652	2.15798e-11	21.5798			8.86632	6.79654e-11	67.9654			-8.8656	-2.66606e-11	-26.6606			8.86488	3.56394e-11	35.6394			-8.86648	-1.99002e-11	-19.9002			8.86576	2.51204e-11	25.1204			-8.86504	-2.28817e-11	-22.8817
				1.13448	8.83911e-13								8.86288	2.11006e-11	21.1006			8.864	6.91503e-11	69.1503			-8.86328	-2.53564e-11	-25.3564			8.86256	3.37726e-11	33.7726			-8.86416	-2.02006e-11	-20.2006			8.86344	2.46066e-11	24.6066			-8.86272	-2.18994e-11	-21.8994
				1.1368	1.99256e-12								8.86056	2.13915e-11	21.3915			8.86168	6.88404e-11	68.8404			-8.86096	-2.52956e-11	-25.2956			8.86024	3.43185e-11	34.3185			-8.86184	-1.90991e-11	-19.0991			8.86112	2.44575e-11	24.4575			-8.8604	-2.10005e-11	-21.0005
				1.13912	2.29773e-12								8.85824	1.81371e-11	18.1371			8.85936	6.75028e-11	67.5028			-8.85864	-2.78729e-11	-27.8729			8.85792	3.56656e-11	35.6656			-8.85952	-2.02996e-11	-20.2996			8.8588	2.52157e-11	25.2157			-8.85808	-2.20019e-11	-22.0019
				1.14144	3.36704e-12								8.85592	1.8447e-11	18.447			8.85704	6.75589e-11	67.5589			-8.85632	-2.58249e-11	-25.8249			8.8556	3.40301e-11	34.0301			-8.8572	-2.15549e-11	-21.5549			8.85648	2.72351e-11	27.2351			-8.85576	-2.08968e-11	-20.8968
				1.14376	6.51453e-13								8.8536	1.9713e-11	19.713			8.85472	6.89631e-11	68.9631			-8.854	-2.51287e-11	-25.1287			8.85328	3.27795e-11	32.7795			-8.85488	-2.14297e-11	-21.4297			8.85416	2.71958e-11	27.1958			-8.85344	-2.01553e-11	-20.1553
				1.14608	2.36807e-12								8.85128	2.08801e-11	20.8801			8.8524	6.76864e-11	67.6864			-8.85168	-2.60514e-11	-26.0514			8.85096	3.2534e-11	32.534			-8.85256	-2.078e-11	-20.78			8.85184	2.76929e-11	27.6929			-8.85112	-2.01661e-11	-20.1661
				1.1484	3.81407e-12								8.84896	2.13223e-11	21.3223			8.85008	6.6846e-11	66.846			-8.84936	-2.4795e-11	-24.795			8.84864	3.19117e-11	31.9117			-8.85024	-2.07407e-11	-20.7407			8.84952	2.61956e-11	26.1956			-8.8488	-2.01291e-11	-20.1291
				1.15072	5.78735e-13								8.84664	2.24417e-11	22.4417			8.84776	6.80631e-11	68.0631			-8.84704	-2.53088e-11	-25.3088			8.84632	3.36164e-11	33.6164			-8.84792	-1.99789e-11	-19.9789			8.8472	2.45565e-11	24.5565			-8.84648	-1.97906e-11	-19.7906
				1.15304	7.00329e-13								8.84432	2.1643e-11	21.643			8.84544	6.87462e-11	68.7462			-8.84472	-2.7079e-11	-27.079			8.844	3.31443e-11	33.1443			-8.8456	-1.89227e-11	-18.9227			8.84488	2.65342e-11	26.5342			-8.84416	-2.07585e-11	-20.7585
				1.15536	2.50396e-12								8.842	2.2847e-11	22.847			8.84312	6.71309e-11	67.1309			-8.8424	-2.84165e-11	-28.4165			8.84168	3.53771e-11	35.3771			-8.84328	-1.89179e-11	-18.9179			8.84256	2.50667e-11	25.0667			-8.84184	-1.9241e-11	-19.241
				1.15768	8.23114e-13								8.83968	2.12794e-11	21.2794			8.8408	6.93792e-11	69.3792			-8.84008	-2.74045e-11	-27.4045			8.83936	3.27772e-11	32.7772			-8.84096	-2.09135e-11	-20.9135			8.84024	2.53194e-11	25.3194			-8.83952	-2.18982e-11	-21.8982
				1.16	6.09729e-13								8.83736	2.02828e-11	20.2828			8.83848	6.70987e-11	67.0987			-8.83776	-2.51335e-11	-25.1335			8.83704	3.50374e-11	35.0374			-8.83864	-2.08849e-11	-20.8849			8.83792	2.68799e-11	26.8799			-8.8372	-2.04569e-11	-20.4569
				1.16232	2.2119e-12								8.83504	2.05713e-11	20.5713			8.83616	6.84851e-11	68.4851			-8.83544	-2.50536e-11	-25.0536			8.83472	3.55035e-11	35.5035			-8.83632	-1.95569e-11	-19.5569			8.8356	2.73138e-11	27.3138			-8.83488	-2.2611e-11	-22.611
				1.16464	8.33843e-13								8.83272	2.19673e-11	21.9673			8.83384	6.58756e-11	65.8756			-8.83312	-2.75451e-11	-27.5451			8.8324	3.49563e-11	34.9563			-8.834	-2.07657e-11	-20.7657			8.83328	2.69872e-11	26.9872			-8.83256	-2.24847e-11	-22.4847
				1.16696	1.2475e-12								8.8304	2.22021e-11	22.2021			8.83152	6.8497e-11	68.497			-8.8308	-2.66105e-11	-26.6105			8.83008	3.41457e-11	34.1457			-8.83168	-1.87224e-11	-18.7224			8.83096	2.41834e-11	24.1834			-8.83024	-2.13915e-11	-21.3915
				1.16928	1.43347e-12								8.82808	2.05451e-11	20.5451			8.8292	6.70629e-11	67.0629			-8.82848	-2.6086e-11	-26.086			8.82776	3.5569e-11	35.569			-8.82936	-2.11793e-11	-21.1793			8.82864	2.61837e-11	26.1837			-8.82792	-2.22606e-11	-22.2606
				1.1716	1.86381e-12								8.82576	1.99753e-11	19.9753			8.82688	6.59913e-11	65.9913			-8.82616	-2.50751e-11	-25.0751			8.82544	3.54236e-11	35.4236			-8.82704	-2.04653e-11	-20.4653			8.82632	2.90173e-11	29.0173			-8.8256	-2.17492e-11	-21.7492
				1.17392	1.32141e-12								8.82344	2.28959e-11	22.8959			8.82456	6.75112e-11	67.5112			-8.82384	-2.65509e-11	-26.5509			8.82312	3.39144e-11	33.9144			-8.82472	-2.07871e-11	-20.7871			8.824	2.77775e-11	27.7775			-8.82328	-2.23333e-11	-22.3333
				1.17624	1.15571e-12								8.82112	2.343e-11	23.43			8.82224	6.80488e-11	68.0488			-8.82152	-2.52146e-11	-25.2146			8.8208	3.34757e-11	33.4757			-8.8224	-1.88619e-11	-18.8619			8.82168	2.75391e-11	27.5391			-8.82096	-2.11436e-11	-21.1436
				1.17856	9.13713e-13								8.8188	2.0892e-11	20.892			8.81992	6.71428e-11	67.1428			-8.8192	-2.49559e-11	-24.9559			8.81848	3.28594e-11	32.8594			-8.82008	-2.00874e-11	-20.0874			8.81936	2.60216e-11	26.0216			-8.81864	-2.33895e-11	-23.3895
				1.18088	8.98216e-13								8.81648	2.06214e-11	20.6214			8.8176	6.78831e-11	67.8831			-8.81688	-2.62207e-11	-26.2207			8.81616	3.46404e-11	34.6404			-8.81776	-2.01196e-11	-20.1196			8.81704	2.39938e-11	23.9938			-8.81632	-2.32393e-11	-23.2393
				1.1832	3.98454e-12								8.81416	2.13974e-11	21.3974			8.81528	6.75922e-11	67.5922			-8.81456	-2.73663e-11	-27.3663			8.81384	3.48609e-11	34.8609			-8.81544	-2.06369e-11	-20.6369			8.81472	2.54851e-11	25.4851			-8.814	-2.27946e-11	-22.7946
				1.18552	1.63135e-12								8.81184	2.15262e-11	21.5262			8.81296	6.64741e-11	66.4741			-8.81224	-2.73961e-11	-27.3961			8.81152	3.51792e-11	35.1792			-8.81312	-2.05094e-11	-20.5094			8.8124	2.58976e-11	25.8976			-8.81168	-2.10721e-11	-21.0721
				1.18784	1.65877e-12								8.80952	2.14737e-11	21.4737			8.81064	6.61701e-11	66.1701			-8.80992	-2.55233e-11	-25.5233			8.8092	3.53068e-11	35.3068			-8.8108	-2.06608e-11	-20.6608			8.81008	2.55531e-11	25.5531			-8.80936	-2.12187e-11	-21.2187
				1.19016	1.60036e-12								8.8072	2.05952e-11	20.5952			8.80832	6.56396e-11	65.6396			-8.8076	-2.54458e-11	-25.4458			8.80688	3.41612e-11	34.1612			-8.80848	-2.03985e-11	-20.3985			8.80776	2.56544e-11	25.6544			-8.80704	-2.13796e-11	-21.3796
				1.19248	6.26419e-13								8.80488	2.12496e-11	21.2496			8.806	6.69676e-11	66.9676			-8.80528	-2.53588e-11	-25.3588			8.80456	3.44115e-11	34.4115			-8.80616	-1.95176e-11	-19.5176			8.80544	2.40677e-11	24.0677			-8.80472	-1.9725e-11	-19.725
				1.1948	1.13425e-12								8.80256	2.05606e-11	20.5606			8.80368	6.71595e-11	67.1595			-8.80296	-2.7892e-11	-27.892			8.80224	3.21191e-11	32.1191			-8.80384	-1.96129e-11	-19.6129			8.80312	2.56711e-11	25.6711			-8.8024	-1.99431e-11	-19.9431
				1.19712	1.9401e-12								8.80024	2.13557e-11	21.3557			8.80136	6.68484e-11	66.8484			-8.80064	-2.42299e-11	-24.2299			8.79992	3.41886e-11	34.1886			-8.80152	-1.78296e-11	-17.8296			8.8008	2.59834e-11	25.9834			-8.80008	-2.07299e-11	-20.7299
				1.19944	1.65162e-12								8.79792	2.17098e-11	21.7098			8.79904	6.75124e-11	67.5124			-8.79832	-2.48331e-11	-24.8331			8.7976	3.3825e-11	33.825			-8.7992	-1.93852e-11	-19.3852			8.79848	2.41595e-11	24.1595			-8.79776	-2.26408e-11	-22.6408
				1.20176	3.61857e-12								8.7956	2.16084e-11	21.6084			8.79672	6.59698e-11	65.9698			-8.796	-2.43277e-11	-24.3277			8.79528	3.29071e-11	32.9071			-8.79688	-2.03675e-11	-20.3675			8.79616	2.55614e-11	25.5614			-8.79544	-2.0122e-11	-20.122
				1.20408	3.76878e-12								8.79328	2.09123e-11	20.9123			8.7944	6.52903e-11	65.2903			-8.79368	-2.59179e-11	-25.9179			8.79296	3.23838e-11	32.3838			-8.79456	-2.04236e-11	-20.4236			8.79384	2.68215e-11	26.8215			-8.79312	-2.18493e-11	-21.8493
				1.2064	2.04418e-13								8.79096	1.99014e-11	19.9014			8.79208	6.64323e-11	66.4323			-8.79136	-2.66689e-11	-26.6689			8.79064	3.26818e-11	32.6818			-8.79224	-1.96177e-11	-19.6177			8.79152	2.63768e-11	26.3768			-8.7908	-2.29711e-11	-22.9711
				1.20872	1.08895e-12								8.78864	1.97094e-11	19.7094			8.78976	6.76053e-11	67.6053			-8.78904	-2.62171e-11	-26.2171			8.78832	3.32564e-11	33.2564			-8.78992	-2.01446e-11	-20.1446			8.7892	2.51943e-11	25.1943			-8.78848	-2.08777e-11	-20.8777
				1.21104	6.71718e-13								8.78632	2.01457e-11	20.1457			8.78744	6.56777e-11	65.6777			-8.78672	-2.58762e-11	-25.8762			8.786	3.2174e-11	32.174			-8.7876	-1.99777e-11	-19.9777			8.78688	2.65938e-11	26.5938			-8.78616	-2.11424e-11	-21.1424
				1.21336	1.4585e-12								8.784	2.08205e-11	20.8205			8.78512	6.64979e-11	66.4979			-8.7844	-2.67369e-11	-26.7369			8.78368	3.20106e-11	32.0106			-8.78528	-2.04045e-11	-20.4045			8.78456	2.67845e-11	26.7845			-8.78384	-2.15e-11	-21.5
				1.21568	1.93689e-13								8.78168	2.16979e-11	21.6979			8.7828	6.62929e-11	66.2929			-8.78208	-2.69252e-11	-26.9252			8.78136	3.31491e-11	33.1491			-8.78296	-1.74982e-11	-17.4982			8.78224	2.64257e-11	26.4257			-8.78152	-2.12211e-11	-21.2211
				1.218	5.27475e-13								8.77936	2.12198e-11	21.2198			8.78048	6.68508e-11	66.8508			-8.77976	-2.64055e-11	-26.4055			8.77904	3.4762e-11	34.762			-8.78064	-1.89322e-11	-18.9322			8.77992	2.76512e-11	27.6512			-8.7792	-1.86116e-11	-18.6116
				1.22032	2.99785e-13								8.77704	2.27946e-11	22.7946			8.77816	6.66815e-11	66.6815			-8.77744	-2.7327e-11	-27.327			8.77672	3.39156e-11	33.9156			-8.77832	-2.00731e-11	-20.0731			8.7776	2.81602e-11	28.1602			-8.77688	-1.975e-11	-19.75
				1.22264	1.40843e-12								8.77472	2.21294e-11	22.1294			8.77584	6.7169e-11	67.169			-8.77512	-2.58595e-11	-25.8595			8.7744	3.48717e-11	34.8717			-8.776	-2.10387e-11	-21.0387			8.77528	2.77418e-11	27.7418			-8.77456	-2.04259e-11	-20.4259
				1.22496	1.38101e-12								8.7724	2.17491e-11	21.7491			8.77352	6.72656e-11	67.2656			-8.7728	-2.65914e-11	-26.5914			8.77208	3.4799e-11	34.799			-8.77368	-2.1748e-11	-21.748			8.77296	2.63482e-11	26.3482			-8.77224	-2.36911e-11	-23.6911
				1.22728	-1.97317e-13								8.77008	2.16824e-11	21.6824			8.7712	6.80083e-11	68.0083			-8.77048	-2.61492e-11	-26.1492			8.76976	3.46774e-11	34.6774			-8.77136	-2.19089e-11	-21.9089			8.77064	2.39604e-11	23.9604			-8.76992	-2.18302e-11	-21.8302
				1.2296	2.27866e-12								8.76776	2.03377e-11	20.3377			8.76888	6.61701e-11	66.1701			-8.76816	-2.60431e-11	-26.0431			8.76744	3.51864e-11	35.1864			-8.76904	-2.14213e-11	-21.4213			8.76832	2.57927e-11	25.7927			-8.7676	-2.33168e-11	-23.3168
				1.23192	2.05693e-12								8.76544	2.09802e-11	20.9802			8.76656	6.54262e-11	65.4262			-8.76584	-2.61098e-11	-26.1098			8.76512	3.43936e-11	34.3936			-8.76672	-2.2052e-11	-22.052			8.766	2.49153e-11	24.9153			-8.76528	-2.23571e-11	-22.3571
				1.23424	2.57072e-12								8.76312	1.94007e-11	19.4007			8.76424	6.63489e-11	66.3489			-8.76352	-2.48641e-11	-24.8641			8.7628	3.3713e-11	33.713			-8.7644	-1.99944e-11	-19.9944			8.76368	2.56902e-11	25.6902			-8.76296	-2.1326e-11	-21.326
				1.23656	1.67427e-12								8.7608	2.08157e-11	20.8157			8.76192	6.36548e-11	63.6548			-8.7612	-2.49845e-11	-24.9845			8.76048	3.46559e-11	34.6559			-8.76208	-2.08074e-11	-20.8074			8.76136	2.53564e-11	25.3564			-8.76064	-2.03008e-11	-20.3008
				1.23888	2.09746e-12								8.75848	2.01291e-11	20.1291			8.7596	6.56193e-11	65.6193			-8.75888	-2.53827e-11	-25.3827			8.75816	3.47894e-11	34.7894			-8.75976	-2.04593e-11	-20.4593			8.75904	2.51096e-11	25.1096			-8.75832	-2.06751e-11	-20.6751
				1.2412	2.12763e-13								8.75616	2.19804e-11	21.9804			8.75728	6.55681e-11	65.5681			-8.75656	-2.43503e-11	-24.3503			8.75584	3.51304e-11	35.1304			-8.75744	-2.13021e-11	-21.3021			8.75672	2.52253e-11	25.2253			-8.756	-2.1773e-11	-21.773
				1.24352	2.34661e-12								8.75384	2.09552e-11	20.9552			8.75496	6.42484e-11	64.2484			-8.75424	-2.55233e-11	-25.5233			8.75352	3.33315e-11	33.3315			-8.75512	-2.02686e-11	-20.2686			8.7544	2.47043e-11	24.7043			-8.75368	-2.38425e-11	-23.8425
				1.24584	5.18737e-12								8.75152	2.04915e-11	20.4915			8.75264	6.53225e-11	65.3225			-8.75192	-2.54959e-11	-25.4959			8.7512	3.53378e-11	35.3378			-8.7528	-1.87665e-11	-18.7665			8.75208	2.44063e-11	24.4063			-8.75136	-2.37388e-11	-23.7388
				1.24816	3.48267e-12								8.7492	1.93029e-11	19.3029			8.75032	6.47372e-11	64.7372			-8.7496	-2.66665e-11	-26.6665			8.74888	3.43102e-11	34.3102			-8.75048	-1.97953e-11	-19.7953			8.74976	2.58678e-11	25.8678			-8.74904	-2.13772e-11	-21.3772
				1.25048	4.55317e-12								8.74688	2.03675e-11	20.3675			8.748	6.57898e-11	65.7898			-8.74728	-2.78002e-11	-27.8002			8.74656	3.34865e-11	33.4865			-8.74816	-2.04855e-11	-20.4855			8.74744	2.36708e-11	23.6708			-8.74672	-1.96177e-11	-19.6177
				1.2528	3.60427e-12								8.74456	2.14773e-11	21.4773			8.74568	6.60044e-11	66.0044			-8.74496	-2.68466e-11	-26.8466			8.74424	3.28225e-11	32.8225			-8.74584	-2.04474e-11	-20.4474			8.74512	2.41989e-11	24.1989			-8.7444	-1.93781e-11	-19.3781
				1.25512	3.16558e-12								8.74224	2.17491e-11	21.7491			8.74336	6.36381e-11	63.6381			-8.74264	-2.54029e-11	-25.4029			8.74192	3.46559e-11	34.6559			-8.74352	-2.17885e-11	-21.7885			8.7428	2.55877e-11	25.5877			-8.74208	-2.07109e-11	-20.7109
				1.25744	4.77407e-13								8.73992	2.14213e-11	21.4213			8.74104	6.67125e-11	66.7125			-8.74032	-2.52217e-11	-25.2217			8.7396	3.43877e-11	34.3877			-8.7412	-2.11305e-11	-21.1305			8.74048	2.71672e-11	27.1672			-8.73976	-2.16228e-11	-21.6228
				1.25976	2.21786e-12								8.7376	2.06274e-11	20.6274			8.73872	6.63191e-11	66.3191			-8.738	-2.41667e-11	-24.1667			8.73728	3.39824e-11	33.9824			-8.73888	-1.85412e-11	-18.5412			8.73816	2.57569e-11	25.7569			-8.73744	-2.06644e-11	-20.6644
				1.26208	3.67341e-12								8.73528	2.03007e-11	20.3007			8.7364	6.60056e-11	66.0056			-8.73568	-2.54792e-11	-25.4792			8.73496	3.49146e-11	34.9146			-8.73656	-1.85699e-11	-18.5699			8.73584	2.38818e-11	23.8818			-8.73512	-2.13176e-11	-21.3176
				1.2644	1.78156e-12								8.73296	2.11543e-11	21.1543			8.73408	6.71333e-11	67.1333			-8.73336	-2.57689e-11	-25.7689			8.73264	3.4309e-11	34.309			-8.73424	-1.85782e-11	-18.5782			8.73352	2.42668e-11	24.2668			-8.7328	-2.22427e-11	-22.2427
				1.26672	2.7698e-12								8.73064	2.12246e-11	21.2246			8.73176	6.62285e-11	66.2285			-8.73104	-2.62422e-11	-26.2422			8.73032	3.34423e-11	33.4423			-8.73192	-1.98287e-11	-19.8287			8.7312	2.52133e-11	25.2133			-8.73048	-2.18898e-11	-21.8898
				1.26904	3.08451e-12								8.72832	2.16061e-11	21.6061			8.72944	6.59948e-11	65.9948			-8.72872	-2.60502e-11	-26.0502			8.728	3.33088e-11	33.3088			-8.7296	-2.09052e-11	-20.9052			8.72888	2.52121e-11	25.2121			-8.72816	-2.30783e-11	-23.0783
				1.27136	2.26078e-12								8.726	2.27242e-11	22.7242			8.72712	6.49315e-11	64.9315			-8.7264	-2.66654e-11	-26.6654			8.72568	3.23111e-11	32.3111			-8.72728	-1.98967e-11	-19.8967			8.72656	2.69669e-11	26.9669			-8.72584	-2.14881e-11	-21.4881
				1.27368	2.22025e-12								8.72368	2.19601e-11	21.9601			8.7248	6.39635e-11	63.9635			-8.72408	-2.57808e-11	-25.7808			8.72336	3.29298e-11	32.9298			-8.72496	-2.05332e-11	-20.5332			8.72424	2.68501e-11	26.8501			-8.72352	-2.19709e-11	-21.9709
				1.276	1.93176e-12								8.72136	2.13355e-11	21.3355			8.72248	6.64133e-11	66.4133			-8.72176	-2.35528e-11	-23.5528			8.72104	3.39848e-11	33.9848			-8.72264	-2.05332e-11	-20.5332			8.72192	2.57355e-11	25.7355			-8.7212	-2.08491e-11	-20.8491
				1.27832	4.52373e-13								8.71904	2.10887e-11	21.0887			8.72016	6.51854e-11	65.1854			-8.71944	-2.37352e-11	-23.7352			8.71872	3.51554e-11	35.1554			-8.72032	-1.92935e-11	-19.2935			8.7196	2.54482e-11	25.4482			-8.71888	-2.0451e-11	-20.451
				1.28064	2.08435e-12								8.71672	2.30866e-11	23.0866			8.71784	6.54965e-11	65.4965			-8.71712	-2.63268e-11	-26.3268			8.7164	3.36414e-11	33.6414			-8.718	-1.95748e-11	-19.5748			8.71728	2.559e-11	25.59			-8.71656	-2.23381e-11	-22.3381
				1.28296	5.47741e-13								8.7144	2.10267e-11	21.0267			8.71552	6.4407e-11	64.407			-8.7148	-2.87217e-11	-28.7217			8.71408	3.38393e-11	33.8393			-8.71568	-1.95223e-11	-19.5223			8.71496	2.40296e-11	24.0296			-8.71424	-2.37459e-11	-23.7459
				1.28528	1.79825e-12								8.71208	1.96367e-11	19.6367			8.7132	6.49303e-11	64.9303			-8.71248	-2.68585e-11	-26.8585			8.71176	3.2342e-11	32.342			-8.71336	-1.77354e-11	-17.7354			8.71264	2.69693e-11	26.9693			-8.71192	-1.98919e-11	-19.8919
				1.2876	4.79791e-13								8.70976	1.95974e-11	19.5974			8.71088	6.42925e-11	64.2925			-8.71016	-2.41179e-11	-24.1179			8.70944	3.25638e-11	32.5638			-8.71104	-1.78164e-11	-17.8164			8.71032	2.64173e-11	26.4173			-8.7096	-2.24394e-11	-22.4394
				1.28992	1.86143e-12								8.70744	2.12854e-11	21.2854			8.70856	6.46764e-11	64.6764			-8.70784	-2.58369e-11	-25.8369			8.70712	3.04848e-11	30.4848			-8.70872	-1.75065e-11	-17.5065			8.708	2.62743e-11	26.2743			-8.70728	-2.01887e-11	-20.1887
				1.29224	2.6494e-12								8.70512	2.10601e-11	21.0601			8.70624	6.58542e-11	65.8542			-8.70552	-2.54017e-11	-25.4017			8.7048	3.38846e-11	33.8846			-8.7064	-1.88917e-11	-18.8917			8.70568	2.59799e-11	25.9799			-8.70496	-1.93864e-11	-19.3864
				1.29456	4.14548e-12								8.7028	2.23046e-11	22.3046			8.70392	6.60223e-11	66.0223			-8.7032	-2.58905e-11	-25.8905			8.70248	3.42589e-11	34.2589			-8.70408	-1.88834e-11	-18.8834			8.70336	2.47043e-11	24.7043			-8.70264	-2.26993e-11	-22.6993
				1.29688	3.73301e-12								8.70048	2.17515e-11	21.7515			8.7016	6.52784e-11	65.2784			-8.70088	-2.69324e-11	-26.9324			8.70016	3.42017e-11	34.2017			-8.70176	-1.91218e-11	-19.1218			8.70104	2.6471e-11	26.471			-8.70032	-2.17313e-11	-21.7313
				1.2992	2.02474e-12								8.69816	2.12329e-11	21.2329			8.69928	6.31839e-11	63.1839			-8.69856	-2.40177e-11	-24.0177			8.69784	3.29739e-11	32.9739			-8.69944	-1.90252e-11	-19.0252			8.69872	2.58153e-11	25.8153			-8.698	-2.19506e-11	-21.9506
				1.30152	1.21412e-12								8.69584	2.25061e-11	22.5061			8.69696	6.39087e-11	63.9087			-8.69624	-2.50966e-11	-25.0966			8.69552	3.18545e-11	31.8545			-8.69712	-1.9092e-11	-19.092			8.6964	2.41774e-11	24.1774			-8.69568	-2.15584e-11	-21.5584
				1.30384	1.29161e-12								8.69352	2.1488e-11	21.488			8.69464	6.46645e-11	64.6645			-8.69392	-2.63149e-11	-26.3149			8.6932	3.2354e-11	32.354			-8.6948	-1.70094e-11	-17.0094			8.69408	2.45565e-11	24.5565			-8.69336	-2.168e-11	-21.68
				1.30616	3.73301e-12								8.6912	2.22927e-11	22.2927			8.69232	6.55418e-11	65.5418			-8.6916	-2.49285e-11	-24.9285			8.69088	3.34149e-11	33.4149			-8.69248	-1.71632e-11	-17.1632			8.69176	2.37316e-11	23.7316			-8.69104	-2.06548e-11	-20.6548
				1.30848	2.5588e-12								8.68888	1.98883e-11	19.8883			8.69	6.63989e-11	66.3989			-8.68928	-2.48963e-11	-24.8963			8.68856	3.33398e-11	33.3398			-8.69016	-1.89907e-11	-18.9907			8.68944	2.24703e-11	22.4703			-8.68872	-2.04367e-11	-20.4367
				1.3108	2.36211e-12								8.68656	2.0644e-11	20.644			8.68768	6.7113e-11	67.113			-8.68696	-2.58714e-11	-25.8714			8.68624	3.3527e-11	33.527			-8.68784	-1.85997e-11	-18.5997			8.68712	2.33775e-11	23.3775			-8.6864	-2.03294e-11	-20.3294
				1.31312	1.81136e-12								8.68424	2.07168e-11	20.7168			8.68536	6.67792e-11	66.7792			-8.68464	-2.42991e-11	-24.2991			8.68392	3.27581e-11	32.7581			-8.68552	-1.77354e-11	-17.7354			8.6848	2.53027e-11	25.3027			-8.68408	-1.88166e-11	-18.8166
				1.31544	1.90911e-12								8.68192	2.10553e-11	21.0553			8.68304	6.47646e-11	64.7646			-8.68232	-2.55949e-11	-25.5949			8.6816	3.19296e-11	31.9296			-8.6832	-1.79452e-11	-17.9452			8.68248	2.50894e-11	25.0894			-8.68176	-2.06679e-11	-20.6679
				1.31776	6.10922e-13								8.6796	2.20698e-11	22.0698			8.68072	6.4978e-11	64.978			-8.68	-2.5869e-11	-25.869			8.67928	3.23349e-11	32.3349			-8.68088	-1.78451e-11	-17.8451			8.68016	2.47615e-11	24.7615			-8.67944	-2.11948e-11	-21.1948
				1.32008	3.45764e-12								8.67728	2.1699e-11	21.699			8.6784	6.70975e-11	67.0975			-8.67768	-2.58345e-11	-25.8345			8.67696	3.19284e-11	31.9284			-8.67856	-1.59318e-11	-15.9318			8.67784	2.56306e-11	25.6306			-8.67712	-2.02149e-11	-20.2149
				1.3224	1.24511e-12								8.67496	1.9595e-11	19.595			8.67608	6.54417e-11	65.4417			-8.67536	-2.51788e-11	-25.1788			8.67464	3.20285e-11	32.0285			-8.67624	-1.56409e-11	-15.6409			8.67552	2.41822e-11	24.1822			-8.6748	-2.23512e-11	-22.3512
				1.32472	1.06869e-12								8.67264	2.10041e-11	21.0041			8.67376	6.55371e-11	65.5371			-8.67304	-2.52801e-11	-25.2801			8.67232	3.13931e-11	31.3931			-8.67392	-1.68175e-11	-16.8175			8.6732	2.52753e-11	25.2753			-8.67248	-2.14142e-11	-21.4142
				1.32704	2.60529e-12								8.67032	1.95628e-11	19.5628			8.67144	6.44558e-11	64.4558			-8.67072	-2.62612e-11	-26.2612			8.67	3.21382e-11	32.1382			-8.6716	-1.86545e-11	-18.6545			8.67088	2.45052e-11	24.5052			-8.67016	-2.06179e-11	-20.6179
				1.32936	4.04892e-12								8.668	1.96296e-11	19.6296			8.66912	6.27476e-11	62.7476			-8.6684	-2.57117e-11	-25.7117			8.66768	3.28499e-11	32.8499			-8.66928	-1.88488e-11	-18.8488			8.66856	2.58797e-11	25.8797			-8.66784	-2.09433e-11	-20.9433
				1.33168	3.38373e-12								8.66568	2.05141e-11	20.5141			8.6668	6.42866e-11	64.2866			-8.66608	-2.46221e-11	-24.6221			8.66536	3.27641e-11	32.7641			-8.66696	-1.86736e-11	-18.6736			8.66624	2.5956e-11	25.956			-8.66552	-2.12795e-11	-21.2795
				1.334	3.28717e-12								8.66336	2.21282e-11	22.1282			8.66448	6.31135e-11	63.1135			-8.66376	-2.59155e-11	-25.9155			8.66304	3.2205e-11	32.205			-8.66464	-1.73241e-11	-17.3241			8.66392	2.44719e-11	24.4719			-8.6632	-2.08527e-11	-20.8527
				1.33632	1.8662e-12								8.66104	2.24608e-11	22.4608			8.66216	6.20538e-11	62.0538			-8.66144	-2.6632e-11	-26.632			8.66072	3.37606e-11	33.7606			-8.66232	-1.73742e-11	-17.3742			8.6616	2.37483e-11	23.7483			-8.66088	-2.26468e-11	-22.6468
				1.33864	3.14412e-12								8.65872	2.02208e-11	20.2208			8.65984	6.43915e-11	64.3915			-8.65912	-2.59394e-11	-25.9394			8.6584	3.29536e-11	32.9536			-8.66	-1.78296e-11	-17.8296			8.65928	2.45052e-11	24.5052			-8.65856	-2.32011e-11	-23.2011
				1.34096	2.96888e-12								8.6564	2.01136e-11	20.1136			8.65752	6.31076e-11	63.1076			-8.6568	-2.71887e-11	-27.1887			8.65608	3.18795e-11	31.8795			-8.65768	-1.69128e-11	-16.9128			8.65696	2.42752e-11	24.2752			-8.65624	-2.27815e-11	-22.7815
				1.34328	2.30369e-12								8.65408	2.28768e-11	22.8768			8.6552	6.18344e-11	61.8344			-8.65448	-2.59286e-11	-25.9286			8.65376	3.27855e-11	32.7855			-8.65536	-1.87332e-11	-18.7332			8.65464	2.49606e-11	24.9606			-8.65392	-2.217e-11	-22.17
				1.3456	2.09627e-12								8.65176	2.24739e-11	22.4739			8.65288	6.32149e-11	63.2149			-8.65216	-2.48224e-11	-24.8224			8.65144	3.52114e-11	35.2114			-8.65304	-1.8546e-11	-18.546			8.65232	2.40928e-11	24.0928			-8.6516	-2.06107e-11	-20.6107
				1.34792	2.56834e-12								8.64944	1.9117e-11	19.117			8.65056	6.42448e-11	64.2448			-8.64984	-2.6415e-11	-26.415			8.64912	3.24326e-11	32.4326			-8.65072	-1.81264e-11	-18.1264			8.65	2.31796e-11	23.1796			-8.64928	-2.04438e-11	-20.4438
				1.35024	4.5949e-12								8.64712	2.02316e-11	20.2316			8.64824	6.54751e-11	65.4751			-8.64752	-2.50477e-11	-25.0477			8.6468	3.05408e-11	30.5408			-8.6484	-1.90026e-11	-19.0026			8.64768	2.44552e-11	24.4552			-8.64696	-2.01935e-11	-20.1935
				1.35256	4.2325e-12								8.6448	2.18039e-11	21.8039			8.64592	6.41674e-11	64.1674			-8.6452	-2.55806e-11	-25.5806			8.64448	3.18473e-11	31.8473			-8.64608	-1.93805e-11	-19.3805			8.64536	2.397e-11	23.97			-8.64464	-2.01708e-11	-20.1708
				1.35488	2.57072e-12								8.64248	2.13533e-11	21.3533			8.6436	6.72024e-11	67.2024			-8.64288	-2.55579e-11	-25.5579			8.64216	3.27223e-11	32.7223			-8.64376	-1.81371e-11	-18.1371			8.64304	2.39902e-11	23.9902			-8.64232	-1.99348e-11	-19.9348
				1.3572	7.19402e-13								8.64016	2.07466e-11	20.7466			8.64128	6.36476e-11	63.6476			-8.64056	-2.51204e-11	-25.1204			8.63984	3.18211e-11	31.8211			-8.64144	-1.63585e-11	-16.3585			8.64072	2.44838e-11	24.4838			-8.64	-2.23381e-11	-22.3381
				1.35952	2.19879e-12								8.63784	2.01732e-11	20.1732			8.63896	6.50102e-11	65.0102			-8.63824	-2.60765e-11	-26.0765			8.63752	3.13621e-11	31.3621			-8.63912	-1.7547e-11	-17.547			8.6384	2.47532e-11	24.7532			-8.63768	-2.13641e-11	-21.3641
				1.36184	2.94504e-12								8.63552	2.21735e-11	22.1735			8.63664	6.49994e-11	64.9994			-8.63592	-2.50572e-11	-25.0572			8.6352	3.33661e-11	33.3661			-8.6368	-1.81479e-11	-18.1479			8.63608	2.36612e-11	23.6612			-8.63536	-1.92482e-11	-19.2482
				1.36416	2.90689e-12								8.6332	2.32798e-11	23.2798			8.63432	6.50626e-11	65.0626			-8.6336	-2.51633e-11	-25.1633			8.63288	3.2106e-11	32.106			-8.63448	-1.74386e-11	-17.4386			8.63376	2.523e-11	25.23			-8.63304	-1.9837e-11	-19.837
				1.36648	2.70066e-12								8.63088	2.20948e-11	22.0948			8.632	6.35391e-11	63.5391			-8.63128	-2.56592e-11	-25.6592			8.63056	3.39371e-11	33.9371			-8.63216	-1.81657e-11	-18.1657			8.63144	2.52109e-11	25.2109			-8.63072	-2.23476e-11	-22.3476
				1.3688	2.03309e-12								8.62856	2.14332e-11	21.4332			8.62968	6.60246e-11	66.0246			-8.62896	-2.58249e-11	-25.8249			8.62824	3.42089e-11	34.2089			-8.62984	-1.86485e-11	-18.6485			8.62912	2.52992e-11	25.2992			-8.6284	-2.0898e-11	-20.898
				1.37112	1.83043e-12								8.62624	1.92541e-11	19.2541			8.62736	6.39862e-11	63.9862			-8.62664	-2.4603e-11	-24.603			8.62592	3.55774e-11	35.5774			-8.62752	-1.68342e-11	-16.8342			8.6268	2.43443e-11	24.3443			-8.62608	-2.00159e-11	-20.0159
				1.37344	3.63884e-12								8.62392	1.91122e-11	19.1122			8.62504	6.19489e-11	61.9489			-8.62432	-2.29758e-11	-22.9758			8.6236	3.32802e-11	33.2802			-8.6252	-1.64992e-11	-16.4992			8.62448	2.49272e-11	24.9272			-8.62376	-2.17313e-11	-21.7313
				1.37576	2.1964e-12								8.6216	1.95485e-11	19.5485			8.62272	6.40577e-11	64.0577			-8.622	-2.42931e-11	-24.2931			8.62128	3.21203e-11	32.1203			-8.62288	-1.69343e-11	-16.9343			8.62216	2.64519e-11	26.4519			-8.62144	-2.03568e-11	-20.3568
				1.37808	1.27253e-12								8.61928	2.04211e-11	20.4211			8.6204	6.26439e-11	62.6439			-8.61968	-2.49881e-11	-24.9881			8.61896	3.16745e-11	31.6745			-8.62056	-1.73599e-11	-17.3599			8.61984	2.51394e-11	25.1394			-8.61912	-2.07049e-11	-20.7049
				1.3804	2.41337e-12								8.61696	2.06429e-11	20.6429			8.61808	6.17522e-11	61.7522			-8.61736	-2.59465e-11	-25.9465			8.61664	3.19475e-11	31.9475			-8.61824	-1.77843e-11	-17.7843			8.61752	2.62814e-11	26.2814			-8.6168	-2.21509e-11	-22.1509
				1.38272	2.02594e-12								8.61464	2.06071e-11	20.6071			8.61576	6.43211e-11	64.3211			-8.61504	-2.37984e-11	-23.7984			8.61432	3.27295e-11	32.7295			-8.61592	-1.70583e-11	-17.0583			8.6152	2.3939e-11	23.939			-8.61448	-2.35528e-11	-23.5528
				1.38504	4.95848e-12								8.61232	2.12782e-11	21.2782			8.61344	6.51651e-11	65.1651			-8.61272	-2.58833e-11	-25.8833			8.612	3.19427e-11	31.9427			-8.6136	-1.74278e-11	-17.4278			8.61288	2.36278e-11	23.6278			-8.61216	-2.22498e-11	-22.2498
				1.38736	2.1821e-12								8.61	2.08789e-11	20.8789			8.61112	6.40613e-11	64.0613			-8.6104	-2.5807e-11	-25.807			8.60968	3.22944e-11	32.2944			-8.61128	-1.74135e-11	-17.4135			8.61056	2.35635e-11	23.5635			-8.60984	-2.14011e-11	-21.4011
				1.38968	3.11193e-12								8.60768	1.9657e-11	19.657			8.6088	6.32125e-11	63.2125			-8.60808	-2.58798e-11	-25.8798			8.60736	3.18914e-11	31.8914			-8.60896	-1.80429e-11	-18.0429			8.60824	2.32655e-11	23.2655			-8.60752	-2.02459e-11	-20.2459
				1.392	1.63493e-12								8.60536	1.97512e-11	19.7512			8.60648	6.38538e-11	63.8538			-8.60576	-2.5217e-11	-25.217			8.60504	3.06254e-11	30.6254			-8.60664	-1.70738e-11	-17.0738			8.60592	2.39283e-11	23.9283			-8.6052	-2.02483e-11	-20.2483
				1.39432	2.04501e-12								8.60304	2.04295e-11	20.4295			8.60416	6.38061e-11	63.8061			-8.60344	-2.50548e-11	-25.0548			8.60272	3.18211e-11	31.8211			-8.60432	-1.79214e-11	-17.9214			8.6036	2.37423e-11	23.7423			-8.60288	-2.13868e-11	-21.3868
				1.39664	2.24409e-12								8.60072	1.96963e-11	19.6963			8.60184	6.37275e-11	63.7275			-8.60112	-2.52503e-11	-25.2503			8.6004	3.39561e-11	33.9561			-8.602	-1.85544e-11	-18.5544			8.60128	2.40379e-11	24.0379			-8.60056	-2.32584e-11	-23.2584
				1.39896	2.44198e-12								8.5984	2.00063e-11	20.0063			8.59952	6.31636e-11	63.1636			-8.5988	-2.75785e-11	-27.5785			8.59808	3.31741e-11	33.1741			-8.59968	-1.76674e-11	-17.6674			8.59896	2.4237e-11	24.237			-8.59824	-2.09028e-11	-20.9028
				1.40128	1.60513e-12								8.59608	2.00468e-11	20.0468			8.5972	6.20633e-11	62.0633			-8.59648	-2.59537e-11	-25.9537			8.59576	3.3291e-11	33.291			-8.59736	-1.75876e-11	-17.5876			8.59664	2.50512e-11	25.0512			-8.59592	-2.2524e-11	-22.524
				1.4036	1.90077e-12								8.59376	1.95986e-11	19.5986			8.59488	6.45858e-11	64.5858			-8.59416	-2.58106e-11	-25.8106			8.59344	3.14742e-11	31.4742			-8.59504	-1.88846e-11	-18.8846			8.59432	2.43741e-11	24.3741			-8.5936	-2.12258e-11	-21.2258
				1.40592	2.66967e-12								8.59144	2.07621e-11	20.7621			8.59256	6.49792e-11	64.9792			-8.59184	-2.56211e-11	-25.6211			8.59112	3.1572e-11	31.572			-8.59272	-1.81884e-11	-18.1884			8.592	2.43455e-11	24.3455			-8.59128	-2.21604e-11	-22.1604
				1.40824	4.00123e-12								8.58912	2.14833e-11	21.4833			8.59024	6.30289e-11	63.0289			-8.58952	-2.67309e-11	-26.7309			8.5888	2.99126e-11	29.9126			-8.5904	-1.88667e-11	-18.8667			8.58968	2.35074e-11	23.5074			-8.58896	-1.98871e-11	-19.8871
				1.41056	2.36091e-12								8.5868	2.02995e-11	20.2995			8.58792	6.34855e-11	63.4855			-8.5872	-2.53278e-11	-25.3278			8.58648	3.19689e-11	31.9689			-8.58808	-1.78474e-11	-17.8474			8.58736	2.43133e-11	24.3133			-8.58664	-2.14499e-11	-21.4499
				1.41288	2.40741e-12								8.58448	2.06476e-11	20.6476			8.5856	6.43485e-11	64.3485			-8.58488	-2.68132e-11	-26.8132			8.58416	3.45736e-11	34.5736			-8.58576	-1.75947e-11	-17.5947			8.58504	2.31009e-11	23.1009			-8.58432	-2.10196e-11	-21.0196
				1.4152	3.36466e-12								8.58216	1.91325e-11	19.1325			8.58328	6.437e-11	64.37			-8.58256	-2.36768e-11	-23.6768			8.58184	3.35401e-11	33.5401			-8.58344	-1.74755e-11	-17.4755			8.58272	2.41118e-11	24.1118			-8.582	-2.02149e-11	-20.2149
				1.41752	4.11329e-12								8.57984	2.0644e-11	20.644			8.58096	6.47169e-11	64.7169			-8.58024	-2.17861e-11	-21.7861			8.57952	3.24136e-11	32.4136			-8.58112	-1.77723e-11	-17.7723			8.5804	2.49094e-11	24.9094			-8.57968	-2.16598e-11	-21.6598
				1.41984	1.93414e-12								8.57752	2.05952e-11	20.5952			8.57864	6.43998e-11	64.3998			-8.57792	-2.34097e-11	-23.4097			8.5772	3.16721e-11	31.6721			-8.5788	-1.73015e-11	-17.3015			8.57808	2.39461e-11	23.9461			-8.57736	-2.23083e-11	-22.3083
				1.42216	1.90196e-12								8.5752	2.0321e-11	20.321			8.57632	6.2297e-11	62.297			-8.5756	-2.55448e-11	-25.5448			8.57488	3.2975e-11	32.975			-8.57648	-1.85091e-11	-18.5091			8.57576	2.45577e-11	24.5577			-8.57504	-2.14559e-11	-21.4559
				1.42448	2.2882e-12								8.57288	1.90824e-11	19.0824			8.574	6.32673e-11	63.2673			-8.57328	-2.53624e-11	-25.3624			8.57256	3.22693e-11	32.2693			-8.57416	-1.83291e-11	-18.3291			8.57344	2.40069e-11	24.0069			-8.57272	-1.93411e-11	-19.3411
				1.4268	2.43125e-12								8.57056	1.98239e-11	19.8239			8.57168	6.29657e-11	62.9657			-8.57096	-2.38723e-11	-23.8723			8.57024	3.19773e-11	31.9773			-8.57184	-1.75876e-11	-17.5876			8.57112	2.34598e-11	23.4598			-8.5704	-2.01911e-11	-20.1911
				1.42912	2.17614e-12								8.56824	1.97404e-11	19.7404			8.56936	6.15209e-11	61.5209			-8.56864	-2.4516e-11	-24.516			8.56792	3.30263e-11	33.0263			-8.56952	-1.78582e-11	-17.8582			8.5688	2.17634e-11	21.7634			-8.56808	-2.25133e-11	-22.5133
				1.43144	4.13356e-12								8.56592	2.06166e-11	20.6166			8.56704	6.40267e-11	64.0267			-8.56632	-2.23238e-11	-22.3238			8.5656	3.3912e-11	33.912			-8.5672	-1.99098e-11	-19.9098			8.56648	2.28482e-11	22.8482			-8.56576	-2.23476e-11	-22.3476
				1.43376	2.48251e-12								8.5636	1.96713e-11	19.6713			8.56472	6.44988e-11	64.4988			-8.564	-2.34121e-11	-23.4121			8.56328	3.16268e-11	31.6268			-8.56488	-1.65767e-11	-16.5767			8.56416	2.32678e-11	23.2678			-8.56344	-2.07478e-11	-20.7478
				1.43608	4.23763e-13								8.56128	2.13569e-11	21.3569			8.5624	6.31279e-11	63.1279			-8.56168	-2.62422e-11	-26.2422			8.56096	3.19916e-11	31.9916			-8.56256	-1.64563e-11	-16.4563			8.56184	2.51478e-11	25.1478			-8.56112	-2.27744e-11	-22.7744
				1.4384	1.75533e-12								8.55896	2.00087e-11	20.0087			8.56008	6.35713e-11	63.5713			-8.55936	-2.72626e-11	-27.2626			8.55864	3.31789e-11	33.1789			-8.56024	-1.73897e-11	-17.3897			8.55952	2.60323e-11	26.0323			-8.5588	-2.42371e-11	-24.2371
				1.44072	5.30221e-14								8.55664	2.00993e-11	20.0993			8.55776	6.21563e-11	62.1563			-8.55704	-2.5062e-11	-25.062			8.55632	3.30788e-11	33.0788			-8.55792	-1.91194e-11	-19.1194			8.5572	2.53015e-11	25.3015			-8.55648	-2.11233e-11	-21.1233
				1.44304	2.76503e-12								8.55432	2.10458e-11	21.0458			8.55544	6.26737e-11	62.6737			-8.55472	-2.4181e-11	-24.181			8.554	3.16387e-11	31.6387			-8.5556	-1.77795e-11	-17.7795			8.55488	2.25812e-11	22.5812			-8.55416	-2.11662e-11	-21.1662
				1.44536	2.51589e-12								8.552	2.10207e-11	21.0207			8.55312	6.27237e-11	62.7237			-8.5524	-2.37865e-11	-23.7865			8.55168	3.20989e-11	32.0989			-8.55328	-1.78808e-11	-17.8808			8.55256	2.24286e-11	22.4286			-8.55184	-2.15751e-11	-21.5751
				1.44768	2.90093e-12								8.54968	2.16704e-11	21.6704			8.5508	6.1329e-11	61.329			-8.55008	-2.57951e-11	-25.7951			8.54936	3.07399e-11	30.7399			-8.55096	-1.74719e-11	-17.4719			8.55024	2.4938e-11	24.938			-8.54952	-2.01375e-11	-20.1375
				1.45	3.96666e-12								8.54736	2.14916e-11	21.4916			8.54848	6.13016e-11	61.3016			-8.54776	-2.68835e-11	-26.8835			8.54704	3.08913e-11	30.8913			-8.54864	-1.88393e-11	-18.8393			8.54792	2.45303e-11	24.5303			-8.5472	-2.16311e-11	-21.6311
				1.45232	1.99733e-12								8.54504	2.23738e-11	22.3738			8.54616	6.25676e-11	62.5676			-8.54544	-2.4733e-11	-24.733			8.54472	3.24982e-11	32.4982			-8.54632	-1.83445e-11	-18.3445			8.5456	2.24679e-11	22.4679			-8.54488	-2.13713e-11	-21.3713
				1.45464	1.51214e-12								8.54272	1.98573e-11	19.8573			8.54384	6.2024e-11	62.024			-8.54312	-2.56568e-11	-25.6568			8.5424	3.0021e-11	30.021			-8.544	-1.70678e-11	-17.0678			8.54328	2.46054e-11	24.6054			-8.54256	-2.03628e-11	-20.3628
				1.45696	1.5634e-12								8.5404	2.0737e-11	20.737			8.54152	6.25306e-11	62.5306			-8.5408	-2.43444e-11	-24.3444			8.54008	3.15183e-11	31.5183			-8.54168	-1.67471e-11	-16.7471			8.54096	2.41726e-11	24.1726			-8.54024	-2.06346e-11	-20.6346
				1.45928	2.46224e-12								8.53808	1.88845e-11	18.8845			8.5392	6.30694e-11	63.0694			-8.53848	-2.43777e-11	-24.3777			8.53776	3.26413e-11	32.6413			-8.53936	-1.87701e-11	-18.7701			8.53864	2.36672e-11	23.6672			-8.53792	-2.05404e-11	-20.5404
				1.4616	3.16081e-12								8.53576	1.94126e-11	19.4126			8.53688	6.18487e-11	61.8487			-8.53616	-2.49118e-11	-24.9118			8.53544	3.38143e-11	33.8143			-8.53704	-1.65946e-11	-16.5946			8.53632	2.35444e-11	23.5444			-8.5356	-1.90336e-11	-19.0336
				1.46392	4.5043e-12								8.53344	2.00885e-11	20.0885			8.53456	6.25223e-11	62.5223			-8.53384	-2.35111e-11	-23.5111			8.53312	3.11178e-11	31.1178			-8.53472	-1.68389e-11	-16.8389			8.534	2.42716e-11	24.2716			-8.53328	-1.84661e-11	-18.4661
				1.46624	3.65672e-12								8.53112	1.83254e-11	18.3254			8.53224	6.10786e-11	61.0786			-8.53152	-2.3275e-11	-23.275			8.5308	3.28213e-11	32.8213			-8.5324	-1.73193e-11	-17.3193			8.53168	2.49237e-11	24.9237			-8.53096	-1.97727e-11	-19.7727
				1.46856	3.81169e-12								8.5288	1.88964e-11	18.8964			8.52992	6.01226e-11	60.1226			-8.5292	-2.43634e-11	-24.3634			8.52848	3.20846e-11	32.0846			-8.53008	-1.70142e-11	-17.0142			8.52936	2.4907e-11	24.907			-8.52864	-1.92327e-11	-19.2327
				1.47088	2.99988e-12								8.52648	2.03687e-11	20.3687			8.5276	6.03801e-11	60.3801			-8.52688	-2.35647e-11	-23.5647			8.52616	3.20583e-11	32.0583			-8.52776	-1.79595e-11	-17.9595			8.52704	2.37363e-11	23.7363			-8.52632	-2.05726e-11	-20.5726
				1.4732	1.06272e-12								8.52416	1.98418e-11	19.8418			8.52528	6.20264e-11	62.0264			-8.52456	-2.42752e-11	-24.2752			8.52384	3.06767e-11	30.6767			-8.52544	-1.7739e-11	-17.739			8.52472	2.50202e-11	25.0202			-8.524	-2.24585e-11	-22.4585
				1.47552	1.43108e-12								8.52184	2.00313e-11	20.0313			8.52296	6.49398e-11	64.9398			-8.52224	-2.63232e-11	-26.3232			8.52152	2.94918e-11	29.4918			-8.52312	-1.73098e-11	-17.3098			8.5224	2.42609e-11	24.2609			-8.52168	-2.28411e-11	-22.8411
				1.47784	1.57652e-12								8.51952	2.09743e-11	20.9743			8.52064	6.38956e-11	63.8956			-8.51992	-2.52122e-11	-25.2122			8.5192	3.11714e-11	31.1714			-8.5208	-1.69617e-11	-16.9617			8.52008	2.51668e-11	25.1668			-8.51936	-2.21211e-11	-22.1211
				1.48016	1.81255e-12								8.5172	1.97595e-11	19.7595			8.51832	6.16818e-11	61.6818			-8.5176	-2.52182e-11	-25.2182			8.51688	3.37189e-11	33.7189			-8.51848	-1.67233e-11	-16.7233			8.51776	2.39688e-11	23.9688			-8.51704	-2.09445e-11	-20.9445
				1.48248	1.71957e-12								8.51488	2.02316e-11	20.2316			8.516	6.2012e-11	62.012			-8.51528	-2.56533e-11	-25.6533			8.51456	3.30585e-11	33.0585			-8.51616	-1.67078e-11	-16.7078			8.51544	2.29877e-11	22.9877			-8.51472	-2.21008e-11	-22.1008
				1.4848	1.59118e-13								8.51256	2.08956e-11	20.8956			8.51368	6.08402e-11	60.8402			-8.51296	-2.31964e-11	-23.1964			8.51224	3.12978e-11	31.2978			-8.51384	-1.53142e-11	-15.3142			8.51312	2.32762e-11	23.2762			-8.5124	-2.1177e-11	-21.177
				1.48712	1.95322e-12								8.51024	2.10327e-11	21.0327			8.51136	6.0448e-11	60.448			-8.51064	-2.28614e-11	-22.8614			8.50992	3.09771e-11	30.9771			-8.51152	-1.66005e-11	-16.6005			8.5108	2.46721e-11	24.6721			-8.51008	-2.01136e-11	-20.1136
				1.48944	2.72689e-12								8.50792	2.12353e-11	21.2353			8.50904	6.08653e-11	60.8653			-8.50832	-2.37316e-11	-23.7316			8.5076	3.24696e-11	32.4696			-8.5092	-1.79619e-11	-17.9619			8.50848	2.49475e-11	24.9475			-8.50776	-2.10005e-11	-21.0005
				1.49176	3.82838e-12								8.5056	2.26038e-11	22.6038			8.50672	6.18499e-11	61.8499			-8.506	-2.56902e-11	-25.6902			8.50528	3.09032e-11	30.9032			-8.50688	-1.67448e-11	-16.7448			8.50616	2.35241e-11	23.5241			-8.50544	-2.00957e-11	-20.0957
				1.49408	1.93534e-12								8.50328	2.1469e-11	21.469			8.5044	6.27392e-11	62.7392			-8.50368	-2.43873e-11	-24.3873			8.50296	3.29226e-11	32.9226			-8.50456	-1.58137e-11	-15.8137			8.50384	2.45529e-11	24.5529			-8.50312	-2.10125e-11	-21.0125
				1.4964	3.18584e-12								8.50096	2.08801e-11	20.8801			8.50208	6.34902e-11	63.4902			-8.50136	-2.52754e-11	-25.2754			8.50064	3.05944e-11	30.5944			-8.50224	-1.64467e-11	-16.4467			8.50152	2.39593e-11	23.9593			-8.5008	-2.10268e-11	-21.0268
				1.49872	3.43022e-12								8.49864	1.8962e-11	18.962			8.49976	6.37179e-11	63.7179			-8.49904	-2.40404e-11	-24.0404			8.49832	3.07423e-11	30.7423			-8.49992	-1.68938e-11	-16.8938			8.4992	2.36934e-11	23.6934			-8.49848	-2.01053e-11	-20.1053
				1.50104	1.3536e-12								8.49632	1.97547e-11	19.7547			8.49744	6.22684e-11	62.2684			-8.49672	-2.51907e-11	-25.1907			8.496	3.00556e-11	30.0556			-8.4976	-1.69653e-11	-16.9653			8.49688	2.36207e-11	23.6207			-8.49616	-2.09624e-11	-20.9624
				1.50336	1.52287e-12								8.494	1.975e-11	19.75			8.49512	6.1211e-11	61.211			-8.4944	-2.13105e-11	-21.3105			8.49368	3.27307e-11	32.7307			-8.49528	-1.63132e-11	-16.3132			8.49456	2.36183e-11	23.6183			-8.49384	-2.29532e-11	-22.9532
				1.50568	2.1523e-12								8.49168	1.92791e-11	19.2791			8.4928	6.15316e-11	61.5316			-8.49208	-2.33847e-11	-23.3847			8.49136	3.10844e-11	31.0844			-8.49296	-1.61678e-11	-16.1678			8.49224	2.38114e-11	23.8114			-8.49152	-2.05523e-11	-20.5523
				1.508	1.47519e-12								8.48936	2.03317e-11	20.3317			8.49048	6.11251e-11	61.1251			-8.48976	-2.34586e-11	-23.4586			8.48904	3.02225e-11	30.2225			-8.49064	-1.64861e-11	-16.4861			8.48992	2.47806e-11	24.7806			-8.4892	-2.21688e-11	-22.1688
				1.51032	2.89497e-12								8.48704	2.06119e-11	20.6119			8.48816	6.05994e-11	60.5994			-8.48744	-2.42371e-11	-24.2371			8.48672	2.89982e-11	28.9982			-8.48832	-1.34272e-11	-13.4272			8.4876	2.45052e-11	24.5052			-8.48688	-2.05189e-11	-20.5189
				1.51264	2.38595e-12								8.48472	1.87677e-11	18.7677			8.48584	6.09582e-11	60.9582			-8.48512	-2.43038e-11	-24.3038			8.4844	3.06052e-11	30.6052			-8.486	-1.48493e-11	-14.8493			8.48528	2.41452e-11	24.1452			-8.48456	-2.02555e-11	-20.2555
				1.51496	2.43602e-12								8.4824	1.79928e-11	17.9928			8.48352	6.07043e-11	60.7043			-8.4828	-2.23917e-11	-22.3917			8.48208	3.18545e-11	31.8545			-8.48368	-1.6554e-11	-16.554			8.48296	2.3722e-11	23.722			-8.48224	-2.09123e-11	-20.9123
				1.51728	1.65281e-12								8.48008	1.97941e-11	19.7941			8.4812	6.07603e-11	60.7603			-8.48048	-2.43277e-11	-24.3277			8.47976	3.20285e-11	32.0285			-8.48136	-1.64062e-11	-16.4062			8.48064	2.38532e-11	23.8532			-8.47992	-2.15131e-11	-21.5131
				1.5196	1.27492e-12								8.47776	1.88344e-11	18.8344			8.47888	6.32316e-11	63.2316			-8.47816	-2.6179e-11	-26.179			8.47744	3.15374e-11	31.5374			-8.47904	-1.6709e-11	-16.709			8.47832	2.35206e-11	23.5206			-8.4776	-2.21187e-11	-22.1187
				1.52192	4.22415e-12								8.47544	1.9471e-11	19.471			8.47656	6.13397e-11	61.3397			-8.47584	-2.38282e-11	-23.8282			8.47512	3.28189e-11	32.8189			-8.47672	-1.66124e-11	-16.6124			8.476	2.44552e-11	24.4552			-8.47528	-2.27684e-11	-22.7684
				1.52424	8.04041e-13								8.47312	1.97047e-11	19.7047			8.47424	6.12241e-11	61.2241			-8.47352	-2.51216e-11	-25.1216			8.4728	3.2317e-11	32.317			-8.4744	-1.8e-11	-18			8.47368	2.29746e-11	22.9746			-8.47296	-2.13319e-11	-21.3319
				1.52656	3.50652e-12								8.4708	2.08407e-11	20.8407			8.47192	6.02966e-11	60.2966			-8.4712	-2.35838e-11	-23.5838			8.47048	3.07065e-11	30.7065			-8.47208	-1.62691e-11	-16.2691			8.47136	2.33119e-11	23.3119			-8.47064	-2.0513e-11	-20.513
				1.52888	3.50652e-12								8.46848	2.11209e-11	21.1209			8.4696	6.10476e-11	61.0476			-8.46888	-2.49082e-11	-24.9082			8.46816	3.20881e-11	32.0881			-8.46976	-1.7522e-11	-17.522			8.46904	2.46459e-11	24.6459			-8.46832	-2.06095e-11	-20.6095
				1.5312	4.05845e-12								8.46616	2.16573e-11	21.6573			8.46728	6.09511e-11	60.9511			-8.46656	-2.40058e-11	-24.0058			8.46584	3.18008e-11	31.8008			-8.46744	-1.46657e-11	-14.6657			8.46672	2.34681e-11	23.4681			-8.466	-2.05583e-11	-20.5583
				1.53352	3.13697e-12								8.46384	2.09158e-11	20.9158			8.46496	6.19369e-11	61.9369			-8.46424	-2.28256e-11	-22.8256			8.46352	3.13991e-11	31.3991			-8.46512	-1.47802e-11	-14.7802			8.4644	2.49546e-11	24.9546			-8.46368	-2.02173e-11	-20.2173
				1.53584	3.05114e-12								8.46152	1.9924e-11	19.924			8.46264	6.1329e-11	61.329			-8.46192	-2.45053e-11	-24.5053			8.4612	3.1361e-11	31.361			-8.4628	-1.51092e-11	-15.1092			8.46208	2.3511e-11	23.511			-8.46136	-1.79512e-11	-17.9512
				1.53816	4.33383e-12								8.4592	2.04569e-11	20.4569			8.46032	6.14899e-11	61.4899			-8.4596	-2.49046e-11	-24.9046			8.45888	2.92378e-11	29.2378			-8.46048	-1.55813e-11	-15.5813			8.45976	2.23261e-11	22.3261			-8.45904	-1.95486e-11	-19.5486
				1.54048	3.33485e-12								8.45688	2.00444e-11	20.0444			8.458	6.23625e-11	62.3625			-8.45728	-2.48271e-11	-24.8271			8.45656	3.01426e-11	30.1426			-8.45816	-1.61571e-11	-16.1571			8.45744	2.26563e-11	22.6563			-8.45672	-2.02996e-11	-20.2996
				1.5428	1.60632e-12								8.45456	1.89596e-11	18.9596			8.45568	6.2775e-11	62.775			-8.45496	-2.45017e-11	-24.5017			8.45424	2.90972e-11	29.0972			-8.45584	-1.61368e-11	-16.1368			8.45512	2.26325e-11	22.6325			-8.4544	-2.01112e-11	-20.1112
				1.54512	-2.00894e-13								8.45224	1.94138e-11	19.4138			8.45336	6.30444e-11	63.0444			-8.45264	-2.56723e-11	-25.6723			8.45192	3.08662e-11	30.8662			-8.45352	-1.71966e-11	-17.1966			8.4528	2.37423e-11	23.7423			-8.45208	-2.0327e-11	-20.327
				1.54744	1.37386e-12								8.44992	2.08205e-11	20.8205			8.45104	6.26868e-11	62.6868			-8.45032	-2.38735e-11	-23.8735			8.4496	3.0325e-11	30.325			-8.4512	-1.70142e-11	-17.0142			8.45048	2.38651e-11	23.8651			-8.44976	-1.81419e-11	-18.1419
				1.54976	3.88322e-12								8.4476	2.09743e-11	20.9743			8.44872	6.22743e-11	62.2743			-8.448	-2.30617e-11	-23.0617			8.44728	2.85417e-11	28.5417			-8.44888	-1.80251e-11	-18.0251			8.44816	2.51597e-11	25.1597			-8.44744	-2.02507e-11	-20.2507
				1.55208	3.33366e-12								8.44528	2.09826e-11	20.9826			8.4464	6.11633e-11	61.1633			-8.44568	-2.31284e-11	-23.1284			8.44496	3.15708e-11	31.5708			-8.44656	-1.78796e-11	-17.8796			8.44584	2.32559e-11	23.2559			-8.44512	-2.00397e-11	-20.0397
				1.5544	1.99971e-12								8.44296	1.8751e-11	18.751			8.44408	5.98341e-11	59.8341			-8.44336	-2.47604e-11	-24.7604			8.44264	3.00246e-11	30.0246			-8.44424	-1.80692e-11	-18.0692			8.44352	2.22999e-11	22.2999			-8.4428	-2.2164e-11	-22.164
				1.55672	2.50993e-12								8.44064	2.02888e-11	20.2888			8.44176	6.06996e-11	60.6996			-8.44104	-2.44385e-11	-24.4385			8.44032	3.16459e-11	31.6459			-8.44192	-1.86771e-11	-18.6771			8.4412	2.3784e-11	23.784			-8.44048	-2.22558e-11	-22.2558
				1.55904	2.17614e-12								8.43832	2.01553e-11	20.1553			8.43944	5.93561e-11	59.3561			-8.43872	-2.32417e-11	-23.2417			8.438	2.92188e-11	29.2188			-8.4396	-1.52713e-11	-15.2713			8.43888	2.17503e-11	21.7503			-8.43816	-2.15119e-11	-21.5119
				1.56136	1.55267e-12								8.436	1.91182e-11	19.1182			8.43712	5.95718e-11	59.5718			-8.4364	-2.4938e-11	-24.938			8.43568	2.90245e-11	29.0245			-8.43728	-1.43558e-11	-14.3558			8.43656	2.26968e-11	22.6968			-8.43584	-2.03556e-11	-20.3556
				1.56368	1.71718e-12								8.43368	1.90443e-11	19.0443			8.4348	6.11168e-11	61.1168			-8.43408	-2.39605e-11	-23.9605			8.43336	3.15124e-11	31.5124			-8.43496	-1.65552e-11	-16.5552			8.43424	2.38746e-11	23.8746			-8.43352	-1.88774e-11	-18.8774
				1.566	4.17051e-12								8.43136	2.10398e-11	21.0398			8.43248	6.15066e-11	61.5066			-8.43176	-2.36458e-11	-23.6458			8.43104	3.15612e-11	31.5612			-8.43264	-1.6411e-11	-16.411			8.43192	2.28542e-11	22.8542			-8.4312	-1.93173e-11	-19.3173
				1.56832	3.84745e-12								8.42904	1.98525e-11	19.8525			8.43016	6.18022e-11	61.8022			-8.42944	-2.37137e-11	-23.7137			8.42872	2.77775e-11	27.7775			-8.43032	-1.72192e-11	-17.2192			8.4296	2.23344e-11	22.3344			-8.42888	-1.92267e-11	-19.2267
				1.57064	5.51317e-13								8.42672	1.89346e-11	18.9346			8.42784	6.06519e-11	60.6519			-8.42712	-2.45482e-11	-24.5482			8.4264	2.95537e-11	29.5537			-8.428	-1.70261e-11	-17.0261			8.42728	2.18492e-11	21.8492			-8.42656	-1.96713e-11	-19.6713
				1.57296	1.91269e-12								8.4244	1.89692e-11	18.9692			8.42552	6.20287e-11	62.0287			-8.4248	-2.42013e-11	-24.2013			8.42408	3.0095e-11	30.095			-8.42568	-1.53214e-11	-15.3214			8.42496	2.2766e-11	22.766			-8.42424	-2.15811e-11	-21.5811
				1.57528	2.32754e-12								8.42208	2.24179e-11	22.4179			8.4232	6.04278e-11	60.4278			-8.42248	-2.4181e-11	-24.181			8.42176	2.88039e-11	28.8039			-8.42336	-1.59747e-11	-15.9747			8.42264	2.32404e-11	23.2404			-8.42192	-2.22904e-11	-22.2904
				1.5776	1.34287e-12								8.41976	2.07787e-11	20.7787			8.42088	6.01285e-11	60.1285			-8.42016	-2.3976e-11	-23.976			8.41944	3.08758e-11	30.8758			-8.42104	-1.63633e-11	-16.3633			8.42032	2.36278e-11	23.6278			-8.4196	-2.01065e-11	-20.1065
				1.57992	1.31902e-12								8.41744	2.00432e-11	20.0432			8.41856	6.16938e-11	61.6938			-8.41784	-2.51717e-11	-25.1717			8.41712	2.73257e-11	27.3257			-8.41872	-1.67126e-11	-16.7126			8.418	2.42513e-11	24.2513			-8.41728	-2.25789e-11	-22.5789
				1.58224	4.17647e-12								8.41512	1.99514e-11	19.9514			8.41624	6.14458e-11	61.4458			-8.41552	-2.40821e-11	-24.0821			8.4148	3.02475e-11	30.2475			-8.4164	-1.5927e-11	-15.927			8.41568	2.31153e-11	23.1153			-8.41496	-2.17623e-11	-21.7623
				1.58456	2.61841e-12								8.4128	1.92529e-11	19.2529			8.41392	6.14577e-11	61.4577			-8.4132	-2.44552e-11	-24.4552			8.41248	2.90292e-11	29.0292			-8.41408	-1.65218e-11	-16.5218			8.41336	2.35814e-11	23.5814			-8.41264	-2.17468e-11	-21.7468
				1.58688	3.38135e-12								8.41048	1.8509e-11	18.509			8.4116	5.90807e-11	59.0807			-8.41088	-2.66558e-11	-26.6558			8.41016	3.09688e-11	30.9688			-8.41176	-1.81896e-11	-18.1896			8.41104	2.27922e-11	22.7922			-8.41032	-2.10995e-11	-21.0995
				1.5892	9.98352e-13								8.40816	1.88511e-11	18.8511			8.40928	6.03121e-11	60.3121			-8.40856	-2.45053e-11	-24.5053			8.40784	3.03226e-11	30.3226			-8.40944	-1.70094e-11	-17.0094			8.40872	2.33263e-11	23.3263			-8.408	-2.19625e-11	-21.9625
				1.59152	2.57072e-12								8.40584	2.12711e-11	21.2711			8.40696	5.943e-11	59.43			-8.40624	-2.51013e-11	-25.1013			8.40552	2.95347e-11	29.5347			-8.40712	-1.48839e-11	-14.8839			8.4064	2.36875e-11	23.6875			-8.40568	-2.31821e-11	-23.1821
				1.59384	3.38135e-12								8.40352	2.11912e-11	21.1912			8.40464	6.12598e-11	61.2598			-8.40392	-2.51931e-11	-25.1931			8.4032	2.98685e-11	29.8685			-8.4048	-1.56933e-11	-15.6933			8.40408	2.39092e-11	23.9092			-8.40336	-2.13498e-11	-21.3498
				1.59616	2.67324e-12								8.4012	2.01779e-11	20.1779			8.40232	6.09344e-11	60.9344			-8.4016	-2.69038e-11	-26.9038			8.40088	2.85095e-11	28.5095			-8.40248	-1.45549e-11	-14.5549			8.40176	2.26479e-11	22.6479			-8.40104	-2.06512e-11	-20.6512
				1.59848	1.28124e-13								8.39888	2.01779e-11	20.1779			8.4	5.87433e-11	58.7433			-8.39928	-2.64687e-11	-26.4687			8.39856	3.22312e-11	32.2312			-8.40016	-1.59973e-11	-15.9973			8.39944	2.16275e-11	21.6275			-8.39872	-2.12389e-11	-21.2389
				1.6008	2.40144e-12								8.39656	2.10792e-11	21.0792			8.39768	5.95122e-11	59.5122			-8.39696	-2.3256e-11	-23.256			8.39624	3.17937e-11	31.7937			-8.39784	-1.65254e-11	-16.5254			8.39712	2.06536e-11	20.6536			-8.3964	-2.06656e-11	-20.6656
				1.60312	3.17034e-12								8.39424	2.01636e-11	20.1636			8.39536	5.69921e-11	56.9921			-8.39464	-2.4485e-11	-24.485			8.39392	3.00938e-11	30.0938			-8.39552	-1.45287e-11	-14.5287			8.3948	2.28768e-11	22.8768			-8.39408	-2.18982e-11	-21.8982
				1.60544	2.39548e-12								8.39192	1.85007e-11	18.5007			8.39304	5.93716e-11	59.3716			-8.39232	-2.46912e-11	-24.6912			8.3916	2.98947e-11	29.8947			-8.3932	-1.64432e-11	-16.4432			8.39248	2.46638e-11	24.6638			-8.39176	-2.26456e-11	-22.6456
				1.60776	1.4132e-12								8.3896	1.9632e-11	19.632			8.39072	6.13993e-11	61.3993			-8.39	-2.61826e-11	-26.1826			8.38928	3.03226e-11	30.3226			-8.39088	-1.71334e-11	-17.1334			8.39016	2.46602e-11	24.6602			-8.38944	-2.19554e-11	-21.9554
				1.61008	2.51112e-12								8.38728	2.02781e-11	20.2781			8.3884	5.81258e-11	58.1258			-8.38768	-2.51669e-11	-25.1669			8.38696	2.90268e-11	29.0268			-8.38856	-1.60712e-11	-16.0712			8.38784	2.27278e-11	22.7278			-8.38712	-2.29913e-11	-22.9913
				1.6124	2.05097e-12								8.38496	2.10136e-11	21.0136			8.38608	5.8642e-11	58.642			-8.38536	-2.61826e-11	-26.1826			8.38464	2.88409e-11	28.8409			-8.38624	-1.70833e-11	-17.0833			8.38552	2.18361e-11	21.8361			-8.3848	-2.13057e-11	-21.3057
				1.61472	4.64496e-12								8.38264	1.9179e-11	19.179			8.38376	5.85884e-11	58.5884			-8.38304	-2.49297e-11	-24.9297			8.38232	2.92045e-11	29.2045			-8.38392	-1.57708e-11	-15.7708			8.3832	2.20388e-11	22.0388			-8.38248	-1.98502e-11	-19.8502
				1.61704	2.92239e-12								8.38032	1.93625e-11	19.3625			8.38144	6.11478e-11	61.1478			-8.38072	-2.47556e-11	-24.7556			8.38	3.07113e-11	30.7113			-8.3816	-1.73742e-11	-17.3742			8.38088	2.09909e-11	20.9909			-8.38016	-1.99956e-11	-19.9956
				1.61936	2.67324e-12								8.378	2.03448e-11	20.3448			8.37912	5.9486e-11	59.486			-8.3784	-2.2654e-11	-22.654			8.37768	3.07566e-11	30.7566			-8.37928	-1.78546e-11	-17.8546			8.37856	2.10327e-11	21.0327			-8.37784	-1.97786e-11	-19.7786
				1.62168	3.9011e-12								8.37568	2.08682e-11	20.8682			8.3768	5.9269e-11	59.269			-8.37608	-2.48772e-11	-24.8772			8.37536	2.94739e-11	29.4739			-8.37696	-1.59353e-11	-15.9353			8.37624	2.2195e-11	22.195			-8.37552	-2.1171e-11	-21.171
				1.624	5.43055e-12								8.37336	1.96522e-11	19.6522			8.37448	5.7916e-11	57.916			-8.37376	-2.45494e-11	-24.5494			8.37304	2.90221e-11	29.0221			-8.37464	-1.48636e-11	-14.8636			8.37392	2.16609e-11	21.6609			-8.3732	-2.04867e-11	-20.4867
				1.62632	3.99408e-12								8.37104	1.99717e-11	19.9717			8.37216	5.9734e-11	59.734			-8.37144	-2.67345e-11	-26.7345			8.37072	3.012e-11	30.12			-8.37232	-1.46777e-11	-14.6777			8.3716	2.29734e-11	22.9734			-8.37088	-2.05332e-11	-20.5332
				1.62864	4.83451e-12								8.36872	2.02614e-11	20.2614			8.36984	5.88065e-11	58.8065			-8.36912	-2.61206e-11	-26.1206			8.3684	3.08019e-11	30.8019			-8.37	-1.56158e-11	-15.6158			8.36928	2.41869e-11	24.1869			-8.36856	-2.18553e-11	-21.8553
				1.63096	2.85086e-12								8.3664	1.81752e-11	18.1752			8.36752	5.78171e-11	57.8171			-8.3668	-2.58178e-11	-25.8178			8.36608	3.13657e-11	31.3657			-8.36768	-1.51211e-11	-15.1211			8.36696	2.41428e-11	24.1428			-8.36624	-2.07967e-11	-20.7967
				1.63328	3.72705e-12								8.36408	1.80286e-11	18.0286			8.3652	5.82546e-11	58.2546			-8.36448	-2.28125e-11	-22.8125			8.36376	3.02154e-11	30.2154			-8.36536	-1.56003e-11	-15.6003			8.36464	2.33167e-11	23.3167			-8.36392	-2.18123e-11	-21.8123
				1.6356	4.05726e-12								8.36176	1.97917e-11	19.7917			8.36288	5.89591e-11	58.9591			-8.36216	-2.52265e-11	-25.2265			8.36144	3.14516e-11	31.4516			-8.36304	-1.51497e-11	-15.1497			8.36232	2.39342e-11	23.9342			-8.3616	-2.08432e-11	-20.8432
				1.63792	3.30982e-12								8.35944	1.94305e-11	19.4305			8.36056	5.99211e-11	59.9211			-8.35984	-2.51276e-11	-25.1276			8.35912	2.90495e-11	29.0495			-8.36072	-1.62655e-11	-16.2655			8.36	2.35682e-11	23.5682			-8.35928	-2.16788e-11	-21.6788
				1.64024	1.23677e-12								8.35712	1.97619e-11	19.7619			8.35824	5.89102e-11	58.9102			-8.35752	-2.46495e-11	-24.6495			8.3568	3.07148e-11	30.7148			-8.3584	-1.60224e-11	-16.0224			8.35768	2.07847e-11	20.7847			-8.35696	-1.80811e-11	-18.0811
				1.64256	1.21054e-12								8.3548	1.94186e-11	19.4186			8.35592	6.02942e-11	60.2942			-8.3552	-2.53517e-11	-25.3517			8.35448	2.99948e-11	29.9948			-8.35608	-1.4537e-11	-14.537			8.35536	2.26372e-11	22.6372			-8.35464	-2.03651e-11	-20.3651
				1.64488	2.18925e-12								8.35248	2.1159e-11	21.159			8.3536	5.95313e-11	59.5313			-8.35288	-2.55746e-11	-25.5746			8.35216	2.84809e-11	28.4809			-8.35376	-1.39588e-11	-13.9588			8.35304	2.3517e-11	23.517			-8.35232	-1.99896e-11	-19.9896
				1.6472	3.77271e-13								8.35016	1.97118e-11	19.7118			8.35128	6.0783e-11	60.783			-8.35056	-2.3914e-11	-23.914			8.34984	3.04883e-11	30.4883			-8.35144	-1.50246e-11	-15.0246			8.35072	2.24e-11	22.4			-8.35	-2.06071e-11	-20.6071
				1.64952	8.13577e-13								8.34784	1.91408e-11	19.1408			8.34896	6.01691e-11	60.1691			-8.34824	-2.49416e-11	-24.9416			8.34752	2.89386e-11	28.9386			-8.34912	-1.75268e-11	-17.5268			8.3484	2.20495e-11	22.0495			-8.34768	-1.91421e-11	-19.1421
				1.65184	3.07379e-12								8.34552	1.87415e-11	18.7415			8.34664	5.92881e-11	59.2881			-8.34592	-2.39879e-11	-23.9879			8.3452	2.90078e-11	29.0078			-8.3468	-1.81765e-11	-18.1765			8.34608	2.27707e-11	22.7707			-8.34536	-2.28459e-11	-22.8459
				1.65416	2.30369e-12								8.3432	1.85805e-11	18.5805			8.34432	5.99593e-11	59.9593			-8.3436	-2.29937e-11	-22.9937			8.34288	2.77513e-11	27.7513			-8.34448	-1.69558e-11	-16.9558			8.34376	2.30115e-11	23.0115			-8.34304	-1.98847e-11	-19.8847
				1.65648	3.07021e-12								8.34088	1.84792e-11	18.4792			8.342	5.86682e-11	58.6682			-8.34128	-2.38079e-11	-23.8079			8.34056	2.93284e-11	29.3284			-8.34216	-1.45036e-11	-14.5036			8.34144	2.20614e-11	22.0614			-8.34072	-1.94544e-11	-19.4544
				1.6588	2.80914e-12								8.33856	1.96367e-11	19.6367			8.33968	5.755e-11	57.55			-8.33896	-2.38377e-11	-23.8377			8.33824	3.17865e-11	31.7865			-8.33984	-1.75208e-11	-17.5208			8.33912	2.24787e-11	22.4787			-8.3384	-2.07871e-11	-20.7871
				1.66112	3.7497e-12								8.33624	1.99371e-11	19.9371			8.33736	5.77968e-11	57.7968			-8.33664	-2.29603e-11	-22.9603			8.33592	2.96145e-11	29.6145			-8.33752	-1.59616e-11	-15.9616			8.3368	2.30247e-11	23.0247			-8.33608	-1.88548e-11	-18.8548
				1.66344	2.45747e-12								8.33392	1.83445e-11	18.3445			8.33504	5.76955e-11	57.6955			-8.33432	-2.34157e-11	-23.4157			8.3336	3.1833e-11	31.833			-8.3352	-1.62047e-11	-16.2047			8.33448	2.23404e-11	22.3404			-8.33376	-1.94508e-11	-19.4508
				1.66576	2.74477e-12								8.3316	1.82134e-11	18.2134			8.33272	5.91212e-11	59.1212			-8.332	-2.24692e-11	-22.4692			8.33128	2.994e-11	29.94			-8.33288	-1.65493e-11	-16.5493			8.33216	2.37268e-11	23.7268			-8.33144	-2.03473e-11	-20.3473
				1.66808	4.22415e-12								8.32928	2.07013e-11	20.7013			8.3304	5.81258e-11	58.1258			-8.32968	-2.58166e-11	-25.8166			8.32896	2.91723e-11	29.1723			-8.33056	-1.49578e-11	-14.9578			8.32984	2.20996e-11	22.0996			-8.32912	-2.12711e-11	-21.2711
				1.6704	3.59831e-12								8.32696	1.95747e-11	19.5747			8.32808	5.68288e-11	56.8288			-8.32736	-2.40177e-11	-24.0177			8.32664	2.91758e-11	29.1758			-8.32824	-1.63454e-11	-16.3454			8.32752	2.36803e-11	23.6803			-8.3268	-2.27732e-11	-22.7732
				1.67272	3.98812e-12								8.32464	1.93923e-11	19.3923			8.32576	5.80722e-11	58.0722			-8.32504	-2.3982e-11	-23.982			8.32432	2.96932e-11	29.6932			-8.32592	-1.66172e-11	-16.6172			8.3252	2.36219e-11	23.6219			-8.32448	-2.11317e-11	-21.1317
				1.67504	4.28495e-12								8.32232	1.9862e-11	19.862			8.32344	5.67442e-11	56.7442			-8.32272	-2.21664e-11	-22.1664			8.322	3.04371e-11	30.4371			-8.3236	-1.44297e-11	-14.4297			8.32288	2.30485e-11	23.0485			-8.32216	-2.18636e-11	-21.8636
				1.67736	3.0261e-12								8.32	1.7696e-11	17.696			8.32112	5.77718e-11	57.7718			-8.3204	-2.1897e-11	-21.897			8.31968	3.12572e-11	31.2572			-8.32128	-1.45453e-11	-14.5453			8.32056	2.14857e-11	21.4857			-8.31984	-2.47866e-11	-24.7866
				1.67968	3.18346e-12								8.31768	2.0085e-11	20.085			8.3188	5.907e-11	59.07			-8.31808	-2.47699e-11	-24.7699			8.31736	3.1746e-11	31.746			-8.31896	-1.33461e-11	-13.3461			8.31824	2.15679e-11	21.5679			-8.31752	-2.33776e-11	-23.3776
				1.682	2.43363e-12								8.31536	2.04247e-11	20.4247			8.31648	5.80531e-11	58.0531			-8.31576	-2.28232e-11	-22.8232			8.31504	2.92784e-11	29.2784			-8.31664	-1.52165e-11	-15.2165			8.31592	2.21354e-11	22.1354			-8.3152	-2.13367e-11	-21.3367
				1.68432	2.45628e-12								8.31304	1.9781e-11	19.781			8.31416	5.92583e-11	59.2583			-8.31344	-2.22832e-11	-22.2832			8.31272	2.78693e-11	27.8693			-8.31432	-1.47897e-11	-14.7897			8.3136	2.38377e-11	23.8377			-8.31288	-2.15298e-11	-21.5298
				1.68664	2.79841e-12								8.31072	1.98775e-11	19.8775			8.31184	5.89627e-11	58.9627			-8.31112	-2.54053e-11	-25.4053			8.3104	3.05587e-11	30.5587			-8.312	-1.49793e-11	-14.9793			8.31128	2.35957e-11	23.5957			-8.31056	-2.30903e-11	-23.0903
				1.68896	2.35138e-12								8.3084	2.03603e-11	20.3603			8.30952	6.02358e-11	60.2358			-8.3088	-2.47425e-11	-24.7425			8.30808	3.15326e-11	31.5326			-8.30968	-1.57815e-11	-15.7815			8.30896	2.41655e-11	24.1655			-8.30824	-2.20758e-11	-22.0758
				1.69128	3.23114e-12								8.30608	1.89715e-11	18.9715			8.3072	5.81091e-11	58.1091			-8.30648	-2.43002e-11	-24.3002			8.30576	3.06111e-11	30.6111			-8.30736	-1.50877e-11	-15.0877			8.30664	2.3331e-11	23.331			-8.30592	-2.14952e-11	-21.4952
				1.6936	3.51844e-12								8.30376	1.93256e-11	19.3256			8.30488	5.6228e-11	56.228			-8.30416	-2.47282e-11	-24.7282			8.30344	2.92438e-11	29.2438			-8.30504	-1.6895e-11	-16.895			8.30432	2.30652e-11	23.0652			-8.3036	-2.06512e-11	-20.6512
				1.69592	2.46105e-12								8.30144	2.01422e-11	20.1422			8.30256	5.70589e-11	57.0589			-8.30184	-2.35278e-11	-23.5278			8.30112	2.81459e-11	28.1459			-8.30272	-1.71072e-11	-17.1072			8.302	2.10052e-11	21.0052			-8.30128	-2.08158e-11	-20.8158
				1.69824	3.50413e-12								8.29912	1.8627e-11	18.627			8.30024	5.84405e-11	58.4405			-8.29952	-2.31844e-11	-23.1844			8.2988	2.95859e-11	29.5859			-8.3004	-1.72729e-11	-17.2729			8.29968	2.21711e-11	22.1711			-8.29896	-1.94448e-11	-19.4448
				1.70056	3.82957e-12								8.2968	2.07525e-11	20.7525			8.29792	5.70076e-11	57.0076			-8.2972	-2.40022e-11	-24.0022			8.29648	2.85703e-11	28.5703			-8.29808	-1.67138e-11	-16.7138			8.29736	2.44301e-11	24.4301			-8.29664	-2.02853e-11	-20.2853
				1.70288	4.08587e-12								8.29448	1.81395e-11	18.1395			8.2956	5.75405e-11	57.5405			-8.29488	-2.41381e-11	-24.1381			8.29416	2.95239e-11	29.5239			-8.29576	-1.68628e-11	-16.8628			8.29504	2.37995e-11	23.7995			-8.29432	-2.06751e-11	-20.6751
				1.7052	3.99766e-12								8.29216	1.93327e-11	19.3327			8.29328	5.89186e-11	58.9186			-8.29256	-2.47914e-11	-24.7914			8.29184	2.9568e-11	29.568			-8.29344	-1.70285e-11	-17.0285			8.29272	2.49523e-11	24.9523			-8.292	-2.07275e-11	-20.7275
				1.70752	2.709e-12								8.28984	1.87593e-11	18.7593			8.29096	5.78683e-11	57.8683			-8.29024	-2.11054e-11	-21.1054			8.28952	3.10844e-11	31.0844			-8.29112	-1.69117e-11	-16.9117			8.2904	2.27314e-11	22.7314			-8.28968	-2.00421e-11	-20.0421
				1.70984	3.29194e-12								8.28752	2.02983e-11	20.2983			8.28864	5.93608e-11	59.3608			-8.28792	-2.03306e-11	-20.3306			8.2872	3.16161e-11	31.6161			-8.2888	-1.66613e-11	-16.6613			8.28808	2.29829e-11	22.9829			-8.28736	-1.98025e-11	-19.8025
				1.71216	2.41933e-12								8.2852	1.93721e-11	19.3721			8.28632	5.73593e-11	57.3593			-8.2856	-2.26921e-11	-22.6921			8.28488	3.07446e-11	30.7446			-8.28648	-1.46204e-11	-14.6204			8.28576	2.26527e-11	22.6527			-8.28504	-1.87487e-11	-18.7487
				1.71448	2.49681e-12								8.28288	1.91122e-11	19.1122			8.284	5.98103e-11	59.8103			-8.28328	-2.46781e-11	-24.6781			8.28256	2.8606e-11	28.606			-8.28416	-1.49435e-11	-14.9435			8.28344	2.12401e-11	21.2401			-8.28272	-1.88738e-11	-18.8738
				1.7168	5.43294e-12								8.28056	1.94972e-11	19.4972			8.28168	5.94932e-11	59.4932			-8.28096	-2.30378e-11	-23.0378			8.28024	3.04419e-11	30.4419			-8.28184	-1.55157e-11	-15.5157			8.28112	2.23559e-11	22.3559			-8.2804	-1.99849e-11	-19.9849
				1.71912	6.04567e-12								8.27824	2.14189e-11	21.4189			8.27936	5.93775e-11	59.3775			-8.27864	-2.3554e-11	-23.554			8.27792	3.17985e-11	31.7985			-8.27952	-1.73539e-11	-17.3539			8.2788	2.26146e-11	22.6146			-8.27808	-2.04641e-11	-20.4641
				1.72144	4.26945e-12								8.27592	1.96331e-11	19.6331			8.27704	5.84441e-11	58.4441			-8.27632	-2.37042e-11	-23.7042			8.2756	2.97564e-11	29.7564			-8.2772	-1.71525e-11	-17.1525			8.27648	2.10076e-11	21.0076			-8.27576	-2.22093e-11	-22.2093
				1.72376	3.77712e-12								8.2736	2.06321e-11	20.6321			8.27472	5.72473e-11	57.2473			-8.274	-2.47139e-11	-24.7139			8.27328	3.07446e-11	30.7446			-8.27488	-1.67805e-11	-16.7805			8.27416	2.23201e-11	22.3201			-8.27344	-2.35552e-11	-23.5552
				1.72608	2.28462e-12								8.27128	1.87951e-11	18.7951			8.2724	5.72496e-11	57.2496			-8.27168	-2.29067e-11	-22.9067			8.27096	2.92784e-11	29.2784			-8.27256	-1.56611e-11	-15.6611			8.27184	2.40427e-11	24.0427			-8.27112	-2.05499e-11	-20.5499
				1.7284	2.84371e-12								8.26896	2.11411e-11	21.1411			8.27008	5.76836e-11	57.6836			-8.26936	-2.2381e-11	-22.381			8.26864	2.90602e-11	29.0602			-8.27024	-1.43248e-11	-14.3248			8.26952	1.94293e-11	19.4293			-8.2688	-2.029e-11	-20.29
				1.73072	3.54943e-12								8.26664	1.97857e-11	19.7857			8.26776	5.77622e-11	57.7622			-8.26704	-2.07514e-11	-20.7514			8.26632	3.00687e-11	30.0687			-8.26792	-1.48255e-11	-14.8255			8.2672	2.05236e-11	20.5236			-8.26648	-1.94735e-11	-19.4735
				1.73304	1.91984e-12								8.26432	1.93721e-11	19.3721			8.26544	5.68551e-11	56.8551			-8.26472	-1.98359e-11	-19.8359			8.264	2.81733e-11	28.1733			-8.2656	-1.57076e-11	-15.7076			8.26488	2.13736e-11	21.3736			-8.26416	-1.89203e-11	-18.9203
				1.73536	5.16591e-12								8.262	2.05868e-11	20.5868			8.26312	5.87898e-11	58.7898			-8.2624	-2.2952e-11	-22.952			8.26168	3.04919e-11	30.4919			-8.26328	-1.57589e-11	-15.7589			8.26256	2.10327e-11	21.0327			-8.26184	-1.99551e-11	-19.9551
				1.73768	5.78103e-12								8.25968	2.06452e-11	20.6452			8.2608	5.81926e-11	58.1926			-8.26008	-2.21068e-11	-22.1068			8.25936	2.90388e-11	29.0388			-8.26096	-1.66053e-11	-16.6053			8.26024	2.04986e-11	20.4986			-8.25952	-2.06524e-11	-20.6524
				1.74	4.35767e-12								8.25736	2.02268e-11	20.2268			8.25848	5.70494e-11	57.0494			-8.25776	-2.14762e-11	-21.4762			8.25704	2.87693e-11	28.7693			-8.25864	-1.64265e-11	-16.4265			8.25792	2.13676e-11	21.3676			-8.2572	-2.0997e-11	-20.997
				1.74232	3.39327e-12								8.25504	1.88488e-11	18.8488			8.25616	5.72306e-11	57.2306			-8.25544	-2.33513e-11	-23.3513			8.25472	2.85917e-11	28.5917			-8.25632	-1.6647e-11	-16.647			8.2556	2.10684e-11	21.0684			-8.25488	-2.16085e-11	-21.6085
				1.74464	1.69215e-12								8.25272	2.00861e-11	20.0861			8.25384	5.42992e-11	54.2992			-8.25312	-2.25204e-11	-22.5204			8.2524	2.68072e-11	26.8072			-8.254	-1.5766e-11	-15.766			8.25328	2.2586e-11	22.586			-8.25256	-2.02734e-11	-20.2734
				1.74696	3.70083e-12								8.2504	2.11328e-11	21.1328			8.25152	5.58597e-11	55.8597			-8.2508	-2.22451e-11	-22.2451			8.25008	2.79778e-11	27.9778			-8.25168	-1.53131e-11	-15.3131			8.25096	2.35671e-11	23.5671			-8.25024	-2.05261e-11	-20.5261
				1.74928	4.41131e-12								8.24808	2.16418e-11	21.6418			8.2492	5.59348e-11	55.9348			-8.24848	-2.19542e-11	-21.9542			8.24776	2.79528e-11	27.9528			-8.24936	-1.54358e-11	-15.4358			8.24864	2.4566e-11	24.566			-8.24792	-2.09815e-11	-20.9815
				1.7516	4.64735e-12								8.24576	1.91265e-11	19.1265			8.24688	5.71853e-11	57.1853			-8.24616	-2.19935e-11	-21.9935			8.24544	2.86144e-11	28.6144			-8.24704	-1.62357e-11	-16.2357			8.24632	2.20924e-11	22.0924			-8.2456	-2.12711e-11	-21.2711
				1.75392	4.29806e-12								8.24344	1.88595e-11	18.8595			8.24456	5.76156e-11	57.6156			-8.24384	-2.42931e-11	-24.2931			8.24312	2.92188e-11	29.2188			-8.24472	-1.62822e-11	-16.2822			8.244	2.18886e-11	21.8886			-8.24328	-1.94723e-11	-19.4723
				1.75624	2.98795e-12								8.24112	1.86783e-11	18.6783			8.24224	5.46854e-11	54.6854			-8.24152	-2.26218e-11	-22.6218			8.2408	2.78562e-11	27.8562			-8.2424	-1.68115e-11	-16.8115			8.24168	2.27552e-11	22.7552			-8.24096	-1.96821e-11	-19.6821
				1.75856	2.76503e-12								8.2388	1.9378e-11	19.378			8.23992	5.6104e-11	56.104			-8.2392	-2.18028e-11	-21.8028			8.23848	2.69812e-11	26.9812			-8.24008	-1.6349e-11	-16.349			8.23936	2.2791e-11	22.791			-8.23864	-1.98823e-11	-19.8823
				1.76088	2.9355e-12								8.23648	1.92004e-11	19.2004			8.2376	5.7643e-11	57.643			-8.23688	-2.18314e-11	-21.8314			8.23616	2.82985e-11	28.2985			-8.23776	-1.60641e-11	-16.0641			8.23704	2.21449e-11	22.1449			-8.23632	-2.28387e-11	-22.8387
				1.7632	1.33452e-12								8.23416	1.94615e-11	19.4615			8.23528	5.88423e-11	58.8423			-8.23456	-2.25371e-11	-22.5371			8.23384	2.90495e-11	29.0495			-8.23544	-1.59139e-11	-15.9139			8.23472	2.1612e-11	21.612			-8.234	-2.1773e-11	-21.773
				1.76552	3.51009e-12								8.23184	1.83958e-11	18.3958			8.23296	5.5533e-11	55.533			-8.23224	-2.34038e-11	-23.4038			8.23152	2.87825e-11	28.7825			-8.23312	-1.48946e-11	-14.8946			8.2324	2.09766e-11	20.9766			-8.23168	-2.12473e-11	-21.2473
				1.76784	3.71632e-12								8.22952	1.71238e-11	17.1238			8.23064	5.50049e-11	55.0049			-8.22992	-2.24072e-11	-22.4072			8.2292	2.80493e-11	28.0493			-8.2308	-1.52058e-11	-15.2058			8.23008	2.17896e-11	21.7896			-8.22936	-2.10363e-11	-21.0363
				1.77016	4.05965e-12								8.2272	1.72704e-11	17.2704			8.22832	5.71233e-11	57.1233			-8.2276	-2.28507e-11	-22.8507			8.22688	2.71004e-11	27.1004			-8.22848	-1.49054e-11	-14.9054			8.22776	2.17229e-11	21.7229			-8.22704	-2.07502e-11	-20.7502
				1.77248	3.2228e-12								8.22488	2.03138e-11	20.3138			8.226	5.67013e-11	56.7013			-8.22528	-2.17551e-11	-21.7551			8.22456	2.95418e-11	29.5418			-8.22616	-1.65099e-11	-16.5099			8.22544	2.22915e-11	22.2915			-8.22472	-2.08384e-11	-20.8384
				1.7748	2.75192e-12								8.22256	1.87796e-11	18.7796			8.22368	5.75953e-11	57.5953			-8.22296	-2.27326e-11	-22.7326			8.22224	2.93034e-11	29.3034			-8.22384	-1.52999e-11	-15.2999			8.22312	2.23118e-11	22.3118			-8.2224	-1.9688e-11	-19.688
				1.77712	3.42188e-12								8.22024	1.75839e-11	17.5839			8.22136	5.71078e-11	57.1078			-8.22064	-2.06822e-11	-20.6822			8.21992	2.95609e-11	29.5609			-8.22152	-1.49828e-11	-14.9828			8.2208	2.18695e-11	21.8695			-8.22008	-1.9812e-11	-19.812
				1.77944	4.89769e-12								8.21792	1.88559e-11	18.8559			8.21904	5.79577e-11	57.9577			-8.21832	-2.24012e-11	-22.4012			8.2176	2.94834e-11	29.4834			-8.2192	-1.46276e-11	-14.6276			8.21848	2.25931e-11	22.5931			-8.21776	-1.99038e-11	-19.9038
				1.78176	3.88679e-12								8.2156	1.95497e-11	19.5497			8.21672	5.70005e-11	57.0005			-8.216	-2.24382e-11	-22.4382			8.21528	3.01903e-11	30.1903			-8.21688	-1.61177e-11	-16.1177			8.21616	2.22641e-11	22.2641			-8.21544	-2.02936e-11	-20.2936
				1.78408	4.10256e-12								8.21328	2.00766e-11	20.0766			8.2144	5.82558e-11	58.2558			-8.21368	-2.30402e-11	-23.0402			8.21296	2.89243e-11	28.9243			-8.21456	-1.57005e-11	-15.7005			8.21384	2.32094e-11	23.2094			-8.21312	-1.98061e-11	-19.8061
				1.7864	2.45986e-12								8.21096	1.84375e-11	18.4375			8.21208	5.83178e-11	58.3178			-8.21136	-2.16288e-11	-21.6288			8.21064	2.92974e-11	29.2974			-8.21224	-1.53667e-11	-15.3667			8.21152	2.15739e-11	21.5739			-8.2108	-2.04796e-11	-20.4796
				1.78872	3.6591e-12								8.20864	1.78939e-11	17.8939			8.20976	5.71292e-11	57.1292			-8.20904	-2.11627e-11	-21.1627			8.20832	2.74509e-11	27.4509			-8.20992	-1.65373e-11	-16.5373			8.2092	2.1792e-11	21.792			-8.20848	-2.16073e-11	-21.6073
				1.79104	1.49665e-12								8.20632	1.86604e-11	18.6604			8.20744	5.53029e-11	55.3029			-8.20672	-2.29889e-11	-22.9889			8.206	2.89398e-11	28.9398			-8.2076	-1.51474e-11	-15.1474			8.20688	2.1941e-11	21.941			-8.20616	-2.11674e-11	-21.1674
				1.79336	3.31697e-12								8.204	1.91241e-11	19.1241			8.20512	5.60409e-11	56.0409			-8.2044	-2.39152e-11	-23.9152			8.20368	2.98851e-11	29.8851			-8.20528	-1.56564e-11	-15.6564			8.20456	2.05975e-11	20.5975			-8.20384	-2.14929e-11	-21.4929
				1.79568	2.88782e-12								8.20168	2.0557e-11	20.557			8.2028	5.49811e-11	54.9811			-8.20208	-2.38413e-11	-23.8413			8.20136	3.05921e-11	30.5921			-8.20296	-1.71179e-11	-17.1179			8.20224	2.06393e-11	20.6393			-8.20152	-2.12938e-11	-21.2938
				1.798	4.53648e-12								8.19936	1.98263e-11	19.8263			8.20048	5.61076e-11	56.1076			-8.19976	-2.21092e-11	-22.1092			8.19904	3.04168e-11	30.4168			-8.20064	-1.80859e-11	-18.0859			8.19992	1.93065e-11	19.3065			-8.1992	-1.85412e-11	-18.5412
				1.80032	2.93431e-12								8.19704	1.92421e-11	19.2421			8.19816	5.56594e-11	55.6594			-8.19744	-2.16276e-11	-21.6276			8.19672	3.18128e-11	31.8128			-8.19832	-1.68854e-11	-16.8854			8.1976	2.01064e-11	20.1064			-8.19688	-2.04903e-11	-20.4903
				1.80264	2.55165e-12								8.19472	1.75994e-11	17.5994			8.19584	5.6203e-11	56.203			-8.19512	-2.23667e-11	-22.3667			8.1944	2.75415e-11	27.5415			-8.196	-1.81216e-11	-18.1216			8.19528	2.0557e-11	20.557			-8.19456	-2.03043e-11	-20.3043
				1.80496	4.20866e-12								8.1924	1.84554e-11	18.4554			8.19352	5.56045e-11	55.6045			-8.1928	-2.28757e-11	-22.8757			8.19208	2.8879e-11	28.879			-8.19368	-1.70511e-11	-17.0511			8.19296	2.36243e-11	23.6243			-8.19224	-2.2505e-11	-22.505
				1.80728	2.64702e-12								8.19008	2.00921e-11	20.0921			8.1912	5.56105e-11	55.6105			-8.19048	-2.16133e-11	-21.6133			8.18976	2.78526e-11	27.8526			-8.19136	-1.73623e-11	-17.3623			8.19064	2.17265e-11	21.7265			-8.18992	-1.9359e-11	-19.359
				1.8096	1.08537e-12								8.18776	1.96844e-11	19.6844			8.18888	5.64235e-11	56.4235			-8.18816	-2.01351e-11	-20.1351			8.18744	2.78312e-11	27.8312			-8.18904	-1.60712e-11	-16.0712			8.18832	2.34538e-11	23.4538			-8.1876	-1.95796e-11	-19.5796
				1.81192	2.53258e-12								8.18544	1.95819e-11	19.5819			8.18656	5.57834e-11	55.7834			-8.18584	-1.97679e-11	-19.7679			8.18512	2.81709e-11	28.1709			-8.18672	-1.66327e-11	-16.6327			8.186	2.27195e-11	22.7195			-8.18528	-2.12986e-11	-21.2986
				1.81424	3.71632e-12								8.18312	1.82301e-11	18.2301			8.18424	5.5049e-11	55.049			-8.18352	-2.18886e-11	-21.8886			8.1828	2.93582e-11	29.3582			-8.1844	-1.58054e-11	-15.8054			8.18368	2.10839e-11	21.0839			-8.18296	-2.07359e-11	-20.7359
				1.81656	2.41337e-12								8.1808	1.78891e-11	17.8891			8.18192	5.47868e-11	54.7868			-8.1812	-2.37888e-11	-23.7888			8.18048	2.8792e-11	28.792			-8.18208	-1.62262e-11	-16.2262			8.18136	2.20626e-11	22.0626			-8.18064	-2.00421e-11	-20.0421
				1.81888	3.24306e-12								8.17848	1.70415e-11	17.0415			8.1796	5.43874e-11	54.3874			-8.17888	-2.25789e-11	-22.5789			8.17816	3.04442e-11	30.4442			-8.17976	-1.58555e-11	-15.8555			8.17904	2.28816e-11	22.8816			-8.17832	-2.11066e-11	-21.1066
				1.8212	3.12385e-12								8.17616	1.75041e-11	17.5041			8.17728	5.52851e-11	55.2851			-8.17656	-2.12485e-11	-21.2485			8.17584	3.10498e-11	31.0498			-8.17744	-1.59544e-11	-15.9544			8.17672	2.23213e-11	22.3213			-8.176	-2.27684e-11	-22.7684
				1.82352	3.96428e-12								8.17384	1.88261e-11	18.8261			8.17496	5.53304e-11	55.3304			-8.17424	-2.09743e-11	-20.9743			8.17352	2.88671e-11	28.8671			-8.17512	-1.71095e-11	-17.1095			8.1744	2.26277e-11	22.6277			-8.17368	-2.23226e-11	-22.3226
				1.82584	2.81152e-12								8.17152	2.02602e-11	20.2602			8.17264	5.55926e-11	55.5926			-8.17192	-2.30402e-11	-23.0402			8.1712	2.87693e-11	28.7693			-8.1728	-1.57255e-11	-15.7255			8.17208	2.32321e-11	23.2321			-8.17136	-1.85591e-11	-18.5591
				1.82816	5.34234e-12								8.1692	2.03222e-11	20.3222			8.17032	5.59622e-11	55.9622			-8.1696	-2.33978e-11	-23.3978			8.16888	2.91007e-11	29.1007			-8.17048	-1.58376e-11	-15.8376			8.16976	2.27457e-11	22.7457			-8.16904	-2.14654e-11	-21.4654
				1.83048	2.76503e-12								8.16688	1.92851e-11	19.2851			8.168	5.65427e-11	56.5427			-8.16728	-2.3734e-11	-23.734			8.16656	2.95406e-11	29.5406			-8.16816	-1.86843e-11	-18.6843			8.16744	2.16883e-11	21.6883			-8.16672	-2.01053e-11	-20.1053
				1.8328	5.44605e-12								8.16456	1.70654e-11	17.0654			8.16568	5.69504e-11	56.9504			-8.16496	-2.22844e-11	-22.2844			8.16424	2.945e-11	29.45			-8.16584	-1.74588e-11	-17.4588			8.16512	2.14153e-11	21.4153			-8.1644	-2.06226e-11	-20.6226
				1.83512	4.36721e-12								8.16224	1.79177e-11	17.9177			8.16336	5.68217e-11	56.8217			-8.16264	-2.24811e-11	-22.4811			8.16192	3.01534e-11	30.1534			-8.16352	-1.62035e-11	-16.2035			8.1628	2.24513e-11	22.4513			-8.16208	-2.04665e-11	-20.4665
				1.83744	4.97279e-12								8.15992	1.83993e-11	18.3993			8.16104	5.90116e-11	59.0116			-8.16032	-2.28185e-11	-22.8185			8.1596	3.05634e-11	30.5634			-8.1612	-1.57398e-11	-15.7398			8.16048	2.17873e-11	21.7873			-8.15976	-2.22653e-11	-22.2653
				1.83976	3.99647e-12								8.1576	1.77151e-11	17.7151			8.15872	5.65356e-11	56.5356			-8.158	-2.04569e-11	-20.4569			8.15728	2.97564e-11	29.7564			-8.15888	-1.59711e-11	-15.9711			8.15816	2.23404e-11	22.3404			-8.15744	-2.02185e-11	-20.2185
				1.84208	3.05233e-12								8.15528	1.78593e-11	17.8593			8.1564	5.6377e-11	56.377			-8.15568	-2.04045e-11	-20.4045			8.15496	2.94071e-11	29.4071			-8.15656	-1.66101e-11	-16.6101			8.15584	2.20817e-11	22.0817			-8.15512	-2.24024e-11	-22.4024
				1.8444	3.30386e-12								8.15296	1.87915e-11	18.7915			8.15408	5.57118e-11	55.7118			-8.15336	-2.15286e-11	-21.5286			8.15264	2.89637e-11	28.9637			-8.15424	-1.67436e-11	-16.7436			8.15352	2.19017e-11	21.9017			-8.1528	-2.20055e-11	-22.0055
				1.84672	3.27644e-12								8.15064	1.91623e-11	19.1623			8.15176	5.55533e-11	55.5533			-8.15104	-2.28244e-11	-22.8244			8.15032	3.00628e-11	30.0628			-8.15192	-1.54525e-11	-15.4525			8.1512	2.00444e-11	20.0444			-8.15048	-2.06012e-11	-20.6012
				1.84904	4.27422e-12								8.14832	1.82432e-11	18.2432			8.14944	5.60647e-11	56.0647			-8.14872	-2.03651e-11	-20.3651			8.148	2.90769e-11	29.0769			-8.1496	-1.7516e-11	-17.516			8.14888	2.15751e-11	21.5751			-8.14816	-2.16168e-11	-21.6168
				1.85136	5.1063e-12								8.146	1.60235e-11	16.0235			8.14712	5.56415e-11	55.6415			-8.1464	-2.21759e-11	-22.1759			8.14568	2.94798e-11	29.4798			-8.14728	-1.65791e-11	-16.5791			8.14656	1.92457e-11	19.2457			-8.14584	-2.26456e-11	-22.6456
				1.85368	4.91676e-12								8.14368	1.98334e-11	19.8334			8.1448	5.47188e-11	54.7188			-8.14408	-2.26563e-11	-22.6563			8.14336	2.83187e-11	28.3187			-8.14496	-1.7038e-11	-17.038			8.14424	2.11924e-11	21.1924			-8.14352	-2.02185e-11	-20.2185
				1.856	3.99408e-12								8.14136	1.99073e-11	19.9073			8.14248	5.43719e-11	54.3719			-8.14176	-2.41059e-11	-24.1059			8.14104	2.93749e-11	29.3749			-8.14264	-1.55014e-11	-15.5014			8.14192	2.22403e-11	22.2403			-8.1412	-2.25073e-11	-22.5073
				1.85832	3.25618e-12								8.13904	2.00861e-11	20.0861			8.14016	5.51146e-11	55.1146			-8.13944	-2.23476e-11	-22.3476			8.13872	3.0002e-11	30.002			-8.14032	-1.59437e-11	-15.9437			8.1396	2.32118e-11	23.2118			-8.13888	-2.08229e-11	-20.8229
				1.86064	2.82702e-12								8.13672	1.82813e-11	18.2813			8.13784	5.45686e-11	54.5686			-8.13712	-2.1407e-11	-21.407			8.1364	3.0114e-11	30.114			-8.138	-1.59699e-11	-15.9699			8.13728	2.21699e-11	22.1699			-8.13656	-2.17515e-11	-21.7515
				1.86296	5.29108e-12								8.1344	1.95235e-11	19.5235			8.13552	5.55283e-11	55.5283			-8.1348	-2.22582e-11	-22.2582			8.13408	2.8339e-11	28.339			-8.13568	-1.6194e-11	-16.194			8.13496	2.38782e-11	23.8782			-8.13424	-2.21426e-11	-22.1426
				1.86528	5.09081e-12								8.13208	2.00206e-11	20.0206			8.1332	5.78099e-11	57.8099			-8.13248	-2.19351e-11	-21.9351			8.13176	2.8798e-11	28.798			-8.13336	-1.57589e-11	-15.7589			8.13264	2.23976e-11	22.3976			-8.13192	-2.20496e-11	-22.0496
				1.8676	4.44469e-12								8.12976	2.18039e-11	21.8039			8.13088	5.54603e-11	55.4603			-8.13016	-2.40571e-11	-24.0571			8.12944	2.79897e-11	27.9897			-8.13104	-1.60057e-11	-16.0057			8.13032	2.21091e-11	22.1091			-8.1296	-2.03496e-11	-20.3496
				1.86992	3.83911e-12								8.12744	2.02387e-11	20.2387			8.12856	5.51063e-11	55.1063			-8.12784	-2.23547e-11	-22.3547			8.12712	2.74044e-11	27.4044			-8.12872	-1.58149e-11	-15.8149			8.128	2.03949e-11	20.3949			-8.12728	-1.83732e-11	-18.3732
				1.87224	5.43294e-12								8.12512	1.96475e-11	19.6475			8.12624	5.47188e-11	54.7188			-8.12552	-2.44564e-11	-24.4564			8.1248	2.58797e-11	25.8797			-8.1264	-1.60951e-11	-16.0951			8.12568	1.9775e-11	19.775			-8.12496	-1.94711e-11	-19.4711
				1.87456	4.91557e-12								8.1228	1.84899e-11	18.4899			8.12392	5.38164e-11	53.8164			-8.1232	-2.34169e-11	-23.4169			8.12248	2.85345e-11	28.5345			-8.12408	-1.42235e-11	-14.2235			8.12336	2.10649e-11	21.0649			-8.12264	-1.89847e-11	-18.9847
				1.87688	4.70338e-12								8.12048	1.93685e-11	19.3685			8.1216	5.48333e-11	54.8333			-8.12088	-2.26647e-11	-22.6647			8.12016	2.92974e-11	29.2974			-8.12176	-1.62524e-11	-16.2524			8.12104	2.14976e-11	21.4976			-8.12032	-1.68115e-11	-16.8115
				1.8792	5.6344e-12								8.11816	1.83922e-11	18.3922			8.11928	5.51086e-11	55.1086			-8.11856	-2.17802e-11	-21.7802			8.11784	2.79253e-11	27.9253			-8.11944	-1.7311e-11	-17.311			8.11872	2.25907e-11	22.5907			-8.118	-1.83553e-11	-18.3553
				1.88152	3.99408e-12								8.11584	1.79261e-11	17.9261			8.11696	5.53888e-11	55.3888			-8.11624	-2.22665e-11	-22.2665			8.11552	2.93654e-11	29.3654			-8.11712	-1.67233e-11	-16.7233			8.1164	2.21663e-11	22.1663			-8.11568	-2.13689e-11	-21.3689
				1.88384	4.52695e-12								8.11352	1.957e-11	19.57			8.11464	5.6079e-11	56.079			-8.11392	-2.05273e-11	-20.5273			8.1132	2.92271e-11	29.2271			-8.1148	-1.60796e-11	-16.0796			8.11408	2.27767e-11	22.7767			-8.11336	-1.92434e-11	-19.2434
				1.88616	4.39105e-12								8.1112	1.85936e-11	18.5936			8.11232	5.5086e-11	55.086			-8.1116	-2.11114e-11	-21.1114			8.11088	2.77334e-11	27.7334			-8.11248	-1.5145e-11	-15.145			8.11176	2.1531e-11	21.531			-8.11104	-1.98871e-11	-19.8871
				1.88848	3.43499e-12								8.10888	1.88869e-11	18.8869			8.11	5.53363e-11	55.3363			-8.10928	-2.15346e-11	-21.5346			8.10856	2.91341e-11	29.1341			-8.11016	-1.79655e-11	-17.9655			8.10944	2.28864e-11	22.8864			-8.10872	-2.05177e-11	-20.5177
				1.8908	3.60069e-12								8.10656	1.95437e-11	19.5437			8.10768	5.49775e-11	54.9775			-8.10696	-2.25872e-11	-22.5872			8.10624	3.09759e-11	30.9759			-8.10784	-1.7615e-11	-17.615			8.10712	2.26325e-11	22.6325			-8.1064	-1.95271e-11	-19.5271
				1.89312	3.58758e-12								8.10424	1.92898e-11	19.2898			8.10536	5.47641e-11	54.7641			-8.10464	-2.21271e-11	-22.1271			8.10392	2.84868e-11	28.4868			-8.10552	-1.52368e-11	-15.2368			8.1048	2.186e-11	21.86			-8.10408	-2.01732e-11	-20.1732
				1.89544	2.95934e-12								8.10192	1.98608e-11	19.8608			8.10304	5.56189e-11	55.6189			-8.10232	-2.13009e-11	-21.3009			8.1016	2.89255e-11	28.9255			-8.1032	-1.49185e-11	-14.9185			8.10248	2.155e-11	21.55			-8.10176	-1.98168e-11	-19.8168
				1.89776	4.67953e-12								8.0996	1.83123e-11	18.3123			8.10072	5.61398e-11	56.1398			-8.1	-1.97715e-11	-19.7715			8.09928	2.91377e-11	29.1377			-8.10088	-1.68664e-11	-16.8664			8.10016	2.16287e-11	21.6287			-8.09944	-1.9514e-11	-19.514
				1.90008	5.03597e-12								8.09728	1.80667e-11	18.0667			8.0984	5.39845e-11	53.9845			-8.09768	-2.29532e-11	-22.9532			8.09696	2.7979e-11	27.979			-8.09856	-1.66065e-11	-16.6065			8.09784	2.16204e-11	21.6204			-8.09712	-1.83517e-11	-18.3517
				1.9024	4.459e-12								8.09496	2.00087e-11	20.0087			8.09608	5.29855e-11	52.9855			-8.09536	-2.14607e-11	-21.4607			8.09464	2.80434e-11	28.0434			-8.09624	-1.68008e-11	-16.8008			8.09552	2.14582e-11	21.4582			-8.0948	-1.85555e-11	-18.5555
				1.90472	5.98845e-12								8.09264	2.15357e-11	21.5357			8.09376	5.45388e-11	54.5388			-8.09304	-2.1922e-11	-21.922			8.09232	3.14671e-11	31.4671			-8.09392	-1.68294e-11	-16.8294			8.0932	1.98596e-11	19.8596			-8.09248	-2.10303e-11	-21.0303
				1.90704	4.12283e-12								8.09032	1.95318e-11	19.5318			8.09144	5.56487e-11	55.6487			-8.09072	-2.20031e-11	-22.0031			8.09	2.8699e-11	28.699			-8.0916	-1.75363e-11	-17.5363			8.09088	2.09385e-11	20.9385			-8.09016	-2.10792e-11	-21.0792
				1.90936	1.92938e-12								8.088	2.01291e-11	20.1291			8.08912	5.55342e-11	55.5342			-8.0884	-2.12199e-11	-21.2199			8.08768	2.91806e-11	29.1806			-8.08928	-1.47754e-11	-14.7754			8.08856	2.06738e-11	20.6738			-8.08784	-2.03246e-11	-20.3246
				1.91168	2.62913e-12								8.08568	1.81704e-11	18.1704			8.0868	5.51671e-11	55.1671			-8.08608	-2.01065e-11	-20.1065			8.08536	2.93642e-11	29.3642			-8.08696	-1.51986e-11	-15.1986			8.08624	2.029e-11	20.29			-8.08552	-2.00063e-11	-20.0063
				1.914	4.71768e-12								8.08336	2.07573e-11	20.7573			8.08448	5.65916e-11	56.5916			-8.08376	-2.06e-11	-20.6			8.08304	2.87848e-11	28.7848			-8.08464	-1.74839e-11	-17.4839			8.08392	2.30771e-11	23.0771			-8.0832	-2.11054e-11	-21.1054
				1.91632	5.96699e-12								8.08104	1.77186e-11	17.7186			8.08216	5.58525e-11	55.8525			-8.08144	-2.21938e-11	-22.1938			8.08072	2.79659e-11	27.9659			-8.08232	-1.6703e-11	-16.703			8.0816	2.20388e-11	22.0388			-8.08088	-2.05487e-11	-20.5487
				1.91864	4.49595e-12								8.07872	1.89394e-11	18.9394			8.07984	5.48643e-11	54.8643			-8.07912	-2.17361e-11	-21.7361			8.0784	2.82353e-11	28.2353			-8.08	-1.47861e-11	-14.7861			8.07928	2.31808e-11	23.1808			-8.07856	-2.07907e-11	-20.7907
				1.92096	2.24409e-12								8.0764	1.75661e-11	17.5661			8.07752	5.47033e-11	54.7033			-8.0768	-2.21735e-11	-22.1735			8.07608	2.88182e-11	28.8182			-8.07768	-1.8031e-11	-18.031			8.07696	2.25144e-11	22.5144			-8.07624	-1.94365e-11	-19.4365
				1.92328	2.82225e-12								8.07408	1.6827e-11	16.827			8.0752	5.36054e-11	53.6054			-8.07448	-2.06799e-11	-20.6799			8.07376	2.97075e-11	29.7075			-8.07536	-1.67853e-11	-16.7853			8.07464	2.28172e-11	22.8172			-8.07392	-1.96356e-11	-19.6356
				1.9256	3.11193e-12								8.07176	1.59794e-11	15.9794			8.07288	5.61338e-11	56.1338			-8.07216	-1.92565e-11	-19.2565			8.07144	2.64054e-11	26.4054			-8.07304	-1.8366e-11	-18.366			8.07232	2.04402e-11	20.4402			-8.0716	-1.92625e-11	-19.2625
				1.92792	4.09541e-12								8.06944	1.70749e-11	17.0749			8.07056	5.57106e-11	55.7106			-8.06984	-2.04474e-11	-20.4474			8.06912	2.67726e-11	26.7726			-8.07072	-1.61976e-11	-16.1976			8.07	2.15798e-11	21.5798			-8.06928	-1.91385e-11	-19.1385
				1.93024	5.83229e-12								8.06712	1.84375e-11	18.4375			8.06824	5.60933e-11	56.0933			-8.06752	-2.07323e-11	-20.7323			8.0668	2.89744e-11	28.9744			-8.0684	-1.56945e-11	-15.6945			8.06768	2.2121e-11	22.121			-8.06696	-1.98931e-11	-19.8931
				1.93256	4.65331e-12								8.0648	2.02721e-11	20.2721			8.06592	5.54639e-11	55.4639			-8.0652	-2.20102e-11	-22.0102			8.06448	2.97194e-11	29.7194			-8.06608	-1.58531e-11	-15.8531			8.06536	2.18874e-11	21.8874			-8.06464	-2.05654e-11	-20.5654
				1.93488	4.07038e-12								8.06248	1.76209e-11	17.6209			8.0636	5.38987e-11	53.8987			-8.06288	-2.32929e-11	-23.2929			8.06216	3.01093e-11	30.1093			-8.06376	-1.59449e-11	-15.9449			8.06304	2.0433e-11	20.433			-8.06232	-2.06512e-11	-20.6512
				1.9372	4.44231e-12								8.06016	1.74194e-11	17.4194			8.06128	5.39857e-11	53.9857			-8.06056	-2.29627e-11	-22.9627			8.05984	2.88087e-11	28.8087			-8.06144	-1.75709e-11	-17.5709			8.06072	2.10839e-11	21.0839			-8.06	-2.02412e-11	-20.2412
				1.93952	5.70235e-12								8.05784	1.81669e-11	18.1669			8.05896	5.51897e-11	55.1897			-8.05824	-2.29365e-11	-22.9365			8.05752	2.78216e-11	27.8216			-8.05912	-1.66351e-11	-16.6351			8.0584	1.97941e-11	19.7941			-8.05768	-2.17039e-11	-21.7039
				1.94184	3.80811e-12								8.05552	1.81299e-11	18.1299			8.05664	5.41299e-11	54.1299			-8.05592	-2.32536e-11	-23.2536			8.0552	2.64626e-11	26.4626			-8.0568	-1.69629e-11	-16.9629			8.05608	1.88726e-11	18.8726			-8.05536	-1.82396e-11	-18.2396
				1.94416	2.81033e-12								8.0532	1.85352e-11	18.5352			8.05432	5.25337e-11	52.5337			-8.0536	-2.27624e-11	-22.7624			8.05288	2.59214e-11	25.9214			-8.05448	-1.58137e-11	-15.8137			8.05376	2.03949e-11	20.3949			-8.05304	-2.06214e-11	-20.6214
				1.94648	1.92222e-12								8.05088	1.89441e-11	18.9441			8.052	5.39046e-11	53.9046			-8.05128	-2.23357e-11	-22.3357			8.05056	2.5385e-11	25.385			-8.05216	-2.02269e-11	-20.2269			8.05144	2.17908e-11	21.7908			-8.05072	-2.08563e-11	-20.8563
				1.9488	8.9464e-13								8.04856	1.94174e-11	19.4174			8.04968	5.24288e-11	52.4288			-8.04896	-2.4063e-11	-24.063			8.04824	2.67821e-11	26.7821			-8.04984	-1.66327e-11	-16.6327			8.04912	2.17312e-11	21.7312			-8.0484	-2.02471e-11	-20.2471
				1.95112	3.32293e-12								8.04624	1.96224e-11	19.6224			8.04736	5.3454e-11	53.454			-8.04664	-2.10744e-11	-21.0744			8.04592	2.79098e-11	27.9098			-8.04752	-1.64312e-11	-16.4312			8.0468	2.18814e-11	21.8814			-8.04608	-1.96022e-11	-19.6022
				1.95344	4.02031e-12								8.04392	1.87367e-11	18.7367			8.04504	5.261e-11	52.61			-8.04432	-2.1891e-11	-21.891			8.0436	2.74545e-11	27.4545			-8.0452	-1.70702e-11	-17.0702			8.04448	2.30545e-11	23.0545			-8.04376	-2.0867e-11	-20.867
				1.95576	5.84421e-12								8.0416	1.88142e-11	18.8142			8.04272	5.39142e-11	53.9142			-8.042	-2.05463e-11	-20.5463			8.04128	2.64877e-11	26.4877			-8.04288	-1.60975e-11	-16.0975			8.04216	2.14785e-11	21.4785			-8.04144	-2.0085e-11	-20.085
				1.95808	5.47108e-12								8.03928	1.94508e-11	19.4508			8.0404	5.27841e-11	52.7841			-8.03968	-2.17015e-11	-21.7015			8.03896	2.8103e-11	28.103			-8.04056	-1.60152e-11	-16.0152			8.03984	2.10267e-11	21.0267			-8.03912	-2.11352e-11	-21.1352
				1.9604	4.28018e-12								8.03696	1.82563e-11	18.2563			8.03808	5.38367e-11	53.8367			-8.03736	-2.28423e-11	-22.8423			8.03664	2.7377e-11	27.377			-8.03824	-1.48553e-11	-14.8553			8.03752	2.12115e-11	21.2115			-8.0368	-2.03234e-11	-20.3234
				1.96272	4.70695e-12								8.03464	1.83552e-11	18.3552			8.03576	5.35816e-11	53.5816			-8.03504	-2.06334e-11	-20.6334			8.03432	2.79528e-11	27.9528			-8.03592	-1.54311e-11	-15.4311			8.0352	2.06011e-11	20.6011			-8.03448	-1.97464e-11	-19.7464
				1.96504	2.71616e-12								8.03232	1.86068e-11	18.6068			8.03344	5.0798e-11	50.798			-8.03272	-2.1258e-11	-21.258			8.032	2.85321e-11	28.5321			-8.0336	-1.43308e-11	-14.3308			8.03288	2.07454e-11	20.7454			-8.03216	-2.01375e-11	-20.1375
				1.96736	5.35903e-12								8.03	1.70308e-11	17.0308			8.03112	5.02473e-11	50.2473			-8.0304	-2.10303e-11	-21.0303			8.02968	2.86692e-11	28.6692			-8.03128	-1.61833e-11	-16.1833			8.03056	2.05761e-11	20.5761			-8.02984	-1.88369e-11	-18.8369
				1.96968	4.6855e-12								8.02768	1.72418e-11	17.2418			8.0288	5.21868e-11	52.1868			-8.02808	-1.9992e-11	-19.992			8.02736	2.96622e-11	29.6622			-8.02896	-1.77688e-11	-17.7688			8.02824	2.20591e-11	22.0591			-8.02752	-1.93864e-11	-19.3864
				1.972	4.25515e-12								8.02536	1.67161e-11	16.7161			8.02648	5.25993e-11	52.5993			-8.02576	-2.05201e-11	-20.5201			8.02504	2.84344e-11	28.4344			-8.02664	-1.60831e-11	-16.0831			8.02592	1.96403e-11	19.6403			-8.0252	-2.16645e-11	-21.6645
				1.97432	2.8759e-12								8.02304	1.73002e-11	17.3002			8.02416	5.31202e-11	53.1202			-8.02344	-2.10625e-11	-21.0625			8.02272	2.80088e-11	28.0088			-8.02432	-1.53214e-11	-15.3214			8.0236	2.32571e-11	23.2571			-8.02288	-2.09385e-11	-20.9385
				1.97664	3.52201e-12								8.02072	1.7963e-11	17.963			8.02184	5.33145e-11	53.3145			-8.02112	-2.32595e-11	-23.2595			8.0204	2.94524e-11	29.4524			-8.022	-1.69844e-11	-16.9844			8.02128	2.19005e-11	21.9005			-8.02056	-1.80275e-11	-18.0275
				1.97896	3.89991e-12								8.0184	1.62369e-11	16.2369			8.01952	5.37854e-11	53.7854			-8.0188	-2.24e-11	-22.4			8.01808	2.85917e-11	28.5917			-8.01968	-1.57792e-11	-15.7792			8.01896	2.2071e-11	22.071			-8.01824	-1.86914e-11	-18.6914
				1.98128	2.57191e-12								8.01608	1.5915e-11	15.915			8.0172	5.47069e-11	54.7069			-8.01648	-1.9601e-11	-19.601			8.01576	2.84439e-11	28.4439			-8.01736	-1.76722e-11	-17.6722			8.01664	2.14821e-11	21.4821			-8.01592	-2.04391e-11	-20.4391
				1.9836	3.13816e-12								8.01376	1.87033e-11	18.7033			8.01488	5.4211e-11	54.211			-8.01416	-1.98144e-11	-19.8144			8.01344	2.90113e-11	29.0113			-8.01504	-1.61737e-11	-16.1737			8.01432	1.96081e-11	19.6081			-8.0136	-2.07871e-11	-20.7871
				1.98592	3.20611e-12								8.01144	1.86175e-11	18.6175			8.01256	5.23036e-11	52.3036			-8.01184	-2.04629e-11	-20.4629			8.01112	2.72804e-11	27.2804			-8.01272	-1.78284e-11	-17.8284			8.012	2.13688e-11	21.3688			-8.01128	-1.88786e-11	-18.8786
				1.98824	3.76639e-12								8.00912	1.95211e-11	19.5211			8.01024	5.16039e-11	51.6039			-8.00952	-2.17992e-11	-21.7992			8.0088	2.66689e-11	26.6689			-8.0104	-1.74076e-11	-17.4076			8.00968	1.97226e-11	19.7226			-8.00896	-1.87809e-11	-18.7809
				1.99056	4.32191e-12								8.0068	1.79487e-11	17.9487			8.00792	5.15312e-11	51.5312			-8.0072	-2.21652e-11	-22.1652			8.00648	2.80279e-11	28.0279			-8.00808	-1.674e-11	-16.74			8.00736	2.03258e-11	20.3258			-8.00664	-2.00528e-11	-20.0528
				1.99288	3.9154e-12								8.00448	1.87641e-11	18.7641			8.0056	5.36531e-11	53.6531			-8.00488	-2.19029e-11	-21.9029			8.00416	2.75904e-11	27.5904			-8.00576	-1.74481e-11	-17.4481			8.00504	2.16478e-11	21.6478			-8.00432	-2.12831e-11	-21.2831
				1.9952	4.77967e-12								8.00216	1.66779e-11	16.6779			8.00328	5.32728e-11	53.2728			-8.00256	-2.03604e-11	-20.3604			8.00184	2.78634e-11	27.8634			-8.00344	-1.58733e-11	-15.8733			8.00272	1.91086e-11	19.1086			-8.002	-2.11317e-11	-21.1317
				1.99752	6.55708e-12								7.99984	1.76233e-11	17.6233			8.00096	5.08624e-11	50.8624			-8.00024	-1.9719e-11	-19.719			7.99952	2.75022e-11	27.5022			-8.00112	-1.7485e-11	-17.485			8.0004	1.96725e-11	19.6725			-7.99968	-2.03628e-11	-20.3628
				1.99984	3.94878e-12								7.99752	1.93947e-11	19.3947			7.99864	5.23597e-11	52.3597			-7.99792	-2.11317e-11	-21.1317			7.9972	2.70635e-11	27.0635			-7.9988	-1.88893e-11	-18.8893			7.99808	2.07704e-11	20.7704			-7.99736	-2.09552e-11	-20.9552
				2.00216	3.85222e-12								7.9952	1.81466e-11	18.1466			7.99632	5.22023e-11	52.2023			-7.9956	-2.13963e-11	-21.3963			7.99488	2.9487e-11	29.487			-7.99648	-1.82313e-11	-18.2313			7.99576	2.30473e-11	23.0473			-7.99504	-2.22594e-11	-22.2594
				2.00448	5.13491e-12								7.99288	1.71894e-11	17.1894			7.994	5.09089e-11	50.9089			-7.99328	-2.1624e-11	-21.624			7.99256	2.88468e-11	28.8468			-7.99416	-1.67352e-11	-16.7352			7.99344	2.13605e-11	21.3605			-7.99272	-1.99443e-11	-19.9443
				2.0068	4.59728e-12								7.99056	1.76626e-11	17.6626			7.99168	5.41717e-11	54.1717			-7.99096	-2.18767e-11	-21.8767			7.99024	2.79444e-11	27.9444			-7.99184	-1.74111e-11	-17.4111			7.99112	2.16073e-11	21.6073			-7.9904	-1.98108e-11	-19.8108
				2.00912	2.64225e-12								7.98824	1.70999e-11	17.0999			7.98936	5.28055e-11	52.8055			-7.98864	-1.9272e-11	-19.272			7.98792	2.84034e-11	28.4034			-7.98952	-1.69772e-11	-16.9772			7.9888	2.13223e-11	21.3223			-7.98808	-2.18946e-11	-21.8946
				2.01144	2.06527e-12								7.98592	1.57207e-11	15.7207			7.98704	5.24324e-11	52.4324			-7.98632	-2.03616e-11	-20.3616			7.9856	2.88027e-11	28.8027			-7.9872	-1.69558e-11	-16.9558			7.98648	2.16907e-11	21.6907			-7.98576	-2.06775e-11	-20.6775
				2.01376	4.32548e-12								7.9836	1.62416e-11	16.2416			7.98472	5.07444e-11	50.7444			-7.984	-1.88214e-11	-18.8214			7.98328	2.69776e-11	26.9776			-7.98488	-1.64062e-11	-16.4062			7.98416	2.23082e-11	22.3082			-7.98344	-1.93447e-11	-19.3447
				2.01608	5.59387e-12								7.98128	1.71011e-11	17.1011			7.9824	5.20831e-11	52.0831			-7.98168	-2.05463e-11	-20.5463			7.98096	2.88218e-11	28.8218			-7.98256	-1.64742e-11	-16.4742			7.98184	2.06631e-11	20.6631			-7.98112	-2.09493e-11	-20.9493
				2.0184	4.71291e-12								7.97896	1.74635e-11	17.4635			7.98008	5.30249e-11	53.0249			-7.97936	-2.04152e-11	-20.4152			7.97864	2.84201e-11	28.4201			-7.98024	-1.59461e-11	-15.9461			7.97952	1.93065e-11	19.3065			-7.9788	-2.08003e-11	-20.8003
				2.02072	4.7749e-12								7.97664	1.76245e-11	17.6245			7.97776	5.24956e-11	52.4956			-7.97704	-2.12044e-11	-21.2044			7.97632	3.04025e-11	30.4025			-7.97792	-1.74397e-11	-17.4397			7.9772	2.08658e-11	20.8658			-7.97648	-1.87248e-11	-18.7248
				2.02304	3.39684e-12								7.97432	1.82789e-11	18.2789			7.97544	5.28913e-11	52.8913			-7.97472	-2.28423e-11	-22.8423			7.974	2.69049e-11	26.9049			-7.9756	-1.65898e-11	-16.5898			7.97488	2.02292e-11	20.2292			-7.97416	-1.90443e-11	-19.0443
				2.02536	4.61635e-12								7.972	1.80143e-11	18.0143			7.97312	5.28103e-11	52.8103			-7.9724	-2.34336e-11	-23.4336			7.97168	2.79397e-11	27.9397			-7.97328	-1.57565e-11	-15.7565			7.97256	2.00146e-11	20.0146			-7.97184	-1.85579e-11	-18.5579
				2.02768	2.07124e-12								7.96968	1.75529e-11	17.5529			7.9708	5.29927e-11	52.9927			-7.97008	-2.25181e-11	-22.5181			7.96936	2.77048e-11	27.7048			-7.97096	-1.62179e-11	-16.2179			7.97024	1.9688e-11	19.688			-7.96952	-2.00874e-11	-20.0874
				2.03	3.95713e-12								7.96736	1.78152e-11	17.8152			7.96848	5.49334e-11	54.9334			-7.96776	-2.01029e-11	-20.1029			7.96704	2.88945e-11	28.8945			-7.96864	-1.51509e-11	-15.1509			7.96792	2.28137e-11	22.8137			-7.9672	-1.89835e-11	-18.9835
				2.03232	3.36585e-12								7.96504	1.75386e-11	17.5386			7.96616	5.38295e-11	53.8295			-7.96544	-2.02459e-11	-20.2459			7.96472	2.60526e-11	26.0526			-7.96632	-1.52642e-11	-15.2642			7.9656	2.2164e-11	22.164			-7.96488	-1.98168e-11	-19.8168
				2.03464	4.52218e-12								7.96272	1.70225e-11	17.0225			7.96384	5.18185e-11	51.8185			-7.96312	-2.28852e-11	-22.8852			7.9624	2.59429e-11	25.9429			-7.964	-1.61082e-11	-16.1082			7.96328	2.17157e-11	21.7157			-7.96256	-1.92946e-11	-19.2946
				2.03696	5.58553e-12								7.9604	1.76853e-11	17.6853			7.96152	5.26124e-11	52.6124			-7.9608	-2.29794e-11	-22.9794			7.96008	2.67166e-11	26.7166			-7.96168	-1.60963e-11	-16.0963			7.96096	2.10815e-11	21.0815			-7.96024	-1.80298e-11	-18.0298
				2.03928	4.15859e-12								7.95808	1.72859e-11	17.2859			7.9592	5.23656e-11	52.3656			-7.95848	-2.25336e-11	-22.5336			7.95776	2.63732e-11	26.3732			-7.95936	-1.78939e-11	-17.8939			7.95864	2.06798e-11	20.6798			-7.95792	-1.81741e-11	-18.1741
				2.0416	4.72603e-12								7.95576	1.92672e-11	19.2672			7.95688	5.40298e-11	54.0298			-7.95616	-2.27052e-11	-22.7052			7.95544	2.78371e-11	27.8371			-7.95704	-1.82003e-11	-18.2003			7.95632	2.00349e-11	20.0349			-7.9556	-1.86771e-11	-18.6771
				2.04392	6.40211e-12								7.95344	1.98239e-11	19.8239			7.95456	5.3882e-11	53.882			-7.95384	-2.17897e-11	-21.7897			7.95312	2.59059e-11	25.9059			-7.95472	-1.57458e-11	-15.7458			7.954	2.1314e-11	21.314			-7.95328	-1.88095e-11	-18.8095
				2.04624	5.20167e-12								7.95112	1.9359e-11	19.359			7.95224	5.20426e-11	52.0426			-7.95152	-2.222e-11	-22.22			7.9508	2.64603e-11	26.4603			-7.9524	-1.77521e-11	-17.7521			7.95168	2.28768e-11	22.8768			-7.95096	-2.01327e-11	-20.1327
				2.04856	5.15518e-12								7.9488	1.69152e-11	16.9152			7.94992	5.2585e-11	52.585			-7.9492	-2.16192e-11	-21.6192			7.94848	2.69216e-11	26.9216			-7.95008	-1.90145e-11	-19.0145			7.94936	2.31093e-11	23.1093			-7.94864	-2.14952e-11	-21.4952
				2.05088	4.68192e-12								7.94648	1.81001e-11	18.1001			7.9476	5.15419e-11	51.5419			-7.94688	-1.94866e-11	-19.4866			7.94616	2.71851e-11	27.1851			-7.94776	-1.95641e-11	-19.5641			7.94704	2.1761e-11	21.761			-7.94632	-2.01887e-11	-20.1887
				2.0532	2.60768e-12								7.94416	1.79106e-11	17.9106			7.94528	5.11402e-11	51.1402			-7.94456	-2.09934e-11	-20.9934			7.94384	2.76142e-11	27.6142			-7.94544	-1.71334e-11	-17.1334			7.94472	2.06011e-11	20.6011			-7.944	-1.93233e-11	-19.3233
				2.05552	3.6901e-12								7.94184	1.86461e-11	18.6461			7.94296	5.17314e-11	51.7314			-7.94224	-2.20806e-11	-22.0806			7.94152	2.94751e-11	29.4751			-7.94312	-1.7696e-11	-17.696			7.9424	1.97142e-11	19.7142			-7.94168	-1.73801e-11	-17.3801
				2.05784	2.61245e-12								7.93952	1.84339e-11	18.4339			7.94064	5.39535e-11	53.9535			-7.93992	-2.0625e-11	-20.625			7.9392	2.94059e-11	29.4059			-7.9408	-1.65504e-11	-16.5504			7.94008	2.17145e-11	21.7145			-7.93936	-1.86378e-11	-18.6378
				2.06016	3.71632e-12								7.9372	1.8124e-11	18.124			7.93832	5.39988e-11	53.9988			-7.9376	-2.09576e-11	-20.9576			7.93688	2.8978e-11	28.978			-7.93848	-1.50007e-11	-15.0007			7.93776	2.23177e-11	22.3177			-7.93704	-1.98144e-11	-19.8144
				2.06248	6.62384e-12								7.93488	2.01291e-11	20.1291			7.936	5.18888e-11	51.8888			-7.93528	-2.13784e-11	-21.3784			7.93456	2.65914e-11	26.5914			-7.93616	-1.5412e-11	-15.412			7.93544	1.99455e-11	19.9455			-7.93472	-1.96797e-11	-19.6797
				2.0648	4.0823e-12								7.93256	1.81907e-11	18.1907			7.93368	5.08851e-11	50.8851			-7.93296	-2.06584e-11	-20.6584			7.93224	2.68072e-11	26.8072			-7.93384	-1.57744e-11	-15.7744			7.93312	1.96176e-11	19.6176			-7.9324	-1.93399e-11	-19.3399
				2.06712	4.88696e-12								7.93024	1.8242e-11	18.242			7.93136	5.08171e-11	50.8171			-7.93064	-2.07454e-11	-20.7454			7.92992	2.80326e-11	28.0326			-7.93152	-1.69868e-11	-16.9868			7.9308	2.18063e-11	21.8063			-7.93008	-1.95784e-11	-19.5784
				2.06944	2.99392e-12								7.92792	1.79118e-11	17.9118			7.92904	5.47975e-11	54.7975			-7.92832	-2.00254e-11	-20.0254			7.9276	2.72983e-11	27.2983			-7.9292	-1.78582e-11	-17.8582			7.92848	2.01577e-11	20.1577			-7.92776	-1.85293e-11	-18.5293
				2.07176	4.86908e-12								7.9256	1.68949e-11	16.8949			7.92672	5.38951e-11	53.8951			-7.926	-1.90968e-11	-19.0968			7.92528	2.63017e-11	26.3017			-7.92688	-1.59985e-11	-15.9985			7.92616	2.06703e-11	20.6703			-7.92544	-1.8366e-11	-18.366
				2.07408	5.17664e-12								7.92328	1.67268e-11	16.7268			7.9244	5.25623e-11	52.5623			-7.92368	-2.09981e-11	-20.9981			7.92296	2.68048e-11	26.8048			-7.92456	-1.62012e-11	-16.2012			7.92384	2.16025e-11	21.6025			-7.92312	-2.09087e-11	-20.9087
				2.0764	5.05981e-12								7.92096	1.77175e-11	17.7175			7.92208	5.21975e-11	52.1975			-7.92136	-2.34992e-11	-23.4992			7.92064	2.81149e-11	28.1149			-7.92224	-1.55551e-11	-15.5551			7.92152	2.09397e-11	20.9397			-7.9208	-2.11352e-11	-21.1352
				2.07872	4.27422e-12								7.91864	1.78545e-11	17.8545			7.91976	5.43183e-11	54.3183			-7.91904	-2.32369e-11	-23.2369			7.91832	2.78252e-11	27.8252			-7.91992	-1.73348e-11	-17.3348			7.9192	2.04557e-11	20.4557			-7.91848	-1.88023e-11	-18.8023
				2.08104	1.88288e-12								7.91632	1.6374e-11	16.374			7.91744	5.4236e-11	54.236			-7.91672	-2.14833e-11	-21.4833			7.916	2.87598e-11	28.7598			-7.9176	-1.67996e-11	-16.7996			7.91688	1.98704e-11	19.8704			-7.91616	-2.13045e-11	-21.3045
				2.08336	2.7996e-12								7.914	1.73336e-11	17.3336			7.91512	5.13893e-11	51.3893			-7.9144	-1.97822e-11	-19.7822			7.91368	2.81685e-11	28.1685			-7.91528	-1.57959e-11	-15.7959			7.91456	2.1047e-11	21.047			-7.91384	-2.20508e-11	-22.0508
				2.08568	3.70202e-12								7.91168	1.90097e-11	19.0097			7.9128	5.45436e-11	54.5436			-7.91208	-2.17217e-11	-21.7217			7.91136	2.86609e-11	28.6609			-7.91296	-1.68163e-11	-16.8163			7.91224	2.04092e-11	20.4092			-7.91152	-1.82361e-11	-18.2361
				2.088	2.26197e-12								7.90936	2.02876e-11	20.2876			7.91048	5.30535e-11	53.0535			-7.90976	-2.06322e-11	-20.6322			7.90904	2.65258e-11	26.5258			-7.91064	-1.75625e-11	-17.5625			7.90992	2.00635e-11	20.0635			-7.9092	-1.86926e-11	-18.6926
				2.09032	2.57311e-12								7.90704	1.66613e-11	16.6613			7.90816	5.32645e-11	53.2645			-7.90744	-2.25681e-11	-22.5681			7.90672	2.70551e-11	27.0551			-7.90832	-1.6436e-11	-16.436			7.9076	2.11411e-11	21.1411			-7.90688	-2.05809e-11	-20.5809
				2.09264	5.81441e-12								7.90472	1.71631e-11	17.1631			7.90584	5.25981e-11	52.5981			-7.90512	-2.17968e-11	-21.7968			7.9044	2.48545e-11	24.8545			-7.906	-1.74767e-11	-17.4767			7.90528	2.10732e-11	21.0732			-7.90456	-1.91814e-11	-19.1814
				2.09496	5.29346e-12								7.9024	1.9229e-11	19.229			7.90352	5.18614e-11	51.8614			-7.9028	-2.22916e-11	-22.2916			7.90208	2.61813e-11	26.1813			-7.90368	-1.81967e-11	-18.1967			7.90296	2.20245e-11	22.0245			-7.90224	-1.92207e-11	-19.2207
				2.09728	4.74868e-12								7.90008	1.83838e-11	18.3838			7.9012	5.26422e-11	52.6422			-7.90048	-2.11829e-11	-21.1829			7.89976	2.6738e-11	26.738			-7.90136	-1.67066e-11	-16.7066			7.90064	2.25895e-11	22.5895			-7.89992	-2.1047e-11	-21.047
				2.0996	5.04431e-12								7.89776	1.84089e-11	18.4089			7.89888	5.1791e-11	51.791			-7.89816	-1.90765e-11	-19.0765			7.89744	2.7737e-11	27.737			-7.89904	-1.51974e-11	-15.1974			7.89832	2.21926e-11	22.1926			-7.8976	-2.02054e-11	-20.2054
				2.10192	6.14104e-12								7.89544	1.93661e-11	19.3661			7.89656	5.37568e-11	53.7568			-7.89584	-2.14511e-11	-21.4511			7.89512	2.75486e-11	27.5486			-7.89672	-1.62918e-11	-16.2918			7.896	2.13843e-11	21.3843			-7.89528	-1.66852e-11	-16.6852
				2.10424	4.98471e-12								7.89312	2.0135e-11	20.135			7.89424	5.20354e-11	52.0354			-7.89352	-2.19697e-11	-21.9697			7.8928	2.57772e-11	25.7772			-7.8944	-1.5896e-11	-15.896			7.89368	2.04855e-11	20.4855			-7.89296	-1.89859e-11	-18.9859
				2.10656	1.98421e-12								7.8908	2.11495e-11	21.1495			7.89192	5.27709e-11	52.7709			-7.8912	-2.18183e-11	-21.8183			7.89048	2.5776e-11	25.776			-7.89208	-1.79035e-11	-17.9035			7.89136	2.02483e-11	20.2483			-7.89064	-1.92267e-11	-19.2267
				2.10888	5.08842e-12								7.88848	1.83195e-11	18.3195			7.8896	5.15026e-11	51.5026			-7.88888	-2.06822e-11	-20.6822			7.88816	2.53778e-11	25.3778			-7.88976	-1.76293e-11	-17.6293			7.88904	1.99908e-11	19.9908			-7.88832	-1.84208e-11	-18.4208
				2.1112	4.86669e-12								7.88616	1.88511e-11	18.8511			7.88728	5.0413e-11	50.413			-7.88656	-2.22379e-11	-22.2379			7.88584	2.67213e-11	26.7213			-7.88744	-1.62858e-11	-16.2858			7.88672	2.15548e-11	21.5548			-7.886	-1.83982e-11	-18.3982
				2.11352	3.86534e-12								7.88384	1.80906e-11	18.0906			7.88496	5.2523e-11	52.523			-7.88424	-2.19924e-11	-21.9924			7.88352	2.56473e-11	25.6473			-7.88512	-1.7342e-11	-17.342			7.8844	2.18087e-11	21.8087			-7.88368	-1.92958e-11	-19.2958
				2.11584	4.39582e-12								7.88152	1.76447e-11	17.6447			7.88264	5.31631e-11	53.1631			-7.88192	-2.17849e-11	-21.7849			7.8812	2.77084e-11	27.7084			-7.8828	-1.57351e-11	-15.7351			7.88208	2.09373e-11	20.9373			-7.88136	-1.99634e-11	-19.9634
				2.11816	7.06253e-12								7.8792	1.81621e-11	18.1621			7.88032	5.12951e-11	51.2951			-7.8796	-2.12449e-11	-21.2449			7.87888	2.8941e-11	28.941			-7.88048	-1.66494e-11	-16.6494			7.87976	2.13045e-11	21.3045			-7.87904	-2.11066e-11	-21.1066
				2.12048	5.07293e-12								7.87688	1.90717e-11	19.0717			7.878	4.9805e-11	49.805			-7.87728	-2.13379e-11	-21.3379			7.87656	2.78192e-11	27.8192			-7.87816	-1.61511e-11	-16.1511			7.87744	2.04712e-11	20.4712			-7.87672	-1.91754e-11	-19.1754
				2.1228	4.31475e-12								7.87456	1.84315e-11	18.4315			7.87568	4.99421e-11	49.9421			-7.87496	-2.26242e-11	-22.6242			7.87424	2.70694e-11	27.0694			-7.87584	-1.71179e-11	-17.1179			7.87512	2.09456e-11	20.9456			-7.8744	-1.94019e-11	-19.4019
				2.12512	4.82497e-12								7.87224	1.6877e-11	16.877			7.87336	5.0376e-11	50.376			-7.87264	-2.09016e-11	-20.9016			7.87192	2.79432e-11	27.9432			-7.87352	-1.65361e-11	-16.5361			7.8728	2.05534e-11	20.5534			-7.87208	-1.89263e-11	-18.9263
				2.12744	2.54092e-12								7.86992	1.96141e-11	19.6141			7.87104	4.97967e-11	49.7967			-7.87032	-1.95509e-11	-19.5509			7.8696	2.65342e-11	26.5342			-7.8712	-1.74898e-11	-17.4898			7.87048	2.12866e-11	21.2866			-7.86976	-1.81622e-11	-18.1622
				2.12976	1.21531e-12								7.8676	1.85901e-11	18.5901			7.86872	4.89193e-11	48.9193			-7.868	-2.10208e-11	-21.0208			7.86728	2.73412e-11	27.3412			-7.86888	-1.73182e-11	-17.3182			7.86816	1.91396e-11	19.1396			-7.86744	-1.96392e-11	-19.6392
				2.13208	1.32975e-12								7.86528	1.68377e-11	16.8377			7.8664	4.93115e-11	49.3115			-7.86568	-2.02102e-11	-20.2102			7.86496	2.84177e-11	28.4177			-7.86656	-1.89883e-11	-18.9883			7.86584	1.96105e-11	19.6105			-7.86512	-2.04271e-11	-20.4271
				2.1344	4.51145e-12								7.86296	1.82587e-11	18.2587			7.86408	5.00172e-11	50.0172			-7.86336	-2.05916e-11	-20.5916			7.86264	2.73949e-11	27.3949			-7.86424	-1.89549e-11	-18.9549			7.86352	1.96737e-11	19.6737			-7.8628	-1.96535e-11	-19.6535
				2.13672	3.82242e-12								7.86064	1.82098e-11	18.2098			7.86176	5.20771e-11	52.0771			-7.86104	-2.11567e-11	-21.1567			7.86032	2.71731e-11	27.1731			-7.86192	-1.58388e-11	-15.8388			7.8612	2.06107e-11	20.6107			-7.86048	-1.72192e-11	-17.2192
				2.13904	5.11703e-12								7.85832	1.68794e-11	16.8794			7.85944	5.12486e-11	51.2486			-7.85872	-2.00504e-11	-20.0504			7.858	2.63589e-11	26.3589			-7.8596	-1.52892e-11	-15.2892			7.85888	2.09778e-11	20.9778			-7.85816	-1.96451e-11	-19.6451
				2.14136	5.43055e-12								7.856	1.69688e-11	16.9688			7.85712	5.10162e-11	51.0162			-7.8564	-2.17146e-11	-21.7146			7.85568	2.75594e-11	27.5594			-7.85728	-1.6411e-11	-16.411			7.85656	1.96212e-11	19.6212			-7.85584	-2.0352e-11	-20.352
				2.14368	6.48913e-12								7.85368	1.64669e-11	16.4669			7.8548	5.10257e-11	51.0257			-7.85408	-2.05618e-11	-20.5618			7.85336	2.70015e-11	27.0015			-7.85496	-1.69844e-11	-16.9844			7.85424	1.89799e-11	18.9799			-7.85352	-2.05308e-11	-20.5308
				2.146	5.67851e-12								7.85136	1.65432e-11	16.5432			7.85248	4.79251e-11	47.9251			-7.85176	-2.0904e-11	-20.904			7.85104	2.43407e-11	24.3407			-7.85264	-1.60498e-11	-16.0498			7.85192	2.13521e-11	21.3521			-7.8512	-1.91802e-11	-19.1802
				2.14832	6.84318e-12								7.84904	1.94937e-11	19.4937			7.85016	4.97168e-11	49.7168			-7.84944	-1.91635e-11	-19.1635			7.84872	2.42537e-11	24.2537			-7.85032	-1.72061e-11	-17.2061			7.8496	1.95712e-11	19.5712			-7.84888	-1.96809e-11	-19.6809
				2.15064	4.92034e-12								7.84672	1.68818e-11	16.8818			7.84784	5.10388e-11	51.0388			-7.84712	-2.05988e-11	-20.5988			7.8464	2.63482e-11	26.3482			-7.848	-1.49697e-11	-14.9697			7.84728	1.96713e-11	19.6713			-7.84656	-2.01541e-11	-20.1541
				2.15296	5.75361e-12								7.8444	1.84458e-11	18.4458			7.84552	5.06109e-11	50.6109			-7.8448	-2.0681e-11	-20.681			7.84408	2.70229e-11	27.0229			-7.84568	-1.58853e-11	-15.8853			7.84496	2.03675e-11	20.3675			-7.84424	-1.99944e-11	-19.9944
				2.15528	5.4389e-12								7.84208	1.81323e-11	18.1323			7.8432	5.05238e-11	50.5238			-7.84248	-2.16657e-11	-21.6657			7.84176	2.64305e-11	26.4305			-7.84336	-1.55765e-11	-15.5765			7.84264	2.0687e-11	20.687			-7.84192	-1.91039e-11	-19.1039
				2.1576	7.59182e-12								7.83976	1.84804e-11	18.4804			7.84088	5.14048e-11	51.4048			-7.84016	-2.01351e-11	-20.1351			7.83944	2.69848e-11	26.9848			-7.84104	-1.73277e-11	-17.3277			7.84032	1.96618e-11	19.6618			-7.8396	-1.88202e-11	-18.8202
				2.15992	7.14001e-12								7.83744	2.01636e-11	20.1636			7.83856	5.16075e-11	51.6075			-7.83784	-1.93709e-11	-19.3709			7.83712	2.84308e-11	28.4308			-7.83872	-1.63967e-11	-16.3967			7.838	2.08252e-11	20.8252			-7.83728	-2.00862e-11	-20.0862
				2.16224	4.70576e-12								7.83512	1.71357e-11	17.1357			7.83624	5.13106e-11	51.3106			-7.83552	-2.13009e-11	-21.3009			7.8348	2.73245e-11	27.3245			-7.8364	-1.61129e-11	-16.1129			7.83568	2.16645e-11	21.6645			-7.83496	-1.77366e-11	-17.7366
				2.16456	3.13577e-12								7.8328	1.67113e-11	16.7113			7.83392	5.13249e-11	51.3249			-7.8332	-2.14595e-11	-21.4595			7.83248	2.66129e-11	26.6129			-7.83408	-1.62989e-11	-16.2989			7.83336	2.18779e-11	21.8779			-7.83264	-1.96797e-11	-19.6797
				2.16688	4.21104e-12								7.83048	1.70976e-11	17.0976			7.8316	4.92316e-11	49.2316			-7.83088	-2.12997e-11	-21.2997			7.83016	2.55316e-11	25.5316			-7.83176	-1.77104e-11	-17.7104			7.83104	2.07323e-11	20.7323			-7.83032	-2.02543e-11	-20.2543
				2.1692	5.31015e-12								7.82816	1.63382e-11	16.3382			7.82928	5.07718e-11	50.7718			-7.82856	-2.2021e-11	-22.021			7.82784	2.61515e-11	26.1515			-7.82944	-1.89168e-11	-18.9168			7.82872	2.28649e-11	22.8649			-7.828	-1.86831e-11	-18.6831
				2.17152	3.86295e-12								7.82584	1.60116e-11	16.0116			7.82696	4.96095e-11	49.6095			-7.82624	-1.93304e-11	-19.3304			7.82552	2.64138e-11	26.4138			-7.82712	-1.63871e-11	-16.3871			7.8264	2.18898e-11	21.8898			-7.82568	-1.90944e-11	-19.0944
				2.17384	3.98216e-12								7.82352	1.64681e-11	16.4681			7.82464	4.92686e-11	49.2686			-7.82392	-2.12533e-11	-21.2533			7.8232	2.72554e-11	27.2554			-7.8248	-1.71501e-11	-17.1501			7.82408	2.15298e-11	21.5298			-7.82336	-2.02757e-11	-20.2757
				2.17616	4.18958e-12								7.8212	1.84053e-11	18.4053			7.82232	4.84878e-11	48.4878			-7.8216	-2.02054e-11	-20.2054			7.82088	2.65139e-11	26.5139			-7.82248	-1.70094e-11	-17.0094			7.82176	2.06917e-11	20.6917			-7.82104	-1.93209e-11	-19.3209
				2.17848	4.68192e-12								7.81888	1.6759e-11	16.759			7.82	5.01126e-11	50.1126			-7.81928	-1.94055e-11	-19.4055			7.81856	2.53671e-11	25.3671			-7.82016	-1.85138e-11	-18.5138			7.81944	2.04819e-11	20.4819			-7.81872	-1.95843e-11	-19.5843
				2.1808	4.4137e-12								7.81656	1.7119e-11	17.119			7.81768	5.05787e-11	50.5787			-7.81696	-2.25801e-11	-22.5801			7.81624	2.6316e-11	26.316			-7.81784	-1.74278e-11	-17.4278			7.81712	2.10815e-11	21.0815			-7.8164	-1.89597e-11	-18.9597
				2.18312	6.00514e-12								7.81424	1.74123e-11	17.4123			7.81536	5.0382e-11	50.382			-7.81464	-2.03187e-11	-20.3187			7.81392	2.55662e-11	25.5662			-7.81552	-1.71823e-11	-17.1823			7.8148	1.84542e-11	18.4542			-7.81408	-1.9539e-11	-19.539
				2.18544	5.92408e-12								7.81192	1.71154e-11	17.1154			7.81304	5.06931e-11	50.6931			-7.81232	-2.0687e-11	-20.687			7.8116	2.57152e-11	25.7152			-7.8132	-1.75637e-11	-17.5637			7.81248	1.97094e-11	19.7094			-7.81176	-2.03067e-11	-20.3067
				2.18776	4.18482e-12								7.8096	1.78188e-11	17.8188			7.81072	4.91482e-11	49.1482			-7.81	-2.10732e-11	-21.0732			7.80928	2.59202e-11	25.9202			-7.81088	-1.67924e-11	-16.7924			7.81016	1.96796e-11	19.6796			-7.80944	-1.92827e-11	-19.2827
				2.19008	4.37197e-12								7.80728	1.70189e-11	17.0189			7.8084	5.01281e-11	50.1281			-7.80768	-1.99348e-11	-19.9348			7.80696	2.75129e-11	27.5129			-7.80856	-1.62393e-11	-16.2393			7.80784	1.95151e-11	19.5151			-7.80712	-1.90038e-11	-19.0038
				2.1924	7.28187e-12								7.80496	1.73074e-11	17.3074			7.80608	4.99552e-11	49.9552			-7.80536	-1.8974e-11	-18.974			7.80464	2.81459e-11	28.1459			-7.80624	-1.58566e-11	-15.8566			7.80552	2.15429e-11	21.5429			-7.8048	-2.01768e-11	-20.1768
				2.19472	6.49628e-12								7.80264	1.85019e-11	18.5019			7.80376	4.91446e-11	49.1446			-7.80304	-1.95939e-11	-19.5939			7.80232	2.6502e-11	26.502			-7.80392	-1.45525e-11	-14.5525			7.8032	1.96284e-11	19.6284			-7.80248	-2.13141e-11	-21.3141
				2.19704	3.65076e-12								7.80032	1.73717e-11	17.3717			7.80144	4.94665e-11	49.4665			-7.80072	-2.15441e-11	-21.5441			7.8	2.52157e-11	25.2157			-7.8016	-1.50162e-11	-15.0162			7.80088	1.92266e-11	19.2266			-7.80016	-2.08098e-11	-20.8098
				2.19936	2.35257e-12								7.798	1.68472e-11	16.8472			7.79912	5.04189e-11	50.4189			-7.7984	-1.99992e-11	-19.9992			7.79768	2.59524e-11	25.9524			-7.79928	-1.71358e-11	-17.1358			7.79856	2.01314e-11	20.1314			-7.79784	-2.17659e-11	-21.7659
				2.20168	3.95474e-12								7.79568	1.65134e-11	16.5134			7.7968	4.77987e-11	47.7987			-7.79608	-2.13284e-11	-21.3284			7.79536	2.60943e-11	26.0943			-7.79696	-1.79845e-11	-17.9845			7.79624	1.91468e-11	19.1468			-7.79552	-2.01494e-11	-20.1494
				2.204	6.46291e-12								7.79336	1.69772e-11	16.9772			7.79448	5.08684e-11	50.8684			-7.79376	-1.95462e-11	-19.5462			7.79304	2.56961e-11	25.6961			-7.79464	-1.59771e-11	-15.9771			7.79392	1.97059e-11	19.7059			-7.7932	-2.05988e-11	-20.5988
				2.20632	5.48777e-12								7.79104	1.84148e-11	18.4148			7.79216	5.05346e-11	50.5346			-7.79144	-2.06024e-11	-20.6024			7.79072	2.6142e-11	26.142			-7.79232	-1.56337e-11	-15.6337			7.7916	2.06858e-11	20.6858			-7.79088	-1.91695e-11	-19.1695
				2.20864	6.2984e-12								7.78872	1.92517e-11	19.2517			7.78984	5.03367e-11	50.3367			-7.78912	-2.13975e-11	-21.3975			7.7884	2.66939e-11	26.6939			-7.79	-1.62322e-11	-16.2322			7.78928	1.9986e-11	19.986			-7.78856	-1.80096e-11	-18.0096
				2.21096	5.94315e-12								7.7864	1.6672e-11	16.672			7.78752	4.95046e-11	49.5046			-7.7868	-1.97143e-11	-19.7143			7.78608	2.73138e-11	27.3138			-7.78768	-1.58817e-11	-15.8817			7.78696	2.0346e-11	20.346			-7.78624	-1.77211e-11	-17.7211
				2.21328	6.26025e-12								7.78408	1.72299e-11	17.2299			7.7852	4.95046e-11	49.5046			-7.78448	-2.04963e-11	-20.4963			7.78376	2.58714e-11	25.8714			-7.78536	-1.4332e-11	-14.332			7.78464	1.99383e-11	19.9383			-7.78392	-1.74958e-11	-17.4958
				2.2156	5.59268e-12								7.78176	1.72037e-11	17.2037			7.78288	5.02401e-11	50.2401			-7.78216	-2.19661e-11	-21.9661			7.78144	2.63303e-11	26.3303			-7.78304	-1.44559e-11	-14.4559			7.78232	1.94531e-11	19.4531			-7.7816	-1.77545e-11	-17.7545
				2.21792	5.01451e-12								7.77944	1.83481e-11	18.3481			7.78056	4.9867e-11	49.867			-7.77984	-2.00802e-11	-20.0802			7.77912	2.59572e-11	25.9572			-7.78072	-1.54919e-11	-15.4919			7.78	1.99073e-11	19.9073			-7.77928	-1.93173e-11	-19.3173
				2.22024	5.15399e-12								7.77712	1.88499e-11	18.8499			7.77824	4.88716e-11	48.8716			-7.77752	-2.01601e-11	-20.1601			7.7768	2.61444e-11	26.1444			-7.7784	-1.50985e-11	-15.0985			7.77768	2.20591e-11	22.0591			-7.77696	-2.11007e-11	-21.1007
				2.22256	6.03971e-12								7.7748	1.69843e-11	16.9843			7.77592	4.93735e-11	49.3735			-7.7752	-2.0085e-11	-20.085			7.77448	2.53349e-11	25.3349			-7.77608	-1.58996e-11	-15.8996			7.77536	2.08693e-11	20.8693			-7.77464	-2.02352e-11	-20.2352
				2.22488	5.26247e-12								7.77248	1.55192e-11	15.5192			7.7736	5.05727e-11	50.5727			-7.77288	-1.7981e-11	-17.981			7.77216	2.85929e-11	28.5929			-7.77376	-1.42437e-11	-14.2437			7.77304	2.08121e-11	20.8121			-7.77232	-1.91051e-11	-19.1051
				2.2272	5.3328e-12								7.77016	1.54036e-11	15.4036			7.77128	4.90397e-11	49.0397			-7.77056	-1.86771e-11	-18.6771			7.76984	2.81042e-11	28.1042			-7.77144	-1.62918e-11	-16.2918			7.77072	2.09373e-11	20.9373			-7.77	-2.02686e-11	-20.2686
				2.22952	3.95474e-12								7.76784	1.66863e-11	16.6863			7.76896	4.88287e-11	48.8287			-7.76824	-2.03365e-11	-20.3365			7.76752	2.72661e-11	27.2661			-7.76912	-1.73825e-11	-17.3825			7.7684	2.01076e-11	20.1076			-7.76768	-1.86962e-11	-18.6962
				2.23184	5.15995e-12								7.76552	1.70606e-11	17.0606			7.76664	4.86344e-11	48.6344			-7.76592	-2.0544e-11	-20.544			7.7652	2.56973e-11	25.6973			-7.7668	-1.70118e-11	-17.0118			7.76608	2.29853e-11	22.9853			-7.76536	-1.79237e-11	-17.9237
				2.23416	5.07293e-12								7.7632	1.67399e-11	16.7399			7.76432	4.82768e-11	48.2768			-7.7636	-2.14702e-11	-21.4702			7.76288	2.84558e-11	28.4558			-7.76448	-1.61475e-11	-16.1475			7.76376	2.2344e-11	22.344			-7.76304	-1.95843e-11	-19.5843
				2.23648	3.0714e-12								7.76088	1.62047e-11	16.2047			7.762	4.82303e-11	48.2303			-7.76128	-2.1146e-11	-21.146			7.76056	2.75451e-11	27.5451			-7.76216	-1.56373e-11	-15.6373			7.76144	2.1891e-11	21.891			-7.76072	-1.88977e-11	-18.8977
				2.2388	4.1264e-12								7.75856	1.82146e-11	18.2146			7.75968	4.91076e-11	49.1076			-7.75896	-1.9849e-11	-19.849			7.75824	2.76118e-11	27.6118			-7.75984	-1.61821e-11	-16.1821			7.75912	2.00325e-11	20.0325			-7.7584	-2.02614e-11	-20.2614
				2.24112	4.57582e-12								7.75624	1.71476e-11	17.1476			7.75736	5.07289e-11	50.7289			-7.75664	-1.76686e-11	-17.6686			7.75592	2.5981e-11	25.981			-7.75752	-1.57208e-11	-15.7208			7.7568	2.06727e-11	20.6727			-7.75608	-1.91146e-11	-19.1146
				2.24344	6.57139e-12								7.75392	1.58244e-11	15.8244			7.75504	4.90051e-11	49.0051			-7.75432	-1.84578e-11	-18.4578			7.7536	2.54017e-11	25.4017			-7.7552	-1.47301e-11	-14.7301			7.75448	1.87856e-11	18.7856			-7.75376	-1.87272e-11	-18.7272
				2.24576	3.28836e-12								7.7516	1.68866e-11	16.8866			7.75272	4.88049e-11	48.8049			-7.752	-2.09767e-11	-20.9767			7.75128	2.74592e-11	27.4592			-7.75288	-1.82516e-11	-18.2516			7.75216	2.08217e-11	20.8217			-7.75144	-1.80108e-11	-18.0108
				2.24808	4.67477e-12								7.74928	1.76626e-11	17.6626			7.7504	5.02771e-11	50.2771			-7.74968	-2.24239e-11	-22.4239			7.74896	2.53051e-11	25.3051			-7.75056	-1.56659e-11	-15.6659			7.74984	2.22069e-11	22.2069			-7.74912	-2.01863e-11	-20.1863
				2.2504	3.67818e-12								7.74696	1.57231e-11	15.7231			7.74808	4.9966e-11	49.966			-7.74736	-1.88226e-11	-18.8226			7.74664	2.61038e-11	26.1038			-7.74824	-1.47897e-11	-14.7897			7.74752	2.20161e-11	22.0161			-7.7468	-1.96988e-11	-19.6988
				2.25272	4.32548e-12								7.74464	1.56992e-11	15.6992			7.74576	5.04261e-11	50.4261			-7.74504	-1.98812e-11	-19.8812			7.74432	2.64567e-11	26.4567			-7.74592	-1.62107e-11	-16.2107			7.7452	2.06071e-11	20.6071			-7.74448	-2.06691e-11	-20.6691
				2.25504	3.51009e-12								7.74232	1.74039e-11	17.4039			7.74344	4.91529e-11	49.1529			-7.74272	-1.94806e-11	-19.4806			7.742	2.82412e-11	28.2412			-7.7436	-1.64896e-11	-16.4896			7.74288	2.15119e-11	21.5119			-7.74216	-1.87201e-11	-18.7201
				2.25736	3.60784e-12								7.74	1.38324e-11	13.8324			7.74112	4.83769e-11	48.3769			-7.7404	-1.92148e-11	-19.2148			7.73968	2.9301e-11	29.301			-7.74128	-1.70106e-11	-17.0106			7.74056	1.81478e-11	18.1478			-7.73984	-1.84936e-11	-18.4936
				2.25968	5.41148e-12								7.73768	1.7057e-11	17.057			7.7388	5.03176e-11	50.3176			-7.73808	-2.01112e-11	-20.1112			7.73736	2.76035e-11	27.6035			-7.73896	-1.72729e-11	-17.2729			7.73824	1.77818e-11	17.7818			-7.73752	-1.87809e-11	-18.7809
				2.262	6.12197e-12								7.73536	1.66708e-11	16.6708			7.73648	4.96405e-11	49.6405			-7.73576	-1.86068e-11	-18.6068			7.73504	2.55233e-11	25.5233			-7.73664	-1.66029e-11	-16.6029			7.73592	1.95032e-11	19.5032			-7.7352	-1.78153e-11	-17.8153
				2.26432	4.71053e-12								7.73304	1.66839e-11	16.6839			7.73416	4.88621e-11	48.8621			-7.73344	-1.9334e-11	-19.334			7.73272	2.56282e-11	25.6282			-7.73432	-1.63287e-11	-16.3287			7.7336	1.90884e-11	19.0884			-7.73288	-1.867e-11	-18.67
				2.26664	5.41386e-12								7.73072	1.69807e-11	16.9807			7.73184	5.17004e-11	51.7004			-7.73112	-1.8695e-11	-18.695			7.7304	2.70754e-11	27.0754			-7.732	-1.70046e-11	-17.0046			7.73128	1.9446e-11	19.446			-7.73056	-1.85865e-11	-18.5865
				2.26896	4.59966e-12								7.7284	1.70892e-11	17.0892			7.72952	5.08219e-11	50.8219			-7.7288	-1.81419e-11	-18.1419			7.72808	2.6713e-11	26.713			-7.72968	-1.80644e-11	-18.0644			7.72896	2.13116e-11	21.3116			-7.72824	-1.92839e-11	-19.2839
				2.27128	4.52218e-12								7.72608	1.83576e-11	18.3576			7.7272	4.90302e-11	49.0302			-7.72648	-2.10041e-11	-21.0041			7.72576	2.75355e-11	27.5355			-7.72736	-1.42306e-11	-14.2306			7.72664	2.06142e-11	20.6142			-7.72592	-2.02233e-11	-20.2233
				2.2736	4.32787e-12								7.72376	1.60271e-11	16.0271			7.72488	5.02318e-11	50.2318			-7.72416	-1.88929e-11	-18.8929			7.72344	2.52717e-11	25.2717			-7.72504	-1.50794e-11	-15.0794			7.72432	2.17551e-11	21.7551			-7.7236	-2.08873e-11	-20.8873
				2.27592	4.38747e-12								7.72144	1.67376e-11	16.7376			7.72256	4.83983e-11	48.3983			-7.72184	-1.91278e-11	-19.1278			7.72112	2.67893e-11	26.7893			-7.72272	-1.5685e-11	-15.685			7.722	1.9781e-11	19.781			-7.72128	-1.97488e-11	-19.7488
				2.27824	5.00259e-12								7.71912	1.84768e-11	18.4768			7.72024	4.72396e-11	47.2396			-7.71952	-2.03783e-11	-20.3783			7.7188	2.73925e-11	27.3925			-7.7204	-1.47814e-11	-14.7814			7.71968	1.87903e-11	18.7903			-7.71896	-1.68222e-11	-16.8222
				2.28056	2.99749e-12								7.7168	1.56361e-11	15.6361			7.71792	4.7521e-11	47.521			-7.7172	-1.94961e-11	-19.4961			7.71648	2.64019e-11	26.4019			-7.71808	-1.64598e-11	-16.4598			7.71736	1.92851e-11	19.2851			-7.71664	-1.87141e-11	-18.7141
				2.28288	4.88219e-12								7.71448	1.65993e-11	16.5993			7.7156	4.6485e-11	46.485			-7.71488	-1.87963e-11	-18.7963			7.71416	2.41452e-11	24.1452			-7.71576	-1.75959e-11	-17.5959			7.71504	2.12139e-11	21.2139			-7.71432	-2.08217e-11	-20.8217
				2.2852	4.96564e-12								7.71216	1.52081e-11	15.2081			7.71328	4.82994e-11	48.2994			-7.71256	-1.95498e-11	-19.5498			7.71184	2.28721e-11	22.8721			-7.71344	-1.70332e-11	-17.0332			7.71272	2.03854e-11	20.3854			-7.712	-1.8968e-11	-18.968
				2.28752	5.72023e-12								7.70984	1.58745e-11	15.8745			7.71096	4.84067e-11	48.4067			-7.71024	-2.00016e-11	-20.0016			7.70952	2.5509e-11	25.509			-7.71112	-1.82301e-11	-18.2301			7.7104	2.11674e-11	21.1674			-7.70968	-1.66887e-11	-16.6887
				2.28984	6.93259e-12								7.70752	1.81263e-11	18.1263			7.70864	4.6913e-11	46.913			-7.70792	-1.91993e-11	-19.1993			7.7072	2.43264e-11	24.3264			-7.7088	-1.74099e-11	-17.4099			7.70808	2.0501e-11	20.501			-7.70736	-2.06298e-11	-20.6298
				2.29216	7.47618e-12								7.7052	1.55657e-11	15.5657			7.70632	4.7844e-11	47.844			-7.7056	-1.92374e-11	-19.2374			7.70488	2.49248e-11	24.9248			-7.70648	-1.6945e-11	-16.945			7.70576	1.94031e-11	19.4031			-7.70504	-2.05654e-11	-20.5654
				2.29448	6.78239e-12								7.70288	1.39755e-11	13.9755			7.704	4.77105e-11	47.7105			-7.70328	-2.06942e-11	-20.6942			7.70256	2.4907e-11	24.907			-7.70416	-1.71143e-11	-17.1143			7.70344	1.92374e-11	19.2374			-7.70272	-1.91802e-11	-19.1802
				2.2968	5.51877e-12								7.70056	1.74361e-11	17.4361			7.70168	4.82815e-11	48.2815			-7.70096	-2.05547e-11	-20.5547			7.70024	2.41953e-11	24.1953			-7.70184	-1.77425e-11	-17.7425			7.70112	2.13235e-11	21.3235			-7.7004	-2.13892e-11	-21.3892
				2.29912	4.77252e-12								7.69824	1.70141e-11	17.0141			7.69936	4.86773e-11	48.6773			-7.69864	-1.98633e-11	-19.8633			7.69792	2.65699e-11	26.5699			-7.69952	-1.87594e-11	-18.7594			7.6988	2.09313e-11	20.9313			-7.69808	-2.15549e-11	-21.5549
				2.30144	4.76537e-12								7.69592	1.69676e-11	16.9676			7.69704	4.93031e-11	49.3031			-7.69632	-2.07538e-11	-20.7538			7.6956	2.53814e-11	25.3814			-7.6972	-1.84113e-11	-18.4113			7.69648	2.02733e-11	20.2733			-7.69576	-2.11233e-11	-21.1233
				2.30376	5.3936e-12								7.6936	1.76018e-11	17.6018			7.69472	4.888e-11	48.88			-7.694	-1.80239e-11	-18.0239			7.69328	2.52384e-11	25.2384			-7.69488	-1.91933e-11	-19.1933			7.69416	2.14845e-11	21.4845			-7.69344	-2.12807e-11	-21.2807
				2.30608	6.67033e-12								7.69128	1.71953e-11	17.1953			7.6924	5.04249e-11	50.4249			-7.69168	-1.95605e-11	-19.5605			7.69096	2.33406e-11	23.3406			-7.69256	-1.77747e-11	-17.7747			7.69184	2.16001e-11	21.6001			-7.69112	-2.02269e-11	-20.2269
				2.3084	7.52387e-12								7.68896	1.76328e-11	17.6328			7.69008	4.95642e-11	49.5642			-7.68936	-2.03485e-11	-20.3485			7.68864	2.4026e-11	24.026			-7.69024	-1.64169e-11	-16.4169			7.68952	2.00206e-11	20.0206			-7.6888	-1.9849e-11	-19.849
				2.31072	6.04567e-12								7.68664	1.68627e-11	16.8627			7.68776	4.8185e-11	48.185			-7.68704	-2.06036e-11	-20.6036			7.68632	2.6266e-11	26.266			-7.68792	-1.65552e-11	-16.5552			7.6872	1.85996e-11	18.5996			-7.68648	-2.00933e-11	-20.0933
				2.31304	5.725e-12								7.68432	1.62071e-11	16.2071			7.68544	4.79012e-11	47.9012			-7.68472	-1.70189e-11	-17.0189			7.684	2.5112e-11	25.112			-7.6856	-1.65826e-11	-16.5826			7.68488	2.14964e-11	21.4964			-7.68416	-2.02364e-11	-20.2364
				2.31536	4.04773e-12								7.682	1.607e-11	16.07			7.68312	4.81909e-11	48.1909			-7.6824	-1.80692e-11	-18.0692			7.68168	2.56723e-11	25.6723			-7.68328	-1.82468e-11	-18.2468			7.68256	2.03818e-11	20.3818			-7.68184	-1.93447e-11	-19.3447
				2.31768	3.57804e-12								7.67968	1.58816e-11	15.8816			7.6808	4.78667e-11	47.8667			-7.68008	-1.68544e-11	-16.8544			7.67936	2.35933e-11	23.5933			-7.68096	-1.73241e-11	-17.3241			7.68024	2.11578e-11	21.1578			-7.67952	-2.05797e-11	-20.5797
				2.32	5.36737e-12								7.67736	1.7274e-11	17.274			7.67848	4.63849e-11	46.3849			-7.67776	-1.82206e-11	-18.2206			7.67704	2.45791e-11	24.5791			-7.67864	-1.60235e-11	-16.0235			7.67792	2.05928e-11	20.5928			-7.6772	-1.79762e-11	-17.9762
				2.32232	5.48301e-12								7.67504	1.66338e-11	16.6338			7.67616	4.65554e-11	46.5554			-7.67544	-1.85496e-11	-18.5496			7.67472	2.59977e-11	25.9977			-7.67632	-1.47599e-11	-14.7599			7.6756	2.08395e-11	20.8395			-7.67488	-1.72574e-11	-17.2574
				2.32464	6.6906e-12								7.67272	1.6492e-11	16.492			7.67384	4.82994e-11	48.2994			-7.67312	-1.95414e-11	-19.5414			7.6724	2.35337e-11	23.5337			-7.674	-1.45728e-11	-14.5728			7.67328	2.03055e-11	20.3055			-7.67256	-1.78474e-11	-17.8474
				2.32696	6.6143e-12								7.6704	1.54096e-11	15.4096			7.67152	4.74816e-11	47.4816			-7.6708	-1.96046e-11	-19.6046			7.67008	2.4907e-11	24.907			-7.67168	-1.60498e-11	-16.0498			7.67096	2.11602e-11	21.1602			-7.67024	-1.70595e-11	-17.0595
				2.32928	7.16386e-12								7.66808	1.66636e-11	16.6636			7.6692	4.86844e-11	48.6844			-7.66848	-1.91373e-11	-19.1373			7.66776	2.37137e-11	23.7137			-7.66936	-1.65314e-11	-16.5314			7.66864	1.97929e-11	19.7929			-7.66792	-1.78808e-11	-17.8808
				2.3316	6.42833e-12								7.66576	1.55574e-11	15.5574			7.66688	4.75925e-11	47.5925			-7.66616	-1.75852e-11	-17.5852			7.66544	2.49153e-11	24.9153			-7.66704	-1.51664e-11	-15.1664			7.66632	1.93184e-11	19.3184			-7.6656	-1.78486e-11	-17.8486
				2.33392	3.76878e-12								7.66344	1.55836e-11	15.5836			7.66456	4.93508e-11	49.3508			-7.66384	-1.94198e-11	-19.4198			7.66312	2.48831e-11	24.8831			-7.66472	-1.62119e-11	-16.2119			7.664	1.74314e-11	17.4314			-7.66328	-1.99265e-11	-19.9265
				2.33624	4.51264e-12								7.66112	1.66648e-11	16.6648			7.66224	4.78273e-11	47.8273			-7.66152	-1.79059e-11	-17.9059			7.6608	2.45291e-11	24.5291			-7.6624	-1.77115e-11	-17.7115			7.66168	1.64324e-11	16.4324			-7.66096	-1.87248e-11	-18.7248
				2.33856	7.31883e-12								7.6588	1.63203e-11	16.3203			7.65992	4.71455e-11	47.1455			-7.6592	-1.86271e-11	-18.6271			7.65848	2.29412e-11	22.9412			-7.66008	-1.7584e-11	-17.584			7.65936	1.74826e-11	17.4826			-7.65864	-1.88178e-11	-18.8178
				2.34088	6.66079e-12								7.65648	1.57279e-11	15.7279			7.6576	4.58079e-11	45.8079			-7.65688	-1.81598e-11	-18.1598			7.65616	2.29984e-11	22.9984			-7.65776	-1.67603e-11	-16.7603			7.65704	1.9924e-11	19.924			-7.65632	-1.8701e-11	-18.701
				2.3432	5.94554e-12								7.65416	1.6163e-11	16.163			7.65528	4.7422e-11	47.422			-7.65456	-1.90455e-11	-19.0455			7.65384	2.3939e-11	23.939			-7.65544	-1.65767e-11	-16.5767			7.65472	2.10601e-11	21.0601			-7.654	-1.65993e-11	-16.5993
				2.34552	7.21154e-12								7.65184	1.7665e-11	17.665			7.65296	4.66877e-11	46.6877			-7.65224	-1.82134e-11	-18.2134			7.65152	2.60502e-11	26.0502			-7.65312	-1.60688e-11	-16.0688			7.6524	1.96093e-11	19.6093			-7.65168	-1.849e-11	-18.49
				2.34784	8.91862e-12								7.64952	1.88106e-11	18.8106			7.65064	4.69571e-11	46.9571			-7.64992	-1.80382e-11	-18.0382			7.6492	2.57128e-11	25.7128			-7.6508	-1.70189e-11	-17.0189			7.65008	1.90049e-11	19.0049			-7.64936	-2.03234e-11	-20.3234
				2.35016	7.06849e-12								7.6472	1.83063e-11	18.3063			7.64832	4.79954e-11	47.9954			-7.6476	-1.75256e-11	-17.5256			7.64688	2.3188e-11	23.188			-7.64848	-1.53727e-11	-15.3727			7.64776	1.89787e-11	18.9787			-7.64704	-1.86533e-11	-18.6533
				2.35248	5.50804e-12								7.64488	1.68651e-11	16.8651			7.646	4.66591e-11	46.6591			-7.64528	-1.80024e-11	-18.0024			7.64456	2.55125e-11	25.5125			-7.64616	-1.63931e-11	-16.3931			7.64544	1.97619e-11	19.7619			-7.64472	-1.88083e-11	-18.8083
				2.3548	7.06134e-12								7.64256	1.51628e-11	15.1628			7.64368	4.94128e-11	49.4128			-7.64296	-1.92112e-11	-19.2112			7.64224	2.56091e-11	25.6091			-7.64384	-1.55288e-11	-15.5288			7.64312	1.90299e-11	19.0299			-7.6424	-1.83469e-11	-18.3469
				2.35712	7.98402e-12								7.64024	1.6362e-11	16.362			7.64136	4.62526e-11	46.2526			-7.64064	-1.85162e-11	-18.5162			7.63992	2.34037e-11	23.4037			-7.64152	-1.67614e-11	-16.7614			7.6408	1.87319e-11	18.7319			-7.64008	-1.80513e-11	-18.0513
				2.35944	5.8609e-12								7.63792	1.52009e-11	15.2009			7.63904	4.60738e-11	46.0738			-7.63832	-1.7826e-11	-17.826			7.6376	2.59441e-11	25.9441			-7.6392	-1.63085e-11	-16.3085			7.63848	1.82074e-11	18.2074			-7.63776	-1.8881e-11	-18.881
				2.36176	4.7451e-12								7.6356	1.58173e-11	15.8173			7.63672	4.76116e-11	47.6116			-7.636	-1.96797e-11	-19.6797			7.63528	2.50727e-11	25.0727			-7.63688	-1.48779e-11	-14.8779			7.63616	2.05356e-11	20.5356			-7.63544	-2.01828e-11	-20.1828
				2.36408	6.16607e-12								7.63328	1.53047e-11	15.3047			7.6344	4.70751e-11	47.0751			-7.63368	-1.84328e-11	-18.4328			7.63296	2.53695e-11	25.3695			-7.63456	-1.54847e-11	-15.4847			7.63384	1.82992e-11	18.2992			-7.63312	-1.93614e-11	-19.3614
				2.3664	7.51433e-12								7.63096	1.57457e-11	15.7457			7.63208	4.64564e-11	46.4564			-7.63136	-1.96058e-11	-19.6058			7.63064	2.29805e-11	22.9805			-7.63224	-1.57434e-11	-15.7434			7.63152	1.95271e-11	19.5271			-7.6308	-1.90991e-11	-19.0991
				2.36872	7.39155e-12								7.62864	1.74564e-11	17.4564			7.62976	4.72265e-11	47.2265			-7.62904	-1.79988e-11	-17.9988			7.62832	2.51239e-11	25.1239			-7.62992	-1.79047e-11	-17.9047			7.6292	1.96594e-11	19.6594			-7.62848	-1.87165e-11	-18.7165
				2.37104	7.27234e-12								7.62632	1.57779e-11	15.7779			7.62744	4.77594e-11	47.7594			-7.62672	-1.95271e-11	-19.5271			7.626	2.48939e-11	24.8939			-7.6276	-1.87284e-11	-18.7284			7.62688	1.93149e-11	19.3149			-7.62616	-1.99718e-11	-19.9718
				2.37336	5.43651e-12								7.624	1.70964e-11	17.0964			7.62512	4.60404e-11	46.0404			-7.6244	-1.88226e-11	-18.8226			7.62368	2.52074e-11	25.2074			-7.62528	-1.64932e-11	-16.4932			7.62456	1.85042e-11	18.5042			-7.62384	-2.00516e-11	-20.0516
				2.37568	8.10203e-12								7.62168	1.90907e-11	19.0907			7.6228	4.56339e-11	45.6339			-7.62208	-1.8794e-11	-18.794			7.62136	2.60383e-11	26.0383			-7.62296	-1.81908e-11	-18.1908			7.62224	2.05487e-11	20.5487			-7.62152	-2.05726e-11	-20.5726
				2.378	7.78255e-12								7.61936	1.72525e-11	17.2525			7.62048	4.46504e-11	44.6504			-7.61976	-1.70797e-11	-17.0797			7.61904	2.61396e-11	26.1396			-7.62064	-1.62655e-11	-16.2655			7.61992	1.96153e-11	19.6153			-7.6192	-1.84602e-11	-18.4602
				2.38032	6.991e-12								7.61704	1.6362e-11	16.362			7.61816	4.73243e-11	47.3243			-7.61744	-1.82504e-11	-18.2504			7.61672	2.747e-11	27.47			-7.61832	-1.72049e-11	-17.2049			7.6176	1.89322e-11	18.9322			-7.61688	-1.88464e-11	-18.8464
				2.38264	6.79312e-12								7.61472	1.40887e-11	14.0887			7.61584	4.78929e-11	47.8929			-7.61512	-2.11674e-11	-21.1674			7.6144	2.53981e-11	25.3981			-7.616	-1.84602e-11	-18.4602			7.61528	2.02518e-11	20.2518			-7.61456	-2.03902e-11	-20.3902
				2.38496	4.51264e-12								7.6124	1.38098e-11	13.8098			7.61352	4.98432e-11	49.8432			-7.6128	-1.867e-11	-18.67			7.61208	2.56639e-11	25.6639			-7.61368	-1.64098e-11	-16.4098			7.61296	1.95294e-11	19.5294			-7.61224	-2.16145e-11	-21.6145
				2.38728	4.64735e-12								7.61008	1.48171e-11	14.8171			7.6112	4.77379e-11	47.7379			-7.61048	-1.89168e-11	-18.9168			7.60976	2.541e-11	25.41			-7.61136	-1.74254e-11	-17.4254			7.61064	1.81681e-11	18.1681			-7.60992	-1.83898e-11	-18.3898
				2.3896	6.58927e-12								7.60776	1.64586e-11	16.4586			7.60888	4.7341e-11	47.341			-7.60816	-1.86175e-11	-18.6175			7.60744	2.43634e-11	24.3634			-7.60904	-1.75077e-11	-17.5077			7.60832	1.89501e-11	18.9501			-7.6076	-1.78296e-11	-17.8296
				2.39192	6.62861e-12								7.60544	1.56516e-11	15.6516			7.60656	4.84293e-11	48.4293			-7.60584	-2.03115e-11	-20.3115			7.60512	2.53123e-11	25.3123			-7.60672	-1.52368e-11	-15.2368			7.606	1.98239e-11	19.8239			-7.60528	-2.01994e-11	-20.1994
				2.39424	6.358e-12								7.60312	1.67662e-11	16.7662			7.60424	4.72206e-11	47.2206			-7.60352	-2.18481e-11	-21.8481			7.6028	2.44945e-11	24.4945			-7.6044	-1.77509e-11	-17.7509			7.60368	2.06798e-11	20.6798			-7.60296	-1.97763e-11	-19.7763
				2.39656	7.06849e-12								7.6008	1.82456e-11	18.2456			7.60192	4.76175e-11	47.6175			-7.6012	-1.7305e-11	-17.305			7.60048	2.43383e-11	24.3383			-7.60208	-1.73694e-11	-17.3694			7.60136	1.95557e-11	19.5557			-7.60064	-1.98704e-11	-19.8704
				2.39888	5.60817e-12								7.59848	1.60533e-11	16.0533			7.5996	4.73422e-11	47.3422			-7.59888	-1.82504e-11	-18.2504			7.59816	2.45398e-11	24.5398			-7.59976	-1.7671e-11	-17.671			7.59904	1.98656e-11	19.8656			-7.59832	-1.98585e-11	-19.8585
				2.4012	5.58195e-12								7.59616	1.64121e-11	16.4121			7.59728	4.54014e-11	45.4014			-7.59656	-1.88154e-11	-18.8154			7.59584	2.64221e-11	26.4221			-7.59744	-1.85079e-11	-18.5079			7.59672	2.09921e-11	20.9921			-7.596	-1.86676e-11	-18.6676
				2.40352	8.00309e-12								7.59384	1.80608e-11	18.0608			7.59496	4.80967e-11	48.0967			-7.59424	-1.74219e-11	-17.4219			7.59352	2.60859e-11	26.0859			-7.59512	-1.8391e-11	-18.391			7.5944	1.94639e-11	19.4639			-7.59368	-1.82301e-11	-18.2301
				2.40584	6.23998e-12								7.59152	1.57255e-11	15.7255			7.59264	4.74673e-11	47.4673			-7.59192	-1.71215e-11	-17.1215			7.5912	2.55364e-11	25.5364			-7.5928	-1.7969e-11	-17.969			7.59208	1.78593e-11	17.8593			-7.59136	-2.02829e-11	-20.2829
				2.40816	6.26383e-12								7.5892	1.68925e-11	16.8925			7.59032	4.49484e-11	44.9484			-7.5896	-1.91683e-11	-19.1683			7.58888	2.59906e-11	25.9906			-7.59048	-1.6231e-11	-16.231			7.58976	2.02805e-11	20.2805			-7.58904	-2.06131e-11	-20.6131
				2.41048	7.61447e-12								7.58688	1.67483e-11	16.7483			7.588	4.82982e-11	48.2982			-7.58728	-2.03353e-11	-20.3353			7.58656	2.45863e-11	24.5863			-7.58816	-1.39576e-11	-13.9576			7.58744	2.10017e-11	21.0017			-7.58672	-1.92076e-11	-19.2076
				2.4128	6.29124e-12								7.58456	1.56885e-11	15.6885			7.58568	4.71836e-11	47.1836			-7.58496	-1.95629e-11	-19.5629			7.58424	2.56306e-11	25.6306			-7.58584	-1.77247e-11	-17.7247			7.58512	2.13068e-11	21.3068			-7.5844	-1.73766e-11	-17.3766
				2.41512	5.62248e-12								7.58224	1.62178e-11	16.2178			7.58336	4.76986e-11	47.6986			-7.58264	-1.97619e-11	-19.7619			7.58192	2.69311e-11	26.9311			-7.58352	-1.8118e-11	-18.118			7.5828	1.99336e-11	19.9336			-7.58208	-1.81037e-11	-18.1037
				2.41744	6.70609e-12								7.57992	1.66613e-11	16.6613			7.58104	4.66913e-11	46.6913			-7.58032	-1.95843e-11	-19.5843			7.5796	2.66999e-11	26.6999			-7.5812	-1.54418e-11	-15.4418			7.58048	1.77353e-11	17.7353			-7.57976	-1.83589e-11	-18.3589
				2.41976	6.48436e-12								7.5776	1.75279e-11	17.5279			7.57872	4.70298e-11	47.0298			-7.578	-2.01196e-11	-20.1196			7.57728	2.43014e-11	24.3014			-7.57888	-1.85293e-11	-18.5293			7.57816	1.8416e-11	18.416			-7.57744	-1.94508e-11	-19.4508
				2.42208	4.82497e-12								7.57528	1.65969e-11	16.5969			7.5764	4.53263e-11	45.3263			-7.57568	-1.87582e-11	-18.7582			7.57496	2.44242e-11	24.4242			-7.57656	-1.75804e-11	-17.5804			7.57584	1.83755e-11	18.3755			-7.57512	-2.12914e-11	-21.2914
				2.4244	6.70252e-12								7.57296	1.85746e-11	18.5746			7.57408	4.61572e-11	46.1572			-7.57336	-1.84232e-11	-18.4232			7.57264	2.51645e-11	25.1645			-7.57424	-1.68413e-11	-16.8413			7.57352	2.03067e-11	20.3067			-7.5728	-1.92005e-11	-19.2005
				2.42672	8.08534e-12								7.57064	1.73837e-11	17.3837			7.57176	4.92638e-11	49.2638			-7.57104	-1.95927e-11	-19.5927			7.57032	2.50715e-11	25.0715			-7.57192	-1.71942e-11	-17.1942			7.5712	1.98883e-11	19.8883			-7.57048	-1.89179e-11	-18.9179
				2.42904	6.33416e-12								7.56832	1.58614e-11	15.8614			7.56944	4.87774e-11	48.7774			-7.56872	-1.88369e-11	-18.8369			7.568	2.56747e-11	25.6747			-7.5696	-1.67376e-11	-16.7376			7.56888	1.94078e-11	19.4078			-7.56816	-1.90574e-11	-19.0574
				2.43136	6.16011e-12								7.566	1.36405e-11	13.6405			7.56712	4.75889e-11	47.5889			-7.5664	-1.89239e-11	-18.9239			7.56568	2.58118e-11	25.8118			-7.56728	-1.73861e-11	-17.3861			7.56656	1.73336e-11	17.3336			-7.56584	-1.82694e-11	-18.2694
				2.43368	6.3282e-12								7.56368	1.42663e-11	14.2663			7.5648	4.78655e-11	47.8655			-7.56408	-1.64312e-11	-16.4312			7.56336	2.33215e-11	23.3215			-7.56496	-1.61237e-11	-16.1237			7.56424	1.83409e-11	18.3409			-7.56352	-2.20412e-11	-22.0412
				2.436	6.45814e-12								7.56136	1.36941e-11	13.6941			7.56248	4.68486e-11	46.8486			-7.56176	-1.56695e-11	-15.6695			7.56104	2.37661e-11	23.7661			-7.56264	-1.44941e-11	-14.4941			7.56192	1.92791e-11	19.2791			-7.5612	-1.9812e-11	-19.812
				2.43832	6.47125e-12								7.55904	1.50877e-11	15.0877			7.56016	4.56434e-11	45.6434			-7.55944	-1.59902e-11	-15.9902			7.55872	2.36636e-11	23.6636			-7.56032	-1.5437e-11	-15.437			7.5596	1.87045e-11	18.7045			-7.55888	-1.82301e-11	-18.2301
				2.44064	5.38645e-12								7.55672	1.55526e-11	15.5526			7.55784	4.48006e-11	44.8006			-7.55712	-1.80215e-11	-18.0215			7.5564	2.38853e-11	23.8853			-7.558	-1.73074e-11	-17.3074			7.55728	1.9446e-11	19.446			-7.55656	-2.19506e-11	-21.9506
				2.44296	6.95286e-12								7.5544	1.76388e-11	17.6388			7.55552	4.52095e-11	45.2095			-7.5548	-1.83171e-11	-18.3171			7.55408	2.52384e-11	25.2384			-7.55568	-1.65791e-11	-16.5791			7.55496	1.96033e-11	19.6033			-7.55424	-2.05511e-11	-20.5511
				2.44528	5.8609e-12								7.55208	1.61677e-11	16.1677			7.5532	4.57102e-11	45.7102			-7.55248	-1.89716e-11	-18.9716			7.55176	2.54005e-11	25.4005			-7.55336	-1.60617e-11	-16.0617			7.55264	1.98585e-11	19.8585			-7.55192	-2.02817e-11	-20.2817
				2.4476	9.26552e-12								7.54976	1.51819e-11	15.1819			7.55088	4.72611e-11	47.2611			-7.55016	-1.92696e-11	-19.2696			7.54944	2.27958e-11	22.7958			-7.55104	-1.54907e-11	-15.4907			7.55032	2.01124e-11	20.1124			-7.5496	-2.01994e-11	-20.1994
				2.44992	8.00071e-12								7.54744	1.55121e-11	15.5121			7.54856	4.54205e-11	45.4205			-7.54784	-1.82337e-11	-18.2337			7.54712	2.33787e-11	23.3787			-7.54872	-1.65516e-11	-16.5516			7.548	1.82777e-11	18.2777			-7.54728	-1.88095e-11	-18.8095
				2.45224	7.10664e-12								7.54512	1.51163e-11	15.1163			7.54624	4.70942e-11	47.0942			-7.54552	-1.78689e-11	-17.8689			7.5448	2.44015e-11	24.4015			-7.5464	-1.67841e-11	-16.7841			7.54568	1.73634e-11	17.3634			-7.54496	-1.86295e-11	-18.6295
				2.45456	6.9457e-12								7.5428	1.76447e-11	17.6447			7.54392	4.67509e-11	46.7509			-7.5432	-1.90574e-11	-19.0574			7.54248	2.46149e-11	24.6149			-7.54408	-1.57613e-11	-15.7613			7.54336	1.85674e-11	18.5674			-7.54264	-1.82241e-11	-18.2241
				2.45688	5.05028e-12								7.54048	1.72406e-11	17.2406			7.5416	4.73636e-11	47.3636			-7.54088	-1.81312e-11	-18.1312			7.54016	2.52884e-11	25.2884			-7.54176	-1.53595e-11	-15.3595			7.54104	2.19017e-11	21.9017			-7.54032	-1.72252e-11	-17.2252
				2.4592	7.39035e-12								7.53816	1.6883e-11	16.883			7.53928	4.5219e-11	45.219			-7.53856	-1.85627e-11	-18.5627			7.53784	2.53516e-11	25.3516			-7.53944	-1.8664e-11	-18.664			7.53872	1.98215e-11	19.8215			-7.538	-1.99825e-11	-19.9825
				2.46152	5.44367e-12								7.53584	1.57767e-11	15.7767			7.53696	4.56708e-11	45.6708			-7.53624	-1.75506e-11	-17.5506			7.53552	2.47389e-11	24.7389			-7.53712	-1.77485e-11	-17.7485			7.5364	2.05451e-11	20.5451			-7.53568	-2.02316e-11	-20.2316
				2.46384	6.92425e-12								7.53352	1.65754e-11	16.5754			7.53464	4.57519e-11	45.7519			-7.53392	-2.01673e-11	-20.1673			7.5332	2.59953e-11	25.9953			-7.5348	-1.80573e-11	-18.0573			7.53408	1.87856e-11	18.7856			-7.53336	-1.67114e-11	-16.7114
				2.46616	6.54039e-12								7.5312	1.80918e-11	18.0918			7.53232	4.52059e-11	45.2059			-7.5316	-1.91266e-11	-19.1266			7.53088	2.55054e-11	25.5054			-7.53248	-1.69403e-11	-16.9403			7.53176	1.79857e-11	17.9857			-7.53104	-1.76281e-11	-17.6281
				2.46848	6.31509e-12								7.52888	1.63978e-11	16.3978			7.53	4.49389e-11	44.9389			-7.52928	-2.09075e-11	-20.9075			7.52856	2.53337e-11	25.3337			-7.53016	-1.74147e-11	-17.4147			7.52944	1.78474e-11	17.8474			-7.52872	-1.75709e-11	-17.5709
				2.4708	6.82769e-12								7.52656	1.67411e-11	16.7411			7.52768	4.42725e-11	44.2725			-7.52696	-1.75435e-11	-17.5435			7.52624	2.46924e-11	24.6924			-7.52784	-1.71954e-11	-17.1954			7.52712	1.84017e-11	18.4017			-7.5264	-1.87558e-11	-18.7558
				2.47312	8.34641e-12								7.52424	1.83004e-11	18.3004			7.52536	4.47541e-11	44.7541			-7.52464	-1.96296e-11	-19.6296			7.52392	2.51895e-11	25.1895			-7.52552	-1.62906e-11	-16.2906			7.5248	1.93447e-11	19.3447			-7.52408	-1.89585e-11	-18.9585
				2.47544	7.68003e-12								7.52192	1.75959e-11	17.5959			7.52304	4.59403e-11	45.9403			-7.52232	-1.86402e-11	-18.6402			7.5216	2.44778e-11	24.4778			-7.5232	-1.7286e-11	-17.286			7.52248	1.92803e-11	19.2803			-7.52176	-1.82468e-11	-18.2468
				2.47776	6.72874e-12								7.5196	1.7547e-11	17.547			7.52072	4.64886e-11	46.4886			-7.52	-1.79261e-11	-17.9261			7.51928	2.61575e-11	26.1575			-7.52088	-1.76817e-11	-17.6817			7.52016	1.86139e-11	18.6139			-7.51944	-1.76436e-11	-17.6436
				2.48008	6.13031e-12								7.51728	1.70523e-11	17.0523			7.5184	4.58473e-11	45.8473			-7.51768	-1.88417e-11	-18.8417			7.51696	2.5633e-11	25.633			-7.51856	-1.72287e-11	-17.2287			7.51784	1.81991e-11	18.1991			-7.51712	-1.89132e-11	-18.9132
				2.4824	8.90431e-12								7.51496	1.64288e-11	16.4288			7.51608	4.66937e-11	46.6937			-7.51536	-1.83708e-11	-18.3708			7.51464	2.32714e-11	23.2714			-7.51624	-1.83291e-11	-18.3291			7.51552	1.83934e-11	18.3934			-7.5148	-1.96308e-11	-19.6308
				2.48472	8.54072e-12								7.51264	1.73872e-11	17.3872			7.51376	4.70859e-11	47.0859			-7.51304	-1.88762e-11	-18.8762			7.51232	2.29257e-11	22.9257			-7.51392	-1.78594e-11	-17.8594			7.5132	1.94174e-11	19.4174			-7.51248	-1.91218e-11	-19.1218
				2.48704	7.84693e-12								7.51032	1.59877e-11	15.9877			7.51144	4.6249e-11	46.249			-7.51072	-1.84697e-11	-18.4697			7.51	2.58332e-11	25.8332			-7.5116	-1.68509e-11	-16.8509			7.51088	2.03436e-11	20.3436			-7.51016	-1.8608e-11	-18.608
				2.48936	7.76109e-12								7.508	1.57338e-11	15.7338			7.50912	4.52631e-11	45.2631			-7.5084	-1.8273e-11	-18.273			7.50768	2.5e-11	25			-7.50928	-1.6523e-11	-16.523			7.50856	1.95878e-11	19.5878			-7.50784	-1.98037e-11	-19.8037
				2.49168	8.03766e-12								7.50568	1.65206e-11	16.5206			7.5068	4.73672e-11	47.3672			-7.50608	-1.81204e-11	-18.1204			7.50536	2.46161e-11	24.6161			-7.50696	-1.54394e-11	-15.4394			7.50624	1.69223e-11	16.9223			-7.50552	-1.88965e-11	-18.8965
				2.494	9.12843e-12								7.50336	1.48338e-11	14.8338			7.50448	4.4474e-11	44.474			-7.50376	-2.0085e-11	-20.085			7.50304	2.37196e-11	23.7196			-7.50464	-1.57088e-11	-15.7088			7.50392	1.73717e-11	17.3717			-7.5032	-1.97667e-11	-19.7667
				2.49632	7.88626e-12								7.50104	1.62762e-11	16.2762			7.50216	4.54575e-11	45.4575			-7.50144	-1.97929e-11	-19.7929			7.50072	2.39521e-11	23.9521			-7.50232	-1.68246e-11	-16.8246			7.5016	1.87665e-11	18.7665			-7.50088	-1.85293e-11	-18.5293
				2.49864	8.30231e-12								7.49872	1.71739e-11	17.1739			7.49984	4.62788e-11	46.2788			-7.49912	-1.87856e-11	-18.7856			7.4984	2.61217e-11	26.1217			-7.5	-1.59318e-11	-15.9318			7.49928	2.01982e-11	20.1982			-7.49856	-1.82861e-11	-18.2861
				2.50096	8.27131e-12								7.4964	1.75744e-11	17.5744			7.49752	4.5287e-11	45.287			-7.4968	-1.67662e-11	-16.7662			7.49608	2.69264e-11	26.9264			-7.49768	-1.61118e-11	-16.1118			7.49696	1.98847e-11	19.8847			-7.49624	-1.9334e-11	-19.334
				2.50328	8.65636e-12								7.49408	1.69533e-11	16.9533			7.4952	4.4474e-11	44.474			-7.49448	-1.71906e-11	-17.1906			7.49376	2.63446e-11	26.3446			-7.49536	-1.69593e-11	-16.9593			7.49464	2.09254e-11	20.9254			-7.49392	-1.75005e-11	-17.5005
				2.5056	7.77778e-12								7.49176	1.51592e-11	15.1592			7.49288	4.42594e-11	44.2594			-7.49216	-1.74994e-11	-17.4994			7.49144	2.50011e-11	25.0011			-7.49304	-1.6194e-11	-16.194			7.49232	1.91778e-11	19.1778			-7.4916	-1.86938e-11	-18.6938
				2.50792	7.12809e-12								7.48944	1.48624e-11	14.8624			7.49056	4.5616e-11	45.616			-7.48984	-1.77878e-11	-17.7878			7.48912	2.28721e-11	22.8721			-7.49072	-1.44559e-11	-14.4559			7.49	1.87486e-11	18.7486			-7.48928	-2.0091e-11	-20.091
				2.51024	8.99849e-12								7.48712	1.3358e-11	13.358			7.48824	4.42236e-11	44.2236			-7.48752	-1.74707e-11	-17.4707			7.4868	2.39581e-11	23.9581			-7.4884	-1.63788e-11	-16.3788			7.48768	1.96165e-11	19.6165			-7.48696	-1.81514e-11	-18.1514
				2.51256	8.53357e-12								7.4848	1.50054e-11	15.0054			7.48592	4.3891e-11	43.891			-7.4852	-1.85842e-11	-18.5842			7.48448	2.44802e-11	24.4802			-7.48608	-1.5772e-11	-15.772			7.48536	1.80071e-11	18.0071			-7.48464	-1.71763e-11	-17.1763
				2.51488	9.15346e-12								7.48248	1.77306e-11	17.7306			7.4836	4.57841e-11	45.7841			-7.48288	-1.72216e-11	-17.2216			7.48216	2.5422e-11	25.422			-7.48376	-1.4531e-11	-14.531			7.48304	2.01601e-11	20.1601			-7.48232	-1.92315e-11	-19.2315
				2.5172	8.40006e-12								7.48016	1.48445e-11	14.8445			7.48128	4.5169e-11	45.169			-7.48056	-1.68115e-11	-16.8115			7.47984	2.41536e-11	24.1536			-7.48144	-1.71727e-11	-17.1727			7.48072	2.00361e-11	20.0361			-7.48	-1.88977e-11	-18.8977
				2.51952	7.42612e-12								7.47784	1.56814e-11	15.6814			7.47896	4.22483e-11	42.2483			-7.47824	-1.74564e-11	-17.4564			7.47752	2.33716e-11	23.3716			-7.47912	-1.72109e-11	-17.2109			7.4784	1.9502e-11	19.502			-7.47768	-2.04176e-11	-20.4176
				2.52184	9.59334e-12								7.47552	1.62357e-11	16.2357			7.47664	4.28837e-11	42.8837			-7.47592	-1.96356e-11	-19.6356			7.4752	2.33632e-11	23.3632			-7.4768	-1.80179e-11	-18.0179			7.47608	1.769e-11	17.69			-7.47536	-1.99062e-11	-19.9062
				2.52416	6.59284e-12								7.4732	1.62786e-11	16.2786			7.47432	4.54718e-11	45.4718			-7.4736	-1.87201e-11	-18.7201			7.47288	2.17372e-11	21.7372			-7.47448	-1.6287e-11	-16.287			7.47376	1.87415e-11	18.7415			-7.47304	-1.95462e-11	-19.5462
				2.52648	4.77967e-12								7.47088	1.53583e-11	15.3583			7.472	4.54336e-11	45.4336			-7.47128	-1.82396e-11	-18.2396			7.47056	2.22116e-11	22.2116			-7.47216	-1.6411e-11	-16.411			7.47144	1.93542e-11	19.3542			-7.47072	-1.91409e-11	-19.1409
				2.5288	5.85851e-12								7.46856	1.78569e-11	17.8569			7.46968	4.28754e-11	42.8754			-7.46896	-1.8943e-11	-18.943			7.46824	2.30592e-11	23.0592			-7.46984	-1.65695e-11	-16.5695			7.46912	1.76018e-11	17.6018			-7.4684	-1.89477e-11	-18.9477
				2.53112	5.92646e-12								7.46624	1.53297e-11	15.3297			7.46736	4.38028e-11	43.8028			-7.46664	-1.86283e-11	-18.6283			7.46592	2.38615e-11	23.8615			-7.46752	-1.56039e-11	-15.6039			7.4668	1.88178e-11	18.8178			-7.46608	-1.90109e-11	-19.0109
				2.53344	6.91471e-12								7.46392	1.57374e-11	15.7374			7.46504	4.35275e-11	43.5275			-7.46432	-1.77151e-11	-17.7151			7.4636	2.22546e-11	22.2546			-7.4652	-1.60355e-11	-16.0355			7.46448	1.82432e-11	18.2432			-7.46376	-1.88309e-11	-18.8309
				2.53576	5.092e-12								7.4616	1.79368e-11	17.9368			7.46272	4.54646e-11	45.4646			-7.462	-1.8515e-11	-18.515			7.46128	2.23821e-11	22.3821			-7.46288	-1.62381e-11	-16.2381			7.46216	2.00218e-11	20.0218			-7.46144	-1.97119e-11	-19.7119
				2.53808	5.80725e-12								7.45928	1.76877e-11	17.6877			7.4604	4.65435e-11	46.5435			-7.45968	-1.71966e-11	-17.1966			7.45896	2.49427e-11	24.9427			-7.46056	-1.64908e-11	-16.4908			7.45984	1.95247e-11	19.5247			-7.45912	-1.80513e-11	-18.0513
				2.5404	7.71699e-12								7.45696	1.60008e-11	16.0008			7.45808	4.50331e-11	45.0331			-7.45736	-1.76949e-11	-17.6949			7.45664	2.47448e-11	24.7448			-7.45824	-1.72502e-11	-17.2502			7.45752	1.88535e-11	18.8535			-7.4568	-1.9483e-11	-19.483
				2.54272	7.2473e-12								7.45464	1.73312e-11	17.3312			7.45576	4.49043e-11	44.9043			-7.45504	-1.95796e-11	-19.5796			7.45432	2.40916e-11	24.0916			-7.45592	-1.98788e-11	-19.8788			7.4552	1.93959e-11	19.3959			-7.45448	-1.69188e-11	-16.9188
				2.54504	8.43582e-12								7.45232	1.65266e-11	16.5266			7.45344	4.38696e-11	43.8696			-7.45272	-1.75864e-11	-17.5864			7.452	2.49213e-11	24.9213			-7.4536	-1.87165e-11	-18.7165			7.45288	2.01827e-11	20.1827			-7.45216	-1.96141e-11	-19.6141
				2.54736	7.12929e-12								7.45	1.72776e-11	17.2776			7.45112	4.38672e-11	43.8672			-7.4504	-1.68091e-11	-16.8091			7.44968	2.48831e-11	24.8831			-7.45128	-1.73456e-11	-17.3456			7.45056	1.80298e-11	18.0298			-7.44984	-1.86676e-11	-18.6676
				2.54968	7.40585e-12								7.44768	1.73622e-11	17.3622			7.4488	4.5523e-11	45.523			-7.44808	-1.58948e-11	-15.8948			7.44736	2.46054e-11	24.6054			-7.44896	-1.68175e-11	-16.8175			7.44824	2.0625e-11	20.625			-7.44752	-1.53607e-11	-15.3607
				2.552	8.51092e-12								7.44536	1.62273e-11	16.2273			7.44648	4.74971e-11	47.4971			-7.44576	-1.65254e-11	-16.5254			7.44504	2.35206e-11	23.5206			-7.44664	-1.58447e-11	-15.8447			7.44592	1.85376e-11	18.5376			-7.4452	-1.77902e-11	-17.7902
				2.55432	6.66318e-12								7.44304	1.54167e-11	15.4167			7.44416	4.61131e-11	46.1131			-7.44344	-1.97476e-11	-19.7476			7.44272	2.42799e-11	24.2799			-7.44432	-1.5921e-11	-15.921			7.4436	1.73241e-11	17.3241			-7.44288	-1.94913e-11	-19.4913
				2.55664	7.16743e-12								7.44072	1.48695e-11	14.8695			7.44184	4.51678e-11	45.1678			-7.44112	-1.89609e-11	-18.9609			7.4404	2.36159e-11	23.6159			-7.442	-1.67221e-11	-16.7221			7.44128	1.818e-11	18.18			-7.44056	-2.02185e-11	-20.2185
				2.55896	6.99577e-12								7.4384	1.37156e-11	13.7156			7.43952	4.30029e-11	43.0029			-7.4388	-1.86533e-11	-18.6533			7.43808	2.39378e-11	23.9378			-7.43968	-1.6262e-11	-16.262			7.43896	1.68174e-11	16.8174			-7.43824	-1.86712e-11	-18.6712
				2.56128	7.37247e-12								7.43608	1.56647e-11	15.6647			7.4372	4.51332e-11	45.1332			-7.43648	-1.8639e-11	-18.639			7.43576	2.43073e-11	24.3073			-7.43736	-1.67948e-11	-16.7948			7.43664	1.72358e-11	17.2358			-7.43592	-1.79142e-11	-17.9142
				2.5636	5.30777e-12								7.43376	1.6126e-11	16.126			7.43488	4.44609e-11	44.4609			-7.43416	-1.81204e-11	-18.1204			7.43344	2.4628e-11	24.628			-7.43504	-1.61606e-11	-16.1606			7.43432	1.9322e-11	19.322			-7.4336	-1.85496e-11	-18.5496
				2.56592	4.25038e-12								7.43144	1.56742e-11	15.6742			7.43256	4.48793e-11	44.8793			-7.43184	-1.77115e-11	-17.7115			7.43112	2.29817e-11	22.9817			-7.43272	-1.81574e-11	-18.1574			7.432	1.79332e-11	17.9332			-7.43128	-1.87248e-11	-18.7248
				2.56824	7.78374e-12								7.42912	1.72835e-11	17.2835			7.43024	4.48912e-11	44.8912			-7.42952	-1.83398e-11	-18.3398			7.4288	2.28113e-11	22.8113			-7.4304	-1.7795e-11	-17.795			7.42968	1.78545e-11	17.8545			-7.42896	-2.1382e-11	-21.382
				2.57056	6.87179e-12								7.4268	1.73634e-11	17.3634			7.42792	4.46993e-11	44.6993			-7.4272	-1.76519e-11	-17.6519			7.42648	2.28935e-11	22.8935			-7.42808	-1.73742e-11	-17.3742			7.42736	1.78319e-11	17.8319			-7.42664	-2.13939e-11	-21.3939
				2.57288	8.44059e-12								7.42448	1.75518e-11	17.5518			7.4256	4.29767e-11	42.9767			-7.42488	-1.87737e-11	-18.7737			7.42416	2.36219e-11	23.6219			-7.42576	-1.55705e-11	-15.5705			7.42504	1.73884e-11	17.3884			-7.42432	-1.88297e-11	-18.8297
				2.5752	7.46546e-12								7.42216	1.72776e-11	17.2776			7.42328	4.51034e-11	45.1034			-7.42256	-1.79965e-11	-17.9965			7.42184	2.40224e-11	24.0224			-7.42344	-1.67376e-11	-16.7376			7.42272	1.80667e-11	18.0667			-7.422	-1.63967e-11	-16.3967
				2.57752	7.83739e-12								7.41984	1.6033e-11	16.033			7.42096	4.28718e-11	42.8718			-7.42024	-1.94735e-11	-19.4735			7.41952	2.27993e-11	22.7993			-7.42112	-1.66327e-11	-16.6327			7.4204	1.98549e-11	19.8549			-7.41968	-1.8335e-11	-18.335
				2.57984	8.21528e-12								7.41752	1.62655e-11	16.2655			7.41864	4.24856e-11	42.4856			-7.41792	-1.92231e-11	-19.2231			7.4172	2.312e-11	23.12			-7.4188	-1.67865e-11	-16.7865			7.41808	1.75351e-11	17.5351			-7.41736	-1.82992e-11	-18.2992
				2.58216	7.40823e-12								7.4152	1.46073e-11	14.6073			7.41632	4.39018e-11	43.9018			-7.4156	-1.61094e-11	-16.1094			7.41488	2.51239e-11	25.1239			-7.41648	-1.95188e-11	-19.5188			7.41576	1.64693e-11	16.4693			-7.41504	-1.80787e-11	-18.0787
				2.58448	8.77795e-12								7.41288	1.65838e-11	16.5838			7.414	4.28372e-11	42.8372			-7.41328	-1.82885e-11	-18.2885			7.41256	2.54851e-11	25.4851			-7.41416	-1.76794e-11	-17.6794			7.41344	1.81359e-11	18.1359			-7.41272	-1.96058e-11	-19.6058
				2.5868	9.85322e-12								7.41056	1.56229e-11	15.6229			7.41168	4.42189e-11	44.2189			-7.41096	-1.68795e-11	-16.8795			7.41024	2.42752e-11	24.2752			-7.41184	-1.47695e-11	-14.7695			7.41112	1.85603e-11	18.5603			-7.4104	-1.87701e-11	-18.7701
				2.58912	9.08789e-12								7.40824	1.45894e-11	14.5894			7.40936	4.40508e-11	44.0508			-7.40864	-1.60367e-11	-16.0367			7.40792	2.47997e-11	24.7997			-7.40952	-1.69963e-11	-16.9963			7.4088	1.73717e-11	17.3717			-7.40808	-1.79965e-11	-17.9965
				2.59144	7.67884e-12								7.40592	1.46085e-11	14.6085			7.40704	4.54205e-11	45.4205			-7.40632	-1.77831e-11	-17.7831			7.4056	2.43383e-11	24.3383			-7.4072	-1.76281e-11	-17.6281			7.40648	1.87677e-11	18.7677			-7.40576	-1.56731e-11	-15.6731
				2.59376	8.41198e-12								7.4036	1.18595e-11	11.8595			7.40472	4.48423e-11	44.8423			-7.404	-1.70595e-11	-17.0595			7.40328	2.46697e-11	24.6697			-7.40488	-1.70368e-11	-17.0368			7.40416	1.93101e-11	19.3101			-7.40344	-1.56194e-11	-15.6194
				2.59608	9.23571e-12								7.40128	1.46812e-11	14.6812			7.4024	4.54396e-11	45.4396			-7.40168	-1.63549e-11	-16.3549			7.40096	2.38424e-11	23.8424			-7.40256	-1.71727e-11	-17.1727			7.40184	1.74898e-11	17.4898			-7.40112	-1.73921e-11	-17.3921
				2.5984	7.70983e-12								7.39896	1.62822e-11	16.2822			7.40008	4.4797e-11	44.797			-7.39936	-1.7764e-11	-17.764			7.39864	2.45028e-11	24.5028			-7.40024	-1.80561e-11	-18.0561			7.39952	1.68699e-11	16.8699			-7.3988	-1.93471e-11	-19.3471
				2.60072	7.92799e-12								7.39664	1.57648e-11	15.7648			7.39776	4.40603e-11	44.0603			-7.39704	-1.87212e-11	-18.7212			7.39632	2.4336e-11	24.336			-7.39792	-1.57184e-11	-15.7184			7.3972	1.51521e-11	15.1521			-7.39648	-1.70666e-11	-17.0666
				2.60304	8.60867e-12								7.39432	1.56551e-11	15.6551			7.39544	4.35024e-11	43.5024			-7.39472	-1.7286e-11	-17.286			7.394	2.5149e-11	25.149			-7.3956	-1.73539e-11	-17.3539			7.39488	1.8546e-11	18.546			-7.39416	-2.07871e-11	-20.7871
				2.60536	7.31406e-12								7.392	1.787e-11	17.87			7.39312	4.41378e-11	44.1378			-7.3924	-1.78939e-11	-17.8939			7.39168	2.64829e-11	26.4829			-7.39328	-1.78808e-11	-17.8808			7.39256	1.94078e-11	19.4078			-7.39184	-1.8912e-11	-18.912
				2.60768	6.04925e-12								7.38968	1.65301e-11	16.5301			7.3908	4.34965e-11	43.4965			-7.39008	-1.73432e-11	-17.3432			7.38936	2.61134e-11	26.1134			-7.39096	-1.78403e-11	-17.8403			7.39024	1.61797e-11	16.1797			-7.38952	-1.92338e-11	-19.2338
				2.61	7.52625e-12								7.38736	1.61916e-11	16.1916			7.38848	4.14854e-11	41.4854			-7.38776	-1.77795e-11	-17.7795			7.38704	2.56735e-11	25.6735			-7.38864	-1.60736e-11	-16.0736			7.38792	1.76352e-11	17.6352			-7.3872	-1.86819e-11	-18.6819
				2.61232	7.57751e-12								7.38504	1.55025e-11	15.5025			7.38616	4.25142e-11	42.5142			-7.38544	-1.83732e-11	-18.3732			7.38472	2.50524e-11	25.0524			-7.38632	-1.71203e-11	-17.1203			7.3856	1.97035e-11	19.7035			-7.38488	-1.87534e-11	-18.7534
				2.61464	7.89223e-12								7.38272	1.46574e-11	14.6574			7.38384	4.49937e-11	44.9937			-7.38312	-1.78153e-11	-17.8153			7.3824	2.25955e-11	22.5955			-7.384	-1.78391e-11	-17.8391			7.38328	1.70618e-11	17.0618			-7.38256	-1.99598e-11	-19.9598
				2.61696	8.93292e-12								7.3804	1.29252e-11	12.9252			7.38152	4.278e-11	42.78			-7.3808	-1.74433e-11	-17.4433			7.38008	2.39461e-11	23.9461			-7.38168	-1.80024e-11	-18.0024			7.38096	1.64908e-11	16.4908			-7.38024	-2.06191e-11	-20.6191
				2.61928	9.88064e-12								7.37808	1.16318e-11	11.6318			7.3792	4.29326e-11	42.9326			-7.37848	-1.7286e-11	-17.286			7.37776	2.35182e-11	23.5182			-7.37936	-1.80334e-11	-18.0334			7.37864	1.74969e-11	17.4969			-7.37792	-1.98752e-11	-19.8752
				2.6216	9.55877e-12								7.37576	1.51747e-11	15.1747			7.37688	4.42248e-11	44.2248			-7.37616	-1.89799e-11	-18.9799			7.37544	2.41118e-11	24.1118			-7.37704	-1.58006e-11	-15.8006			7.37632	1.81836e-11	18.1836			-7.3756	-1.87797e-11	-18.7797
				2.62392	9.58738e-12								7.37344	1.5909e-11	15.909			7.37456	4.42236e-11	44.2236			-7.37384	-1.75077e-11	-17.5077			7.37312	2.34884e-11	23.4884			-7.37472	-1.58292e-11	-15.8292			7.374	1.72955e-11	17.2955			-7.37328	-1.90455e-11	-19.0455
				2.62624	6.21614e-12								7.37112	1.558e-11	15.58			7.37224	4.34249e-11	43.4249			-7.37152	-1.75697e-11	-17.5697			7.3708	2.38985e-11	23.8985			-7.3724	-1.61177e-11	-16.1177			7.37168	1.93268e-11	19.3268			-7.37096	-1.9638e-11	-19.638
				2.62856	9.24644e-12								7.3688	1.27929e-11	12.7929			7.36992	4.35775e-11	43.5775			-7.3692	-1.76209e-11	-17.6209			7.36848	2.31486e-11	23.1486			-7.37008	-1.75244e-11	-17.5244			7.36936	1.91349e-11	19.1349			-7.36864	-1.9632e-11	-19.632
				2.63088	8.55741e-12								7.36648	1.46275e-11	14.6275			7.3676	4.57352e-11	45.7352			-7.36688	-1.854e-11	-18.54			7.36616	2.3176e-11	23.176			-7.36776	-1.7801e-11	-17.801			7.36704	1.63847e-11	16.3847			-7.36632	-1.98883e-11	-19.8883
				2.6332	7.70626e-12								7.36416	1.37001e-11	13.7001			7.36528	4.44716e-11	44.4716			-7.36456	-1.98108e-11	-19.8108			7.36384	2.31641e-11	23.1641			-7.36544	-1.61404e-11	-16.1404			7.36472	1.69843e-11	16.9843			-7.364	-2.13558e-11	-21.3558
				2.63552	9.22856e-12								7.36184	1.33902e-11	13.3902			7.36296	4.28062e-11	42.8062			-7.36224	-1.93554e-11	-19.3554			7.36152	2.25764e-11	22.5764			-7.36312	-1.63812e-11	-16.3812			7.3624	1.56802e-11	15.6802			-7.36168	-1.8645e-11	-18.645
				2.63784	7.22584e-12								7.35952	1.43391e-11	14.3391			7.36064	4.28301e-11	42.8301			-7.35992	-2.03389e-11	-20.3389			7.3592	2.48009e-11	24.8009			-7.3608	-1.83207e-11	-18.3207			7.36008	1.47217e-11	14.7217			-7.35936	-1.81455e-11	-18.1455
				2.64016	4.71053e-12								7.3572	1.58435e-11	15.8435			7.35832	4.30196e-11	43.0196			-7.3576	-1.92672e-11	-19.2672			7.35688	2.46387e-11	24.6387			-7.35848	-1.69999e-11	-16.9999			7.35776	1.64002e-11	16.4002			-7.35704	-1.62679e-11	-16.2679
				2.64248	5.53665e-12								7.35488	1.58912e-11	15.8912			7.356	4.47172e-11	44.7172			-7.35528	-1.96058e-11	-19.6058			7.35456	2.56377e-11	25.6377			-7.35616	-1.84769e-11	-18.4769			7.35544	2.02507e-11	20.2507			-7.35472	-1.78546e-11	-17.8546
				2.6448	7.16266e-12								7.35256	1.55645e-11	15.5645			7.35368	4.61155e-11	46.1155			-7.35296	-1.7305e-11	-17.305			7.35224	2.36433e-11	23.6433			-7.35384	-1.77509e-11	-17.7509			7.35312	1.80846e-11	18.0846			-7.3524	-1.90801e-11	-19.0801
				2.64712	7.9411e-12								7.35024	1.50257e-11	15.0257			7.35136	4.35561e-11	43.5561			-7.35064	-1.72025e-11	-17.2025			7.34992	2.37518e-11	23.7518			-7.35152	-1.78224e-11	-17.8224			7.3508	1.57827e-11	15.7827			-7.35008	-1.85496e-11	-18.5496
				2.64944	8.71e-12								7.34792	1.37502e-11	13.7502			7.34904	4.39709e-11	43.9709			-7.34832	-1.65791e-11	-16.5791			7.3476	2.31236e-11	23.1236			-7.3492	-1.57959e-11	-15.7959			7.34848	1.50138e-11	15.0138			-7.34776	-2.05702e-11	-20.5702
				2.65176	7.98402e-12								7.3456	1.33925e-11	13.3925			7.34672	4.20147e-11	42.0147			-7.346	-1.73384e-11	-17.3384			7.34528	2.30902e-11	23.0902			-7.34688	-1.62703e-11	-16.2703			7.34616	1.8782e-11	18.782			-7.34544	-2.08122e-11	-20.8122
				2.65408	7.30095e-12								7.34328	1.28025e-11	12.8025			7.3444	4.29719e-11	42.9719			-7.34368	-1.71405e-11	-17.1405			7.34296	2.25681e-11	22.5681			-7.34456	-1.57553e-11	-15.7553			7.34384	1.8515e-11	18.515			-7.34312	-1.78296e-11	-17.8296
				2.6564	7.72176e-12								7.34096	1.46907e-11	14.6907			7.34208	4.36288e-11	43.6288			-7.34136	-1.73456e-11	-17.3456			7.34064	2.29925e-11	22.9925			-7.34224	-1.64169e-11	-16.4169			7.34152	1.5952e-11	15.952			-7.3408	-1.80191e-11	-18.0191
				2.65872	7.92203e-12								7.33864	1.50519e-11	15.0519			7.33976	4.28921e-11	42.8921			-7.33904	-2.02102e-11	-20.2102			7.33832	2.31331e-11	23.1331			-7.33992	-1.92255e-11	-19.2255			7.3392	1.75529e-11	17.5529			-7.33848	-1.88118e-11	-18.8118
				2.66104	8.53238e-12								7.33632	1.44249e-11	14.4249			7.33744	4.35763e-11	43.5763			-7.33672	-1.78844e-11	-17.8844			7.336	2.42167e-11	24.2167			-7.3376	-1.7907e-11	-17.907			7.33688	1.87474e-11	18.7474			-7.33616	-1.98585e-11	-19.8585
				2.66336	9.00802e-12								7.334	1.5909e-11	15.909			7.33512	4.29243e-11	42.9243			-7.3344	-1.73551e-11	-17.3551			7.33368	2.2971e-11	22.971			-7.33528	-1.78033e-11	-17.8033			7.33456	1.85519e-11	18.5519			-7.33384	-1.99908e-11	-19.9908
				2.66568	7.28307e-12								7.33168	1.75267e-11	17.5267			7.3328	4.27538e-11	42.7538			-7.33208	-1.75196e-11	-17.5196			7.33136	2.18326e-11	21.8326			-7.33296	-1.62906e-11	-16.2906			7.33224	1.90907e-11	19.0907			-7.33152	-1.86628e-11	-18.6628
				2.668	8.46324e-12								7.32936	1.6672e-11	16.672			7.33048	4.37003e-11	43.7003			-7.32976	-1.65302e-11	-16.5302			7.32904	2.0799e-11	20.799			-7.33064	-1.61594e-11	-16.1594			7.32992	1.94531e-11	19.4531			-7.3292	-1.94317e-11	-19.4317
				2.67032	7.81235e-12								7.32704	1.68961e-11	16.8961			7.32816	4.16285e-11	41.6285			-7.32744	-1.65433e-11	-16.5433			7.32672	2.17718e-11	21.7718			-7.32832	-1.75184e-11	-17.5184			7.3276	1.81454e-11	18.1454			-7.32688	-1.91492e-11	-19.1492
				2.67264	8.03766e-12								7.32472	1.55669e-11	15.5669			7.32584	4.21673e-11	42.1673			-7.32512	-1.68747e-11	-16.8747			7.3244	2.2245e-11	22.245			-7.326	-1.81812e-11	-18.1812			7.32528	1.97202e-11	19.7202			-7.32456	-1.73599e-11	-17.3599
				2.67496	8.9055e-12								7.3224	1.64872e-11	16.4872			7.32352	4.27419e-11	42.7419			-7.3228	-1.78618e-11	-17.8618			7.32208	2.30425e-11	23.0425			-7.32368	-1.74278e-11	-17.4278			7.32296	1.82956e-11	18.2956			-7.32224	-1.76126e-11	-17.6126
				2.67728	7.16266e-12								7.32008	1.49697e-11	14.9697			7.3212	4.45109e-11	44.5109			-7.32048	-1.74719e-11	-17.4719			7.31976	2.22546e-11	22.2546			-7.32136	-1.63573e-11	-16.3573			7.32064	1.78927e-11	17.8927			-7.31992	-2.03496e-11	-20.3496
				2.6796	6.8706e-12								7.31776	1.45966e-11	14.5966			7.31888	4.37027e-11	43.7027			-7.31816	-1.76877e-11	-17.6877			7.31744	2.2704e-11	22.704			-7.31904	-1.78701e-11	-17.8701			7.31832	1.90252e-11	19.0252			-7.3176	-2.06501e-11	-20.6501
				2.68192	8.08654e-12								7.31544	1.57422e-11	15.7422			7.31656	4.08584e-11	40.8584			-7.31584	-1.81681e-11	-18.1681			7.31512	2.40606e-11	24.0606			-7.31672	-1.9266e-11	-19.266			7.316	1.85591e-11	18.5591			-7.31528	-1.85699e-11	-18.5699
				2.68424	7.12094e-12								7.31312	1.58733e-11	15.8733			7.31424	4.23258e-11	42.3258			-7.31352	-1.8974e-11	-18.974			7.3128	2.30795e-11	23.0795			-7.3144	-1.7379e-11	-17.379			7.31368	1.75327e-11	17.5327			-7.31296	-1.97739e-11	-19.7739
				2.68656	7.10544e-12								7.3108	1.45703e-11	14.5703			7.31192	4.12553e-11	41.2553			-7.3112	-1.85532e-11	-18.5532			7.31048	2.46852e-11	24.6852			-7.31208	-1.71918e-11	-17.1918			7.31136	1.92111e-11	19.2111			-7.31064	-1.73623e-11	-17.3623
				2.68888	6.3878e-12								7.30848	1.36131e-11	13.6131			7.3096	4.25499e-11	42.5499			-7.30888	-1.74254e-11	-17.4254			7.30816	2.43169e-11	24.3169			-7.30976	-1.76686e-11	-17.6686			7.30904	1.81561e-11	18.1561			-7.30832	-1.91289e-11	-19.1289
				2.6912	8.03885e-12								7.30616	1.50841e-11	15.0841			7.30728	4.18192e-11	41.8192			-7.30656	-1.70237e-11	-17.0237			7.30584	2.3393e-11	23.393			-7.30744	-1.6858e-11	-16.858			7.30672	1.94627e-11	19.4627			-7.306	-1.81204e-11	-18.1204
				2.69352	9.6744e-12								7.30384	1.62905e-11	16.2905			7.30496	4.0937e-11	40.937			-7.30424	-1.67448e-11	-16.7448			7.30352	2.19077e-11	21.9077			-7.30512	-1.42521e-11	-14.2521			7.3044	1.89489e-11	18.9489			-7.30368	-1.86962e-11	-18.6962
				2.69584	9.66725e-12								7.30152	1.59234e-11	15.9234			7.30264	4.16416e-11	41.6416			-7.30192	-1.7218e-11	-17.218			7.3012	2.02507e-11	20.2507			-7.3028	-1.79833e-11	-17.9833			7.30208	1.57135e-11	15.7135			-7.30136	-1.75661e-11	-17.5661
				2.69816	8.29158e-12								7.2992	1.46275e-11	14.6275			7.30032	4.13066e-11	41.3066			-7.2996	-1.65957e-11	-16.5957			7.29888	2.23893e-11	22.3893			-7.30048	-1.76162e-11	-17.6162			7.29976	1.80512e-11	18.0512			-7.29904	-1.73992e-11	-17.3992
				2.70048	6.65722e-12								7.29688	1.42473e-11	14.2473			7.298	4.23473e-11	42.3473			-7.29728	-1.81824e-11	-18.1824			7.29656	2.10696e-11	21.0696			-7.29816	-1.72156e-11	-17.2156			7.29744	1.7814e-11	17.814			-7.29672	-1.90705e-11	-19.0705
				2.7028	9.87348e-12								7.29456	1.54179e-11	15.4179			7.29568	4.1818e-11	41.818			-7.29496	-1.68354e-11	-16.8354			7.29424	2.18981e-11	21.8981			-7.29584	-1.70154e-11	-17.0154			7.29512	1.82146e-11	18.2146			-7.2944	-1.70106e-11	-17.0106
				2.70512	7.33194e-12								7.29224	1.51986e-11	15.1986			7.29336	4.31221e-11	43.1221			-7.29264	-1.64014e-11	-16.4014			7.29192	2.33525e-11	23.3525			-7.29352	-1.50818e-11	-15.0818			7.2928	1.76209e-11	17.6209			-7.29208	-1.90121e-11	-19.0121
				2.70744	1.00511e-11								7.28992	1.59639e-11	15.9639			7.29104	4.16118e-11	41.6118			-7.29032	-1.85663e-11	-18.5663			7.2896	2.3914e-11	23.914			-7.2912	-1.53429e-11	-15.3429			7.29048	2.00921e-11	20.0921			-7.28976	-1.86497e-11	-18.6497
				2.70976	1.08498e-11								7.2876	1.5226e-11	15.226			7.28872	4.28062e-11	42.8062			-7.288	-1.79094e-11	-17.9094			7.28728	2.56937e-11	25.6937			-7.28888	-1.64825e-11	-16.4825			7.28816	1.86318e-11	18.6318			-7.28744	-1.92994e-11	-19.2994
				2.71208	9.45148e-12								7.28528	1.41531e-11	14.1531			7.2864	4.12124e-11	41.2124			-7.28568	-1.73587e-11	-17.3587			7.28496	2.45195e-11	24.5195			-7.28656	-1.47897e-11	-14.7897			7.28584	1.78164e-11	17.8164			-7.28512	-1.8794e-11	-18.794
				2.7144	8.68616e-12								7.28296	1.53118e-11	15.3118			7.28408	4.00918e-11	40.0918			-7.28336	-1.82122e-11	-18.2122			7.28264	2.34109e-11	23.4109			-7.28424	-1.70237e-11	-17.0237			7.28352	1.51437e-11	15.1437			-7.2828	-1.86092e-11	-18.6092
				2.71672	8.86259e-12								7.28064	1.54191e-11	15.4191			7.28176	4.18859e-11	41.8859			-7.28104	-1.73265e-11	-17.3265			7.28032	2.0836e-11	20.836			-7.28192	-1.60045e-11	-16.0045			7.2812	1.71178e-11	17.1178			-7.28048	-1.94782e-11	-19.4782
				2.71904	9.4944e-12								7.27832	1.58566e-11	15.8566			7.27944	4.2935e-11	42.935			-7.27872	-1.67018e-11	-16.7018			7.278	2.31451e-11	23.1451			-7.2796	-1.63776e-11	-16.3776			7.27888	1.90001e-11	19.0001			-7.27816	-1.88452e-11	-18.8452
				2.72136	7.63712e-12								7.276	1.61236e-11	16.1236			7.27712	4.21303e-11	42.1303			-7.2764	-1.91206e-11	-19.1206			7.27568	2.32213e-11	23.2213			-7.27728	-1.42569e-11	-14.2569			7.27656	1.86437e-11	18.6437			-7.27584	-1.98144e-11	-19.8144
				2.72368	7.87792e-12								7.27368	1.50519e-11	15.0519			7.2748	4.09156e-11	40.9156			-7.27408	-1.71751e-11	-17.1751			7.27336	2.2071e-11	22.071			-7.27496	-1.50472e-11	-15.0472			7.27424	1.6002e-11	16.002			-7.27352	-1.82504e-11	-18.2504
				2.726	7.66692e-12								7.27136	1.45024e-11	14.5024			7.27248	4.16249e-11	41.6249			-7.27176	-1.8155e-11	-18.155			7.27104	2.33e-11	23.3			-7.27264	-1.51772e-11	-15.1772			7.27192	1.82885e-11	18.2885			-7.2712	-1.87832e-11	-18.7832
				2.72832	9.30962e-12								7.26904	1.60378e-11	16.0378			7.27016	4.28623e-11	42.8623			-7.26944	-1.77819e-11	-17.7819			7.26872	2.20006e-11	22.0006			-7.27032	-1.5139e-11	-15.139			7.2696	1.8354e-11	18.354			-7.26888	-1.81157e-11	-18.1157
				2.73064	8.87689e-12								7.26672	1.58161e-11	15.8161			7.26784	4.22638e-11	42.2638			-7.26712	-1.85913e-11	-18.5913			7.2664	2.33036e-11	23.3036			-7.268	-1.6678e-11	-16.678			7.26728	1.87546e-11	18.7546			-7.26656	-1.59079e-11	-15.9079
				2.73296	9.12962e-12								7.2644	1.38074e-11	13.8074			7.26552	4.08691e-11	40.8691			-7.2648	-1.82051e-11	-18.2051			7.26408	2.41536e-11	24.1536			-7.26568	-1.81073e-11	-18.1073			7.26496	1.84709e-11	18.4709			-7.26424	-1.80894e-11	-18.0894
				2.73528	1.01417e-11								7.26208	1.50996e-11	15.0996			7.2632	4.20886e-11	42.0886			-7.26248	-1.54597e-11	-15.4597			7.26176	2.41679e-11	24.1679			-7.26336	-1.79476e-11	-17.9476			7.26264	1.67972e-11	16.7972			-7.26192	-1.91325e-11	-19.1325
				2.7376	9.374e-12								7.25976	1.64729e-11	16.4729			7.26088	4.242e-11	42.42			-7.26016	-1.58114e-11	-15.8114			7.25944	2.34562e-11	23.4562			-7.26104	-1.85198e-11	-18.5198			7.26032	1.65659e-11	16.5659			-7.2596	-1.76686e-11	-17.6686
				2.73992	8.27131e-12								7.25744	1.76328e-11	17.6328			7.25856	4.2302e-11	42.302			-7.25784	-1.77926e-11	-17.7926			7.25712	2.27171e-11	22.7171			-7.25872	-1.75792e-11	-17.5792			7.258	1.85364e-11	18.5364			-7.25728	-1.78236e-11	-17.8236
				2.74224	8.23912e-12								7.25512	1.48636e-11	14.8636			7.25624	4.36336e-11	43.6336			-7.25552	-1.85448e-11	-18.5448			7.2548	2.2797e-11	22.797			-7.2564	-1.48136e-11	-14.8136			7.25568	1.66744e-11	16.6744			-7.25496	-1.75256e-11	-17.5256
				2.74456	9.01041e-12								7.2528	1.37681e-11	13.7681			7.25392	4.33546e-11	43.3546			-7.2532	-1.87141e-11	-18.7141			7.25248	2.15536e-11	21.5536			-7.25408	-1.64181e-11	-16.4181			7.25336	1.66815e-11	16.6815			-7.25264	-1.8068e-11	-18.068
				2.74688	8.45012e-12								7.25048	1.48254e-11	14.8254			7.2516	4.20266e-11	42.0266			-7.25088	-1.78212e-11	-17.8212			7.25016	2.11447e-11	21.1447			-7.25176	-1.6771e-11	-16.771			7.25104	1.7094e-11	17.094			-7.25032	-1.70821e-11	-17.0821
				2.7492	1.02693e-11								7.24816	1.61594e-11	16.1594			7.24928	4.31293e-11	43.1293			-7.24856	-1.79714e-11	-17.9714			7.24784	2.2363e-11	22.363			-7.24944	-1.58125e-11	-15.8125			7.24872	1.53571e-11	15.3571			-7.248	-1.57386e-11	-15.7386
				2.75152	8.34522e-12								7.24584	1.64515e-11	16.4515			7.24696	4.34202e-11	43.4202			-7.24624	-1.82706e-11	-18.2706			7.24552	2.06762e-11	20.6762			-7.24712	-1.73325e-11	-17.3325			7.2464	1.73884e-11	17.3884			-7.24568	-1.81133e-11	-18.1133
				2.75384	9.82461e-12								7.24352	1.58256e-11	15.8256			7.24464	4.29529e-11	42.9529			-7.24392	-1.71513e-11	-17.1513			7.2432	2.13307e-11	21.3307			-7.2448	-1.88989e-11	-18.8989			7.24408	1.83445e-11	18.3445			-7.24336	-1.78033e-11	-17.8033
				2.75616	1.03253e-11								7.2412	1.72621e-11	17.2621			7.24232	4.33618e-11	43.3618			-7.2416	-1.66816e-11	-16.6816			7.24088	2.21055e-11	22.1055			-7.24248	-1.7516e-11	-17.516			7.24176	1.80882e-11	18.0882			-7.24104	-1.75661e-11	-17.5661
				2.75848	9.87706e-12								7.23888	1.52808e-11	15.2808			7.24	4.07773e-11	40.7773			-7.23928	-1.85544e-11	-18.5544			7.23856	2.34431e-11	23.4431			-7.24016	-1.62488e-11	-16.2488			7.23944	1.79773e-11	17.9773			-7.23872	-1.6616e-11	-16.616
				2.7608	9.34539e-12								7.23656	1.5257e-11	15.257			7.23768	4.00275e-11	40.0275			-7.23696	-1.80143e-11	-18.0143			7.23624	2.4417e-11	24.417			-7.23784	-1.83803e-11	-18.3803			7.23712	1.65313e-11	16.5313			-7.2364	-1.65552e-11	-16.5552
				2.76312	7.26042e-12								7.23424	1.50317e-11	15.0317			7.23536	4.08476e-11	40.8476			-7.23464	-1.55026e-11	-15.5026			7.23392	2.4386e-11	24.386			-7.23552	-1.63263e-11	-16.3263			7.2348	1.72168e-11	17.2168			-7.23408	-1.74839e-11	-17.4839
				2.76544	1.1242e-11								7.23192	1.59722e-11	15.9722			7.23304	4.10431e-11	41.0431			-7.23232	-1.71489e-11	-17.1489			7.2316	2.30556e-11	23.0556			-7.2332	-1.85305e-11	-18.5305			7.23248	1.9291e-11	19.291			-7.23176	-1.66267e-11	-16.6267
				2.76776	1.17248e-11								7.2296	1.41686e-11	14.1686			7.23072	4.10968e-11	41.0968			-7.23	-1.83016e-11	-18.3016			7.22928	2.21795e-11	22.1795			-7.23088	-1.8813e-11	-18.813			7.23016	1.74707e-11	17.4707			-7.22944	-1.82218e-11	-18.2218
				2.77008	9.24525e-12								7.22728	1.33103e-11	13.3103			7.2284	4.28444e-11	42.8444			-7.22768	-1.72836e-11	-17.2836			7.22696	2.18552e-11	21.8552			-7.22856	-1.86235e-11	-18.6235			7.22784	1.64395e-11	16.4395			-7.22712	-1.70201e-11	-17.0201
				2.7724	9.3275e-12								7.22496	1.3029e-11	13.029			7.22608	4.23962e-11	42.3962			-7.22536	-1.72466e-11	-17.2466			7.22464	2.12913e-11	21.2913			-7.22624	-1.72097e-11	-17.2097			7.22552	1.79428e-11	17.9428			-7.2248	-1.88667e-11	-18.8667
				2.77472	7.45353e-12								7.22264	1.4562e-11	14.562			7.22376	4.0223e-11	40.223			-7.22304	-1.59627e-11	-15.9627			7.22232	2.19303e-11	21.9303			-7.22392	-1.65338e-11	-16.5338			7.2232	1.84375e-11	18.4375			-7.22248	-1.84518e-11	-18.4518
				2.77704	8.09011e-12								7.22032	1.23578e-11	12.3578			7.22144	4.16499e-11	41.6499			-7.22072	-1.60283e-11	-16.0283			7.22	2.32333e-11	23.2333			-7.2216	-1.589e-11	-15.89			7.22088	1.77222e-11	17.7222			-7.22016	-1.70714e-11	-17.0714
				2.77936	8.36787e-12								7.218	1.50329e-11	15.0329			7.21912	4.2296e-11	42.296			-7.2184	-1.59997e-11	-15.9997			7.21768	2.41154e-11	24.1154			-7.21928	-1.4599e-11	-14.599			7.21856	1.69855e-11	16.9855			-7.21784	-1.77795e-11	-17.7795
				2.78168	9.29651e-12								7.21568	1.55192e-11	15.5192			7.2168	4.41867e-11	44.1867			-7.21608	-1.5834e-11	-15.834			7.21536	2.18326e-11	21.8326			-7.21696	-1.65934e-11	-16.5934			7.21624	1.75172e-11	17.5172			-7.21552	-1.75172e-11	-17.5172
				2.784	9.84726e-12								7.21336	1.30325e-11	13.0325			7.21448	4.24355e-11	42.4355			-7.21376	-1.67531e-11	-16.7531			7.21304	2.26432e-11	22.6432			-7.21464	-1.68306e-11	-16.8306			7.21392	1.68401e-11	16.8401			-7.2132	-1.61356e-11	-16.1356
				2.78632	8.95319e-12								7.21104	1.52021e-11	15.2021			7.21216	4.26036e-11	42.6036			-7.21144	-1.71656e-11	-17.1656			7.21072	2.16835e-11	21.6835			-7.21232	-1.74159e-11	-17.4159			7.2116	1.71274e-11	17.1274			-7.21088	-1.71358e-11	-17.1358
				2.78864	9.07478e-12								7.20872	1.49494e-11	14.9494			7.20984	4.23437e-11	42.3437			-7.20912	-1.4605e-11	-14.605			7.2084	2.19661e-11	21.9661			-7.21	-1.74588e-11	-17.4588			7.20928	1.52319e-11	15.2319			-7.20856	-1.7671e-11	-17.671
				2.79096	8.62655e-12								7.2064	1.44332e-11	14.4332			7.20752	4.1818e-11	41.818			-7.2068	-1.50138e-11	-15.0138			7.20608	2.2549e-11	22.549			-7.20768	-1.69283e-11	-16.9283			7.20696	1.55669e-11	15.5669			-7.20624	-1.66625e-11	-16.6625
				2.79328	8.5145e-12								7.20408	1.46216e-11	14.6216			7.2052	4.11647e-11	41.1647			-7.20448	-1.56695e-11	-15.6695			7.20376	2.14559e-11	21.4559			-7.20536	-1.75041e-11	-17.5041			7.20464	1.55455e-11	15.5455			-7.20392	-1.80871e-11	-18.0871
				2.7956	7.5334e-12								7.20176	1.39111e-11	13.9111			7.20288	3.92478e-11	39.2478			-7.20216	-1.61344e-11	-16.1344			7.20144	2.26336e-11	22.6336			-7.20304	-1.70428e-11	-17.0428			7.20232	1.61856e-11	16.1856			-7.2016	-1.79178e-11	-17.9178
				2.79792	7.72295e-12								7.19944	1.42926e-11	14.2926			7.20056	4.02826e-11	40.2826			-7.19984	-1.7063e-11	-17.063			7.19912	2.15178e-11	21.5178			-7.20072	-1.8279e-11	-18.279			7.2	1.4618e-11	14.618			-7.19928	-1.89227e-11	-18.9227
				2.80024	8.94961e-12								7.19712	1.57648e-11	15.7648			7.19824	4.05901e-11	40.5901			-7.19752	-1.72347e-11	-17.2347			7.1968	2.29019e-11	22.9019			-7.1984	-1.59449e-11	-15.9449			7.19768	1.51306e-11	15.1306			-7.19696	-1.99741e-11	-19.9741
				2.80256	9.76143e-12								7.1948	1.54108e-11	15.4108			7.19592	4.22936e-11	42.2936			-7.1952	-1.60152e-11	-16.0152			7.19448	2.18087e-11	21.8087			-7.19608	-1.76162e-11	-17.6162			7.19536	1.76686e-11	17.6686			-7.19464	-2.01816e-11	-20.1816
				2.80488	1.05959e-11								7.19248	1.60748e-11	16.0748			7.1936	4.12756e-11	41.2756			-7.19288	-1.52308e-11	-15.2308			7.19216	2.45768e-11	24.5768			-7.19376	-1.54835e-11	-15.4835			7.19304	1.82634e-11	18.2634			-7.19232	-1.85234e-11	-18.5234
				2.8072	1.02728e-11								7.19016	1.41591e-11	14.1591			7.19128	4.13722e-11	41.3722			-7.19056	-1.69522e-11	-16.9522			7.18984	2.46995e-11	24.6995			-7.19144	-1.57923e-11	-15.7923			7.19072	1.94221e-11	19.4221			-7.19	-1.75995e-11	-17.5995
				2.80952	8.76722e-12								7.18784	1.365e-11	13.65			7.18896	4.04531e-11	40.4531			-7.18824	-1.70511e-11	-17.0511			7.18752	2.31629e-11	23.1629			-7.18912	-1.6678e-11	-16.678			7.1884	1.86544e-11	18.6544			-7.18768	-1.75172e-11	-17.5172
				2.81184	1.17105e-11								7.18552	1.37001e-11	13.7001			7.18664	4.03148e-11	40.3148			-7.18592	-1.68747e-11	-16.8747			7.1852	2.22259e-11	22.2259			-7.1868	-1.79667e-11	-17.9667			7.18608	1.65766e-11	16.5766			-7.18536	-1.73742e-11	-17.3742
				2.81416	9.04021e-12								7.1832	1.40446e-11	14.0446			7.18432	4.36407e-11	43.6407			-7.1836	-1.60271e-11	-16.0271			7.18288	2.18826e-11	21.8826			-7.18448	-1.67936e-11	-16.7936			7.18376	1.79165e-11	17.9165			-7.18304	-1.75804e-11	-17.5804
				2.81648	1.09774e-11								7.18088	1.42473e-11	14.2473			7.182	4.25213e-11	42.5213			-7.18128	-1.65588e-11	-16.5588			7.18056	2.06858e-11	20.6858			-7.18216	-1.85722e-11	-18.5722			7.18144	1.60914e-11	16.0914			-7.18072	-1.84387e-11	-18.4387
				2.8188	1.24591e-11								7.17856	1.20479e-11	12.0479			7.17968	4.10729e-11	41.0729			-7.17896	-1.71358e-11	-17.1358			7.17824	2.21294e-11	22.1294			-7.17984	-1.61535e-11	-16.1535			7.17912	1.59067e-11	15.9067			-7.1784	-1.89477e-11	-18.9477
				2.82112	1.01202e-11								7.17624	1.46097e-11	14.6097			7.17736	4.11921e-11	41.1921			-7.17664	-1.68056e-11	-16.8056			7.17592	2.1767e-11	21.767			-7.17752	-1.73158e-11	-17.3158			7.1768	1.87021e-11	18.7021			-7.17608	-1.65922e-11	-16.5922
				2.82344	1.03873e-11								7.17392	1.24615e-11	12.4615			7.17504	4.16177e-11	41.6177			-7.17432	-1.51867e-11	-15.1867			7.1736	2.31343e-11	23.1343			-7.1752	-1.64598e-11	-16.4598			7.17448	1.93816e-11	19.3816			-7.17376	-1.82742e-11	-18.2742
				2.82576	8.32376e-12								7.1716	1.36155e-11	13.6155			7.17272	4.12684e-11	41.2684			-7.172	-1.69641e-11	-16.9641			7.17128	2.18957e-11	21.8957			-7.17288	-1.71477e-11	-17.1477			7.17216	1.89215e-11	18.9215			-7.17144	-1.84435e-11	-18.4435
				2.82808	1.13195e-11								7.16928	1.55371e-11	15.5371			7.1704	4.08047e-11	40.8047			-7.16968	-1.85782e-11	-18.5782			7.16896	2.16466e-11	21.6466			-7.17056	-1.68282e-11	-16.8282			7.16984	1.68222e-11	16.8222			-7.16912	-1.80382e-11	-18.0382
				2.8304	1.09583e-11								7.16696	1.55598e-11	15.5598			7.16808	4.12732e-11	41.2732			-7.16736	-1.73778e-11	-17.3778			7.16664	1.93554e-11	19.3554			-7.16824	-1.77199e-11	-17.7199			7.16752	1.77031e-11	17.7031			-7.1668	-1.65063e-11	-16.5063
				2.83272	1.01274e-11								7.16464	1.25867e-11	12.5867			7.16576	3.95137e-11	39.5137			-7.16504	-1.86819e-11	-18.6819			7.16432	2.20233e-11	22.0233			-7.16592	-1.79261e-11	-17.9261			7.1652	1.78784e-11	17.8784			-7.16448	-1.9216e-11	-19.216
				2.83504	1.14506e-11								7.16232	1.43701e-11	14.3701			7.16344	3.84038e-11	38.4038			-7.16272	-1.71238e-11	-17.1238			7.162	2.14165e-11	21.4165			-7.1636	-1.77163e-11	-17.7163			7.16288	1.74659e-11	17.4659			-7.16216	-1.79261e-11	-17.9261
				2.83736	1.15996e-11								7.16	1.53106e-11	15.3106			7.16112	4.10121e-11	41.0121			-7.1604	-1.61165e-11	-16.1165			7.15968	2.14427e-11	21.4427			-7.16128	-1.68699e-11	-16.8699			7.16056	1.84411e-11	18.4411			-7.15984	-1.90515e-11	-19.0515
				2.83968	1.17677e-11								7.15768	1.62035e-11	16.2035			7.1588	4.10849e-11	41.0849			-7.15808	-1.5226e-11	-15.226			7.15736	2.14427e-11	21.4427			-7.15896	-1.82456e-11	-18.2456			7.15824	1.71464e-11	17.1464			-7.15752	-1.86962e-11	-18.6962
				2.842	1.07676e-11								7.15536	1.42246e-11	14.2246			7.15648	3.89415e-11	38.9415			-7.15576	-1.58292e-11	-15.8292			7.15504	2.204e-11	22.04			-7.15664	-1.72884e-11	-17.2884			7.15592	1.68842e-11	16.8842			-7.1552	-1.87856e-11	-18.7856
				2.84432	9.92236e-12								7.15304	1.522e-11	15.22			7.15416	3.85147e-11	38.5147			-7.15344	-1.6765e-11	-16.765			7.15272	2.21938e-11	22.1938			-7.15432	-1.61511e-11	-16.1511			7.1536	1.81561e-11	18.1561			-7.15288	-1.64598e-11	-16.4598
				2.84664	9.9009e-12								7.15072	1.57672e-11	15.7672			7.15184	3.90297e-11	39.0297			-7.15112	-1.45775e-11	-14.5775			7.1504	2.12282e-11	21.2282			-7.152	-1.77747e-11	-17.7747			7.15128	1.69855e-11	16.9855			-7.15056	-1.64408e-11	-16.4408
				2.84896	1.12253e-11								7.1484	1.6486e-11	16.486			7.14952	4.17226e-11	41.7226			-7.1488	-1.65123e-11	-16.5123			7.14808	2.06917e-11	20.6917			-7.14968	-1.70821e-11	-17.0821			7.14896	1.76829e-11	17.6829			-7.14824	-1.65612e-11	-16.5612
				2.85128	1.0249e-11								7.14608	1.64848e-11	16.4848			7.1472	4.02218e-11	40.2218			-7.14648	-1.73956e-11	-17.3956			7.14576	2.21067e-11	22.1067			-7.14736	-1.58197e-11	-15.8197			7.14664	1.73419e-11	17.3419			-7.14592	-1.76031e-11	-17.6031
				2.8536	8.62059e-12								7.14376	1.41853e-11	14.1853			7.14488	3.76695e-11	37.6695			-7.14416	-1.41579e-11	-14.1579			7.14344	2.04485e-11	20.4485			-7.14504	-1.64515e-11	-16.4515			7.14432	1.61868e-11	16.1868			-7.1436	-1.67114e-11	-16.7114
				2.85592	7.66096e-12								7.14144	1.55168e-11	15.5168			7.14256	3.81297e-11	38.1297			-7.14184	-1.45227e-11	-14.5227			7.14112	2.04831e-11	20.4831			-7.14272	-1.49328e-11	-14.9328			7.142	1.46717e-11	14.6717			-7.14128	-1.63859e-11	-16.3859
				2.85824	1.04314e-11								7.13912	1.45453e-11	14.5453			7.14024	4.18681e-11	41.8681			-7.13952	-1.67412e-11	-16.7412			7.1388	2.15155e-11	21.5155			-7.1404	-1.40554e-11	-14.0554			7.13968	1.68937e-11	16.8937			-7.13896	-1.62596e-11	-16.2596
				2.86056	1.12313e-11								7.1368	1.59567e-11	15.9567			7.13792	4.19157e-11	41.9157			-7.1372	-1.49125e-11	-14.9125			7.13648	2.26623e-11	22.6623			-7.13808	-1.4537e-11	-14.537			7.13736	1.80536e-11	18.0536			-7.13664	-1.80179e-11	-18.0179
				2.86288	9.95931e-12								7.13448	1.36429e-11	13.6429			7.1356	3.95709e-11	39.5709			-7.13488	-1.61106e-11	-16.1106			7.13416	2.14225e-11	21.4225			-7.13576	-1.40935e-11	-14.0935			7.13504	1.52045e-11	15.2045			-7.13432	-1.83422e-11	-18.3422
				2.8652	1.04874e-11								7.13216	1.30373e-11	13.0373			7.13328	3.88843e-11	38.8843			-7.13256	-1.70154e-11	-17.0154			7.13184	2.01183e-11	20.1183			-7.13344	-1.68067e-11	-16.8067			7.13272	1.66243e-11	16.6243			-7.132	-1.81681e-11	-18.1681
				2.86752	1.07783e-11								7.12984	1.20848e-11	12.0848			7.13096	3.89141e-11	38.9141			-7.13024	-1.68568e-11	-16.8568			7.12952	2.08181e-11	20.8181			-7.13112	-1.58364e-11	-15.8364			7.1304	1.57875e-11	15.7875			-7.12968	-1.66041e-11	-16.6041
				2.86984	9.65175e-12								7.12752	1.45012e-11	14.5012			7.12864	4.05651e-11	40.5651			-7.12792	-1.73098e-11	-17.3098			7.1272	2.15238e-11	21.5238			-7.1288	-1.51187e-11	-15.1187			7.12808	1.5772e-11	15.772			-7.12736	-1.61571e-11	-16.1571
				2.87216	1.04767e-11								7.1252	1.50245e-11	15.0245			7.12632	4.12947e-11	41.2947			-7.1256	-1.67746e-11	-16.7746			7.12488	2.2431e-11	22.431			-7.12648	-1.59914e-11	-15.9914			7.12576	1.55383e-11	15.5383			-7.12504	-1.81717e-11	-18.1717
				2.87448	1.00285e-11								7.12288	1.52129e-11	15.2129			7.124	4.11099e-11	41.1099			-7.12328	-1.65898e-11	-16.5898			7.12256	2.30676e-11	23.0676			-7.12416	-1.91218e-11	-19.1218			7.12344	1.75243e-11	17.5243			-7.12272	-1.68711e-11	-16.8711
				2.8768	8.50377e-12								7.12056	1.52963e-11	15.2963			7.12168	4.10074e-11	41.0074			-7.12096	-1.58566e-11	-15.8566			7.12024	2.18743e-11	21.8743			-7.12184	-1.75721e-11	-17.5721			7.12112	1.73861e-11	17.3861			-7.1204	-1.89919e-11	-18.9919
				2.87912	1.05208e-11								7.11824	1.37609e-11	13.7609			7.11936	3.96174e-11	39.6174			-7.11864	-1.7075e-11	-17.075			7.11792	2.31331e-11	23.1331			-7.11952	-1.68771e-11	-16.8771			7.1188	1.64109e-11	16.4109			-7.11808	-1.75268e-11	-17.5268
				2.88144	1.1087e-11								7.11592	1.4413e-11	14.413			7.11704	4.17858e-11	41.7858			-7.11632	-1.69617e-11	-16.9617			7.1156	2.19923e-11	21.9923			-7.1172	-1.74648e-11	-17.4648			7.11648	1.7181e-11	17.181			-7.11576	-1.52558e-11	-15.2558
				2.88376	1.27166e-11								7.1136	1.3743e-11	13.743			7.11472	4.05878e-11	40.5878			-7.114	-1.63299e-11	-16.3299			7.11328	2.03532e-11	20.3532			-7.11488	-1.65624e-11	-16.5624			7.11416	1.85674e-11	18.5674			-7.11344	-1.73587e-11	-17.3587
				2.88608	1.1509e-11								7.11128	1.51127e-11	15.1127			7.1124	3.97068e-11	39.7068			-7.11168	-1.8819e-11	-18.819			7.11096	2.22999e-11	22.2999			-7.11256	-1.68377e-11	-16.8377			7.11184	1.85567e-11	18.5567			-7.11112	-1.54215e-11	-15.4215
				2.8884	1.07568e-11								7.10896	1.46371e-11	14.6371			7.11008	4.03756e-11	40.3756			-7.10936	-1.61857e-11	-16.1857			7.10864	2.25383e-11	22.5383			-7.11024	-1.54156e-11	-15.4156			7.10952	1.65468e-11	16.5468			-7.1088	-1.78927e-11	-17.8927
				2.89072	1.03157e-11								7.10664	1.42163e-11	14.2163			7.10776	4.05758e-11	40.5758			-7.10704	-1.73241e-11	-17.3241			7.10632	2.36541e-11	23.6541			-7.10792	-1.73122e-11	-17.3122			7.1072	1.7063e-11	17.063			-7.10648	-1.77163e-11	-17.7163
				2.89304	1.00416e-11								7.10432	1.43558e-11	14.3558			7.10544	4.03136e-11	40.3136			-7.10472	-1.66613e-11	-16.6613			7.104	2.10935e-11	21.0935			-7.1056	-1.72895e-11	-17.2895			7.10488	1.66648e-11	16.6648			-7.10416	-1.69736e-11	-16.9736
				2.89536	1.25211e-11								7.102	1.35106e-11	13.5106			7.10312	3.93921e-11	39.3921			-7.1024	-1.66744e-11	-16.6744			7.10168	2.25812e-11	22.5812			-7.10328	-1.6281e-11	-16.281			7.10256	1.74099e-11	17.4099			-7.10184	-1.72574e-11	-17.2574
				2.89768	7.36532e-12								7.09968	1.3135e-11	13.135			7.1008	3.92157e-11	39.2157			-7.10008	-1.5288e-11	-15.288			7.09936	2.28017e-11	22.8017			-7.10096	-1.62858e-11	-16.2858			7.10024	1.67304e-11	16.7304			-7.09952	-1.72097e-11	-17.2097
				2.9	1.02955e-11								7.09736	1.54048e-11	15.4048			7.09848	3.95399e-11	39.5399			-7.09776	-1.52356e-11	-15.2356			7.09704	2.21187e-11	22.1187			-7.09864	-1.54203e-11	-15.4203			7.09792	1.80608e-11	18.0608			-7.0972	-1.95819e-11	-19.5819
				2.90232	1.09178e-11								7.09504	1.54775e-11	15.4775			7.09616	3.9708e-11	39.708			-7.09544	-1.76031e-11	-17.6031			7.09472	2.24739e-11	22.4739			-7.09632	-1.47802e-11	-14.7802			7.0956	1.82694e-11	18.2694			-7.09488	-1.76996e-11	-17.6996
				2.90464	1.36322e-11								7.09272	1.62476e-11	16.2476			7.09384	4.19086e-11	41.9086			-7.09312	-1.66959e-11	-16.6959			7.0924	2.15739e-11	21.5739			-7.094	-1.48148e-11	-14.8148			7.09328	1.73908e-11	17.3908			-7.09256	-1.67257e-11	-16.7257
				2.90696	1.33508e-11								7.0904	1.48421e-11	14.8421			7.09152	4.09704e-11	40.9704			-7.0908	-1.61606e-11	-16.1606			7.09008	2.28363e-11	22.8363			-7.09168	-1.59818e-11	-15.9818			7.09096	1.74671e-11	17.4671			-7.09024	-1.48911e-11	-14.8911
				2.90928	1.1422e-11								7.08808	1.35702e-11	13.5702			7.0892	3.81738e-11	38.1738			-7.08848	-1.62524e-11	-16.2524			7.08776	2.16454e-11	21.6454			-7.08936	-1.65135e-11	-16.5135			7.08864	1.75959e-11	17.5959			-7.08792	-1.59425e-11	-15.9425
				2.9116	1.09666e-11								7.08576	1.48684e-11	14.8684			7.08688	3.85266e-11	38.5266			-7.08616	-1.53715e-11	-15.3715			7.08544	2.2338e-11	22.338			-7.08704	-1.43618e-11	-14.3618			7.08632	1.80107e-11	18.0107			-7.0856	-1.90753e-11	-19.0753
				2.91392	1.03348e-11								7.08344	1.47468e-11	14.7468			7.08456	3.72475e-11	37.2475			-7.08384	-1.584e-11	-15.84			7.08312	2.26456e-11	22.6456			-7.08472	-1.60605e-11	-16.0605			7.084	1.54513e-11	15.4513			-7.08328	-1.65469e-11	-16.5469
				2.91624	9.90805e-12								7.08112	1.53964e-11	15.3964			7.08224	3.79842e-11	37.9842			-7.08152	-1.84948e-11	-18.4948			7.0808	2.23785e-11	22.3785			-7.0824	-1.44691e-11	-14.4691			7.08168	1.58959e-11	15.8959			-7.08096	-1.82814e-11	-18.2814
				2.91856	1.10298e-11								7.0788	1.50102e-11	15.0102			7.07992	3.90213e-11	39.0213			-7.0792	-1.64169e-11	-16.4169			7.07848	2.25454e-11	22.5454			-7.08008	-1.53929e-11	-15.3929			7.07936	1.60604e-11	16.0604			-7.07864	-1.84697e-11	-18.4697
				2.92088	8.91504e-12								7.07648	1.41078e-11	14.1078			7.0776	3.81011e-11	38.1011			-7.07688	-1.59031e-11	-15.9031			7.07616	2.21711e-11	22.1711			-7.07776	-1.55157e-11	-15.5157			7.07704	1.70785e-11	17.0785			-7.07632	-1.92458e-11	-19.2458
				2.9232	1.03646e-11								7.07416	1.20479e-11	12.0479			7.07528	3.86566e-11	38.6566			-7.07456	-1.55467e-11	-15.5467			7.07384	2.04318e-11	20.4318			-7.07544	-1.56611e-11	-15.6611			7.07472	1.81168e-11	18.1168			-7.074	-1.82504e-11	-18.2504
				2.92552	1.01727e-11								7.07184	1.3054e-11	13.054			7.07296	3.88676e-11	38.8676			-7.07224	-1.7187e-11	-17.187			7.07152	2.12806e-11	21.2806			-7.07312	-1.5263e-11	-15.263			7.0724	1.70463e-11	17.0463			-7.07168	-1.57053e-11	-15.7053
				2.92784	1.16211e-11								7.06952	1.41114e-11	14.1114			7.07064	3.85791e-11	38.5791			-7.06992	-1.70285e-11	-17.0285			7.0692	2.18898e-11	21.8898			-7.0708	-1.39016e-11	-13.9016			7.07008	1.70666e-11	17.0666			-7.06936	-1.68878e-11	-16.8878
				2.93016	9.36804e-12								7.0672	1.59734e-11	15.9734			7.06832	3.78436e-11	37.8436			-7.0676	-1.88214e-11	-18.8214			7.06688	2.00182e-11	20.0182			-7.06848	-1.65421e-11	-16.5421			7.06776	1.70606e-11	17.0606			-7.06704	-1.58578e-11	-15.8578
				2.93248	9.63149e-12								7.06488	1.3054e-11	13.054			7.066	3.93182e-11	39.3182			-7.06528	-1.9185e-11	-19.185			7.06456	2.0501e-11	20.501			-7.06616	-1.80453e-11	-18.0453			7.06544	1.60473e-11	16.0473			-7.06472	-1.69224e-11	-16.9224
				2.9348	1.13278e-11								7.06256	1.3451e-11	13.451			7.06368	3.85791e-11	38.5791			-7.06296	-1.66756e-11	-16.6756			7.06224	2.15083e-11	21.5083			-7.06384	-1.58686e-11	-15.8686			7.06312	1.57183e-11	15.7183			-7.0624	-1.85341e-11	-18.5341
				2.93712	1.00142e-11								7.06024	1.46121e-11	14.6121			7.06136	3.86983e-11	38.6983			-7.06064	-1.72919e-11	-17.2919			7.05992	2.23857e-11	22.3857			-7.06152	-1.45322e-11	-14.5322			7.0608	1.76757e-11	17.6757			-7.06008	-1.59484e-11	-15.9484
				2.93944	1.12766e-11								7.05792	1.52486e-11	15.2486			7.05904	4.01658e-11	40.1658			-7.05832	-1.87284e-11	-18.7284			7.0576	2.07132e-11	20.7132			-7.0592	-1.7193e-11	-17.193			7.05848	1.73753e-11	17.3753			-7.05776	-1.53357e-11	-15.3357
				2.94176	1.10119e-11								7.0556	1.28084e-11	12.8084			7.05672	3.8659e-11	38.659			-7.056	-1.68854e-11	-16.8854			7.05528	2.06333e-11	20.6333			-7.05688	-1.62286e-11	-16.2286			7.05616	1.69891e-11	16.9891			-7.05544	-1.8875e-11	-18.875
				2.94408	1.06686e-11								7.05328	1.28513e-11	12.8513			7.0544	3.89915e-11	38.9915			-7.05368	-1.57768e-11	-15.7768			7.05296	2.12615e-11	21.2615			-7.05456	-1.6101e-11	-16.101			7.05384	1.63871e-11	16.3871			-7.05312	-1.90348e-11	-19.0348
				2.9464	1.16008e-11								7.05096	1.16688e-11	11.6688			7.05208	3.91394e-11	39.1394			-7.05136	-1.61726e-11	-16.1726			7.05064	2.01362e-11	20.1362			-7.05224	-1.63847e-11	-16.3847			7.05152	1.95366e-11	19.5366			-7.0508	-1.98859e-11	-19.8859
				2.94872	1.20789e-11								7.04864	1.20705e-11	12.0705			7.04976	3.77756e-11	37.7756			-7.04904	-1.75435e-11	-17.5435			7.04832	2.10362e-11	21.0362			-7.04992	-1.59115e-11	-15.9115			7.0492	1.75243e-11	17.5243			-7.04848	-1.82563e-11	-18.2563
				2.95104	1.01596e-11								7.04632	1.55109e-11	15.5109			7.04744	3.66491e-11	36.6491			-7.04672	-1.7125e-11	-17.125			7.046	2.03579e-11	20.3579			-7.0476	-1.56099e-11	-15.6099			7.04688	1.59627e-11	15.9627			-7.04616	-1.62751e-11	-16.2751
				2.95336	9.5087e-12								7.044	1.43307e-11	14.3307			7.04512	3.98618e-11	39.8618			-7.0444	-1.56266e-11	-15.6266			7.04368	2.17443e-11	21.7443			-7.04528	-1.69844e-11	-16.9844			7.04456	1.59639e-11	15.9639			-7.04384	-1.55074e-11	-15.5074
				2.95568	9.75547e-12								7.04168	1.45334e-11	14.5334			7.0428	3.93945e-11	39.3945			-7.04208	-1.46455e-11	-14.6455			7.04136	2.09814e-11	20.9814			-7.04296	-1.57017e-11	-15.7017			7.04224	1.56873e-11	15.6873			-7.04152	-1.66363e-11	-16.6363
				2.958	8.70881e-12								7.03936	1.47611e-11	14.7611			7.04048	3.93694e-11	39.3694			-7.03976	-1.71787e-11	-17.1787			7.03904	2.24644e-11	22.4644			-7.04064	-1.746e-11	-17.46			7.03992	1.77151e-11	17.7151			-7.0392	-1.57243e-11	-15.7243
				2.96032	1.20574e-11								7.03704	1.02621e-11	10.2621			7.03816	3.83752e-11	38.3752			-7.03744	-1.59318e-11	-15.9318			7.03672	2.42227e-11	24.2227			-7.03832	-1.60021e-11	-16.0021			7.0376	1.60628e-11	16.0628			-7.03688	-1.63883e-11	-16.3883
				2.96264	1.27274e-11								7.03472	1.31196e-11	13.1196			7.03584	3.92002e-11	39.2002			-7.03512	-1.56671e-11	-15.6671			7.0344	2.26325e-11	22.6325			-7.036	-1.43546e-11	-14.3546			7.03528	1.54549e-11	15.4549			-7.03456	-1.74791e-11	-17.4791
				2.96496	1.26487e-11								7.0324	1.50877e-11	15.0877			7.03352	3.84229e-11	38.4229			-7.0328	-1.7429e-11	-17.429			7.03208	2.02268e-11	20.2268			-7.03368	-1.39517e-11	-13.9517			7.03296	1.46049e-11	14.6049			-7.03224	-1.80835e-11	-18.0835
				2.96728	1.11574e-11								7.03008	1.38813e-11	13.8813			7.0312	3.81785e-11	38.1785			-7.03048	-1.74254e-11	-17.4254			7.02976	2.14082e-11	21.4082			-7.03136	-1.45859e-11	-14.5859			7.03064	1.5282e-11	15.282			-7.02992	-1.68985e-11	-16.8985
				2.9696	1.18035e-11								7.02776	1.63072e-11	16.3072			7.02888	3.84229e-11	38.4229			-7.02816	-1.53667e-11	-15.3667			7.02744	2.0954e-11	20.954			-7.02904	-1.73527e-11	-17.3527			7.02832	1.66434e-11	16.6434			-7.0276	-1.73432e-11	-17.3432
				2.97192	1.21695e-11								7.02544	1.50066e-11	15.0066			7.02656	3.60709e-11	36.0709			-7.02584	-1.59627e-11	-15.9627			7.02512	2.2251e-11	22.251			-7.02672	-1.68628e-11	-16.8628			7.026	1.67805e-11	16.7805			-7.02528	-1.76901e-11	-17.6901
				2.97424	1.13851e-11								7.02312	1.5673e-11	15.673			7.02424	3.88592e-11	38.8592			-7.02352	-1.47301e-11	-14.7301			7.0228	2.19065e-11	21.9065			-7.0244	-1.63454e-11	-16.3454			7.02368	1.6523e-11	16.523			-7.02296	-1.65063e-11	-16.5063
				2.97656	1.06626e-11								7.0208	1.54561e-11	15.4561			7.02192	3.83883e-11	38.3883			-7.0212	-1.53774e-11	-15.3774			7.02048	2.12127e-11	21.2127			-7.02208	-1.517e-11	-15.17			7.02136	1.66565e-11	16.6565			-7.02064	-1.65051e-11	-16.5051
				2.97888	9.84964e-12								7.01848	1.31768e-11	13.1768			7.0196	3.8523e-11	38.523			-7.01888	-1.69939e-11	-16.9939			7.01816	2.0191e-11	20.191			-7.01976	-1.64455e-11	-16.4455			7.01904	1.69676e-11	16.9676			-7.01832	-1.68091e-11	-16.8091
				2.9812	1.15674e-11								7.01616	1.44893e-11	14.4893			7.01728	3.78984e-11	37.8984			-7.01656	-1.58626e-11	-15.8626			7.01584	2.03961e-11	20.3961			-7.01744	-1.48386e-11	-14.8386			7.01672	1.6213e-11	16.213			-7.016	-1.68628e-11	-16.8628
				2.98352	1.20181e-11								7.01384	1.39302e-11	13.9302			7.01496	3.97902e-11	39.7902			-7.01424	-1.61666e-11	-16.1666			7.01352	2.03448e-11	20.3448			-7.01512	-1.55884e-11	-15.5884			7.0144	1.61129e-11	16.1129			-7.01368	-1.69462e-11	-16.9462
				2.98584	1.17832e-11								7.01152	1.30158e-11	13.0158			7.01264	3.97092e-11	39.7092			-7.01192	-1.49042e-11	-14.9042			7.0112	2.23464e-11	22.3464			-7.0128	-1.54144e-11	-15.4144			7.01208	1.52093e-11	15.2093			-7.01136	-1.67531e-11	-16.7531
				2.98816	9.82222e-12								7.0092	1.45644e-11	14.5644			7.01032	3.72761e-11	37.2761			-7.0096	-1.46204e-11	-14.6204			7.00888	2.14499e-11	21.4499			-7.01048	-1.47552e-11	-14.7552			7.00976	1.64634e-11	16.4634			-7.00904	-1.7286e-11	-17.286
				2.99048	1.28585e-11								7.00688	1.47778e-11	14.7778			7.008	3.67576e-11	36.7576			-7.00728	-1.54513e-11	-15.4513			7.00656	2.21723e-11	22.1723			-7.00816	-1.51795e-11	-15.1795			7.00744	1.54954e-11	15.4954			-7.00672	-1.7007e-11	-17.007
				2.9928	1.18011e-11								7.00456	1.40387e-11	14.0387			7.00568	3.87424e-11	38.7424			-7.00496	-1.56695e-11	-15.6695			7.00424	2.18004e-11	21.8004			-7.00584	-1.51152e-11	-15.1152			7.00512	1.65683e-11	16.5683			-7.0044	-1.59794e-11	-15.9794
				2.99512	1.23435e-11								7.00224	1.43951e-11	14.3951			7.00336	3.85362e-11	38.5362			-7.00264	-1.39457e-11	-13.9457			7.00192	2.15906e-11	21.5906			-7.00352	-1.57243e-11	-15.7243			7.0028	1.78176e-11	17.8176			-7.00208	-1.7156e-11	-17.156
				2.99744	1.28227e-11								6.99992	1.2657e-11	12.657			7.00104	3.8808e-11	38.808			-7.00032	-1.43653e-11	-14.3653			6.9996	2.11841e-11	21.1841			-7.0012	-1.64086e-11	-16.4086			7.00048	1.58602e-11	15.8602			-6.99976	-1.78701e-11	-17.8701
				2.99976	1.20133e-11								6.9976	1.28716e-11	12.8716			6.99872	3.60745e-11	36.0745			-6.998	-1.64205e-11	-16.4205			6.99728	2.11018e-11	21.1018			-6.99888	-1.6287e-11	-16.287			6.99816	1.6275e-11	16.275			-6.99744	-1.71191e-11	-17.1191
				3.00208	1.22148e-11								6.99528	1.47456e-11	14.7456			6.9964	3.61782e-11	36.1782			-6.99568	-1.56039e-11	-15.6039			6.99496	2.12019e-11	21.2019			-6.99656	-1.49364e-11	-14.9364			6.99584	1.62834e-11	16.2834			-6.99512	-1.70785e-11	-17.0785
				3.0044	9.76619e-12								6.99296	1.46383e-11	14.6383			6.99408	3.85421e-11	38.5421			-6.99336	-1.56468e-11	-15.6468			6.99264	2.10505e-11	21.0505			-6.99424	-1.64551e-11	-16.4551			6.99352	1.72597e-11	17.2597			-6.9928	-1.77044e-11	-17.7044
				3.00672	1.16783e-11								6.99064	1.52331e-11	15.2331			6.99176	3.69614e-11	36.9614			-6.99104	-1.5449e-11	-15.449			6.99032	2.05391e-11	20.5391			-6.99192	-1.5381e-11	-15.381			6.9912	1.62118e-11	16.2118			-6.99048	-1.46681e-11	-14.6681
				3.00904	1.11884e-11								6.98832	1.41936e-11	14.1936			6.98944	3.64834e-11	36.4834			-6.98872	-1.54001e-11	-15.4001			6.988	2.20948e-11	22.0948			-6.9896	-1.51819e-11	-15.1819			6.98888	1.41006e-11	14.1006			-6.98816	-1.78331e-11	-17.8331
				3.01136	1.27107e-11								6.986	1.45274e-11	14.5274			6.98712	3.74526e-11	37.4526			-6.9864	-1.59866e-11	-15.9866			6.98568	2.20459e-11	22.0459			-6.98728	-1.77044e-11	-17.7044			6.98656	1.58304e-11	15.8304			-6.98584	-1.78355e-11	-17.8355
				3.01368	1.3594e-11								6.98368	1.51807e-11	15.1807			6.9848	3.80307e-11	38.0307			-6.98408	-1.56528e-11	-15.6528			6.98336	2.20698e-11	22.0698			-6.98496	-1.78164e-11	-17.8164			6.98424	1.84208e-11	18.4208			-6.98352	-1.5797e-11	-15.797
				3.016	1.35749e-11								6.98136	1.48493e-11	14.8493			6.98248	3.6022e-11	36.022			-6.98176	-1.64432e-11	-16.4432			6.98104	2.08956e-11	20.8956			-6.98264	-1.63907e-11	-16.3907			6.98192	1.56313e-11	15.6313			-6.9812	-1.57208e-11	-15.7208
				3.01832	1.29002e-11								6.97904	1.42938e-11	14.2938			6.98016	3.80498e-11	38.0498			-6.97944	-1.75423e-11	-17.5423			6.97872	2.01219e-11	20.1219			-6.98032	-1.67662e-11	-16.7662			6.9796	1.39647e-11	13.9647			-6.97888	-1.59413e-11	-15.9413
				3.02064	1.33222e-11								6.97672	1.10763e-11	11.0763			6.97784	3.83025e-11	38.3025			-6.97712	-1.48303e-11	-14.8303			6.9764	2.11233e-11	21.1233			-6.978	-1.37943e-11	-13.7943			6.97728	1.44928e-11	14.4928			-6.97656	-1.82551e-11	-18.2551
				3.02296	1.22362e-11								6.9744	1.27369e-11	12.7369			6.97552	3.87805e-11	38.7805			-6.9748	-1.62584e-11	-16.2584			6.97408	2.19744e-11	21.9744			-6.97568	-1.39219e-11	-13.9219			6.97496	1.58804e-11	15.8804			-6.97424	-1.84125e-11	-18.4125
				3.02528	1.09941e-11								6.97208	1.33103e-11	13.3103			6.9732	3.82596e-11	38.2596			-6.97248	-1.4711e-11	-14.711			6.97176	2.09194e-11	20.9194			-6.97336	-1.78665e-11	-17.8665			6.97264	1.57934e-11	15.7934			-6.97192	-1.68878e-11	-16.8878
				3.0276	1.20336e-11								6.96976	1.34617e-11	13.4617			6.97088	3.64154e-11	36.4154			-6.97016	-1.47754e-11	-14.7754			6.96944	2.04903e-11	20.4903			-6.97104	-1.37705e-11	-13.7705			6.97032	1.46156e-11	14.6156			-6.9696	-1.6262e-11	-16.262
				3.02992	1.47384e-11								6.96744	1.41543e-11	14.1543			6.96856	3.78448e-11	37.8448			-6.96784	-1.62357e-11	-16.2357			6.96712	1.9899e-11	19.899			-6.96872	-1.53655e-11	-15.3655			6.968	1.64467e-11	16.4467			-6.96728	-1.8037e-11	-18.037
				3.03224	1.18822e-11								6.96512	1.40673e-11	14.0673			6.96624	3.67421e-11	36.7421			-6.96552	-1.53429e-11	-15.3429			6.9648	2.10303e-11	21.0303			-6.9664	-1.73801e-11	-17.3801			6.96568	1.45465e-11	14.5465			-6.96496	-1.69665e-11	-16.9665
				3.03456	8.52165e-12								6.9628	1.48087e-11	14.8087			6.96392	3.63594e-11	36.3594			-6.9632	-1.71298e-11	-17.1298			6.96248	2.08884e-11	20.8884			-6.96408	-1.82575e-11	-18.2575			6.96336	1.62297e-11	16.2297			-6.96264	-1.75077e-11	-17.5077
				3.03688	1.24484e-11								6.96048	1.27107e-11	12.7107			6.9616	3.79306e-11	37.9306			-6.96088	-1.66744e-11	-16.6744			6.96016	2.27505e-11	22.7505			-6.96176	-1.76686e-11	-17.6686			6.96104	1.51425e-11	15.1425			-6.96032	-1.72478e-11	-17.2478
				3.0392	1.28764e-11								6.95816	1.16473e-11	11.6473			6.95928	3.81726e-11	38.1726			-6.95856	-1.66577e-11	-16.6577			6.95784	1.97631e-11	19.7631			-6.95944	-1.65898e-11	-16.5898			6.95872	1.63024e-11	16.3024			-6.958	-1.6076e-11	-16.076
				3.04152	1.44857e-11								6.95584	1.28978e-11	12.8978			6.95696	3.76457e-11	37.6457			-6.95624	-1.59425e-11	-15.9425			6.95552	1.83278e-11	18.3278			-6.95712	-1.52201e-11	-15.2201			6.9564	1.66601e-11	16.6601			-6.95568	-1.76519e-11	-17.6519
				3.04384	9.72805e-12								6.95352	1.38384e-11	13.8384			6.95464	3.86792e-11	38.6792			-6.95392	-1.55849e-11	-15.5849			6.9532	2.11781e-11	21.1781			-6.9548	-1.58733e-11	-15.8733			6.95408	1.49387e-11	14.9387			-6.95336	-1.83493e-11	-18.3493
				3.04616	1.02693e-11								6.9512	1.2967e-11	12.967			6.95232	3.85564e-11	38.5564			-6.9516	-1.53286e-11	-15.3286			6.95088	2.0644e-11	20.644			-6.95248	-1.75864e-11	-17.5864			6.95176	1.56527e-11	15.6527			-6.95104	-1.76353e-11	-17.6353
				3.04848	1.09511e-11								6.94888	1.09976e-11	10.9976			6.95	3.75908e-11	37.5908			-6.94928	-1.54716e-11	-15.4716			6.94856	2.14785e-11	21.4785			-6.95016	-1.58519e-11	-15.8519			6.94944	1.51282e-11	15.1282			-6.94872	-1.76198e-11	-17.6198
				3.0508	1.1608e-11								6.94656	1.46419e-11	14.6419			6.94768	3.64011e-11	36.4011			-6.94696	-1.5648e-11	-15.648			6.94624	1.87474e-11	18.7474			-6.94784	-1.63359e-11	-16.3359			6.94712	1.74516e-11	17.4516			-6.9464	-1.75625e-11	-17.5625
				3.05312	1.27345e-11								6.94424	1.19573e-11	11.9573			6.94536	3.56489e-11	35.6489			-6.94464	-1.6262e-11	-16.262			6.94392	2.05081e-11	20.5081			-6.94552	-1.59854e-11	-15.9854			6.9448	1.535e-11	15.35			-6.94408	-1.78117e-11	-17.8117
				3.05544	1.29932e-11								6.94192	1.3712e-11	13.712			6.94304	3.52674e-11	35.2674			-6.94232	-1.45728e-11	-14.5728			6.9416	2.17753e-11	21.7753			-6.9432	-1.60784e-11	-16.0784			6.94248	1.55538e-11	15.5538			-6.94176	-1.74409e-11	-17.4409
				3.05776	1.2688e-11								6.9396	1.43772e-11	14.3772			6.94072	3.5488e-11	35.488			-6.94	-1.31673e-11	-13.1673			6.93928	2.15846e-11	21.5846			-6.94088	-1.51724e-11	-15.1724			6.94016	1.52474e-11	15.2474			-6.93944	-1.7801e-11	-17.801
				3.06008	1.17522e-11								6.93728	1.37216e-11	13.7216			6.9384	3.6425e-11	36.425			-6.93768	-1.25093e-11	-12.5093			6.93696	2.09027e-11	20.9027			-6.93856	-1.65028e-11	-16.5028			6.93784	1.59186e-11	15.9186			-6.93712	-1.70642e-11	-17.0642
				3.0624	1.25664e-11								6.93496	1.29431e-11	12.9431			6.93608	3.67671e-11	36.7671			-6.93536	-1.48577e-11	-14.8577			6.93464	2.07203e-11	20.7203			-6.93624	-1.50484e-11	-15.0484			6.93552	1.66148e-11	16.6148			-6.9348	-1.43224e-11	-14.3224
				3.06472	1.26165e-11								6.93264	1.21146e-11	12.1146			6.93376	3.78591e-11	37.8591			-6.93304	-1.70845e-11	-17.0845			6.93232	2.07406e-11	20.7406			-6.93392	-1.54382e-11	-15.4382			6.9332	1.49959e-11	14.9959			-6.93248	-1.58948e-11	-15.8948
				3.06704	1.19561e-11								6.93032	1.18547e-11	11.8547			6.93144	3.67909e-11	36.7909			-6.93072	-1.55634e-11	-15.5634			6.93	2.12973e-11	21.2973			-6.9316	-1.66995e-11	-16.6995			6.93088	1.52427e-11	15.2427			-6.93016	-1.73563e-11	-17.3563
				3.06936	9.86991e-12								6.928	1.23244e-11	12.3244			6.92912	3.60888e-11	36.0888			-6.9284	-1.45036e-11	-14.5036			6.92768	1.83385e-11	18.3385			-6.92928	-1.56802e-11	-15.6802			6.92856	1.5493e-11	15.493			-6.92784	-1.72895e-11	-17.2895
				3.07168	1.04671e-11								6.92568	1.5226e-11	15.226			6.9268	3.77065e-11	37.7065			-6.92608	-1.4692e-11	-14.692			6.92536	1.97082e-11	19.7082			-6.92696	-1.66887e-11	-16.6887			6.92624	1.61272e-11	16.1272			-6.92552	-1.76782e-11	-17.6782
				3.074	1.27953e-11								6.92336	1.62917e-11	16.2917			6.92448	3.76433e-11	37.6433			-6.92376	-1.65695e-11	-16.5695			6.92304	2.17443e-11	21.7443			-6.92464	-1.46514e-11	-14.6514			6.92392	1.63024e-11	16.3024			-6.9232	-1.57231e-11	-15.7231
				3.07632	1.32185e-11								6.92104	1.53619e-11	15.3619			6.92216	3.59159e-11	35.9159			-6.92144	-1.58173e-11	-15.8173			6.92072	2.132e-11	21.32			-6.92232	-1.52761e-11	-15.2761			6.9216	1.65385e-11	16.5385			-6.92088	-1.73825e-11	-17.3825
				3.07864	1.1968e-11								6.91872	1.45632e-11	14.5632			6.91984	3.67039e-11	36.7039			-6.91912	-1.75458e-11	-17.5458			6.9184	2.13688e-11	21.3688			-6.92	-1.44464e-11	-14.4464			6.91928	1.59448e-11	15.9448			-6.91856	-1.54573e-11	-15.4573
				3.08096	1.24913e-11								6.9164	1.36322e-11	13.6322			6.91752	3.8659e-11	38.659			-6.9168	-1.47325e-11	-14.7325			6.91608	2.05463e-11	20.5463			-6.91768	-1.68377e-11	-16.8377			6.91696	1.56539e-11	15.6539			-6.91624	-1.49232e-11	-14.9232
				3.08328	1.24305e-11								6.91408	1.28025e-11	12.8025			6.9152	3.70115e-11	37.0115			-6.91448	-1.38229e-11	-13.8229			6.91376	2.11423e-11	21.1423			-6.91536	-1.41222e-11	-14.1222			6.91464	1.55979e-11	15.5979			-6.91392	-1.6138e-11	-16.138
				3.0856	1.1155e-11								6.91176	1.16282e-11	11.6282			6.91288	3.59148e-11	35.9148			-6.91216	-1.44106e-11	-14.4106			6.91144	2.14964e-11	21.4964			-6.91304	-1.63657e-11	-16.3657			6.91232	1.35821e-11	13.5821			-6.9116	-1.92124e-11	-19.2124
				3.08792	1.03861e-11								6.90944	1.24389e-11	12.4389			6.91056	3.60304e-11	36.0304			-6.90984	-1.38992e-11	-13.8992			6.90912	1.99252e-11	19.9252			-6.91072	-1.55956e-11	-15.5956			6.91	1.81657e-11	18.1657			-6.90928	-1.63383e-11	-16.3383
				3.09024	1.11085e-11								6.90712	1.32674e-11	13.2674			6.90824	3.766e-11	37.66			-6.90752	-1.44094e-11	-14.4094			6.9068	2.03281e-11	20.3281			-6.9084	-1.7255e-11	-17.255			6.90768	1.68901e-11	16.8901			-6.90696	-1.65528e-11	-16.5528
				3.09256	1.22434e-11								6.9048	1.15937e-11	11.5937			6.90592	3.76111e-11	37.6111			-6.9052	-1.47134e-11	-14.7134			6.90448	2.06715e-11	20.6715			-6.90608	-1.63764e-11	-16.3764			6.90536	1.31553e-11	13.1553			-6.90464	-1.63323e-11	-16.3323
				3.09488	1.05661e-11								6.90248	1.22827e-11	12.2827			6.9036	3.51888e-11	35.1888			-6.90288	-1.42938e-11	-14.2938			6.90216	2.02316e-11	20.2316			-6.90376	-1.53786e-11	-15.3786			6.90304	1.47062e-11	14.7062			-6.90232	-1.6225e-11	-16.225
				3.0972	1.23542e-11								6.90016	1.2924e-11	12.924			6.90128	3.59136e-11	35.9136			-6.90056	-1.41007e-11	-14.1007			6.89984	2.07287e-11	20.7287			-6.90144	-1.31792e-11	-13.1792			6.90072	1.41614e-11	14.1614			-6.9	-1.62298e-11	-16.2298
				3.09952	1.36143e-11								6.89784	1.42115e-11	14.2115			6.89896	3.82203e-11	38.2203			-6.89824	-1.69057e-11	-16.9057			6.89752	1.91527e-11	19.1527			-6.89912	-1.36787e-11	-13.6787			6.8984	1.56003e-11	15.6003			-6.89768	-1.83624e-11	-18.3624
				3.10184	1.21492e-11								6.89552	1.59663e-11	15.9663			6.89664	3.75884e-11	37.5884			-6.89592	-1.5921e-11	-15.921			6.8952	1.95271e-11	19.5271			-6.8968	-1.56492e-11	-15.6492			6.89608	1.54298e-11	15.4298			-6.89536	-1.88619e-11	-18.8619
				3.10416	1.36012e-11								6.8932	1.36035e-11	13.6035			6.89432	3.49396e-11	34.9396			-6.8936	-1.46634e-11	-14.6634			6.89288	1.88762e-11	18.8762			-6.89448	-1.47671e-11	-14.7671			6.89376	1.53511e-11	15.3511			-6.89304	-1.59663e-11	-15.9663
				3.10648	1.40804e-11								6.89088	1.18595e-11	11.8595			6.892	3.62104e-11	36.2104			-6.89128	-1.49995e-11	-14.9995			6.89056	2.02363e-11	20.2363			-6.89216	-1.535e-11	-15.35			6.89144	1.57803e-11	15.7803			-6.89072	-1.78737e-11	-17.8737
				3.1088	1.30075e-11								6.88856	1.1943e-11	11.943			6.88968	3.60042e-11	36.0042			-6.88896	-1.54442e-11	-15.4442			6.88824	2.01946e-11	20.1946			-6.88984	-1.25677e-11	-12.5677			6.88912	1.69819e-11	16.9819			-6.8884	-1.62846e-11	-16.2846
				3.11112	1.26046e-11								6.88624	1.20789e-11	12.0789			6.88736	3.45415e-11	34.5415			-6.88664	-1.51068e-11	-15.1068			6.88592	2.16812e-11	21.6812			-6.88752	-1.34594e-11	-13.4594			6.8868	1.62285e-11	16.2285			-6.88608	-1.71274e-11	-17.1274
				3.11344	1.19394e-11								6.88392	1.38849e-11	13.8849			6.88504	3.49563e-11	34.9563			-6.88432	-1.38122e-11	-13.8122			6.8836	2.13474e-11	21.3474			-6.8852	-1.40077e-11	-14.0077			6.88448	1.54572e-11	15.4572			-6.88376	-1.66554e-11	-16.6554
				3.11576	1.31935e-11								6.8816	1.3147e-11	13.147			6.88272	3.49849e-11	34.9849			-6.882	-1.59198e-11	-15.9198			6.88128	2.08634e-11	20.8634			-6.88288	-1.46431e-11	-14.6431			6.88216	1.58912e-11	15.8912			-6.88144	-1.61821e-11	-16.1821
				3.11808	1.36298e-11								6.87928	1.50531e-11	15.0531			6.8804	3.46309e-11	34.6309			-6.87968	-1.52761e-11	-15.2761			6.87896	2.10148e-11	21.0148			-6.88056	-1.43034e-11	-14.3034			6.87984	1.59484e-11	15.9484			-6.87912	-1.69748e-11	-16.9748
				3.1204	1.3985e-11								6.87696	1.49899e-11	14.9899			6.87808	3.56906e-11	35.6906			-6.87736	-1.43355e-11	-14.3355			6.87664	1.96892e-11	19.6892			-6.87824	-1.61678e-11	-16.1678			6.87752	1.53476e-11	15.3476			-6.8768	-1.70356e-11	-17.0356
				3.12272	1.40375e-11								6.87464	1.25104e-11	12.5104			6.87576	3.54165e-11	35.4165			-6.87504	-1.57267e-11	-15.7267			6.87432	2.08181e-11	20.8181			-6.87592	-1.50866e-11	-15.0866			6.8752	1.49947e-11	14.9947			-6.87448	-1.74827e-11	-17.4827
				3.12504	1.31994e-11								6.87232	1.53595e-11	15.3595			6.87344	3.59899e-11	35.9899			-6.87272	-1.51128e-11	-15.1128			6.872	1.92743e-11	19.2743			-6.8736	-1.67078e-11	-16.7078			6.87288	1.68031e-11	16.8031			-6.87216	-1.46586e-11	-14.6586
				3.12736	1.46347e-11								6.87	1.49518e-11	14.9518			6.87112	3.64035e-11	36.4035			-6.8704	-1.43451e-11	-14.3451			6.86968	1.94126e-11	19.4126			-6.87128	-1.36966e-11	-13.6966			6.87056	1.63132e-11	16.3132			-6.86984	-1.43713e-11	-14.3713
				3.12968	1.41543e-11								6.86768	1.42115e-11	14.2115			6.8688	3.67051e-11	36.7051			-6.86808	-1.44452e-11	-14.4452			6.86736	1.8757e-11	18.757			-6.86896	-1.46181e-11	-14.6181			6.86824	1.47146e-11	14.7146			-6.86752	-1.56266e-11	-15.6266
				3.132	1.40685e-11								6.86536	1.35904e-11	13.5904			6.86648	3.59374e-11	35.9374			-6.86576	-1.45084e-11	-14.5084			6.86504	2.04199e-11	20.4199			-6.86664	-1.35345e-11	-13.5345			6.86592	1.6492e-11	16.492			-6.8652	-1.73968e-11	-17.3968
				3.13432	1.30897e-11								6.86304	1.29491e-11	12.9491			6.86416	3.5612e-11	35.612			-6.86344	-1.45644e-11	-14.5644			6.86272	2.16335e-11	21.6335			-6.86432	-1.42354e-11	-14.2354			6.8636	1.56146e-11	15.6146			-6.86288	-1.77044e-11	-17.7044
				3.13664	1.22732e-11								6.86072	1.22994e-11	12.2994			6.86184	3.64214e-11	36.4214			-6.86112	-1.31899e-11	-13.1899			6.8604	1.94627e-11	19.4627			-6.862	-1.41531e-11	-14.1531			6.86128	1.32149e-11	13.2149			-6.86056	-1.55217e-11	-15.5217
				3.13896	1.30611e-11								6.8584	1.26713e-11	12.6713			6.85952	3.7927e-11	37.927			-6.8588	-1.31566e-11	-13.1566			6.85808	2.01231e-11	20.1231			-6.85968	-1.602e-11	-16.02			6.85896	1.4072e-11	14.072			-6.85824	-1.89764e-11	-18.9764
				3.14128	1.37347e-11								6.85608	1.25688e-11	12.5688			6.8572	3.55869e-11	35.5869			-6.85648	-1.49113e-11	-14.9113			6.85576	1.99038e-11	19.9038			-6.85736	-1.55241e-11	-15.5241			6.85664	1.52534e-11	15.2534			-6.85592	-1.7367e-11	-17.367
				3.1436	1.49351e-11								6.85376	1.08403e-11	10.8403			6.85488	3.51768e-11	35.1768			-6.85416	-1.35249e-11	-13.5249			6.85344	1.87045e-11	18.7045			-6.85504	-1.56671e-11	-15.6671			6.85432	1.69414e-11	16.9414			-6.8536	-1.69534e-11	-16.9534
				3.14592	1.29145e-11								6.85144	1.25044e-11	12.5044			6.85256	3.49956e-11	34.9956			-6.85184	-1.29825e-11	-12.9825			6.85112	1.62488e-11	16.2488			-6.85272	-1.53369e-11	-15.3369			6.852	1.75756e-11	17.5756			-6.85128	-1.63645e-11	-16.3645
				3.14824	1.41602e-11								6.84912	1.37764e-11	13.7764			6.85024	3.53199e-11	35.3199			-6.84952	-1.3569e-11	-13.569			6.8488	1.88297e-11	18.8297			-6.8504	-1.4593e-11	-14.593			6.84968	1.85734e-11	18.5734			-6.84896	-1.60367e-11	-16.0367
				3.15056	1.42711e-11								6.8468	1.517e-11	15.17			6.84792	3.59076e-11	35.9076			-6.8472	-1.41853e-11	-14.1853			6.84648	1.9744e-11	19.744			-6.84808	-1.5288e-11	-15.288			6.84736	1.50519e-11	15.0519			-6.84664	-1.73015e-11	-17.3015
				3.15288	1.44976e-11								6.84448	1.21289e-11	12.1289			6.8456	3.51232e-11	35.1232			-6.84488	-1.5505e-11	-15.505			6.84416	1.91098e-11	19.1098			-6.84576	-1.44071e-11	-14.4071			6.84504	1.63775e-11	16.3775			-6.84432	-1.5356e-11	-15.356
				3.1552	1.48135e-11								6.84216	1.16378e-11	11.6378			6.84328	3.29977e-11	32.9977			-6.84256	-1.50031e-11	-15.0031			6.84184	1.99145e-11	19.9145			-6.84344	-1.62012e-11	-16.2012			6.84272	1.44154e-11	14.4154			-6.842	-1.54478e-11	-15.4478
				3.15752	1.38181e-11								6.83984	1.37585e-11	13.7585			6.84096	3.51959e-11	35.1959			-6.84024	-1.39386e-11	-13.9386			6.83952	1.92457e-11	19.2457			-6.84112	-1.3873e-11	-13.873			6.8404	1.55526e-11	15.5526			-6.83968	-1.63359e-11	-16.3359
				3.15984	1.40398e-11								6.83752	1.33353e-11	13.3353			6.83864	3.55059e-11	35.5059			-6.83792	-1.54645e-11	-15.4645			6.8372	2.04426e-11	20.4426			-6.8388	-1.40864e-11	-14.0864			6.83808	1.56921e-11	15.6921			-6.83736	-1.80573e-11	-18.0573
				3.16216	1.26284e-11								6.8352	1.16271e-11	11.6271			6.83632	3.51506e-11	35.1506			-6.8356	-1.6219e-11	-16.219			6.83488	1.97714e-11	19.7714			-6.83648	-1.38098e-11	-13.8098			6.83576	1.61153e-11	16.1153			-6.83504	-1.70297e-11	-17.0297
				3.16448	1.21063e-11								6.83288	1.27083e-11	12.7083			6.834	3.6425e-11	36.425			-6.83328	-1.57339e-11	-15.7339			6.83256	2.06154e-11	20.6154			-6.83416	-1.4357e-11	-14.357			6.83344	1.53762e-11	15.3762			-6.83272	-1.66208e-11	-16.6208
				3.1668	1.28489e-11								6.83056	1.3327e-11	13.327			6.83168	3.75956e-11	37.5956			-6.83096	-1.61034e-11	-16.1034			6.83024	2.20424e-11	22.0424			-6.83184	-1.54621e-11	-15.4621			6.83112	1.49625e-11	14.9625			-6.8304	-1.87105e-11	-18.7105
				3.16912	1.25223e-11								6.82824	1.59865e-11	15.9865			6.82936	3.58838e-11	35.8838			-6.82864	-1.64789e-11	-16.4789			6.82792	2.19935e-11	21.9935			-6.82952	-1.6008e-11	-16.008			6.8288	1.46967e-11	14.6967			-6.82808	-1.82253e-11	-18.2253
				3.17144	1.38432e-11								6.82592	1.29336e-11	12.9336			6.82704	3.79497e-11	37.9497			-6.82632	-1.55372e-11	-15.5372			6.8256	2.23416e-11	22.3416			-6.8272	-1.63037e-11	-16.3037			6.82648	1.41078e-11	14.1078			-6.82576	-1.70368e-11	-17.0368
				3.17376	1.43343e-11								6.8236	1.28048e-11	12.8048			6.82472	3.50636e-11	35.0636			-6.824	-1.44834e-11	-14.4834			6.82328	2.04068e-11	20.4068			-6.82488	-1.44309e-11	-14.4309			6.82416	1.58661e-11	15.8661			-6.82344	-1.50985e-11	-15.0985
				3.17608	1.4295e-11								6.82128	1.48886e-11	14.8886			6.8224	3.61174e-11	36.1174			-6.82168	-1.27012e-11	-12.7012			6.82096	2.08205e-11	20.8205			-6.82256	-1.68771e-11	-16.8771			6.82184	1.54298e-11	15.4298			-6.82112	-1.60045e-11	-16.0045
				3.1784	1.36679e-11								6.81896	1.17093e-11	11.7093			6.82008	3.60173e-11	36.0173			-6.81936	-1.5679e-11	-15.679			6.81864	2.1097e-11	21.097			-6.82024	-1.51807e-11	-15.1807			6.81952	1.41853e-11	14.1853			-6.8188	-1.84673e-11	-18.4673
				3.18072	1.36095e-11								6.81664	1.42544e-11	14.2544			6.81776	3.51017e-11	35.1017			-6.81704	-1.66005e-11	-16.6005			6.81632	2.0917e-11	20.917			-6.81792	-1.6957e-11	-16.957			6.8172	1.62154e-11	16.2154			-6.81648	-1.66732e-11	-16.6732
				3.18304	1.45727e-11								6.81432	1.17451e-11	11.7451			6.81544	3.40932e-11	34.0932			-6.81472	-1.92899e-11	-19.2899			6.814	1.95187e-11	19.5187			-6.8156	-1.53405e-11	-15.3405			6.81488	1.65015e-11	16.5015			-6.81416	-1.69701e-11	-16.9701
				3.18536	1.41817e-11								6.812	1.26165e-11	12.6165			6.81312	3.53032e-11	35.3032			-6.8124	-1.72812e-11	-17.2812			6.81168	1.90788e-11	19.0788			-6.81328	-1.37943e-11	-13.7943			6.81256	1.53929e-11	15.3929			-6.81184	-1.61153e-11	-16.1153
				3.18768	1.43033e-11								6.80968	1.27643e-11	12.7643			6.8108	3.4092e-11	34.092			-6.81008	-1.57088e-11	-15.7088			6.80936	1.97619e-11	19.7619			-6.81096	-1.39064e-11	-13.9064			6.81024	1.56635e-11	15.6635			-6.80952	-1.86605e-11	-18.6605
				3.19	1.43045e-11								6.80736	1.2998e-11	12.998			6.80848	3.47119e-11	34.7119			-6.80776	-1.67114e-11	-16.7114			6.80704	2.11519e-11	21.1519			-6.80864	-1.44166e-11	-14.4166			6.80792	1.7311e-11	17.311			-6.8072	-1.76913e-11	-17.6913
				3.19232	1.39481e-11								6.80504	1.31362e-11	13.1362			6.80616	3.44723e-11	34.4723			-6.80544	-1.55705e-11	-15.5705			6.80472	2.09957e-11	20.9957			-6.80632	-1.48648e-11	-14.8648			6.8056	1.57743e-11	15.7743			-6.80488	-1.56635e-11	-15.6635
				3.19464	1.45012e-11								6.80272	1.57422e-11	15.7422			6.80384	3.70913e-11	37.0913			-6.80312	-1.49697e-11	-14.9697			6.8024	2.07764e-11	20.7764			-6.804	-1.45549e-11	-14.5549			6.80328	1.56742e-11	15.6742			-6.80256	-1.64861e-11	-16.4861
				3.19696	1.36989e-11								6.8004	1.31792e-11	13.1792			6.80152	3.48395e-11	34.8395			-6.8008	-1.37562e-11	-13.7562			6.80008	1.99848e-11	19.9848			-6.80168	-1.47563e-11	-14.7563			6.80096	1.52772e-11	15.2772			-6.80024	-1.5809e-11	-15.809
				3.19928	1.30325e-11								6.79808	1.34247e-11	13.4247			6.7992	3.45677e-11	34.5677			-6.79848	-1.33604e-11	-13.3604			6.79776	1.82301e-11	18.2301			-6.79936	-1.54418e-11	-15.4418			6.79864	1.55455e-11	15.5455			-6.79792	-1.79976e-11	-17.9976
				3.2016	1.28215e-11								6.79576	1.31207e-11	13.1207			6.79688	3.50588e-11	35.0588			-6.79616	-1.4152e-11	-14.152			6.79544	2.0737e-11	20.737			-6.79704	-1.36322e-11	-13.6322			6.79632	1.36012e-11	13.6012			-6.7956	-1.81347e-11	-18.1347
				3.20392	1.3389e-11								6.79344	1.22553e-11	12.2553			6.79456	3.65299e-11	36.5299			-6.79384	-1.55372e-11	-15.5372			6.79312	2.04712e-11	20.4712			-6.79472	-1.28085e-11	-12.8085			6.794	1.48791e-11	14.8791			-6.79328	-1.60367e-11	-16.0367
				3.20624	1.30623e-11								6.79112	1.17081e-11	11.7081			6.79224	3.56465e-11	35.6465			-6.79152	-1.60724e-11	-16.0724			6.7908	2.05332e-11	20.5332			-6.7924	-1.50794e-11	-15.0794			6.79168	1.49196e-11	14.9196			-6.79096	-1.68771e-11	-16.8771
				3.20856	1.50281e-11								6.7888	1.24901e-11	12.4901			6.78992	3.60208e-11	36.0208			-6.7892	-1.16653e-11	-11.6653			6.78848	1.86389e-11	18.6389			-6.79008	-1.59234e-11	-15.9234			6.78936	1.62774e-11	16.2774			-6.78864	-1.61392e-11	-16.1392
				3.21088	1.45119e-11								6.78648	1.27429e-11	12.7429			6.7876	3.65132e-11	36.5132			-6.78688	-1.54525e-11	-15.4525			6.78616	2.03782e-11	20.3782			-6.78776	-1.59961e-11	-15.9961			6.78704	1.67078e-11	16.7078			-6.78632	-1.58531e-11	-15.8531
				3.2132	1.22112e-11								6.78416	1.40482e-11	14.0482			6.78528	3.65632e-11	36.5632			-6.78456	-1.63037e-11	-16.3037			6.78384	1.96355e-11	19.6355			-6.78544	-1.66792e-11	-16.6792			6.78472	1.49291e-11	14.9291			-6.784	-1.61547e-11	-16.1547
				3.21552	1.2123e-11								6.78184	1.36405e-11	13.6405			6.78296	3.67719e-11	36.7719			-6.78224	-1.49948e-11	-14.9948			6.78152	1.96665e-11	19.6665			-6.78312	-1.42032e-11	-14.2032			6.7824	1.36941e-11	13.6941			-6.78168	-1.91623e-11	-19.1623
				3.21784	1.29014e-11								6.77952	1.20836e-11	12.0836			6.78064	3.78972e-11	37.8972			-6.77992	-1.37776e-11	-13.7776			6.7792	2.2406e-11	22.406			-6.7808	-1.55169e-11	-15.5169			6.78008	1.48862e-11	14.8862			-6.77936	-1.69796e-11	-16.9796
				3.22016	1.60116e-11								6.7772	1.32388e-11	13.2388			6.77832	3.68052e-11	36.8052			-6.7776	-1.39696e-11	-13.9696			6.77688	2.09897e-11	20.9897			-6.77848	-1.47409e-11	-14.7409			6.77776	1.41769e-11	14.1769			-6.77704	-1.70225e-11	-17.0225
				3.22248	1.53225e-11								6.77488	1.45691e-11	14.5691			6.776	3.59696e-11	35.9696			-6.77528	-1.34665e-11	-13.4665			6.77456	2.28077e-11	22.8077			-6.77616	-1.43606e-11	-14.3606			6.77544	1.31446e-11	13.1446			-6.77472	-1.69474e-11	-16.9474
				3.2248	1.49327e-11								6.77256	1.2992e-11	12.992			6.77368	3.53843e-11	35.3843			-6.77296	-1.62274e-11	-16.2274			6.77224	2.17622e-11	21.7622			-6.77384	-1.55944e-11	-15.5944			6.77312	1.56337e-11	15.6337			-6.7724	-1.76376e-11	-17.6376
				3.22712	1.51247e-11								6.77024	1.40136e-11	14.0136			6.77136	3.49396e-11	34.9396			-6.77064	-1.58793e-11	-15.8793			6.76992	1.88321e-11	18.8321			-6.77152	-1.52534e-11	-15.2534			6.7708	1.51533e-11	15.1533			-6.77008	-1.57124e-11	-15.7124
				3.22944	1.20395e-11								6.76792	1.34939e-11	13.4939			6.76904	3.39216e-11	33.9216			-6.76832	-1.66136e-11	-16.6136			6.7676	1.78069e-11	17.8069			-6.7692	-1.46193e-11	-14.6193			6.76848	1.47277e-11	14.7277			-6.76776	-1.7404e-11	-17.404
				3.23176	1.25319e-11								6.7656	1.28203e-11	12.8203			6.76672	3.51602e-11	35.1602			-6.766	-1.60605e-11	-16.0605			6.76528	2.08813e-11	20.8813			-6.76688	-1.28562e-11	-12.8562			6.76616	1.52272e-11	15.2272			-6.76544	-1.82063e-11	-18.2063
				3.23408	1.56849e-11								6.76328	1.18476e-11	11.8476			6.7644	3.31217e-11	33.1217			-6.76368	-1.584e-11	-15.84			6.76296	2.24596e-11	22.4596			-6.76456	-1.44834e-11	-14.4834			6.76384	1.50054e-11	15.0054			-6.76312	-1.57446e-11	-15.7446
				3.2364	1.41674e-11								6.76096	1.34819e-11	13.4819			6.76208	3.55369e-11	35.5369			-6.76136	-1.44905e-11	-14.4905			6.76064	2.20388e-11	22.0388			-6.76224	-1.56802e-11	-15.6802			6.76152	1.56015e-11	15.6015			-6.7608	-1.70368e-11	-17.0368
				3.23872	1.56933e-11								6.75864	1.20336e-11	12.0336			6.75976	3.48121e-11	34.8121			-6.75904	-1.49018e-11	-14.9018			6.75832	2.06285e-11	20.6285			-6.75992	-1.62941e-11	-16.2941			6.7592	1.51688e-11	15.1688			-6.75848	-1.49137e-11	-14.9137
				3.24104	1.59722e-11								6.75632	1.16712e-11	11.6712			6.75744	3.60065e-11	36.0065			-6.75672	-1.62024e-11	-16.2024			6.756	1.98227e-11	19.8227			-6.7576	-1.3935e-11	-13.935			6.75688	1.39993e-11	13.9993			-6.75616	-1.66565e-11	-16.6565
				3.24336	1.4407e-11								6.754	1.20812e-11	12.0812			6.75512	3.70484e-11	37.0484			-6.7544	-1.40304e-11	-14.0304			6.75368	1.99038e-11	19.9038			-6.75528	-1.69224e-11	-16.9224			6.75456	1.3439e-11	13.439			-6.75384	-1.6262e-11	-16.262
				3.24568	1.34319e-11								6.75168	1.32984e-11	13.2984			6.7528	3.63713e-11	36.3713			-6.75208	-1.55229e-11	-15.5229			6.75136	2.11304e-11	21.1304			-6.75296	-1.68246e-11	-16.8246			6.75224	1.36214e-11	13.6214			-6.75152	-1.6616e-11	-16.616
				3.248	1.44535e-11								6.74936	1.40768e-11	14.0768			6.75048	3.33208e-11	33.3208			-6.74976	-1.57804e-11	-15.7804			6.74904	2.23404e-11	22.3404			-6.75064	-1.51748e-11	-15.1748			6.74992	1.37251e-11	13.7251			-6.7492	-1.62763e-11	-16.2763
				3.25032	1.67352e-11								6.74704	1.39194e-11	13.9194			6.74816	3.39931e-11	33.9931			-6.74744	-1.50723e-11	-15.0723			6.74672	2.12103e-11	21.2103			-6.74832	-1.56433e-11	-15.6433			6.7476	1.61928e-11	16.1928			-6.74688	-1.62965e-11	-16.2965
				3.25264	1.48529e-11								6.74472	1.10191e-11	11.0191			6.74584	3.41004e-11	34.1004			-6.74512	-1.44106e-11	-14.4106			6.7444	1.87081e-11	18.7081			-6.746	-1.62751e-11	-16.2751			6.74528	1.40303e-11	14.0303			-6.74456	-1.75399e-11	-17.5399
				3.25496	1.50174e-11								6.7424	1.25092e-11	12.5092			6.74352	3.42542e-11	34.2542			-6.7428	-1.60986e-11	-16.0986			6.74208	2.06166e-11	20.6166			-6.74368	-1.53083e-11	-15.3083			6.74296	1.5046e-11	15.046			-6.74224	-1.7404e-11	-17.404
				3.25728	1.39934e-11								6.74008	1.05589e-11	10.5589			6.7412	3.41469e-11	34.1469			-6.74048	-1.39767e-11	-13.9767			6.73976	1.84625e-11	18.4625			-6.74136	-1.62524e-11	-16.2524			6.74064	1.40065e-11	14.0065			-6.73992	-1.76126e-11	-17.6126
				3.2596	1.34045e-11								6.73776	1.2514e-11	12.514			6.73888	3.41814e-11	34.1814			-6.73816	-1.57005e-11	-15.7005			6.73744	1.94043e-11	19.4043			-6.73904	-1.56671e-11	-15.6671			6.73832	1.30015e-11	13.0015			-6.7376	-1.51176e-11	-15.1176
				3.26192	1.47158e-11								6.73544	1.1428e-11	11.428			6.73656	3.55619e-11	35.5619			-6.73584	-1.53369e-11	-15.3369			6.73512	2.00194e-11	20.0194			-6.73672	-1.59186e-11	-15.9186			6.736	1.36941e-11	13.6941			-6.73528	-1.50556e-11	-15.0556
				3.26424	1.50889e-11								6.73312	1.28025e-11	12.8025			6.73424	3.31074e-11	33.1074			-6.73352	-1.52272e-11	-15.2272			6.7328	1.95175e-11	19.5175			-6.7344	-1.71441e-11	-17.1441			6.73368	1.35845e-11	13.5845			-6.73296	-1.73182e-11	-17.3182
				3.26656	1.4233e-11								6.7308	1.37132e-11	13.7132			6.73192	3.43603e-11	34.3603			-6.7312	-1.49995e-11	-14.9995			6.73048	1.92505e-11	19.2505			-6.73208	-1.42485e-11	-14.2485			6.73136	1.54835e-11	15.4835			-6.73064	-1.77723e-11	-17.7723
				3.26888	1.65468e-11								6.72848	1.53082e-11	15.3082			6.7296	3.43018e-11	34.3018			-6.72888	-1.41591e-11	-14.1591			6.72816	2.02709e-11	20.2709			-6.72976	-1.54978e-11	-15.4978			6.72904	1.59281e-11	15.9281			-6.72832	-1.50079e-11	-15.0079
				3.2712	1.32078e-11								6.72616	1.42866e-11	14.2866			6.72728	3.51447e-11	35.1447			-6.72656	-1.46491e-11	-14.6491			6.72584	2.1531e-11	21.531			-6.72744	-1.65302e-11	-16.5302			6.72672	1.67185e-11	16.7185			-6.726	-1.64718e-11	-16.4718
				3.27352	1.30599e-11								6.72384	1.38265e-11	13.8265			6.72496	3.55881e-11	35.5881			-6.72424	-1.6504e-11	-16.504			6.72352	2.06262e-11	20.6262			-6.72512	-1.54633e-11	-15.4633			6.7244	1.52129e-11	15.2129			-6.72368	-1.76722e-11	-17.6722
				3.27584	1.56253e-11								6.72152	1.34998e-11	13.4998			6.72264	3.41004e-11	34.1004			-6.72192	-1.6101e-11	-16.101			6.7212	2.05677e-11	20.5677			-6.7228	-1.53023e-11	-15.3023			6.72208	1.47253e-11	14.7253			-6.72136	-1.8031e-11	-18.031
				3.27816	1.4171e-11								6.7192	1.22851e-11	12.2851			6.72032	3.42768e-11	34.2768			-6.7196	-1.56981e-11	-15.6981			6.71888	1.93351e-11	19.3351			-6.72048	-1.54704e-11	-15.4704			6.71976	1.50794e-11	15.0794			-6.71904	-1.63347e-11	-16.3347
				3.28048	1.39779e-11								6.71688	1.38873e-11	13.8873			6.718	3.62152e-11	36.2152			-6.71728	-1.44083e-11	-14.4083			6.71656	1.98406e-11	19.8406			-6.71816	-1.3755e-11	-13.755			6.71744	1.58804e-11	15.8804			-6.71672	-1.59377e-11	-15.9377
				3.2828	1.51354e-11								6.71456	1.29896e-11	12.9896			6.71568	3.45748e-11	34.5748			-6.71496	-1.40876e-11	-14.0876			6.71424	1.93768e-11	19.3768			-6.71584	-1.46789e-11	-14.6789			6.71512	1.48982e-11	14.8982			-6.7144	-1.79178e-11	-17.9178
				3.28512	1.2657e-11								6.71224	1.32614e-11	13.2614			6.71336	3.54904e-11	35.4904			-6.71264	-1.38968e-11	-13.8968			6.71192	2.0222e-11	20.222			-6.71352	-1.30254e-11	-13.0254			6.7128	1.50805e-11	15.0805			-6.71208	-1.69999e-11	-16.9999
				3.28744	1.27953e-11								6.70992	1.31732e-11	13.1732			6.71104	3.59589e-11	35.9589			-6.71032	-1.40721e-11	-14.0721			6.7096	1.88082e-11	18.8082			-6.7112	-1.33616e-11	-13.3616			6.71048	1.42568e-11	14.2568			-6.70976	-1.53905e-11	-15.3905
				3.28976	1.44964e-11								6.7076	1.34557e-11	13.4557			6.70872	3.56322e-11	35.6322			-6.708	-1.46109e-11	-14.6109			6.70728	1.70475e-11	17.0475			-6.70888	-1.3898e-11	-13.898			6.70816	1.33425e-11	13.3425			-6.70744	-1.54788e-11	-15.4788
				3.29208	1.41984e-11								6.70528	1.3377e-11	13.377			6.7064	3.6239e-11	36.239			-6.70568	-1.52105e-11	-15.2105			6.70496	1.85972e-11	18.5972			-6.70656	-1.55062e-11	-15.5062			6.70584	1.49709e-11	14.9709			-6.70512	-1.64849e-11	-16.4849
				3.2944	1.27715e-11								6.70296	1.42556e-11	14.2556			6.70408	3.32051e-11	33.2051			-6.70336	-1.42867e-11	-14.2867			6.70264	2.05415e-11	20.5415			-6.70424	-1.50174e-11	-15.0174			6.70352	1.73825e-11	17.3825			-6.7028	-1.55551e-11	-15.5551
				3.29672	1.43724e-11								6.70064	1.25605e-11	12.5605			6.70176	3.40789e-11	34.0789			-6.70104	-1.51891e-11	-15.1891			6.70032	1.83314e-11	18.3314			-6.70192	-1.47277e-11	-14.7277			6.7012	1.64669e-11	16.4669			-6.70048	-1.49161e-11	-14.9161
				3.29904	1.45298e-11								6.69832	1.39242e-11	13.9242			6.69944	3.41159e-11	34.1159			-6.69872	-1.43153e-11	-14.3153			6.698	1.92779e-11	19.2779			-6.6996	-1.59139e-11	-15.9139			6.69888	1.61057e-11	16.1057			-6.69816	-1.71095e-11	-17.1095
				3.30136	1.37728e-11								6.696	1.33377e-11	13.3377			6.69712	3.3744e-11	33.744			-6.6964	-1.45811e-11	-14.5811			6.69568	1.99884e-11	19.9884			-6.69728	-1.39541e-11	-13.9541			6.69656	1.553e-11	15.53			-6.69584	-1.66029e-11	-16.6029
				3.30368	1.41591e-11								6.69368	1.26105e-11	12.6105			6.6948	3.37738e-11	33.7738			-6.69408	-1.4363e-11	-14.363			6.69336	2.05022e-11	20.5022			-6.69496	-1.31876e-11	-13.1876			6.69424	1.50579e-11	15.0579			-6.69352	-1.55097e-11	-15.5097
				3.306	1.43295e-11								6.69136	1.08546e-11	10.8546			6.69248	3.34006e-11	33.4006			-6.69176	-1.54633e-11	-15.4633			6.69104	1.95437e-11	19.5437			-6.69264	-1.31637e-11	-13.1637			6.69192	1.3557e-11	13.557			-6.6912	-1.64348e-11	-16.4348
				3.30832	1.54739e-11								6.68904	1.19525e-11	11.9525			6.69016	3.33589e-11	33.3589			-6.68944	-1.36179e-11	-13.6179			6.68872	1.97929e-11	19.7929			-6.69032	-1.57064e-11	-15.7064			6.6896	1.47587e-11	14.7587			-6.68888	-1.51915e-11	-15.1915
				3.31064	1.47825e-11								6.68672	1.31398e-11	13.1398			6.68784	3.38107e-11	33.8107			-6.68712	-1.41281e-11	-14.1281			6.6864	1.89405e-11	18.9405			-6.688	-1.73646e-11	-17.3646			6.68728	1.54727e-11	15.4727			-6.68656	-1.65147e-11	-16.5147
				3.31296	1.42318e-11								6.6844	1.22219e-11	12.2219			6.68552	3.16947e-11	31.6947			-6.6848	-1.43534e-11	-14.3534			6.68408	1.95318e-11	19.5318			-6.68568	-1.54239e-11	-15.4239			6.68496	1.56933e-11	15.6933			-6.68424	-1.77545e-11	-17.7545
				3.31528	1.49864e-11								6.68208	1.22326e-11	12.2326			6.6832	3.31026e-11	33.1026			-6.68248	-1.42235e-11	-14.2235			6.68176	2.0718e-11	20.718			-6.68336	-1.59544e-11	-15.9544			6.68264	1.41841e-11	14.1841			-6.68192	-1.59675e-11	-15.9675
				3.3176	1.42449e-11								6.67976	1.34402e-11	13.4402			6.68088	3.49217e-11	34.9217			-6.68016	-1.39922e-11	-13.9922			6.67944	1.90478e-11	19.0478			-6.68104	-1.56015e-11	-15.6015			6.68032	1.44976e-11	14.4976			-6.6796	-1.66923e-11	-16.6923
				3.31992	1.55168e-11								6.67744	1.36119e-11	13.6119			6.67856	3.21644e-11	32.1644			-6.67784	-1.57386e-11	-15.7386			6.67712	2.01183e-11	20.1183			-6.67872	-1.4835e-11	-14.835			6.678	1.47623e-11	14.7623			-6.67728	-1.68652e-11	-16.8652
				3.32224	1.53035e-11								6.67512	1.29932e-11	12.9932			6.67624	3.39502e-11	33.9502			-6.67552	-1.46669e-11	-14.6669			6.6748	1.92994e-11	19.2994			-6.6764	-1.61463e-11	-16.1463			6.67568	1.40351e-11	14.0351			-6.67496	-1.54311e-11	-15.4311
				3.32456	1.54203e-11								6.6728	1.31005e-11	13.1005			6.67392	3.38691e-11	33.8691			-6.6732	-1.47206e-11	-14.7206			6.67248	2.07001e-11	20.7001			-6.67408	-1.45728e-11	-14.5728			6.67336	1.40768e-11	14.0768			-6.67264	-1.5139e-11	-15.139
				3.32688	1.47003e-11								6.67048	1.28501e-11	12.8501			6.6716	3.52841e-11	35.2841			-6.67088	-1.61785e-11	-16.1785			6.67016	1.95223e-11	19.5223			-6.67176	-1.34129e-11	-13.4129			6.67104	1.47789e-11	14.7789			-6.67032	-1.34474e-11	-13.4474
				3.3292	1.36798e-11								6.66816	1.2775e-11	12.775			6.66928	3.55917e-11	35.5917			-6.66856	-1.72574e-11	-17.2574			6.66784	2.08992e-11	20.8992			-6.66944	-1.28633e-11	-12.8633			6.66872	1.4326e-11	14.326			-6.668	-1.33723e-11	-13.3723
				3.33152	1.37979e-11								6.66584	1.34903e-11	13.4903			6.66696	3.52817e-11	35.2817			-6.66624	-1.36084e-11	-13.6084			6.66552	1.93399e-11	19.3399			-6.66712	-1.43689e-11	-14.3689			6.6664	1.41817e-11	14.1817			-6.66568	-1.52463e-11	-15.2463
				3.33384	1.57839e-11								6.66352	1.08999e-11	10.8999			6.66464	3.20142e-11	32.0142			-6.66392	-1.33568e-11	-13.3568			6.6632	2.10994e-11	21.0994			-6.6648	-1.51807e-11	-15.1807			6.66408	1.31148e-11	13.1148			-6.66336	-1.82337e-11	-18.2337
				3.33616	1.77973e-11								6.6612	1.1701e-11	11.701			6.66232	3.3465e-11	33.465			-6.6616	-1.21779e-11	-12.1779			6.66088	2.10649e-11	21.0649			-6.66248	-1.37037e-11	-13.7037			6.66176	1.55598e-11	15.5598			-6.66104	-1.83636e-11	-18.3636
				3.33848	1.62989e-11								6.65888	1.09571e-11	10.9571			6.66	3.38405e-11	33.8405			-6.65928	-1.56111e-11	-15.6111			6.65856	2.07847e-11	20.7847			-6.66016	-1.21087e-11	-12.1087			6.65944	1.51866e-11	15.1866			-6.65872	-1.69641e-11	-16.9641
				3.3408	1.71059e-11								6.65656	1.21063e-11	12.1063			6.65768	3.43793e-11	34.3793			-6.65696	-1.47754e-11	-14.7754			6.65624	2.04509e-11	20.4509			-6.65784	-1.45966e-11	-14.5966			6.65712	1.37979e-11	13.7979			-6.6564	-1.5623e-11	-15.623
				3.34312	1.56873e-11								6.65424	1.34343e-11	13.4343			6.65536	3.28868e-11	32.8868			-6.65464	-1.38659e-11	-13.8659			6.65392	2.05093e-11	20.5093			-6.65552	-1.36251e-11	-13.6251			6.6548	1.45656e-11	14.5656			-6.65408	-1.571e-11	-15.71
				3.34544	1.43569e-11								6.65192	1.26201e-11	12.6201			6.65304	3.40408e-11	34.0408			-6.65232	-1.33461e-11	-13.3461			6.6516	1.83767e-11	18.3767			-6.6532	-1.6684e-11	-16.684			6.65248	1.3228e-11	13.228			-6.65176	-1.63228e-11	-16.3228
				3.34776	1.68484e-11								6.6496	1.18178e-11	11.8178			6.65072	3.35568e-11	33.5568			-6.65	-1.46741e-11	-14.6741			6.64928	2.02602e-11	20.2602			-6.65088	-1.65862e-11	-16.5862			6.65016	1.3029e-11	13.029			-6.64944	-1.68783e-11	-16.8783
				3.35008	1.55765e-11								6.64728	1.53941e-11	15.3941			6.6484	3.29596e-11	32.9596			-6.64768	-1.35273e-11	-13.5273			6.64696	1.8633e-11	18.633			-6.64856	-1.55312e-11	-15.5312			6.64784	1.43379e-11	14.3379			-6.64712	-1.76829e-11	-17.6829
				3.3524	1.50031e-11								6.64496	1.27059e-11	12.7059			6.64608	3.14802e-11	31.4802			-6.64536	-1.33366e-11	-13.3366			6.64464	1.92183e-11	19.2183			-6.64624	-1.70869e-11	-17.0869			6.64552	1.48469e-11	14.8469			-6.6448	-1.49435e-11	-14.9435
				3.35472	1.54048e-11								6.64264	1.05577e-11	10.5577			6.64376	3.44509e-11	34.4509			-6.64304	-1.4481e-11	-14.481			6.64232	1.79082e-11	17.9082			-6.64392	-1.54096e-11	-15.4096			6.6432	1.5133e-11	15.133			-6.64248	-1.53893e-11	-15.3893
				3.35704	1.4959e-11								6.64032	9.73878e-12	9.73878			6.64144	3.22634e-11	32.2634			-6.64072	-1.4543e-11	-14.543			6.64	1.9663e-11	19.663			-6.6416	-1.41877e-11	-14.1877			6.64088	1.29157e-11	12.9157			-6.64016	-1.82802e-11	-18.2802
				3.35936	1.57612e-11								6.638	1.20526e-11	12.0526			6.63912	3.29894e-11	32.9894			-6.6384	-1.43618e-11	-14.3618			6.63768	1.96141e-11	19.6141			-6.63928	-1.40721e-11	-14.0721			6.63856	1.16247e-11	11.6247			-6.63784	-1.8602e-11	-18.602
				3.36168	1.63966e-11								6.63568	1.34247e-11	13.4247			6.6368	3.32731e-11	33.2731			-6.63608	-1.45608e-11	-14.5608			6.63536	2.01624e-11	20.1624			-6.63696	-1.4357e-11	-14.357			6.63624	1.51556e-11	15.1556			-6.63552	-1.7671e-11	-17.671
				3.364	1.42556e-11								6.63336	1.42032e-11	14.2032			6.63448	3.4793e-11	34.793			-6.63376	-1.29646e-11	-12.9646			6.63304	1.97321e-11	19.7321			-6.63464	-1.35237e-11	-13.5237			6.63392	1.31184e-11	13.1184			-6.6332	-1.7646e-11	-17.646
				3.36632	1.50662e-11								6.63104	1.13803e-11	11.3803			6.63216	3.41028e-11	34.1028			-6.63144	-1.46419e-11	-14.6419			6.63072	1.86699e-11	18.6699			-6.63232	-1.38146e-11	-13.8146			6.6316	1.26272e-11	12.6272			-6.63088	-1.73921e-11	-17.3921
				3.36864	1.54191e-11								6.62872	1.14256e-11	11.4256			6.62984	3.26341e-11	32.6341			-6.62912	-1.52582e-11	-15.2582			6.6284	1.87903e-11	18.7903			-6.63	-1.49077e-11	-14.9077			6.62928	1.34545e-11	13.4545			-6.62856	-1.83994e-11	-18.3994
				3.37096	1.62703e-11								6.6264	1.01536e-11	10.1536			6.62752	3.19129e-11	31.9129			-6.6268	-1.30624e-11	-13.0624			6.62608	1.90454e-11	19.0454			-6.62768	-1.48756e-11	-14.8756			6.62696	1.22982e-11	12.2982			-6.62624	-1.7547e-11	-17.547
				3.37328	1.47027e-11								6.62408	1.21039e-11	12.1039			6.6252	3.27402e-11	32.7402			-6.62448	-1.63108e-11	-16.3108			6.62376	1.99884e-11	19.9884			-6.62536	-1.66041e-11	-16.6041			6.62464	1.35678e-11	13.5678			-6.62392	-1.62441e-11	-16.2441
				3.3756	1.63775e-11								6.62176	1.28239e-11	12.8239			6.62288	3.18473e-11	31.8473			-6.62216	-1.46288e-11	-14.6288			6.62144	1.91599e-11	19.1599			-6.62304	-1.59616e-11	-15.9616			6.62232	1.38658e-11	13.8658			-6.6216	-1.72633e-11	-17.2633
				3.37792	1.4537e-11								6.61944	1.32435e-11	13.2435			6.62056	2.99221e-11	29.9221			-6.61984	-1.50067e-11	-15.0067			6.61912	1.75029e-11	17.5029			-6.62072	-1.52844e-11	-15.2844			6.62	1.28525e-11	12.8525			-6.61928	-1.83803e-11	-18.3803
				3.38024	1.37251e-11								6.61712	1.13374e-11	11.3374			6.61824	3.23254e-11	32.3254			-6.61752	-1.49483e-11	-14.9483			6.6168	1.78462e-11	17.8462			-6.6184	-1.47909e-11	-14.7909			6.61768	1.25187e-11	12.5187			-6.61696	-1.64396e-11	-16.4396
				3.38256	1.50126e-11								6.6148	1.16163e-11	11.6163			6.61592	3.38107e-11	33.8107			-6.6152	-1.39445e-11	-13.9445			6.61448	1.97249e-11	19.7249			-6.61608	-1.54883e-11	-15.4883			6.61536	1.45322e-11	14.5322			-6.61464	-1.63406e-11	-16.3406
				3.38488	1.55622e-11								6.61248	1.28132e-11	12.8132			6.6136	3.26997e-11	32.6997			-6.61288	-1.36e-11	-13.6			6.61216	1.89632e-11	18.9632			-6.61376	-1.65087e-11	-16.5087			6.61304	1.58065e-11	15.8065			-6.61232	-1.61034e-11	-16.1034
				3.3872	1.62488e-11								6.61016	1.24866e-11	12.4866			6.61128	3.22312e-11	32.2312			-6.61056	-1.41317e-11	-14.1317			6.60984	1.68138e-11	16.8138			-6.61144	-1.49006e-11	-14.9006			6.61072	1.47706e-11	14.7706			-6.61	-1.78701e-11	-17.8701
				3.38952	1.52558e-11								6.60784	1.11598e-11	11.1598			6.60896	3.25483e-11	32.5483			-6.60824	-1.52368e-11	-15.2368			6.60752	1.86461e-11	18.6461			-6.60912	-1.43713e-11	-14.3713			6.6084	1.50424e-11	15.0424			-6.60768	-1.64658e-11	-16.4658
				3.39184	1.71858e-11								6.60552	9.95574e-12	9.95574			6.60664	3.29536e-11	32.9536			-6.60592	-1.38301e-11	-13.8301			6.6052	1.93864e-11	19.3864			-6.6068	-1.50663e-11	-15.0663			6.60608	1.41066e-11	14.1066			-6.60536	-1.7218e-11	-17.218
				3.39416	1.53941e-11								6.6032	1.06221e-11	10.6221			6.60432	3.10248e-11	31.0248			-6.6036	-1.49423e-11	-14.9423			6.60288	2.09492e-11	20.9492			-6.60448	-1.42819e-11	-14.2819			6.60376	1.37526e-11	13.7526			-6.60304	-1.5952e-11	-15.952
				3.39648	1.64443e-11								6.60088	1.08081e-11	10.8081			6.602	3.14825e-11	31.4825			-6.60128	-1.42771e-11	-14.2771			6.60056	1.84697e-11	18.4697			-6.60216	-1.35917e-11	-13.5917			6.60144	1.20514e-11	12.0514			-6.60072	-1.82063e-11	-18.2063
				3.3988	1.80047e-11								6.59856	1.26332e-11	12.6332			6.59968	3.16435e-11	31.6435			-6.59896	-1.36012e-11	-13.6012			6.59824	1.84709e-11	18.4709			-6.59984	-1.73468e-11	-17.3468			6.59912	1.34963e-11	13.4963			-6.5984	-1.63394e-11	-16.3394
				3.40112	1.66613e-11								6.59624	1.24579e-11	12.4579			6.59736	3.47548e-11	34.7548			-6.59664	-1.30254e-11	-13.0254			6.59592	1.72633e-11	17.2633			-6.59752	-1.37836e-11	-13.7836			6.5968	1.45596e-11	14.5596			-6.59608	-1.58853e-11	-15.8853
				3.40344	1.68246e-11								6.59392	1.22004e-11	12.2004			6.59504	3.28833e-11	32.8833			-6.59432	-1.39827e-11	-13.9827			6.5936	1.77484e-11	17.7484			-6.5952	-1.32031e-11	-13.2031			6.59448	1.43367e-11	14.3367			-6.59376	-1.50198e-11	-15.0198
				3.40576	1.45143e-11								6.5916	1.16008e-11	11.6008			6.59272	3.23528e-11	32.3528			-6.592	-1.51199e-11	-15.1199			6.59128	1.83016e-11	18.3016			-6.59288	-1.23757e-11	-12.3757			6.59216	1.48135e-11	14.8135			-6.59144	-1.47528e-11	-14.7528
				3.40808	1.71941e-11								6.58928	1.09356e-11	10.9356			6.5904	3.07446e-11	30.7446			-6.58968	-1.45084e-11	-14.5084			6.58896	2.05368e-11	20.5368			-6.59056	-1.2458e-11	-12.458			6.58984	1.36727e-11	13.6727			-6.58912	-1.59401e-11	-15.9401
				3.4104	1.77389e-11								6.58696	1.30683e-11	13.0683			6.58808	3.13788e-11	31.3788			-6.58736	-1.41281e-11	-14.1281			6.58664	1.69331e-11	16.9331			-6.58824	-1.44965e-11	-14.4965			6.58752	1.36977e-11	13.6977			-6.5868	-1.87832e-11	-18.7832
				3.41272	1.76698e-11								6.58464	1.27607e-11	12.7607			6.58576	3.42661e-11	34.2661			-6.58504	-1.50496e-11	-15.0496			6.58432	1.9173e-11	19.173			-6.58592	-1.56349e-11	-15.6349			6.5852	1.49792e-11	14.9792			-6.58448	-1.76949e-11	-17.6949
				3.41504	1.54429e-11								6.58232	1.42508e-11	14.2508			6.58344	3.46321e-11	34.6321			-6.58272	-1.38718e-11	-13.8718			6.582	1.94567e-11	19.4567			-6.5836	-1.59711e-11	-15.9711			6.58288	1.51378e-11	15.1378			-6.58216	-1.72681e-11	-17.2681
				3.41736	1.41197e-11								6.58	1.2744e-11	12.744			6.58112	3.52651e-11	35.2651			-6.5804	-1.44118e-11	-14.4118			6.57968	1.75923e-11	17.5923			-6.58128	-1.6746e-11	-16.746			6.58056	1.40089e-11	14.0089			-6.57984	-1.78629e-11	-17.8629
				3.41968	1.70487e-11								6.57768	1.10417e-11	11.0417			6.5788	3.41469e-11	34.1469			-6.57808	-1.50937e-11	-15.0937			6.57736	1.83302e-11	18.3302			-6.57896	-1.52332e-11	-15.2332			6.57824	1.59687e-11	15.9687			-6.57752	-1.64277e-11	-16.4277
				3.422	1.51866e-11								6.57536	1.22124e-11	12.2124			6.57648	3.19534e-11	31.9534			-6.57576	-1.40101e-11	-14.0101			6.57504	2.05081e-11	20.5081			-6.57664	-1.48911e-11	-14.8911			6.57592	1.48314e-11	14.8314			-6.5752	-1.71417e-11	-17.1417
				3.42432	1.56682e-11								6.57304	1.2446e-11	12.446			6.57416	3.27283e-11	32.7283			-6.57344	-1.23722e-11	-12.3722			6.57272	1.87188e-11	18.7188			-6.57432	-1.36179e-11	-13.6179			6.5736	1.3625e-11	13.625			-6.57288	-1.74064e-11	-17.4064
				3.42664	1.66255e-11								6.57072	1.16688e-11	11.6688			6.57184	3.22765e-11	32.2765			-6.57112	-1.21469e-11	-12.1469			6.5704	1.82479e-11	18.2479			-6.572	-1.38992e-11	-13.8992			6.57128	1.48183e-11	14.8183			-6.57056	-1.49125e-11	-14.9125
				3.42896	1.56182e-11								6.5684	1.26892e-11	12.6892			6.56952	3.344e-11	33.44			-6.5688	-1.24699e-11	-12.4699			6.56808	1.79678e-11	17.9678			-6.56968	-1.58805e-11	-15.8805			6.56896	1.36739e-11	13.6739			-6.56824	-1.56719e-11	-15.6719
				3.43128	1.67888e-11								6.56608	1.42055e-11	14.2055			6.5672	3.25972e-11	32.5972			-6.56648	-1.20193e-11	-12.0193			6.56576	1.81108e-11	18.1108			-6.56736	-1.37943e-11	-13.7943			6.56664	1.25402e-11	12.5402			-6.56592	-1.54609e-11	-15.4609
				3.4336	1.73861e-11								6.56376	1.08725e-11	10.8725			6.56488	3.18593e-11	31.8593			-6.56416	-1.39278e-11	-13.9278			6.56344	1.94055e-11	19.4055			-6.56504	-1.34832e-11	-13.4832			6.56432	1.5307e-11	15.307			-6.5636	-1.49459e-11	-14.9459
				3.43592	1.47193e-11								6.56144	1.1186e-11	11.186			6.56256	3.16053e-11	31.6053			-6.56184	-1.51187e-11	-15.1187			6.56112	1.88571e-11	18.8571			-6.56272	-1.38647e-11	-13.8647			6.562	1.37382e-11	13.7382			-6.56128	-1.44607e-11	-14.4607
				3.43824	1.60354e-11								6.55912	1.21683e-11	12.1683			6.56024	3.15028e-11	31.5028			-6.55952	-1.51402e-11	-15.1402			6.5588	1.71762e-11	17.1762			-6.5604	-1.65731e-11	-16.5731			6.55968	1.48636e-11	14.8636			-6.55896	-1.53703e-11	-15.3703
				3.44056	1.44559e-11								6.5568	1.18261e-11	11.8261			6.55792	3.15124e-11	31.5124			-6.5572	-1.40101e-11	-14.0101			6.55648	1.57124e-11	15.7124			-6.55808	-1.57577e-11	-15.7577			6.55736	1.22565e-11	12.2565			-6.55664	-1.72395e-11	-17.2395
				3.44288	1.81657e-11								6.55448	1.20812e-11	12.0812			6.5556	2.89017e-11	28.9017			-6.55488	-1.26523e-11	-12.6523			6.55416	1.83099e-11	18.3099			-6.55576	-1.5561e-11	-15.561			6.55504	1.39373e-11	13.9373			-6.55432	-1.7559e-11	-17.559
				3.4452	1.59067e-11								6.55216	1.18178e-11	11.8178			6.55328	3.09032e-11	30.9032			-6.55256	-1.28895e-11	-12.8895			6.55184	1.75911e-11	17.5911			-6.55344	-1.42461e-11	-14.2461			6.55272	1.49697e-11	14.9697			-6.552	-1.85138e-11	-18.5138
				3.44752	1.73312e-11								6.54984	1.17725e-11	11.7725			6.55096	3.33243e-11	33.3243			-6.55024	-1.44094e-11	-14.4094			6.54952	1.76459e-11	17.6459			-6.55112	-1.40828e-11	-14.0828			6.5504	1.32745e-11	13.2745			-6.54968	-1.68127e-11	-16.8127
				3.44984	1.5909e-11								6.54752	1.07378e-11	10.7378			6.54864	3.46774e-11	34.6774			-6.54792	-1.21039e-11	-12.1039			6.5472	1.79249e-11	17.9249			-6.5488	-1.6895e-11	-16.895			6.54808	1.365e-11	13.65			-6.54736	-1.69844e-11	-16.9844
				3.45216	1.7305e-11								6.5452	1.20908e-11	12.0908			6.54632	3.42375e-11	34.2375			-6.5456	-1.14829e-11	-11.4829			6.54488	1.70678e-11	17.0678			-6.54648	-1.5797e-11	-15.797			6.54576	1.30099e-11	13.0099			-6.54504	-1.68234e-11	-16.8234
				3.45448	1.46478e-11								6.54288	1.31482e-11	13.1482			6.544	3.30859e-11	33.0859			-6.54328	-1.33664e-11	-13.3664			6.54256	1.68603e-11	16.8603			-6.54416	-1.6132e-11	-16.132			6.54344	1.51843e-11	15.1843			-6.54272	-1.55217e-11	-15.5217
				3.4568	1.54203e-11								6.54056	1.25867e-11	12.5867			6.54168	3.29059e-11	32.9059			-6.54096	-1.17165e-11	-11.7165			6.54024	1.65516e-11	16.5516			-6.54184	-1.59067e-11	-15.9067			6.54112	1.45358e-11	14.5358			-6.5404	-1.60212e-11	-16.0212
				3.45912	1.74492e-11								6.53824	1.15984e-11	11.5984			6.53936	3.42542e-11	34.2542			-6.53864	-1.26201e-11	-12.6201			6.53792	1.76161e-11	17.6161			-6.53952	-1.44178e-11	-14.4178			6.5388	1.27464e-11	12.7464			-6.53808	-1.70535e-11	-17.0535
				3.46144	1.69092e-11								6.53592	1.06686e-11	10.6686			6.53704	3.3645e-11	33.645			-6.53632	-1.31768e-11	-13.1768			6.5356	1.92481e-11	19.2481			-6.5372	-1.4661e-11	-14.661			6.53648	1.38682e-11	13.8682			-6.53576	-1.77974e-11	-17.7974
				3.46376	2.04617e-11								6.5336	1.0218e-11	10.218			6.53472	3.15326e-11	31.5326			-6.534	-1.38194e-11	-13.8194			6.53328	1.96689e-11	19.6689			-6.53488	-1.42247e-11	-14.2247			6.53416	1.40375e-11	14.0375			-6.53344	-1.85281e-11	-18.5281
				3.46608	1.82682e-11								6.53128	1.20049e-11	12.0049			6.5324	3.26317e-11	32.6317			-6.53168	-1.31971e-11	-13.1971			6.53096	1.86985e-11	18.6985			-6.53256	-1.51497e-11	-15.1497			6.53184	1.4593e-11	14.593			-6.53112	-1.91492e-11	-19.1492
				3.4684	1.77854e-11								6.52896	1.2092e-11	12.092			6.53008	3.24303e-11	32.4303			-6.52936	-1.47206e-11	-14.7206			6.52864	1.78772e-11	17.8772			-6.53024	-1.62739e-11	-16.2739			6.52952	1.5276e-11	15.276			-6.5288	-1.87248e-11	-18.7248
				3.47072	1.79392e-11								6.52664	1.3687e-11	13.687			6.52776	3.26138e-11	32.6138			-6.52704	-1.52189e-11	-15.2189			6.52632	1.82515e-11	18.2515			-6.52792	-1.64277e-11	-16.4277			6.5272	1.52892e-11	15.2892			-6.52648	-1.6895e-11	-16.895
				3.47304	1.64991e-11								6.52432	1.20145e-11	12.0145			6.52544	3.25733e-11	32.5733			-6.52472	-1.40137e-11	-14.0137			6.524	1.75649e-11	17.5649			-6.5256	-1.48815e-11	-14.8815			6.52488	1.21945e-11	12.1945			-6.52416	-1.57506e-11	-15.7506
				3.47536	1.63382e-11								6.522	1.31327e-11	13.1327			6.52312	3.23361e-11	32.3361			-6.5224	-1.4506e-11	-14.506			6.52168	1.95247e-11	19.5247			-6.52328	-1.5083e-11	-15.083			6.52256	1.36834e-11	13.6834			-6.52184	-1.62226e-11	-16.2226
				3.47768	1.57183e-11								6.51968	1.14327e-11	11.4327			6.5208	3.4005e-11	34.005			-6.52008	-1.29468e-11	-12.9468			6.51936	1.86163e-11	18.6163			-6.52096	-1.38599e-11	-13.8599			6.52024	1.31994e-11	13.1994			-6.51952	-1.60498e-11	-16.0498
				3.48	1.71655e-11								6.51736	1.22839e-11	12.2839			6.51848	3.37594e-11	33.7594			-6.51776	-1.44285e-11	-14.4285			6.51704	1.79201e-11	17.9201			-6.51864	-1.42664e-11	-14.2664			6.51792	1.3079e-11	13.079			-6.5172	-1.51319e-11	-15.1319
				3.48232	1.69748e-11								6.51504	1.13874e-11	11.3874			6.51616	3.17663e-11	31.7663			-6.51544	-1.4444e-11	-14.444			6.51472	1.84697e-11	18.4697			-6.51632	-1.39946e-11	-13.9946			6.5156	1.27417e-11	12.7417			-6.51488	-1.62941e-11	-16.2941
				3.48464	1.58673e-11								6.51272	1.19644e-11	11.9644			6.51384	3.15481e-11	31.5481			-6.51312	-1.43665e-11	-14.3665			6.5124	1.75363e-11	17.5363			-6.514	-1.41174e-11	-14.1174			6.51328	1.37335e-11	13.7335			-6.51256	-1.6287e-11	-16.287
				3.48696	1.72657e-11								6.5104	1.44118e-11	14.4118			6.51152	2.94357e-11	29.4357			-6.5108	-1.38659e-11	-13.8659			6.51008	1.8726e-11	18.726			-6.51168	-1.35273e-11	-13.5273			6.51096	1.20371e-11	12.0371			-6.51024	-1.59711e-11	-15.9711
				3.48928	1.77675e-11								6.50808	1.05697e-11	10.5697			6.5092	3.14945e-11	31.4945			-6.50848	-1.07759e-11	-10.7759			6.50776	1.81108e-11	18.1108			-6.50936	-1.18083e-11	-11.8083			6.50864	1.31684e-11	13.1684			-6.50792	-1.73956e-11	-17.3956
				3.4916	1.62631e-11								6.50576	1.06805e-11	10.6805			6.50688	3.22348e-11	32.2348			-6.50616	-1.23579e-11	-12.3579			6.50544	1.76137e-11	17.6137			-6.50704	-1.43618e-11	-14.3618			6.50632	1.56218e-11	15.6218			-6.5056	-1.70928e-11	-17.0928
				3.49392	1.65111e-11								6.50344	1.19871e-11	11.9871			6.50456	3.35628e-11	33.5628			-6.50384	-1.3265e-11	-13.265			6.50312	1.65301e-11	16.5301			-6.50472	-1.39267e-11	-13.9267			6.504	1.54954e-11	15.4954			-6.50328	-1.78176e-11	-17.8176
				3.49624	1.53106e-11								6.50112	1.17379e-11	11.7379			6.50224	3.38524e-11	33.8524			-6.50152	-1.28514e-11	-12.8514			6.5008	1.80751e-11	18.0751			-6.5024	-1.49018e-11	-14.9018			6.50168	1.4897e-11	14.897			-6.50096	-1.86533e-11	-18.6533
				3.49856	1.5983e-11								6.4988	1.3321e-11	13.321			6.49992	3.21632e-11	32.1632			-6.4992	-1.38849e-11	-13.8849			6.49848	1.93542e-11	19.3542			-6.50008	-1.55002e-11	-15.5002			6.49936	1.49113e-11	14.9113			-6.49864	-1.82492e-11	-18.2492
				3.50088	1.59281e-11								6.49648	1.2818e-11	12.818			6.4976	3.12954e-11	31.2954			-6.49688	-1.47432e-11	-14.7432			6.49616	1.84422e-11	18.4422			-6.49776	-1.62953e-11	-16.2953			6.49704	1.35153e-11	13.5153			-6.49632	-1.59294e-11	-15.9294
				3.5032	1.63537e-11								6.49416	1.22028e-11	12.2028			6.49528	3.29977e-11	32.9977			-6.49456	-1.30457e-11	-13.0457			6.49384	1.72657e-11	17.2657			-6.49544	-1.37002e-11	-13.7002			6.49472	1.33842e-11	13.3842			-6.494	-1.50174e-11	-15.0174
				3.50552	1.58268e-11								6.49184	1.08534e-11	10.8534			6.49296	3.17985e-11	31.7985			-6.49224	-1.32901e-11	-13.2901			6.49152	1.77747e-11	17.7747			-6.49312	-1.46443e-11	-14.6443			6.4924	1.51783e-11	15.1783			-6.49168	-1.52988e-11	-15.2988
				3.50784	1.63835e-11								6.48952	1.27452e-11	12.7452			6.49064	3.02058e-11	30.2058			-6.48992	-1.29658e-11	-12.9658			6.4892	1.84411e-11	18.4411			-6.4908	-1.21016e-11	-12.1016			6.49008	1.3588e-11	13.588			-6.48936	-1.6498e-11	-16.498
				3.51016	1.67459e-11								6.4872	1.21265e-11	12.1265			6.48832	3.10045e-11	31.0045			-6.4876	-1.24949e-11	-12.4949			6.48688	1.71929e-11	17.1929			-6.48848	-1.28347e-11	-12.8347			6.48776	1.42663e-11	14.2663			-6.48704	-1.63418e-11	-16.3418
				3.51248	1.58041e-11								6.48488	1.09476e-11	10.9476			6.486	3.1957e-11	31.957			-6.48528	-1.342e-11	-13.42			6.48456	1.93423e-11	19.3423			-6.48616	-1.41412e-11	-14.1412			6.48544	1.3203e-11	13.203			-6.48472	-1.55562e-11	-15.5562
				3.5148	1.87486e-11								6.48256	9.0867e-12	9.0867			6.48368	3.1982e-11	31.982			-6.48296	-1.38897e-11	-13.8897			6.48224	1.95139e-11	19.5139			-6.48384	-1.40578e-11	-14.0578			6.48312	1.27929e-11	12.7929			-6.4824	-1.60176e-11	-16.0176
				3.51712	1.72347e-11								6.48024	1.28489e-11	12.8489			6.48136	3.29309e-11	32.9309			-6.48064	-1.34355e-11	-13.4355			6.47992	1.75541e-11	17.5541			-6.48152	-1.36787e-11	-13.6787			6.4808	1.36643e-11	13.6643			-6.48008	-1.75995e-11	-17.5995
				3.51944	1.78057e-11								6.47792	1.0212e-11	10.212			6.47904	3.16137e-11	31.6137			-6.47832	-1.34594e-11	-13.4594			6.4776	1.67054e-11	16.7054			-6.4792	-1.42938e-11	-14.2938			6.47848	1.49184e-11	14.9184			-6.47776	-1.50913e-11	-15.0913
				3.52176	1.68735e-11								6.4756	1.05899e-11	10.5899			6.47672	3.1659e-11	31.659			-6.476	-1.20253e-11	-12.0253			6.47528	1.78951e-11	17.8951			-6.47688	-1.40649e-11	-14.0649			6.47616	1.48421e-11	14.8421			-6.47544	-1.65135e-11	-16.5135
				3.52408	1.65099e-11								6.47328	1.239e-11	12.39			6.4744	3.04824e-11	30.4824			-6.47368	-1.30517e-11	-13.0517			6.47296	1.73408e-11	17.3408			-6.47456	-1.67293e-11	-16.7293			6.47384	1.50257e-11	15.0257			-6.47312	-1.77747e-11	-17.7747
				3.5264	1.764e-11								6.47096	1.33246e-11	13.3246			6.47208	3.01939e-11	30.1939			-6.47136	-1.20491e-11	-12.0491			6.47064	1.67411e-11	16.7411			-6.47224	-1.55443e-11	-15.5443			6.47152	1.53261e-11	15.3261			-6.4708	-1.43498e-11	-14.3498
				3.52872	1.75196e-11								6.46864	1.2657e-11	12.657			6.46976	3.10427e-11	31.0427			-6.46904	-1.12647e-11	-11.2647			6.46832	1.91134e-11	19.1134			-6.46992	-1.41567e-11	-14.1567			6.4692	1.47301e-11	14.7301			-6.46848	-1.56111e-11	-15.6111
				3.53104	1.68746e-11								6.46632	1.02359e-11	10.2359			6.46744	3.19069e-11	31.9069			-6.46672	-1.26809e-11	-12.6809			6.466	1.91134e-11	19.1134			-6.4676	-1.44023e-11	-14.4023			6.46688	1.46979e-11	14.6979			-6.46616	-1.64014e-11	-16.4014
				3.53336	1.80095e-11								6.464	1.1391e-11	11.391			6.46512	3.07232e-11	30.7232			-6.4644	-1.31637e-11	-13.1637			6.46368	1.80715e-11	18.0715			-6.46528	-1.5381e-11	-15.381			6.46456	1.51247e-11	15.1247			-6.46384	-1.59043e-11	-15.9043
				3.53568	1.55776e-11								6.46168	1.18094e-11	11.8094			6.4628	3.1833e-11	31.833			-6.46208	-1.36692e-11	-13.6692			6.46136	1.65552e-11	16.5552			-6.46296	-1.43451e-11	-14.3451			6.46224	1.17057e-11	11.7057			-6.46152	-1.46705e-11	-14.6705
				3.538	1.60914e-11								6.45936	1.20014e-11	12.0014			6.46048	2.97886e-11	29.7886			-6.45976	-1.32889e-11	-13.2889			6.45904	1.71703e-11	17.1703			-6.46064	-1.47504e-11	-14.7504			6.45992	1.30051e-11	13.0051			-6.4592	-1.56361e-11	-15.6361
				3.54032	1.59532e-11								6.45704	1.33139e-11	13.3139			6.45816	3.04752e-11	30.4752			-6.45744	-1.42449e-11	-14.2449			6.45672	1.63108e-11	16.3108			-6.45832	-1.50424e-11	-15.0424			6.4576	1.31947e-11	13.1947			-6.45688	-1.57815e-11	-15.7815
				3.54264	1.73944e-11								6.45472	1.27285e-11	12.7285			6.45584	2.9934e-11	29.934			-6.45512	-1.15472e-11	-11.5472			6.4544	1.81955e-11	18.1955			-6.456	-1.48124e-11	-14.8124			6.45528	1.46228e-11	14.6228			-6.45456	-1.54227e-11	-15.4227
				3.54496	1.61165e-11								6.4524	1.16843e-11	11.6843			6.45352	3.12429e-11	31.2429			-6.4528	-1.30302e-11	-13.0302			6.45208	1.81228e-11	18.1228			-6.45368	-1.53762e-11	-15.3762			6.45296	1.46287e-11	14.6287			-6.45224	-1.57672e-11	-15.7672
				3.54728	1.55371e-11								6.45008	1.17188e-11	11.7188			6.4512	3.15135e-11	31.5135			-6.45048	-1.44702e-11	-14.4702			6.44976	1.7516e-11	17.516			-6.45136	-1.44059e-11	-14.4059			6.45064	1.33759e-11	13.3759			-6.44992	-1.53893e-11	-15.3893
				3.5496	1.71059e-11								6.44776	1.12086e-11	11.2086			6.44888	3.295e-11	32.95			-6.44816	-1.42378e-11	-14.2378			6.44744	1.81693e-11	18.1693			-6.44904	-1.41198e-11	-14.1198			6.44832	1.48636e-11	14.8636			-6.4476	-1.517e-11	-15.17
				3.55192	1.61165e-11								6.44544	1.02991e-11	10.2991			6.44656	3.42506e-11	34.2506			-6.44584	-1.23281e-11	-12.3281			6.44512	1.53821e-11	15.3821			-6.44672	-1.29599e-11	-12.9599			6.446	1.3327e-11	13.327			-6.44528	-1.44977e-11	-14.4977
				3.55424	1.72549e-11								6.44312	1.17045e-11	11.7045			6.44424	3.16709e-11	31.6709			-6.44352	-1.11443e-11	-11.1443			6.4428	1.85317e-11	18.5317			-6.4444	-1.38241e-11	-13.8241			6.44368	1.47229e-11	14.7229			-6.44296	-1.61165e-11	-16.1165
				3.55656	1.70535e-11								6.4408	1.17558e-11	11.7558			6.44192	3.11333e-11	31.1333			-6.4412	-1.15007e-11	-11.5007			6.44048	1.81252e-11	18.1252			-6.44208	-1.31518e-11	-13.1518			6.44136	1.43879e-11	14.3879			-6.44064	-1.67007e-11	-16.7007
				3.55888	1.64515e-11								6.43848	1.19775e-11	11.9775			6.4396	3.16614e-11	31.6614			-6.43888	-1.32281e-11	-13.2281			6.43816	1.58781e-11	15.8781			-6.43976	-1.35094e-11	-13.5094			6.43904	1.42878e-11	14.2878			-6.43832	-1.70344e-11	-17.0344
				3.5612	1.6517e-11								6.43616	1.02108e-11	10.2108			6.43728	3.11094e-11	31.1094			-6.43656	-1.15556e-11	-11.5556			6.43584	1.85305e-11	18.5305			-6.43744	-1.44524e-11	-14.4524			6.43672	1.3712e-11	13.712			-6.436	-1.60867e-11	-16.0867
				3.56352	1.70511e-11								6.43384	9.9307e-12	9.9307			6.43496	3.1175e-11	31.175			-6.43424	-1.30004e-11	-13.0004			6.43352	1.78414e-11	17.8414			-6.43512	-1.48374e-11	-14.8374			6.4344	1.5046e-11	15.046			-6.43368	-1.61857e-11	-16.1857
				3.56584	1.83707e-11								6.43152	1.11466e-11	11.1466			6.43264	3.28392e-11	32.8392			-6.43192	-1.25426e-11	-12.5426			6.4312	1.60759e-11	16.0759			-6.4328	-1.4723e-11	-14.723			6.43208	1.38062e-11	13.8062			-6.43136	-1.61416e-11	-16.1416
				3.56816	1.74099e-11								6.4292	9.1165e-12	9.1165			6.43032	3.133e-11	31.33			-6.4296	-1.26404e-11	-12.6404			6.42888	1.78426e-11	17.8426			-6.43048	-1.51903e-11	-15.1903			6.42976	1.21051e-11	12.1051			-6.42904	-1.54525e-11	-15.4525
				3.57048	1.74647e-11								6.42688	1.08963e-11	10.8963			6.428	2.93189e-11	29.3189			-6.42728	-1.32901e-11	-13.2901			6.42656	1.75053e-11	17.5053			-6.42816	-1.47528e-11	-14.7528			6.42744	1.53011e-11	15.3011			-6.42672	-1.55097e-11	-15.5097
				3.5728	1.80846e-11								6.42456	1.28108e-11	12.8108			6.42568	3.00139e-11	30.0139			-6.42496	-1.2359e-11	-12.359			6.42424	1.72525e-11	17.2525			-6.42584	-1.3687e-11	-13.687			6.42512	1.51163e-11	15.1163			-6.4244	-1.56552e-11	-15.6552
				3.57512	1.69307e-11								6.42224	1.31196e-11	13.1196			6.42336	2.99841e-11	29.9841			-6.42264	-1.29777e-11	-12.9777			6.42192	1.67149e-11	16.7149			-6.42352	-1.24318e-11	-12.4318			6.4228	1.38169e-11	13.8169			-6.42208	-1.51009e-11	-15.1009
				3.57744	1.62893e-11								6.41992	1.27154e-11	12.7154			6.42104	3.1175e-11	31.175			-6.42032	-1.32901e-11	-13.2901			6.4196	1.71464e-11	17.1464			-6.4212	-1.31995e-11	-13.1995			6.42048	1.30814e-11	13.0814			-6.41976	-1.46252e-11	-14.6252
				3.57976	1.60962e-11								6.4176	1.09535e-11	10.9535			6.41872	2.9338e-11	29.338			-6.418	-1.21182e-11	-12.1182			6.41728	1.80727e-11	18.0727			-6.41888	-1.24604e-11	-12.4604			6.41816	1.37084e-11	13.7084			-6.41744	-1.55741e-11	-15.5741
				3.58208	1.82479e-11								6.41528	9.25002e-12	9.25002			6.4164	3.1448e-11	31.448			-6.41568	-1.18488e-11	-11.8488			6.41496	1.88642e-11	18.8642			-6.41656	-1.40089e-11	-14.0089			6.41584	1.39826e-11	13.9826			-6.41512	-1.62858e-11	-16.2858
				3.5844	1.79404e-11								6.41296	1.08605e-11	10.8605			6.41408	3.03811e-11	30.3811			-6.41336	-1.25319e-11	-12.5319			6.41264	1.62488e-11	16.2488			-6.41424	-1.44905e-11	-14.4905			6.41352	1.35821e-11	13.5821			-6.4128	-1.59818e-11	-15.9818
				3.58672	1.82885e-11								6.41064	1.09762e-11	10.9762			6.41176	2.84451e-11	28.4451			-6.41104	-1.47492e-11	-14.7492			6.41032	1.75839e-11	17.5839			-6.41192	-1.50937e-11	-15.0937			6.4112	1.2874e-11	12.874			-6.41048	-1.54168e-11	-15.4168
				3.58904	1.82312e-11								6.40832	1.10048e-11	11.0048			6.40944	2.98851e-11	29.8851			-6.40872	-1.43093e-11	-14.3093			6.408	1.77484e-11	17.7484			-6.4096	-1.57148e-11	-15.7148			6.40888	1.2173e-11	12.173			-6.40816	-1.51712e-11	-15.1712
				3.59136	1.68985e-11								6.406	1.14482e-11	11.4482			6.40712	3.10975e-11	31.0975			-6.4064	-9.59459e-12	-9.59459			6.40568	1.84136e-11	18.4136			-6.40728	-1.41055e-11	-14.1055			6.40656	1.27381e-11	12.7381			-6.40584	-1.54919e-11	-15.4919
				3.59368	1.74671e-11								6.40368	1.15829e-11	11.5829			6.4048	3.18593e-11	31.8593			-6.40408	-1.24818e-11	-12.4818			6.40336	1.79642e-11	17.9642			-6.40496	-1.48183e-11	-14.8183			6.40424	1.38288e-11	13.8288			-6.40352	-1.64587e-11	-16.4587
				3.596	1.6101e-11								6.40136	9.6303e-12	9.6303			6.40248	3.06862e-11	30.6862			-6.40176	-1.24938e-11	-12.4938			6.40104	1.74206e-11	17.4206			-6.40264	-1.40816e-11	-14.0816			6.40192	1.65623e-11	16.5623			-6.4012	-1.41126e-11	-14.1126
				3.59832	1.69021e-11								6.39904	1.14423e-11	11.4423			6.40016	2.95776e-11	29.5776			-6.39944	-1.1006e-11	-11.006			6.39872	1.715e-11	17.15			-6.40032	-1.37002e-11	-13.7002			6.3996	1.32292e-11	13.2292			-6.39888	-1.53321e-11	-15.3321
				3.60064	1.85471e-11								6.39672	1.08212e-11	10.8212			6.39784	3.04109e-11	30.4109			-6.39712	-1.09607e-11	-10.9607			6.3964	1.74087e-11	17.4087			-6.398	-1.44977e-11	-14.4977			6.39728	1.10084e-11	11.0084			-6.39656	-1.54907e-11	-15.4907
				3.60296	1.86521e-11								6.3944	1.1056e-11	11.056			6.39552	2.90411e-11	29.0411			-6.3948	-1.22339e-11	-12.2339			6.39408	1.7448e-11	17.448			-6.39568	-1.46324e-11	-14.6324			6.39496	1.24174e-11	12.4174			-6.39424	-1.45322e-11	-14.5322
				3.60528	1.85555e-11								6.39208	1.13564e-11	11.3564			6.3932	2.89696e-11	28.9696			-6.39248	-1.24973e-11	-12.4973			6.39176	1.70916e-11	17.0916			-6.39336	-1.31351e-11	-13.1351			6.39264	1.34724e-11	13.4724			-6.39192	-1.51927e-11	-15.1927
				3.6076	1.78736e-11								6.38976	1.24103e-11	12.4103			6.39088	2.96634e-11	29.6634			-6.39016	-1.40685e-11	-14.0685			6.38944	1.64348e-11	16.4348			-6.39104	-1.34093e-11	-13.4093			6.39032	1.30301e-11	13.0301			-6.3896	-1.63692e-11	-16.3692
				3.60992	1.84756e-11								6.38744	1.12515e-11	11.2515			6.38856	3.16959e-11	31.6959			-6.38784	-1.26773e-11	-12.6773			6.38712	1.71226e-11	17.1226			-6.38872	-1.42318e-11	-14.2318			6.388	1.32626e-11	13.2626			-6.38728	-1.4785e-11	-14.785
				3.61224	1.83266e-11								6.38512	1.36035e-11	13.6035			6.38624	3.35651e-11	33.5651			-6.38552	-1.14543e-11	-11.4543			6.3848	1.66052e-11	16.6052			-6.3864	-1.28979e-11	-12.8979			6.38568	1.16533e-11	11.6533			-6.38496	-1.45191e-11	-14.5191
				3.61456	1.86151e-11								6.3828	1.14864e-11	11.4864			6.38392	2.95347e-11	29.5347			-6.3832	-1.19859e-11	-11.9859			6.38248	1.70797e-11	17.0797			-6.38408	-1.2886e-11	-12.886			6.38336	1.33532e-11	13.3532			-6.38264	-1.58745e-11	-15.8745
				3.61688	1.8515e-11								6.38048	1.11848e-11	11.1848			6.3816	3.05015e-11	30.5015			-6.38088	-1.16951e-11	-11.6951			6.38016	1.70034e-11	17.0034			-6.38176	-1.45978e-11	-14.5978			6.38104	1.37299e-11	13.7299			-6.38032	-1.4655e-11	-14.655
				3.6192	1.86783e-11								6.37816	1.08486e-11	10.8486			6.37928	3.05098e-11	30.5098			-6.37856	-1.44094e-11	-14.4094			6.37784	1.8273e-11	18.273			-6.37944	-1.48624e-11	-14.8624			6.37872	1.34092e-11	13.4092			-6.378	-1.59377e-11	-15.9377
				3.62152	1.87403e-11								6.37584	1.17367e-11	11.7367			6.37696	3.37523e-11	33.7523			-6.37624	-1.28645e-11	-12.8645			6.37552	1.73431e-11	17.3431			-6.37712	-1.3395e-11	-13.395			6.3764	1.3414e-11	13.414			-6.37568	-1.51366e-11	-15.1366
				3.62384	1.939e-11								6.37352	1.17928e-11	11.7928			6.37464	3.23492e-11	32.3492			-6.37392	-1.31148e-11	-13.1148			6.3732	1.80346e-11	18.0346			-6.3748	-1.44905e-11	-14.4905			6.37408	1.31947e-11	13.1947			-6.37336	-1.4202e-11	-14.202
				3.62616	1.72049e-11								6.3712	1.08236e-11	10.8236			6.37232	3.19439e-11	31.9439			-6.3716	-1.33819e-11	-13.3819			6.37088	1.63048e-11	16.3048			-6.37248	-1.53452e-11	-15.3452			6.37176	1.35869e-11	13.5869			-6.37104	-1.63192e-11	-16.3192
				3.62848	1.73336e-11								6.36888	1.10107e-11	11.0107			6.37	3.04955e-11	30.4955			-6.36928	-1.37145e-11	-13.7145			6.36856	1.72621e-11	17.2621			-6.37016	-1.59866e-11	-15.9866			6.36944	1.25831e-11	12.5831			-6.36872	-1.69939e-11	-16.9939
				3.6308	1.78867e-11								6.36656	1.04326e-11	10.4326			6.36768	2.81232e-11	28.1232			-6.36696	-1.44476e-11	-14.4476			6.36624	1.79976e-11	17.9976			-6.36784	-1.49137e-11	-14.9137			6.36712	1.50734e-11	15.0734			-6.3664	-1.6672e-11	-16.672
				3.63312	1.89119e-11								6.36424	1.20145e-11	12.0145			6.36536	2.95406e-11	29.5406			-6.36464	-1.29587e-11	-12.9587			6.36392	1.63358e-11	16.3358			-6.36552	-1.11765e-11	-11.1765			6.3648	1.55741e-11	15.5741			-6.36408	-1.51164e-11	-15.1164
				3.63544	1.80036e-11								6.36192	1.20812e-11	12.0812			6.36304	3.23802e-11	32.3802			-6.36232	-1.23126e-11	-12.3126			6.3616	1.69366e-11	16.9366			-6.3632	-1.3445e-11	-13.445			6.36248	1.31887e-11	13.1887			-6.36176	-1.36239e-11	-13.6239
				3.63776	1.89382e-11								6.3596	1.18738e-11	11.8738			6.36072	3.13705e-11	31.3705			-6.36	-1.34295e-11	-13.4295			6.35928	2.0054e-11	20.054			-6.36088	-1.27143e-11	-12.7143			6.36016	1.29062e-11	12.9062			-6.35944	-1.33688e-11	-13.3688
				3.64008	1.92696e-11								6.35728	1.04862e-11	10.4862			6.3584	2.96002e-11	29.6002			-6.35768	-1.22458e-11	-12.2458			6.35696	1.93518e-11	19.3518			-6.35856	-1.22661e-11	-12.2661			6.35784	1.25605e-11	12.5605			-6.35712	-1.60319e-11	-16.0319
				3.6424	1.836e-11								6.35496	1.16294e-11	11.6294			6.35608	2.9642e-11	29.642			-6.35536	-1.37145e-11	-13.7145			6.35464	1.91349e-11	19.1349			-6.35624	-1.40864e-11	-14.0864			6.35552	1.34939e-11	13.4939			-6.3548	-1.58376e-11	-15.8376
				3.64472	1.88297e-11								6.35264	1.06328e-11	10.6328			6.35376	3.00055e-11	30.0055			-6.35304	-1.3507e-11	-13.507			6.35232	1.96522e-11	19.6522			-6.35392	-1.1943e-11	-11.943			6.3532	1.34259e-11	13.4259			-6.35248	-1.68795e-11	-16.8795
				3.64704	1.97404e-11								6.35032	1.0001e-11	10.001			6.35144	3.20464e-11	32.0464			-6.35072	-1.24163e-11	-12.4163			6.35	1.73217e-11	17.3217			-6.3516	-1.28263e-11	-12.8263			6.35088	1.38837e-11	13.8837			-6.35016	-1.75399e-11	-17.5399
				3.64936	1.854e-11								6.348	1.23828e-11	12.3828			6.34912	3.16566e-11	31.6566			-6.3484	-1.2433e-11	-12.433			6.34768	1.68115e-11	16.8115			-6.34928	-1.19728e-11	-11.9728			6.34856	1.4134e-11	14.134			-6.34784	-1.71656e-11	-17.1656
				3.65168	1.66493e-11								6.34568	1.20169e-11	12.0169			6.3468	3.01999e-11	30.1999			-6.34608	-1.10466e-11	-11.0466			6.34536	1.92743e-11	19.2743			-6.34696	-1.20825e-11	-12.0825			6.34624	1.5431e-11	15.431			-6.34552	-1.51581e-11	-15.1581
				3.654	1.78748e-11								6.34336	1.22231e-11	12.2231			6.34448	3.11368e-11	31.1368			-6.34376	-1.31482e-11	-13.1482			6.34304	1.72132e-11	17.2132			-6.34464	-1.28883e-11	-12.8883			6.34392	1.39302e-11	13.9302			-6.3432	-1.59484e-11	-15.9484
				3.65632	1.87021e-11								6.34104	1.23268e-11	12.3268			6.34216	3.09616e-11	30.9616			-6.34144	-1.44929e-11	-14.4929			6.34072	1.65492e-11	16.5492			-6.34232	-1.1006e-11	-11.006			6.3416	1.2272e-11	12.272			-6.34088	-1.69164e-11	-16.9164
				3.65864	1.68878e-11								6.33872	1.14232e-11	11.4232			6.33984	2.90984e-11	29.0984			-6.33912	-1.41889e-11	-14.1889			6.3384	1.73574e-11	17.3574			-6.34	-1.13112e-11	-11.3112			6.33928	1.27667e-11	12.7667			-6.33856	-1.59413e-11	-15.9413
				3.66096	1.8484e-11								6.3364	1.10334e-11	11.0334			6.33752	2.83819e-11	28.3819			-6.3368	-1.34069e-11	-13.4069			6.33608	1.74647e-11	17.4647			-6.33768	-1.15842e-11	-11.5842			6.33696	1.19883e-11	11.9883			-6.33624	-1.70464e-11	-17.0464
				3.66328	1.76257e-11								6.33408	1.15293e-11	11.5293			6.3352	2.97969e-11	29.7969			-6.33448	-1.45382e-11	-14.5382			6.33376	1.66625e-11	16.6625			-6.33536	-1.34915e-11	-13.4915			6.33464	1.31422e-11	13.1422			-6.33392	-1.63228e-11	-16.3228
				3.6656	1.90204e-11								6.33176	1.13409e-11	11.3409			6.33288	2.79802e-11	27.9802			-6.33216	-1.31578e-11	-13.1578			6.33144	1.81466e-11	18.1466			-6.33304	-1.44333e-11	-14.4333			6.33232	1.31076e-11	13.1076			-6.3316	-1.6194e-11	-16.194
				3.66792	1.98418e-11								6.32944	1.16724e-11	11.6724			6.33056	2.73651e-11	27.3651			-6.32984	-1.43057e-11	-14.3057			6.32912	1.76984e-11	17.6984			-6.33072	-1.34343e-11	-13.4343			6.33	1.26034e-11	12.6034			-6.32928	-1.49173e-11	-14.9173
				3.67024	1.86974e-11								6.32712	1.35189e-11	13.5189			6.32824	2.89875e-11	28.9875			-6.32752	-1.20086e-11	-12.0086			6.3268	1.56504e-11	15.6504			-6.3284	-1.49745e-11	-14.9745			6.32768	1.36763e-11	13.6763			-6.32696	-1.48815e-11	-14.8815
				3.67256	1.78367e-11								6.3248	1.40768e-11	14.0768			6.32592	2.92963e-11	29.2963			-6.3252	-1.14852e-11	-11.4852			6.32448	1.72549e-11	17.2549			-6.32608	-1.25832e-11	-12.5832			6.32536	1.30957e-11	13.0957			-6.32464	-1.53226e-11	-15.3226
				3.67488	1.66887e-11								6.32248	1.37156e-11	13.7156			6.3236	2.97993e-11	29.7993			-6.32288	-1.26404e-11	-12.6404			6.32216	1.79583e-11	17.9583			-6.32376	-1.41531e-11	-14.1531			6.32304	1.47038e-11	14.7038			-6.32232	-1.65135e-11	-16.5135
				3.6772	1.74349e-11								6.32016	1.37216e-11	13.7216			6.32128	3.12143e-11	31.2143			-6.32056	-1.11944e-11	-11.1944			6.31984	1.65945e-11	16.5945			-6.32144	-1.32007e-11	-13.2007			6.32072	1.32876e-11	13.2876			-6.32	-1.53965e-11	-15.3965
				3.67952	1.86163e-11								6.31784	1.25688e-11	12.5688			6.31896	3.14623e-11	31.4623			-6.31824	-1.29444e-11	-12.9444			6.31752	1.63108e-11	16.3108			-6.31912	-1.21469e-11	-12.1469			6.3184	1.33615e-11	13.3615			-6.31768	-1.54883e-11	-15.4883
				3.68184	1.5735e-11								6.31552	1.06662e-11	10.6662			6.31664	2.98005e-11	29.8005			-6.31592	-1.26797e-11	-12.6797			6.3152	1.7882e-11	17.882			-6.3168	-1.27512e-11	-12.7512			6.31608	1.20097e-11	12.0097			-6.31536	-1.46479e-11	-14.6479
				3.68416	1.68186e-11								6.3132	1.28895e-11	12.8895			6.31432	3.22944e-11	32.2944			-6.3136	-1.2607e-11	-12.607			6.31288	1.53678e-11	15.3678			-6.31448	-1.27787e-11	-12.7787			6.31376	1.20038e-11	12.0038			-6.31304	-1.48088e-11	-14.8088
				3.68648	1.83993e-11								6.31088	1.13588e-11	11.3588			6.312	3.0784e-11	30.784			-6.31128	-1.23459e-11	-12.3459			6.31056	1.61892e-11	16.1892			-6.31216	-1.29134e-11	-12.9134			6.31144	1.16545e-11	11.6545			-6.31072	-1.4717e-11	-14.717
				3.6888	1.84303e-11								6.30856	1.24532e-11	12.4532			6.30968	2.84427e-11	28.4427			-6.30896	-1.22816e-11	-12.2816			6.30824	1.78212e-11	17.8212			-6.30984	-1.01179e-11	-10.1179			6.30912	1.26546e-11	12.6546			-6.3084	-1.74469e-11	-17.4469
				3.69112	1.93411e-11								6.30624	1.16354e-11	11.6354			6.30736	2.95394e-11	29.5394			-6.30664	-1.4419e-11	-14.419			6.30592	1.75172e-11	17.5172			-6.30752	-1.2694e-11	-12.694			6.3068	1.37049e-11	13.7049			-6.30608	-1.95712e-11	-19.5712
				3.69344	2.09218e-11								6.30392	1.10692e-11	11.0692			6.30504	2.97302e-11	29.7302			-6.30432	-1.18989e-11	-11.8989			6.3036	1.81359e-11	18.1359			-6.3052	-1.2843e-11	-12.843			6.30448	1.28406e-11	12.8406			-6.30376	-1.78892e-11	-17.8892
				3.69576	1.84804e-11								6.3016	1.14327e-11	11.4327			6.30272	3.09592e-11	30.9592			-6.302	-1.16319e-11	-11.6319			6.30128	1.78021e-11	17.8021			-6.30288	-1.32591e-11	-13.2591			6.30216	1.24055e-11	12.4055			-6.30144	-1.54668e-11	-15.4668
				3.69808	1.92696e-11								6.29928	1.01e-11	10.1			6.3004	2.91437e-11	29.1437			-6.29968	-1.12003e-11	-11.2003			6.29896	1.77282e-11	17.7282			-6.30056	-1.31017e-11	-13.1017			6.29984	1.06746e-11	10.6746			-6.29912	-1.52809e-11	-15.2809
				3.7004	1.89537e-11								6.29696	1.17379e-11	11.7379			6.29808	2.94953e-11	29.4953			-6.29736	-1.22744e-11	-12.2744			6.29664	1.6244e-11	16.244			-6.29824	-1.28955e-11	-12.8955			6.29752	1.15865e-11	11.5865			-6.2968	-1.40709e-11	-14.0709
				3.70272	1.89215e-11								6.29464	1.20836e-11	12.0836			6.29576	2.78467e-11	27.8467			-6.29504	-1.30564e-11	-13.0564			6.29432	1.64324e-11	16.4324			-6.29592	-1.21671e-11	-12.1671			6.2952	1.1937e-11	11.937			-6.29448	-1.40125e-11	-14.0125
				3.70504	1.90407e-11								6.29232	1.16497e-11	11.6497			6.29344	2.90626e-11	29.0626			-6.29272	-1.25641e-11	-12.5641			6.292	1.69962e-11	16.9962			-6.2936	-1.27226e-11	-12.7226			6.29288	1.2545e-11	12.545			-6.29216	-1.45525e-11	-14.5525
				3.70736	1.92862e-11								6.29	9.5397e-12	9.5397			6.29112	3.01367e-11	30.1367			-6.2904	-1.17106e-11	-11.7106			6.28968	1.71131e-11	17.1131			-6.29128	-1.24568e-11	-12.4568			6.29056	1.44618e-11	14.4618			-6.28984	-1.67185e-11	-16.7185
				3.70968	1.95533e-11								6.28768	8.19144e-12	8.19144			6.2888	2.80481e-11	28.0481			-6.28808	-1.11157e-11	-11.1157			6.28736	1.78641e-11	17.8641			-6.28896	-1.29587e-11	-12.9587			6.28824	1.42425e-11	14.2425			-6.28752	-1.74362e-11	-17.4362
				3.712	1.98155e-11								6.28536	6.85272e-12	6.85272			6.28648	3.08281e-11	30.8281			-6.28576	-1.2452e-11	-12.452			6.28504	1.53094e-11	15.3094			-6.28664	-1.32233e-11	-13.2233			6.28592	1.36548e-11	13.6548			-6.2852	-1.61189e-11	-16.1189
				3.71432	2.07478e-11								6.28304	1.03336e-11	10.3336			6.28416	2.74068e-11	27.4068			-6.28344	-1.32352e-11	-13.2352			6.28272	1.75196e-11	17.5196			-6.28432	-1.39493e-11	-13.9493			6.2836	1.33174e-11	13.3174			-6.28288	-1.73491e-11	-17.3491
				3.71664	2.0079e-11								6.28072	9.72328e-12	9.72328			6.28184	2.9009e-11	29.009			-6.28112	-1.20026e-11	-12.0026			6.2804	1.74993e-11	17.4993			-6.282	-1.39433e-11	-13.9433			6.28128	1.45286e-11	14.5286			-6.28056	-1.66136e-11	-16.6136
				3.71896	1.99383e-11								6.2784	9.36327e-12	9.36327			6.27952	2.9301e-11	29.301			-6.2788	-1.29253e-11	-12.9253			6.27808	1.55848e-11	15.5848			-6.27968	-1.23495e-11	-12.3495			6.27896	1.08951e-11	10.8951			-6.27824	-1.51807e-11	-15.1807
				3.72128	1.90109e-11								6.27608	1.05399e-11	10.5399			6.2772	2.9884e-11	29.884			-6.27648	-1.37955e-11	-13.7955			6.27576	1.68484e-11	16.8484			-6.27736	-1.33127e-11	-13.3127			6.27664	1.30385e-11	13.0385			-6.27592	-1.58137e-11	-15.8137
				3.7236	2.04199e-11								6.27376	1.02263e-11	10.2263			6.27488	2.76965e-11	27.6965			-6.27416	-1.27334e-11	-12.7334			6.27344	1.70547e-11	17.0547			-6.27504	-1.52236e-11	-15.2236			6.27432	1.25617e-11	12.5617			-6.2736	-1.71083e-11	-17.1083
				3.72592	1.99586e-11								6.27144	1.12146e-11	11.2146			6.27256	2.86787e-11	28.6787			-6.27184	-1.10728e-11	-11.0728			6.27112	1.61499e-11	16.1499			-6.27272	-1.30075e-11	-13.0075			6.272	1.21838e-11	12.1838			-6.27128	-1.50484e-11	-15.0484
				3.72824	1.86997e-11								6.26912	1.21385e-11	12.1385			6.27024	2.76607e-11	27.6607			-6.26952	-1.11777e-11	-11.1777			6.2688	1.70082e-11	17.0082			-6.2704	-1.2303e-11	-12.303			6.26968	1.07187e-11	10.7187			-6.26896	-1.56588e-11	-15.6588
				3.73056	1.82324e-11								6.2668	1.07628e-11	10.7628			6.26792	3.05074e-11	30.5074			-6.2672	-1.25188e-11	-12.5188			6.26648	1.7367e-11	17.367			-6.26808	-1.15758e-11	-11.5758			6.26736	1.27119e-11	12.7119			-6.26664	-1.64408e-11	-16.4408
				3.73288	1.79678e-11								6.26448	1.07032e-11	10.7032			6.2656	2.90638e-11	29.0638			-6.26488	-1.04672e-11	-10.4672			6.26416	1.63501e-11	16.3501			-6.26576	-1.23412e-11	-12.3412			6.26504	1.45882e-11	14.5882			-6.26432	-1.6585e-11	-16.585
				3.7352	1.81001e-11								6.26216	1.07985e-11	10.7985			6.26328	2.92426e-11	29.2426			-6.26256	-1.24759e-11	-12.4759			6.26184	1.51449e-11	15.1449			-6.26344	-1.3215e-11	-13.215			6.26272	1.66803e-11	16.6803			-6.262	-1.45489e-11	-14.5489
				3.73752	1.87975e-11								6.25984	1.05744e-11	10.5744			6.26096	2.87765e-11	28.7765			-6.26024	-1.21862e-11	-12.1862			6.25952	1.77461e-11	17.7461			-6.26112	-1.27417e-11	-12.7417			6.2604	1.50197e-11	15.0197			-6.25968	-1.48732e-11	-14.8732
				3.73984	2.02661e-11								6.25752	1.07091e-11	10.7091			6.25864	2.73043e-11	27.3043			-6.25792	-1.02455e-11	-10.2455			6.2572	1.66827e-11	16.6827			-6.2588	-1.27e-11	-12.7			6.25808	1.34808e-11	13.4808			-6.25736	-1.38444e-11	-13.8444
				3.74216	1.98871e-11								6.2552	1.05864e-11	10.5864			6.25632	2.74485e-11	27.4485			-6.2556	-1.15782e-11	-11.5782			6.25488	1.67185e-11	16.7185			-6.25648	-1.22136e-11	-12.2136			6.25576	1.3842e-11	13.842			-6.25504	-1.49828e-11	-14.9828
				3.74448	1.9198e-11								6.25288	8.94603e-12	8.94603			6.254	2.98577e-11	29.8577			-6.25328	-1.21147e-11	-12.1147			6.25256	1.82086e-11	18.2086			-6.25416	-1.39219e-11	-13.9219			6.25344	1.31851e-11	13.1851			-6.25272	-1.58364e-11	-15.8364
				3.7468	2.06727e-11								6.25056	9.59811e-12	9.59811			6.25168	2.87729e-11	28.7729			-6.25096	-1.1161e-11	-11.161			6.25024	1.69676e-11	16.9676			-6.25184	-1.25748e-11	-12.5748			6.25112	1.30611e-11	13.0611			-6.2504	-1.67781e-11	-16.7781
[truncated: 84,590 more rows]
