# Supplementary material for: Long-distance electron transport in multicellular freshwater cable bacteria
Source: eLife. 2024 Aug 29;12:RP91097. doi: 10.7554/eLife.91097 (PMC11361709; doi:10.7554/eLife.91097)
Supplement: Figure 6—source data 4. [file elife-91097-fig6-data4.xlsx]

## Sheet: CablesonAuIDA30003
CablesonAuIDA30003Bias_Ext	CablesonAuIDA30003Cur_Ext	CablesonAuIDA30003Bias_Ret	CablesonAuIDA30003Cur_Ret	CablesonAuIDA30003Bias_Towd	CablesonAuIDA30003Cur_Towd							-9.99992	-1.34903e-11	-13.4903			9.9992	1.38074e-11	13.8074
0	1.22163e-13	-0.00440121	2.07958e-12	0	1.22163e-13							-9.99776	-1.22863e-11	-12.2863			9.99848	1.37585e-11	13.7585
				0.00231862	1.72553e-12							-9.99544	-1.16951e-11	-11.6951			9.99616	1.26618e-11	12.6618
				0.00463963	2.72367e-13							-9.99312	-9.58028e-12	-9.58028			9.99384	1.35296e-11	13.5296
				0.00695944	-1.0791e-13							-9.9908	-9.91287e-12	-9.91287			9.99152	1.30003e-11	13.0003
				0.00927925	7.09865e-13							-9.98848	-1.08487e-11	-10.8487			9.9892	1.28585e-11	12.8585
				0.0116003	7.2417e-13							-9.98616	-9.86877e-12	-9.86877			9.98688	1.42377e-11	14.2377
				0.0139189	-1.47643e-12							-9.98384	-1.05661e-11	-10.5661			9.98456	1.54298e-11	15.4298
				0.0162399	-2.73171e-12							-9.98152	-1.07092e-11	-10.7092			9.98224	1.49458e-11	14.9458
				0.0185585	-1.5321e-13							-9.9792	-1.05697e-11	-10.5697			9.97992	1.4258e-11	14.258
				0.0208795	4.01113e-13							-9.97688	-1.06532e-11	-10.6532			9.9776	1.39326e-11	13.9326
				0.0232005	-1.57978e-13							-9.97456	-1.11252e-11	-11.1252			9.97528	1.05887e-11	10.5887
				0.0255203	4.14627e-15							-9.97224	-9.60531e-12	-9.60531			9.97296	1.29288e-11	12.9288
				0.0278389	5.85888e-13							-9.96992	-1.1608e-11	-11.608			9.97064	1.28168e-11	12.8168
				0.03016	-1.00436e-12							-9.9676	-1.16807e-11	-11.6807			9.96832	1.29145e-11	12.9145
				0.0324798	-8.82771e-13							-9.96528	-1.05721e-11	-10.5721			9.966	1.3718e-11	13.718
				0.0347996	-1.67432e-12							-9.96296	-1.02216e-11	-10.2216			9.96368	1.46275e-11	14.6275
				0.0371206	-1.58491e-12							-9.96064	-9.92003e-12	-9.92003			9.96136	1.23745e-11	12.3745
				0.0394392	-3.2964e-13							-9.95832	-9.864e-12	-9.864			9.95904	1.11776e-11	11.1776
				0.0417602	-4.44081e-13							-9.956	-9.24649e-12	-9.24649			9.95672	1.28764e-11	12.8764
				0.0440788	-9.39991e-13							-9.95368	-1.03528e-11	-10.3528			9.9544	1.49709e-11	14.9709
				0.0463998	-1.78757e-12							-9.95136	-8.82807e-12	-8.82807			9.95208	1.49327e-11	14.9327
				0.0487185	-8.39855e-13							-9.94904	-8.94132e-12	-8.94132			9.94976	1.37895e-11	13.7895
				0.0510395	5.15554e-13							-9.94672	-9.68399e-12	-9.68399			9.94744	1.40542e-11	14.0542
				0.0533593	-3.21295e-13							-9.9444	-8.09255e-12	-8.09255			9.94512	1.29765e-11	12.9765
				0.0556803	-7.36143e-13							-9.94208	-9.70903e-12	-9.70903			9.9428	1.32924e-11	13.2924
				0.0580001	1.15809e-12							-9.93976	-9.23219e-12	-9.23219			9.94048	1.41209e-11	14.1209
				0.0603199	1.31068e-12							-9.93744	-8.38342e-12	-8.38342			9.93816	1.34772e-11	13.4772
				0.0626385	2.17733e-12							-9.93512	-8.61707e-12	-8.61707			9.93584	1.27357e-11	12.7357
				0.0649595	4.95289e-13							-9.9328	-8.72674e-12	-8.72674			9.93352	1.25485e-11	12.5485
				0.0672805	1.2177e-12							-9.93048	-8.91748e-12	-8.91748			9.9312	1.25211e-11	12.5211
				0.0695992	1.62695e-13							-9.92816	-8.03652e-12	-8.03652			9.92888	1.27607e-11	12.7607
				0.0719202	9.41131e-13							-9.92584	-8.70648e-12	-8.70648			9.92656	1.35106e-11	13.5106
				0.0742388	1.6099e-12							-9.92352	-9.58386e-12	-9.58386			9.92424	1.50472e-11	15.0472
				0.0765598	1.09491e-12							-9.9212	-9.47776e-12	-9.47776			9.92192	1.6002e-11	16.002
				0.0788784	-2.89109e-13							-9.91888	-8.02698e-12	-8.02698			9.9196	1.347e-11	13.47
				0.0811994	8.40165e-14							-9.91656	-9.35259e-12	-9.35259			9.91728	1.05434e-11	10.5434
				0.0835204	3.99921e-13							-9.91424	-8.13785e-12	-8.13785			9.91496	1.09464e-11	10.9464
				0.0858402	-1.41289e-13							-9.91192	-9.91049e-12	-9.91049			9.91264	1.3594e-11	13.594
				0.0881588	5.69987e-16							-9.9096	-1.0559e-11	-10.559			9.91032	1.36059e-11	13.6059
				0.0904799	1.23558e-12							-9.90728	-9.15947e-12	-9.15947			9.908	1.33174e-11	13.3174
				0.0927997	-3.48713e-13							-9.90496	-8.68621e-12	-8.68621			9.90568	1.5226e-11	15.226
				0.0951195	-6.28855e-13							-9.90264	-8.7184e-12	-8.7184			9.90336	1.32233e-11	13.2233
				0.0974405	-1.44663e-12							-9.90032	-9.73406e-12	-9.73406			9.90104	1.51664e-11	15.1664
				0.0997591	-8.68466e-13							-9.898	-1.01012e-11	-10.1012			9.89872	1.43486e-11	14.3486
				0.10208	5.89464e-13							-9.89568	-1.03039e-11	-10.3039			9.8964	1.21027e-11	12.1027
				0.104399	2.65417e-12							-9.89336	-9.88426e-12	-9.88426			9.89408	1.34402e-11	13.4402
				0.10672	2.70304e-12							-9.89104	-1.02443e-11	-10.2443			9.89176	1.24043e-11	12.4043
				0.109038	1.04282e-13							-9.88872	-8.62065e-12	-8.62065			9.88944	1.42771e-11	14.2771
				0.111361	-5.00109e-13							-9.8864	-9.25603e-12	-9.25603			9.88712	1.31291e-11	13.1291
				0.113679	1.24511e-12							-9.88408	-1.1186e-11	-11.186			9.8848	1.37168e-11	13.7168
				0.116	2.69828e-12							-9.88176	-9.23934e-12	-9.23934			9.88248	1.37633e-11	13.7633
				0.11832	2.42052e-12							-9.87944	-8.33216e-12	-8.33216			9.88016	1.39481e-11	13.9481
				0.12064	1.13306e-12							-9.87712	-1.07962e-11	-10.7962			9.87784	1.47277e-11	14.7277
				0.122958	-4.30968e-13							-9.8748	-1.13398e-11	-11.3398			9.87552	1.5015e-11	15.015
				0.125279	1.61705e-12							-9.87248	-1.05006e-11	-10.5006			9.8732	1.68961e-11	16.8961
				0.1276	7.2417e-13							-9.87016	-8.81496e-12	-8.81496			9.87088	1.52474e-11	15.2474
				0.129919	-5.19183e-13							-9.86784	-9.09152e-12	-9.09152			9.86856	1.16783e-11	11.6783
				0.13224	-6.73793e-14							-9.86552	-1.04577e-11	-10.4577			9.86624	1.26415e-11	12.6415
				0.134559	2.31836e-13							-9.8632	-1.08987e-11	-10.8987			9.86392	1.34414e-11	13.4414
				0.13688	-8.86347e-13							-9.86088	-1.07259e-11	-10.7259			9.8616	1.4134e-11	14.134
				0.139198	-9.41183e-13							-9.85856	-1.14888e-11	-11.4888			9.85928	1.23113e-11	12.3113
				0.141521	-1.51696e-12							-9.85624	-1.06949e-11	-10.6949			9.85696	1.19561e-11	11.9561
				0.14384	5.17938e-13							-9.85392	-1.15389e-11	-11.5389			9.85464	1.29431e-11	12.9431
				0.14616	1.18789e-12							-9.8516	-1.1136e-11	-11.136			9.85232	1.43426e-11	14.3426
				0.148479	2.85563e-12							-9.84928	-1.04732e-11	-10.4732			9.85	1.27572e-11	12.7572
				0.1508	1.13187e-12							-9.84696	-1.02312e-11	-10.2312			9.84768	1.34772e-11	13.4772
				0.15312	-8.57737e-13							-9.84464	-1.10239e-11	-11.0239			9.84536	1.31279e-11	13.1279
				0.155439	8.82719e-13							-9.84232	-1.15139e-11	-11.5139			9.84304	1.1056e-11	11.056
				0.15776	2.24683e-13							-9.84	-9.9546e-12	-9.9546			9.84072	1.31589e-11	13.1589
				0.160079	-5.39448e-13							-9.83768	-9.38239e-12	-9.38239			9.8384	1.39576e-11	13.9576
				0.1624	1.55387e-12							-9.83536	-1.1726e-11	-11.726			9.83608	1.17892e-11	11.7892
				0.164719	7.15826e-13							-9.83304	-1.23984e-11	-12.3984			9.83376	1.08534e-11	10.8534
				0.16704	5.04825e-13							-9.83072	-9.66134e-12	-9.66134			9.83144	1.02633e-11	10.2633
				0.169358	-2.3308e-13							-9.8284	-1.06901e-11	-10.6901			9.82912	1.21492e-11	12.1492
				0.17168	-9.7337e-13							-9.82608	-1.08379e-11	-10.8379			9.8268	1.25545e-11	12.5545
				0.173999	-2.72419e-13							-9.82376	-1.05828e-11	-10.5828			9.82448	1.28346e-11	12.8346
				0.17632	1.57926e-13							-9.82144	-7.75876e-12	-7.75876			9.82216	1.29539e-11	12.9539
				0.17864	-7.98132e-13							-9.81912	-9.08079e-12	-9.08079			9.81984	1.26415e-11	12.6415
				0.18096	-2.05102e-12							-9.8168	-8.55508e-12	-8.55508			9.81752	1.10739e-11	11.0739
				0.183278	5.60854e-13							-9.81448	-1.12945e-11	-11.2945			9.8152	1.36023e-11	13.6023
				0.185599	9.62589e-13							-9.81216	-1.13136e-11	-11.3136			9.81288	1.42413e-11	14.2413
				0.18792	1.7756e-12							-9.80984	-9.78294e-12	-9.78294			9.81056	1.30719e-11	13.0719
				0.190239	6.64566e-13							-9.80752	-1.08856e-11	-10.8856			9.80824	1.31374e-11	13.1374
				0.19256	-1.90559e-12							-9.8052	-8.91986e-12	-8.91986			9.80592	1.25569e-11	12.5569
				0.194879	6.71718e-13							-9.80288	-1.12278e-11	-11.2278			9.8036	1.29753e-11	12.9753
				0.1972	-7.93364e-13							-9.80056	-1.23698e-11	-12.3698			9.80128	1.42437e-11	14.2437
				0.199519	-1.50743e-12							-9.79824	-8.77562e-12	-8.77562			9.79896	1.20634e-11	12.0634
				0.20184	-4.6673e-13							-9.79592	-8.9294e-12	-8.9294			9.79664	1.38753e-11	13.8753
				0.20416	9.54244e-13							-9.7936	-9.57194e-12	-9.57194			9.79432	1.45656e-11	14.5656
				0.20648	-2.68843e-13							-9.79128	-9.64585e-12	-9.64585			9.792	1.43236e-11	14.3236
				0.208799	-2.70035e-13							-9.78896	-8.54078e-12	-8.54078			9.78968	1.40863e-11	14.0863
				0.21112	1.49426e-12							-9.78664	-8.58727e-12	-8.58727			9.78736	1.29229e-11	12.9229
				0.213439	1.84474e-12							-9.78432	-7.85771e-12	-7.85771			9.78504	1.29658e-11	12.9658
				0.215759	-3.49905e-13							-9.782	-1.02705e-11	-10.2705			9.78272	1.46109e-11	14.6109
				0.21808	-5.23951e-13							-9.77968	-9.8783e-12	-9.8783			9.7804	1.36691e-11	13.6691
				0.220399	1.77202e-12							-9.77736	-7.91612e-12	-7.91612			9.77808	1.4109e-11	14.109
				0.22272	1.70645e-12							-9.77504	-9.76506e-12	-9.76506			9.77576	1.2334e-11	12.334
				0.225039	1.72231e-13							-9.77272	-7.88155e-12	-7.88155			9.77344	1.21623e-11	12.1623
				0.22736	-1.28176e-13							-9.7704	-8.99377e-12	-8.99377			9.77112	1.47265e-11	14.7265
				0.229681	5.54063e-14							-9.76808	-9.84612e-12	-9.84612			9.7688	1.21361e-11	12.1361
				0.232	2.34184e-12							-9.76576	-1.17964e-11	-11.7964			9.76648	1.16235e-11	11.6235
				0.234319	1.40247e-12							-9.76344	-9.14517e-12	-9.14517			9.76416	1.23244e-11	12.3244
				0.23664	1.05438e-12							-9.76112	-1.1732e-11	-11.732			9.76184	1.37168e-11	13.7168
				0.23896	1.1271e-12							-9.7588	-1.12564e-11	-11.2564			9.75952	1.43689e-11	14.3689
				0.24128	1.23796e-12							-9.75648	-9.9689e-12	-9.9689			9.7572	1.50913e-11	15.0913
				0.243598	1.81136e-12							-9.75416	-1.04732e-11	-10.4732			9.75488	1.41638e-11	14.1638
				0.245919	-2.46193e-13							-9.75184	-1.03849e-11	-10.3849			9.75256	1.21444e-11	12.1444
				0.24824	-1.95327e-12							-9.74952	-9.95341e-12	-9.95341			9.75024	1.28752e-11	12.8752
				0.250559	6.3834e-13							-9.7472	-9.69114e-12	-9.69114			9.74792	1.30897e-11	13.0897
				0.25288	-2.05817e-12							-9.74488	-8.07944e-12	-8.07944			9.7456	1.22195e-11	12.2195
				0.255198	-1.82452e-12							-9.74256	-9.56717e-12	-9.56717			9.74328	1.13386e-11	11.3386
				0.257519	8.7199e-13							-9.74024	-9.32517e-12	-9.32517			9.74096	1.39862e-11	13.9862
				0.259839	1.39413e-12							-9.73792	-9.3514e-12	-9.3514			9.73864	1.43748e-11	14.3748
				0.26216	8.25498e-13							-9.7356	-9.65777e-12	-9.65777			9.73632	1.41066e-11	14.1066
				0.26448	5.4178e-13							-9.73328	-9.03669e-12	-9.03669			9.734	1.5195e-11	15.195
				0.2668	-4.83058e-14							-9.73096	-9.27153e-12	-9.27153			9.73168	1.44797e-11	14.4797
				0.269119	-6.33623e-13							-9.72864	-1.06877e-11	-10.6877			9.72936	1.43546e-11	14.3546
				0.27144	-6.31239e-13							-9.72632	-8.88648e-12	-8.88648			9.72704	1.19275e-11	11.9275
				0.273761	1.35276e-13							-9.724	-1.02204e-11	-10.2204			9.72472	1.20586e-11	12.0586
				0.276079	9.2921e-13							-9.72168	-1.11479e-11	-11.1479			9.7224	1.34176e-11	13.4176
				0.2784	-8.79195e-13							-9.71936	-1.22398e-11	-12.2398			9.72008	1.45334e-11	14.5334
				0.280719	4.9052e-13							-9.71704	-1.05304e-11	-10.5304			9.71776	1.29622e-11	12.9622
				0.28304	1.44539e-12							-9.71472	-7.37848e-12	-7.37848			9.71544	1.30468e-11	13.0468
				0.285358	1.65639e-12							-9.7124	-7.48935e-12	-7.48935			9.71312	1.36727e-11	13.6727
				0.287679	1.46446e-12							-9.71008	-9.6232e-12	-9.6232			9.7108	1.33329e-11	13.3329
				0.29	3.0714e-12							-9.70776	-1.01286e-11	-10.1286			9.70848	1.39636e-11	13.9636
				0.29232	1.50499e-12							-9.70544	-9.27987e-12	-9.27987			9.70616	1.20777e-11	12.0777
				0.294639	2.59695e-12							-9.70312	-9.25007e-12	-9.25007			9.70384	1.40553e-11	14.0553
				0.29696	1.93295e-12							-9.7008	-1.00845e-11	-10.0845			9.70152	1.2688e-11	12.688
				0.29928	2.68791e-13							-9.69848	-8.68859e-12	-8.68859			9.6992	1.13708e-11	11.3708
				0.3016	1.03411e-12							-9.69616	-1.11896e-11	-11.1896			9.69688	1.21933e-11	12.1933
				0.303921	8.31459e-13							-9.69384	-8.49548e-12	-8.49548			9.69456	1.12325e-11	11.2325
				0.306239	-7.83827e-13							-9.69152	-8.84595e-12	-8.84595			9.69224	1.31219e-11	13.1219
				0.30856	1.75808e-13							-9.6892	-9.11298e-12	-9.11298			9.68992	1.43784e-11	14.3784
				0.310879	1.17836e-12							-9.68688	-1.09226e-11	-10.9226			9.6876	1.31303e-11	13.1303
				0.3132	1.18789e-12							-9.68456	-8.79708e-12	-8.79708			9.68528	1.1242e-11	11.242
				0.315518	1.82805e-12							-9.68224	-1.10799e-11	-11.0799			9.68296	1.08725e-11	10.8725
				0.317841	2.87828e-12							-9.67992	-8.15931e-12	-8.15931			9.68064	1.06901e-11	10.6901
				0.320159	1.89242e-12							-9.6776	-6.97198e-12	-6.97198			9.67832	1.35964e-11	13.5964
				0.32248	-8.91115e-13							-9.67528	-7.6181e-12	-7.6181			9.676	1.26964e-11	12.6964
				0.3248	-3.24431e-12							-9.67296	-8.59323e-12	-8.59323			9.67368	1.17117e-11	11.7117
				0.32712	9.16097e-13							-9.67064	-9.10225e-12	-9.10225			9.67136	1.05637e-11	10.5637
				0.329438	-1.86589e-13							-9.66832	-8.77562e-12	-8.77562			9.66904	1.11097e-11	11.1097
				0.331759	-8.21974e-13							-9.666	-8.53601e-12	-8.53601			9.66672	1.27345e-11	12.7345
				0.33408	-1.99702e-13							-9.66368	-8.45018e-12	-8.45018			9.6644	1.18381e-11	11.8381
				0.336399	1.53479e-12							-9.66136	-9.46107e-12	-9.46107			9.66208	1.34855e-11	13.4855
				0.33872	8.80335e-13							-9.65904	-1.00929e-11	-10.0929			9.65976	1.25831e-11	12.5831
				0.341039	6.896e-13							-9.65672	-1.00941e-11	-10.0941			9.65744	1.16056e-11	11.6056
				0.34336	1.84514e-14							-9.6544	-1.0584e-11	-10.584			9.65512	1.46037e-11	14.6037
				0.345678	5.06379e-14							-9.65208	-1.0112e-11	-10.112			9.6528	1.37859e-11	13.7859
				0.348001	1.9413e-12							-9.64976	-8.75774e-12	-8.75774			9.65048	1.13243e-11	11.3243
				0.35032	1.32737e-12							-9.64744	-9.15351e-12	-9.15351			9.64816	1.28978e-11	12.8978
				0.35264	5.79927e-13							-9.64512	-8.95801e-12	-8.95801			9.64584	1.37859e-11	13.7859
				0.354959	1.04484e-12							-9.6428	-8.42991e-12	-8.42991			9.64352	1.45942e-11	14.5942
				0.35728	-4.63154e-13							-9.64048	-8.02818e-12	-8.02818			9.6412	1.17475e-11	11.7475
				0.3596	1.69215e-12							-9.63816	-9.22504e-12	-9.22504			9.63888	1.20347e-11	12.0347
				0.361919	1.47996e-12							-9.63584	-9.27034e-12	-9.27034			9.63656	1.38563e-11	13.8563
				0.36424	1.14856e-12							-9.63352	-1.03933e-11	-10.3933			9.63424	1.65707e-11	16.5707
				0.366559	2.17495e-12							-9.6312	-7.50365e-12	-7.50365			9.63192	1.34319e-11	13.4319
				0.36888	8.57685e-13							-9.62888	-7.80406e-12	-7.80406			9.6296	1.27309e-11	12.7309
				0.371199	5.27475e-13							-9.62656	-8.57177e-12	-8.57177			9.62728	1.30373e-11	13.0373
				0.37352	7.09035e-14							-9.62424	-9.63869e-12	-9.63869			9.62496	1.31398e-11	13.1398
				0.375838	8.57685e-13							-9.62192	-8.71601e-12	-8.71601			9.62264	1.29693e-11	12.9693
				0.37816	2.31561e-12							-9.6196	-9.1249e-12	-9.1249			9.62032	1.43486e-11	14.3486
				0.380479	1.39532e-12							-9.61728	-9.51472e-12	-9.51472			9.618	1.38002e-11	13.8002
				0.3828	7.1821e-13							-9.61496	-1.19287e-11	-11.9287			9.61568	1.10167e-11	11.0167
				0.38512	2.18448e-12							-9.61264	-9.33829e-12	-9.33829			9.61336	1.17188e-11	11.7188
				0.38744	1.96037e-12							-9.61032	-9.48491e-12	-9.48491			9.61104	1.13064e-11	11.3064
				0.389758	5.94232e-13							-9.608	-1.06305e-11	-10.6305			9.60872	1.23352e-11	12.3352
				0.392079	-2.20599e-12							-9.60568	-1.04004e-11	-10.4004			9.6064	1.30015e-11	13.0015
				0.3944	-1.4725e-13							-9.60336	-8.60157e-12	-8.60157			9.60408	1.30683e-11	13.0683
				0.396719	1.75414e-12							-9.60104	-7.61571e-12	-7.61571			9.60176	1.20538e-11	12.0538
				0.39904	3.44453e-12							-9.59872	-9.82704e-12	-9.82704			9.59944	1.13231e-11	11.3231
				0.401359	2.86517e-12							-9.5964	-1.01942e-11	-10.1942			9.59712	1.04099e-11	10.4099
				0.40368	3.39446e-12							-9.59408	-8.58607e-12	-8.58607			9.5948	1.32757e-11	13.2757
				0.405998	1.80897e-12							-9.59176	-8.91986e-12	-8.91986			9.59248	1.40565e-11	14.0565
				0.40832	1.66712e-12							-9.58944	-7.33795e-12	-7.33795			9.59016	1.24901e-11	12.4901
				0.41064	1.83639e-12							-9.58712	-7.41306e-12	-7.41306			9.58784	1.30397e-11	13.0397
				0.41296	3.30028e-12							-9.5848	-9.07007e-12	-9.07007			9.58552	1.24746e-11	12.4746
				0.415279	3.57089e-12							-9.58248	-7.69677e-12	-7.69677			9.5832	1.21754e-11	12.1754
				0.4176	2.02713e-12							-9.58016	-9.94506e-12	-9.94506			9.58088	1.29944e-11	12.9944
				0.419919	-1.04334e-13							-9.57784	-8.27136e-12	-8.27136			9.57856	1.15734e-11	11.5734
				0.422239	1.47161e-12							-9.57552	-7.43094e-12	-7.43094			9.57624	1.22851e-11	12.2851
				0.42456	-3.20103e-13							-9.5732	-9.5326e-12	-9.5326			9.57392	1.07449e-11	10.7449
				0.426879	1.02815e-12							-9.57088	-9.52306e-12	-9.52306			9.5716	1.08319e-11	10.8319
				0.4292	-5.07262e-13							-9.56856	-7.31292e-12	-7.31292			9.56928	9.65652e-12	9.65652
				0.431519	1.3683e-14							-9.56624	-6.36759e-12	-6.36759			9.56696	1.22756e-11	12.2756
				0.43384	5.71582e-13							-9.56392	-8.809e-12	-8.809			9.56464	1.23912e-11	12.3912
				0.436161	1.69811e-12							-9.5616	-7.05781e-12	-7.05781			9.56232	1.33234e-11	13.3234
				0.43848	1.38221e-12							-9.55928	-9.27987e-12	-9.27987			9.56	1.12289e-11	11.2289
				0.440799	1.62539e-12							-9.55696	-1.06007e-11	-10.6007			9.55768	1.12766e-11	11.2766
				0.44312	-6.14188e-14							-9.55464	-8.29044e-12	-8.29044			9.55536	1.42556e-11	14.2556
				0.44544	1.51453e-12							-9.55232	-6.68111e-12	-6.68111			9.55304	1.22052e-11	12.2052
				0.44776	8.28244e-14							-9.55	-9.25603e-12	-9.25603			9.55072	1.07604e-11	10.7604
				0.450078	9.23611e-14							-9.54768	-9.1857e-12	-9.1857			9.5484	1.03503e-11	10.3503
				0.452399	9.25634e-13							-9.54536	-1.00273e-11	-10.0273			9.54608	1.15293e-11	11.5293
				0.45472	2.3931e-12							-9.54304	-9.53498e-12	-9.53498			9.54376	1.15293e-11	11.5293
				0.457039	9.05368e-13							-9.54072	-9.42173e-12	-9.42173			9.54144	1.25617e-11	12.5617
				0.45936	2.14514e-12							-9.5384	-9.02715e-12	-9.02715			9.53912	1.46407e-11	14.6407
				0.461679	1.64208e-12							-9.53608	-9.41935e-12	-9.41935			9.5368	1.16163e-11	11.6163
				0.464	9.44708e-13							-9.53376	-8.72436e-12	-8.72436			9.53448	1.25366e-11	12.5366
				0.466319	1.12591e-12							-9.53144	-7.67651e-12	-7.67651			9.53216	1.30886e-11	13.0886
				0.46864	1.10802e-12							-9.52912	-8.48117e-12	-8.48117			9.52984	1.18166e-11	11.8166
				0.47096	1.78871e-12							-9.5268	-9.79247e-12	-9.79247			9.52752	1.44714e-11	14.4714
				0.47328	5.27475e-13							-9.52448	-9.25245e-12	-9.25245			9.5252	1.32996e-11	13.2996
				0.475599	3.02169e-13							-9.52216	-9.49207e-12	-9.49207			9.52288	1.1031e-11	11.031
				0.47792	-9.41183e-13							-9.51984	-1.08725e-11	-10.8725			9.52056	1.15996e-11	11.5996
				0.480241	7.39668e-13							-9.51752	-9.41458e-12	-9.41458			9.51824	1.12098e-11	11.2098
				0.482559	2.18091e-12							-9.5152	-1.00535e-11	-10.0535			9.51592	1.16998e-11	11.6998
				0.48488	2.02355e-12							-9.51288	-7.05543e-12	-7.05543			9.5136	1.40291e-11	14.0291
				0.487199	7.81391e-13							-9.51056	-6.54879e-12	-6.54879			9.51128	1.39969e-11	13.9969
				0.48952	2.7952e-13							-9.50824	-8.06751e-12	-8.06751			9.50896	1.39588e-11	13.9588
				0.491838	2.14872e-12							-9.50592	-7.70273e-12	-7.70273			9.50664	1.23769e-11	12.3769
				0.494159	2.57668e-12							-9.5036	-6.97556e-12	-6.97556			9.50432	1.09321e-11	10.9321
				0.49648	1.96156e-12							-9.50128	-8.97827e-12	-8.97827			9.502	1.12885e-11	11.2885
				0.4988	1.2928e-12							-9.49896	-8.96516e-12	-8.96516			9.49968	1.15245e-11	11.5245
				0.501119	2.98676e-12							-9.49664	-8.92701e-12	-8.92701			9.49736	1.185e-11	11.85
				0.50344	2.39429e-12							-9.49432	-7.37491e-12	-7.37491			9.49504	1.3234e-11	13.234
				0.50576	1.57652e-12							-9.492	-9.71976e-12	-9.71976			9.49272	1.17868e-11	11.7868
				0.50808	9.06561e-13							-9.48968	-9.14874e-12	-9.14874			9.4904	1.08582e-11	10.8582
				0.510401	2.0307e-12							-9.48736	-7.70154e-12	-7.70154			9.48808	1.12444e-11	11.2444
				0.512719	3.54466e-12							-9.48504	-8.15931e-12	-8.15931			9.48576	1.08701e-11	10.8701
				0.51504	3.3134e-12							-9.48272	-7.6026e-12	-7.6026			9.48344	1.21349e-11	12.1349
				0.517359	1.18313e-12							-9.4804	-8.86383e-12	-8.86383			9.48112	1.28537e-11	12.8537
				0.51968	9.62589e-13							-9.47808	-7.7075e-12	-7.7075			9.4788	1.24079e-11	12.4079
				0.521998	1.25823e-12							-9.47576	-8.99139e-12	-8.99139			9.47648	1.18893e-11	11.8893
				0.524319	2.22859e-12							-9.47344	-8.87337e-12	-8.87337			9.47416	1.03432e-11	10.3432
				0.526639	2.6947e-12							-9.47112	-9.4265e-12	-9.4265			9.47184	8.94842e-12	8.94842
				0.52896	1.61109e-12							-9.4688	-8.02937e-12	-8.02937			9.46952	1.22124e-11	12.2124
				0.53128	7.72254e-15							-9.46648	-5.58319e-12	-5.58319			9.4672	1.19918e-11	11.9918
				0.5336	-6.96804e-13							-9.46416	-4.78091e-12	-4.78091			9.46488	1.32483e-11	13.2483
				0.535918	-3.34408e-13							-9.46184	-8.30116e-12	-8.30116			9.46256	1.20109e-11	12.0109
				0.538239	2.04418e-13							-9.45952	-9.36094e-12	-9.36094			9.46024	1.09917e-11	10.9917
				0.54056	2.46701e-12							-9.4572	-8.55031e-12	-8.55031			9.45792	1.28573e-11	12.8573
				0.542879	2.69589e-12							-9.45488	-8.58846e-12	-8.58846			9.4556	1.38002e-11	13.8002
				0.5452	7.36091e-13							-9.45256	-9.01642e-12	-9.01642			9.45328	1.37013e-11	13.7013
				0.547519	1.13187e-12							-9.45024	-8.27136e-12	-8.27136			9.45096	1.19024e-11	11.9024
				0.54984	2.62079e-12							-9.44792	-9.0045e-12	-9.0045			9.44864	1.26165e-11	12.6165
				0.552158	1.40045e-13							-9.4456	-8.88529e-12	-8.88529			9.44632	1.21087e-11	12.1087
				0.554481	1.77321e-12							-9.44328	-9.22861e-12	-9.22861			9.444	1.07294e-11	10.7294
				0.5568	4.78599e-13							-9.44096	-1.03694e-11	-10.3694			9.44168	1.05566e-11	10.5566
				0.55912	1.53241e-12							-9.43864	-1.01429e-11	-10.1429			9.43936	1.03599e-11	10.3599
				0.561439	1.8805e-12							-9.43632	-7.97334e-12	-7.97334			9.43704	1.04207e-11	10.4207
				0.56376	6.64566e-13							-9.434	-9.98202e-12	-9.98202			9.43472	1.13982e-11	11.3982
				0.56608	2.03547e-12							-9.43168	-7.65624e-12	-7.65624			9.4324	1.29395e-11	12.9395
				0.568399	2.00448e-12							-9.42936	-7.30458e-12	-7.30458			9.43008	1.22672e-11	12.2672
				0.57072	-7.86211e-13							-9.42704	-8.45614e-12	-8.45614			9.42776	1.18476e-11	11.8476
				0.573039	-3.40369e-13							-9.42472	-1.10287e-11	-11.0287			9.42544	1.11276e-11	11.1276
				0.57536	1.7148e-12							-9.4224	-1.11407e-11	-11.1407			9.42312	1.37704e-11	13.7704
				0.577679	3.12266e-12							-9.42008	-1.02872e-11	-10.2872			9.4208	1.44237e-11	14.4237
				0.58	4.13034e-13							-9.41776	-1.03587e-11	-10.3587			9.41848	1.45e-11	14.5
				0.582318	3.06067e-12							-9.41544	-8.86741e-12	-8.86741			9.41616	1.44845e-11	14.4845
				0.584641	2.17614e-12							-9.41312	-7.1055e-12	-7.1055			9.41384	1.29419e-11	12.9419
				0.586959	1.97706e-12							-9.4108	-6.27103e-12	-6.27103			9.41152	1.21885e-11	12.1885
				0.58928	-6.33623e-13							-9.40848	-9.83062e-12	-9.83062			9.4092	1.33699e-11	13.3699
				0.5916	-1.09735e-12							-9.40616	-8.41918e-12	-8.41918			9.40688	1.22863e-11	12.2863
				0.59392	1.25346e-12							-9.40384	-8.44541e-12	-8.44541			9.40456	1.10513e-11	11.0513
				0.596238	8.00464e-13							-9.40152	-9.23338e-12	-9.23338			9.40224	1.17236e-11	11.7236
				0.598559	-4.42889e-13							-9.3992	-9.84969e-12	-9.84969			9.39992	1.07091e-11	10.7091
				0.60088	2.56953e-12							-9.39688	-8.81019e-12	-8.81019			9.3976	1.23232e-11	12.3232
				0.603199	2.10104e-12							-9.39456	-9.29656e-12	-9.29656			9.39528	1.22696e-11	12.2696
				0.60552	1.78871e-12							-9.39224	-8.27017e-12	-8.27017			9.39296	1.25473e-11	12.5473
				0.607839	-2.74803e-13							-9.38992	-7.76472e-12	-7.76472			9.39064	1.00738e-11	10.0738
				0.61016	-1.47524e-12							-9.3876	-8.55746e-12	-8.55746			9.38832	1.08307e-11	10.8307
				0.612478	1.6397e-12							-9.38528	-6.09579e-12	-6.09579			9.386	1.06877e-11	10.6877
				0.6148	1.40366e-12							-9.38296	-8.0997e-12	-8.0997			9.38368	1.06734e-11	10.6734
				0.61712	1.36671e-12							-9.38064	-7.98049e-12	-7.98049			9.38136	1.31434e-11	13.1434
				0.61944	1.95918e-12							-9.37832	-9.53021e-12	-9.53021			9.37904	1.13636e-11	11.3636
				0.621759	1.21412e-12							-9.376	-8.84237e-12	-8.84237			9.37672	1.13123e-11	11.3123
				0.62408	6.46684e-13							-9.37368	-7.02324e-12	-7.02324			9.3744	1.0435e-11	10.435
				0.6264	-8.75618e-13							-9.37136	-9.08318e-12	-9.08318			9.37208	1.08808e-11	10.8808
				0.628719	-1.96519e-12							-9.36904	-7.14603e-12	-7.14603			9.36976	1.324e-11	13.24
				0.63104	4.11842e-13							-9.36672	-7.2259e-12	-7.2259			9.36744	1.26391e-11	12.6391
				0.633359	2.58264e-12							-9.3644	-1.08904e-11	-10.8904			9.36512	1.30123e-11	13.0123
				0.63568	3.13577e-12							-9.36208	-9.59101e-12	-9.59101			9.3628	1.3234e-11	13.234
				0.637999	1.21054e-12							-9.35976	-9.3061e-12	-9.3061			9.36048	1.0255e-11	10.255
				0.64032	1.19862e-12							-9.35744	-7.41544e-12	-7.41544			9.35816	1.22136e-11	12.2136
				0.642641	1.04842e-12							-9.35512	-6.3366e-12	-6.3366			9.35584	1.39171e-11	13.9171
				0.64496	1.443e-12							-9.3528	-9.27749e-12	-9.27749			9.35352	1.36e-11	13.6
				0.647279	1.61586e-12							-9.35048	-8.80184e-12	-8.80184			9.3512	1.23614e-11	12.3614
				0.6496	2.49324e-12							-9.34816	-8.0246e-12	-8.0246			9.34888	1.18822e-11	11.8822
				0.65192	-5.72827e-13							-9.34584	-9.4563e-12	-9.4563			9.34656	1.39242e-11	13.9242
				0.65424	-1.84204e-13							-9.34352	-7.83029e-12	-7.83029			9.34424	1.30135e-11	13.0135
				0.656558	-3.63849e-14							-9.3412	-7.59783e-12	-7.59783			9.34192	1.29252e-11	12.9252
				0.658879	-8.05285e-13							-9.33888	-8.6433e-12	-8.6433			9.3396	1.1279e-11	11.279
				0.6612	1.00789e-12							-9.33656	-8.61111e-12	-8.61111			9.33728	1.06603e-11	10.6603
				0.663519	-6.85714e-14							-9.33424	-8.19507e-12	-8.19507			9.33496	1.14017e-11	11.4017
				0.66584	5.1317e-13							-9.33192	-9.21431e-12	-9.21431			9.33264	1.21861e-11	12.1861
				0.668159	1.49188e-12							-9.3296	-8.42633e-12	-8.42633			9.33032	1.29586e-11	12.9586
				0.67048	9.13713e-13							-9.32728	-7.38445e-12	-7.38445			9.328	1.16986e-11	11.6986
				0.672799	2.03786e-12							-9.32496	-9.16305e-12	-9.16305			9.32568	1.17439e-11	11.7439
				0.67512	3.4028e-12							-9.32264	-8.74939e-12	-8.74939			9.32336	1.22243e-11	12.2243
				0.67744	2.38714e-12							-9.32032	-8.51813e-12	-8.51813			9.32104	1.22124e-11	12.2124
				0.67976	2.68159e-12							-9.318	-8.76847e-12	-8.76847			9.31872	1.17749e-11	11.7749
				0.682079	4.07991e-12							-9.31568	-7.80049e-12	-7.80049			9.3164	1.36941e-11	13.6941
				0.6844	3.0261e-12							-9.31336	-6.38428e-12	-6.38428			9.31408	9.61122e-12	9.61122
				0.686719	1.17836e-12							-9.31104	-5.19099e-12	-5.19099			9.31176	1.04898e-11	10.4898
				0.689039	1.65877e-12							-9.30872	-8.74701e-12	-8.74701			9.30944	1.22612e-11	12.2612
				0.69136	2.90249e-13							-9.3064	-1.0038e-11	-10.038			9.30712	1.25009e-11	12.5009
				0.693679	2.05693e-12							-9.30408	-9.40266e-12	-9.40266			9.3048	1.12837e-11	11.2837
				0.696	7.76622e-13							-9.30176	-9.35021e-12	-9.35021			9.30248	1.32209e-11	13.2209
				0.698318	3.16677e-12							-9.29944	-8.36196e-12	-8.36196			9.30016	1.24079e-11	12.4079
				0.700639	3.21922e-12							-9.29712	-6.3211e-12	-6.3211			9.29784	1.07389e-11	10.7389
				0.70296	2.50277e-12							-9.2948	-6.98509e-12	-6.98509			9.29552	1.31494e-11	13.1494
				0.70528	2.57311e-12							-9.29248	-7.87201e-12	-7.87201			9.2932	1.36941e-11	13.6941
				0.707599	2.61364e-12							-9.29016	-8.34408e-12	-8.34408			9.29088	1.2756e-11	12.756
				0.70992	1.83162e-12							-9.28784	-9.7877e-12	-9.7877			9.28856	1.14733e-11	11.4733
				0.71224	1.35479e-12							-9.28552	-1.04887e-11	-10.4887			9.28624	1.0212e-11	10.212
				0.71456	9.69741e-13							-9.2832	-8.23083e-12	-8.23083			9.28392	1.14423e-11	11.4423
				0.716881	2.35018e-12							-9.28088	-6.7574e-12	-6.7574			9.2816	1.33055e-11	13.3055
				0.719199	1.56817e-12							-9.27856	-9.0498e-12	-9.0498			9.27928	1.09833e-11	10.9833
				0.72152	1.62062e-12							-9.27624	-7.26643e-12	-7.26643			9.27696	1.12444e-11	11.2444
				0.723839	1.80301e-12							-9.27392	-6.53568e-12	-6.53568			9.27464	1.11252e-11	11.1252
				0.72616	8.79142e-13							-9.2716	-7.63002e-12	-7.63002			9.27232	1.20681e-11	12.0681
				0.728478	1.90792e-12							-9.26928	-7.99241e-12	-7.99241			9.27	1.16569e-11	11.6569
				0.730799	2.38714e-12							-9.26696	-9.61723e-12	-9.61723			9.26768	1.02967e-11	10.2967
				0.733119	5.99001e-13							-9.26464	-9.70426e-12	-9.70426			9.26536	1.257e-11	12.57
				0.73544	2.076e-12							-9.26232	-8.29044e-12	-8.29044			9.26304	1.26296e-11	12.6296
				0.73776	1.0067e-12							-9.26	-7.13053e-12	-7.13053			9.26072	1.13219e-11	11.3219
				0.74008	2.84967e-12							-9.25768	-6.92907e-12	-6.92907			9.2584	1.29384e-11	12.9384
				0.742399	2.73762e-12							-9.25536	-9.49683e-12	-9.49683			9.25608	1.18285e-11	11.8285
				0.74472	7.86159e-13							-9.25304	-9.65538e-12	-9.65538			9.25376	1.10894e-11	11.0894
				0.747041	1.38697e-12							-9.25072	-9.64942e-12	-9.64942			9.25144	1.08105e-11	10.8105
				0.749359	1.90196e-12							-9.2484	-8.07228e-12	-8.07228			9.24912	1.13731e-11	11.3731
				0.75168	9.04176e-13							-9.24608	-7.0137e-12	-7.0137			9.2468	1.21504e-11	12.1504
				0.753999	5.68006e-13							-9.24376	-8.40965e-12	-8.40965			9.24448	1.29419e-11	12.9419
				0.75632	1.90553e-12							-9.24144	-8.22249e-12	-8.22249			9.24216	1.17713e-11	11.7713
				0.758638	2.98438e-12							-9.23912	-7.46193e-12	-7.46193			9.23984	1.01882e-11	10.1882
				0.760961	2.09388e-12							-9.2368	-8.68144e-12	-8.68144			9.23752	1.04719e-11	10.4719
				0.76328	2.0617e-12							-9.23448	-7.13291e-12	-7.13291			9.2352	1.15937e-11	11.5937
				0.7656	1.75771e-12							-9.23216	-1.04982e-11	-10.4982			9.23288	1.15937e-11	11.5937
				0.767919	1.40247e-12							-9.22984	-7.41782e-12	-7.41782			9.23056	1.36858e-11	13.6858
				0.77024	-1.99702e-13							-9.22752	-6.99582e-12	-6.99582			9.22824	1.4221e-11	14.221
				0.77256	9.006e-13							-9.2252	-8.83165e-12	-8.83165			9.22592	1.2477e-11	12.477
				0.774879	1.27015e-12							-9.22288	-9.76625e-12	-9.76625			9.2236	1.01036e-11	10.1036
				0.7772	2.31836e-13							-9.22056	-8.35719e-12	-8.35719			9.22128	1.20574e-11	12.0574
				0.779519	1.20101e-12							-9.21824	-9.17855e-12	-9.17855			9.21896	1.33425e-11	13.3425
				0.78184	3.05352e-12							-9.21592	-1.02037e-11	-10.2037			9.21664	1.1298e-11	11.298
				0.784159	2.08435e-12							-9.2136	-8.90317e-12	-8.90317			9.21432	1.03968e-11	10.3968
				0.78648	4.26147e-13							-9.21128	-8.05202e-12	-8.05202			9.212	1.20026e-11	12.0026
				0.788798	1.11518e-12							-9.20896	-8.48236e-12	-8.48236			9.20968	1.09714e-11	10.9714
				0.791121	7.19402e-13							-9.20664	-8.58369e-12	-8.58369			9.20736	1.167e-11	11.67
				0.793439	2.46343e-12							-9.20432	-7.00894e-12	-7.00894			9.20504	1.23399e-11	12.3399
				0.79576	2.21107e-13							-9.202	-1.01072e-11	-10.1072			9.20272	1.28883e-11	12.8883
				0.79808	-7.21477e-14							-9.19968	-1.01453e-11	-10.1453			9.2004	1.15174e-11	11.5174
				0.8004	2.47333e-13							-9.19736	-8.54435e-12	-8.54435			9.19808	1.14232e-11	11.4232
				0.802718	-3.45137e-13							-9.19504	-9.01165e-12	-9.01165			9.19576	1.23661e-11	12.3661
				0.805039	1.37386e-12							-9.19272	-7.99599e-12	-7.99599			9.19344	1.15937e-11	11.5937
				0.80736	3.50413e-12							-9.1904	-9.00212e-12	-9.00212			9.19112	1.23375e-11	12.3375
				0.809679	2.88901e-12							-9.18808	-7.3606e-12	-7.3606			9.1888	1.28847e-11	12.8847
				0.812	1.04604e-12							-9.18576	-8.06871e-12	-8.06871			9.18648	1.22446e-11	12.2446
				0.814319	1.50618e-12							-9.18344	-7.47385e-12	-7.47385			9.18416	1.23113e-11	12.3113
				0.81664	6.91984e-13							-9.18112	-6.94218e-12	-6.94218			9.18184	1.29038e-11	12.9038
				0.818958	3.09644e-12							-9.1788	-7.05662e-12	-7.05662			9.17952	1.29014e-11	12.9014
				0.82128	6.69334e-13							-9.17648	-9.97248e-12	-9.97248			9.1772	1.20574e-11	12.0574
				0.8236	-9.39991e-13							-9.17416	-8.1748e-12	-8.1748			9.17488	1.02335e-11	10.2335
				0.82592	-9.03036e-13							-9.17184	-6.1852e-12	-6.1852			9.17256	1.05637e-11	10.5637
				0.828239	-1.62747e-13							-9.16952	-7.22351e-12	-7.22351			9.17024	1.13159e-11	11.3159
				0.83056	-1.23408e-13							-9.1672	-7.40352e-12	-7.40352			9.16792	1.11824e-11	11.1824
				0.83288	2.19915e-13							-9.16488	-8.5372e-12	-8.5372			9.1656	1.19167e-11	11.9167
				0.835199	1.7601e-12							-9.16256	-7.6479e-12	-7.6479			9.16328	1.23888e-11	12.3888
				0.83752	8.99408e-13							-9.16024	-9.75671e-12	-9.75671			9.16096	9.7209e-12	9.7209
				0.839839	1.08418e-12							-9.15792	-8.61707e-12	-8.61707			9.15864	1.15531e-11	11.5531
				0.84216	1.45373e-12							-9.1556	-8.56819e-12	-8.56819			9.15632	1.19167e-11	11.9167
				0.844479	1.9866e-12							-9.15328	-8.57773e-12	-8.57773			9.154	1.33365e-11	13.3365
				0.8468	1.5336e-12							-9.15096	-8.29163e-12	-8.29163			9.15168	1.39564e-11	13.9564
				0.849118	1.96037e-12							-9.14864	-1.01632e-11	-10.1632			9.14936	1.18583e-11	11.8583
				0.85144	1.71242e-12							-9.14632	-1.02431e-11	-10.2431			9.14704	1.09392e-11	10.9392
				0.853759	1.53241e-12							-9.144	-7.32484e-12	-7.32484			9.14472	9.70182e-12	9.70182
				0.85608	2.10461e-12							-9.14168	-7.25689e-12	-7.25689			9.1424	9.19041e-12	9.19041
				0.8584	2.82225e-12							-9.13936	-7.32484e-12	-7.32484			9.14008	8.99372e-12	8.99372
				0.86072	2.62079e-12							-9.13704	-7.27239e-12	-7.27239			9.13776	1.01346e-11	10.1346
				0.863038	4.64258e-12							-9.13472	-9.22027e-12	-9.22027			9.13544	1.24866e-11	12.4866
				0.865359	4.00839e-12							-9.1324	-7.43451e-12	-7.43451			9.13312	1.26022e-11	12.6022
				0.86768	3.55062e-12							-9.13008	-9.2906e-12	-9.2906			9.1308	1.25688e-11	12.5688
				0.869999	2.31561e-12							-9.12776	-8.81138e-12	-8.81138			9.12848	1.22028e-11	12.2028
				0.87232	9.36363e-13							-9.12544	-7.45955e-12	-7.45955			9.12616	1.19418e-11	11.9418
				0.874639	1.57652e-12							-9.12312	-9.75552e-12	-9.75552			9.12384	1.03658e-11	10.3658
				0.87696	1.2928e-12							-9.1208	-6.77052e-12	-6.77052			9.12152	1.17355e-11	11.7355
				0.879279	2.53854e-12							-9.11848	-5.07298e-12	-5.07298			9.1192	1.02681e-11	10.2681
				0.8816	3.51963e-12							-9.11616	-6.59886e-12	-6.59886			9.11688	1.22887e-11	12.2887
				0.88392	1.93295e-12							-9.11384	-4.63429e-12	-4.63429			9.11456	1.20049e-11	12.0049
				0.88624	2.00925e-12							-9.11152	-6.41527e-12	-6.41527			9.11224	1.21242e-11	12.1242
				0.888559	2.58062e-13							-9.1092	-6.97079e-12	-6.97079			9.10992	1.11264e-11	11.1264
				0.89088	2.53734e-12							-9.10688	-7.91373e-12	-7.91373			9.1076	1.09511e-11	10.9511
				0.893199	1.62062e-12							-9.10456	-1.05459e-11	-10.5459			9.10528	1.12015e-11	11.2015
				0.895519	-1.67515e-13							-9.10224	-8.10089e-12	-8.10089			9.10296	1.02061e-11	10.2061
				0.89784	5.31051e-13							-9.09992	-7.06496e-12	-7.06496			9.10064	1.0454e-11	10.454
				0.900159	1.35479e-12							-9.0976	-7.33557e-12	-7.33557			9.09832	1.01453e-11	10.1453
				0.90248	2.05097e-12							-9.09528	-7.24855e-12	-7.24855			9.096	1.15281e-11	11.5281
				0.904799	3.20968e-12							-9.09296	-8.97947e-12	-8.97947			9.09368	1.19275e-11	11.9275
				0.90712	4.47449e-12							-9.09064	-8.20818e-12	-8.20818			9.09136	1.15019e-11	11.5019
				0.909441	3.22995e-12							-9.08832	-7.02205e-12	-7.02205			9.08904	1.24365e-11	12.4365
				0.91176	1.54314e-12							-9.086	-8.42037e-12	-8.42037			9.08672	1.18035e-11	11.8035
				0.914079	2.63271e-12							-9.08368	-7.74803e-12	-7.74803			9.0844	1.02085e-11	10.2085
				0.9164	2.97723e-12							-9.08136	-8.1903e-12	-8.1903			9.08208	1.33198e-11	13.3198
				0.91872	3.24545e-12							-9.07904	-7.26047e-12	-7.26047			9.07976	1.31887e-11	13.1887
				0.92104	4.86312e-12							-9.07672	-7.65386e-12	-7.65386			9.07744	1.12492e-11	11.2492
				0.923361	3.11789e-12							-9.0744	-7.80406e-12	-7.80406			9.07512	9.4491e-12	9.4491
				0.925679	2.25839e-12							-9.07208	-8.3262e-12	-8.3262			9.0728	1.20502e-11	12.0502
				0.928	-3.60634e-13							-9.06976	-9.68638e-12	-9.68638			9.07048	1.19382e-11	11.9382
				0.930319	7.73046e-13							-9.06744	-1.03194e-11	-10.3194			9.06816	1.06269e-11	10.6269
				0.93264	1.58129e-12							-9.06512	-8.77323e-12	-8.77323			9.06584	9.73401e-12	9.73401
				0.934958	1.85547e-12							-9.0628	-8.71363e-12	-8.71363			9.06352	1.01715e-11	10.1715
				0.937279	1.44062e-12							-9.06048	-9.95221e-12	-9.95221			9.0612	1.13445e-11	11.3445
				0.939599	2.11892e-12							-9.05816	-9.20716e-12	-9.20716			9.05888	1.05983e-11	10.5983
				0.94192	3.22518e-12							-9.05584	-7.23782e-12	-7.23782			9.05656	1.20026e-11	12.0026
				0.94424	1.22723e-12							-9.05352	-7.45716e-12	-7.45716			9.05424	1.25664e-11	12.5664
				0.94656	-4.05934e-13							-9.0512	-7.86605e-12	-7.86605			9.05192	9.67202e-12	9.67202
				0.948879	1.96633e-12							-9.04888	-8.96278e-12	-8.96278			9.0496	1.16962e-11	11.6962
				0.9512	2.57072e-12							-9.04656	-8.59442e-12	-8.59442			9.04728	1.16819e-11	11.6819
				0.953521	4.14905e-12							-9.04424	-8.92582e-12	-8.92582			9.04496	1.10596e-11	11.0596
				0.955839	2.68993e-12							-9.04192	-9.34901e-12	-9.34901			9.04264	1.20622e-11	12.0622
				0.95816	2.95338e-12							-9.0396	-8.61707e-12	-8.61707			9.04032	1.14268e-11	11.4268
				0.960479	3.50532e-12							-9.03728	-8.4013e-12	-8.4013			9.038	1.11919e-11	11.1919
				0.9628	3.87249e-12							-9.03496	-8.87456e-12	-8.87456			9.03568	1.23518e-11	12.3518
				0.965118	-1.01867e-12							-9.03264	-8.30951e-12	-8.30951			9.03336	8.57172e-12	8.57172
				0.967439	1.30949e-12							-9.03032	-9.26557e-12	-9.26557			9.03104	1.02406e-11	10.2406
				0.96976	1.81768e-13							-9.028	-6.51541e-12	-6.51541			9.02872	1.08272e-11	10.8272
				0.97208	1.11518e-12							-9.02568	-5.17907e-12	-5.17907			9.0264	1.26606e-11	12.6606
				0.974399	8.80335e-13							-9.02336	-7.05781e-12	-7.05781			9.02408	1.20038e-11	12.0038
				0.97672	2.23455e-12							-9.02104	-7.07093e-12	-7.07093			9.02176	1.43784e-11	14.3784
				0.97904	1.5634e-12							-9.01872	-6.29606e-12	-6.29606			9.01944	1.31625e-11	13.1625
				0.981359	2.97603e-12							-9.0164	-7.27e-12	-7.27			9.01712	1.12062e-11	11.2062
				0.98368	1.94368e-12							-9.01408	-7.06496e-12	-7.06496			9.0148	1.19012e-11	11.9012
				0.985999	2.55761e-12							-9.01176	-7.22828e-12	-7.22828			9.01248	1.33997e-11	13.3997
				0.98832	4.66285e-12							-9.00944	-9.3669e-12	-9.3669			9.01016	1.31541e-11	13.1541
				0.990639	4.71649e-12							-9.00712	-9.44319e-12	-9.44319			9.00784	9.81149e-12	9.81149
				0.99296	1.88646e-12							-9.0048	-8.6576e-12	-8.6576			9.00552	1.18881e-11	11.8881
				0.995278	2.14991e-12							-9.00248	-7.38802e-12	-7.38802			9.0032	1.07652e-11	10.7652
				0.997601	1.36552e-12							-9.00016	-6.73118e-12	-6.73118			9.00088	1.0342e-11	10.342
				0.999919	3.90384e-13							-8.99784	-8.68502e-12	-8.68502			8.99856	1.1664e-11	11.664
				1.00224	2.32198e-14							-8.99552	-1.00726e-11	-10.0726			8.99624	1.17165e-11	11.7165
				1.00456	2.79603e-12							-8.9932	-8.79946e-12	-8.79946			8.99392	1.14327e-11	11.4327
				1.00688	1.36075e-12							-8.99088	-8.53243e-12	-8.53243			8.9916	1.07127e-11	10.7127
				1.0092	4.17802e-13							-8.98856	-9.04265e-12	-9.04265			8.98928	1.21718e-11	12.1718
				1.01152	3.43857e-12							-8.98624	-8.37746e-12	-8.37746			8.98696	1.24198e-11	12.4198
				1.01384	2.37164e-12							-8.98392	-8.84714e-12	-8.84714			8.98464	1.32709e-11	13.2709
				1.01616	-5.56137e-13							-8.9816	-9.21788e-12	-9.21788			8.98232	1.27011e-11	12.7011
				1.01848	-2.08877e-14							-8.97928	-6.32944e-12	-6.32944			8.98	1.43712e-11	14.3712
				1.0208	1.8054e-12							-8.97696	-7.70989e-12	-7.70989			8.97768	1.28251e-11	12.8251
				1.02312	2.98319e-12							-8.97464	-7.73373e-12	-7.73373			8.97536	1.10894e-11	11.0894
				1.02544	5.62046e-13							-8.97232	-8.39176e-12	-8.39176			8.97304	1.04445e-11	10.4445
				1.02776	1.04484e-12							-8.97	-9.11298e-12	-9.11298			8.97072	1.14864e-11	11.4864
				1.03008	2.81033e-12							-8.96768	-8.50263e-12	-8.50263			8.9684	1.20979e-11	12.0979
				1.0324	1.62062e-12							-8.96536	-7.57756e-12	-7.57756			8.96608	1.08486e-11	10.8486
				1.03472	1.23677e-12							-8.96304	-5.82996e-12	-5.82996			8.96376	1.06913e-11	10.6913
				1.03704	1.94607e-12							-8.96072	-6.36282e-12	-6.36282			8.96144	1.11717e-11	11.1717
				1.03936	4.38068e-13							-8.9584	-1.00965e-11	-10.0965			8.95912	8.90312e-12	8.90312
				1.04168	2.32754e-12							-8.95608	-9.49803e-12	-9.49803			8.9568	8.27369e-12	8.27369
				1.044	2.76503e-12							-8.95376	-8.66475e-12	-8.66475			8.95448	1.10155e-11	11.0155
				1.04632	3.62334e-12							-8.95144	-7.9793e-12	-7.9793			8.95216	1.23912e-11	12.3912
				1.04864	3.79262e-12							-8.94912	-4.30765e-12	-4.30765			8.94984	1.14935e-11	11.4935
				1.05096	8.82719e-13							-8.9468	-8.18672e-12	-8.18672			8.94752	1.16783e-11	11.6783
				1.05328	1.51691e-12							-8.94448	-7.65267e-12	-7.65267			8.9452	1.33329e-11	13.3329
				1.0556	1.01385e-12							-8.94216	-9.92599e-12	-9.92599			8.94288	1.23197e-11	12.3197
				1.05792	2.27747e-12							-8.93984	-6.62866e-12	-6.62866			8.94056	1.32626e-11	13.2626
				1.06024	2.71139e-12							-8.93752	-6.62747e-12	-6.62747			8.93824	1.26618e-11	12.6618
				1.06256	6.52645e-13							-8.9352	-5.80492e-12	-5.80492			8.93592	1.1273e-11	11.273
				1.06488	3.70119e-13							-8.93288	-6.82893e-12	-6.82893			8.9336	1.08081e-11	10.8081
				1.0672	-8.16844e-14							-8.93056	-7.27716e-12	-7.27716			8.93128	1.0404e-11	10.404
				1.06952	1.77321e-12							-8.92824	-4.02036e-12	-4.02036			8.92896	1.24949e-11	12.4949
				1.07184	3.56016e-12							-8.92592	-6.70734e-12	-6.70734			8.92664	1.23602e-11	12.3602
				1.07416	2.92477e-12							-8.9236	-7.72896e-12	-7.72896			8.92432	1.015e-11	10.15
				1.07648	1.29757e-12							-8.92128	-5.72505e-12	-5.72505			8.922	9.55639e-12	9.55639
				1.0788	1.91507e-12							-8.91896	-6.06718e-12	-6.06718			8.91968	1.21933e-11	12.1933
				1.08112	1.07226e-12							-8.91664	-6.36282e-12	-6.36282			8.91736	1.16592e-11	11.6592
				1.08344	1.01623e-12							-8.91432	-5.34358e-12	-5.34358			8.91504	1.05816e-11	10.5816
				1.08576	-1.47166e-12							-8.912	-6.48322e-12	-6.48322			8.91272	1.05422e-11	10.5422
				1.08808	1.13783e-12							-8.90968	-9.30968e-12	-9.30968			8.9104	1.07997e-11	10.7997
				1.0904	1.85666e-12							-8.90736	-7.79214e-12	-7.79214			8.90808	1.06221e-11	10.6221
				1.09272	1.31187e-12							-8.90504	-5.34477e-12	-5.34477			8.90576	1.2272e-11	12.272
				1.09504	3.72228e-12							-8.90272	-6.94218e-12	-6.94218			8.90344	1.21432e-11	12.1432
				1.09736	3.16677e-12							-8.9004	-6.01831e-12	-6.01831			8.90112	1.09154e-11	10.9154
				1.09968	1.53599e-12							-8.89808	-7.13411e-12	-7.13411			8.8988	9.95931e-12	9.95931
				1.102	3.17869e-12							-8.89576	-8.91271e-12	-8.91271			8.89648	9.77454e-12	9.77454
				1.10432	1.72434e-12							-8.89344	-9.0653e-12	-9.0653			8.89416	1.13374e-11	11.3374
				1.10664	3.29551e-12							-8.89112	-6.07076e-12	-6.07076			8.89184	1.04183e-11	10.4183
				1.10896	1.98183e-12							-8.8888	-7.49412e-12	-7.49412			8.88952	1.12062e-11	11.2062
				1.11128	1.2773e-12							-8.88648	-7.24378e-12	-7.24378			8.8872	1.12861e-11	11.2861
				1.1136	1.37267e-12							-8.88416	-8.28686e-12	-8.28686			8.88488	1.06615e-11	10.6615
				1.11592	1.89242e-12							-8.88184	-8.69217e-12	-8.69217			8.88256	1.09762e-11	10.9762
				1.11824	1.5944e-12							-8.87952	-6.84324e-12	-6.84324			8.88024	1.16676e-11	11.6676
				1.12056	8.64837e-13							-8.8772	-8.59919e-12	-8.59919			8.87792	1.27905e-11	12.7905
				1.12288	3.7807e-12							-8.87488	-6.1244e-12	-6.1244			8.8756	1.32709e-11	13.2709
				1.1252	2.79364e-12							-8.87256	-5.46875e-12	-5.46875			8.87328	1.16116e-11	11.6116
				1.12752	7.09865e-13							-8.87024	-5.25537e-12	-5.25537			8.87096	1.1782e-11	11.782
				1.12984	2.02117e-12							-8.86792	-6.40931e-12	-6.40931			8.86864	1.03265e-11	10.3265
				1.13216	1.99613e-12							-8.8656	-9.26676e-12	-9.26676			8.86632	1.04123e-11	10.4123
				1.13448	2.41575e-12							-8.86328	-8.97708e-12	-8.97708			8.864	1.10668e-11	11.0668
				1.1368	4.07872e-12							-8.86096	-8.87695e-12	-8.87695			8.86168	1.03932e-11	10.3932
				1.13912	2.01878e-12							-8.85864	-7.96499e-12	-7.96499			8.85936	1.11371e-11	11.1371
				1.14144	2.0462e-12							-8.85632	-9.45153e-12	-9.45153			8.85704	1.27417e-11	12.7417
				1.14376	8.76758e-13							-8.854	-8.23083e-12	-8.23083			8.85472	1.15949e-11	11.5949
				1.14608	1.54552e-12							-8.85168	-6.29964e-12	-6.29964			8.8524	1.18512e-11	11.8512
				1.1484	3.48267e-12							-8.84936	-7.35583e-12	-7.35583			8.85008	1.28227e-11	12.8227
				1.15072	5.01332e-12							-8.84704	-7.29385e-12	-7.29385			8.84776	1.07425e-11	10.7425
				1.15304	3.48387e-12							-8.84472	-7.96261e-12	-7.96261			8.84544	9.60288e-12	9.60288
				1.15536	-2.68843e-13							-8.8424	-8.95562e-12	-8.95562			8.84312	1.06889e-11	10.6889
				1.15768	6.09729e-13							-8.84008	-5.74174e-12	-5.74174			8.8408	1.07282e-11	10.7282
				1.16	1.56221e-12							-8.83776	-6.8492e-12	-6.8492			8.83848	1.06734e-11	10.6734
				1.16232	5.28667e-13							-8.83544	-5.47233e-12	-5.47233			8.83616	1.08367e-11	10.8367
				1.16464	1.865e-12							-8.83312	-6.42719e-12	-6.42719			8.83384	1.12504e-11	11.2504
				1.16696	3.73301e-12							-8.8308	-6.69065e-12	-6.69065			8.83152	1.13517e-11	11.3517
				1.16928	3.53751e-12							-8.82848	-8.16407e-12	-8.16407			8.8292	1.1217e-11	11.217
				1.1716	1.03888e-12							-8.82616	-8.02818e-12	-8.02818			8.82688	9.72328e-12	9.72328
				1.17392	5.85888e-13							-8.82384	-6.95887e-12	-6.95887			8.82456	1.06936e-11	10.6936
				1.17624	8.2073e-13							-8.82152	-8.83761e-12	-8.83761			8.82224	9.95216e-12	9.95216
				1.17856	3.0416e-12							-8.8192	-6.41647e-12	-6.41647			8.81992	9.95455e-12	9.95455
				1.18088	2.13442e-12							-8.81688	-1.06234e-11	-10.6234			8.8176	1.10668e-11	11.0668
				1.1832	1.10802e-12							-8.81456	-9.1857e-12	-9.1857			8.81528	1.22088e-11	12.2088
				1.18552	2.14634e-12							-8.81224	-9.27987e-12	-9.27987			8.81296	1.04457e-11	10.4457
				1.18784	1.42429e-13							-8.80992	-8.84953e-12	-8.84953			8.81064	1.05267e-11	10.5267
				1.19016	-7.25415e-13							-8.8076	-7.84579e-12	-7.84579			8.80832	9.43956e-12	9.43956
				1.19248	3.03362e-13							-8.80528	-6.88615e-12	-6.88615			8.806	1.05887e-11	10.5887
				1.1948	3.17667e-13							-8.80296	-4.66528e-12	-4.66528			8.80368	1.15329e-11	11.5329
				1.19712	-1.86863e-12							-8.80064	-6.37355e-12	-6.37355			8.80136	1.10799e-11	11.0799
				1.19944	1.021e-12							-8.79832	-7.65028e-12	-7.65028			8.79904	1.14101e-11	11.4101
				1.20176	2.51827e-12							-8.796	-5.33166e-12	-5.33166			8.79672	9.39188e-12	9.39188
				1.20408	2.04501e-12							-8.79368	-5.80492e-12	-5.80492			8.7944	9.62791e-12	9.62791
				1.2064	1.17717e-12							-8.79136	-7.52988e-12	-7.52988			8.79208	1.21814e-11	12.1814
				1.20872	9.60205e-13							-8.78904	-6.69422e-12	-6.69422			8.78976	9.58023e-12	9.58023
				1.21104	-6.39584e-13							-8.78672	-5.04914e-12	-5.04914			8.78744	1.03849e-11	10.3849
				1.21336	-2.77188e-13							-8.7844	-5.37577e-12	-5.37577			8.78512	1.16783e-11	11.6783
				1.21568	-9.29262e-13							-8.78208	-7.53823e-12	-7.53823			8.7828	1.04254e-11	10.4254
				1.218	2.23491e-13							-8.77976	-6.91476e-12	-6.91476			8.78048	1.05566e-11	10.5566
				1.22032	2.19044e-12							-8.77744	-6.13036e-12	-6.13036			8.77816	1.08272e-11	10.8272
				1.22264	1.81017e-12							-8.77512	-6.52256e-12	-6.52256			8.77584	1.15889e-11	11.5889
				1.22496	3.51248e-12							-8.7728	-7.18656e-12	-7.18656			8.77352	1.10846e-11	11.0846
				1.22728	4.26707e-12							-8.77048	-7.77307e-12	-7.77307			8.7712	1.06567e-11	10.6567
				1.2296	2.30489e-12							-8.76816	-5.90506e-12	-5.90506			8.76888	1.05458e-11	10.5458
				1.23192	3.39124e-13							-8.76584	-5.53313e-12	-5.53313			8.76656	1.14804e-11	11.4804
				1.23424	1.59678e-12							-8.76352	-4.94304e-12	-4.94304			8.76424	9.93786e-12	9.93786
				1.23656	1.48473e-12							-8.7612	-5.371e-12	-5.371			8.76192	1.2384e-11	12.384
				1.23888	-4.63154e-13							-8.75888	-5.50332e-12	-5.50332			8.7596	1.05494e-11	10.5494
				1.2412	6.62182e-13							-8.75656	-7.19848e-12	-7.19848			8.75728	9.88779e-12	9.88779
				1.24352	2.44317e-12							-8.75424	-7.19013e-12	-7.19013			8.75496	1.04373e-11	10.4373
				1.24584	2.70185e-12							-8.75192	-7.17106e-12	-7.17106			8.75264	1.05136e-11	10.5136
				1.24816	1.84116e-12							-8.7496	-6.97437e-12	-6.97437			8.75032	9.25002e-12	9.25002
				1.25048	6.97944e-13							-8.74728	-6.81105e-12	-6.81105			8.748	9.01875e-12	9.01875
				1.2528	1.53956e-12							-8.74496	-1.04708e-11	-10.4708			8.74568	1.11192e-11	11.1192
				1.25512	1.68142e-12							-8.74264	-8.65879e-12	-8.65879			8.74336	9.87467e-12	9.87467
				1.25744	2.28462e-12							-8.74032	-6.88496e-12	-6.88496			8.74104	9.91163e-12	9.91163
				1.25976	1.20101e-12							-8.738	-6.00996e-12	-6.00996			8.73872	9.6446e-12	9.6446
				1.26208	9.64973e-13							-8.73568	-7.94592e-12	-7.94592			8.7364	1.10286e-11	11.0286
				1.2644	2.12488e-12							-8.73336	-7.51081e-12	-7.51081			8.73408	1.26642e-11	12.6642
				1.26672	3.3587e-12							-8.73104	-8.14262e-12	-8.14262			8.73176	1.04266e-11	10.4266
				1.26904	1.64566e-12							-8.72872	-7.74327e-12	-7.74327			8.72944	8.5443e-12	8.5443
				1.27136	2.25601e-12							-8.7264	-8.7625e-12	-8.7625			8.72712	8.13899e-12	8.13899
				1.27368	7.11057e-13							-8.72408	-6.89092e-12	-6.89092			8.7248	9.76143e-12	9.76143
				1.276	2.21309e-12							-8.72176	-7.02205e-12	-7.02205			8.72248	1.04266e-11	10.4266
				1.27832	1.55506e-12							-8.71944	-9.19285e-12	-9.19285			8.72016	1.17713e-11	11.7713
				1.28064	2.02713e-12							-8.71712	-6.23288e-12	-6.23288			8.71784	1.05482e-11	10.5482
				1.28296	3.13577e-12							-8.7148	-7.79929e-12	-7.79929			8.71552	1.10179e-11	11.0179
				1.28528	2.59218e-12							-8.71248	-7.3308e-12	-7.3308			8.7132	1.09786e-11	10.9786
				1.2876	2.40025e-12							-8.71016	-7.66816e-12	-7.66816			8.71088	1.08164e-11	10.8164
				1.28992	2.54486e-13							-8.70784	-7.02801e-12	-7.02801			8.70856	1.23173e-11	12.3173
				1.29224	2.0772e-12							-8.70552	-7.1496e-12	-7.1496			8.70624	1.17296e-11	11.7296
				1.29456	3.61976e-12							-8.7032	-9.25126e-12	-9.25126			8.70392	1.03646e-11	10.3646
				1.29688	4.2921e-12							-8.70088	-8.21176e-12	-8.21176			8.7016	8.59556e-12	8.59556
				1.2992	2.4682e-12							-8.69856	-8.03175e-12	-8.03175			8.69928	8.67424e-12	8.67424
				1.30152	3.87964e-12							-8.69624	-9.33829e-12	-9.33829			8.69696	1.0193e-11	10.193
				1.30384	3.77116e-12							-8.69392	-6.91714e-12	-6.91714			8.69464	1.11395e-11	11.1395
				1.30616	2.41337e-12							-8.6916	-6.9994e-12	-6.9994			8.69232	9.6756e-12	9.6756
				1.30848	1.54671e-12							-8.68928	-8.20699e-12	-8.20699			8.69	1.02514e-11	10.2514
				1.3108	2.47178e-12							-8.68696	-6.88973e-12	-6.88973			8.68768	8.78629e-12	8.78629
				1.31312	1.36552e-12							-8.68464	-8.03175e-12	-8.03175			8.68536	1.07091e-11	10.7091
				1.31544	2.36449e-12							-8.68232	-8.70409e-12	-8.70409			8.68304	1.1999e-11	11.999
				1.31776	1.07703e-12							-8.68	-7.23782e-12	-7.23782			8.68072	8.20336e-12	8.20336
				1.32008	1.32737e-12							-8.67768	-6.58813e-12	-6.58813			8.6784	1.07938e-11	10.7938
				1.3224	1.64447e-12							-8.67536	-7.66936e-12	-7.66936			8.67608	1.02192e-11	10.2192
				1.32472	2.48608e-12							-8.67304	-8.28448e-12	-8.28448			8.67376	1.14363e-11	11.4363
				1.32704	5.28667e-13							-8.67072	-8.31785e-12	-8.31785			8.67144	9.56473e-12	9.56473
				1.32936	2.28224e-12							-8.6684	-7.26404e-12	-7.26404			8.66912	8.58722e-12	8.58722
				1.33168	2.8306e-12							-8.66608	-8.79946e-12	-8.79946			8.6668	1.02836e-11	10.2836
				1.334	2.71258e-12							-8.66376	-8.70409e-12	-8.70409			8.66448	1.15174e-11	11.5174
				1.33632	2.67682e-12							-8.66144	-8.28805e-12	-8.28805			8.66216	1.18178e-11	11.8178
				1.33864	4.85752e-13							-8.65912	-8.33097e-12	-8.33097			8.65984	1.2328e-11	12.328
				1.34096	1.37625e-12							-8.6568	-6.32587e-12	-6.32587			8.65752	1.21361e-11	12.1361
				1.34328	6.1569e-13							-8.65448	-7.7385e-12	-7.7385			8.6552	1.09023e-11	10.9023
				1.3456	2.70066e-12							-8.65216	-8.93536e-12	-8.93536			8.65288	1.01071e-11	10.1071
				1.34792	2.20356e-12							-8.64984	-9.92837e-12	-9.92837			8.65056	1.12957e-11	11.2957
				1.35024	2.58145e-12							-8.64752	-1.03635e-11	-10.3635			8.64824	9.63626e-12	9.63626
				1.35256	4.00004e-12							-8.6452	-8.16765e-12	-8.16765			8.64592	1.11872e-11	11.1872
				1.35488	3.61142e-12							-8.64288	-7.96142e-12	-7.96142			8.6436	1.14757e-11	11.4757
				1.3572	3.19061e-12							-8.64056	-4.77019e-12	-4.77019			8.64128	1.25879e-11	12.5879
				1.35952	3.5387e-12							-8.63824	-6.38428e-12	-6.38428			8.63896	1.21873e-11	12.1873
				1.36184	2.65894e-12							-8.63592	-7.49293e-12	-7.49293			8.63664	8.81133e-12	8.81133
				1.36416	4.1661e-13							-8.6336	-6.49753e-12	-6.49753			8.63432	9.2083e-12	9.2083
				1.36648	2.25124e-12							-8.63128	-6.70257e-12	-6.70257			8.632	8.31065e-12	8.31065
				1.3688	6.34763e-13							-8.62896	-7.7683e-12	-7.7683			8.62968	1.01417e-11	10.1417
				1.37112	1.27969e-12							-8.62664	-8.51932e-12	-8.51932			8.62736	1.01202e-11	10.1202
				1.37344	1.81136e-12							-8.62432	-6.70495e-12	-6.70495			8.62504	1.08748e-11	10.8748
				1.37576	1.08061e-12							-8.622	-6.92311e-12	-6.92311			8.62272	1.00797e-11	10.0797
				1.37808	-7.11109e-13							-8.61968	-7.42855e-12	-7.42855			8.6204	1.09321e-11	10.9321
				1.3804	2.69828e-12							-8.61736	-7.18656e-12	-7.18656			8.61808	1.09821e-11	10.9821
				1.38272	3.49579e-12							-8.61504	-6.89449e-12	-6.89449			8.61576	1.3985e-11	13.985
				1.38504	2.95338e-12							-8.61272	-7.79214e-12	-7.79214			8.61344	1.02883e-11	10.2883
				1.38736	3.57446e-12							-8.6104	-6.1101e-12	-6.1101			8.61112	1.02085e-11	10.2085
				1.38968	2.73523e-12							-8.60808	-5.28636e-12	-5.28636			8.6088	1.00893e-11	10.0893
				1.392	1.4728e-12							-8.60576	-4.67839e-12	-4.67839			8.60648	9.55281e-12	9.55281
				1.39432	3.92017e-12							-8.60344	-5.8681e-12	-5.8681			8.60416	1.05613e-11	10.5613
				1.39664	3.64957e-12							-8.60112	-6.18282e-12	-6.18282			8.60184	8.72311e-12	8.72311
				1.39896	2.30369e-12							-8.5988	-7.56684e-12	-7.56684			8.59952	9.89494e-12	9.89494
				1.40128	3.17392e-12							-8.59648	-6.51779e-12	-6.51779			8.5972	1.04767e-11	10.4767
				1.4036	7.01521e-13							-8.59416	-5.64876e-12	-5.64876			8.59488	1.13767e-11	11.3767
				1.40592	1.92222e-12							-8.59184	-5.22795e-12	-5.22795			8.59256	9.09266e-12	9.09266
				1.40824	2.41813e-12							-8.58952	-7.22113e-12	-7.22113			8.59024	8.58722e-12	8.58722
				1.41056	2.7245e-12							-8.5872	-6.46534e-12	-6.46534			8.58792	1.10811e-11	11.0811
				1.41288	1.76368e-12							-8.58488	-5.8538e-12	-5.8538			8.5856	1.08796e-11	10.8796
				1.4152	2.89855e-12							-8.58256	-8.31309e-12	-8.31309			8.58328	1.18249e-11	11.8249
				1.41752	4.01554e-12							-8.58024	-7.58472e-12	-7.58472			8.58096	1.21397e-11	12.1397
				1.41984	5.43771e-12							-8.57792	-6.22931e-12	-6.22931			8.57864	1.01441e-11	10.1441
				1.42216	3.54585e-12							-8.5756	-6.94814e-12	-6.94814			8.57632	1.07807e-11	10.7807
				1.42448	1.8507e-12							-8.57328	-4.5425e-12	-4.5425			8.574	1.11252e-11	11.1252
				1.4268	8.66029e-13							-8.57096	-6.2901e-12	-6.2901			8.57168	1.03432e-11	10.3432
				1.42912	1.68142e-12							-8.56864	-7.84459e-12	-7.84459			8.56936	1.09213e-11	10.9213
				1.43144	8.79142e-13							-8.56632	-8.42633e-12	-8.42633			8.56704	9.63149e-12	9.63149
				1.43376	1.33095e-12							-8.564	-8.43826e-12	-8.43826			8.56472	9.53851e-12	9.53851
				1.43608	2.47774e-12							-8.56168	-7.2247e-12	-7.2247			8.5624	9.74951e-12	9.74951
				1.4384	2.82345e-12							-8.55936	-8.49905e-12	-8.49905			8.56008	1.01584e-11	10.1584
				1.44072	2.35972e-12							-8.55704	-6.51899e-12	-6.51899			8.55776	1.11347e-11	11.1347
				1.44304	2.62675e-12							-8.55472	-6.72522e-12	-6.72522			8.55544	1.18667e-11	11.8667
				1.44536	1.87692e-12							-8.5524	-5.42345e-12	-5.42345			8.55312	1.11657e-11	11.1657
				1.44768	2.31681e-12							-8.55008	-7.20444e-12	-7.20444			8.5508	9.14631e-12	9.14631
				1.45	2.29177e-12							-8.54776	-7.91016e-12	-7.91016			8.54848	9.22498e-12	9.22498
				1.45232	1.79348e-12							-8.54544	-6.52971e-12	-6.52971			8.54616	9.54208e-12	9.54208
				1.45464	1.55983e-12							-8.54312	-7.059e-12	-7.059			8.54384	1.00344e-11	10.0344
				1.45696	1.92342e-12							-8.5408	-6.92787e-12	-6.92787			8.54152	1.05375e-11	10.5375
				1.45928	1.22008e-12							-8.53848	-8.33693e-12	-8.33693			8.5392	7.91726e-12	7.91726
				1.4616	2.92597e-12							-8.53616	-9.48968e-12	-9.48968			8.53688	9.05213e-12	9.05213
				1.46392	7.95696e-13							-8.53384	-8.82449e-12	-8.82449			8.53456	8.62179e-12	8.62179
				1.46624	3.86891e-12							-8.53152	-9.00927e-12	-9.00927			8.53224	8.94007e-12	8.94007
				1.46856	4.55436e-12							-8.5292	-6.83727e-12	-6.83727			8.52992	9.81388e-12	9.81388
				1.47088	3.14531e-12							-8.52688	-4.77019e-12	-4.77019			8.5276	9.43718e-12	9.43718
				1.4732	2.28462e-12							-8.52456	-5.68214e-12	-5.68214			8.52528	8.92458e-12	8.92458
				1.47552	1.78192e-13							-8.52224	-7.53584e-12	-7.53584			8.52296	8.27727e-12	8.27727
				1.47784	2.66967e-12							-8.51992	-5.47114e-12	-5.47114			8.52064	9.19995e-12	9.19995
				1.48016	1.70526e-12							-8.5176	-5.29232e-12	-5.29232			8.51832	7.57513e-12	7.57513
				1.48248	1.24869e-12							-8.51528	-6.44627e-12	-6.44627			8.516	8.50138e-12	8.50138
				1.4848	1.24392e-12							-8.51296	-9.50875e-12	-9.50875			8.51368	9.37996e-12	9.37996
				1.48712	1.53599e-12							-8.51064	-5.18265e-12	-5.18265			8.51136	8.95915e-12	8.95915
				1.48944	2.65059e-12							-8.50832	-4.22778e-12	-4.22778			8.50904	9.34539e-12	9.34539
				1.49176	2.11534e-12							-8.506	-3.59001e-12	-3.59001			8.50672	8.88881e-12	8.88881
				1.49408	3.02253e-12							-8.50368	-7.44405e-12	-7.44405			8.5044	8.01859e-12	8.01859
				1.4964	1.32737e-12							-8.50136	-6.91476e-12	-6.91476			8.50208	6.73828e-12	6.73828
				1.49872	4.46257e-12							-8.49904	-8.66714e-12	-8.66714			8.49976	9.57665e-12	9.57665
				1.50104	1.95083e-12							-8.49672	-7.86724e-12	-7.86724			8.49744	9.56592e-12	9.56592
				1.50336	3.76162e-12							-8.4944	-7.06616e-12	-7.06616			8.49512	9.17015e-12	9.17015
				1.50568	2.79126e-12							-8.49208	-6.32229e-12	-6.32229			8.4928	1.0572e-11	10.572
				1.508	4.39939e-12							-8.48976	-7.24378e-12	-7.24378			8.49048	1.06579e-11	10.6579
				1.51032	2.29773e-12							-8.48744	-7.49769e-12	-7.49769			8.48816	7.9268e-12	7.9268
				1.51264	2.11892e-12							-8.48512	-8.21414e-12	-8.21414			8.48584	7.6252e-12	7.6252
				1.51496	4.73079e-12							-8.4828	-7.23543e-12	-7.23543			8.48352	8.63013e-12	8.63013
				1.51728	1.25704e-12							-8.48048	-8.8841e-12	-8.8841			8.4812	9.71017e-12	9.71017
				1.5196	3.84507e-12							-8.47816	-8.89363e-12	-8.89363			8.47888	1.05852e-11	10.5852
				1.52192	3.92971e-12							-8.47584	-7.80168e-12	-7.80168			8.47656	8.55503e-12	8.55503
				1.52424	4.47092e-12							-8.47352	-6.56786e-12	-6.56786			8.47424	1.09488e-11	10.9488
				1.52656	4.20866e-12							-8.4712	-5.04437e-12	-5.04437			8.47192	1.07175e-11	10.7175
				1.52888	3.77712e-12							-8.46888	-6.16613e-12	-6.16613			8.4696	8.94127e-12	8.94127
				1.5312	2.76503e-12							-8.46656	-8.41918e-12	-8.41918			8.46728	9.77692e-12	9.77692
				1.53352	1.9854e-12							-8.46424	-8.32858e-12	-8.32858			8.46496	9.29889e-12	9.29889
				1.53584	3.19299e-12							-8.46192	-6.10295e-12	-6.10295			8.46264	1.00416e-11	10.0416
				1.53816	3.31101e-12							-8.4596	-7.53226e-12	-7.53226			8.46032	1.13183e-11	11.3183
				1.54048	2.75907e-12							-8.45728	-7.67889e-12	-7.67889			8.458	9.77692e-12	9.77692
				1.5428	2.68993e-12							-8.45496	-5.14927e-12	-5.14927			8.45568	8.86497e-12	8.86497
				1.54512	1.43108e-12							-8.45264	-5.55339e-12	-5.55339			8.45336	1.09833e-11	10.9833
				1.54744	2.7102e-12							-8.45032	-6.31871e-12	-6.31871			8.45104	1.18953e-11	11.8953
				1.54976	3.71155e-12							-8.448	-5.44253e-12	-5.44253			8.44872	1.24877e-11	12.4877
				1.55208	1.69573e-12							-8.44568	-6.84562e-12	-6.84562			8.4464	1.1242e-11	11.242
				1.5544	3.04875e-12							-8.44336	-5.48663e-12	-5.48663			8.44408	1.01548e-11	10.1548
				1.55672	3.9762e-12							-8.44104	-8.67906e-12	-8.67906			8.44176	1.02263e-11	10.2263
				1.55904	4.56867e-12							-8.43872	-6.4868e-12	-6.4868			8.43944	1.01536e-11	10.1536
				1.56136	5.91097e-12							-8.4364	-5.49021e-12	-5.49021			8.43712	1.15269e-11	11.5269
				1.56368	5.25293e-12							-8.43408	-6.96721e-12	-6.96721			8.4348	1.10882e-11	11.0882
				1.566	1.5038e-12							-8.43176	-9.03192e-12	-9.03192			8.43248	9.62076e-12	9.62076
				1.56832	2.78768e-12							-8.42944	-6.73714e-12	-6.73714			8.43016	9.32393e-12	9.32393
				1.57064	1.36194e-12							-8.42712	-7.11146e-12	-7.11146			8.42784	9.39545e-12	9.39545
				1.57296	2.38714e-12							-8.4248	-4.57468e-12	-4.57468			8.42552	7.59063e-12	7.59063
				1.57528	1.40962e-12							-8.42248	-5.85618e-12	-5.85618			8.4232	8.35237e-12	8.35237
				1.5776	1.68261e-12							-8.42016	-6.33064e-12	-6.33064			8.42088	1.21146e-11	12.1146
				1.57992	2.72093e-12							-8.41784	-6.95887e-12	-6.95887			8.41856	9.9009e-12	9.9009
				1.58224	1.30114e-12							-8.41552	-5.93963e-12	-5.93963			8.41624	1.00273e-11	10.0273
				1.58456	2.51589e-12							-8.4132	-6.65727e-12	-6.65727			8.41392	9.4181e-12	9.4181
				1.58688	2.03905e-12							-8.41088	-6.93622e-12	-6.93622			8.4116	7.64427e-12	7.64427
				1.5892	1.73626e-12							-8.40856	-6.71568e-12	-6.71568			8.40928	1.01775e-11	10.1775
				1.59152	1.69334e-12							-8.40624	-6.55236e-12	-6.55236			8.40696	1.11621e-11	11.1621
				1.59384	2.24409e-12							-8.40392	-5.93367e-12	-5.93367			8.40464	1.05804e-11	10.5804
				1.59616	3.00703e-12							-8.4016	-6.59528e-12	-6.59528			8.40232	9.96051e-12	9.96051
				1.59848	3.02133e-12							-8.39928	-7.00298e-12	-7.00298			8.4	1.19048e-11	11.9048
				1.6008	3.01537e-12							-8.39696	-6.76098e-12	-6.76098			8.39768	9.28936e-12	9.28936
				1.60312	2.498e-12							-8.39464	-6.54402e-12	-6.54402			8.39536	9.39545e-12	9.39545
				1.60544	2.8902e-12							-8.39232	-5.27682e-12	-5.27682			8.39304	9.4944e-12	9.4944
				1.60776	3.39684e-12							-8.39	-5.64041e-12	-5.64041			8.39072	7.33909e-12	7.33909
				1.61008	3.33485e-12							-8.38768	-7.15914e-12	-7.15914			8.3884	9.74712e-12	9.74712
				1.6124	3.25379e-12							-8.38536	-6.15182e-12	-6.15182			8.38608	1.07854e-11	10.7854
				1.61472	5.72858e-12							-8.38304	-5.5212e-12	-5.5212			8.38376	1.14649e-11	11.4649
				1.61704	3.68771e-12							-8.38072	-5.30067e-12	-5.30067			8.38144	8.80894e-12	8.80894
				1.61936	1.34763e-12							-8.3784	-6.246e-12	-6.246			8.37912	9.6744e-12	9.6744
				1.62168	3.0559e-12							-8.37608	-6.0803e-12	-6.0803			8.3768	1.08713e-11	10.8713
				1.624	3.24902e-12							-8.37376	-6.47726e-12	-6.47726			8.37448	9.32989e-12	9.32989
				1.62632	1.07226e-12							-8.37144	-4.71058e-12	-4.71058			8.37216	8.51092e-12	8.51092
				1.62864	2.13561e-12							-8.36912	-5.5212e-12	-5.5212			8.36984	1.00857e-11	10.0857
				1.63096	8.82719e-13							-8.3668	-7.21755e-12	-7.21755			8.36752	1.05959e-11	10.5959
				1.63328	2.04143e-12							-8.36448	-7.52511e-12	-7.52511			8.3652	1.24973e-11	12.4973
				1.6356	1.2773e-12							-8.36216	-9.1857e-12	-9.1857			8.36288	9.41572e-12	9.41572
				1.63792	4.58298e-12							-8.35984	-9.73883e-12	-9.73883			8.36056	1.09964e-11	10.9964
				1.64024	5.2732e-12							-8.35752	-7.3606e-12	-7.3606			8.35824	8.21886e-12	8.21886
				1.64256	3.15485e-12							-8.3552	-6.44031e-12	-6.44031			8.35592	7.90415e-12	7.90415
				1.64488	4.92511e-12							-8.35288	-7.06258e-12	-7.06258			8.3536	7.90772e-12	7.90772
				1.6472	3.21922e-12							-8.35056	-7.2557e-12	-7.2557			8.35128	1.14947e-11	11.4947
				1.64952	1.79109e-12							-8.34824	-7.05543e-12	-7.05543			8.34896	1.0795e-11	10.795
				1.65184	4.19316e-12							-8.34592	-6.21023e-12	-6.21023			8.34664	8.34164e-12	8.34164
				1.65416	3.58281e-12							-8.3436	-6.58574e-12	-6.58574			8.34432	9.92236e-12	9.92236
				1.65648	2.59933e-12							-8.34128	-5.79062e-12	-5.79062			8.342	8.20694e-12	8.20694
				1.6588	4.46377e-12							-8.33896	-6.79794e-12	-6.79794			8.33968	9.45029e-12	9.45029
				1.66112	4.82855e-12							-8.33664	-7.43571e-12	-7.43571			8.33736	1.13731e-11	11.3731
				1.66344	2.66847e-12							-8.33432	-8.13189e-12	-8.13189			8.33504	9.88064e-12	9.88064
				1.66576	1.97229e-12							-8.332	-8.35719e-12	-8.35719			8.33272	1.01739e-11	10.1739
				1.66808	2.45628e-12							-8.32968	-5.86214e-12	-5.86214			8.3304	9.31558e-12	9.31558
				1.6704	2.61602e-12							-8.32736	-7.16748e-12	-7.16748			8.32808	9.74474e-12	9.74474
				1.67272	3.52678e-12							-8.32504	-6.36521e-12	-6.36521			8.32576	1.04266e-11	10.4266
				1.67504	1.99375e-12							-8.32272	-9.31206e-12	-9.31206			8.32344	1.11848e-11	11.1848
				1.67736	2.23217e-12							-8.3204	-7.19967e-12	-7.19967			8.32112	1.09845e-11	10.9845
				1.67968	4.12402e-12							-8.31808	-7.8887e-12	-7.8887			8.3188	9.28936e-12	9.28936
				1.682	3.52797e-12							-8.31576	-7.3153e-12	-7.3153			8.31648	1.03599e-11	10.3599
				1.68432	3.27406e-12							-8.31344	-7.2712e-12	-7.2712			8.31416	1.03897e-11	10.3897
				1.68664	3.68652e-12							-8.31112	-6.71449e-12	-6.71449			8.31184	8.88643e-12	8.88643
				1.68896	2.81033e-12							-8.3088	-6.85873e-12	-6.85873			8.30952	7.37128e-12	7.37128
				1.69128	3.38611e-12							-8.30648	-6.28295e-12	-6.28295			8.3072	8.60867e-12	8.60867
				1.6936	2.5886e-12							-8.30416	-7.97453e-12	-7.97453			8.30488	1.08975e-11	10.8975
				1.69592	8.89871e-13							-8.30184	-7.95784e-12	-7.95784			8.30256	9.76381e-12	9.76381
				1.69824	2.71973e-12							-8.29952	-7.4822e-12	-7.4822			8.30024	1.19751e-11	11.9751
				1.70056	1.91269e-12							-8.2972	-7.16033e-12	-7.16033			8.29792	9.04498e-12	9.04498
				1.70288	3.90706e-12							-8.29488	-7.77068e-12	-7.77068			8.2956	9.71017e-12	9.71017
				1.7052	3.50055e-12							-8.29256	-6.68707e-12	-6.68707			8.29328	9.05094e-12	9.05094
				1.70752	4.52337e-12							-8.29024	-8.81138e-12	-8.81138			8.29096	9.86633e-12	9.86633
				1.70984	5.31134e-12							-8.28792	-9.62439e-12	-9.62439			8.28864	1.07699e-11	10.7699
				1.71216	3.62811e-12							-8.2856	-6.05526e-12	-6.05526			8.28632	8.67901e-12	8.67901
				1.71448	4.45423e-12							-8.28328	-5.72505e-12	-5.72505			8.284	8.97941e-12	8.97941
				1.7168	1.42035e-12							-8.28096	-6.16374e-12	-6.16374			8.28168	8.04481e-12	8.04481
				1.71912	2.39906e-12							-8.27864	-6.15301e-12	-6.15301			8.27936	9.13677e-12	9.13677
				1.72144	4.74152e-12							-8.27632	-6.5476e-12	-6.5476			8.27704	9.50989e-12	9.50989
				1.72376	1.84116e-12							-8.274	-6.87185e-12	-6.87185			8.27472	7.68957e-12	7.68957
				1.72608	2.23455e-12							-8.27168	-8.71482e-12	-8.71482			8.2724	1.03694e-11	10.3694
				1.7284	5.48301e-12							-8.26936	-7.70393e-12	-7.70393			8.27008	9.58619e-12	9.58619
				1.73072	1.63731e-12							-8.26704	-6.60482e-12	-6.60482			8.26776	8.8912e-12	8.8912
				1.73304	3.91659e-12							-8.26472	-7.22947e-12	-7.22947			8.26544	1.04779e-11	10.4779
				1.73536	2.14514e-12							-8.2624	-7.07331e-12	-7.07331			8.26312	8.85067e-12	8.85067
				1.73768	1.58844e-12							-8.26008	-6.78244e-12	-6.78244			8.2608	8.65397e-12	8.65397
				1.74	1.72314e-12							-8.25776	-7.31769e-12	-7.31769			8.25848	9.86871e-12	9.86871
				1.74232	1.22008e-12							-8.25544	-6.03976e-12	-6.03976			8.25616	9.62553e-12	9.62553
				1.74464	3.71513e-12							-8.25312	-6.64058e-12	-6.64058			8.25384	1.18381e-11	11.8381
				1.74696	5.0312e-12							-8.2508	-6.8337e-12	-6.8337			8.25152	9.44314e-12	9.44314
				1.74928	3.59354e-12							-8.24848	-7.04708e-12	-7.04708			8.2492	8.93769e-12	8.93769
				1.7516	3.18703e-12							-8.24616	-6.12917e-12	-6.12917			8.24688	9.92713e-12	9.92713
				1.75392	3.51724e-12							-8.24384	-6.51899e-12	-6.51899			8.24456	1.11967e-11	11.1967
				1.75624	4.05488e-12							-8.24152	-7.85651e-12	-7.85651			8.24224	1.00213e-11	10.0213
				1.75856	4.3374e-12							-8.2392	-7.00536e-12	-7.00536			8.23992	1.00463e-11	10.0463
				1.76088	3.76997e-12							-8.23688	-6.71807e-12	-6.71807			8.2376	1.03658e-11	10.3658
				1.7632	5.16948e-12							-8.23456	-5.63922e-12	-5.63922			8.23528	1.08057e-11	10.8057
				1.76552	3.65076e-12							-8.23224	-4.95854e-12	-4.95854			8.23296	1.20765e-11	12.0765
				1.76784	3.0416e-12							-8.22992	-7.06258e-12	-7.06258			8.23064	1.136e-11	11.36
				1.77016	3.33843e-12							-8.2276	-5.26371e-12	-5.26371			8.22832	8.70762e-12	8.70762
				1.77248	2.30131e-12							-8.22528	-6.43912e-12	-6.43912			8.226	8.00786e-12	8.00786
				1.7748	2.79841e-12							-8.22296	-7.36537e-12	-7.36537			8.22368	6.87895e-12	6.87895
				1.77712	2.69232e-12							-8.22064	-7.09834e-12	-7.09834			8.22136	9.27028e-12	9.27028
				1.77944	2.64582e-12							-8.21832	-6.10891e-12	-6.10891			8.21904	9.09743e-12	9.09743
				1.78176	2.81749e-12							-8.216	-8.15335e-12	-8.15335			8.21672	7.93037e-12	7.93037
				1.78408	1.25108e-12							-8.21368	-8.82449e-12	-8.82449			8.2144	9.51586e-12	9.51586
				1.7864	1.62182e-12							-8.21136	-6.76694e-12	-6.76694			8.21208	1.06817e-11	10.6817
				1.78872	3.2669e-12							-8.20904	-6.31752e-12	-6.31752			8.20976	1.05422e-11	10.5422
				1.79104	2.35138e-12							-8.20672	-7.2557e-12	-7.2557			8.20744	9.71017e-12	9.71017
				1.79336	2.4992e-12							-8.2044	-6.81105e-12	-6.81105			8.20512	1.14208e-11	11.4208
				1.79568	2.3335e-12							-8.20208	-6.56786e-12	-6.56786			8.2028	1.16974e-11	11.6974
				1.798	2.88543e-12							-8.19976	-5.95036e-12	-5.95036			8.20048	1.13052e-11	11.3052
				1.80032	3.00703e-12							-8.19744	-7.23186e-12	-7.23186			8.19816	1.01608e-11	10.1608
				1.80264	2.1213e-12							-8.19512	-6.71926e-12	-6.71926			8.19584	9.17134e-12	9.17134
				1.80496	3.71632e-12							-8.1928	-5.50571e-12	-5.50571			8.19352	9.25479e-12	9.25479
				1.80728	5.93481e-12							-8.19048	-5.16358e-12	-5.16358			8.1912	1.04898e-11	10.4898
				1.8096	5.47228e-12							-8.18816	-6.6525e-12	-6.6525			8.18888	8.79583e-12	8.79583
				1.81192	2.92835e-12							-8.18584	-6.31037e-12	-6.31037			8.18656	1.08129e-11	10.8129
				1.81424	2.62675e-12							-8.18352	-7.25451e-12	-7.25451			8.18424	9.9462e-12	9.9462
				1.81656	2.48728e-12							-8.1812	-6.10295e-12	-6.10295			8.18192	9.17611e-12	9.17611
				1.81888	2.09865e-12							-8.17888	-5.50928e-12	-5.50928			8.1796	8.89954e-12	8.89954
				1.8212	2.45151e-12							-8.17656	-5.34358e-12	-5.34358			8.17728	8.59198e-12	8.59198
				1.82352	2.27151e-12							-8.17424	-6.08387e-12	-6.08387			8.17496	7.32598e-12	7.32598
				1.82584	1.64923e-12							-8.17192	-4.24686e-12	-4.24686			8.17264	7.91964e-12	7.91964
				1.82816	2.22859e-12							-8.1696	-6.83489e-12	-6.83489			8.17032	9.32035e-12	9.32035
				1.83048	4.18362e-12							-8.16728	-6.7729e-12	-6.7729			8.168	1.01703e-11	10.1703
				1.8328	5.92408e-12							-8.16496	-7.73015e-12	-7.73015			8.16568	8.8757e-12	8.8757
				1.83512	2.20475e-12							-8.16264	-7.59187e-12	-7.59187			8.16336	9.60526e-12	9.60526
				1.83744	1.73745e-12							-8.16032	-4.81668e-12	-4.81668			8.16104	9.63506e-12	9.63506
				1.83976	3.48625e-12							-8.158	-6.7133e-12	-6.7133			8.15872	9.00802e-12	9.00802
				1.84208	2.61245e-12							-8.15568	-7.27716e-12	-7.27716			8.1564	8.46324e-12	8.46324
				1.8444	1.32022e-12							-8.15336	-6.86231e-12	-6.86231			8.15408	9.62553e-12	9.62553
				1.84672	1.42274e-12							-8.15104	-8.29878e-12	-8.29878			8.15176	8.44655e-12	8.44655
				1.84904	1.48353e-12							-8.14872	-7.04112e-12	-7.04112			8.14944	8.66232e-12	8.66232
				1.85136	3.9011e-12							-8.1464	-6.58813e-12	-6.58813			8.14712	9.81865e-12	9.81865
				1.85368	3.69844e-12							-8.14408	-7.86605e-12	-7.86605			8.1448	9.66248e-12	9.66248
				1.856	2.83656e-12							-8.14176	-7.2712e-12	-7.2712			8.14248	9.55758e-12	9.55758
				1.85832	2.77934e-12							-8.13944	-6.20904e-12	-6.20904			8.14016	8.83398e-12	8.83398
				1.86064	3.10836e-12							-8.13712	-3.8487e-12	-3.8487			8.13784	8.80656e-12	8.80656
				1.86296	4.64496e-12							-8.1348	-4.57587e-12	-4.57587			8.13552	8.40006e-12	8.40006
				1.86528	2.53496e-12							-8.13248	-3.28841e-12	-3.28841			8.1332	9.30843e-12	9.30843
				1.8676	3.1024e-12							-8.13016	-5.78346e-12	-5.78346			8.13088	7.00769e-12	7.00769
				1.86992	3.46002e-12							-8.12784	-7.60379e-12	-7.60379			8.12856	1.00797e-11	10.0797
				1.87224	2.71616e-12							-8.12552	-7.12576e-12	-7.12576			8.12624	1.00881e-11	10.0881
				1.87456	4.02984e-12							-8.1232	-6.31514e-12	-6.31514			8.12392	8.57172e-12	8.57172
				1.87688	4.15978e-12							-8.12088	-5.62849e-12	-5.62849			8.1216	7.92083e-12	7.92083
				1.8792	1.9401e-12							-8.11856	-9.43365e-12	-9.43365			8.11928	7.72533e-12	7.72533
				1.88152	2.36568e-12							-8.11624	-6.48322e-12	-6.48322			8.11696	1.04838e-11	10.4838
				1.88384	1.52406e-12							-8.11392	-7.92804e-12	-7.92804			8.11464	9.29532e-12	9.29532
				1.88616	3.51407e-14							-8.1116	-8.17719e-12	-8.17719			8.11232	7.39751e-12	7.39751
				1.88848	1.56579e-12							-8.10928	-8.16288e-12	-8.16288			8.11	8.78868e-12	8.78868
				1.8908	2.84133e-12							-8.10696	-7.92327e-12	-7.92327			8.10768	8.92696e-12	8.92696
				1.89312	1.61347e-12							-8.10464	-7.59783e-12	-7.59783			8.10536	7.98878e-12	7.98878
				1.89544	3.75328e-12							-8.10232	-9.28703e-12	-9.28703			8.10304	8.43463e-12	8.43463
				1.89776	3.65791e-12							-8.1	-6.55713e-12	-6.55713			8.10072	9.54327e-12	9.54327
				1.90008	1.71361e-12							-8.09768	-5.6583e-12	-5.6583			8.0984	9.81984e-12	9.81984
				1.9024	3.54943e-12							-8.09536	-5.97778e-12	-5.97778			8.09608	8.921e-12	8.921
				1.90472	3.59235e-12							-8.09304	-7.85294e-12	-7.85294			8.09376	9.49082e-12	9.49082
				1.90704	2.17018e-12							-8.09072	-7.58949e-12	-7.58949			8.09144	8.09011e-12	8.09011
				1.90936	3.64837e-12							-8.0884	-6.83608e-12	-6.83608			8.08912	8.18429e-12	8.18429
				1.91168	3.92375e-12							-8.08608	-6.06003e-12	-6.06003			8.0868	9.57427e-12	9.57427
				1.914	3.39923e-12							-8.08376	-6.1101e-12	-6.1101			8.08448	8.98537e-12	8.98537
				1.91632	2.60291e-12							-8.08144	-5.44849e-12	-5.44849			8.08216	8.17117e-12	8.17117
				1.91864	2.67443e-12							-8.07912	-5.95751e-12	-5.95751			8.07984	9.27028e-12	9.27028
				1.92096	2.99034e-12							-8.0768	-6.08864e-12	-6.08864			8.07752	9.59453e-12	9.59453
				1.92328	2.36807e-12							-8.07448	-4.49004e-12	-4.49004			8.0752	8.31065e-12	8.31065
				1.9256	2.65774e-12							-8.07216	-5.79062e-12	-5.79062			8.07288	8.56933e-12	8.56933
				1.92792	3.19776e-12							-8.06984	-5.66187e-12	-5.66187			8.07056	7.73606e-12	7.73606
				1.93024	3.00584e-12							-8.06752	-4.83098e-12	-4.83098			8.06824	9.2679e-12	9.2679
				1.93256	2.83179e-12							-8.0652	-6.3819e-12	-6.3819			8.06592	7.88865e-12	7.88865
				1.93488	1.52883e-12							-8.06288	-6.13156e-12	-6.13156			8.0636	7.22465e-12	7.22465
				1.9372	2.99511e-12							-8.06056	-6.70614e-12	-6.70614			8.06128	7.70745e-12	7.70745
				1.93952	2.28939e-12							-8.05824	-6.83489e-12	-6.83489			8.05896	8.49423e-12	8.49423
				1.94184	2.36807e-12							-8.05592	-5.36862e-12	-5.36862			8.05664	1.05267e-11	10.5267
				1.94416	4.01792e-12							-8.0536	-6.47607e-12	-6.47607			8.05432	1.0888e-11	10.888
				1.94648	5.35784e-12							-8.05128	-7.77903e-12	-7.77903			8.052	8.25939e-12	8.25939
				1.9488	2.98438e-12							-8.04896	-6.64177e-12	-6.64177			8.04968	6.8551e-12	6.8551
				1.95112	3.49459e-12							-8.04664	-5.74889e-12	-5.74889			8.04736	7.72056e-12	7.72056
				1.95344	3.10716e-12							-8.04432	-6.69899e-12	-6.69899			8.04504	8.68258e-12	8.68258
				1.95576	1.9413e-12							-8.042	-9.13444e-12	-9.13444			8.04272	8.45012e-12	8.45012
				1.95808	2.32198e-14							-8.03968	-6.8182e-12	-6.8182			8.0404	8.88524e-12	8.88524
				1.9604	2.81987e-12							-8.03736	-7.32365e-12	-7.32365			8.03808	1.07068e-11	10.7068
				1.96272	4.86789e-12							-8.03504	-7.52154e-12	-7.52154			8.03576	1.02728e-11	10.2728
				1.96504	4.24323e-12							-8.03272	-9.00212e-12	-9.00212			8.03344	9.91163e-12	9.91163
				1.96736	3.21207e-12							-8.0304	-8.16646e-12	-8.16646			8.03112	8.07819e-12	8.07819
				1.96968	2.58026e-12							-8.02808	-7.29385e-12	-7.29385			8.0288	9.0414e-12	9.0414
				1.972	2.97007e-12							-8.02576	-7.21994e-12	-7.21994			8.02648	1.07819e-11	10.7819
				1.97432	3.38492e-12							-8.02344	-4.90608e-12	-4.90608			8.02416	1.01644e-11	10.1644
				1.97664	2.14157e-12							-8.02112	-6.79913e-12	-6.79913			8.02184	7.97686e-12	7.97686
				1.97896	2.67205e-12							-8.0188	-5.37577e-12	-5.37577			8.01952	8.27489e-12	8.27489
				1.98128	2.36449e-12							-8.01648	-5.9897e-12	-5.9897			8.0172	7.64189e-12	7.64189
				1.9836	1.08418e-12							-8.01416	-4.47574e-12	-4.47574			8.01488	9.15107e-12	9.15107
				1.98592	1.81732e-12							-8.01184	-5.96705e-12	-5.96705			8.01256	1.05124e-11	10.5124
				1.98824	1.33929e-12							-8.00952	-5.52597e-12	-5.52597			8.01024	9.32631e-12	9.32631
				1.99056	1.84831e-12							-8.0072	-6.74668e-12	-6.74668			8.00792	7.0518e-12	7.0518
				1.99288	2.20237e-12							-8.00488	-9.59816e-12	-9.59816			8.0056	7.92441e-12	7.92441
				1.9952	3.18107e-12							-8.00256	-8.56343e-12	-8.56343			8.00328	6.5547e-12	6.5547
				1.99752	3.79858e-12							-8.00024	-6.65131e-12	-6.65131			8.00096	9.59692e-12	9.59692
				1.99984	2.01878e-12							-7.99792	-5.39961e-12	-5.39961			7.99864	9.4038e-12	9.4038
				2.00216	2.65417e-12							-7.9956	-5.21245e-12	-5.21245			7.99632	6.62861e-12	6.62861
				2.00448	2.56595e-12							-7.99328	-5.43895e-12	-5.43895			7.994	5.68208e-12	5.68208
				2.0068	1.54791e-12							-7.99096	-5.46637e-12	-5.46637			7.99168	7.68599e-12	7.68599
				2.00912	1.52883e-12							-7.98864	-5.13377e-12	-5.13377			7.98936	9.29651e-12	9.29651
				2.01144	3.34797e-12							-7.98632	-5.49259e-12	-5.49259			7.98704	7.5799e-12	7.5799
				2.01376	2.69589e-12							-7.984	-3.88565e-12	-3.88565			7.98472	5.92527e-12	5.92527
				2.01608	3.01537e-12							-7.98168	-4.45428e-12	-4.45428			7.9824	6.39496e-12	6.39496
				2.0184	4.2325e-12							-7.97936	-5.33762e-12	-5.33762			7.98008	7.202e-12	7.202
				2.02072	5.82871e-12							-7.97704	-7.55134e-12	-7.55134			7.97776	8.72431e-12	8.72431
				2.02304	4.53768e-12							-7.97472	-6.47726e-12	-6.47726			7.97544	9.89613e-12	9.89613
				2.02536	1.14975e-12							-7.9724	-6.96244e-12	-6.96244			7.97312	8.20694e-12	8.20694
				2.02768	8.06425e-13							-7.97008	-6.31633e-12	-6.31633			7.9708	7.06372e-12	7.06372
				2.03	1.11279e-12							-7.96776	-6.52971e-12	-6.52971			7.96848	7.58824e-12	7.58824
				2.03232	3.30624e-12							-7.96544	-4.06447e-12	-4.06447			7.96616	7.80401e-12	7.80401
				2.03464	1.53003e-12							-7.96312	-5.48425e-12	-5.48425			7.96384	1.05315e-11	10.5315
				2.03696	3.51009e-12							-7.9608	-6.10414e-12	-6.10414			7.96152	1.10346e-11	11.0346
				2.03928	2.74358e-12							-7.95848	-6.18282e-12	-6.18282			7.9592	1.07282e-11	10.7282
				2.0416	4.65486e-13							-7.95616	-5.12185e-12	-5.12185			7.95688	7.75513e-12	7.75513
				2.04392	9.94775e-13							-7.95384	-6.9541e-12	-6.9541			7.95456	6.92901e-12	6.92901
				2.04624	2.76384e-12							-7.95152	-5.45564e-12	-5.45564			7.95224	6.98981e-12	6.98981
				2.04856	1.49307e-12							-7.9492	-5.45326e-12	-5.45326			7.94992	8.08415e-12	8.08415
				2.05088	1.52526e-12							-7.94688	-7.11026e-12	-7.11026			7.9476	9.2071e-12	9.2071
				2.0532	2.80556e-12							-7.94456	-6.04096e-12	-6.04096			7.94528	8.45012e-12	8.45012
				2.05552	4.16932e-12							-7.94224	-3.78671e-12	-3.78671			7.94296	8.1831e-12	8.1831
				2.05784	4.0823e-12							-7.93992	-5.18146e-12	-5.18146			7.94064	7.19485e-12	7.19485
				2.06016	6.23045e-12							-7.9376	-5.39961e-12	-5.39961			7.93832	6.23164e-12	6.23164
				2.06248	4.15621e-12							-7.93528	-3.75333e-12	-3.75333			7.936	7.20796e-12	7.20796
				2.0648	2.80795e-12							-7.93296	-5.51882e-12	-5.51882			7.93368	8.27489e-12	8.27489
				2.06712	1.94249e-12							-7.93064	-6.58217e-12	-6.58217			7.93136	9.12008e-12	9.12008
				2.06944	2.5588e-12							-7.92832	-7.67651e-12	-7.67651			7.92904	9.08193e-12	9.08193
				2.07176	2.97007e-12							-7.926	-5.98493e-12	-5.98493			7.92672	7.59063e-12	7.59063
				2.07408	4.77967e-12							-7.92368	-6.12202e-12	-6.12202			7.9244	7.50956e-12	7.50956
				2.0764	2.15468e-12							-7.92136	-7.09477e-12	-7.09477			7.92208	9.10697e-12	9.10697
				2.07872	4.03819e-12							-7.91904	-6.82774e-12	-6.82774			7.91976	7.68599e-12	7.68599
				2.08104	1.64685e-12							-7.91672	-6.63343e-12	-6.63343			7.91744	8.91146e-12	8.91146
				2.08336	3.0118e-12							-7.9144	-5.4914e-12	-5.4914			7.91512	9.72209e-12	9.72209
				2.08568	1.95918e-12							-7.91208	-6.1554e-12	-6.1554			7.9128	9.09981e-12	9.09981
				2.088	2.19283e-12							-7.90976	-4.14672e-12	-4.14672			7.91048	8.81371e-12	8.81371
				2.09032	3.64122e-12							-7.90744	-5.44372e-12	-5.44372			7.90816	8.71596e-12	8.71596
				2.09264	2.61364e-12							-7.90512	-6.57621e-12	-6.57621			7.90584	8.02216e-12	8.02216
				2.09496	2.20356e-12							-7.9028	-5.99923e-12	-5.99923			7.90352	5.52354e-12	5.52354
				2.09728	4.36363e-12							-7.90048	-7.38325e-12	-7.38325			7.9012	7.59301e-12	7.59301
				2.0996	3.38969e-12							-7.89816	-7.84102e-12	-7.84102			7.89888	7.37843e-12	7.37843
				2.10192	4.25396e-12							-7.89584	-6.02665e-12	-6.02665			7.89656	9.28578e-12	9.28578
				2.10424	2.53973e-12							-7.89352	-5.59631e-12	-5.59631			7.89424	9.70421e-12	9.70421
				2.10656	3.97382e-12							-7.8912	-6.99344e-12	-6.99344			7.89192	9.163e-12	9.163
				2.10888	2.59576e-12							-7.88888	-7.14722e-12	-7.14722			7.8896	6.11839e-12	6.11839
				2.1112	3.80454e-12							-7.88656	-3.9238e-12	-3.9238			7.88728	8.8459e-12	8.8459
				2.11352	4.39462e-12							-7.88424	-6.82655e-12	-6.82655			7.88496	7.7158e-12	7.7158
				2.11584	5.63082e-12							-7.88192	-6.52018e-12	-6.52018			7.88264	9.53374e-12	9.53374
				2.11816	5.16114e-12							-7.8796	-7.50604e-12	-7.50604			7.88032	8.83517e-12	8.83517
				2.12048	5.14683e-12							-7.87728	-7.00894e-12	-7.00894			7.878	9.23571e-12	9.23571
				2.1228	3.68533e-12							-7.87496	-7.41663e-12	-7.41663			7.87568	7.94348e-12	7.94348
				2.12512	2.99153e-12							-7.87264	-6.44627e-12	-6.44627			7.87336	8.80298e-12	8.80298
				2.12744	2.59456e-12							-7.87032	-5.06225e-12	-5.06225			7.87104	7.81235e-12	7.81235
				2.12976	2.9057e-12							-7.868	-6.59409e-12	-6.59409			7.86872	8.4835e-12	8.4835
				2.13208	2.87351e-12							-7.86568	-7.44405e-12	-7.44405			7.8664	7.53221e-12	7.53221
				2.1344	2.16064e-12							-7.86336	-8.07944e-12	-8.07944			7.86408	8.71358e-12	8.71358
				2.13672	1.93534e-12							-7.86104	-6.39262e-12	-6.39262			7.86176	9.22618e-12	9.22618
				2.13904	4.24919e-12							-7.85872	-6.61912e-12	-6.61912			7.85944	8.16879e-12	8.16879
				2.14136	3.21326e-12							-7.8564	-6.64177e-12	-6.64177			7.85712	8.80775e-12	8.80775
				2.14368	4.32071e-12							-7.85408	-7.059e-12	-7.059			7.8548	8.93292e-12	8.93292
				2.146	2.87471e-12							-7.85176	-6.18878e-12	-6.18878			7.85248	9.82461e-12	9.82461
				2.14832	3.10836e-12							-7.84944	-6.63343e-12	-6.63343			7.85016	8.88047e-12	8.88047
				2.15064	4.04296e-12							-7.84712	-5.01337e-12	-5.01337			7.84784	9.20353e-12	9.20353
				2.15296	4.44827e-12							-7.8448	-5.1147e-12	-5.1147			7.84552	9.87706e-12	9.87706
				2.15528	5.34234e-12							-7.84248	-6.2901e-12	-6.2901			7.8432	1.015e-11	10.15
				2.1576	4.12163e-12							-7.84016	-8.15573e-12	-8.15573			7.84088	8.85067e-12	8.85067
				2.15992	5.11942e-12							-7.83784	-5.15404e-12	-5.15404			7.83856	7.86719e-12	7.86719
				2.16224	2.79007e-12							-7.83552	-5.21841e-12	-5.21841			7.83624	9.3275e-12	9.3275
				2.16456	4.34813e-12							-7.8332	-4.82383e-12	-4.82383			7.83392	1.1912e-11	11.912
				2.16688	5.15756e-12							-7.83088	-6.49276e-12	-6.49276			7.8316	9.95216e-12	9.95216
				2.1692	2.35734e-12							-7.82856	-7.20682e-12	-7.20682			7.82928	7.24134e-12	7.24134
				2.17152	3.79977e-12							-7.82624	-1.64809e-12	-1.64809			7.82696	8.22124e-12	8.22124
				2.17384	4.37078e-12							-7.82392	-4.86913e-12	-4.86913			7.82464	7.63354e-12	7.63354
				2.17616	4.03223e-12							-7.8216	-7.24616e-12	-7.24616			7.82232	8.31542e-12	8.31542
				2.17848	4.56748e-12							-7.81928	-5.64399e-12	-5.64399			7.82	8.88524e-12	8.88524
				2.1808	4.0668e-12							-7.81696	-5.56174e-12	-5.56174			7.81768	8.32019e-12	8.32019
				2.18312	3.04994e-12							-7.81464	-5.69287e-12	-5.69287			7.81536	7.91726e-12	7.91726
				2.18544	8.62453e-13							-7.81232	-5.85618e-12	-5.85618			7.81304	7.10187e-12	7.10187
				2.18776	2.79841e-12							-7.81	-7.90539e-12	-7.90539			7.81072	9.08789e-12	9.08789
				2.19008	2.98319e-12							-7.80768	-6.65608e-12	-6.65608			7.8084	9.45506e-12	9.45506
				2.1924	2.82702e-12							-7.80536	-6.22931e-12	-6.22931			7.80608	9.40857e-12	9.40857
				2.19472	5.62844e-12							-7.80304	-5.16596e-12	-5.16596			7.80376	7.70149e-12	7.70149
				2.19704	4.22415e-12							-7.80072	-4.21944e-12	-4.21944			7.80144	8.08534e-12	8.08534
				2.19936	5.73692e-12							-7.7984	-6.2758e-12	-6.2758			7.79912	7.48215e-12	7.48215
				2.20168	3.51128e-12							-7.79608	-6.2603e-12	-6.2603			7.7968	8.35952e-12	8.35952
				2.204	3.63288e-12							-7.79376	-6.24838e-12	-6.24838			7.79448	7.67407e-12	7.67407
				2.20632	4.27422e-12							-7.79144	-5.66902e-12	-5.66902			7.79216	7.66811e-12	7.66811
				2.20864	5.26843e-12							-7.78912	-6.45223e-12	-6.45223			7.78984	7.4738e-12	7.4738
				2.21096	3.77831e-12							-7.7868	-5.08728e-12	-5.08728			7.78752	1.13433e-11	11.3433
				2.21328	3.11074e-12							-7.78448	-5.371e-12	-5.371			7.7852	9.47056e-12	9.47056
				2.2156	3.27525e-12							-7.78216	-6.8182e-12	-6.8182			7.78288	8.46443e-12	8.46443
				2.21792	3.07975e-12							-7.77984	-6.41527e-12	-6.41527			7.78056	8.21171e-12	8.21171
				2.22024	2.74358e-12							-7.77752	-6.16374e-12	-6.16374			7.77824	1.01489e-11	10.1489
				2.22256	4.38509e-12							-7.7752	-5.38054e-12	-5.38054			7.77592	1.12098e-11	11.2098
				2.22488	3.42903e-12							-7.77288	-6.58693e-12	-6.58693			7.7736	9.09624e-12	9.09624
				2.2272	4.67596e-12							-7.77056	-6.34613e-12	-6.34613			7.77128	8.96511e-12	8.96511
				2.22952	3.60904e-12							-7.76824	-6.51303e-12	-6.51303			7.76896	7.34148e-12	7.34148
				2.23184	3.69487e-12							-7.76592	-7.24259e-12	-7.24259			7.76664	7.68599e-12	7.68599
				2.23416	9.87623e-13							-7.7636	-6.38905e-12	-6.38905			7.76432	7.87554e-12	7.87554
				2.23648	1.6031e-13							-7.76128	-6.17924e-12	-6.17924			7.762	9.46459e-12	9.46459
				2.2388	2.58384e-12							-7.75896	-6.08268e-12	-6.08268			7.75968	1.0125e-11	10.125
				2.24112	2.51231e-12							-7.75664	-5.18742e-12	-5.18742			7.75736	8.64801e-12	8.64801
				2.24344	1.39055e-12							-7.75432	-4.09427e-12	-4.09427			7.75504	8.50615e-12	8.50615
				2.24576	4.35171e-12							-7.752	-5.90387e-12	-5.90387			7.75272	9.62434e-12	9.62434
				2.24808	7.49883e-12							-7.74968	-7.75638e-12	-7.75638			7.7504	7.40823e-12	7.40823
				2.2504	4.52218e-12							-7.74736	-4.31004e-12	-4.31004			7.74808	9.20472e-12	9.20472
				2.25272	4.08945e-12							-7.74504	-3.97029e-12	-3.97029			7.74576	7.76467e-12	7.76467
				2.25504	4.48999e-12							-7.74272	-3.82605e-12	-3.82605			7.74344	8.82206e-12	8.82206
				2.25736	2.6339e-12							-7.7404	-5.43776e-12	-5.43776			7.74112	9.6601e-12	9.6601
				2.25968	2.73881e-12							-7.73808	-5.8836e-12	-5.8836			7.7388	1.0032e-11	10.032
				2.262	2.97007e-12							-7.73576	-6.01831e-12	-6.01831			7.73648	1.02812e-11	10.2812
				2.26432	4.01435e-12							-7.73344	-5.371e-12	-5.371			7.73416	8.77199e-12	8.77199
				2.26664	2.17376e-12							-7.73112	-4.8882e-12	-4.8882			7.73184	7.74679e-12	7.74679
				2.26896	3.86772e-12							-7.7288	-4.89655e-12	-4.89655			7.72952	9.46221e-12	9.46221
				2.27128	3.72348e-12							-7.72648	-5.81684e-12	-5.81684			7.7272	9.83772e-12	9.83772
				2.2736	4.20985e-12							-7.72416	-6.96721e-12	-6.96721			7.72488	1.07676e-11	10.7676
				2.27592	2.72093e-12							-7.72184	-5.04675e-12	-5.04675			7.72256	1.0125e-11	10.125
				2.27824	2.46939e-12							-7.71952	-6.3962e-12	-6.3962			7.72024	9.03067e-12	9.03067
				2.28056	3.6901e-12							-7.7172	-4.68555e-12	-4.68555			7.71792	8.00667e-12	8.00667
				2.28288	3.61261e-12							-7.71488	-5.09682e-12	-5.09682			7.7156	8.98776e-12	8.98776
				2.2852	4.08349e-12							-7.71256	-4.45547e-12	-4.45547			7.71328	9.42287e-12	9.42287
				2.28752	4.91318e-12							-7.71024	-5.14689e-12	-5.14689			7.71096	7.73964e-12	7.73964
				2.28984	4.88815e-12							-7.70792	-7.09596e-12	-7.09596			7.70864	8.50377e-12	8.50377
				2.29216	5.1826e-12							-7.7056	-7.12576e-12	-7.12576			7.70632	8.87451e-12	8.87451
				2.29448	2.61245e-12							-7.70328	-7.4965e-12	-7.4965			7.704	1.15114e-11	11.5114
				2.2968	3.62334e-12							-7.70096	-6.36401e-12	-6.36401			7.70168	8.52284e-12	8.52284
				2.29912	3.72228e-12							-7.69864	-4.42329e-12	-4.42329			7.69936	7.86838e-12	7.86838
				2.30144	3.91063e-12							-7.69632	-5.92294e-12	-5.92294			7.69704	8.29277e-12	8.29277
				2.30376	1.73864e-12							-7.694	-7.9638e-12	-7.9638			7.69472	1.00618e-11	10.0618
				2.30608	3.91421e-12							-7.69168	-4.73204e-12	-4.73204			7.6924	7.81831e-12	7.81831
				2.3084	2.31323e-12							-7.68936	-6.43435e-12	-6.43435			7.69008	8.0162e-12	8.0162
				2.31072	4.00481e-12							-7.68704	-5.81088e-12	-5.81088			7.68776	9.72328e-12	9.72328
				2.31304	5.91573e-12							-7.68472	-5.70955e-12	-5.70955			7.68544	1.03932e-11	10.3932
				2.31536	4.04892e-12							-7.6824	-7.05543e-12	-7.05543			7.68312	9.91521e-12	9.91521
				2.31768	3.40161e-12							-7.68008	-6.15421e-12	-6.15421			7.6808	1.18679e-11	11.8679
				2.32	2.2572e-12							-7.67776	-3.76644e-12	-3.76644			7.67848	9.4181e-12	9.4181
				2.32232	4.30045e-12							-7.67544	-3.84393e-12	-3.84393			7.67616	8.45012e-12	8.45012
				2.32464	4.00958e-12							-7.67312	-5.4318e-12	-5.4318			7.67384	9.29174e-12	9.29174
				2.32696	3.2526e-12							-7.6708	-4.5568e-12	-4.5568			7.67152	7.94825e-12	7.94825
				2.32928	3.40161e-12							-7.66848	-4.22302e-12	-4.22302			7.6692	8.1366e-12	8.1366
				2.3316	4.88815e-12							-7.66616	-6.29368e-12	-6.29368			7.66688	8.45012e-12	8.45012
				2.33392	4.1729e-12							-7.66384	-4.25401e-12	-4.25401			7.66456	8.86855e-12	8.86855
				2.33624	2.7102e-12							-7.66152	-6.38905e-12	-6.38905			7.66224	8.56933e-12	8.56933
				2.33856	1.24988e-12							-7.6592	-4.62594e-12	-4.62594			7.65992	6.96001e-12	6.96001
				2.34088	2.83298e-12							-7.65688	-4.10619e-12	-4.10619			7.6576	6.85272e-12	6.85272
				2.3432	4.08706e-12							-7.65456	-5.59392e-12	-5.59392			7.65528	8.35476e-12	8.35476
				2.34552	3.83672e-12							-7.65224	-6.4117e-12	-6.4117			7.65296	8.72669e-12	8.72669
				2.34784	2.74e-12							-7.64992	-6.27222e-12	-6.27222			7.65064	7.45234e-12	7.45234
				2.35016	5.46751e-12							-7.6476	-5.30544e-12	-5.30544			7.64832	7.02438e-12	7.02438
				2.35248	3.11074e-12							-7.64528	-6.62627e-12	-6.62627			7.646	7.16624e-12	7.16624
				2.3548	3.66149e-12							-7.64296	-5.67141e-12	-5.67141			7.64368	7.59301e-12	7.59301
				2.35712	3.61142e-12							-7.64064	-5.86453e-12	-5.86453			7.64136	7.97567e-12	7.97567
				2.35944	3.55658e-12							-7.63832	-4.73323e-12	-4.73323			7.63904	7.56202e-12	7.56202
				2.36176	3.39446e-12							-7.636	-4.96927e-12	-4.96927			7.63672	8.44297e-12	8.44297
				2.36408	5.76434e-12							-7.63368	-4.21109e-12	-4.21109			7.6344	8.68258e-12	8.68258
				2.3664	5.67851e-12							-7.63136	-4.1944e-12	-4.1944			7.63208	9.53731e-12	9.53731
				2.36872	3.15485e-12							-7.62904	-3.95241e-12	-3.95241			7.62976	9.01041e-12	9.01041
				2.37104	3.02014e-12							-7.62672	-4.9645e-12	-4.9645			7.62744	1.01715e-11	10.1715
				2.37336	3.80811e-12							-7.6244	-2.77343e-12	-2.77343			7.62512	6.72397e-12	6.72397
				2.37568	3.0869e-12							-7.62208	-3.60193e-12	-3.60193			7.6228	6.48794e-12	6.48794
				2.378	2.91166e-12							-7.61976	-5.36742e-12	-5.36742			7.62048	7.95302e-12	7.95302
				2.38032	2.00567e-12							-7.61744	-6.01473e-12	-6.01473			7.61816	7.6252e-12	7.6252
				2.38264	2.40025e-12							-7.61512	-4.6629e-12	-4.6629			7.61584	7.95302e-12	7.95302
				2.38496	2.48251e-12							-7.6128	-5.8228e-12	-5.8228			7.61352	9.09743e-12	9.09743
				2.38728	2.37283e-12							-7.61048	-6.62031e-12	-6.62031			7.6112	9.58619e-12	9.58619
				2.3896	3.79858e-12							-7.60816	-6.62747e-12	-6.62747			7.60888	6.87775e-12	6.87775
				2.39192	3.57446e-12							-7.60584	-5.36146e-12	-5.36146			7.60656	6.83484e-12	6.83484
				2.39424	3.93209e-12							-7.60352	-3.54948e-12	-3.54948			7.60424	9.79123e-12	9.79123
				2.39656	3.9762e-12							-7.6012	-3.71518e-12	-3.71518			7.60192	1.07389e-11	10.7389
				2.39888	3.58042e-12							-7.59888	-5.15881e-12	-5.15881			7.5996	9.12246e-12	9.12246
				2.4012	5.1671e-12							-7.59656	-4.43878e-12	-4.43878			7.59728	8.00309e-12	8.00309
				2.40352	5.21955e-12							-7.59424	-3.74141e-12	-3.74141			7.59496	1.01036e-11	10.1036
				2.40584	4.34217e-12							-7.59192	-5.62015e-12	-5.62015			7.59264	8.77914e-12	8.77914
				2.40816	2.89378e-12							-7.5896	-4.98476e-12	-4.98476			7.59032	8.74219e-12	8.74219
				2.41048	2.99153e-12							-7.58728	-5.53909e-12	-5.53909			7.588	8.60748e-12	8.60748
				2.4128	4.13356e-12							-7.58496	-5.84307e-12	-5.84307			7.58568	6.41045e-12	6.41045
				2.41512	4.14905e-12							-7.58264	-3.09649e-12	-3.09649			7.58336	8.00428e-12	8.00428
				2.41744	4.47092e-12							-7.58032	-6.33064e-12	-6.33064			7.58104	8.61702e-12	8.61702
				2.41976	5.78341e-12							-7.578	-5.25537e-12	-5.25537			7.57872	8.05912e-12	8.05912
				2.42208	4.48761e-12							-7.57568	-3.79505e-12	-3.79505			7.5764	7.44161e-12	7.44161
				2.4244	4.28972e-12							-7.57336	-4.48766e-12	-4.48766			7.57408	8.36072e-12	8.36072
				2.42672	5.85971e-12							-7.57104	-5.34001e-12	-5.34001			7.57176	8.31661e-12	8.31661
				2.42904	6.00395e-12							-7.56872	-5.03006e-12	-5.03006			7.56944	8.13184e-12	8.13184
				2.43136	4.45423e-12							-7.5664	-5.16834e-12	-5.16834			7.56712	7.9411e-12	7.9411
				2.43368	4.37913e-12							-7.56408	-6.48084e-12	-6.48084			7.5648	7.64069e-12	7.64069
				2.436	4.32906e-12							-7.56176	-5.30067e-12	-5.30067			7.56248	8.33449e-12	8.33449
				2.43832	5.82037e-12							-7.55944	-6.13871e-12	-6.13871			7.56016	7.55009e-12	7.55009
				2.44064	5.05504e-12							-7.55712	-3.58048e-12	-3.58048			7.55784	8.43343e-12	8.43343
				2.44296	3.50294e-12							-7.5548	-4.14076e-12	-4.14076			7.55552	9.31439e-12	9.31439
				2.44528	5.1969e-12							-7.55248	-4.86794e-12	-4.86794			7.5532	1.00249e-11	10.0249
				2.4476	4.07634e-12							-7.55016	-4.74396e-12	-4.74396			7.55088	7.98282e-12	7.98282
				2.44992	4.03461e-12							-7.54784	-5.27444e-12	-5.27444			7.54856	9.31678e-12	9.31678
				2.45224	3.81407e-12							-7.54552	-5.19457e-12	-5.19457			7.54624	1.05434e-11	10.5434
				2.45456	2.73046e-12							-7.5432	-4.74992e-12	-4.74992			7.54392	8.2582e-12	8.2582
				2.45688	3.87726e-12							-7.54088	-5.31497e-12	-5.31497			7.5416	1.10966e-11	11.0966
				2.4592	5.25055e-12							-7.53856	-7.93996e-12	-7.93996			7.53928	8.79822e-12	8.79822
				2.46152	5.03835e-12							-7.53624	-5.92771e-12	-5.92771			7.53696	8.83994e-12	8.83994
				2.46384	3.95474e-12							-7.53392	-5.5367e-12	-5.5367			7.53464	8.53476e-12	8.53476
				2.46616	1.78394e-12							-7.5316	-5.16119e-12	-5.16119			7.53232	7.8207e-12	7.8207
				2.46848	4.01673e-12							-7.52928	-4.46143e-12	-4.46143			7.53	8.39052e-12	8.39052
				2.4708	2.84371e-12							-7.52696	-6.82774e-12	-6.82774			7.52768	1.00237e-11	10.0237
				2.47312	3.95951e-12							-7.52464	-5.79062e-12	-5.79062			7.52536	8.79345e-12	8.79345
				2.47544	3.13458e-12							-7.52232	-7.17702e-12	-7.17702			7.52304	9.8866e-12	9.8866
				2.47776	2.65536e-12							-7.52	-7.48458e-12	-7.48458			7.52072	8.4692e-12	8.4692
				2.48008	2.90808e-12							-7.51768	-6.70257e-12	-6.70257			7.5184	7.44996e-12	7.44996
				2.4824	3.07617e-12							-7.51536	-7.1651e-12	-7.1651			7.51608	7.90891e-12	7.90891
				2.48472	2.68159e-12							-7.51304	-6.32348e-12	-6.32348			7.51376	7.33671e-12	7.33671
				2.48704	3.14412e-12							-7.51072	-4.55561e-12	-4.55561			7.51144	1.00034e-11	10.0034
				2.48936	6.10289e-12							-7.5084	-4.8584e-12	-4.8584			7.50912	9.09981e-12	9.09981
				2.49168	5.68089e-12							-7.50608	-6.10652e-12	-6.10652			7.5068	6.79192e-12	6.79192
				2.494	6.10528e-12							-7.50376	-5.50213e-12	-5.50213			7.50448	7.12332e-12	7.12332
				2.49632	3.93328e-12							-7.50144	-4.07758e-12	-4.07758			7.50216	8.35952e-12	8.35952
				2.49864	2.76742e-12							-7.49912	-6.98152e-12	-6.98152			7.49984	8.30827e-12	8.30827
				2.50096	2.19879e-12							-7.4968	-6.02904e-12	-6.02904			7.49752	6.54397e-12	6.54397
				2.50328	3.05352e-12							-7.49448	-5.71313e-12	-5.71313			7.4952	7.75275e-12	7.75275
				2.5056	4.95014e-12							-7.49216	-3.77598e-12	-3.77598			7.49288	8.08177e-12	8.08177
				2.50792	2.86398e-12							-7.48984	-6.26745e-12	-6.26745			7.49056	7.93037e-12	7.93037
				2.51024	3.87368e-12							-7.48752	-4.05612e-12	-4.05612			7.48824	7.3379e-12	7.3379
				2.51256	4.27303e-12							-7.4852	-2.17977e-12	-2.17977			7.48592	6.48317e-12	6.48317
				2.51488	4.60086e-12							-7.48288	-2.78058e-12	-2.78058			7.4836	7.09352e-12	7.09352
				2.5172	4.26945e-12							-7.48056	-5.23391e-12	-5.23391			7.48128	8.8006e-12	8.8006
				2.51952	1.83043e-12							-7.47824	-3.82843e-12	-3.82843			7.47896	9.29413e-12	9.29413
				2.52184	5.30181e-12							-7.47592	-5.87168e-12	-5.87168			7.47664	8.42867e-12	8.42867
				2.52416	4.0966e-12							-7.4736	-4.9645e-12	-4.9645			7.47432	8.83517e-12	8.83517
				2.52648	3.23591e-12							-7.47128	-6.21619e-12	-6.21619			7.472	8.17714e-12	8.17714
				2.5288	3.91183e-12							-7.46896	-6.23646e-12	-6.23646			7.46968	7.2783e-12	7.2783
				2.53112	4.53171e-12							-7.46664	-7.13649e-12	-7.13649			7.46736	8.77437e-12	8.77437
				2.53344	4.18839e-12							-7.46432	-7.3618e-12	-7.3618			7.46504	9.08909e-12	9.08909
				2.53576	4.50191e-12							-7.462	-4.316e-12	-4.316			7.46272	7.96137e-12	7.96137
				2.53808	4.44231e-12							-7.45968	-5.29351e-12	-5.29351			7.4604	7.62281e-12	7.62281
				2.5404	1.4883e-12							-7.45736	-3.38378e-12	-3.38378			7.45808	8.16641e-12	8.16641
				2.54272	2.34661e-12							-7.45504	-6.20785e-12	-6.20785			7.45576	8.71477e-12	8.71477
				2.54504	3.52559e-12							-7.45272	-6.33302e-12	-6.33302			7.45344	6.21972e-12	6.21972
				2.54736	6.03852e-12							-7.4504	-4.79641e-12	-4.79641			7.45112	8.56218e-12	8.56218
				2.54968	4.63185e-12							-7.44808	-6.8027e-12	-6.8027			7.4488	6.23522e-12	6.23522
				2.552	4.48284e-12							-7.44576	-5.70955e-12	-5.70955			7.44648	9.06286e-12	9.06286
				2.55432	5.04551e-12							-7.44344	-5.04079e-12	-5.04079			7.44416	7.71699e-12	7.71699
				2.55664	5.06458e-12							-7.44112	-4.0299e-12	-4.0299			7.44184	6.91709e-12	6.91709
				2.55896	5.62129e-12							-7.4388	-5.34954e-12	-5.34954			7.43952	6.04448e-12	6.04448
				2.56128	5.60698e-12							-7.43648	-3.66631e-12	-3.66631			7.4372	6.77881e-12	6.77881
				2.5636	2.09031e-12							-7.43416	-4.62833e-12	-4.62833			7.43488	7.42492e-12	7.42492
				2.56592	4.38986e-12							-7.43184	-3.45888e-12	-3.45888			7.43256	9.85799e-12	9.85799
				2.56824	3.12385e-12							-7.42952	-3.76406e-12	-3.76406			7.43024	7.8958e-12	7.8958
				2.57056	4.28376e-12							-7.4272	-4.61998e-12	-4.61998			7.42792	7.42016e-12	7.42016
				2.57288	3.32055e-12							-7.42488	-4.07996e-12	-4.07996			7.4256	7.73368e-12	7.73368
				2.5752	2.69112e-12							-7.42256	-4.96211e-12	-4.96211			7.42328	6.29601e-12	6.29601
				2.57752	2.3633e-12							-7.42024	-4.19083e-12	-4.19083			7.42096	6.30913e-12	6.30913
				2.57984	3.65433e-12							-7.41792	-5.00741e-12	-5.00741			7.41864	6.12554e-12	6.12554
				2.58216	3.60904e-12							-7.4156	-5.17788e-12	-5.17788			7.41632	7.63354e-12	7.63354
				2.58448	3.84388e-12							-7.41328	-4.97642e-12	-4.97642			7.414	6.51536e-12	6.51536
				2.5868	3.04756e-12							-7.41096	-5.28517e-12	-5.28517			7.41168	1.07306e-11	10.7306
				2.58912	2.88067e-12							-7.40864	-6.43196e-12	-6.43196			7.40936	9.19399e-12	9.19399
				2.59144	3.91302e-12							-7.40632	-5.54981e-12	-5.54981			7.40704	7.21035e-12	7.21035
				2.59376	6.69417e-12							-7.404	-5.90267e-12	-5.90267			7.40472	7.44161e-12	7.44161
				2.59608	4.5937e-12							-7.40168	-7.00536e-12	-7.00536			7.4024	8.00667e-12	8.00667
				2.5984	4.63304e-12							-7.39936	-6.1852e-12	-6.1852			7.40008	8.04958e-12	8.04958
				2.60072	4.98829e-12							-7.39704	-6.26626e-12	-6.26626			7.39776	7.8362e-12	7.8362
				2.60304	4.1729e-12							-7.39472	-6.0791e-12	-6.0791			7.39544	8.05793e-12	8.05793
				2.60536	2.22025e-12							-7.3924	-4.05374e-12	-4.05374			7.39312	6.65483e-12	6.65483
				2.60768	4.19554e-12							-7.39008	-3.77836e-12	-3.77836			7.3908	8.6039e-12	8.6039
				2.61	2.4527e-12							-7.38776	-5.89433e-12	-5.89433			7.38848	8.02812e-12	8.02812
				2.61232	5.12895e-12							-7.38544	-6.87661e-12	-6.87661			7.38616	7.72295e-12	7.72295
				2.61464	4.2623e-12							-7.38312	-5.40438e-12	-5.40438			7.38384	7.87673e-12	7.87673
				2.61696	6.09729e-13							-7.3808	-6.23884e-12	-6.23884			7.38152	8.98299e-12	8.98299
				2.61928	1.36671e-12							-7.37848	-3.35875e-12	-3.35875			7.3792	7.26042e-12	7.26042
				2.6216	4.35529e-12							-7.37616	-5.1004e-12	-5.1004			7.37688	6.49152e-12	6.49152
				2.62392	5.08604e-12							-7.37384	-4.71535e-12	-4.71535			7.37456	6.29363e-12	6.29363
				2.62624	5.23624e-12							-7.37152	-5.43061e-12	-5.43061			7.37224	8.51807e-12	8.51807
				2.62856	3.81527e-12							-7.3692	-5.26014e-12	-5.26014			7.36992	8.41555e-12	8.41555
				2.63088	3.98097e-12							-7.36688	-9.59339e-12	-9.59339			7.3676	9.04736e-12	9.04736
				2.6332	3.25737e-12							-7.36456	-5.42464e-12	-5.42464			7.36528	7.76586e-12	7.76586
				2.63552	2.47535e-12							-7.36224	-5.67737e-12	-5.67737			7.36296	7.59659e-12	7.59659
				2.63784	4.09779e-12							-7.35992	-6.83727e-12	-6.83727			7.36064	9.13677e-12	9.13677
				2.64016	3.36227e-12							-7.3576	-4.68435e-12	-4.68435			7.35832	7.66096e-12	7.66096
				2.64248	4.91914e-12							-7.35528	-4.53058e-12	-4.53058			7.356	6.91709e-12	6.91709
				2.6448	5.64394e-12							-7.35296	-6.3509e-12	-6.3509			7.35368	7.13525e-12	7.13525
				2.64712	6.25071e-12							-7.35064	-6.2603e-12	-6.2603			7.35136	7.1722e-12	7.1722
				2.64944	4.53291e-12							-7.34832	-6.25792e-12	-6.25792			7.34904	5.88116e-12	5.88116
				2.65176	2.67086e-12							-7.346	-7.56445e-12	-7.56445			7.34672	9.7507e-12	9.7507
				2.65408	3.15842e-12							-7.34368	-6.35329e-12	-6.35329			7.3444	9.24763e-12	9.24763
				2.6564	3.74017e-12							-7.34136	-6.51303e-12	-6.51303			7.34208	8.68973e-12	8.68973
				2.65872	4.62351e-12							-7.33904	-5.96347e-12	-5.96347			7.33976	7.64069e-12	7.64069
				2.66104	4.31356e-12							-7.33672	-4.45428e-12	-4.45428			7.33744	7.46188e-12	7.46188
				2.66336	5.59029e-12							-7.3344	-2.84257e-12	-2.84257			7.33512	7.5191e-12	7.5191
				2.66568	4.7749e-12							-7.33208	-3.42074e-12	-3.42074			7.3328	6.80027e-12	6.80027
				2.668	4.46853e-12							-7.32976	-4.68316e-12	-4.68316			7.33048	7.90057e-12	7.90057
				2.67032	2.95458e-12							-7.32744	-6.74191e-12	-6.74191			7.32816	8.85544e-12	8.85544
				2.67264	2.75669e-12							-7.32512	-5.96705e-12	-5.96705			7.32584	6.51655e-12	6.51655
				2.67496	1.9413e-12							-7.3228	-7.85651e-12	-7.85651			7.32352	6.9016e-12	6.9016
				2.67728	4.08826e-12							-7.32048	-3.45292e-12	-3.45292			7.3212	8.02932e-12	8.02932
				2.6796	2.76146e-12							-7.31816	-4.93589e-12	-4.93589			7.31888	9.52062e-12	9.52062
				2.68192	5.36976e-12							-7.31584	-6.12321e-12	-6.12321			7.31656	9.49917e-12	9.49917
				2.68424	5.05504e-12							-7.31352	-3.73545e-12	-3.73545			7.31424	6.5082e-12	6.5082
				2.68656	3.80335e-12							-7.3112	-5.23749e-12	-5.23749			7.31192	6.64172e-12	6.64172
				2.68888	4.71172e-12							-7.30888	-6.02069e-12	-6.02069			7.3096	6.08859e-12	6.08859
				2.6912	6.74066e-12							-7.30656	-6.08149e-12	-6.08149			7.30728	6.34846e-12	6.34846
				2.69352	2.13203e-12							-7.30424	-4.97523e-12	-4.97523			7.30496	7.24373e-12	7.24373
				2.69584	3.60188e-12							-7.30192	-5.84188e-12	-5.84188			7.30264	6.70371e-12	6.70371
				2.69816	4.1872e-12							-7.2996	-5.21603e-12	-5.21603			7.30032	9.21783e-12	9.21783
				2.70048	4.82497e-12							-7.29728	-5.42584e-12	-5.42584			7.298	7.73606e-12	7.73606
				2.7028	5.64155e-12							-7.29496	-5.30424e-12	-5.30424			7.29568	9.19637e-12	9.19637
				2.70512	3.98812e-12							-7.29264	-5.28398e-12	-5.28398			7.29336	6.70132e-12	6.70132
				2.70744	3.32889e-12							-7.29032	-6.74429e-12	-6.74429			7.29104	7.05299e-12	7.05299
				2.70976	4.14071e-12							-7.288	-7.03039e-12	-7.03039			7.28872	5.73096e-12	5.73096
				2.71208	1.82805e-12							-7.28568	-5.8991e-12	-5.8991			7.2864	9.14154e-12	9.14154
				2.7144	4.3839e-12							-7.28336	-5.82876e-12	-5.82876			7.28408	7.07326e-12	7.07326
				2.71672	4.99306e-12							-7.28104	-7.28431e-12	-7.28431			7.28176	7.76348e-12	7.76348
				2.71904	4.44231e-12							-7.27872	-6.25553e-12	-6.25553			7.27944	6.99219e-12	6.99219
				2.72136	4.83331e-12							-7.2764	-6.29726e-12	-6.29726			7.27712	5.56049e-12	5.56049
				2.72368	3.03921e-12							-7.27408	-4.78211e-12	-4.78211			7.2748	7.03869e-12	7.03869
				2.726	2.92358e-12							-7.27176	-4.07281e-12	-4.07281			7.27248	7.01484e-12	7.01484
				2.72832	3.51963e-12							-7.26944	-4.97642e-12	-4.97642			7.27016	7.67646e-12	7.67646
				2.73064	3.17631e-12							-7.26712	-4.66767e-12	-4.66767			7.26784	7.14955e-12	7.14955
				2.73296	2.49324e-12							-7.2648	-5.18742e-12	-5.18742			7.26552	8.61225e-12	8.61225
				2.73528	2.35138e-12							-7.26248	-5.13497e-12	-5.13497			7.2632	7.31525e-12	7.31525
				2.7376	2.32992e-12							-7.26016	-3.29199e-12	-3.29199			7.26088	7.50956e-12	7.50956
				2.73992	2.84014e-12							-7.25784	-4.80356e-12	-4.80356			7.25856	6.37469e-12	6.37469
				2.74224	4.34813e-12							-7.25552	-5.84665e-12	-5.84665			7.25624	4.42443e-12	4.42443
				2.74456	3.45406e-12							-7.2532	-4.99311e-12	-4.99311			7.25392	7.23181e-12	7.23181
				2.74688	4.9108e-12							-7.25088	-4.55084e-12	-4.55084			7.2516	6.19111e-12	6.19111
				2.7492	4.85e-12							-7.24856	-5.13735e-12	-5.13735			7.24928	6.16846e-12	6.16846
				2.75152	4.04653e-12							-7.24624	-5.80969e-12	-5.80969			7.24696	5.14564e-12	5.14564
				2.75384	6.34727e-12							-7.24392	-6.09102e-12	-6.09102			7.24464	7.3379e-12	7.3379
				2.75616	4.76417e-12							-7.2416	-6.86112e-12	-6.86112			7.24232	9.28221e-12	9.28221
				2.75848	5.40552e-12							-7.23928	-5.66664e-12	-5.66664			7.24	6.52132e-12	6.52132
				2.7608	3.69725e-12							-7.23696	-4.62952e-12	-4.62952			7.23768	8.9508e-12	8.9508
				2.76312	2.79007e-12							-7.23464	-4.62594e-12	-4.62594			7.23536	6.12912e-12	6.12912
				2.76544	1.91865e-12							-7.23232	-4.50196e-12	-4.50196			7.23304	5.33042e-12	5.33042
				2.76776	3.04637e-12							-7.23	-5.95274e-12	-5.95274			7.23072	6.51059e-12	6.51059
				2.77008	3.39565e-12							-7.22768	-6.27222e-12	-6.27222			7.2284	8.65159e-12	8.65159
				2.7724	3.42188e-12							-7.22536	-6.81224e-12	-6.81224			7.22608	9.17015e-12	9.17015
				2.77472	4.27184e-12							-7.22304	-5.94678e-12	-5.94678			7.22376	7.99832e-12	7.99832
				2.77704	3.00703e-12							-7.22072	-7.04947e-12	-7.04947			7.22144	8.75172e-12	8.75172
				2.77936	2.93669e-12							-7.2184	-6.01115e-12	-6.01115			7.21912	8.98418e-12	8.98418
				2.78168	3.69725e-12							-7.21608	-6.15063e-12	-6.15063			7.2168	9.22379e-12	9.22379
				2.784	3.5542e-12							-7.21376	-4.03109e-12	-4.03109			7.21448	7.36532e-12	7.36532
				2.78632	2.03428e-12							-7.21144	-5.14212e-12	-5.14212			7.21216	7.81355e-12	7.81355
				2.78864	5.96223e-12							-7.20912	-4.74873e-12	-4.74873			7.20984	7.22584e-12	7.22584
				2.79096	6.2674e-12							-7.2068	-4.71654e-12	-4.71654			7.20752	5.11226e-12	5.11226
				2.79328	4.41727e-12							-7.20448	-3.66154e-12	-3.66154			7.2052	8.14495e-12	8.14495
				2.7956	3.49698e-12							-7.20216	-5.78585e-12	-5.78585			7.20288	9.44075e-12	9.44075
				2.79792	4.37794e-12							-7.19984	-4.56753e-12	-4.56753			7.20056	8.88166e-12	8.88166
				2.80024	5.76195e-12							-7.19752	-6.47249e-12	-6.47249			7.19824	7.32121e-12	7.32121
				2.80256	4.40655e-12							-7.1952	-7.22232e-12	-7.22232			7.19592	5.91931e-12	5.91931
				2.80488	2.21548e-12							-7.19288	-6.31275e-12	-6.31275			7.1936	7.60135e-12	7.60135
				2.8072	4.47688e-12							-7.19056	-6.14467e-12	-6.14467			7.19128	7.14597e-12	7.14597
				2.80952	3.80335e-12							-7.18824	-6.17209e-12	-6.17209			7.18896	7.72295e-12	7.72295
				2.81184	2.59814e-12							-7.18592	-6.10771e-12	-6.10771			7.18664	6.41999e-12	6.41999
				2.81416	1.12591e-12							-7.1836	-6.97437e-12	-6.97437			7.18432	7.79209e-12	7.79209
				2.81648	2.6792e-12							-7.18128	-6.17209e-12	-6.17209			7.182	8.33807e-12	8.33807
				2.8188	4.82735e-12							-7.17896	-6.36401e-12	-6.36401			7.17968	8.9961e-12	8.9961
				2.82112	5.0157e-12							-7.17664	-7.35345e-12	-7.35345			7.17736	7.55009e-12	7.55009
				2.82344	5.07531e-12							-7.17432	-8.26779e-12	-8.26779			7.17504	7.69195e-12	7.69195
				2.82576	3.19061e-12							-7.172	-5.59631e-12	-5.59631			7.17272	6.26502e-12	6.26502
				2.82808	2.60052e-12							-7.16968	-5.92413e-12	-5.92413			7.1704	6.2078e-12	6.2078
				2.8304	1.92818e-12							-7.16736	-6.85396e-12	-6.85396			7.16808	7.33909e-12	7.33909
				2.83272	4.5031e-12							-7.16504	-6.07195e-12	-6.07195			7.16576	7.0816e-12	7.0816
				2.83504	4.31237e-12							-7.16272	-3.9536e-12	-3.9536			7.16344	6.51178e-12	6.51178
				2.83736	3.84149e-12							-7.1604	-5.27921e-12	-5.27921			7.16112	7.57274e-12	7.57274
				2.83968	4.06203e-12							-7.15808	-5.72386e-12	-5.72386			7.1588	5.37572e-12	5.37572
				2.842	2.55046e-12							-7.15576	-7.34749e-12	-7.34749			7.15648	4.34932e-12	4.34932
				2.84432	2.91524e-12							-7.15344	-6.71926e-12	-6.71926			7.15416	7.86361e-12	7.86361
				2.84664	3.88798e-12							-7.15112	-6.79436e-12	-6.79436			7.15184	8.23436e-12	8.23436
				2.84896	2.05455e-12							-7.1488	-6.56309e-12	-6.56309			7.14952	8.43582e-12	8.43582
				2.85128	3.86414e-12							-7.14648	-6.01115e-12	-6.01115			7.1472	7.25803e-12	7.25803
				2.8536	4.49476e-12							-7.14416	-6.96721e-12	-6.96721			7.14488	7.69553e-12	7.69553
				2.85592	6.70013e-12							-7.14184	-5.39007e-12	-5.39007			7.14256	7.95541e-12	7.95541
				2.85824	5.47943e-12							-7.13952	-4.5568e-12	-4.5568			7.14024	7.29618e-12	7.29618
				2.86056	5.22432e-12							-7.1372	-4.34222e-12	-4.34222			7.13792	6.62145e-12	6.62145
				2.86288	3.31101e-12							-7.13488	-5.33405e-12	-5.33405			7.1356	7.96852e-12	7.96852
				2.8652	1.95679e-12							-7.13256	-5.62968e-12	-5.62968			7.13328	8.48589e-12	8.48589
				2.86752	3.03445e-12							-7.13024	-6.91714e-12	-6.91714			7.13096	5.83825e-12	5.83825
				2.86984	3.97978e-12							-7.12792	-4.17652e-12	-4.17652			7.12864	6.65245e-12	6.65245
				2.87216	3.73182e-12							-7.1256	-4.00725e-12	-4.00725			7.12632	6.83245e-12	6.83245
				2.87448	3.68295e-12							-7.12328	-5.96824e-12	-5.96824			7.124	7.79209e-12	7.79209
				2.8768	3.58162e-12							-7.12096	-4.06327e-12	-4.06327			7.12168	5.72738e-12	5.72738
				2.87912	3.89991e-12							-7.11864	-2.46587e-12	-2.46587			7.11936	6.83126e-12	6.83126
				2.88144	4.5031e-12							-7.11632	-3.55306e-12	-3.55306			7.11704	6.22329e-12	6.22329
				2.88376	4.60086e-12							-7.114	-4.29812e-12	-4.29812			7.11472	6.04806e-12	6.04806
				2.88608	4.59132e-12							-7.11168	-4.38276e-12	-4.38276			7.1124	6.59642e-12	6.59642
				2.8884	3.69606e-12							-7.10936	-6.4713e-12	-6.4713			7.11008	7.06849e-12	7.06849
				2.89072	4.28853e-12							-7.10704	-7.26285e-12	-7.26285			7.10776	7.35698e-12	7.35698
				2.89304	5.18021e-12							-7.10472	-6.60005e-12	-6.60005			7.10544	6.38304e-12	6.38304
				2.89536	5.41625e-12							-7.1024	-7.19729e-12	-7.19729			7.10312	7.07087e-12	7.07087
				2.89768	3.90348e-12							-7.10008	-4.88463e-12	-4.88463			7.1008	6.42476e-12	6.42476
				2.9	3.61261e-12							-7.09776	-4.48289e-12	-4.48289			7.09848	6.22926e-12	6.22926
				2.90232	4.74033e-12							-7.09544	-5.9885e-12	-5.9885			7.09616	5.90858e-12	5.90858
				2.90464	5.14207e-12							-7.09312	-5.93486e-12	-5.93486			7.09384	5.45559e-12	5.45559
				2.90696	5.34949e-12							-7.0908	-4.51389e-12	-4.51389			7.09152	6.16488e-12	6.16488
				2.90928	4.85358e-12							-7.08848	-5.6726e-12	-5.6726			7.0892	4.90961e-12	4.90961
				2.9116	4.92391e-12							-7.08616	-5.1147e-12	-5.1147			7.08688	5.28631e-12	5.28631
				2.91392	4.13713e-12							-7.08384	-5.55697e-12	-5.55697			7.08456	6.18157e-12	6.18157
				2.91624	3.67937e-12							-7.08152	-6.60958e-12	-6.60958			7.08224	7.1424e-12	7.1424
				2.91856	4.84285e-12							-7.0792	-5.87883e-12	-5.87883			7.07992	6.2078e-12	6.2078
				2.92088	5.31611e-12							-7.07688	-6.06599e-12	-6.06599			7.0776	6.64768e-12	6.64768
				2.9232	3.24783e-12							-7.07456	-5.01576e-12	-5.01576			7.07528	7.74798e-12	7.74798
				2.92552	3.39684e-12							-7.07224	-6.93622e-12	-6.93622			7.07296	7.79328e-12	7.79328
				2.92784	3.61976e-12							-7.06992	-4.33984e-12	-4.33984			7.07064	5.64155e-12	5.64155
				2.93016	4.82259e-12							-7.0676	-4.76899e-12	-4.76899			7.06832	6.78119e-12	6.78119
				2.93248	4.23727e-12							-7.06528	-4.79045e-12	-4.79045			7.066	6.66318e-12	6.66318
				2.9348	3.16915e-12							-7.06296	-9.23934e-12	-9.23934			7.06368	7.6395e-12	7.6395
				2.93712	3.98216e-12							-7.06064	-5.94917e-12	-5.94917			7.06136	6.6751e-12	6.6751
				2.93944	2.42052e-12							-7.05832	-5.72148e-12	-5.72148			7.05904	5.64275e-12	5.64275
				2.94176	3.62096e-12							-7.056	-6.19831e-12	-6.19831			7.05672	6.54397e-12	6.54397
				2.94408	4.89054e-12							-7.05368	-5.19934e-12	-5.19934			7.0544	6.32105e-12	6.32105
				2.9464	3.15246e-12							-7.05136	-5.83353e-12	-5.83353			7.05208	6.34489e-12	6.34489
				2.94872	3.11551e-12							-7.04904	-7.71704e-12	-7.71704			7.04976	6.5082e-12	6.5082
				2.95104	4.76894e-12							-7.04672	-4.88105e-12	-4.88105			7.04744	7.05895e-12	7.05895
				2.95336	5.55691e-12							-7.0444	-5.4914e-12	-5.4914			7.04512	7.413e-12	7.413
				2.95568	3.46598e-12							-7.04208	-5.29709e-12	-5.29709			7.0428	7.08995e-12	7.08995
				2.958	5.75599e-12							-7.03976	-5.00384e-12	-5.00384			7.04048	7.48691e-12	7.48691
				2.96032	4.02746e-12							-7.03744	-6.72045e-12	-6.72045			7.03816	7.57513e-12	7.57513
				2.96264	3.49221e-12							-7.03512	-4.99668e-12	-4.99668			7.03584	6.72874e-12	6.72874
				2.96496	3.81527e-12							-7.0328	-5.76558e-12	-5.76558			7.03352	7.0065e-12	7.0065
				2.96728	2.72689e-12							-7.03048	-6.13632e-12	-6.13632			7.0312	8.40363e-12	8.40363
				2.9696	5.94911e-12							-7.02816	-4.22302e-12	-4.22302			7.02888	7.8815e-12	7.8815
				2.97192	4.99306e-12							-7.02584	-5.22795e-12	-5.22795			7.02656	6.07905e-12	6.07905
				2.97424	3.55778e-12							-7.02352	-4.17533e-12	-4.17533			7.02424	7.14955e-12	7.14955
				2.97656	4.17886e-12							-7.0212	-5.74413e-12	-5.74413			7.02192	7.34863e-12	7.34863
				2.97888	5.79057e-12							-7.01888	-7.82433e-12	-7.82433			7.0196	7.17339e-12	7.17339
				2.9812	2.55165e-12							-7.01656	-7.32961e-12	-7.32961			7.01728	5.71189e-12	5.71189
				2.98352	4.94895e-12							-7.01424	-5.04079e-12	-5.04079			7.01496	8.67543e-12	8.67543
				2.98584	5.44247e-12							-7.01192	-4.34461e-12	-4.34461			7.01264	7.66215e-12	7.66215
				2.98816	5.29227e-12							-7.0096	-4.87747e-12	-4.87747			7.01032	8.05793e-12	8.05793
				2.99048	6.38661e-12							-7.00728	-6.68826e-12	-6.68826			7.008	8.71596e-12	8.71596
				2.9928	3.7652e-12							-7.00496	-4.76184e-12	-4.76184			7.00568	7.55009e-12	7.55009
				2.99512	4.10256e-12							-7.00264	-2.81515e-12	-2.81515			7.00336	5.57122e-12	5.57122
				2.99744	4.98829e-12							-7.00032	-5.27206e-12	-5.27206			7.00104	7.29499e-12	7.29499
				2.99976	4.97279e-12							-6.998	-3.98698e-12	-3.98698			6.99872	7.42135e-12	7.42135
				3.00208	4.64854e-12							-6.99568	-3.95122e-12	-3.95122			6.9964	7.03749e-12	7.03749
				3.0044	3.92375e-12							-6.99336	-3.81294e-12	-3.81294			6.99408	6.16488e-12	6.16488
				3.00672	4.64496e-12							-6.99104	-4.90012e-12	-4.90012			6.99176	6.45694e-12	6.45694
				3.00904	3.11432e-12							-6.98872	-5.28875e-12	-5.28875			6.98944	5.92766e-12	5.92766
				3.01136	2.96411e-12							-6.9864	-2.70906e-12	-2.70906			6.98712	3.44095e-12	3.44095
				3.01368	4.93822e-12							-6.98408	-4.50554e-12	-4.50554			6.9848	5.95507e-12	5.95507
				3.016	3.32532e-12							-6.98176	-7.80168e-12	-7.80168			6.98248	6.97789e-12	6.97789
				3.01832	4.84881e-12							-6.97944	-7.81956e-12	-7.81956			6.98016	9.20949e-12	9.20949
				3.02064	5.44605e-12							-6.97712	-5.23033e-12	-5.23033			6.97784	9.69467e-12	9.69467
				3.02296	4.65212e-12							-6.9748	-6.66681e-12	-6.66681			6.97552	9.51943e-12	9.51943
				3.02528	5.20763e-12							-6.97248	-4.64621e-12	-4.64621			6.9732	7.60493e-12	7.60493
				3.0276	6.37827e-12							-6.97016	-5.20292e-12	-5.20292			6.97088	6.67391e-12	6.67391
				3.02992	4.69622e-12							-6.96784	-4.0144e-12	-4.0144			6.96856	6.22568e-12	6.22568
				3.03224	4.93941e-12							-6.96552	-4.7976e-12	-4.7976			6.96624	7.32598e-12	7.32598
				3.03456	5.45439e-12							-6.9632	-4.17533e-12	-4.17533			6.96392	6.62384e-12	6.62384
				3.03688	4.51264e-12							-6.96088	-5.4318e-12	-5.4318			6.9616	5.38883e-12	5.38883
				3.0392	3.68891e-12							-6.95856	-4.94423e-12	-4.94423			6.95928	6.17203e-12	6.17203
				3.04152	5.13134e-12							-6.95624	-4.98357e-12	-4.98357			6.95696	6.17203e-12	6.17203
				3.04384	4.99186e-12							-6.95392	-7.14841e-12	-7.14841			6.95464	6.84914e-12	6.84914
				3.04616	3.93448e-12							-6.9516	-4.71535e-12	-4.71535			6.95232	6.99935e-12	6.99935
				3.04848	2.62913e-12							-6.94928	-5.34597e-12	-5.34597			6.95	5.66778e-12	5.66778
				3.0508	2.34542e-12							-6.94696	-7.08165e-12	-7.08165			6.94768	5.72738e-12	5.72738
				3.05312	1.44419e-12							-6.94464	-5.60346e-12	-5.60346			6.94536	6.13985e-12	6.13985
				3.05544	4.98948e-12							-6.94232	-7.39279e-12	-7.39279			6.94304	6.42595e-12	6.42595
				3.05776	5.34949e-12							-6.94	-6.57025e-12	-6.57025			6.94072	6.32581e-12	6.32581
				3.06008	4.39343e-12							-6.93768	-3.96552e-12	-3.96552			6.9384	6.92067e-12	6.92067
				3.0624	5.63917e-12							-6.93536	-4.86555e-12	-4.86555			6.93608	7.74202e-12	7.74202
				3.06472	5.47108e-12							-6.93304	-4.62475e-12	-4.62475			6.93376	6.82649e-12	6.82649
				3.06704	5.80606e-12							-6.93072	-4.66409e-12	-4.66409			6.93144	5.9658e-12	5.9658
				3.06936	6.00276e-12							-6.9284	-6.19831e-12	-6.19831			6.92912	5.43532e-12	5.43532
				3.07168	2.92239e-12							-6.92608	-5.86691e-12	-5.86691			6.9268	6.33893e-12	6.33893
				3.074	4.08826e-12							-6.92376	-7.20205e-12	-7.20205			6.92448	8.37025e-12	8.37025
				3.07632	5.38406e-12							-6.92144	-5.4461e-12	-5.4461			6.92216	5.92527e-12	5.92527
				3.07864	7.87315e-12							-6.91912	-3.9989e-12	-3.9989			6.91984	6.77762e-12	6.77762
				3.08096	3.99289e-12							-6.9168	-5.88241e-12	-5.88241			6.91752	6.35442e-12	6.35442
				3.08328	3.55778e-12							-6.91448	-7.11384e-12	-7.11384			6.9152	5.01809e-12	5.01809
				3.0856	6.76808e-12							-6.91216	-6.10533e-12	-6.10533			6.91288	4.30403e-12	4.30403
				3.08792	5.34472e-12							-6.90984	-5.27444e-12	-5.27444			6.91056	6.65483e-12	6.65483
				3.09024	4.50072e-12							-6.90752	-6.08268e-12	-6.08268			6.90824	6.74543e-12	6.74543
				3.09256	2.81152e-12							-6.9052	-5.73459e-12	-5.73459			6.90592	7.73487e-12	7.73487
				3.09488	2.56357e-12							-6.90288	-6.26626e-12	-6.26626			6.9036	7.89223e-12	7.89223
				3.0972	4.9263e-12							-6.90056	-6.0803e-12	-6.0803			6.90128	9.16538e-12	9.16538
				3.09952	3.45526e-12							-6.89824	-5.31974e-12	-5.31974			6.89896	7.77421e-12	7.77421
				3.10184	4.42681e-12							-6.89592	-6.57859e-12	-6.57859			6.89664	5.46632e-12	5.46632
				3.10416	6.38304e-12							-6.8936	-5.79777e-12	-5.79777			6.89432	6.47006e-12	6.47006
				3.10648	6.15177e-12							-6.89128	-7.91254e-12	-7.91254			6.892	7.27234e-12	7.27234
				3.1088	5.47466e-12							-6.88896	-5.51644e-12	-5.51644			6.88968	6.46529e-12	6.46529
				3.11112	5.95865e-12							-6.88664	-6.60243e-12	-6.60243			6.88736	7.15193e-12	7.15193
				3.11344	5.48897e-12							-6.88432	-6.50349e-12	-6.50349			6.88504	8.36787e-12	8.36787
				3.11576	4.41847e-12							-6.882	-4.59137e-12	-4.59137			6.88272	8.02097e-12	8.02097
				3.11808	3.12981e-12							-6.87968	-2.8831e-12	-2.8831			6.8804	6.53205e-12	6.53205
				3.1204	1.15094e-12							-6.87736	-6.11725e-12	-6.11725			6.87808	5.81083e-12	5.81083
				3.12272	2.87947e-12							-6.87504	-6.30679e-12	-6.30679			6.87576	6.49628e-12	6.49628
				3.12504	2.8008e-12							-6.87272	-5.62611e-12	-5.62611			6.87344	6.86941e-12	6.86941
				3.12736	2.85682e-12							-6.8704	-5.2506e-12	-5.2506			6.87112	7.52387e-12	7.52387
				3.12968	2.91524e-12							-6.86808	-5.85976e-12	-5.85976			6.8688	5.77984e-12	5.77984
				3.132	2.17495e-12							-6.86576	-5.17311e-12	-5.17311			6.86648	6.98504e-12	6.98504
				3.13432	5.89785e-12							-6.86344	-5.41272e-12	-5.41272			6.86416	6.73709e-12	6.73709
				3.13664	5.74288e-12							-6.86112	-2.93675e-12	-2.93675			6.86184	7.48811e-12	7.48811
				3.13896	4.15978e-12							-6.8588	-4.44832e-12	-4.44832			6.85952	7.76467e-12	7.76467
				3.14128	3.38969e-12							-6.85648	-2.89502e-12	-2.89502			6.8572	8.58245e-12	8.58245
				3.1436	2.71497e-12							-6.85416	-2.28348e-12	-2.28348			6.85488	6.52609e-12	6.52609
				3.14592	4.59609e-12							-6.85184	-2.74124e-12	-2.74124			6.85256	6.82888e-12	6.82888
				3.14824	3.15962e-12							-6.84952	-3.86539e-12	-3.86539			6.85024	7.56321e-12	7.56321
				3.15056	3.05233e-12							-6.8472	-4.75588e-12	-4.75588			6.84792	5.60698e-12	5.60698
				3.15288	4.26826e-12							-6.84488	-5.14689e-12	-5.14689			6.8456	8.61344e-12	8.61344
				3.1552	2.53854e-12							-6.84256	-5.69525e-12	-5.69525			6.84328	6.42237e-12	6.42237
				3.15752	4.54721e-12							-6.84024	-4.3911e-12	-4.3911			6.84096	6.97789e-12	6.97789
				3.15984	4.28853e-12							-6.83792	-4.46978e-12	-4.46978			6.83864	7.50241e-12	7.50241
				3.16216	2.69589e-12							-6.8356	-4.11811e-12	-4.11811			6.83632	6.73113e-12	6.73113
				3.16448	3.46718e-12							-6.83328	-2.45991e-12	-2.45991			6.834	6.73232e-12	6.73232
				3.1668	4.1276e-12							-6.83096	-3.58405e-12	-3.58405			6.83168	6.62265e-12	6.62265
				3.16912	5.44009e-12							-6.82864	-4.23017e-12	-4.23017			6.82936	7.06372e-12	7.06372
				3.17144	4.9263e-12							-6.82632	-4.36964e-12	-4.36964			6.82704	6.38304e-12	6.38304
				3.17376	5.55691e-12							-6.824	-5.97897e-12	-5.97897			6.82472	6.27575e-12	6.27575
				3.17608	7.89938e-12							-6.82168	-5.90506e-12	-5.90506			6.8224	4.24323e-12	4.24323
				3.1784	5.91812e-12							-6.81936	-6.45819e-12	-6.45819			6.82008	6.00753e-12	6.00753
				3.18072	4.25992e-12							-6.81704	-3.65677e-12	-3.65677			6.81776	6.50463e-12	6.50463
				3.18304	4.68192e-12							-6.81472	-5.90506e-12	-5.90506			6.81544	5.55215e-12	5.55215
				3.18536	3.05233e-12							-6.8124	-7.1353e-12	-7.1353			6.81312	5.77268e-12	5.77268
				3.18768	5.02524e-12							-6.81008	-7.02563e-12	-7.02563			6.8108	7.82785e-12	7.82785
				3.19	4.03938e-12							-6.80776	-7.94831e-12	-7.94831			6.80848	6.40211e-12	6.40211
				3.19232	4.87385e-12							-6.80544	-5.47471e-12	-5.47471			6.80616	5.30061e-12	5.30061
				3.19464	3.38015e-12							-6.80312	-4.91324e-12	-4.91324			6.80384	5.21478e-12	5.21478
				3.19696	5.13611e-12							-6.8008	-2.64468e-12	-2.64468			6.80152	5.73573e-12	5.73573
				3.19928	2.93908e-12							-6.79848	-4.3303e-12	-4.3303			6.7992	7.02438e-12	7.02438
				3.2016	3.27883e-12							-6.79616	-5.0551e-12	-5.0551			6.79688	7.39274e-12	7.39274
				3.20392	3.24902e-12							-6.79384	-5.15642e-12	-5.15642			6.79456	6.17323e-12	6.17323
				3.20624	3.33128e-12							-6.79152	-5.45683e-12	-5.45683			6.79224	6.61549e-12	6.61549
				3.20856	4.96564e-12							-6.7892	-5.79658e-12	-5.79658			6.78992	5.061e-12	5.061
				3.21088	4.32667e-12							-6.78688	-4.92158e-12	-4.92158			6.7876	6.0862e-12	6.0862
				3.2132	3.75685e-12							-6.78456	-4.64382e-12	-4.64382			6.78528	6.39376e-12	6.39376
				3.21552	5.18021e-12							-6.78224	-2.27633e-12	-2.27633			6.78296	5.92289e-12	5.92289
				3.21784	4.00243e-12							-6.77992	-2.9737e-12	-2.9737			6.78064	5.74169e-12	5.74169
				3.22016	5.97534e-12							-6.7776	-5.2649e-12	-5.2649			6.77832	5.72262e-12	5.72262
				3.22248	3.39923e-12							-6.77528	-4.48766e-12	-4.48766			6.776	6.98623e-12	6.98623
				3.2248	5.52115e-12							-6.77296	-6.94933e-12	-6.94933			6.77368	5.94673e-12	5.94673
				3.22712	4.88338e-12							-6.77064	-5.80492e-12	-5.80492			6.77136	7.49764e-12	7.49764
				3.22944	4.23727e-12							-6.76832	-4.49362e-12	-4.49362			6.76904	6.77166e-12	6.77166
				3.23176	5.91097e-12							-6.766	-3.53995e-12	-3.53995			6.76672	6.48317e-12	6.48317
				3.23408	5.96342e-12							-6.76368	-4.84767e-12	-4.84767			6.7644	6.389e-12	6.389
				3.2364	4.2933e-12							-6.76136	-4.24566e-12	-4.24566			6.76208	8.82683e-12	8.82683
				3.23872	5.36976e-12							-6.75904	-3.78552e-12	-3.78552			6.75976	7.95064e-12	7.95064
				3.24104	5.32803e-12							-6.75672	-1.99976e-12	-1.99976			6.75744	7.10425e-12	7.10425
				3.24336	2.52065e-12							-6.7544	-3.64843e-12	-3.64843			6.75512	8.1974e-12	8.1974
				3.24568	3.62692e-12							-6.75208	-5.63565e-12	-5.63565			6.7528	7.1114e-12	7.1114
				3.248	3.64003e-12							-6.74976	-5.83472e-12	-5.83472			6.75048	6.15177e-12	6.15177
				3.25032	3.4791e-12							-6.74744	-5.49855e-12	-5.49855			6.74816	6.59165e-12	6.59165
				3.25264	3.6901e-12							-6.74512	-5.29471e-12	-5.29471			6.74584	7.03392e-12	7.03392
				3.25496	3.05948e-12							-6.7428	-5.01337e-12	-5.01337			6.74352	6.7955e-12	6.7955
				3.25728	3.88679e-12							-6.74048	-5.371e-12	-5.371			6.7412	6.08978e-12	6.08978
				3.2596	6.5535e-12							-6.73816	-5.3257e-12	-5.3257			6.73888	7.06253e-12	7.06253
				3.26192	5.97176e-12							-6.73584	-4.80476e-12	-4.80476			6.73656	6.41641e-12	6.41641
				3.26424	4.87146e-12							-6.73352	-6.38428e-12	-6.38428			6.73424	5.8609e-12	5.8609
				3.26656	5.02166e-12							-6.7312	-4.15387e-12	-4.15387			6.73192	6.07667e-12	6.07667
				3.26888	5.21002e-12							-6.72888	-2.40627e-12	-2.40627			6.7296	7.43088e-12	7.43088
				3.2712	4.05726e-12							-6.72656	-1.49551e-12	-1.49551			6.72728	7.24134e-12	7.24134
				3.27352	5.87282e-12							-6.72424	-2.79131e-12	-2.79131			6.72496	5.89428e-12	5.89428
				3.27584	6.42833e-12							-6.72192	-4.69508e-12	-4.69508			6.72264	6.10766e-12	6.10766
				3.27816	5.76672e-12							-6.7196	-4.54488e-12	-4.54488			6.72032	5.77984e-12	5.77984
				3.28048	6.53324e-12							-6.71728	-3.66869e-12	-3.66869			6.718	6.45456e-12	6.45456
				3.2828	6.42595e-12							-6.71496	-5.88956e-12	-5.88956			6.71568	6.67629e-12	6.67629
				3.28512	7.3832e-12							-6.71264	-5.3257e-12	-5.3257			6.71336	7.21154e-12	7.21154
				3.28744	5.11703e-12							-6.71032	-4.1956e-12	-4.1956			6.71104	6.19707e-12	6.19707
				3.28976	4.80828e-12							-6.708	-3.71042e-12	-3.71042			6.70872	4.04176e-12	4.04176
				3.29208	7.32479e-12							-6.70568	-5.46041e-12	-5.46041			6.7064	4.35767e-12	4.35767
				3.2944	7.23657e-12							-6.70336	-5.88122e-12	-5.88122			6.70408	4.30879e-12	4.30879
				3.29672	5.44247e-12							-6.70104	-4.09546e-12	-4.09546			6.70176	7.00531e-12	7.00531
				3.29904	5.45797e-12							-6.69872	-2.1297e-12	-2.1297			6.69944	6.52728e-12	6.52728
				3.30136	5.2422e-12							-6.6964	-2.67806e-12	-2.67806			6.69712	6.12316e-12	6.12316
				3.30368	3.99408e-12							-6.69408	-4.38156e-12	-4.38156			6.6948	6.34846e-12	6.34846
				3.306	4.12879e-12							-6.69176	-4.83217e-12	-4.83217			6.69248	4.73914e-12	4.73914
				3.30832	3.77474e-12							-6.68944	-4.63071e-12	-4.63071			6.69016	6.0719e-12	6.0719
				3.31064	6.05283e-12							-6.68712	-4.47693e-12	-4.47693			6.68784	6.37231e-12	6.37231
				3.31296	5.52115e-12							-6.6848	-4.60925e-12	-4.60925			6.68552	5.42578e-12	5.42578
				3.31528	6.23879e-12							-6.68248	-4.42209e-12	-4.42209			6.6832	5.61652e-12	5.61652
				3.3176	6.5082e-12							-6.68016	-5.49379e-12	-5.49379			6.68088	6.13746e-12	6.13746
				3.31992	5.38525e-12							-6.67784	-4.97642e-12	-4.97642			6.67856	6.28052e-12	6.28052
				3.32224	6.34131e-12							-6.67552	-6.07314e-12	-6.07314			6.67624	7.42492e-12	7.42492
				3.32456	4.45661e-12							-6.6732	-6.08387e-12	-6.08387			6.67392	6.06594e-12	6.06594
				3.32688	7.64308e-12							-6.67088	-4.41017e-12	-4.41017			6.6716	4.15621e-12	4.15621
				3.3292	7.655e-12							-6.66856	-4.59256e-12	-4.59256			6.66928	6.35562e-12	6.35562
				3.33152	7.33313e-12							-6.66624	-3.61386e-12	-3.61386			6.66696	5.95507e-12	5.95507
				3.33384	6.18992e-12							-6.66392	-4.12169e-12	-4.12169			6.66464	6.47959e-12	6.47959
				3.33616	6.24833e-12							-6.6616	-4.98953e-12	-4.98953			6.66232	6.4784e-12	6.4784
				3.33848	5.68208e-12							-6.65928	-3.85585e-12	-3.85585			6.66	8.13303e-12	8.13303
				3.3408	5.07889e-12							-6.65696	-6.43673e-12	-6.43673			6.65768	5.89428e-12	5.89428
				3.34312	4.67953e-12							-6.65464	-6.43792e-12	-6.43792			6.65536	4.85835e-12	4.85835
				3.34544	5.27558e-12							-6.65232	-3.44935e-12	-3.44935			6.65304	5.01213e-12	5.01213
				3.34776	7.41062e-12							-6.65	-3.67584e-12	-3.67584			6.65072	7.52268e-12	7.52268
				3.35008	5.69639e-12							-6.64768	-4.56157e-12	-4.56157			6.6484	7.18889e-12	7.18889
				3.3524	5.31969e-12							-6.64536	-3.68657e-12	-3.68657			6.64608	8.0913e-12	8.0913
				3.35472	5.94673e-12							-6.64304	-3.66154e-12	-3.66154			6.64376	7.3081e-12	7.3081
				3.35704	5.05624e-12							-6.64072	-5.01337e-12	-5.01337			6.64144	8.14376e-12	8.14376
				3.35936	4.9406e-12							-6.6384	-3.0047e-12	-3.0047			6.63912	7.06491e-12	7.06491
				3.36168	3.79143e-12							-6.63608	-2.78535e-12	-2.78535			6.6368	3.14173e-12	3.14173
				3.364	6.27217e-12							-6.63376	-4.43878e-12	-4.43878			6.63448	6.39972e-12	6.39972
				3.36632	5.44724e-12							-6.63144	-3.90711e-12	-3.90711			6.63216	3.54705e-12	3.54705
				3.36864	6.08501e-12							-6.62912	-3.79267e-12	-3.79267			6.62984	5.49254e-12	5.49254
				3.37096	4.87861e-12							-6.6268	-4.77972e-12	-4.77972			6.62752	6.19349e-12	6.19349
				3.37328	5.26366e-12							-6.62448	-4.82383e-12	-4.82383			6.6252	5.48777e-12	5.48777
				3.3756	4.90484e-12							-6.62216	-4.20633e-12	-4.20633			6.62288	6.5082e-12	6.5082
				3.37792	3.37062e-12							-6.61984	-2.99278e-12	-2.99278			6.62056	7.79686e-12	7.79686
				3.38024	3.43976e-12							-6.61752	-4.0287e-12	-4.0287			6.61824	6.12674e-12	6.12674
				3.38256	3.15604e-12							-6.6152	-1.56942e-12	-1.56942			6.61592	3.80335e-12	3.80335
				3.38488	4.27422e-12							-6.61288	-2.15354e-12	-2.15354			6.6136	4.43754e-12	4.43754
				3.3872	4.57821e-12							-6.61056	-3.87254e-12	-3.87254			6.61128	6.59165e-12	6.59165
				3.38952	4.07395e-12							-6.60824	-5.80015e-12	-5.80015			6.60896	7.02915e-12	7.02915
				3.39184	2.83298e-12							-6.60592	-2.90814e-12	-2.90814			6.60664	6.17203e-12	6.17203
				3.39416	3.64718e-12							-6.6036	-3.12152e-12	-3.12152			6.60432	4.6843e-12	4.6843
				3.39648	4.92272e-12							-6.60128	-3.94168e-12	-3.94168			6.602	6.56543e-12	6.56543
				3.3988	5.34949e-12							-6.59896	-3.64127e-12	-3.64127			6.59968	6.25787e-12	6.25787
				3.40112	4.70814e-12							-6.59664	-4.2099e-12	-4.2099			6.59736	5.01094e-12	5.01094
				3.40344	5.66897e-12							-6.59432	-4.32196e-12	-4.32196			6.59504	6.98981e-12	6.98981
				3.40576	4.73318e-12							-6.592	-4.13242e-12	-4.13242			6.59272	5.44724e-12	5.44724
				3.40808	5.45916e-12							-6.58968	-4.61879e-12	-4.61879			6.5904	4.23965e-12	4.23965
				3.4104	4.5937e-12							-6.58736	-3.39689e-12	-3.39689			6.58808	5.84898e-12	5.84898
				3.41272	5.33995e-12							-6.58504	-3.79625e-12	-3.79625			6.58576	6.45694e-12	6.45694
				3.41504	3.62811e-12							-6.58272	-3.12987e-12	-3.12987			6.58344	5.54857e-12	5.54857
				3.41736	4.00719e-12							-6.5804	-4.60687e-12	-4.60687			6.58112	6.31509e-12	6.31509
				3.41968	4.7296e-12							-6.57808	-4.71297e-12	-4.71297			6.5788	4.68073e-12	4.68073
				3.422	4.88577e-12							-6.57576	-4.35653e-12	-4.35653			6.57648	5.38525e-12	5.38525
				3.42432	4.99425e-12							-6.57344	-3.47319e-12	-3.47319			6.57416	6.57973e-12	6.57973
				3.42664	6.15296e-12							-6.57112	-5.35431e-12	-5.35431			6.57184	5.0765e-12	5.0765
				3.42896	5.10392e-12							-6.5688	-7.23305e-12	-7.23305			6.56952	4.56509e-12	4.56509
				3.43128	4.7749e-12							-6.56648	-6.21977e-12	-6.21977			6.5672	7.51433e-12	7.51433
				3.4336	4.80709e-12							-6.56416	-4.86078e-12	-4.86078			6.56488	8.80775e-12	8.80775
				3.43592	5.8001e-12							-6.56184	-5.01218e-12	-5.01218			6.56256	6.50344e-12	6.50344
				3.43824	6.57854e-12							-6.55952	-5.44253e-12	-5.44253			6.56024	6.93378e-12	6.93378
				3.44056	5.89666e-12							-6.5572	-5.81088e-12	-5.81088			6.55792	5.70354e-12	5.70354
				3.44288	3.79858e-12							-6.55488	-4.16579e-12	-4.16579			6.5556	4.87861e-12	4.87861
				3.4452	5.36976e-12							-6.55256	-3.82366e-12	-3.82366			6.55328	6.67033e-12	6.67033
				3.44752	5.45082e-12							-6.55024	-4.32911e-12	-4.32911			6.55096	6.82053e-12	6.82053
				3.44984	6.26025e-12							-6.54792	-2.85092e-12	-2.85092			6.54864	6.04329e-12	6.04329
				3.45216	4.71291e-12							-6.5456	-2.66376e-12	-2.66376			6.54632	8.65755e-12	8.65755
				3.45448	4.49476e-12							-6.54328	-4.26951e-12	-4.26951			6.544	7.8815e-12	7.8815
				3.4568	4.61993e-12							-6.54096	-3.66273e-12	-3.66273			6.54168	5.21955e-12	5.21955
				3.45912	4.81186e-12							-6.53864	-3.3361e-12	-3.3361			6.53936	6.09932e-12	6.09932
				3.46144	4.4888e-12							-6.53632	-4.47574e-12	-4.47574			6.53704	5.20644e-12	5.20644
				3.46376	3.46598e-12							-6.534	-4.53058e-12	-4.53058			6.53472	5.80368e-12	5.80368
				3.46608	4.31475e-12							-6.53168	-5.9742e-12	-5.9742			6.5324	6.83961e-12	6.83961
				3.4684	3.88679e-12							-6.52936	-5.32689e-12	-5.32689			6.53008	6.10289e-12	6.10289
				3.47072	7.68242e-12							-6.52704	-4.93231e-12	-4.93231			6.52776	7.27591e-12	7.27591
				3.47304	5.47585e-12							-6.52472	-4.23255e-12	-4.23255			6.52544	8.34522e-12	8.34522
				3.47536	4.49595e-12							-6.5224	-4.62713e-12	-4.62713			6.52312	7.94587e-12	7.94587
				3.47768	4.02865e-12							-6.52008	-5.49736e-12	-5.49736			6.5208	7.96971e-12	7.96971
				3.48	4.21223e-12							-6.51776	-5.62611e-12	-5.62611			6.51848	8.0162e-12	8.0162
				3.48232	5.40671e-12							-6.51544	-2.75912e-12	-2.75912			6.51616	6.92663e-12	6.92663
				3.48464	3.72109e-12							-6.51312	-4.09308e-12	-4.09308			6.51384	7.35221e-12	7.35221
				3.48696	4.47926e-12							-6.5108	-5.54981e-12	-5.54981			6.51152	5.91097e-12	5.91097
				3.48928	3.46122e-12							-6.50848	-4.67959e-12	-4.67959			6.5092	5.09915e-12	5.09915
				3.4916	3.95236e-12							-6.50616	-4.76661e-12	-4.76661			6.50688	5.6797e-12	5.6797
				3.49392	4.9561e-12							-6.50384	-4.55322e-12	-4.55322			6.50456	7.16982e-12	7.16982
				3.49624	5.82752e-12							-6.50152	-3.94764e-12	-3.94764			6.50224	6.03614e-12	6.03614
				3.49856	3.58996e-12							-6.4992	-4.71893e-12	-4.71893			6.49992	5.56645e-12	5.56645
				3.50088	4.82139e-12							-6.49688	-4.72608e-12	-4.72608			6.4976	5.84659e-12	5.84659
				3.5032	5.94196e-12							-6.49456	-5.46398e-12	-5.46398			6.49528	5.89547e-12	5.89547
				3.50552	4.2933e-12							-6.49224	-4.3613e-12	-4.3613			6.49296	7.35578e-12	7.35578
				3.50784	6.31509e-12							-6.48992	-4.50196e-12	-4.50196			6.49064	5.72381e-12	5.72381
				3.51016	3.61261e-12							-6.4876	-3.36948e-12	-3.36948			6.48832	5.79533e-12	5.79533
				3.51248	3.8403e-12							-6.48528	-2.58627e-12	-2.58627			6.486	5.92885e-12	5.92885
				3.5148	6.18872e-12							-6.48296	-3.00112e-12	-3.00112			6.48368	5.70593e-12	5.70593
				3.51712	3.36585e-12							-6.48064	-4.88463e-12	-4.88463			6.48136	4.74152e-12	4.74152
				3.51944	5.07173e-12							-6.47832	-4.60568e-12	-4.60568			6.47904	4.88219e-12	4.88219
				3.52176	3.2228e-12							-6.476	-4.04659e-12	-4.04659			6.47672	4.60682e-12	4.60682
				3.52408	4.11091e-12							-6.47368	-2.95582e-12	-2.95582			6.4744	5.32565e-12	5.32565
				3.5264	3.54347e-12							-6.47136	-4.23017e-12	-4.23017			6.47208	7.73964e-12	7.73964
				3.52872	6.42714e-12							-6.46904	-6.25434e-12	-6.25434			6.46976	8.47397e-12	8.47397
				3.53104	7.01723e-12							-6.46672	-4.72012e-12	-4.72012			6.46744	9.06405e-12	9.06405
				3.53336	4.84404e-12							-6.4644	-5.88002e-12	-5.88002			6.46512	4.82139e-12	4.82139
				3.53568	4.55436e-12							-6.46208	-6.20904e-12	-6.20904			6.4628	5.22909e-12	5.22909
				3.538	3.03802e-12							-6.45976	-4.25878e-12	-4.25878			6.46048	4.84881e-12	4.84881
				3.54032	4.85239e-12							-6.45744	-3.89161e-12	-3.89161			6.45816	6.94451e-12	6.94451
				3.54264	2.7543e-12							-6.45512	-5.98493e-12	-5.98493			6.45584	5.53307e-12	5.53307
				3.54496	2.11057e-12							-6.4528	-3.3957e-12	-3.3957			6.45352	5.54499e-12	5.54499
				3.54728	2.30846e-12							-6.45048	-4.48647e-12	-4.48647			6.4512	5.19452e-12	5.19452
				3.5496	5.12418e-12							-6.44816	-3.65916e-12	-3.65916			6.44888	5.71308e-12	5.71308
				3.55192	6.32343e-12							-6.44584	-2.8831e-12	-2.8831			6.44656	2.77099e-12	2.77099
				3.55424	5.10154e-12							-6.44352	-3.49941e-12	-3.49941			6.44424	4.77848e-12	4.77848
				3.55656	5.32684e-12							-6.4412	-3.5614e-12	-3.5614			6.44192	4.74629e-12	4.74629
				3.55888	4.52218e-12							-6.43888	-3.37424e-12	-3.37424			6.4396	5.06935e-12	5.06935
				3.5612	3.31936e-12							-6.43656	-5.1743e-12	-5.1743			6.43728	5.47466e-12	5.47466
				3.56352	4.77609e-12							-6.43424	-3.66512e-12	-3.66512			6.43496	6.55231e-12	6.55231
				3.56584	2.48489e-12							-6.43192	-4.48051e-12	-4.48051			6.43264	6.94928e-12	6.94928
				3.56816	3.02372e-12							-6.4296	-3.36471e-12	-3.36471			6.43032	6.70609e-12	6.70609
				3.57048	3.02372e-12							-6.42728	-4.08712e-12	-4.08712			6.428	4.67953e-12	4.67953
				3.5728	6.35442e-12							-6.42496	-5.79062e-12	-5.79062			6.42568	5.7846e-12	5.7846
				3.57512	4.91557e-12							-6.42264	-4.63906e-12	-4.63906			6.42336	7.70864e-12	7.70864
				3.57744	4.82378e-12							-6.42032	-3.41001e-12	-3.41001			6.42104	9.26552e-12	9.26552
				3.57976	3.57446e-12							-6.418	-3.90949e-12	-3.90949			6.41872	7.74917e-12	7.74917
				3.58208	5.8609e-12							-6.41568	-3.30391e-12	-3.30391			6.4164	4.39224e-12	4.39224
				3.5844	3.76282e-12							-6.41336	-3.2002e-12	-3.2002			6.41408	6.25787e-12	6.25787
				3.58672	5.56884e-12							-6.41104	-3.97506e-12	-3.97506			6.41176	7.93633e-12	7.93633
				3.58904	4.05726e-12							-6.40872	-4.32673e-12	-4.32673			6.40944	7.10187e-12	7.10187
				3.59136	1.90792e-12							-6.4064	-5.31259e-12	-5.31259			6.40712	4.63662e-12	4.63662
				3.59368	2.96888e-12							-6.40408	-5.57127e-12	-5.57127			6.4048	4.87385e-12	4.87385
				3.596	5.32446e-12							-6.40176	-3.63174e-12	-3.63174			6.40248	5.91931e-12	5.91931
				3.59832	4.78325e-12							-6.39944	-3.40762e-12	-3.40762			6.40016	6.92067e-12	6.92067
				3.60064	3.87368e-12							-6.39712	-3.90353e-12	-3.90353			6.39784	5.02643e-12	5.02643
				3.60296	5.24578e-12							-6.3948	-2.43845e-12	-2.43845			6.39552	5.34234e-12	5.34234
				3.60528	6.46052e-12							-6.39248	-2.3109e-12	-2.3109			6.3932	4.49834e-12	4.49834
				3.6076	6.48317e-12							-6.39016	-2.49329e-12	-2.49329			6.39088	6.41522e-12	6.41522
				3.60992	5.67493e-12							-6.38784	-2.54932e-12	-2.54932			6.38856	6.18872e-12	6.18872
				3.61224	4.79398e-12							-6.38552	-3.27411e-12	-3.27411			6.38624	5.22909e-12	5.22909
				3.61456	6.44502e-12							-6.3832	-2.88668e-12	-2.88668			6.38392	6.79192e-12	6.79192
				3.61688	6.73351e-12							-6.38088	-3.34921e-12	-3.34921			6.3816	5.29942e-12	5.29942
				3.6192	6.51417e-12							-6.37856	-3.18113e-12	-3.18113			6.37928	5.16352e-12	5.16352
				3.62152	5.47824e-12							-6.37624	-2.75316e-12	-2.75316			6.37696	5.78818e-12	5.78818
				3.62384	6.08382e-12							-6.37392	-3.38021e-12	-3.38021			6.37464	6.78715e-12	6.78715
				3.62616	3.98335e-12							-6.3716	-1.78995e-12	-1.78995			6.37232	5.01928e-12	5.01928
				3.62848	5.51758e-12							-6.36928	-3.13225e-12	-3.13225			6.37	6.83245e-12	6.83245
				3.6308	4.20508e-12							-6.36696	-3.85347e-12	-3.85347			6.36768	7.0673e-12	7.0673
				3.63312	5.26008e-12							-6.36464	-5.11351e-12	-5.11351			6.36536	3.61619e-12	3.61619
				3.63544	5.65347e-12							-6.36232	-5.12424e-12	-5.12424			6.36304	3.45049e-12	3.45049
				3.63776	3.81288e-12							-6.36	-3.46484e-12	-3.46484			6.36072	7.42612e-12	7.42612
				3.64008	6.40449e-12							-6.35768	-5.07179e-12	-5.07179			6.3584	6.00514e-12	6.00514
				3.6424	3.22041e-12							-6.35536	-3.57809e-12	-3.57809			6.35608	8.14972e-12	8.14972
				3.64472	5.5438e-12							-6.35304	-4.45786e-12	-4.45786			6.35376	7.12929e-12	7.12929
				3.64704	4.881e-12							-6.35072	-4.61164e-12	-4.61164			6.35144	5.59745e-12	5.59745
				3.64936	4.96564e-12							-6.3484	-4.61283e-12	-4.61283			6.34912	6.00872e-12	6.00872
				3.65168	5.43055e-12							-6.34608	-4.14314e-12	-4.14314			6.3468	6.93974e-12	6.93974
				3.654	5.78222e-12							-6.34376	-3.71161e-12	-3.71161			6.34448	7.20081e-12	7.20081
				3.65632	8.44655e-12							-6.34144	-4.40064e-12	-4.40064			6.34216	7.20796e-12	7.20796
				3.65864	6.56662e-12							-6.33912	-5.42941e-12	-5.42941			6.33984	5.82633e-12	5.82633
				3.66096	3.78308e-12							-6.3368	-3.77479e-12	-3.77479			6.33752	5.8299e-12	5.8299
				3.66328	5.15041e-12							-6.33448	-3.65916e-12	-3.65916			6.3352	5.02643e-12	5.02643
				3.6656	4.43039e-12							-6.33216	-5.30544e-12	-5.30544			6.33288	5.4985e-12	5.4985
				3.66792	7.47976e-12							-6.32984	-3.3957e-12	-3.3957			6.33056	5.41267e-12	5.41267
				3.67024	6.97312e-12							-6.32752	-3.25384e-12	-3.25384			6.32824	6.0564e-12	6.0564
				3.67256	6.30078e-12							-6.3252	-5.42345e-12	-5.42345			6.32592	5.59983e-12	5.59983
				3.67488	6.20065e-12							-6.32288	-5.24345e-12	-5.24345			6.3236	5.7858e-12	5.7858
				3.6772	3.4028e-12							-6.32056	-3.23835e-12	-3.23835			6.32128	4.76298e-12	4.76298
				3.67952	6.08024e-12							-6.31824	-6.41766e-12	-6.41766			6.31896	5.56288e-12	5.56288
				3.68184	2.98795e-12							-6.31592	-4.82741e-12	-4.82741			6.31664	7.05061e-12	7.05061
				3.68416	4.15144e-12							-6.3136	-3.14775e-12	-3.14775			6.31432	6.28767e-12	6.28767
				3.68648	4.30641e-12							-6.31128	-2.04268e-12	-2.04268			6.312	5.95865e-12	5.95865
				3.6888	3.90944e-12							-6.30896	-3.44339e-12	-3.44339			6.30968	4.46138e-12	4.46138
				3.69112	6.80027e-12							-6.30664	-3.47438e-12	-3.47438			6.30736	6.29959e-12	6.29959
				3.69344	5.5295e-12							-6.30432	-2.51713e-12	-2.51713			6.30504	5.23028e-12	5.23028
				3.69576	5.64036e-12							-6.302	-2.29659e-12	-2.29659			6.30272	5.6499e-12	5.6499
				3.69808	4.93226e-12							-6.29968	-3.5769e-12	-3.5769			6.3004	3.95355e-12	3.95355
				3.7004	2.33469e-12							-6.29736	-6.74906e-12	-6.74906			6.29808	3.88202e-12	3.88202
				3.70272	6.2984e-12							-6.29504	-3.10602e-12	-3.10602			6.29576	6.26025e-12	6.26025
				3.70504	6.43787e-12							-6.29272	-4.90251e-12	-4.90251			6.29344	6.01349e-12	6.01349
				3.70736	5.23743e-12							-6.2904	-5.84188e-12	-5.84188			6.29112	6.01349e-12	6.01349
				3.70968	3.77831e-12							-6.28808	-4.66886e-12	-4.66886			6.2888	4.86073e-12	4.86073
				3.712	6.05521e-12							-6.28576	-3.68777e-12	-3.68777			6.28648	3.99766e-12	3.99766
				3.71432	6.87895e-12							-6.28344	-2.20242e-12	-2.20242			6.28416	3.40876e-12	3.40876
				3.71664	6.74305e-12							-6.28112	-3.05476e-12	-3.05476			6.28184	4.67953e-12	4.67953
				3.71896	6.91113e-12							-6.2788	-4.87747e-12	-4.87747			6.27952	5.28631e-12	5.28631
				3.72128	5.44605e-12							-6.27648	-3.86539e-12	-3.86539			6.2772	6.17323e-12	6.17323
				3.7236	4.5031e-12							-6.27416	-2.60773e-12	-2.60773			6.27488	7.6252e-12	7.6252
				3.72592	5.84659e-12							-6.27184	-4.30527e-12	-4.30527			6.27256	5.06935e-12	5.06935
				3.72824	4.21223e-12							-6.26952	-4.10857e-12	-4.10857			6.27024	4.34932e-12	4.34932
				3.73056	4.34694e-12							-6.2672	-5.1898e-12	-5.1898			6.26792	6.9767e-12	6.9767
				3.73288	1.56102e-12							-6.26488	-4.75469e-12	-4.75469			6.2656	7.00531e-12	7.00531
				3.7352	3.3587e-12							-6.26256	-5.49617e-12	-5.49617			6.26328	7.4893e-12	7.4893
				3.73752	4.70695e-12							-6.26024	-5.29232e-12	-5.29232			6.26096	6.28767e-12	6.28767
				3.73984	4.10971e-12							-6.25792	-4.49004e-12	-4.49004			6.25864	4.45304e-12	4.45304
				3.74216	4.88577e-12							-6.2556	-3.98936e-12	-3.98936			6.25632	4.66881e-12	4.66881
				3.74448	3.84626e-12							-6.25328	-2.64588e-12	-2.64588			6.254	5.73215e-12	5.73215
				3.7468	3.86653e-12							-6.25096	-2.7019e-12	-2.7019			6.25168	5.89309e-12	5.89309
				3.74912	5.13491e-12							-6.24864	-6.16136e-12	-6.16136			6.24936	4.85835e-12	4.85835
				3.75144	4.42204e-12							-6.24632	-6.55713e-12	-6.55713			6.24704	4.41966e-12	4.41966
				3.75376	3.56493e-12							-6.244	-3.66392e-12	-3.66392			6.24472	4.84762e-12	4.84762
				3.75608	2.84371e-12							-6.24168	-3.63054e-12	-3.63054			6.2424	5.85971e-12	5.85971
				3.7584	4.8512e-12							-6.23936	-5.19338e-12	-5.19338			6.24008	6.02064e-12	6.02064
				3.76072	4.91676e-12							-6.23704	-5.2196e-12	-5.2196			6.23776	7.62281e-12	7.62281
				3.76304	3.79858e-12							-6.23472	-5.72744e-12	-5.72744			6.23544	7.42135e-12	7.42135
				3.76536	2.69947e-12							-6.2324	-6.11367e-12	-6.11367			6.23312	5.88951e-12	5.88951
				3.76768	4.15978e-12							-6.23008	-5.91936e-12	-5.91936			6.2308	4.87265e-12	4.87265
				3.77	5.09319e-12							-6.22776	-4.02632e-12	-4.02632			6.22848	5.19213e-12	5.19213
				3.77232	5.37452e-12							-6.22544	-2.69833e-12	-2.69833			6.22616	5.27081e-12	5.27081
				3.77464	6.75974e-12							-6.22312	-3.60551e-12	-3.60551			6.22384	3.90706e-12	3.90706
				3.77696	5.3173e-12							-6.2208	-5.04914e-12	-5.04914			6.22152	4.19316e-12	4.19316
				3.77928	5.44367e-12							-6.21848	-5.83234e-12	-5.83234			6.2192	4.33621e-12	4.33621
				3.7816	4.42323e-12							-6.21616	-4.23732e-12	-4.23732			6.21688	6.4784e-12	6.4784
				3.78392	5.7846e-12							-6.21384	-3.27649e-12	-3.27649			6.21456	5.51638e-12	5.51638
				3.78624	4.14905e-12							-6.21152	-5.10516e-12	-5.10516			6.21224	5.13253e-12	5.13253
				3.78856	5.72262e-12							-6.2092	-5.20768e-12	-5.20768			6.20992	4.91318e-12	4.91318
				3.79088	5.43532e-12							-6.20688	-4.37679e-12	-4.37679			6.2076	5.45201e-12	5.45201
				3.7932	4.92987e-12							-6.20456	-4.26355e-12	-4.26355			6.20528	5.13134e-12	5.13134
				3.79552	4.75106e-12							-6.20224	-5.24822e-12	-5.24822			6.20296	4.43635e-12	4.43635
				3.79784	3.70917e-12							-6.19992	-5.38411e-12	-5.38411			6.20064	5.52473e-12	5.52473
				3.80016	6.34012e-12							-6.1976	-6.48084e-12	-6.48084			6.19832	6.51417e-12	6.51417
				3.80248	6.3878e-12							-6.19528	-4.84648e-12	-4.84648			6.196	5.59745e-12	5.59745
				3.8048	4.51145e-12							-6.19296	-4.67839e-12	-4.67839			6.19368	6.06475e-12	6.06475
				3.80712	3.68652e-12							-6.19064	-4.36249e-12	-4.36249			6.19136	6.69298e-12	6.69298
				3.80944	5.69043e-12							-6.18832	-5.22318e-12	-5.22318			6.18904	5.45082e-12	5.45082
				3.81176	5.48301e-12							-6.186	-6.27103e-12	-6.27103			6.18672	6.6751e-12	6.6751
				3.81408	4.62947e-12							-6.18368	-5.35431e-12	-5.35431			6.1844	6.20541e-12	6.20541
				3.8164	5.73334e-12							-6.18136	-4.18964e-12	-4.18964			6.18208	5.42817e-12	5.42817
				3.81872	4.35052e-12							-6.17904	-4.86913e-12	-4.86913			6.17976	5.10392e-12	5.10392
				3.82104	4.7594e-12							-6.17672	-4.49481e-12	-4.49481			6.17744	4.23131e-12	4.23131
				3.82336	4.11448e-12							-6.1744	-6.88615e-12	-6.88615			6.17512	2.78649e-12	2.78649
				3.82568	3.3122e-12							-6.17208	-6.55236e-12	-6.55236			6.1728	4.99306e-12	4.99306
				3.828	4.87265e-12							-6.16976	-6.1852e-12	-6.1852			6.17048	5.58672e-12	5.58672
				3.83032	4.55079e-12							-6.16744	-5.57962e-12	-5.57962			6.16816	6.11124e-12	6.11124
				3.83264	6.56662e-12							-6.16512	-4.68435e-12	-4.68435			6.16584	6.80146e-12	6.80146
				3.83496	5.60698e-12							-6.1628	-5.26848e-12	-5.26848			6.16352	6.46767e-12	6.46767
				3.83728	5.48658e-12							-6.16048	-6.31275e-12	-6.31275			6.1612	5.18141e-12	5.18141
				3.8396	3.13101e-12							-6.15816	-4.98238e-12	-4.98238			6.15888	3.06306e-12	3.06306
				3.84192	5.17664e-12							-6.15584	-3.20974e-12	-3.20974			6.15656	3.58996e-12	3.58996
				3.84424	4.58536e-12							-6.15352	-6.60005e-12	-6.60005			6.15424	4.29926e-12	4.29926
				3.84656	3.81765e-12							-6.1512	-6.55594e-12	-6.55594			6.15192	6.03375e-12	6.03375
				3.84888	5.37452e-12							-6.14888	-5.36862e-12	-5.36862			6.1496	5.51758e-12	5.51758
				3.8512	5.23863e-12							-6.14656	-6.96364e-12	-6.96364			6.14728	5.39717e-12	5.39717
				3.85352	6.2674e-12							-6.14424	-6.08626e-12	-6.08626			6.14496	5.89785e-12	5.89785
				3.85584	7.42254e-12							-6.14192	-4.81787e-12	-4.81787			6.14264	4.46257e-12	4.46257
				3.85816	6.11005e-12							-6.1396	-5.63684e-12	-5.63684			6.14032	5.37929e-12	5.37929
				3.86048	4.84524e-12							-6.13728	-3.64366e-12	-3.64366			6.138	3.46598e-12	3.46598
				3.8628	5.68447e-12							-6.13496	-2.93317e-12	-2.93317			6.13568	3.7497e-12	3.7497
				3.86512	5.9217e-12							-6.13264	-3.32418e-12	-3.32418			6.13336	3.89871e-12	3.89871
				3.86744	5.90381e-12							-6.13032	-4.97284e-12	-4.97284			6.13104	3.22518e-12	3.22518
				3.86976	5.30658e-12							-6.128	-5.06582e-12	-5.06582			6.12872	5.68447e-12	5.68447
				3.87208	6.71205e-12							-6.12568	-2.59104e-12	-2.59104			6.1264	5.74288e-12	5.74288
				3.8744	5.22909e-12							-6.12336	-3.2908e-12	-3.2908			6.12408	4.61516e-12	4.61516
				3.87672	4.69026e-12							-6.12104	-2.21553e-12	-2.21553			6.12176	6.31389e-12	6.31389
				3.87904	3.51605e-12							-6.11872	-2.3705e-12	-2.3705			6.11944	4.48403e-12	4.48403
				3.88136	5.33757e-12							-6.1164	-5.4461e-12	-5.4461			6.11712	4.8512e-12	4.8512
				3.88368	6.84318e-12							-6.11408	-5.12662e-12	-5.12662			6.1148	5.73454e-12	5.73454
				3.886	4.52456e-12							-6.11176	-2.92483e-12	-2.92483			6.11248	5.07173e-12	5.07173
				3.88832	5.32446e-12							-6.10944	-3.55783e-12	-3.55783			6.11016	5.84063e-12	5.84063
				3.89064	4.69503e-12							-6.10712	-3.55664e-12	-3.55664			6.10784	6.03852e-12	6.03852
				3.89296	4.76656e-12							-6.1048	-5.64399e-12	-5.64399			6.10552	5.03716e-12	5.03716
				3.89528	5.29942e-12							-6.10248	-4.03705e-12	-4.03705			6.1032	5.10511e-12	5.10511
				3.8976	5.23624e-12							-6.10016	-4.90132e-12	-4.90132			6.10088	3.02729e-12	3.02729
				3.89992	4.52933e-12							-6.09784	-3.49941e-12	-3.49941			6.09856	6.47363e-12	6.47363
				3.90224	6.19468e-12							-6.09552	-4.86913e-12	-4.86913			6.09624	4.6855e-12	4.6855
				3.90456	5.28035e-12							-6.0932	-4.44594e-12	-4.44594			6.09392	5.74884e-12	5.74884
				3.90688	4.90484e-12							-6.09088	-2.51832e-12	-2.51832			6.0916	6.3735e-12	6.3735
				3.9092	3.6901e-12							-6.08856	-3.07741e-12	-3.07741			6.08928	4.56748e-12	4.56748
				3.91152	4.60562e-12							-6.08624	-2.56601e-12	-2.56601			6.08696	5.25651e-12	5.25651
				3.91384	5.69758e-12							-6.08392	-5.39842e-12	-5.39842			6.08464	6.15535e-12	6.15535
				3.91616	4.82497e-12							-6.0816	-5.07298e-12	-5.07298			6.08232	5.54142e-12	5.54142
				3.91848	4.25396e-12							-6.07928	-4.1503e-12	-4.1503			6.08	5.20882e-12	5.20882
				3.9208	5.99561e-12							-6.07696	-4.60329e-12	-4.60329			6.07768	4.43635e-12	4.43635
				3.92312	6.7955e-12							-6.07464	-2.63515e-12	-2.63515			6.07536	5.26485e-12	5.26485
				3.92544	4.99425e-12							-6.07232	-4.13122e-12	-4.13122			6.07304	5.6499e-12	5.6499
				3.92776	4.70218e-12							-6.07	-2.82707e-12	-2.82707			6.07072	4.61993e-12	4.61993
				3.93008	4.87981e-12							-6.06768	-2.85926e-12	-2.85926			6.0684	5.78699e-12	5.78699
				3.9324	4.59966e-12							-6.06536	-4.4817e-12	-4.4817			6.06608	6.23879e-12	6.23879
				3.93472	6.95166e-12							-6.06304	-3.82724e-12	-3.82724			6.06376	4.19078e-12	4.19078
				3.93704	6.25906e-12							-6.06072	-4.39587e-12	-4.39587			6.06144	3.61738e-12	3.61738
				3.93936	6.20065e-12							-6.0584	-5.24106e-12	-5.24106			6.05912	5.48658e-12	5.48658
				3.94168	5.86209e-12							-6.05608	-3.81532e-12	-3.81532			6.0568	5.48897e-12	5.48897
				3.944	5.72381e-12							-6.05376	-4.12765e-12	-4.12765			6.05448	5.0312e-12	5.0312
				3.94632	3.66745e-12							-6.05144	-4.87867e-12	-4.87867			6.05216	4.1121e-12	4.1121
				3.94864	5.44963e-12							-6.04912	-5.05152e-12	-5.05152			6.04984	5.75242e-12	5.75242
				3.95096	2.94385e-12							-6.0468	-3.97506e-12	-3.97506			6.04752	6.07428e-12	6.07428
				3.95328	3.56612e-12							-6.04448	-4.24686e-12	-4.24686			6.0452	5.30419e-12	5.30419
				3.9556	4.58774e-12							-6.04216	-3.82605e-12	-3.82605			6.04288	4.428e-12	4.428
				3.95792	3.93924e-12							-6.03984	-6.10771e-12	-6.10771			6.04056	4.31118e-12	4.31118
				3.96024	5.09438e-12							-6.03752	-5.85737e-12	-5.85737			6.03824	5.24697e-12	5.24697
				3.96256	4.54244e-12							-6.0352	-4.31838e-12	-4.31838			6.03592	4.79517e-12	4.79517
				3.96488	5.36856e-12							-6.03288	-4.4972e-12	-4.4972			6.0336	3.52082e-12	3.52082
				3.9672	4.94418e-12							-6.03056	-5.62849e-12	-5.62849			6.03128	3.92375e-12	3.92375
				3.96952	5.53426e-12							-6.02824	-6.50587e-12	-6.50587			6.02896	4.61993e-12	4.61993
				3.97184	5.24935e-12							-6.02592	-3.20497e-12	-3.20497			6.02664	4.53171e-12	4.53171
				3.97416	4.89888e-12							-6.0236	-3.80101e-12	-3.80101			6.02432	4.7141e-12	4.7141
				3.97648	7.04822e-12							-6.02128	-4.50554e-12	-4.50554			6.022	4.52218e-12	4.52218
				3.9788	5.94554e-12							-6.01896	-4.15268e-12	-4.15268			6.01968	3.25975e-12	3.25975
				3.98112	5.04551e-12							-6.01664	-3.82366e-12	-3.82366			6.01736	5.20644e-12	5.20644
				3.98344	5.3638e-12							-6.01432	-3.16563e-12	-3.16563			6.01504	6.3282e-12	6.3282
				3.98576	4.20508e-12							-6.012	-2.23937e-12	-2.23937			6.01272	4.37555e-12	4.37555
				3.98808	5.30419e-12							-6.00968	-4.08354e-12	-4.08354			6.0104	3.37658e-12	3.37658
				3.9904	4.22058e-12							-6.00736	-2.40388e-12	-2.40388			6.00808	3.67222e-12	3.67222
				3.99272	6.19111e-12							-6.00504	-2.59581e-12	-2.59581			6.00576	3.96547e-12	3.96547
				3.99504	7.37486e-12							-6.00272	-3.73545e-12	-3.73545			6.00344	5.85375e-12	5.85375
				3.99736	5.60341e-12							-6.0004	-3.76525e-12	-3.76525			6.00112	4.16813e-12	4.16813
				3.99968	6.04329e-12							-5.99808	-3.81532e-12	-3.81532			5.9988	5.13849e-12	5.13849
				4.002	7.20439e-12							-5.99576	-2.46468e-12	-2.46468			5.99648	6.03614e-12	6.03614
				4.00432	7.93276e-12							-5.99344	-3.97506e-12	-3.97506			5.99416	6.59165e-12	6.59165
				4.00664	5.50804e-12							-5.99112	-3.95718e-12	-3.95718			5.99184	5.3483e-12	5.3483
				4.00896	5.43413e-12							-5.9888	-2.35501e-12	-2.35501			5.98952	6.27932e-12	6.27932
				4.01128	5.56288e-12							-5.98648	-3.23239e-12	-3.23239			5.9872	7.07206e-12	7.07206
				4.0136	6.94213e-12							-5.98416	-1.99738e-12	-1.99738			5.98488	5.05862e-12	5.05862
				4.01592	5.66301e-12							-5.98184	-3.82724e-12	-3.82724			5.98256	5.05624e-12	5.05624
				4.01824	6.33297e-12							-5.97952	-4.41256e-12	-4.41256			5.98024	5.11703e-12	5.11703
				4.02056	6.74662e-12							-5.9772	-2.22984e-12	-2.22984			5.97792	5.05981e-12	5.05981
				4.02288	5.12895e-12							-5.97488	-2.10586e-12	-2.10586			5.9756	4.83927e-12	4.83927
				4.0252	6.53205e-12							-5.97256	-2.59342e-12	-2.59342			5.97328	4.29687e-12	4.29687
				4.02752	5.22909e-12							-5.97024	-4.09546e-12	-4.09546			5.97096	6.62861e-12	6.62861
				4.02984	8.4382e-12							-5.96792	-3.62101e-12	-3.62101			5.96864	5.46989e-12	5.46989
				4.03216	8.50496e-12							-5.9656	-5.58319e-12	-5.58319			5.96632	4.47092e-12	4.47092
				4.03448	7.56082e-12							-5.96328	-3.38736e-12	-3.38736			5.964	5.5748e-12	5.5748
				4.0368	5.74169e-12							-5.96096	-2.81754e-12	-2.81754			5.96168	7.56321e-12	7.56321
				4.03912	5.95388e-12							-5.95864	-3.29914e-12	-3.29914			5.95936	6.76093e-12	6.76093
				4.04144	5.61652e-12							-5.95632	-1.92347e-12	-1.92347			5.95704	5.4842e-12	5.4842
				4.04376	6.71563e-12							-5.954	-1.7828e-12	-1.7828			5.95472	4.85716e-12	4.85716
				4.04608	6.42833e-12							-5.95168	-3.39809e-12	-3.39809			5.9524	4.09183e-12	4.09183
				4.0484	5.95507e-12							-5.94936	-4.72727e-12	-4.72727			5.95008	3.77712e-12	3.77712
				4.05072	3.99527e-12							-5.94704	-2.07963e-12	-2.07963			5.94776	5.21359e-12	5.21359
				4.05304	5.04789e-12							-5.94472	-3.49703e-12	-3.49703			5.94544	4.27899e-12	4.27899
				4.05536	5.99561e-12							-5.9424	-1.20225e-12	-1.20225			5.94312	6.2531e-12	6.2531
				4.05768	6.27932e-12							-5.94008	-2.4766e-12	-2.4766			5.9408	4.5496e-12	4.5496
				4.06	5.5295e-12							-5.93776	-3.90711e-12	-3.90711			5.93848	4.5794e-12	4.5794
				4.06232	4.91318e-12							-5.93544	-4.42448e-12	-4.42448			5.93616	5.82752e-12	5.82752
				4.06464	4.74748e-12							-5.93312	-4.6331e-12	-4.6331			5.93384	7.08399e-12	7.08399
				4.06696	6.00753e-12							-5.9308	-2.49329e-12	-2.49329			5.93152	4.75106e-12	4.75106
				4.06928	4.36721e-12							-5.92848	-4.03228e-12	-4.03228			5.9292	4.91795e-12	4.91795
				4.0716	4.40655e-12							-5.92616	-3.91307e-12	-3.91307			5.92688	4.93345e-12	4.93345
				4.07392	5.25174e-12							-5.92384	-3.22285e-12	-3.22285			5.92456	1.43943e-12	1.43943
				4.07624	3.85103e-12							-5.92152	-6.15897e-12	-6.15897			5.92224	2.90928e-12	2.90928
				4.07856	3.51486e-12							-5.9192	-4.11215e-12	-4.11215			5.91992	4.9716e-12	4.9716
				4.08088	5.56764e-12							-5.91688	-4.59614e-12	-4.59614			5.9176	4.60443e-12	4.60443
				4.0832	3.94759e-12							-5.91456	-2.4456e-12	-2.4456			5.91528	2.25482e-12	2.25482
				4.08552	3.59592e-12							-5.91224	-1.78757e-12	-1.78757			5.91296	3.09286e-12	3.09286
				4.08784	4.56867e-12							-5.90992	-2.00095e-12	-2.00095			5.91064	4.40058e-12	4.40058
				4.09016	4.43277e-12							-5.9076	-1.75181e-12	-1.75181			5.90832	5.84898e-12	5.84898
				4.09248	3.82361e-12							-5.90528	-3.05476e-12	-3.05476			5.906	4.19554e-12	4.19554
				4.0948	5.31969e-12							-5.90296	-2.75674e-12	-2.75674			5.90368	5.03359e-12	5.03359
				4.09712	5.23743e-12							-5.90064	-3.11794e-12	-3.11794			5.90136	5.42936e-12	5.42936
				4.09944	3.90348e-12							-5.89832	-1.43113e-12	-1.43113			5.89904	3.89991e-12	3.89991
				4.10176	4.68907e-12							-5.896	-1.58491e-12	-1.58491			5.89672	3.61619e-12	3.61619
				4.10408	7.37962e-12							-5.89368	-2.99993e-12	-2.99993			5.8944	3.98335e-12	3.98335
				4.1064	7.51672e-12							-5.89136	-4.86794e-12	-4.86794			5.89208	4.50906e-12	4.50906
				4.10872	6.26502e-12							-5.88904	-3.11318e-12	-3.11318			5.88976	5.42698e-12	5.42698
				4.11104	8.51688e-12							-5.88672	-3.55425e-12	-3.55425			5.88744	5.51042e-12	5.51042
				4.11336	7.08041e-12							-5.8844	-3.27888e-12	-3.27888			5.88512	7.21988e-12	7.21988
				4.11568	7.24134e-12							-5.88208	-2.84019e-12	-2.84019			5.8828	6.21495e-12	6.21495
				4.118	7.55367e-12							-5.87976	-4.496e-12	-4.496			5.88048	5.14803e-12	5.14803
				4.12032	8.7708e-12							-5.87744	-3.25027e-12	-3.25027			5.87816	4.92511e-12	4.92511
				4.12264	6.8098e-12							-5.87512	-2.74363e-12	-2.74363			5.87584	5.32803e-12	5.32803
				4.12496	4.9561e-12							-5.8728	-5.04318e-12	-5.04318			5.87352	6.30436e-12	6.30436
				4.12728	6.00872e-12							-5.87048	-3.32179e-12	-3.32179			5.8712	4.3827e-12	4.3827
				4.1296	5.48301e-12							-5.86816	-3.61743e-12	-3.61743			5.86888	4.22535e-12	4.22535
				4.13192	6.31628e-12							-5.86584	-2.7937e-12	-2.7937			5.86656	6.20661e-12	6.20661
				4.13424	6.34966e-12							-5.86352	-4.4817e-12	-4.4817			5.86424	7.10306e-12	7.10306
				4.13656	6.47006e-12							-5.8612	-2.17023e-12	-2.17023			5.86192	4.51145e-12	4.51145
				4.13888	6.76689e-12							-5.85888	-2.45276e-12	-2.45276			5.8596	4.42562e-12	4.42562
				4.1412	6.34489e-12							-5.85656	-4.97284e-12	-4.97284			5.85728	5.85136e-12	5.85136
				4.14352	6.05759e-12							-5.85424	-5.38292e-12	-5.38292			5.85496	6.54158e-12	6.54158
				4.14584	4.63304e-12							-5.85192	-4.10142e-12	-4.10142			5.85264	6.54039e-12	6.54039
				4.14816	5.26962e-12							-5.8496	-3.96195e-12	-3.96195			5.85032	5.36737e-12	5.36737
				4.15048	6.28886e-12							-5.84728	-4.64263e-12	-4.64263			5.848	6.34489e-12	6.34489
				4.1528	5.18617e-12							-5.84496	-3.77956e-12	-3.77956			5.84568	5.79891e-12	5.79891
				4.15512	6.21137e-12							-5.84264	-2.75555e-12	-2.75555			5.84336	4.28972e-12	4.28972
				4.15744	4.59251e-12							-5.84032	-2.31924e-12	-2.31924			5.84104	6.13031e-12	6.13031
				4.15976	4.70457e-12							-5.838	-2.62561e-12	-2.62561			5.83872	4.71649e-12	4.71649
				4.16208	5.43532e-12							-5.83568	-3.93453e-12	-3.93453			5.8364	2.75669e-12	2.75669
				4.1644	3.58758e-12							-5.83336	-5.88837e-12	-5.88837			5.83408	5.19094e-12	5.19094
				4.16672	3.26452e-12							-5.83104	-4.84171e-12	-4.84171			5.83176	5.59387e-12	5.59387
				4.16904	4.97041e-12							-5.82872	-4.32077e-12	-4.32077			5.82944	6.15177e-12	6.15177
				4.17136	3.86176e-12							-5.8264	-3.78432e-12	-3.78432			5.82712	5.30419e-12	5.30419
				4.17368	4.63185e-12							-5.82408	-2.79608e-12	-2.79608			5.8248	4.46257e-12	4.46257
				4.176	5.22432e-12							-5.82176	-3.29557e-12	-3.29557			5.82248	3.41234e-12	3.41234
				4.17832	4.86908e-12							-5.81944	-4.24686e-12	-4.24686			5.82016	3.33962e-12	3.33962
				4.18064	3.81884e-12							-5.81712	-3.17755e-12	-3.17755			5.81784	3.75805e-12	3.75805
				4.18296	4.8059e-12							-5.8148	-3.9846e-12	-3.9846			5.81552	4.75225e-12	4.75225
				4.18528	5.29704e-12							-5.81248	-2.04625e-12	-2.04625			5.8132	4.56629e-12	4.56629
				4.1876	4.42323e-12							-5.81016	-2.14877e-12	-2.14877			5.81088	4.28495e-12	4.28495
				4.18992	4.26826e-12							-5.80784	-3.09768e-12	-3.09768			5.80856	5.08961e-12	5.08961
				4.19224	5.67493e-12							-5.80552	-8.64889e-13	-0.864889			5.80624	3.71632e-12	3.71632
				4.19456	6.92067e-12							-5.8032	-2.51713e-12	-2.51713			5.80392	6.27217e-12	6.27217
				4.19688	6.99577e-12							-5.80088	-3.0953e-12	-3.0953			5.8016	5.21955e-12	5.21955
				4.1992	6.83722e-12							-5.79856	-2.70548e-12	-2.70548			5.79928	3.44572e-12	3.44572
				4.20152	4.44588e-12							-5.79624	-3.00708e-12	-3.00708			5.79696	4.63781e-12	4.63781
				4.20384	3.08332e-12							-5.79392	-3.20378e-12	-3.20378			5.79464	6.95762e-12	6.95762
				4.20616	6.42357e-12							-5.7916	-4.08116e-12	-4.08116			5.79232	5.24459e-12	5.24459
				4.20848	5.58672e-12							-5.78928	-4.99549e-12	-4.99549			5.79	6.18396e-12	6.18396
				4.2108	3.59354e-12							-5.78696	-3.92261e-12	-3.92261			5.78768	5.2422e-12	5.2422
				4.21312	3.19538e-12							-5.78464	-2.59223e-12	-2.59223			5.78536	4.46019e-12	4.46019
				4.21544	5.74765e-12							-5.78232	-3.60074e-12	-3.60074			5.78304	2.85086e-12	2.85086
				4.21776	5.83467e-12							-5.78	-3.03211e-12	-3.03211			5.78072	4.0513e-12	4.0513
				4.22008	6.37707e-12							-5.77768	-4.85244e-12	-4.85244			5.7784	2.22025e-12	2.22025
				4.2224	2.06647e-12							-5.77536	-4.24566e-12	-4.24566			5.77608	2.85921e-12	2.85921
				4.22472	4.57582e-12							-5.77304	-4.12765e-12	-4.12765			5.77376	2.74715e-12	2.74715
				4.22704	6.86583e-12							-5.77072	-4.0442e-12	-4.0442			5.77144	3.47552e-12	3.47552
				4.22936	4.00481e-12							-5.7684	-6.20547e-12	-6.20547			5.76912	4.28853e-12	4.28853
				4.23168	6.57854e-12							-5.76608	-3.50776e-12	-3.50776			5.7668	3.96309e-12	3.96309
				4.234	8.17475e-12							-5.76376	-2.91171e-12	-2.91171			5.76448	5.41029e-12	5.41029
				4.23632	6.98504e-12							-5.76144	-3.71757e-12	-3.71757			5.76216	3.98216e-12	3.98216
				4.23864	4.39105e-12							-5.75912	-3.72949e-12	-3.72949			5.75984	4.13236e-12	4.13236
				4.24096	5.30419e-12							-5.7568	-4.13361e-12	-4.13361			5.75752	4.5496e-12	4.5496
				4.24328	4.87265e-12							-5.75448	-5.30663e-12	-5.30663			5.7552	2.97007e-12	2.97007
				4.2456	5.49612e-12							-5.75216	-3.90949e-12	-3.90949			5.75288	4.14548e-12	4.14548
				4.24792	5.92527e-12							-5.74984	-3.34921e-12	-3.34921			5.75056	3.68771e-12	3.68771
				4.25024	5.36499e-12							-5.74752	-3.86658e-12	-3.86658			5.74824	3.50652e-12	3.50652
				4.25256	8.13422e-12							-5.7452	-4.67005e-12	-4.67005			5.74592	5.36618e-12	5.36618
				4.25488	6.79073e-12							-5.74288	-1.86625e-12	-1.86625			5.7436	4.02508e-12	4.02508
				4.2572	6.24356e-12							-5.74056	-3.67823e-12	-3.67823			5.74128	2.29296e-12	2.29296
				4.25952	6.04686e-12							-5.73824	-3.10841e-12	-3.10841			5.73896	2.8008e-12	2.8008
				4.26184	5.02763e-12							-5.73592	-4.07996e-12	-4.07996			5.73664	4.58536e-12	4.58536
				4.26416	5.97296e-12							-5.7336	-4.16937e-12	-4.16937			5.73432	5.95984e-12	5.95984
				4.26648	6.56185e-12							-5.73128	-4.3756e-12	-4.3756			5.732	4.40774e-12	4.40774
				4.2688	5.89547e-12							-5.72896	-5.31855e-12	-5.31855			5.72968	3.25498e-12	3.25498
				4.27112	4.33025e-12							-5.72664	-4.16818e-12	-4.16818			5.72736	1.40724e-12	1.40724
				4.27344	5.17902e-12							-5.72432	-3.15848e-12	-3.15848			5.72504	3.59473e-12	3.59473
				4.27576	4.48642e-12							-5.722	-1.85194e-12	-1.85194			5.72272	3.80692e-12	3.80692
				4.27808	4.91438e-12							-5.71968	-3.06072e-12	-3.06072			5.7204	4.5341e-12	4.5341
				4.2804	6.07071e-12							-5.71736	-3.58644e-12	-3.58644			5.71808	3.25022e-12	3.25022
				4.28272	5.57122e-12							-5.71504	-2.80323e-12	-2.80323			5.71576	4.10375e-12	4.10375
				4.28504	6.25667e-12							-5.71272	-1.86744e-12	-1.86744			5.71344	4.6855e-12	4.6855
				4.28736	3.55539e-12							-5.7104	-1.90797e-12	-1.90797			5.71112	5.514e-12	5.514
				4.28968	4.46853e-12							-5.70808	-2.16785e-12	-2.16785			5.7088	2.4539e-12	2.4539
				4.292	5.56407e-12							-5.70576	-2.50759e-12	-2.50759			5.70648	3.36108e-12	3.36108
				4.29432	7.58466e-12							-5.70344	-4.02036e-12	-4.02036			5.70416	4.14071e-12	4.14071
				4.29664	4.15144e-12							-5.70112	-4.1944e-12	-4.1944			5.70184	4.2468e-12	4.2468
				4.29896	4.3827e-12							-5.6988	-4.69628e-12	-4.69628			5.69952	3.62692e-12	3.62692
				4.30128	4.1729e-12							-5.69648	-1.94254e-12	-1.94254			5.6972	4.12163e-12	4.12163
				4.3036	5.55572e-12							-5.69416	-2.4158e-12	-2.4158			5.69488	1.92938e-12	1.92938
				4.30592	4.53887e-12							-5.69184	-3.85704e-12	-3.85704			5.69256	3.3885e-12	3.3885
				4.30824	5.39241e-12							-5.68952	-4.56872e-12	-4.56872			5.69024	4.2921e-12	4.2921
				4.31056	6.32939e-12							-5.6872	-2.46587e-12	-2.46587			5.68792	4.71887e-12	4.71887
				4.31288	5.46036e-12							-5.68488	-2.85688e-12	-2.85688			5.6856	5.39598e-12	5.39598
				4.3152	3.9905e-12							-5.68256	-4.31719e-12	-4.31719			5.68328	5.68805e-12	5.68805
				4.31752	2.90928e-12							-5.68024	-9.37607e-13	-0.937607			5.68096	3.58162e-12	3.58162
				4.31984	4.82259e-12							-5.67792	-2.808e-12	-2.808			5.67864	3.41353e-12	3.41353
				4.32216	5.78103e-12							-5.6756	-4.63548e-12	-4.63548			5.67632	6.21018e-12	6.21018
				4.32448	5.25412e-12							-5.67328	-3.73307e-12	-3.73307			5.674	6.00872e-12	6.00872
				4.3268	5.55572e-12							-5.67096	-2.73528e-12	-2.73528			5.67168	3.37062e-12	3.37062
				4.32912	6.66795e-12							-5.66864	-1.27974e-12	-1.27974			5.66936	4.8357e-12	4.8357
				4.33144	5.83586e-12							-5.66632	-1.71962e-12	-1.71962			5.66704	4.04176e-12	4.04176
				4.33376	4.52337e-12							-5.664	-1.41683e-12	-1.41683			5.66472	4.96087e-12	4.96087
				4.33608	6.13866e-12							-5.66168	-1.37511e-12	-1.37511			5.6624	5.33995e-12	5.33995
				4.3384	7.23896e-12							-5.65936	-5.42584e-12	-5.42584			5.66008	5.61294e-12	5.61294
				4.34072	5.76076e-12							-5.65704	-4.88224e-12	-4.88224			5.65776	4.90842e-12	4.90842
				4.34304	6.14462e-12							-5.65472	-4.43759e-12	-4.43759			5.65544	5.08485e-12	5.08485
				4.34536	5.98488e-12							-5.6524	-4.92277e-12	-4.92277			5.65312	5.30777e-12	5.30777
				4.34768	6.67271e-12							-5.65008	-4.09427e-12	-4.09427			5.6508	3.94044e-12	3.94044
				4.35	7.32598e-12							-5.64776	-2.40746e-12	-2.40746			5.64848	4.39582e-12	4.39582
				4.35232	7.49407e-12							-5.64544	-1.5718e-12	-1.5718			5.64616	3.90825e-12	3.90825
				4.35464	4.65212e-12							-5.64312	-2.07963e-12	-2.07963			5.64384	3.58639e-12	3.58639
				4.35696	5.58314e-12							-5.6408	-5.26014e-12	-5.26014			5.64152	5.51996e-12	5.51996
				4.35928	5.8752e-12							-5.63848	-5.18742e-12	-5.18742			5.6392	5.09796e-12	5.09796
				4.3616	5.50804e-12							-5.63616	-2.17977e-12	-2.17977			5.63688	4.60562e-12	4.60562
				4.36392	4.97041e-12							-5.63384	-1.54081e-12	-1.54081			5.63456	2.25243e-12	2.25243
				4.36624	7.10187e-12							-5.63152	-2.11063e-12	-2.11063			5.63224	3.55897e-12	3.55897
				4.36856	5.71189e-12							-5.6292	-4.45786e-12	-4.45786			5.62992	3.15127e-12	3.15127
				4.37088	7.88388e-12							-5.62688	-2.04268e-12	-2.04268			5.6276	9.11329e-13	0.911329
				4.3732	6.30197e-12							-5.62456	-4.09904e-12	-4.09904			5.62528	4.59013e-12	4.59013
				4.37552	6.6596e-12							-5.62224	-4.59137e-12	-4.59137			5.62296	6.25548e-12	6.25548
				4.37784	5.86447e-12							-5.61992	-4.42567e-12	-4.42567			5.62064	4.73318e-12	4.73318
				4.38016	4.60682e-12							-5.6176	-4.19679e-12	-4.19679			5.61832	3.94282e-12	3.94282
				4.38248	4.29568e-12							-5.61528	-1.95685e-12	-1.95685			5.616	5.23505e-12	5.23505
				4.3848	6.49986e-12							-5.61296	-2.81754e-12	-2.81754			5.61368	2.79126e-12	2.79126
				4.38712	6.01587e-12							-5.61064	-2.839e-12	-2.839			5.61136	5.68566e-12	5.68566
				4.38944	7.08756e-12							-5.60832	-1.77446e-12	-1.77446			5.60904	3.89275e-12	3.89275
				4.39176	7.3224e-12							-5.606	-4.22302e-12	-4.22302			5.60672	3.75089e-12	3.75089
				4.39408	6.30913e-12							-5.60368	-2.82827e-12	-2.82827			5.6044	4.37794e-12	4.37794
				4.3964	6.21376e-12							-5.60136	-2.88787e-12	-2.88787			5.60208	5.48062e-12	5.48062
				4.39872	7.16266e-12							-5.59904	-2.51832e-12	-2.51832			5.59976	4.70099e-12	4.70099
				4.40104	6.78e-12							-5.59672	-1.04609e-12	-1.04609			5.59744	2.53019e-12	2.53019
				4.40336	5.29823e-12							-5.5944	-9.88867e-13	-0.988867			5.59512	3.5995e-12	3.5995
				4.40568	4.62351e-12							-5.59208	-1.28093e-12	-1.28093			5.5928	5.38525e-12	5.38525
				4.408	7.84454e-12							-5.58976	-2.48256e-12	-2.48256			5.59048	6.36039e-12	6.36039
				4.41032	7.27353e-12							-5.58744	-9.98404e-13	-0.998404			5.58816	4.95133e-12	4.95133
				4.41264	5.63917e-12							-5.58512	-2.79012e-12	-2.79012			5.58584	6.12077e-12	6.12077
				4.41496	7.27949e-12							-5.5828	-3.9238e-12	-3.9238			5.58352	6.42237e-12	6.42237
				4.41728	6.88133e-12							-5.58048	-3.26338e-12	-3.26338			5.5812	5.71904e-12	5.71904
				4.4196	5.8299e-12							-5.57816	-2.01526e-12	-2.01526			5.57888	3.86891e-12	3.86891
				4.42192	6.19945e-12							-5.57584	-2.36812e-12	-2.36812			5.57656	3.65314e-12	3.65314
				4.42424	8.28085e-12							-5.57352	-2.17262e-12	-2.17262			5.57424	3.84626e-12	3.84626
				4.42656	7.67646e-12							-5.5712	-3.2002e-12	-3.2002			5.57192	3.9309e-12	3.9309
				4.42888	7.85289e-12							-5.56888	-3.08695e-12	-3.08695			5.5696	6.07428e-12	6.07428
				4.4312	6.49271e-12							-5.56656	-1.48239e-12	-1.48239			5.56728	4.5484e-12	4.5484
				4.43352	7.13525e-12							-5.56424	-1.41564e-12	-1.41564			5.56496	6.20661e-12	6.20661
				4.43584	7.17458e-12							-5.56192	-2.57554e-12	-2.57554			5.56264	4.42681e-12	4.42681
				4.43816	5.42221e-12							-5.5596	-4.54846e-12	-4.54846			5.56032	3.8105e-12	3.8105
				4.44048	6.12674e-12							-5.55728	-5.65233e-12	-5.65233			5.558	4.63185e-12	4.63185
				4.4428	5.88236e-12							-5.55496	-5.95989e-12	-5.95989			5.55568	4.90484e-12	4.90484
				4.44512	5.23386e-12							-5.55264	-3.48273e-12	-3.48273			5.55336	4.72126e-12	4.72126
				4.44744	6.0111e-12							-5.55032	-3.13702e-12	-3.13702			5.55104	5.11346e-12	5.11346
				4.44976	4.87742e-12							-5.548	-3.12033e-12	-3.12033			5.54872	4.74391e-12	4.74391
				4.45208	5.56049e-12							-5.54568	-2.66853e-12	-2.66853			5.5464	3.32889e-12	3.32889
				4.4544	5.10988e-12							-5.54336	-2.44203e-12	-2.44203			5.54408	4.55794e-12	4.55794
				4.45672	6.3282e-12							-5.54104	-4.77853e-12	-4.77853			5.54176	2.709e-12	2.709
				4.45904	5.15041e-12							-5.53872	-2.33355e-12	-2.33355			5.53944	2.4527e-12	2.4527
				4.46136	5.31373e-12							-5.5364	-2.7937e-12	-2.7937			5.53712	3.24306e-12	3.24306
				4.46368	5.12895e-12							-5.53408	-2.60534e-12	-2.60534			5.5348	5.05028e-12	5.05028
				4.466	3.71155e-12							-5.53176	-2.16904e-12	-2.16904			5.53248	4.10852e-12	4.10852
				4.46832	5.85613e-12							-5.52944	-2.76151e-12	-2.76151			5.53016	2.01998e-12	2.01998
				4.47064	5.56168e-12							-5.52712	-4.10261e-12	-4.10261			5.52784	4.37197e-12	4.37197
				4.47296	3.85937e-12							-5.5248	-3.53756e-12	-3.53756			5.52552	4.43039e-12	4.43039
				4.47528	5.97653e-12							-5.52248	-5.10874e-12	-5.10874			5.5232	4.16574e-12	4.16574
				4.4776	5.32684e-12							-5.52016	-5.89075e-12	-5.89075			5.52088	5.56526e-12	5.56526
				4.47992	6.58331e-12							-5.51784	-4.6176e-12	-4.6176			5.51856	4.29568e-12	4.29568
				4.48224	7.08041e-12							-5.51552	-4.5425e-12	-4.5425			5.51624	3.21445e-12	3.21445
				4.48456	6.08859e-12							-5.5132	-4.81429e-12	-4.81429			5.51392	3.06663e-12	3.06663
				4.48688	6.97193e-12							-5.51088	-4.14434e-12	-4.14434			5.5116	4.35529e-12	4.35529
				4.4892	7.53698e-12							-5.50856	-3.34206e-12	-3.34206			5.50928	3.80215e-12	3.80215
				4.49152	8.11515e-12							-5.50624	-3.53756e-12	-3.53756			5.50696	3.58519e-12	3.58519
				4.49384	6.57973e-12							-5.50392	-3.89519e-12	-3.89519			5.50464	4.92034e-12	4.92034
				4.49616	6.42118e-12							-5.5016	-3.3957e-12	-3.3957			5.50232	4.32429e-12	4.32429
				4.49848	5.71546e-12							-5.49928	-2.36454e-12	-2.36454			5.5	6.02064e-12	6.02064
				4.5008	8.04004e-12							-5.49696	-3.10483e-12	-3.10483			5.49768	3.54585e-12	3.54585
				4.50312	8.3035e-12							-5.49464	-2.47183e-12	-2.47183			5.49536	3.5244e-12	3.5244
				4.50544	5.32088e-12							-5.49232	-2.10586e-12	-2.10586			5.49304	3.77474e-12	3.77474
				4.50776	3.9607e-12							-5.49	-1.28451e-12	-1.28451			5.49072	4.26707e-12	4.26707
				4.51008	3.33128e-12							-5.48768	-1.49074e-12	-1.49074			5.4884	3.75089e-12	3.75089
				4.5124	7.63712e-12							-5.48536	-3.22046e-12	-3.22046			5.48608	3.30982e-12	3.30982
				4.51472	6.79192e-12							-5.48304	-3.41358e-12	-3.41358			5.48376	2.45986e-12	2.45986
				4.51704	6.48198e-12							-5.48072	-2.54693e-12	-2.54693			5.48144	3.83076e-12	3.83076
				4.51936	6.65483e-12							-5.4784	-2.29779e-12	-2.29779			5.47912	4.9859e-12	4.9859
				4.52168	5.83467e-12							-5.47608	-2.43845e-12	-2.43845			5.4768	5.06577e-12	5.06577
				4.524	7.14478e-12							-5.47376	-1.63737e-12	-1.63737			5.47448	3.82838e-12	3.82838
				4.52632	7.40466e-12							-5.47144	-1.01867e-12	-1.01867			5.47216	4.50191e-12	4.50191
				4.52864	7.19843e-12							-5.46912	-1.53723e-12	-1.53723			5.46984	4.74152e-12	4.74152
				4.53096	7.09948e-12							-5.4668	-2.84138e-12	-2.84138			5.46752	5.53665e-12	5.53665
				4.53328	7.16266e-12							-5.46448	-3.97268e-12	-3.97268			5.4652	5.55572e-12	5.55572
				4.5356	5.29346e-12							-5.46216	-2.94152e-12	-2.94152			5.46288	2.78411e-12	2.78411
				4.53792	4.99902e-12							-5.45984	-3.16324e-12	-3.16324			5.46056	4.02627e-12	4.02627
				4.54024	5.51281e-12							-5.45752	-3.30034e-12	-3.30034			5.45824	5.51519e-12	5.51519
				4.54256	5.46989e-12							-5.4552	-9.13765e-13	-0.913765			5.45592	6.69536e-12	6.69536
				4.54488	3.42545e-12							-5.45288	-2.23937e-12	-2.23937			5.4536	3.57566e-12	3.57566
				4.5472	4.90007e-12							-5.45056	-3.48153e-12	-3.48153			5.45128	4.48046e-12	4.48046
				4.54952	6.95643e-12							-5.44824	-4.32554e-12	-4.32554			5.44896	4.66881e-12	4.66881
				4.55184	5.03955e-12							-5.44592	-3.90711e-12	-3.90711			5.44664	5.23028e-12	5.23028
				4.55416	5.03955e-12							-5.4436	-2.72217e-12	-2.72217			5.44432	4.51622e-12	4.51622
				4.55648	4.90007e-12							-5.44128	-2.60498e-13	-0.260498			5.442	5.10511e-12	5.10511
				4.5588	7.04822e-12							-5.43896	-2.16904e-12	-2.16904			5.43968	5.4532e-12	5.4532
				4.56112	5.94196e-12							-5.43664	-4.93469e-12	-4.93469			5.43736	3.40996e-12	3.40996
				4.56344	7.51672e-12							-5.43432	-2.85807e-12	-2.85807			5.43504	4.87504e-12	4.87504
				4.56576	6.9767e-12							-5.432	-2.87357e-12	-2.87357			5.43272	3.90944e-12	3.90944
				4.56808	4.62351e-12							-5.42968	-2.0689e-12	-2.0689			5.4304	2.49085e-12	2.49085
				4.5704	4.18601e-12							-5.42736	-1.46809e-12	-1.46809			5.42808	1.19147e-12	1.19147
				4.57272	5.58314e-12							-5.42504	-9.36053e-14	-0.0936053			5.42576	-5.16798e-13	-0.516798
				4.57504	5.71427e-12							-5.42272	-9.61449e-13	-0.961449			5.42344	3.2824e-12	3.2824
				4.57736	7.13525e-12							-5.4204	-1.46928e-12	-1.46928			5.42112	3.3134e-12	3.3134
				4.57968	7.94587e-12							-5.41808	-2.38004e-12	-2.38004			5.4188	3.04279e-12	3.04279
				4.582	4.35529e-12							-5.41576	-1.98069e-12	-1.98069			5.41648	3.47552e-12	3.47552
				4.58432	5.69877e-12							-5.41344	-2.27633e-12	-2.27633			5.41416	3.65672e-12	3.65672
				4.58664	5.42102e-12							-5.41112	-2.21195e-12	-2.21195			5.41184	4.1729e-12	4.1729
				4.58896	5.72858e-12							-5.4088	-2.37885e-12	-2.37885			5.40952	2.90451e-12	2.90451
				4.59128	4.81305e-12							-5.40648	-2.48137e-12	-2.48137			5.4072	4.24323e-12	4.24323
				4.5936	5.29108e-12							-5.40416	-2.4313e-12	-2.4313			5.40488	4.6855e-12	4.6855
				4.59592	5.04074e-12							-5.40184	-2.14162e-12	-2.14162			5.40256	5.06696e-12	5.06696
				4.59824	4.45542e-12							-5.39952	-3.65796e-12	-3.65796			5.40024	3.07379e-12	3.07379
				4.60056	6.05402e-12							-5.3972	-3.09887e-12	-3.09887			5.39792	2.3776e-12	2.3776
				4.60288	6.47959e-12							-5.39488	-1.76134e-12	-1.76134			5.3956	5.0467e-12	5.0467
				4.6052	9.30128e-12							-5.39256	-3.05596e-12	-3.05596			5.39328	2.95219e-12	2.95219
				4.60752	9.42526e-12							-5.39024	-1.74585e-12	-1.74585			5.39096	4.66881e-12	4.66881
				4.60984	8.59079e-12							-5.38792	-2.5362e-12	-2.5362			5.38864	6.21257e-12	6.21257
				4.61216	7.54652e-12							-5.3856	-3.78552e-12	-3.78552			5.38632	5.33757e-12	5.33757
				4.61448	6.99219e-12							-5.38328	-4.86317e-12	-4.86317			5.384	3.65195e-12	3.65195
				4.6168	9.36804e-12							-5.38096	-5.29113e-12	-5.29113			5.38168	5.02524e-12	5.02524
				4.61912	6.21018e-12							-5.37864	-3.76883e-12	-3.76883			5.37936	1.37386e-12	1.37386
				4.62144	6.90875e-12							-5.37632	-1.52889e-12	-1.52889			5.37704	2.84014e-12	2.84014
				4.62376	6.70013e-12							-5.374	-1.69697e-12	-1.69697			5.37472	5.12895e-12	5.12895
				4.62608	6.78477e-12							-5.37168	-3.01662e-12	-3.01662			5.3724	3.79977e-12	3.79977
				4.6284	7.80163e-12							-5.36936	-6.87268e-13	-0.687268			5.37008	4.18124e-12	4.18124
				4.63072	6.50344e-12							-5.36704	-1.50504e-12	-1.50504			5.36776	4.13952e-12	4.13952
				4.63304	4.8202e-12							-5.36472	-2.07248e-12	-2.07248			5.36544	4.03819e-12	4.03819
				4.63536	5.56407e-12							-5.3624	-1.87459e-12	-1.87459			5.36312	3.1918e-12	3.1918
[truncated: 84,207 more rows]
