# Supplementary material for: Long-distance electron transport in multicellular freshwater cable bacteria
Source: eLife. 2024 Aug 29;12:RP91097. doi: 10.7554/eLife.91097 (PMC11361709; doi:10.7554/eLife.91097)
Supplement: Figure 8—source data 1. [file elife-91097-fig8-data1.xlsx]

## Sheet: 4-Point R Measurement Test ((7)
SetupTitle	4-Point R Measurement Test
PrimitiveTest	I/V Sweep
TestParameter	Context.MainFrame	4156C
TestParameter	Channel.UnitType	SMU	SMU	SMU	SMU
TestParameter	Channel.Unit	SMU1:HR	SMU4:HR	SMU2:HR	SMU3:HR
TestParameter	Channel.IName	I2	I3	I1	I4
TestParameter	Channel.VName	V2	V3	V1	V4
TestParameter	Channel.Mode	I	I	I	V
TestParameter	Channel.Func	CONST	CONST	VAR1	CONST
TestParameter	Channel.Index
TestParameter	Channel.Time
TestParameter	Measurement.Port.Unit	SMU1:HR	SMU4:HR	SMU2:HR	SMU3:HR
TestParameter	Measurement.Port.SeriesResistor	NONE	NONE	NONE	NONE
TestParameter	Measurement.Port.Filter	ON	ON	ON	ON
TestParameter	Measurement.Primary.Locus	Double
TestParameter	Measurement.Primary.Scale	LINEAR
TestParameter	Measurement.Primary.Start	-1e-09
TestParameter	Measurement.Primary.Stop	1e-09
TestParameter	Measurement.Primary.Step	1e-10
TestParameter	Measurement.Primary.Compliance	5
TestParameter	Measurement.Primary.PowerCompliance	0
TestParameter	Measurement.Aborting.Condition	STOP AT ANY ABNORMAL
TestParameter	Measurement.PostOutput.Value	START
TestParameter	Measurement.PostOutput.Retention	OFF
TestParameter	Measurement.Bias.Source	0	0	-1e-09	0
TestParameter	Measurement.Bias.Compliance	10	10	5	0.001
TestParameter	Measurement.Monitor.Unit	SMU1:HR	SMU4:HR	SMU2:HR	SMU3:HR
TestParameter	Measurement.Monitor.Adc	HR ADC	HR ADC	HR ADC	HR ADC
TestParameter	Measurement.Monitor.RangingMode	AUTO	AUTO	AUTO	AUTO
TestParameter	Measurement.Monitor.RangeBoundary
TestParameter	Measurement.Timing.Hold	2
TestParameter	Measurement.Timing.Delay	2
TestParameter	Measurement.Adc.HighResolution.AutoZero	ON
TestParameter	Measurement.Adc.HighResolution.Mode	PLC
TestParameter	Measurement.Adc.HighResolution.Coeff	1
TestParameter	Measurement.Ag16440ASelector.SemiconductorRelay.Channel1	DEFAULT
TestParameter	Measurement.Ag16440ASelector.SemiconductorRelay.Channel3	DEFAULT
TestParameter	Function.User.Name	drop	R
TestParameter	Function.User.Unit	V	ohm
TestParameter	Function.User.Definition	V2-V3	drop/I1
TestParameter	Output.Graph.Enabled	true
TestParameter	Output.Graph.XAxis.Data	drop
TestParameter	Output.Graph.XAxis.Scale	Linear
TestParameter	Output.Graph.XAxis.Left	0
TestParameter	Output.Graph.XAxis.Right	1
TestParameter	Output.Graph.YAxis.Data	I1
TestParameter	Output.Graph.YAxis.Scale	Linear
TestParameter	Output.Graph.YAxis.Bottom	-1e-10
TestParameter	Output.Graph.YAxis.Top	1e-10
TestParameter	Output.Graph.YAxis.Group
TestParameter	Output.List.Data	I1	I2	I3	I4	V1	V2	V3	V4	drop
TestParameter	AutoAnalysis.Interpolation	false
TestParameter	AutoAnalysis.Line1.Enabled	false
TestParameter	AutoAnalysis.Line1.Type	1
TestParameter	AutoAnalysis.Line1.Fix	True
TestParameter	AutoAnalysis.Line1.YAxis	0
TestParameter	AutoAnalysis.Line1.Point1.Type	0
TestParameter	AutoAnalysis.Line1.Point1.XY.X
TestParameter	AutoAnalysis.Line1.Point1.XY.Y
TestParameter	AutoAnalysis.Line1.Point1.Data.Var
TestParameter	AutoAnalysis.Line1.Point1.Data.Condition
TestParameter	AutoAnalysis.Line1.Point1.Data.Start	false
TestParameter	AutoAnalysis.Line1.Point1.Data.StartVar
TestParameter	AutoAnalysis.Line1.Point1.Data.StartCondition
TestParameter	AutoAnalysis.Line1.Point2.Type	0
TestParameter	AutoAnalysis.Line1.Point2.XY.X
TestParameter	AutoAnalysis.Line1.Point2.XY.Y
TestParameter	AutoAnalysis.Line1.Point2.Data.Var
TestParameter	AutoAnalysis.Line1.Point2.Data.Condition
TestParameter	AutoAnalysis.Line1.Point2.Data.Start	false
TestParameter	AutoAnalysis.Line1.Point2.Data.StartVar
TestParameter	AutoAnalysis.Line1.Point2.Data.StartCondition
TestParameter	AutoAnalysis.Line1.GradientExpr	0
TestParameter	AutoAnalysis.Line2.Enabled	false
TestParameter	AutoAnalysis.Line2.Type	1
TestParameter	AutoAnalysis.Line2.Fix	True
TestParameter	AutoAnalysis.Line2.YAxis	0
TestParameter	AutoAnalysis.Line2.Point1.Type	0
TestParameter	AutoAnalysis.Line2.Point1.XY.X
TestParameter	AutoAnalysis.Line2.Point1.XY.Y
TestParameter	AutoAnalysis.Line2.Point1.Data.Var
TestParameter	AutoAnalysis.Line2.Point1.Data.Condition
TestParameter	AutoAnalysis.Line2.Point1.Data.Start	false
TestParameter	AutoAnalysis.Line2.Point1.Data.StartVar
TestParameter	AutoAnalysis.Line2.Point1.Data.StartCondition
TestParameter	AutoAnalysis.Line2.Point2.Type	0
TestParameter	AutoAnalysis.Line2.Point2.XY.X
TestParameter	AutoAnalysis.Line2.Point2.XY.Y
TestParameter	AutoAnalysis.Line2.Point2.Data.Var
TestParameter	AutoAnalysis.Line2.Point2.Data.Condition
TestParameter	AutoAnalysis.Line2.Point2.Data.Start	false
TestParameter	AutoAnalysis.Line2.Point2.Data.StartVar
TestParameter	AutoAnalysis.Line2.Point2.Data.StartCondition
TestParameter	AutoAnalysis.Line2.GradientExpr	0
TestParameter	AutoAnalysis.Marker.Enabled	false
TestParameter	AutoAnalysis.Marker.Data.Var
TestParameter	AutoAnalysis.Marker.Data.Condition
TestParameter	AutoAnalysis.Marker.Data.Start	false
TestParameter	AutoAnalysis.Marker.Data.StartVar
TestParameter	AutoAnalysis.Marker.Data.StartCondition
MetaData	TestRecord.EntryPoint	true
MetaData	TestRecord.RecordTime	03/10/2021 17:34:01
MetaData	TestRecord.TestTarget
MetaData	TestRecord.IterationIndex	7
MetaData	TestRecord.Preservation	true
MetaData	TestRecord.Flag
MetaData	TestRecord.Remarks	Mungi Cables 200 um gap (1)
MetaData	TestRecord.LinkKey	b5fc7329-3bed-41cb-9558-780bbe068ac0
AnalysisSetup	Analysis.Setup.Vector.Graph.Enabled	true
AnalysisSetup	Analysis.Setup.Vector.Graph.ActiveYAxis	0
AnalysisSetup	Analysis.Setup.Vector.Graph.LeftYAxis	0
AnalysisSetup	Analysis.Setup.Vector.Graph.RightYAxis	-1
AnalysisSetup	Analysis.Setup.Vector.Graph.XAxis.Name	drop
AnalysisSetup	Analysis.Setup.Vector.Graph.XAxis.GroupName
AnalysisSetup	Analysis.Setup.Vector.Graph.XAxis.Unit	V
AnalysisSetup	Analysis.Setup.Vector.Graph.XAxis.Scale	Linear
AnalysisSetup	Analysis.Setup.Vector.Graph.XAxis.Left	-0.17
AnalysisSetup	Analysis.Setup.Vector.Graph.XAxis.Right	0.17
AnalysisSetup	Analysis.Setup.Vector.Graph.YAxis.Name	I1
AnalysisSetup	Analysis.Setup.Vector.Graph.YAxis.GroupName
AnalysisSetup	Analysis.Setup.Vector.Graph.YAxis.Unit	A
AnalysisSetup	Analysis.Setup.Vector.Graph.YAxis.Scale	Linear
AnalysisSetup	Analysis.Setup.Vector.Graph.YAxis.Bottom	-1e-09
AnalysisSetup	Analysis.Setup.Vector.Graph.YAxis.Top	1e-09
AnalysisSetup	Analysis.Setup.Vector.Graph.Operation.Marker.Enabled	false
AnalysisSetup	Analysis.Setup.Vector.Graph.Operation.Marker.Interpolation	false
AnalysisSetup	Analysis.Setup.Vector.Graph.Operation.Marker.Index	0
AnalysisSetup	Analysis.Setup.Vector.Graph.Operation.Marker.Step	0
AnalysisSetup	Analysis.Setup.Vector.Graph.Operation.Cursor.Enabled	false
AnalysisSetup	Analysis.Setup.Vector.Graph.Operation.Cursor.Active	true
AnalysisSetup	Analysis.Setup.Vector.Graph.Operation.Cursor.NormalX	1.97059
AnalysisSetup	Analysis.Setup.Vector.Graph.Operation.Cursor.NormalY	0.5
AnalysisSetup	Analysis.Setup.Vector.Graph.Operation.Line1.Enabled	false
AnalysisSetup	Analysis.Setup.Vector.Graph.Operation.Line1.Active	false
AnalysisSetup	Analysis.Setup.Vector.Graph.Operation.Line1.Fix	false
AnalysisSetup	Analysis.Setup.Vector.Graph.Operation.Line1.Type	1
AnalysisSetup	Analysis.Setup.Vector.Graph.Operation.Line1.YAxisIndex	0
AnalysisSetup	Analysis.Setup.Vector.Graph.Operation.Line1.LastIndex	-1
AnalysisSetup	Analysis.Setup.Vector.Graph.Operation.Line1.LastStep	-1
AnalysisSetup	Analysis.Setup.Vector.Graph.Operation.Line1.Cursor1.Enabled	false
AnalysisSetup	Analysis.Setup.Vector.Graph.Operation.Line1.Cursor1.Active	false
AnalysisSetup	Analysis.Setup.Vector.Graph.Operation.Line1.Cursor1.NormalX	1.97059
AnalysisSetup	Analysis.Setup.Vector.Graph.Operation.Line1.Cursor1.NormalY	0.5
AnalysisSetup	Analysis.Setup.Vector.Graph.Operation.Line1.Cursor2.Enabled	false
AnalysisSetup	Analysis.Setup.Vector.Graph.Operation.Line1.Cursor2.Active	false
AnalysisSetup	Analysis.Setup.Vector.Graph.Operation.Line1.Cursor2.NormalX	1.97059
AnalysisSetup	Analysis.Setup.Vector.Graph.Operation.Line1.Cursor2.NormalY	0.5
AnalysisSetup	Analysis.Setup.Vector.Graph.Operation.Line1.Gradient
AnalysisSetup	Analysis.Setup.Vector.Graph.Operation.Line2.Enabled	false
AnalysisSetup	Analysis.Setup.Vector.Graph.Operation.Line2.Active	false
AnalysisSetup	Analysis.Setup.Vector.Graph.Operation.Line2.Fix	false
AnalysisSetup	Analysis.Setup.Vector.Graph.Operation.Line2.Type	1
AnalysisSetup	Analysis.Setup.Vector.Graph.Operation.Line2.YAxisIndex	0
AnalysisSetup	Analysis.Setup.Vector.Graph.Operation.Line2.LastIndex	-1
AnalysisSetup	Analysis.Setup.Vector.Graph.Operation.Line2.LastStep	-1
AnalysisSetup	Analysis.Setup.Vector.Graph.Operation.Line2.Cursor1.Enabled	false
AnalysisSetup	Analysis.Setup.Vector.Graph.Operation.Line2.Cursor1.Active	false
AnalysisSetup	Analysis.Setup.Vector.Graph.Operation.Line2.Cursor1.NormalX	1.97059
AnalysisSetup	Analysis.Setup.Vector.Graph.Operation.Line2.Cursor1.NormalY	0.5
AnalysisSetup	Analysis.Setup.Vector.Graph.Operation.Line2.Cursor2.Enabled	false
AnalysisSetup	Analysis.Setup.Vector.Graph.Operation.Line2.Cursor2.Active	false
AnalysisSetup	Analysis.Setup.Vector.Graph.Operation.Line2.Cursor2.NormalX	1.97059
AnalysisSetup	Analysis.Setup.Vector.Graph.Operation.Line2.Cursor2.NormalY	0.5
AnalysisSetup	Analysis.Setup.Vector.Graph.Operation.Line2.Gradient
AnalysisSetup	Analysis.Setup.Vector.Graph.Preference.BackgroundColor	-1
AnalysisSetup	Analysis.Setup.Vector.Graph.Preference.TextColor	-16777216
AnalysisSetup	Analysis.Setup.Vector.Graph.Preference.GridColor	-3618616
AnalysisSetup	Analysis.Setup.Vector.Graph.Preference.LineColor	-65336
AnalysisSetup	Analysis.Setup.Vector.Graph.Preference.Plots.Y1.Visible	true
AnalysisSetup	Analysis.Setup.Vector.Graph.Preference.Plots.Y1.PlotColor	-16777036
AnalysisSetup	Analysis.Setup.Vector.Graph.Preference.Plots.Y1.Thickness	1
AnalysisSetup	Analysis.Setup.Vector.Graph.Preference.Plots.Y2.Visible	true
AnalysisSetup	Analysis.Setup.Vector.Graph.Preference.Plots.Y2.PlotColor	-39936
AnalysisSetup	Analysis.Setup.Vector.Graph.Preference.Plots.Y2.Thickness	1
AnalysisSetup	Analysis.Setup.Vector.Graph.Preference.Plots.Y3.Visible	true
AnalysisSetup	Analysis.Setup.Vector.Graph.Preference.Plots.Y3.PlotColor	-16731136
AnalysisSetup	Analysis.Setup.Vector.Graph.Preference.Plots.Y3.Thickness	1
AnalysisSetup	Analysis.Setup.Vector.Graph.Preference.Plots.Y4.Visible	true
AnalysisSetup	Analysis.Setup.Vector.Graph.Preference.Plots.Y4.PlotColor	-8892376
AnalysisSetup	Analysis.Setup.Vector.Graph.Preference.Plots.Y4.Thickness	1
AnalysisSetup	Analysis.Setup.Vector.Graph.Preference.Plots.Y5.Visible	true
AnalysisSetup	Analysis.Setup.Vector.Graph.Preference.Plots.Y5.PlotColor	-65536
AnalysisSetup	Analysis.Setup.Vector.Graph.Preference.Plots.Y5.Thickness	1
AnalysisSetup	Analysis.Setup.Vector.Graph.Preference.Plots.Y6.Visible	true
AnalysisSetup	Analysis.Setup.Vector.Graph.Preference.Plots.Y6.PlotColor	-14336
AnalysisSetup	Analysis.Setup.Vector.Graph.Preference.Plots.Y6.Thickness	1
AnalysisSetup	Analysis.Setup.Vector.Graph.Preference.Plots.Y7.Visible	true
AnalysisSetup	Analysis.Setup.Vector.Graph.Preference.Plots.Y7.PlotColor	-6946586
AnalysisSetup	Analysis.Setup.Vector.Graph.Preference.Plots.Y7.Thickness	1
AnalysisSetup	Analysis.Setup.Vector.Graph.Preference.Plots.Y8.Visible	true
AnalysisSetup	Analysis.Setup.Vector.Graph.Preference.Plots.Y8.PlotColor	-16733546
AnalysisSetup	Analysis.Setup.Vector.Graph.Preference.Plots.Y8.Thickness	1
AnalysisSetup	Analysis.Setup.Vector.Graph.Preference.Text.AxisTitle.FontName	Tahoma
AnalysisSetup	Analysis.Setup.Vector.Graph.Preference.Text.AxisTitle.RelativeSize	Medium
AnalysisSetup	Analysis.Setup.Vector.Graph.Preference.Text.AxisTitle.Size	7
AnalysisSetup	Analysis.Setup.Vector.Graph.Preference.Text.ScaleText.FontName	Tahoma
AnalysisSetup	Analysis.Setup.Vector.Graph.Preference.Text.ScaleText.RelativeSize	Medium
AnalysisSetup	Analysis.Setup.Vector.Graph.Preference.Text.ScaleText.Size	7
AnalysisSetup	Analysis.Setup.Vector.Graph.Preference.Text.Legend.FontName	Tahoma
AnalysisSetup	Analysis.Setup.Vector.Graph.Preference.Text.Legend.RelativeSize	Medium
AnalysisSetup	Analysis.Setup.Vector.Graph.Preference.Text.Legend.Size	7
AnalysisSetup	Analysis.Setup.Vector.Graph.Preference.Scale.LogTickedDecadeCount	6
AnalysisSetup	Analysis.Setup.Vector.Graph.Preference.GridVisible	true
AnalysisSetup	Analysis.Setup.Vector.List.Datum.Name	I1	I2	I3	I4	V1	V2	V3	V4	drop
AnalysisSetup	Analysis.Setup.Vector.List.Datum.Unit	A	A	A	A	V	V	V	V	V
AnalysisSetup	Analysis.Setup.Preference.GraphVisible	true
AnalysisSetup	Analysis.Setup.Preference.ListVisible	true
AnalysisSetup	Analysis.Setup.Preference.ScalarVisible	true
AnalysisSetup	Analysis.Setup.Title	4-Point R Measurement Test
Dimension1	42	42	42	42	42	42	42	42	42	42
Dimension2	1	1	1	1	1	1	1	1	1	1
DataName	I1	I2	I3	V4	V2	V3	V1	I4	drop	R	flipped drop
DataValue	-1e-09	0	0	0	-0.136864	-0.301276	-0.461942	9.821e-10	0.164412	-164412000	-0.164412
DataValue	-9e-10	0	0	0	-0.125902	-0.27502	-0.41927	8.9275e-10	0.149118	-1.65687e+08	-0.149118
DataValue	-8e-10	0	0	0	-0.112242	-0.245108	-0.373512	8.012e-10	0.132866	-1.66082e+08	-0.132866
DataValue	-7e-10	0	0	0	-0.098682	-0.215006	-0.327634	6.959e-10	0.116324	-1.66177e+08	-0.116324
DataValue	-6e-10	0	0	0	-0.085474	-0.18481	-0.281384	5.8666e-10	0.099336	-165560000	-0.099336
DataValue	-5e-10	0	0	0	-0.073216	-0.156966	-0.238214	5.0889e-10	0.08375	-1.675e+08	-0.08375
DataValue	-4e-10	0	0	0	-0.056792	-0.123442	-0.188922	3.9295e-10	0.06665	-166625000	-0.06665
DataValue	-3e-10	0	0	0	-0.043126	-0.093082	-0.14174	3.0839e-10	0.049956	-166520000	-0.049956
DataValue	-2e-10	0	0	0	-0.028712	-0.061658	-0.094424	2.0237e-10	0.032946	-164730000	-0.032946
DataValue	-1e-10	0	0	0	-0.01457	-0.031422	-0.047664	9.567e-11	0.016852	-1.6852e+08	-0.016852
DataValue	0	0	0	0	0.000606	0.000846	0.000702	-3.4e-12	-0.00024		0.00024
DataValue	1e-10	0	0	0	0.015288	0.03235	0.049098	-9.964e-11	-0.017062	-1.7062e+08	0.017062
DataValue	2e-10	0	0	0	0.029916	0.06403	0.096444	-1.9982e-10	-0.034114	-170570000	0.034114
DataValue	3e-10	0	0	0	0.044144	0.09439	0.14353	-3.0083e-10	-0.050246	-1.67487e+08	0.050246
DataValue	4e-10	0	0	0	0.05934	0.126664	0.192032	-4.0142e-10	-0.067324	-1.6831e+08	0.067324
DataValue	5e-10	0	0	0	0.07305	0.15705	0.238212	-4.9575e-10	-0.084	-168000000	0.084
DataValue	6e-10	0	0	0	0.087776	0.1881	0.286076	-5.8754e-10	-0.100324	-1.67207e+08	0.100324
DataValue	7e-10	0	0	0	0.102938	0.220762	0.33358	-7.0325e-10	-0.117824	-1.6832e+08	0.117824
DataValue	8e-10	0	0	0	0.117508	0.252528	0.38256	-8.0178e-10	-0.13502	-1.68775e+08	0.13502
DataValue	9e-10	0	0	0	0.130492	0.282078	0.42826	-9.0176e-10	-0.151586	-1.68429e+08	0.151586
DataValue	1e-09	0	0	0	0.145244	0.313434	0.474602	-1.00261e-09	-0.16819	-168190000	0.16819
DataValue	1e-09	0	0	0	0.146176	0.314782	0.477312	-1.00277e-09	-0.168606	-168606000	0.168606
DataValue	9e-10	0	0	0	0.128062	0.278336	0.42527	-8.9169e-10	-0.150274	-1.66971e+08	0.150274
DataValue	8e-10	0	0	0	0.117832	0.253952	0.38389	-7.9772e-10	-0.13612	-170150000	0.13612
DataValue	7e-10	0	0	0	0.102432	0.221888	0.335362	-7.0049e-10	-0.119456	-1.70651e+08	0.119456
DataValue	6e-10	0	0	0	0.087626	0.189648	0.287104	-5.9854e-10	-0.102022	-1.70037e+08	0.102022
DataValue	5e-10	0	0	0	0.074528	0.160294	0.24132	-4.9969e-10	-0.085766	-1.71532e+08	0.085766
DataValue	4e-10	0	0	0	0.059484	0.129216	0.194472	-4.0917e-10	-0.069732	-174330000	0.069732
DataValue	3e-10	0	0	0	0.045014	0.096726	0.145582	-3.0656e-10	-0.051712	-1.72373e+08	0.051712
DataValue	2e-10	0	0	0	0.029748	0.064518	0.09735	-1.9796e-10	-0.03477	-1.7385e+08	0.03477
DataValue	1e-10	0	0	0	0.0149	0.03236	0.048876	-1.0382e-10	-0.01746	-174600000	0.01746
DataValue	0	0	0	0	0.000278	0.000774	0.001038	-2.01e-12	-0.000496		0.000496											Resistance(Ohms)	Number of cables	Gap size (m)
DataValue	-1e-10	0	0	0	-0.014268	-0.030968	-0.047258	9.918e-11	0.0167	-167000000	-0.0167											1.69492e+08	10	0.0002
DataValue	-2e-10	0	0	0	-0.029414	-0.06343	-0.09584	1.9493e-10	0.034016	-170080000	-0.034016											Number of fibers per cable	Total number of fibers	single fiber diameter (m)
DataValue	-3e-10	0	0	0	-0.043974	-0.095114	-0.143534	3.0116e-10	0.05114	-1.70467e+08	-0.05114											35	350	5e-08
DataValue	-4e-10	0	0	0	-0.058822	-0.127114	-0.192328	4.006e-10	0.068292	-170730000	-0.068292											Single fiber cross-sectional area (m^2)	Single fiber resistivity (Ohm*m)	Single fiber conductivity (S/m)
DataValue	-5e-10	0	0	0	-0.073376	-0.15888	-0.239578	5.0496e-10	0.085504	-1.71008e+08	-0.085504											1.9635e-15	0.582393	1.71705
DataValue	-6e-10	0	0	0	-0.087622	-0.189204	-0.28779	5.9448e-10	0.101582	-1.69303e+08	-0.101582											Single fiber conductivity (S/cm)
DataValue	-7e-10	0	0	0	-0.101366	-0.220798	-0.3353	6.9673e-10	0.119432	-1.70617e+08	-0.119432											0.0171705
DataValue	-8e-10	0	0	0	-0.117656	-0.253584	-0.38347	7.9584e-10	0.135928	-169910000	-0.135928
DataValue	-9e-10	0	0	0	-0.131064	-0.284512	-0.431994	8.9718e-10	0.153448	-1.70498e+08	-0.153448
DataValue	-1e-09	0	0	0	-0.147636	-0.316522	-0.477794	9.8282e-10	0.168886	-1.68886e+08	-0.168886
