# Supplementary material for: Long-distance electron transport in multicellular freshwater cable bacteria
Source: eLife. 2024 Aug 29;12:RP91097. doi: 10.7554/eLife.91097 (PMC11361709; doi:10.7554/eLife.91097)
Supplement: Figure 8—source data 2. [file elife-91097-fig8-data2.xlsx]

## Sheet: 4-Point R Measurement Test ((19
SetupTitle	4-Point R Measurement Test
PrimitiveTest	I/V Sweep
TestParameter	Context.MainFrame	4156C
TestParameter	Channel.UnitType	SMU	SMU	SMU	SMU
TestParameter	Channel.Unit	SMU1:HR	SMU4:HR	SMU2:HR	SMU3:HR
TestParameter	Channel.IName	I2	I3	I1	I4
TestParameter	Channel.VName	V2	V3	V1	V4
TestParameter	Channel.Mode	I	I	I	V
TestParameter	Channel.Func	CONST	CONST	VAR1	CONST
TestParameter	Channel.Index
TestParameter	Channel.Time
TestParameter	Measurement.Port.Unit	SMU1:HR	SMU4:HR	SMU2:HR	SMU3:HR
TestParameter	Measurement.Port.SeriesResistor	NONE	NONE	NONE	NONE
TestParameter	Measurement.Port.Filter	ON	ON	ON	ON
TestParameter	Measurement.Primary.Locus	Double
TestParameter	Measurement.Primary.Scale	LINEAR
TestParameter	Measurement.Primary.Start	-1e-09
TestParameter	Measurement.Primary.Stop	1e-09
TestParameter	Measurement.Primary.Step	1e-10
TestParameter	Measurement.Primary.Compliance	5
TestParameter	Measurement.Primary.PowerCompliance	0
TestParameter	Measurement.Aborting.Condition	STOP AT ANY ABNORMAL
TestParameter	Measurement.PostOutput.Value	START
TestParameter	Measurement.PostOutput.Retention	OFF
TestParameter	Measurement.Bias.Source	0	0	-1e-09	0
TestParameter	Measurement.Bias.Compliance	10	10	5	0.001
TestParameter	Measurement.Monitor.Unit	SMU1:HR	SMU4:HR	SMU2:HR	SMU3:HR
TestParameter	Measurement.Monitor.Adc	HR ADC	HR ADC	HR ADC	HR ADC
TestParameter	Measurement.Monitor.RangingMode	AUTO	AUTO	AUTO	AUTO
TestParameter	Measurement.Monitor.RangeBoundary
TestParameter	Measurement.Timing.Hold	2
TestParameter	Measurement.Timing.Delay	2
TestParameter	Measurement.Adc.HighResolution.AutoZero	ON
TestParameter	Measurement.Adc.HighResolution.Mode	PLC
TestParameter	Measurement.Adc.HighResolution.Coeff	1
TestParameter	Measurement.Ag16440ASelector.SemiconductorRelay.Channel1	DEFAULT
TestParameter	Measurement.Ag16440ASelector.SemiconductorRelay.Channel3	DEFAULT
TestParameter	Function.User.Name	drop	R
TestParameter	Function.User.Unit	V	ohm
TestParameter	Function.User.Definition	V2-V3	drop/I1
TestParameter	Output.Graph.Enabled	true
TestParameter	Output.Graph.XAxis.Data	drop
TestParameter	Output.Graph.XAxis.Scale	Linear
TestParameter	Output.Graph.XAxis.Left	0
TestParameter	Output.Graph.XAxis.Right	1
TestParameter	Output.Graph.YAxis.Data	I1
TestParameter	Output.Graph.YAxis.Scale	Linear
TestParameter	Output.Graph.YAxis.Bottom	-1e-10
TestParameter	Output.Graph.YAxis.Top	1e-10
TestParameter	Output.Graph.YAxis.Group
TestParameter	Output.List.Data	I1	I2	I3	I4	V1	V2	V3	V4	drop
TestParameter	AutoAnalysis.Interpolation	false
TestParameter	AutoAnalysis.Line1.Enabled	false
TestParameter	AutoAnalysis.Line1.Type	1
TestParameter	AutoAnalysis.Line1.Fix	True
TestParameter	AutoAnalysis.Line1.YAxis	0
TestParameter	AutoAnalysis.Line1.Point1.Type	0
TestParameter	AutoAnalysis.Line1.Point1.XY.X
TestParameter	AutoAnalysis.Line1.Point1.XY.Y
TestParameter	AutoAnalysis.Line1.Point1.Data.Var
TestParameter	AutoAnalysis.Line1.Point1.Data.Condition
TestParameter	AutoAnalysis.Line1.Point1.Data.Start	false
TestParameter	AutoAnalysis.Line1.Point1.Data.StartVar
TestParameter	AutoAnalysis.Line1.Point1.Data.StartCondition
TestParameter	AutoAnalysis.Line1.Point2.Type	0
TestParameter	AutoAnalysis.Line1.Point2.XY.X
TestParameter	AutoAnalysis.Line1.Point2.XY.Y
TestParameter	AutoAnalysis.Line1.Point2.Data.Var
TestParameter	AutoAnalysis.Line1.Point2.Data.Condition
TestParameter	AutoAnalysis.Line1.Point2.Data.Start	false
TestParameter	AutoAnalysis.Line1.Point2.Data.StartVar
TestParameter	AutoAnalysis.Line1.Point2.Data.StartCondition
TestParameter	AutoAnalysis.Line1.GradientExpr	0
TestParameter	AutoAnalysis.Line2.Enabled	false
TestParameter	AutoAnalysis.Line2.Type	1
TestParameter	AutoAnalysis.Line2.Fix	True
TestParameter	AutoAnalysis.Line2.YAxis	0
TestParameter	AutoAnalysis.Line2.Point1.Type	0
TestParameter	AutoAnalysis.Line2.Point1.XY.X
TestParameter	AutoAnalysis.Line2.Point1.XY.Y
TestParameter	AutoAnalysis.Line2.Point1.Data.Var
TestParameter	AutoAnalysis.Line2.Point1.Data.Condition
TestParameter	AutoAnalysis.Line2.Point1.Data.Start	false
TestParameter	AutoAnalysis.Line2.Point1.Data.StartVar
TestParameter	AutoAnalysis.Line2.Point1.Data.StartCondition
TestParameter	AutoAnalysis.Line2.Point2.Type	0
TestParameter	AutoAnalysis.Line2.Point2.XY.X
TestParameter	AutoAnalysis.Line2.Point2.XY.Y
TestParameter	AutoAnalysis.Line2.Point2.Data.Var
TestParameter	AutoAnalysis.Line2.Point2.Data.Condition
TestParameter	AutoAnalysis.Line2.Point2.Data.Start	false
TestParameter	AutoAnalysis.Line2.Point2.Data.StartVar
TestParameter	AutoAnalysis.Line2.Point2.Data.StartCondition
TestParameter	AutoAnalysis.Line2.GradientExpr	0
TestParameter	AutoAnalysis.Marker.Enabled	false
TestParameter	AutoAnalysis.Marker.Data.Var
TestParameter	AutoAnalysis.Marker.Data.Condition
TestParameter	AutoAnalysis.Marker.Data.Start	false
TestParameter	AutoAnalysis.Marker.Data.StartVar
TestParameter	AutoAnalysis.Marker.Data.StartCondition
MetaData	TestRecord.EntryPoint	true
MetaData	TestRecord.RecordTime	03/10/2021 18:05:37
MetaData	TestRecord.TestTarget
MetaData	TestRecord.IterationIndex	19
MetaData	TestRecord.Preservation	true
MetaData	TestRecord.Flag
MetaData	TestRecord.Remarks	Mungi cables 200 um gap (2)
MetaData	TestRecord.LinkKey	5dbbe9be-7342-491d-aab1-0cb5a02fa775
AnalysisSetup	Analysis.Setup.Vector.Graph.Enabled	true
AnalysisSetup	Analysis.Setup.Vector.Graph.ActiveYAxis	0
AnalysisSetup	Analysis.Setup.Vector.Graph.LeftYAxis	0
AnalysisSetup	Analysis.Setup.Vector.Graph.RightYAxis	-1
AnalysisSetup	Analysis.Setup.Vector.Graph.XAxis.Name	drop
AnalysisSetup	Analysis.Setup.Vector.Graph.XAxis.GroupName
AnalysisSetup	Analysis.Setup.Vector.Graph.XAxis.Unit	V
AnalysisSetup	Analysis.Setup.Vector.Graph.XAxis.Scale	Linear
AnalysisSetup	Analysis.Setup.Vector.Graph.XAxis.Left	-0.27
AnalysisSetup	Analysis.Setup.Vector.Graph.XAxis.Right	0.27
AnalysisSetup	Analysis.Setup.Vector.Graph.YAxis.Name	I1
AnalysisSetup	Analysis.Setup.Vector.Graph.YAxis.GroupName
AnalysisSetup	Analysis.Setup.Vector.Graph.YAxis.Unit	A
AnalysisSetup	Analysis.Setup.Vector.Graph.YAxis.Scale	Linear
AnalysisSetup	Analysis.Setup.Vector.Graph.YAxis.Bottom	-1e-09
AnalysisSetup	Analysis.Setup.Vector.Graph.YAxis.Top	1e-09
AnalysisSetup	Analysis.Setup.Vector.Graph.Operation.Marker.Enabled	false
AnalysisSetup	Analysis.Setup.Vector.Graph.Operation.Marker.Interpolation	false
AnalysisSetup	Analysis.Setup.Vector.Graph.Operation.Marker.Index	0
AnalysisSetup	Analysis.Setup.Vector.Graph.Operation.Marker.Step	0
AnalysisSetup	Analysis.Setup.Vector.Graph.Operation.Cursor.Enabled	false
AnalysisSetup	Analysis.Setup.Vector.Graph.Operation.Cursor.Active	true
AnalysisSetup	Analysis.Setup.Vector.Graph.Operation.Cursor.NormalX	1.42593
AnalysisSetup	Analysis.Setup.Vector.Graph.Operation.Cursor.NormalY	0.5
AnalysisSetup	Analysis.Setup.Vector.Graph.Operation.Line1.Enabled	false
AnalysisSetup	Analysis.Setup.Vector.Graph.Operation.Line1.Active	false
AnalysisSetup	Analysis.Setup.Vector.Graph.Operation.Line1.Fix	false
AnalysisSetup	Analysis.Setup.Vector.Graph.Operation.Line1.Type	1
AnalysisSetup	Analysis.Setup.Vector.Graph.Operation.Line1.YAxisIndex	0
AnalysisSetup	Analysis.Setup.Vector.Graph.Operation.Line1.LastIndex	-1
AnalysisSetup	Analysis.Setup.Vector.Graph.Operation.Line1.LastStep	-1
AnalysisSetup	Analysis.Setup.Vector.Graph.Operation.Line1.Cursor1.Enabled	false
AnalysisSetup	Analysis.Setup.Vector.Graph.Operation.Line1.Cursor1.Active	false
AnalysisSetup	Analysis.Setup.Vector.Graph.Operation.Line1.Cursor1.NormalX	1.42593
AnalysisSetup	Analysis.Setup.Vector.Graph.Operation.Line1.Cursor1.NormalY	0.5
AnalysisSetup	Analysis.Setup.Vector.Graph.Operation.Line1.Cursor2.Enabled	false
AnalysisSetup	Analysis.Setup.Vector.Graph.Operation.Line1.Cursor2.Active	false
AnalysisSetup	Analysis.Setup.Vector.Graph.Operation.Line1.Cursor2.NormalX	1.42593
AnalysisSetup	Analysis.Setup.Vector.Graph.Operation.Line1.Cursor2.NormalY	0.5
AnalysisSetup	Analysis.Setup.Vector.Graph.Operation.Line1.Gradient
AnalysisSetup	Analysis.Setup.Vector.Graph.Operation.Line2.Enabled	false
AnalysisSetup	Analysis.Setup.Vector.Graph.Operation.Line2.Active	false
AnalysisSetup	Analysis.Setup.Vector.Graph.Operation.Line2.Fix	false
AnalysisSetup	Analysis.Setup.Vector.Graph.Operation.Line2.Type	1
AnalysisSetup	Analysis.Setup.Vector.Graph.Operation.Line2.YAxisIndex	0
AnalysisSetup	Analysis.Setup.Vector.Graph.Operation.Line2.LastIndex	-1
AnalysisSetup	Analysis.Setup.Vector.Graph.Operation.Line2.LastStep	-1
AnalysisSetup	Analysis.Setup.Vector.Graph.Operation.Line2.Cursor1.Enabled	false
AnalysisSetup	Analysis.Setup.Vector.Graph.Operation.Line2.Cursor1.Active	false
AnalysisSetup	Analysis.Setup.Vector.Graph.Operation.Line2.Cursor1.NormalX	1.42593
AnalysisSetup	Analysis.Setup.Vector.Graph.Operation.Line2.Cursor1.NormalY	0.5
AnalysisSetup	Analysis.Setup.Vector.Graph.Operation.Line2.Cursor2.Enabled	false
AnalysisSetup	Analysis.Setup.Vector.Graph.Operation.Line2.Cursor2.Active	false
AnalysisSetup	Analysis.Setup.Vector.Graph.Operation.Line2.Cursor2.NormalX	1.42593
AnalysisSetup	Analysis.Setup.Vector.Graph.Operation.Line2.Cursor2.NormalY	0.5
AnalysisSetup	Analysis.Setup.Vector.Graph.Operation.Line2.Gradient
AnalysisSetup	Analysis.Setup.Vector.Graph.Preference.BackgroundColor	-1
AnalysisSetup	Analysis.Setup.Vector.Graph.Preference.TextColor	-16777216
AnalysisSetup	Analysis.Setup.Vector.Graph.Preference.GridColor	-3618616
AnalysisSetup	Analysis.Setup.Vector.Graph.Preference.LineColor	-65336
AnalysisSetup	Analysis.Setup.Vector.Graph.Preference.Plots.Y1.Visible	true
AnalysisSetup	Analysis.Setup.Vector.Graph.Preference.Plots.Y1.PlotColor	-16777036
AnalysisSetup	Analysis.Setup.Vector.Graph.Preference.Plots.Y1.Thickness	1
AnalysisSetup	Analysis.Setup.Vector.Graph.Preference.Plots.Y2.Visible	true
AnalysisSetup	Analysis.Setup.Vector.Graph.Preference.Plots.Y2.PlotColor	-39936
AnalysisSetup	Analysis.Setup.Vector.Graph.Preference.Plots.Y2.Thickness	1
AnalysisSetup	Analysis.Setup.Vector.Graph.Preference.Plots.Y3.Visible	true
AnalysisSetup	Analysis.Setup.Vector.Graph.Preference.Plots.Y3.PlotColor	-16731136
AnalysisSetup	Analysis.Setup.Vector.Graph.Preference.Plots.Y3.Thickness	1
AnalysisSetup	Analysis.Setup.Vector.Graph.Preference.Plots.Y4.Visible	true
AnalysisSetup	Analysis.Setup.Vector.Graph.Preference.Plots.Y4.PlotColor	-8892376
AnalysisSetup	Analysis.Setup.Vector.Graph.Preference.Plots.Y4.Thickness	1
AnalysisSetup	Analysis.Setup.Vector.Graph.Preference.Plots.Y5.Visible	true
AnalysisSetup	Analysis.Setup.Vector.Graph.Preference.Plots.Y5.PlotColor	-65536
AnalysisSetup	Analysis.Setup.Vector.Graph.Preference.Plots.Y5.Thickness	1
AnalysisSetup	Analysis.Setup.Vector.Graph.Preference.Plots.Y6.Visible	true
AnalysisSetup	Analysis.Setup.Vector.Graph.Preference.Plots.Y6.PlotColor	-14336
AnalysisSetup	Analysis.Setup.Vector.Graph.Preference.Plots.Y6.Thickness	1
AnalysisSetup	Analysis.Setup.Vector.Graph.Preference.Plots.Y7.Visible	true
AnalysisSetup	Analysis.Setup.Vector.Graph.Preference.Plots.Y7.PlotColor	-6946586
AnalysisSetup	Analysis.Setup.Vector.Graph.Preference.Plots.Y7.Thickness	1
AnalysisSetup	Analysis.Setup.Vector.Graph.Preference.Plots.Y8.Visible	true
AnalysisSetup	Analysis.Setup.Vector.Graph.Preference.Plots.Y8.PlotColor	-16733546
AnalysisSetup	Analysis.Setup.Vector.Graph.Preference.Plots.Y8.Thickness	1
AnalysisSetup	Analysis.Setup.Vector.Graph.Preference.Text.AxisTitle.FontName	Tahoma
AnalysisSetup	Analysis.Setup.Vector.Graph.Preference.Text.AxisTitle.RelativeSize	Medium
AnalysisSetup	Analysis.Setup.Vector.Graph.Preference.Text.AxisTitle.Size	7
AnalysisSetup	Analysis.Setup.Vector.Graph.Preference.Text.ScaleText.FontName	Tahoma
AnalysisSetup	Analysis.Setup.Vector.Graph.Preference.Text.ScaleText.RelativeSize	Medium
AnalysisSetup	Analysis.Setup.Vector.Graph.Preference.Text.ScaleText.Size	7
AnalysisSetup	Analysis.Setup.Vector.Graph.Preference.Text.Legend.FontName	Tahoma
AnalysisSetup	Analysis.Setup.Vector.Graph.Preference.Text.Legend.RelativeSize	Medium
AnalysisSetup	Analysis.Setup.Vector.Graph.Preference.Text.Legend.Size	7
AnalysisSetup	Analysis.Setup.Vector.Graph.Preference.Scale.LogTickedDecadeCount	6
AnalysisSetup	Analysis.Setup.Vector.Graph.Preference.GridVisible	true
AnalysisSetup	Analysis.Setup.Vector.List.Datum.Name	I1	I2	I3	I4	V1	V2	V3	V4	drop
AnalysisSetup	Analysis.Setup.Vector.List.Datum.Unit	A	A	A	A	V	V	V	V	V
AnalysisSetup	Analysis.Setup.Preference.GraphVisible	true
AnalysisSetup	Analysis.Setup.Preference.ListVisible	true
AnalysisSetup	Analysis.Setup.Preference.ScalarVisible	true
AnalysisSetup	Analysis.Setup.Title	4-Point R Measurement Test
Dimension1	42	42	42	42	42	42	42	42	42	42
Dimension2	1	1	1	1	1	1	1	1	1	1
DataName	I1	I2	I3	V4	V2	V3	V1	I4	drop	R	flipped drop
DataValue	-1e-09	0	0	0	-0.2255	-0.483086	-0.719208	9.806e-10	0.257586	-2.57586e+08	-0.257586
DataValue	-9e-10	0	0	0	-0.211982	-0.444382	-0.657962	8.9402e-10	0.2324	-2.58222e+08	-0.2324
DataValue	-8e-10	0	0	0	-0.190028	-0.398332	-0.58866	8.0731e-10	0.208304	-2.6038e+08	-0.208304
DataValue	-7e-10	0	0	0	-0.16784	-0.350954	-0.516714	6.8594e-10	0.183114	-2.61591e+08	-0.183114
DataValue	-6e-10	0	0	0	-0.145502	-0.302456	-0.447086	5.9726e-10	0.156954	-261590000	-0.156954
DataValue	-5e-10	0	0	0	-0.120798	-0.253674	-0.374422	4.9069e-10	0.132876	-265752000	-0.132876
DataValue	-4e-10	0	0	0	-0.099348	-0.20612	-0.303908	3.9204e-10	0.106772	-266930000	-0.106772
DataValue	-3e-10	0	0	0	-0.074118	-0.154374	-0.22741	2.9699e-10	0.080256	-2.6752e+08	-0.080256
DataValue	-2e-10	0	0	0	-0.049676	-0.103072	-0.152246	1.9534e-10	0.053396	-266980000	-0.053396
DataValue	-1e-10	0	0	0	-0.024156	-0.052488	-0.077814	1.0266e-10	0.028332	-283320000	-0.028332
DataValue	0	0	0	0	9.4e-05	-0.000296	-0.001672	4.54e-12	0.00039		-0.00039
DataValue	1e-10	0	0	0	0.024602	0.050124	0.073608	-1.0413e-10	-0.025522	-2.5522e+08	0.025522
DataValue	2e-10	0	0	0	0.049368	0.101356	0.148616	-1.9744e-10	-0.051988	-259940000	0.051988
DataValue	3e-10	0	0	0	0.075348	0.1537	0.226278	-3.0117e-10	-0.078352	-2.61173e+08	0.078352
DataValue	4e-10	0	0	0	0.097234	0.201568	0.296392	-4.0277e-10	-0.104334	-2.60835e+08	0.104334
DataValue	5e-10	0	0	0	0.12281	0.25539	0.374054	-5.0348e-10	-0.13258	-265160000	0.13258
DataValue	6e-10	0	0	0	0.150006	0.30908	0.45173	-5.9935e-10	-0.159074	-2.65123e+08	0.159074
DataValue	7e-10	0	0	0	0.175874	0.363048	0.529018	-7.0084e-10	-0.187174	-2.67391e+08	0.187174
DataValue	8e-10	0	0	0	0.197558	0.40888	0.598936	-7.923e-10	-0.211322	-2.64152e+08	0.211322
DataValue	9e-10	0	0	0	0.219992	0.458604	0.671544	-8.9876e-10	-0.238612	-2.65124e+08	0.238612
DataValue	1e-09	0	0	0	0.248108	0.51513	0.754718	-1.04919e-09	-0.267022	-2.67022e+08	0.267022
DataValue	1e-09	0	0	0	0.248386	0.513642	0.751034	-1.00153e-09	-0.265256	-2.65256e+08	0.265256
DataValue	9e-10	0	0	0	0.226214	0.467052	0.683462	-8.8734e-10	-0.240838	-2.67598e+08	0.240838
DataValue	8e-10	0	0	0	0.202774	0.424044	0.61771	-7.9286e-10	-0.22127	-276587500	0.22127
DataValue	7e-10	0	0	0	0.182938	0.380268	0.549988	-7.2777e-10	-0.19733	-281900000	0.19733
DataValue	6e-10	0	0	0	0.151356	0.315124	0.461636	-5.9776e-10	-0.163768	-2.72947e+08	0.163768
DataValue	5e-10	0	0	0	0.12725	0.264248	0.386744	-5.0799e-10	-0.136998	-2.73996e+08	0.136998
DataValue	4e-10	0	0	0	0.105534	0.215432	0.31298	-4.0827e-10	-0.109898	-274745000	0.109898
DataValue	3e-10	0	0	0	0.076432	0.159774	0.233208	-3.2456e-10	-0.083342	-2.77807e+08	0.083342
DataValue	2e-10	0	0	0	0.05175	0.108256	0.157862	-1.9643e-10	-0.056506	-2.8253e+08	0.056506
DataValue	1e-10	0	0	0	0.02731	0.056294	0.08149	-1.013e-10	-0.028984	-289840000	0.028984
DataValue	0	0	0	0	0.001112	0.003596	0.00482	-7.48e-12	-0.002484		0.002484											Resistance(Ohms)	Number of cables	Gap size (m)
DataValue	-1e-10	0	0	0	-0.02413	-0.049264	-0.072364	1.202e-10	0.025134	-2.5134e+08	-0.025134											2.63158e+08	10	0.0002
DataValue	-2e-10	0	0	0	-0.0501	-0.10228	-0.15004	2.0117e-10	0.05218	-2.609e+08	-0.05218											Number of fibers per cable	Total number of fibers	single fiber diameter (m)
DataValue	-3e-10	0	0	0	-0.074454	-0.153036	-0.224246	2.9842e-10	0.078582	-261940000	-0.078582											35	350	5e-08
DataValue	-4e-10	0	0	0	-0.099134	-0.205634	-0.30056	3.941e-10	0.1065	-2.6625e+08	-0.1065											Single fiber cross-sectional area (m^2)	Single fiber resistivity (Ohm*m)	Single fiber conductivity (S/m)
DataValue	-5e-10	0	0	0	-0.123756	-0.256116	-0.375198	4.98e-10	0.13236	-264720000	-0.13236											1.9635e-15	0.904241	1.1059
DataValue	-6e-10	0	0	0	-0.145798	-0.304942	-0.448162	5.8977e-10	0.159144	-265240000	-0.159144											Single fiber conductivity (S/cm)
DataValue	-7e-10	0	0	0	-0.169768	-0.35481	-0.523464	7.0019e-10	0.185042	-2.64346e+08	-0.185042											0.011059
DataValue	-8e-10	0	0	0	-0.190308	-0.402172	-0.59443	7.9677e-10	0.211864	-2.6483e+08	-0.211864
DataValue	-9e-10	0	0	0	-0.215958	-0.453916	-0.669494	8.9793e-10	0.237958	-2.64398e+08	-0.237958
DataValue	-1e-09	0	0	0	-0.242428	-0.50743	-0.746678	9.8807e-10	0.265002	-2.65002e+08	-0.265002
