# Supplementary material for: Long-distance electron transport in multicellular freshwater cable bacteria
Source: eLife. 2024 Aug 29;12:RP91097. doi: 10.7554/eLife.91097 (PMC11361709; doi:10.7554/eLife.91097)
Supplement: Figure 8—source data 3. [file elife-91097-fig8-data3.xlsx]

## Sheet: 4-Point R Measurement Test ((20
SetupTitle	4-Point R Measurement Test
PrimitiveTest	I/V Sweep
TestParameter	Context.MainFrame	4156C
TestParameter	Channel.UnitType	SMU	SMU	SMU	SMU
TestParameter	Channel.Unit	SMU1:HR	SMU4:HR	SMU2:HR	SMU3:HR
TestParameter	Channel.IName	I2	I3	I1	I4
TestParameter	Channel.VName	V2	V3	V1	V4
TestParameter	Channel.Mode	I	I	I	V
TestParameter	Channel.Func	CONST	CONST	VAR1	CONST
TestParameter	Channel.Index
TestParameter	Channel.Time
TestParameter	Measurement.Port.Unit	SMU1:HR	SMU4:HR	SMU2:HR	SMU3:HR
TestParameter	Measurement.Port.SeriesResistor	NONE	NONE	NONE	NONE
TestParameter	Measurement.Port.Filter	ON	ON	ON	ON
TestParameter	Measurement.Primary.Locus	Double
TestParameter	Measurement.Primary.Scale	LINEAR
TestParameter	Measurement.Primary.Start	-1e-09
TestParameter	Measurement.Primary.Stop	1e-09
TestParameter	Measurement.Primary.Step	1e-10
TestParameter	Measurement.Primary.Compliance	5
TestParameter	Measurement.Primary.PowerCompliance	0
TestParameter	Measurement.Aborting.Condition	STOP AT ANY ABNORMAL
TestParameter	Measurement.PostOutput.Value	START
TestParameter	Measurement.PostOutput.Retention	OFF
TestParameter	Measurement.Bias.Source	0	0	-1e-09	0
TestParameter	Measurement.Bias.Compliance	10	10	5	0.001
TestParameter	Measurement.Monitor.Unit	SMU1:HR	SMU4:HR	SMU2:HR	SMU3:HR
TestParameter	Measurement.Monitor.Adc	HR ADC	HR ADC	HR ADC	HR ADC
TestParameter	Measurement.Monitor.RangingMode	AUTO	AUTO	AUTO	AUTO
TestParameter	Measurement.Monitor.RangeBoundary
TestParameter	Measurement.Timing.Hold	2
TestParameter	Measurement.Timing.Delay	2
TestParameter	Measurement.Adc.HighResolution.AutoZero	ON
TestParameter	Measurement.Adc.HighResolution.Mode	PLC
TestParameter	Measurement.Adc.HighResolution.Coeff	1
TestParameter	Measurement.Ag16440ASelector.SemiconductorRelay.Channel1	DEFAULT
TestParameter	Measurement.Ag16440ASelector.SemiconductorRelay.Channel3	DEFAULT
TestParameter	Function.User.Name	drop	R
TestParameter	Function.User.Unit	V	ohm
TestParameter	Function.User.Definition	V2-V3	drop/I1
TestParameter	Output.Graph.Enabled	true
TestParameter	Output.Graph.XAxis.Data	drop
TestParameter	Output.Graph.XAxis.Scale	Linear
TestParameter	Output.Graph.XAxis.Left	0
TestParameter	Output.Graph.XAxis.Right	1
TestParameter	Output.Graph.YAxis.Data	I1
TestParameter	Output.Graph.YAxis.Scale	Linear
TestParameter	Output.Graph.YAxis.Bottom	-1e-10
TestParameter	Output.Graph.YAxis.Top	1e-10
TestParameter	Output.Graph.YAxis.Group
TestParameter	Output.List.Data	I1	I2	I3	I4	V1	V2	V3	V4	drop
TestParameter	AutoAnalysis.Interpolation	false
TestParameter	AutoAnalysis.Line1.Enabled	false
TestParameter	AutoAnalysis.Line1.Type	1
TestParameter	AutoAnalysis.Line1.Fix	True
TestParameter	AutoAnalysis.Line1.YAxis	0
TestParameter	AutoAnalysis.Line1.Point1.Type	0
TestParameter	AutoAnalysis.Line1.Point1.XY.X
TestParameter	AutoAnalysis.Line1.Point1.XY.Y
TestParameter	AutoAnalysis.Line1.Point1.Data.Var
TestParameter	AutoAnalysis.Line1.Point1.Data.Condition
TestParameter	AutoAnalysis.Line1.Point1.Data.Start	false
TestParameter	AutoAnalysis.Line1.Point1.Data.StartVar
TestParameter	AutoAnalysis.Line1.Point1.Data.StartCondition
TestParameter	AutoAnalysis.Line1.Point2.Type	0
TestParameter	AutoAnalysis.Line1.Point2.XY.X
TestParameter	AutoAnalysis.Line1.Point2.XY.Y
TestParameter	AutoAnalysis.Line1.Point2.Data.Var
TestParameter	AutoAnalysis.Line1.Point2.Data.Condition
TestParameter	AutoAnalysis.Line1.Point2.Data.Start	false
TestParameter	AutoAnalysis.Line1.Point2.Data.StartVar
TestParameter	AutoAnalysis.Line1.Point2.Data.StartCondition
TestParameter	AutoAnalysis.Line1.GradientExpr	0
TestParameter	AutoAnalysis.Line2.Enabled	false
TestParameter	AutoAnalysis.Line2.Type	1
TestParameter	AutoAnalysis.Line2.Fix	True
TestParameter	AutoAnalysis.Line2.YAxis	0
TestParameter	AutoAnalysis.Line2.Point1.Type	0
TestParameter	AutoAnalysis.Line2.Point1.XY.X
TestParameter	AutoAnalysis.Line2.Point1.XY.Y
TestParameter	AutoAnalysis.Line2.Point1.Data.Var
TestParameter	AutoAnalysis.Line2.Point1.Data.Condition
TestParameter	AutoAnalysis.Line2.Point1.Data.Start	false
TestParameter	AutoAnalysis.Line2.Point1.Data.StartVar
TestParameter	AutoAnalysis.Line2.Point1.Data.StartCondition
TestParameter	AutoAnalysis.Line2.Point2.Type	0
TestParameter	AutoAnalysis.Line2.Point2.XY.X
TestParameter	AutoAnalysis.Line2.Point2.XY.Y
TestParameter	AutoAnalysis.Line2.Point2.Data.Var
TestParameter	AutoAnalysis.Line2.Point2.Data.Condition
TestParameter	AutoAnalysis.Line2.Point2.Data.Start	false
TestParameter	AutoAnalysis.Line2.Point2.Data.StartVar
TestParameter	AutoAnalysis.Line2.Point2.Data.StartCondition
TestParameter	AutoAnalysis.Line2.GradientExpr	0
TestParameter	AutoAnalysis.Marker.Enabled	false
TestParameter	AutoAnalysis.Marker.Data.Var
TestParameter	AutoAnalysis.Marker.Data.Condition
TestParameter	AutoAnalysis.Marker.Data.Start	false
TestParameter	AutoAnalysis.Marker.Data.StartVar
TestParameter	AutoAnalysis.Marker.Data.StartCondition
MetaData	TestRecord.EntryPoint	true
MetaData	TestRecord.RecordTime	03/10/2021 18:07:55
MetaData	TestRecord.TestTarget
MetaData	TestRecord.IterationIndex	20
MetaData	TestRecord.Preservation	true
MetaData	TestRecord.Flag
MetaData	TestRecord.Remarks	Mungi cables 200 um gap (3)
MetaData	TestRecord.LinkKey	849ddd5b-534e-43e7-8e6a-764eac41feb5
AnalysisSetup	Analysis.Setup.Vector.Graph.Enabled	true
AnalysisSetup	Analysis.Setup.Vector.Graph.ActiveYAxis	0
AnalysisSetup	Analysis.Setup.Vector.Graph.LeftYAxis	0
AnalysisSetup	Analysis.Setup.Vector.Graph.RightYAxis	-1
AnalysisSetup	Analysis.Setup.Vector.Graph.XAxis.Name	drop
AnalysisSetup	Analysis.Setup.Vector.Graph.XAxis.GroupName
AnalysisSetup	Analysis.Setup.Vector.Graph.XAxis.Unit	V
AnalysisSetup	Analysis.Setup.Vector.Graph.XAxis.Scale	Linear
AnalysisSetup	Analysis.Setup.Vector.Graph.XAxis.Left	-0.28
AnalysisSetup	Analysis.Setup.Vector.Graph.XAxis.Right	0.28
AnalysisSetup	Analysis.Setup.Vector.Graph.YAxis.Name	I1
AnalysisSetup	Analysis.Setup.Vector.Graph.YAxis.GroupName
AnalysisSetup	Analysis.Setup.Vector.Graph.YAxis.Unit	A
AnalysisSetup	Analysis.Setup.Vector.Graph.YAxis.Scale	Linear
AnalysisSetup	Analysis.Setup.Vector.Graph.YAxis.Bottom	-1e-09
AnalysisSetup	Analysis.Setup.Vector.Graph.YAxis.Top	1e-09
AnalysisSetup	Analysis.Setup.Vector.Graph.Operation.Marker.Enabled	false
AnalysisSetup	Analysis.Setup.Vector.Graph.Operation.Marker.Interpolation	false
AnalysisSetup	Analysis.Setup.Vector.Graph.Operation.Marker.Index	0
AnalysisSetup	Analysis.Setup.Vector.Graph.Operation.Marker.Step	0
AnalysisSetup	Analysis.Setup.Vector.Graph.Operation.Cursor.Enabled	false
AnalysisSetup	Analysis.Setup.Vector.Graph.Operation.Cursor.Active	true
AnalysisSetup	Analysis.Setup.Vector.Graph.Operation.Cursor.NormalX	1.39286
AnalysisSetup	Analysis.Setup.Vector.Graph.Operation.Cursor.NormalY	0.5
AnalysisSetup	Analysis.Setup.Vector.Graph.Operation.Line1.Enabled	false
AnalysisSetup	Analysis.Setup.Vector.Graph.Operation.Line1.Active	false
AnalysisSetup	Analysis.Setup.Vector.Graph.Operation.Line1.Fix	false
AnalysisSetup	Analysis.Setup.Vector.Graph.Operation.Line1.Type	1
AnalysisSetup	Analysis.Setup.Vector.Graph.Operation.Line1.YAxisIndex	0
AnalysisSetup	Analysis.Setup.Vector.Graph.Operation.Line1.LastIndex	-1
AnalysisSetup	Analysis.Setup.Vector.Graph.Operation.Line1.LastStep	-1
AnalysisSetup	Analysis.Setup.Vector.Graph.Operation.Line1.Cursor1.Enabled	false
AnalysisSetup	Analysis.Setup.Vector.Graph.Operation.Line1.Cursor1.Active	false
AnalysisSetup	Analysis.Setup.Vector.Graph.Operation.Line1.Cursor1.NormalX	1.39286
AnalysisSetup	Analysis.Setup.Vector.Graph.Operation.Line1.Cursor1.NormalY	0.5
AnalysisSetup	Analysis.Setup.Vector.Graph.Operation.Line1.Cursor2.Enabled	false
AnalysisSetup	Analysis.Setup.Vector.Graph.Operation.Line1.Cursor2.Active	false
AnalysisSetup	Analysis.Setup.Vector.Graph.Operation.Line1.Cursor2.NormalX	1.39286
AnalysisSetup	Analysis.Setup.Vector.Graph.Operation.Line1.Cursor2.NormalY	0.5
AnalysisSetup	Analysis.Setup.Vector.Graph.Operation.Line1.Gradient
AnalysisSetup	Analysis.Setup.Vector.Graph.Operation.Line2.Enabled	false
AnalysisSetup	Analysis.Setup.Vector.Graph.Operation.Line2.Active	false
AnalysisSetup	Analysis.Setup.Vector.Graph.Operation.Line2.Fix	false
AnalysisSetup	Analysis.Setup.Vector.Graph.Operation.Line2.Type	1
AnalysisSetup	Analysis.Setup.Vector.Graph.Operation.Line2.YAxisIndex	0
AnalysisSetup	Analysis.Setup.Vector.Graph.Operation.Line2.LastIndex	-1
AnalysisSetup	Analysis.Setup.Vector.Graph.Operation.Line2.LastStep	-1
AnalysisSetup	Analysis.Setup.Vector.Graph.Operation.Line2.Cursor1.Enabled	false
AnalysisSetup	Analysis.Setup.Vector.Graph.Operation.Line2.Cursor1.Active	false
AnalysisSetup	Analysis.Setup.Vector.Graph.Operation.Line2.Cursor1.NormalX	1.39286
AnalysisSetup	Analysis.Setup.Vector.Graph.Operation.Line2.Cursor1.NormalY	0.5
AnalysisSetup	Analysis.Setup.Vector.Graph.Operation.Line2.Cursor2.Enabled	false
AnalysisSetup	Analysis.Setup.Vector.Graph.Operation.Line2.Cursor2.Active	false
AnalysisSetup	Analysis.Setup.Vector.Graph.Operation.Line2.Cursor2.NormalX	1.39286
AnalysisSetup	Analysis.Setup.Vector.Graph.Operation.Line2.Cursor2.NormalY	0.5
AnalysisSetup	Analysis.Setup.Vector.Graph.Operation.Line2.Gradient
AnalysisSetup	Analysis.Setup.Vector.Graph.Preference.BackgroundColor	-1
AnalysisSetup	Analysis.Setup.Vector.Graph.Preference.TextColor	-16777216
AnalysisSetup	Analysis.Setup.Vector.Graph.Preference.GridColor	-3618616
AnalysisSetup	Analysis.Setup.Vector.Graph.Preference.LineColor	-65336
AnalysisSetup	Analysis.Setup.Vector.Graph.Preference.Plots.Y1.Visible	true
AnalysisSetup	Analysis.Setup.Vector.Graph.Preference.Plots.Y1.PlotColor	-16777036
AnalysisSetup	Analysis.Setup.Vector.Graph.Preference.Plots.Y1.Thickness	1
AnalysisSetup	Analysis.Setup.Vector.Graph.Preference.Plots.Y2.Visible	true
AnalysisSetup	Analysis.Setup.Vector.Graph.Preference.Plots.Y2.PlotColor	-39936
AnalysisSetup	Analysis.Setup.Vector.Graph.Preference.Plots.Y2.Thickness	1
AnalysisSetup	Analysis.Setup.Vector.Graph.Preference.Plots.Y3.Visible	true
AnalysisSetup	Analysis.Setup.Vector.Graph.Preference.Plots.Y3.PlotColor	-16731136
AnalysisSetup	Analysis.Setup.Vector.Graph.Preference.Plots.Y3.Thickness	1
AnalysisSetup	Analysis.Setup.Vector.Graph.Preference.Plots.Y4.Visible	true
AnalysisSetup	Analysis.Setup.Vector.Graph.Preference.Plots.Y4.PlotColor	-8892376
AnalysisSetup	Analysis.Setup.Vector.Graph.Preference.Plots.Y4.Thickness	1
AnalysisSetup	Analysis.Setup.Vector.Graph.Preference.Plots.Y5.Visible	true
AnalysisSetup	Analysis.Setup.Vector.Graph.Preference.Plots.Y5.PlotColor	-65536
AnalysisSetup	Analysis.Setup.Vector.Graph.Preference.Plots.Y5.Thickness	1
AnalysisSetup	Analysis.Setup.Vector.Graph.Preference.Plots.Y6.Visible	true
AnalysisSetup	Analysis.Setup.Vector.Graph.Preference.Plots.Y6.PlotColor	-14336
AnalysisSetup	Analysis.Setup.Vector.Graph.Preference.Plots.Y6.Thickness	1
AnalysisSetup	Analysis.Setup.Vector.Graph.Preference.Plots.Y7.Visible	true
AnalysisSetup	Analysis.Setup.Vector.Graph.Preference.Plots.Y7.PlotColor	-6946586
AnalysisSetup	Analysis.Setup.Vector.Graph.Preference.Plots.Y7.Thickness	1
AnalysisSetup	Analysis.Setup.Vector.Graph.Preference.Plots.Y8.Visible	true
AnalysisSetup	Analysis.Setup.Vector.Graph.Preference.Plots.Y8.PlotColor	-16733546
AnalysisSetup	Analysis.Setup.Vector.Graph.Preference.Plots.Y8.Thickness	1
AnalysisSetup	Analysis.Setup.Vector.Graph.Preference.Text.AxisTitle.FontName	Tahoma
AnalysisSetup	Analysis.Setup.Vector.Graph.Preference.Text.AxisTitle.RelativeSize	Medium
AnalysisSetup	Analysis.Setup.Vector.Graph.Preference.Text.AxisTitle.Size	7
AnalysisSetup	Analysis.Setup.Vector.Graph.Preference.Text.ScaleText.FontName	Tahoma
AnalysisSetup	Analysis.Setup.Vector.Graph.Preference.Text.ScaleText.RelativeSize	Medium
AnalysisSetup	Analysis.Setup.Vector.Graph.Preference.Text.ScaleText.Size	7
AnalysisSetup	Analysis.Setup.Vector.Graph.Preference.Text.Legend.FontName	Tahoma
AnalysisSetup	Analysis.Setup.Vector.Graph.Preference.Text.Legend.RelativeSize	Medium
AnalysisSetup	Analysis.Setup.Vector.Graph.Preference.Text.Legend.Size	7
AnalysisSetup	Analysis.Setup.Vector.Graph.Preference.Scale.LogTickedDecadeCount	6
AnalysisSetup	Analysis.Setup.Vector.Graph.Preference.GridVisible	true
AnalysisSetup	Analysis.Setup.Vector.List.Datum.Name	I1	I2	I3	I4	V1	V2	V3	V4	drop
AnalysisSetup	Analysis.Setup.Vector.List.Datum.Unit	A	A	A	A	V	V	V	V	V
AnalysisSetup	Analysis.Setup.Preference.GraphVisible	true
AnalysisSetup	Analysis.Setup.Preference.ListVisible	true
AnalysisSetup	Analysis.Setup.Preference.ScalarVisible	true
AnalysisSetup	Analysis.Setup.Title	4-Point R Measurement Test
Dimension1	42	42	42	42	42	42	42	42	42	42
Dimension2	1	1	1	1	1	1	1	1	1	1
DataName	I1	I2	I3	V4	V2	V3	V1	I4	drop	R	flipped drop
DataValue	-1e-09	0	0	0	-0.23736	-0.493922	-0.7304	9.8514e-10	0.256562	-2.56562e+08	-0.256562
DataValue	-9e-10	0	0	0	-0.220458	-0.464238	-0.68102	9.0049e-10	0.24378	-2.70867e+08	-0.24378
DataValue	-8e-10	0	0	0	-0.198944	-0.416412	-0.609688	7.9727e-10	0.217468	-271835000	-0.217468
DataValue	-7e-10	0	0	0	-0.17638	-0.366834	-0.535038	7.0381e-10	0.190454	-2.72077e+08	-0.190454
DataValue	-6e-10	0	0	0	-0.153104	-0.317094	-0.463728	6.0088e-10	0.16399	-2.73317e+08	-0.16399
DataValue	-5e-10	0	0	0	-0.128446	-0.266538	-0.388662	4.9968e-10	0.138092	-2.76184e+08	-0.138092
DataValue	-4e-10	0	0	0	-0.100776	-0.213298	-0.312198	3.9779e-10	0.112522	-281305000	-0.112522
DataValue	-3e-10	0	0	0	-0.077972	-0.162994	-0.237332	3.0503e-10	0.085022	-2.83407e+08	-0.085022
DataValue	-2e-10	0	0	0	-0.052306	-0.110676	-0.159852	2.0679e-10	0.05837	-291850000	-0.05837
DataValue	-1e-10	0	0	0	-0.026344	-0.056592	-0.082352	1.0118e-10	0.030248	-3.0248e+08	-0.030248
DataValue	0	0	0	0	-0.000462	-0.00269	-0.00329	-1.05e-12	0.002228		-0.002228
DataValue	1e-10	0	0	0	0.025482	0.051478	0.075254	-9.916e-11	-0.025996	-2.5996e+08	0.025996
DataValue	2e-10	0	0	0	0.05154	0.106182	0.15497	-1.9375e-10	-0.054642	-273210000	0.054642
DataValue	3e-10	0	0	0	0.077936	0.160602	0.233038	-3.0079e-10	-0.082666	-2.75553e+08	0.082666
DataValue	4e-10	0	0	0	0.1045	0.2154	0.312622	-3.9952e-10	-0.1109	-2.7725e+08	0.1109
DataValue	5e-10	0	0	0	0.131998	0.27125	0.393116	-4.9914e-10	-0.139252	-2.78504e+08	0.139252
DataValue	6e-10	0	0	0	0.15618	0.322604	0.468622	-6.4904e-10	-0.166424	-2.77373e+08	0.166424
DataValue	7e-10	0	0	0	0.180436	0.37491	0.544788	-6.9437e-10	-0.194474	-2.7782e+08	0.194474
DataValue	8e-10	0	0	0	0.206602	0.427756	0.619096	-7.9717e-10	-0.221154	-276442500	0.221154
DataValue	9e-10	0	0	0	0.229	0.479286	0.695048	-9.0089e-10	-0.250286	-2.78096e+08	0.250286
DataValue	1e-09	0	0	0	0.257186	0.530914	0.769524	-9.9799e-10	-0.273728	-273728000	0.273728
DataValue	1e-09	0	0	0	0.259268	0.533034	0.773008	-1.00065e-09	-0.273766	-273766000	0.273766
DataValue	9e-10	0	0	0	0.233524	0.481974	0.700522	-8.8154e-10	-0.24845	-2.76056e+08	0.24845
DataValue	8e-10	0	0	0	0.209612	0.432572	0.62613	-7.9436e-10	-0.22296	-2.787e+08	0.22296
DataValue	7e-10	0	0	0	0.1833	0.38135	0.552438	-7.0181e-10	-0.19805	-2.82929e+08	0.19805
DataValue	6e-10	0	0	0	0.157806	0.32988	0.477684	-6.0388e-10	-0.172074	-286790000	0.172074
DataValue	5e-10	0	0	0	0.13327	0.277582	0.400882	-4.9846e-10	-0.144312	-288624000	0.144312
DataValue	4e-10	0	0	0	0.107004	0.223104	0.32237	-3.8567e-10	-0.1161	-290250000	0.1161
DataValue	3e-10	0	0	0	0.08047	0.169064	0.244114	-2.9877e-10	-0.088594	-2.95313e+08	0.088594
DataValue	2e-10	0	0	0	0.055422	0.113402	0.164566	-1.9951e-10	-0.05798	-2.899e+08	0.05798
DataValue	1e-10	0	0	0	0.027862	0.058164	0.084334	-1.0149e-10	-0.030302	-303020000	0.030302
DataValue	0	0	0	0	0.000772	0.002704	0.0041	-3.63e-12	-0.001932		0.001932											Resistance(Ohms)	Number of cables	Gap size (m)
DataValue	-1e-10	0	0	0	-0.025856	-0.052846	-0.076566	1.0072e-10	0.02699	-2.699e+08	-0.02699											2.77778e+08	10	0.0002
DataValue	-2e-10	0	0	0	-0.051878	-0.107476	-0.15603	1.985e-10	0.055598	-2.7799e+08	-0.055598											Number of fibers per cable	Total number of fibers	single fiber diameter (m)
DataValue	-3e-10	0	0	0	-0.077884	-0.162308	-0.235444	2.97e-10	0.084424	-2.81413e+08	-0.084424											35	350	5e-08
DataValue	-4e-10	0	0	0	-0.10462	-0.218154	-0.315806	3.9867e-10	0.113534	-283835000	-0.113534											Single fiber cross-sectional area (m^2)	Single fiber resistivity (Ohm*m)	Single fiber conductivity (S/m)
DataValue	-5e-10	0	0	0	-0.130118	-0.272168	-0.394524	5.1043e-10	0.14205	-2.841e+08	-0.14205											1.9635e-15	0.954477	1.04769
DataValue	-6e-10	0	0	0	-0.154658	-0.322658	-0.470906	6.0023e-10	0.168	-280000000	-0.168											Single fiber conductivity (S/cm)
DataValue	-7e-10	0	0	0	-0.178494	-0.374084	-0.545308	6.9703e-10	0.19559	-2.79414e+08	-0.19559											0.0104769
DataValue	-8e-10	0	0	0	-0.202266	-0.42617	-0.619654	7.9992e-10	0.223904	-279880000	-0.223904
DataValue	-9e-10	0	0	0	-0.223794	-0.473244	-0.69363	8.9706e-10	0.24945	-2.77167e+08	-0.24945
DataValue	-1e-09	0	0	0	-0.244046	-0.519642	-0.764606	1.00971e-09	0.275596	-2.75596e+08	-0.275596
