# Supplementary material for: Long-distance electron transport in multicellular freshwater cable bacteria
Source: eLife. 2024 Aug 29;12:RP91097. doi: 10.7554/eLife.91097 (PMC11361709; doi:10.7554/eLife.91097)
Supplement: Figure 8—source data 4. [file elife-91097-fig8-data4.xlsx]

## Sheet: 4-Point R Measurement Test ((6)
SetupTitle	4-Point R Measurement Test
PrimitiveTest	I/V Sweep
TestParameter	Context.MainFrame	4156C
TestParameter	Channel.UnitType	SMU	SMU	SMU	SMU
TestParameter	Channel.Unit	SMU1:HR	SMU4:HR	SMU2:HR	SMU3:HR
TestParameter	Channel.IName	I2	I3	I1	I4
TestParameter	Channel.VName	V2	V3	V1	V4
TestParameter	Channel.Mode	I	I	I	V
TestParameter	Channel.Func	CONST	CONST	VAR1	CONST
TestParameter	Channel.Index
TestParameter	Channel.Time
TestParameter	Measurement.Port.Unit	SMU1:HR	SMU4:HR	SMU2:HR	SMU3:HR
TestParameter	Measurement.Port.SeriesResistor	NONE	NONE	NONE	NONE
TestParameter	Measurement.Port.Filter	ON	ON	ON	ON
TestParameter	Measurement.Primary.Locus	Double
TestParameter	Measurement.Primary.Scale	LINEAR
TestParameter	Measurement.Primary.Start	-1e-09
TestParameter	Measurement.Primary.Stop	1e-09
TestParameter	Measurement.Primary.Step	1e-10
TestParameter	Measurement.Primary.Compliance	5
TestParameter	Measurement.Primary.PowerCompliance	0
TestParameter	Measurement.Aborting.Condition	STOP AT ANY ABNORMAL
TestParameter	Measurement.PostOutput.Value	START
TestParameter	Measurement.PostOutput.Retention	OFF
TestParameter	Measurement.Bias.Source	0	0	-1e-09	0
TestParameter	Measurement.Bias.Compliance	10	10	5	0.001
TestParameter	Measurement.Monitor.Unit	SMU1:HR	SMU4:HR	SMU2:HR	SMU3:HR
TestParameter	Measurement.Monitor.Adc	HR ADC	HR ADC	HR ADC	HR ADC
TestParameter	Measurement.Monitor.RangingMode	AUTO	AUTO	AUTO	AUTO
TestParameter	Measurement.Monitor.RangeBoundary
TestParameter	Measurement.Timing.Hold	2
TestParameter	Measurement.Timing.Delay	2
TestParameter	Measurement.Adc.HighResolution.AutoZero	ON
TestParameter	Measurement.Adc.HighResolution.Mode	PLC
TestParameter	Measurement.Adc.HighResolution.Coeff	1
TestParameter	Measurement.Ag16440ASelector.SemiconductorRelay.Channel1	DEFAULT
TestParameter	Measurement.Ag16440ASelector.SemiconductorRelay.Channel3	DEFAULT
TestParameter	Function.User.Name	drop	R
TestParameter	Function.User.Unit	V	ohm
TestParameter	Function.User.Definition	V2-V3	drop/I1
TestParameter	Output.Graph.Enabled	true
TestParameter	Output.Graph.XAxis.Data	drop
TestParameter	Output.Graph.XAxis.Scale	Linear
TestParameter	Output.Graph.XAxis.Left	0
TestParameter	Output.Graph.XAxis.Right	1
TestParameter	Output.Graph.YAxis.Data	I1
TestParameter	Output.Graph.YAxis.Scale	Linear
TestParameter	Output.Graph.YAxis.Bottom	-1e-10
TestParameter	Output.Graph.YAxis.Top	1e-10
TestParameter	Output.Graph.YAxis.Group
TestParameter	Output.List.Data	I1	I2	I3	I4	V1	V2	V3	V4	drop
TestParameter	AutoAnalysis.Interpolation	false
TestParameter	AutoAnalysis.Line1.Enabled	false
TestParameter	AutoAnalysis.Line1.Type	1
TestParameter	AutoAnalysis.Line1.Fix	True
TestParameter	AutoAnalysis.Line1.YAxis	0
TestParameter	AutoAnalysis.Line1.Point1.Type	0
TestParameter	AutoAnalysis.Line1.Point1.XY.X
TestParameter	AutoAnalysis.Line1.Point1.XY.Y
TestParameter	AutoAnalysis.Line1.Point1.Data.Var
TestParameter	AutoAnalysis.Line1.Point1.Data.Condition
TestParameter	AutoAnalysis.Line1.Point1.Data.Start	false
TestParameter	AutoAnalysis.Line1.Point1.Data.StartVar
TestParameter	AutoAnalysis.Line1.Point1.Data.StartCondition
TestParameter	AutoAnalysis.Line1.Point2.Type	0
TestParameter	AutoAnalysis.Line1.Point2.XY.X
TestParameter	AutoAnalysis.Line1.Point2.XY.Y
TestParameter	AutoAnalysis.Line1.Point2.Data.Var
TestParameter	AutoAnalysis.Line1.Point2.Data.Condition
TestParameter	AutoAnalysis.Line1.Point2.Data.Start	false
TestParameter	AutoAnalysis.Line1.Point2.Data.StartVar
TestParameter	AutoAnalysis.Line1.Point2.Data.StartCondition
TestParameter	AutoAnalysis.Line1.GradientExpr	0
TestParameter	AutoAnalysis.Line2.Enabled	false
TestParameter	AutoAnalysis.Line2.Type	1
TestParameter	AutoAnalysis.Line2.Fix	True
TestParameter	AutoAnalysis.Line2.YAxis	0
TestParameter	AutoAnalysis.Line2.Point1.Type	0
TestParameter	AutoAnalysis.Line2.Point1.XY.X
TestParameter	AutoAnalysis.Line2.Point1.XY.Y
TestParameter	AutoAnalysis.Line2.Point1.Data.Var
TestParameter	AutoAnalysis.Line2.Point1.Data.Condition
TestParameter	AutoAnalysis.Line2.Point1.Data.Start	false
TestParameter	AutoAnalysis.Line2.Point1.Data.StartVar
TestParameter	AutoAnalysis.Line2.Point1.Data.StartCondition
TestParameter	AutoAnalysis.Line2.Point2.Type	0
TestParameter	AutoAnalysis.Line2.Point2.XY.X
TestParameter	AutoAnalysis.Line2.Point2.XY.Y
TestParameter	AutoAnalysis.Line2.Point2.Data.Var
TestParameter	AutoAnalysis.Line2.Point2.Data.Condition
TestParameter	AutoAnalysis.Line2.Point2.Data.Start	false
TestParameter	AutoAnalysis.Line2.Point2.Data.StartVar
TestParameter	AutoAnalysis.Line2.Point2.Data.StartCondition
TestParameter	AutoAnalysis.Line2.GradientExpr	0
TestParameter	AutoAnalysis.Marker.Enabled	false
TestParameter	AutoAnalysis.Marker.Data.Var
TestParameter	AutoAnalysis.Marker.Data.Condition
TestParameter	AutoAnalysis.Marker.Data.Start	false
TestParameter	AutoAnalysis.Marker.Data.StartVar
TestParameter	AutoAnalysis.Marker.Data.StartCondition
MetaData	TestRecord.EntryPoint	true
MetaData	TestRecord.RecordTime	03/10/2021 17:29:15
MetaData	TestRecord.TestTarget
MetaData	TestRecord.IterationIndex	6
MetaData	TestRecord.Preservation	true
MetaData	TestRecord.Flag
MetaData	TestRecord.Remarks	Mungi Cables 20 um (2)
MetaData	TestRecord.LinkKey	78454840-fc48-41ef-bcb5-75c6e09617b5
AnalysisSetup	Analysis.Setup.Vector.Graph.Enabled	true
AnalysisSetup	Analysis.Setup.Vector.Graph.ActiveYAxis	0
AnalysisSetup	Analysis.Setup.Vector.Graph.LeftYAxis	0
AnalysisSetup	Analysis.Setup.Vector.Graph.RightYAxis	-1
AnalysisSetup	Analysis.Setup.Vector.Graph.XAxis.Name	drop
AnalysisSetup	Analysis.Setup.Vector.Graph.XAxis.GroupName
AnalysisSetup	Analysis.Setup.Vector.Graph.XAxis.Unit	V
AnalysisSetup	Analysis.Setup.Vector.Graph.XAxis.Scale	Linear
AnalysisSetup	Analysis.Setup.Vector.Graph.XAxis.Left	-0.037
AnalysisSetup	Analysis.Setup.Vector.Graph.XAxis.Right	0.037
AnalysisSetup	Analysis.Setup.Vector.Graph.YAxis.Name	I1
AnalysisSetup	Analysis.Setup.Vector.Graph.YAxis.GroupName
AnalysisSetup	Analysis.Setup.Vector.Graph.YAxis.Unit	A
AnalysisSetup	Analysis.Setup.Vector.Graph.YAxis.Scale	Linear
AnalysisSetup	Analysis.Setup.Vector.Graph.YAxis.Bottom	-1e-09
AnalysisSetup	Analysis.Setup.Vector.Graph.YAxis.Top	1e-09
AnalysisSetup	Analysis.Setup.Vector.Graph.Operation.Marker.Enabled	false
AnalysisSetup	Analysis.Setup.Vector.Graph.Operation.Marker.Interpolation	false
AnalysisSetup	Analysis.Setup.Vector.Graph.Operation.Marker.Index	0
AnalysisSetup	Analysis.Setup.Vector.Graph.Operation.Marker.Step	0
AnalysisSetup	Analysis.Setup.Vector.Graph.Operation.Cursor.Enabled	false
AnalysisSetup	Analysis.Setup.Vector.Graph.Operation.Cursor.Active	true
AnalysisSetup	Analysis.Setup.Vector.Graph.Operation.Cursor.NormalX	7.25676
AnalysisSetup	Analysis.Setup.Vector.Graph.Operation.Cursor.NormalY	0.5
AnalysisSetup	Analysis.Setup.Vector.Graph.Operation.Line1.Enabled	false
AnalysisSetup	Analysis.Setup.Vector.Graph.Operation.Line1.Active	false
AnalysisSetup	Analysis.Setup.Vector.Graph.Operation.Line1.Fix	false
AnalysisSetup	Analysis.Setup.Vector.Graph.Operation.Line1.Type	1
AnalysisSetup	Analysis.Setup.Vector.Graph.Operation.Line1.YAxisIndex	0
AnalysisSetup	Analysis.Setup.Vector.Graph.Operation.Line1.LastIndex	-1
AnalysisSetup	Analysis.Setup.Vector.Graph.Operation.Line1.LastStep	-1
AnalysisSetup	Analysis.Setup.Vector.Graph.Operation.Line1.Cursor1.Enabled	false
AnalysisSetup	Analysis.Setup.Vector.Graph.Operation.Line1.Cursor1.Active	false
AnalysisSetup	Analysis.Setup.Vector.Graph.Operation.Line1.Cursor1.NormalX	7.25676
AnalysisSetup	Analysis.Setup.Vector.Graph.Operation.Line1.Cursor1.NormalY	0.5
AnalysisSetup	Analysis.Setup.Vector.Graph.Operation.Line1.Cursor2.Enabled	false
AnalysisSetup	Analysis.Setup.Vector.Graph.Operation.Line1.Cursor2.Active	false
AnalysisSetup	Analysis.Setup.Vector.Graph.Operation.Line1.Cursor2.NormalX	7.25676
AnalysisSetup	Analysis.Setup.Vector.Graph.Operation.Line1.Cursor2.NormalY	0.5
AnalysisSetup	Analysis.Setup.Vector.Graph.Operation.Line1.Gradient
AnalysisSetup	Analysis.Setup.Vector.Graph.Operation.Line2.Enabled	false
AnalysisSetup	Analysis.Setup.Vector.Graph.Operation.Line2.Active	false
AnalysisSetup	Analysis.Setup.Vector.Graph.Operation.Line2.Fix	false
AnalysisSetup	Analysis.Setup.Vector.Graph.Operation.Line2.Type	1
AnalysisSetup	Analysis.Setup.Vector.Graph.Operation.Line2.YAxisIndex	0
AnalysisSetup	Analysis.Setup.Vector.Graph.Operation.Line2.LastIndex	-1
AnalysisSetup	Analysis.Setup.Vector.Graph.Operation.Line2.LastStep	-1
AnalysisSetup	Analysis.Setup.Vector.Graph.Operation.Line2.Cursor1.Enabled	false
AnalysisSetup	Analysis.Setup.Vector.Graph.Operation.Line2.Cursor1.Active	false
AnalysisSetup	Analysis.Setup.Vector.Graph.Operation.Line2.Cursor1.NormalX	7.25676
AnalysisSetup	Analysis.Setup.Vector.Graph.Operation.Line2.Cursor1.NormalY	0.5
AnalysisSetup	Analysis.Setup.Vector.Graph.Operation.Line2.Cursor2.Enabled	false
AnalysisSetup	Analysis.Setup.Vector.Graph.Operation.Line2.Cursor2.Active	false
AnalysisSetup	Analysis.Setup.Vector.Graph.Operation.Line2.Cursor2.NormalX	7.25676
AnalysisSetup	Analysis.Setup.Vector.Graph.Operation.Line2.Cursor2.NormalY	0.5
AnalysisSetup	Analysis.Setup.Vector.Graph.Operation.Line2.Gradient
AnalysisSetup	Analysis.Setup.Vector.Graph.Preference.BackgroundColor	-1
AnalysisSetup	Analysis.Setup.Vector.Graph.Preference.TextColor	-16777216
AnalysisSetup	Analysis.Setup.Vector.Graph.Preference.GridColor	-3618616
AnalysisSetup	Analysis.Setup.Vector.Graph.Preference.LineColor	-65336
AnalysisSetup	Analysis.Setup.Vector.Graph.Preference.Plots.Y1.Visible	true
AnalysisSetup	Analysis.Setup.Vector.Graph.Preference.Plots.Y1.PlotColor	-16777036
AnalysisSetup	Analysis.Setup.Vector.Graph.Preference.Plots.Y1.Thickness	1
AnalysisSetup	Analysis.Setup.Vector.Graph.Preference.Plots.Y2.Visible	true
AnalysisSetup	Analysis.Setup.Vector.Graph.Preference.Plots.Y2.PlotColor	-39936
AnalysisSetup	Analysis.Setup.Vector.Graph.Preference.Plots.Y2.Thickness	1
AnalysisSetup	Analysis.Setup.Vector.Graph.Preference.Plots.Y3.Visible	true
AnalysisSetup	Analysis.Setup.Vector.Graph.Preference.Plots.Y3.PlotColor	-16731136
AnalysisSetup	Analysis.Setup.Vector.Graph.Preference.Plots.Y3.Thickness	1
AnalysisSetup	Analysis.Setup.Vector.Graph.Preference.Plots.Y4.Visible	true
AnalysisSetup	Analysis.Setup.Vector.Graph.Preference.Plots.Y4.PlotColor	-8892376
AnalysisSetup	Analysis.Setup.Vector.Graph.Preference.Plots.Y4.Thickness	1
AnalysisSetup	Analysis.Setup.Vector.Graph.Preference.Plots.Y5.Visible	true
AnalysisSetup	Analysis.Setup.Vector.Graph.Preference.Plots.Y5.PlotColor	-65536
AnalysisSetup	Analysis.Setup.Vector.Graph.Preference.Plots.Y5.Thickness	1
AnalysisSetup	Analysis.Setup.Vector.Graph.Preference.Plots.Y6.Visible	true
AnalysisSetup	Analysis.Setup.Vector.Graph.Preference.Plots.Y6.PlotColor	-14336
AnalysisSetup	Analysis.Setup.Vector.Graph.Preference.Plots.Y6.Thickness	1
AnalysisSetup	Analysis.Setup.Vector.Graph.Preference.Plots.Y7.Visible	true
AnalysisSetup	Analysis.Setup.Vector.Graph.Preference.Plots.Y7.PlotColor	-6946586
AnalysisSetup	Analysis.Setup.Vector.Graph.Preference.Plots.Y7.Thickness	1
AnalysisSetup	Analysis.Setup.Vector.Graph.Preference.Plots.Y8.Visible	true
AnalysisSetup	Analysis.Setup.Vector.Graph.Preference.Plots.Y8.PlotColor	-16733546
AnalysisSetup	Analysis.Setup.Vector.Graph.Preference.Plots.Y8.Thickness	1
AnalysisSetup	Analysis.Setup.Vector.Graph.Preference.Text.AxisTitle.FontName	Tahoma
AnalysisSetup	Analysis.Setup.Vector.Graph.Preference.Text.AxisTitle.RelativeSize	Medium
AnalysisSetup	Analysis.Setup.Vector.Graph.Preference.Text.AxisTitle.Size	7
AnalysisSetup	Analysis.Setup.Vector.Graph.Preference.Text.ScaleText.FontName	Tahoma
AnalysisSetup	Analysis.Setup.Vector.Graph.Preference.Text.ScaleText.RelativeSize	Medium
AnalysisSetup	Analysis.Setup.Vector.Graph.Preference.Text.ScaleText.Size	7
AnalysisSetup	Analysis.Setup.Vector.Graph.Preference.Text.Legend.FontName	Tahoma
AnalysisSetup	Analysis.Setup.Vector.Graph.Preference.Text.Legend.RelativeSize	Medium
AnalysisSetup	Analysis.Setup.Vector.Graph.Preference.Text.Legend.Size	7
AnalysisSetup	Analysis.Setup.Vector.Graph.Preference.Scale.LogTickedDecadeCount	6
AnalysisSetup	Analysis.Setup.Vector.Graph.Preference.GridVisible	true
AnalysisSetup	Analysis.Setup.Vector.List.Datum.Name	I1	I2	I3	I4	V1	V2	V3	V4	drop
AnalysisSetup	Analysis.Setup.Vector.List.Datum.Unit	A	A	A	A	V	V	V	V	V
AnalysisSetup	Analysis.Setup.Preference.GraphVisible	true
AnalysisSetup	Analysis.Setup.Preference.ListVisible	true
AnalysisSetup	Analysis.Setup.Preference.ScalarVisible	true
AnalysisSetup	Analysis.Setup.Title	4-Point R Measurement Test
Dimension1	42	42	42	42	42	42	42	42	42	42
Dimension2	1	1	1	1	1	1	1	1	1	1
DataName	I1	I2	I3	V4	V2	V3	V1	I4	drop	R	flipped drop
DataValue	-1e-09	0	0	0	-0.138536	-0.174248	-0.25431	9.8502e-10	0.035712	-3.5712e+07	-0.035712
DataValue	-9e-10	0	0	0	-0.125042	-0.157476	-0.230066	8.8717e-10	0.032434	-3.60378e+07	-0.032434
DataValue	-8e-10	0	0	0	-0.112194	-0.141042	-0.205068	7.9214e-10	0.028848	-36060000	-0.028848
DataValue	-7e-10	0	0	0	-0.093858	-0.119068	-0.175938	6.9107e-10	0.02521	-3.60143e+07	-0.02521
DataValue	-6e-10	0	0	0	-0.083284	-0.104636	-0.153462	5.8643e-10	0.021352	-3.55867e+07	-0.021352
DataValue	-5e-10	0	0	0	-0.070086	-0.08838	-0.12842	5.0089e-10	0.018294	-36588000	-0.018294
DataValue	-4e-10	0	0	0	-0.055438	-0.070272	-0.102488	4.0231e-10	0.014834	-37085000	-0.014834
DataValue	-3e-10	0	0	0	-0.042718	-0.053518	-0.077526	2.9639e-10	0.0108	-3.6e+07	-0.0108
DataValue	-2e-10	0	0	0	-0.028174	-0.035234	-0.051272	1.991e-10	0.00706	-35300000	-0.00706
DataValue	-1e-10	0	0	0	-0.013978	-0.017458	-0.025528	6.675e-11	0.00348	-3.48e+07	-0.00348
DataValue	0	0	0	0	0.000226	0.000174	0.000112	-3.1e-13	5.2e-05		-5.2e-05
DataValue	1e-10	0	0	0	0.014344	0.017944	0.026032	-1.0106e-10	-0.0036	-3.6e+07	0.0036
DataValue	2e-10	0	0	0	0.028932	0.036276	0.052436	-2.0245e-10	-0.007344	-3.672e+07	0.007344
DataValue	3e-10	0	0	0	0.043522	0.054404	0.078644	-2.8207e-10	-0.010882	-3.62733e+07	0.010882
DataValue	4e-10	0	0	0	0.057824	0.072696	0.104636	-3.9997e-10	-0.014872	-3.718e+07	0.014872
DataValue	5e-10	0	0	0	0.071578	0.089646	0.129818	-4.9763e-10	-0.018068	-3.6136e+07	0.018068
DataValue	6e-10	0	0	0	0.08592	0.107606	0.155914	-5.9691e-10	-0.021686	-3.61433e+07	0.021686
DataValue	7e-10	0	0	0	0.09955	0.12515	0.182064	-7.0002e-10	-0.0256	-3.65714e+07	0.0256
DataValue	8e-10	0	0	0	0.11443	0.143516	0.208388	-7.9735e-10	-0.029086	-36357500	0.029086
DataValue	9e-10	0	0	0	0.12908	0.16152	0.23419	-8.9924e-10	-0.03244	-3.60444e+07	0.03244
DataValue	1e-09	0	0	0	0.144752	0.181526	0.26271	-1.00227e-09	-0.036774	-36774000	0.036774
DataValue	1e-09	0	0	0	0.144868	0.181208	0.262548	-9.9531e-10	-0.03634	-3.634e+07	0.03634
DataValue	9e-10	0	0	0	0.130682	0.16388	0.236748	-8.977e-10	-0.033198	-3.68867e+07	0.033198
DataValue	8e-10	0	0	0	0.118888	0.149288	0.212036	-8.0389e-10	-0.0304	-38000000	0.0304
DataValue	7e-10	0	0	0	0.101076	0.127716	0.185008	-7.0122e-10	-0.02664	-3.80571e+07	0.02664
DataValue	6e-10	0	0	0	0.090708	0.112602	0.161692	-6.2279e-10	-0.021894	-3.649e+07	0.021894
DataValue	5e-10	0	0	0	0.072552	0.09127	0.13227	-5.0328e-10	-0.018718	-3.7436e+07	0.018718
DataValue	4e-10	0	0	0	0.058368	0.073082	0.10583	-4.0341e-10	-0.014714	-3.6785e+07	0.014714
DataValue	3e-10	0	0	0	0.043868	0.054942	0.080048	-2.9676e-10	-0.011074	-3.69133e+07	0.011074
DataValue	2e-10	0	0	0	0.029398	0.03676	0.05304	-1.9877e-10	-0.007362	-36810000	0.007362
DataValue	1e-10	0	0	0	0.014576	0.0183	0.026576	-1.038e-10	-0.003724	-37240000	0.003724
DataValue	0	0	0	0	0.000236	0.000302	0.000368	-4.05e-11	-6.6e-05		6.6e-05											Resistance(Ohms)	Number of cables	Gap size (m)
DataValue	-1e-10	0	0	0	-0.01402	-0.017382	-0.025392	1.0887e-10	0.003362	-3.362e+07	-0.003362											3.7037e+07	10	2e-05
DataValue	-2e-10	0	0	0	-0.029178	-0.03647	-0.052694	1.992e-10	0.007292	-3.646e+07	-0.007292											Number of fibers per cable	Total number of fibers	single fiber diameter (m)
DataValue	-3e-10	0	0	0	-0.042932	-0.053616	-0.078116	2.921e-10	0.010684	-3.56133e+07	-0.010684											35	350	5e-08
DataValue	-4e-10	0	0	0	-0.058194	-0.072934	-0.105366	4.0608e-10	0.01474	-36850000	-0.01474											Single fiber cross-sectional area (m^2)	Single fiber resistivity (Ohm*m)	Single fiber conductivity (S/m)
DataValue	-5e-10	0	0	0	-0.07236	-0.090918	-0.131886	4.9785e-10	0.018558	-37116000	-0.018558											1.9635e-15	1.27264	0.785771
DataValue	-6e-10	0	0	0	-0.087812	-0.109772	-0.15837	6.013e-10	0.02196	-3.66e+07	-0.02196											Single fiber conductivity (S/cm)
DataValue	-7e-10	0	0	0	-0.101796	-0.127346	-0.184382	7.1952e-10	0.02555	-3.65e+07	-0.02555											0.00785771
DataValue	-8e-10	0	0	0	-0.11559	-0.1451	-0.210296	7.955e-10	0.02951	-36887500	-0.02951
DataValue	-9e-10	0	0	0	-0.12791	-0.161772	-0.234874	8.9582e-10	0.033862	-3.76244e+07	-0.033862
DataValue	-1e-09	0	0	0	-0.142812	-0.179682	-0.261298	9.9997e-10	0.03687	-3.687e+07	-0.03687
												Conductance 20 um (S)	Conductance 200 um (S)
												2.7619e-08	5.989e-09
												Resistance 20 um (Ohm)	Resistance 200 um (Ohm)
												3.6207e+07	1.66973e+08
												Number of cables	Number of cables 1
												1
												Numberof fibers per cable	Number of fibers per cable
												35	35
												N (total number of fibers)	N (total number of fibers)
												35	35
												Fiber diameter (m)	Fiber diameter (m)
												5e-08	5e-08
												Fiber cross-sectional area (m^2)	Fiber cross-sectional area (m^2)
												1.9635e-15	1.9635e-15
												Gap size (m)	Gap size (m)
												2e-05	0.0002
												Single fiber conductivty 20 um (S/m)	Single fiber conductivity 200 um (S/m)
												8.03785	17.4296
												Single fiber conductivity 20 um (uS/cm)	Single fiber conductivity 200 um (uS/cm)
												80.3785	174.296
