# Supplementary material for: Long-distance electron transport in multicellular freshwater cable bacteria
Source: eLife. 2024 Aug 29;12:RP91097. doi: 10.7554/eLife.91097 (PMC11361709; doi:10.7554/eLife.91097)
Supplement: Figure 8—source data 6. [file elife-91097-fig8-data6.xlsx]

## Sheet: 4-Point R Measurement Test ((17
SetupTitle	4-Point R Measurement Test
PrimitiveTest	I/V Sweep
TestParameter	Context.MainFrame	4156C
TestParameter	Channel.UnitType	SMU	SMU	SMU	SMU
TestParameter	Channel.Unit	SMU1:HR	SMU4:HR	SMU2:HR	SMU3:HR
TestParameter	Channel.IName	I2	I3	I1	I4
TestParameter	Channel.VName	V2	V3	V1	V4
TestParameter	Channel.Mode	I	I	I	V
TestParameter	Channel.Func	CONST	CONST	VAR1	CONST
TestParameter	Channel.Index
TestParameter	Channel.Time
TestParameter	Measurement.Port.Unit	SMU1:HR	SMU4:HR	SMU2:HR	SMU3:HR
TestParameter	Measurement.Port.SeriesResistor	NONE	NONE	NONE	NONE
TestParameter	Measurement.Port.Filter	ON	ON	ON	ON
TestParameter	Measurement.Primary.Locus	Double
TestParameter	Measurement.Primary.Scale	LINEAR
TestParameter	Measurement.Primary.Start	-1e-09
TestParameter	Measurement.Primary.Stop	1e-09
TestParameter	Measurement.Primary.Step	1e-10
TestParameter	Measurement.Primary.Compliance	5
TestParameter	Measurement.Primary.PowerCompliance	0
TestParameter	Measurement.Aborting.Condition	STOP AT ANY ABNORMAL
TestParameter	Measurement.PostOutput.Value	START
TestParameter	Measurement.PostOutput.Retention	OFF
TestParameter	Measurement.Bias.Source	0	0	-1e-09	0
TestParameter	Measurement.Bias.Compliance	10	10	5	0.001
TestParameter	Measurement.Monitor.Unit	SMU1:HR	SMU4:HR	SMU2:HR	SMU3:HR
TestParameter	Measurement.Monitor.Adc	HR ADC	HR ADC	HR ADC	HR ADC
TestParameter	Measurement.Monitor.RangingMode	AUTO	AUTO	AUTO	AUTO
TestParameter	Measurement.Monitor.RangeBoundary
TestParameter	Measurement.Timing.Hold	2
TestParameter	Measurement.Timing.Delay	2
TestParameter	Measurement.Adc.HighResolution.AutoZero	ON
TestParameter	Measurement.Adc.HighResolution.Mode	PLC
TestParameter	Measurement.Adc.HighResolution.Coeff	1
TestParameter	Measurement.Ag16440ASelector.SemiconductorRelay.Channel1	DEFAULT
TestParameter	Measurement.Ag16440ASelector.SemiconductorRelay.Channel3	DEFAULT
TestParameter	Function.User.Name	drop	R
TestParameter	Function.User.Unit	V	ohm
TestParameter	Function.User.Definition	V2-V3	drop/I1
TestParameter	Output.Graph.Enabled	true
TestParameter	Output.Graph.XAxis.Data	drop
TestParameter	Output.Graph.XAxis.Scale	Linear
TestParameter	Output.Graph.XAxis.Left	0
TestParameter	Output.Graph.XAxis.Right	1
TestParameter	Output.Graph.YAxis.Data	I1
TestParameter	Output.Graph.YAxis.Scale	Linear
TestParameter	Output.Graph.YAxis.Bottom	-1e-10
TestParameter	Output.Graph.YAxis.Top	1e-10
TestParameter	Output.Graph.YAxis.Group
TestParameter	Output.List.Data	I1	I2	I3	I4	V1	V2	V3	V4	drop
TestParameter	AutoAnalysis.Interpolation	false
TestParameter	AutoAnalysis.Line1.Enabled	false
TestParameter	AutoAnalysis.Line1.Type	1
TestParameter	AutoAnalysis.Line1.Fix	True
TestParameter	AutoAnalysis.Line1.YAxis	0
TestParameter	AutoAnalysis.Line1.Point1.Type	0
TestParameter	AutoAnalysis.Line1.Point1.XY.X
TestParameter	AutoAnalysis.Line1.Point1.XY.Y
TestParameter	AutoAnalysis.Line1.Point1.Data.Var
TestParameter	AutoAnalysis.Line1.Point1.Data.Condition
TestParameter	AutoAnalysis.Line1.Point1.Data.Start	false
TestParameter	AutoAnalysis.Line1.Point1.Data.StartVar
TestParameter	AutoAnalysis.Line1.Point1.Data.StartCondition
TestParameter	AutoAnalysis.Line1.Point2.Type	0
TestParameter	AutoAnalysis.Line1.Point2.XY.X
TestParameter	AutoAnalysis.Line1.Point2.XY.Y
TestParameter	AutoAnalysis.Line1.Point2.Data.Var
TestParameter	AutoAnalysis.Line1.Point2.Data.Condition
TestParameter	AutoAnalysis.Line1.Point2.Data.Start	false
TestParameter	AutoAnalysis.Line1.Point2.Data.StartVar
TestParameter	AutoAnalysis.Line1.Point2.Data.StartCondition
TestParameter	AutoAnalysis.Line1.GradientExpr	0
TestParameter	AutoAnalysis.Line2.Enabled	false
TestParameter	AutoAnalysis.Line2.Type	1
TestParameter	AutoAnalysis.Line2.Fix	True
TestParameter	AutoAnalysis.Line2.YAxis	0
TestParameter	AutoAnalysis.Line2.Point1.Type	0
TestParameter	AutoAnalysis.Line2.Point1.XY.X
TestParameter	AutoAnalysis.Line2.Point1.XY.Y
TestParameter	AutoAnalysis.Line2.Point1.Data.Var
TestParameter	AutoAnalysis.Line2.Point1.Data.Condition
TestParameter	AutoAnalysis.Line2.Point1.Data.Start	false
TestParameter	AutoAnalysis.Line2.Point1.Data.StartVar
TestParameter	AutoAnalysis.Line2.Point1.Data.StartCondition
TestParameter	AutoAnalysis.Line2.Point2.Type	0
TestParameter	AutoAnalysis.Line2.Point2.XY.X
TestParameter	AutoAnalysis.Line2.Point2.XY.Y
TestParameter	AutoAnalysis.Line2.Point2.Data.Var
TestParameter	AutoAnalysis.Line2.Point2.Data.Condition
TestParameter	AutoAnalysis.Line2.Point2.Data.Start	false
TestParameter	AutoAnalysis.Line2.Point2.Data.StartVar
TestParameter	AutoAnalysis.Line2.Point2.Data.StartCondition
TestParameter	AutoAnalysis.Line2.GradientExpr	0
TestParameter	AutoAnalysis.Marker.Enabled	false
TestParameter	AutoAnalysis.Marker.Data.Var
TestParameter	AutoAnalysis.Marker.Data.Condition
TestParameter	AutoAnalysis.Marker.Data.Start	false
TestParameter	AutoAnalysis.Marker.Data.StartVar
TestParameter	AutoAnalysis.Marker.Data.StartCondition
MetaData	TestRecord.EntryPoint	true
MetaData	TestRecord.RecordTime	03/10/2021 17:59:38
MetaData	TestRecord.TestTarget
MetaData	TestRecord.IterationIndex	17
MetaData	TestRecord.Preservation	true
MetaData	TestRecord.Flag
MetaData	TestRecord.Remarks	Mungi Cables 20 um gap (4)
MetaData	TestRecord.LinkKey	18fc3c53-3d43-4078-a297-cb59279fecd7
AnalysisSetup	Analysis.Setup.Vector.Graph.Enabled	true
AnalysisSetup	Analysis.Setup.Vector.Graph.ActiveYAxis	0
AnalysisSetup	Analysis.Setup.Vector.Graph.LeftYAxis	0
AnalysisSetup	Analysis.Setup.Vector.Graph.RightYAxis	-1
AnalysisSetup	Analysis.Setup.Vector.Graph.XAxis.Name	drop
AnalysisSetup	Analysis.Setup.Vector.Graph.XAxis.GroupName
AnalysisSetup	Analysis.Setup.Vector.Graph.XAxis.Unit	V
AnalysisSetup	Analysis.Setup.Vector.Graph.XAxis.Scale	Linear
AnalysisSetup	Analysis.Setup.Vector.Graph.XAxis.Left	-0.053
AnalysisSetup	Analysis.Setup.Vector.Graph.XAxis.Right	0.056
AnalysisSetup	Analysis.Setup.Vector.Graph.YAxis.Name	I1
AnalysisSetup	Analysis.Setup.Vector.Graph.YAxis.GroupName
AnalysisSetup	Analysis.Setup.Vector.Graph.YAxis.Unit	A
AnalysisSetup	Analysis.Setup.Vector.Graph.YAxis.Scale	Linear
AnalysisSetup	Analysis.Setup.Vector.Graph.YAxis.Bottom	-1e-09
AnalysisSetup	Analysis.Setup.Vector.Graph.YAxis.Top	1e-09
AnalysisSetup	Analysis.Setup.Vector.Graph.Operation.Marker.Enabled	false
AnalysisSetup	Analysis.Setup.Vector.Graph.Operation.Marker.Interpolation	false
AnalysisSetup	Analysis.Setup.Vector.Graph.Operation.Marker.Index	0
AnalysisSetup	Analysis.Setup.Vector.Graph.Operation.Marker.Step	0
AnalysisSetup	Analysis.Setup.Vector.Graph.Operation.Cursor.Enabled	false
AnalysisSetup	Analysis.Setup.Vector.Graph.Operation.Cursor.Active	true
AnalysisSetup	Analysis.Setup.Vector.Graph.Operation.Cursor.NormalX	5.07339
AnalysisSetup	Analysis.Setup.Vector.Graph.Operation.Cursor.NormalY	0.5
AnalysisSetup	Analysis.Setup.Vector.Graph.Operation.Line1.Enabled	false
AnalysisSetup	Analysis.Setup.Vector.Graph.Operation.Line1.Active	false
AnalysisSetup	Analysis.Setup.Vector.Graph.Operation.Line1.Fix	false
AnalysisSetup	Analysis.Setup.Vector.Graph.Operation.Line1.Type	1
AnalysisSetup	Analysis.Setup.Vector.Graph.Operation.Line1.YAxisIndex	0
AnalysisSetup	Analysis.Setup.Vector.Graph.Operation.Line1.LastIndex	-1
AnalysisSetup	Analysis.Setup.Vector.Graph.Operation.Line1.LastStep	-1
AnalysisSetup	Analysis.Setup.Vector.Graph.Operation.Line1.Cursor1.Enabled	false
AnalysisSetup	Analysis.Setup.Vector.Graph.Operation.Line1.Cursor1.Active	false
AnalysisSetup	Analysis.Setup.Vector.Graph.Operation.Line1.Cursor1.NormalX	5.07339
AnalysisSetup	Analysis.Setup.Vector.Graph.Operation.Line1.Cursor1.NormalY	0.5
AnalysisSetup	Analysis.Setup.Vector.Graph.Operation.Line1.Cursor2.Enabled	false
AnalysisSetup	Analysis.Setup.Vector.Graph.Operation.Line1.Cursor2.Active	false
AnalysisSetup	Analysis.Setup.Vector.Graph.Operation.Line1.Cursor2.NormalX	5.07339
AnalysisSetup	Analysis.Setup.Vector.Graph.Operation.Line1.Cursor2.NormalY	0.5
AnalysisSetup	Analysis.Setup.Vector.Graph.Operation.Line1.Gradient
AnalysisSetup	Analysis.Setup.Vector.Graph.Operation.Line2.Enabled	false
AnalysisSetup	Analysis.Setup.Vector.Graph.Operation.Line2.Active	false
AnalysisSetup	Analysis.Setup.Vector.Graph.Operation.Line2.Fix	false
AnalysisSetup	Analysis.Setup.Vector.Graph.Operation.Line2.Type	1
AnalysisSetup	Analysis.Setup.Vector.Graph.Operation.Line2.YAxisIndex	0
AnalysisSetup	Analysis.Setup.Vector.Graph.Operation.Line2.LastIndex	-1
AnalysisSetup	Analysis.Setup.Vector.Graph.Operation.Line2.LastStep	-1
AnalysisSetup	Analysis.Setup.Vector.Graph.Operation.Line2.Cursor1.Enabled	false
AnalysisSetup	Analysis.Setup.Vector.Graph.Operation.Line2.Cursor1.Active	false
AnalysisSetup	Analysis.Setup.Vector.Graph.Operation.Line2.Cursor1.NormalX	5.07339
AnalysisSetup	Analysis.Setup.Vector.Graph.Operation.Line2.Cursor1.NormalY	0.5
AnalysisSetup	Analysis.Setup.Vector.Graph.Operation.Line2.Cursor2.Enabled	false
AnalysisSetup	Analysis.Setup.Vector.Graph.Operation.Line2.Cursor2.Active	false
AnalysisSetup	Analysis.Setup.Vector.Graph.Operation.Line2.Cursor2.NormalX	5.07339
AnalysisSetup	Analysis.Setup.Vector.Graph.Operation.Line2.Cursor2.NormalY	0.5
AnalysisSetup	Analysis.Setup.Vector.Graph.Operation.Line2.Gradient
AnalysisSetup	Analysis.Setup.Vector.Graph.Preference.BackgroundColor	-1
AnalysisSetup	Analysis.Setup.Vector.Graph.Preference.TextColor	-16777216
AnalysisSetup	Analysis.Setup.Vector.Graph.Preference.GridColor	-3618616
AnalysisSetup	Analysis.Setup.Vector.Graph.Preference.LineColor	-65336
AnalysisSetup	Analysis.Setup.Vector.Graph.Preference.Plots.Y1.Visible	true
AnalysisSetup	Analysis.Setup.Vector.Graph.Preference.Plots.Y1.PlotColor	-16777036
AnalysisSetup	Analysis.Setup.Vector.Graph.Preference.Plots.Y1.Thickness	1
AnalysisSetup	Analysis.Setup.Vector.Graph.Preference.Plots.Y2.Visible	true
AnalysisSetup	Analysis.Setup.Vector.Graph.Preference.Plots.Y2.PlotColor	-39936
AnalysisSetup	Analysis.Setup.Vector.Graph.Preference.Plots.Y2.Thickness	1
AnalysisSetup	Analysis.Setup.Vector.Graph.Preference.Plots.Y3.Visible	true
AnalysisSetup	Analysis.Setup.Vector.Graph.Preference.Plots.Y3.PlotColor	-16731136
AnalysisSetup	Analysis.Setup.Vector.Graph.Preference.Plots.Y3.Thickness	1
AnalysisSetup	Analysis.Setup.Vector.Graph.Preference.Plots.Y4.Visible	true
AnalysisSetup	Analysis.Setup.Vector.Graph.Preference.Plots.Y4.PlotColor	-8892376
AnalysisSetup	Analysis.Setup.Vector.Graph.Preference.Plots.Y4.Thickness	1
AnalysisSetup	Analysis.Setup.Vector.Graph.Preference.Plots.Y5.Visible	true
AnalysisSetup	Analysis.Setup.Vector.Graph.Preference.Plots.Y5.PlotColor	-65536
AnalysisSetup	Analysis.Setup.Vector.Graph.Preference.Plots.Y5.Thickness	1
AnalysisSetup	Analysis.Setup.Vector.Graph.Preference.Plots.Y6.Visible	true
AnalysisSetup	Analysis.Setup.Vector.Graph.Preference.Plots.Y6.PlotColor	-14336
AnalysisSetup	Analysis.Setup.Vector.Graph.Preference.Plots.Y6.Thickness	1
AnalysisSetup	Analysis.Setup.Vector.Graph.Preference.Plots.Y7.Visible	true
AnalysisSetup	Analysis.Setup.Vector.Graph.Preference.Plots.Y7.PlotColor	-6946586
AnalysisSetup	Analysis.Setup.Vector.Graph.Preference.Plots.Y7.Thickness	1
AnalysisSetup	Analysis.Setup.Vector.Graph.Preference.Plots.Y8.Visible	true
AnalysisSetup	Analysis.Setup.Vector.Graph.Preference.Plots.Y8.PlotColor	-16733546
AnalysisSetup	Analysis.Setup.Vector.Graph.Preference.Plots.Y8.Thickness	1
AnalysisSetup	Analysis.Setup.Vector.Graph.Preference.Text.AxisTitle.FontName	Tahoma
AnalysisSetup	Analysis.Setup.Vector.Graph.Preference.Text.AxisTitle.RelativeSize	Medium
AnalysisSetup	Analysis.Setup.Vector.Graph.Preference.Text.AxisTitle.Size	7
AnalysisSetup	Analysis.Setup.Vector.Graph.Preference.Text.ScaleText.FontName	Tahoma
AnalysisSetup	Analysis.Setup.Vector.Graph.Preference.Text.ScaleText.RelativeSize	Medium
AnalysisSetup	Analysis.Setup.Vector.Graph.Preference.Text.ScaleText.Size	7
AnalysisSetup	Analysis.Setup.Vector.Graph.Preference.Text.Legend.FontName	Tahoma
AnalysisSetup	Analysis.Setup.Vector.Graph.Preference.Text.Legend.RelativeSize	Medium
AnalysisSetup	Analysis.Setup.Vector.Graph.Preference.Text.Legend.Size	7
AnalysisSetup	Analysis.Setup.Vector.Graph.Preference.Scale.LogTickedDecadeCount	6
AnalysisSetup	Analysis.Setup.Vector.Graph.Preference.GridVisible	true
AnalysisSetup	Analysis.Setup.Vector.List.Datum.Name	I1	I2	I3	I4	V1	V2	V3	V4	drop
AnalysisSetup	Analysis.Setup.Vector.List.Datum.Unit	A	A	A	A	V	V	V	V	V
AnalysisSetup	Analysis.Setup.Preference.GraphVisible	true
AnalysisSetup	Analysis.Setup.Preference.ListVisible	true
AnalysisSetup	Analysis.Setup.Preference.ScalarVisible	true
AnalysisSetup	Analysis.Setup.Title	4-Point R Measurement Test
Dimension1	42	42	42	42	42	42	42	42	42	42
Dimension2	1	1	1	1	1	1	1	1	1	1
DataName	I1	I2	I3	V4	V2	V3	V1	I4	drop	R	flipped drop
DataValue	-1e-09	0	0	0	-0.18703	-0.242678	-0.370742	1.0058e-09	0.055648	-5.5648e+07	-0.055648
DataValue	-9e-10	0	0	0	-0.179238	-0.224964	-0.337546	8.9195e-10	0.045726	-5.08067e+07	-0.045726
DataValue	-8e-10	0	0	0	-0.162654	-0.204246	-0.30484	7.8639e-10	0.041592	-5.199e+07	-0.041592
DataValue	-7e-10	0	0	0	-0.141244	-0.17766	-0.266172	7.0098e-10	0.036416	-5.20229e+07	-0.036416
DataValue	-6e-10	0	0	0	-0.122152	-0.153344	-0.229192	5.938e-10	0.031192	-5.19867e+07	-0.031192
DataValue	-5e-10	0	0	0	-0.102452	-0.128418	-0.191394	4.6883e-10	0.025966	-51932000	-0.025966
DataValue	-4e-10	0	0	0	-0.0819	-0.102468	-0.152776	3.9879e-10	0.020568	-5.142e+07	-0.020568
DataValue	-3e-10	0	0	0	-0.060632	-0.076466	-0.114672	2.9388e-10	0.015834	-5.278e+07	-0.015834
DataValue	-2e-10	0	0	0	-0.0412	-0.05169	-0.077124	1.9811e-10	0.01049	-5.245e+07	-0.01049
DataValue	-1e-10	0	0	0	-0.021238	-0.02649	-0.039198	1.0337e-10	0.005252	-5.252e+07	-0.005252
DataValue	0	0	0	0	-0.000894	-0.000484	-0.001056	6.34e-12	-0.00041		0.00041
DataValue	1e-10	0	0	0	0.020996	0.02595	0.038602	-1.0344e-10	-0.004954	-4.954e+07	0.004954
DataValue	2e-10	0	0	0	0.039304	0.049602	0.074884	-2.0221e-10	-0.010298	-51490000	0.010298
DataValue	3e-10	0	0	0	0.05939	0.074968	0.113232	-3.0187e-10	-0.015578	-5.19267e+07	0.015578
DataValue	4e-10	0	0	0	0.079004	0.099856	0.151416	-3.8941e-10	-0.020852	-52130000	0.020852
DataValue	5e-10	0	0	0	0.098366	0.123688	0.18725	-4.9301e-10	-0.025322	-5.0644e+07	0.025322
DataValue	6e-10	0	0	0	0.11962	0.150888	0.226174	-6.0918e-10	-0.031268	-5.21133e+07	0.031268
DataValue	7e-10	0	0	0	0.14066	0.176898	0.265264	-6.9826e-10	-0.036238	-5.17686e+07	0.036238
DataValue	8e-10	0	0	0	0.161264	0.203078	0.304604	-8.3684e-10	-0.041814	-5.22675e+07	0.041814
DataValue	9e-10	0	0	0	0.178076	0.224838	0.33971	-9.0858e-10	-0.046762	-5.19578e+07	0.046762
DataValue	1e-09	0	0	0	0.197802	0.250258	0.377346	-9.9776e-10	-0.052456	-52456000	0.052456
DataValue	1e-09	0	0	0	0.199154	0.250688	0.377298	-9.9134e-10	-0.051534	-5.1534e+07	0.051534
DataValue	9e-10	0	0	0	0.1773	0.22406	0.338294	-8.9954e-10	-0.04676	-5.19556e+07	0.04676
DataValue	8e-10	0	0	0	0.165968	0.20767	0.308608	-7.9812e-10	-0.041702	-5.21275e+07	0.041702
DataValue	7e-10	0	0	0	0.144802	0.18089	0.269264	-6.8376e-10	-0.036088	-5.15543e+07	0.036088
DataValue	6e-10	0	0	0	0.125426	0.157368	0.23306	-6.1286e-10	-0.031942	-5.32367e+07	0.031942
DataValue	5e-10	0	0	0	0.104398	0.130712	0.194464	-4.9981e-10	-0.026314	-52628000	0.026314
DataValue	4e-10	0	0	0	0.083826	0.105014	0.156262	-4.0391e-10	-0.021188	-5.297e+07	0.021188
DataValue	3e-10	0	0	0	0.063036	0.079018	0.117414	-3.0198e-10	-0.015982	-5.32733e+07	0.015982
DataValue	2e-10	0	0	0	0.041814	0.05244	0.078216	-1.8679e-10	-0.010626	-53130000	0.010626
DataValue	1e-10	0	0	0	0.021556	0.027174	0.03978	-9.779e-11	-0.005618	-56180000	0.005618
DataValue	0	0	0	0	0.000682	0.000734	0.000804	-5.94e-12	-5.2e-05		5.2e-05											Resistance(Ohms)	Number of cables	Gap size (m)
DataValue	-1e-10	0	0	0	-0.020158	-0.025312	-0.037906	9.76e-11	0.005154	-5.154e+07	-0.005154											5.26316e+07	10	2e-05
DataValue	-2e-10	0	0	0	-0.04171	-0.05218	-0.07711	2.0623e-10	0.01047	-52350000	-0.01047											Number of fibers per cable	Total number of fibers	single fiber diameter (m)
DataValue	-3e-10	0	0	0	-0.062294	-0.077696	-0.116002	2.9537e-10	0.015402	-51340000	-0.015402											35	350	5e-08
DataValue	-4e-10	0	0	0	-0.082872	-0.103824	-0.154566	3.9581e-10	0.020952	-5.238e+07	-0.020952											Single fiber cross-sectional area (m^2)	Single fiber resistivity (Ohm*m)	Single fiber conductivity (S/m)
DataValue	-5e-10	0	0	0	-0.10444	-0.130402	-0.19333	4.9556e-10	0.025962	-5.1924e+07	-0.025962											1.9635e-15	1.80848	0.55295
DataValue	-6e-10	0	0	0	-0.125756	-0.157274	-0.233026	5.9734e-10	0.031518	-5.253e+07	-0.031518											Single fiber conductivity (S/cm)
DataValue	-7e-10	0	0	0	-0.145846	-0.1826	-0.271428	7.1677e-10	0.036754	-5.25057e+07	-0.036754											0.0055295
DataValue	-8e-10	0	0	0	-0.166464	-0.207856	-0.309028	7.9777e-10	0.041392	-5.174e+07	-0.041392
DataValue	-9e-10	0	0	0	-0.186558	-0.233618	-0.347038	8.9682e-10	0.04706	-5.22889e+07	-0.04706
DataValue	-1e-09	0	0	0	-0.206096	-0.258664	-0.384888	9.9789e-10	0.052568	-52568000	-0.052568
